# Supplementary material for: Palladium(II) Complexes of Substituted Salicylaldehydes: Synthesis, Characterization and Investigation of Their Biological Profile
Source: Pharmaceuticals (Basel). 2022 Jul 18;15(7):886. doi: 10.3390/ph15070886 (PMC9323974; doi:10.3390/ph15070886)

---

The following ALERTS were generated. Each ALERT has the format

**test-name\_ALERT\_alert-type\_alert-level.**

Click on the hyperlinks for more details of the test.

---

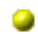

### Alert level C

PLAT911\_ALERT\_3\_C Missing FCF Refl Between Thmin & STh/L= 0.600 24 Report

---

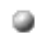

### Alert level G

PLAT002\_ALERT\_2\_G Number of Distance or Angle Restraints on AtSite 3 Note  
PLAT003\_ALERT\_2\_G Number of Uiso or Uij Restrained non-H Atoms ... 3 Report  
PLAT042\_ALERT\_1\_G Calc. and Reported Moiety Formula Strings Differ Please Check  
PLAT045\_ALERT\_1\_G Calculated and Reported Z Differ by a Factor ... 0.50 Check  
PLAT300\_ALERT\_4\_G Atom Site Occupancy of N2 Constrained at 0.5 Check  
PLAT300\_ALERT\_4\_G Atom Site Occupancy of C12 Constrained at 0.5 Check  
PLAT300\_ALERT\_4\_G Atom Site Occupancy of C13 Constrained at 0.5 Check  
PLAT300\_ALERT\_4\_G Atom Site Occupancy of H131 Constrained at 0.5 Check  
PLAT300\_ALERT\_4\_G Atom Site Occupancy of H132 Constrained at 0.5 Check  
PLAT300\_ALERT\_4\_G Atom Site Occupancy of H133 Constrained at 0.5 Check  
PLAT302\_ALERT\_4\_G Anion/Solvent/Minor-Residue Disorder (Resd 2 ) 100% Note  
PLAT413\_ALERT\_2\_G Short Inter XH3 .. XHn H11 ..H131 . 1.94 Ang.  
1+x,y,z = 1\_655 Check  
PLAT413\_ALERT\_2\_G Short Inter XH3 .. XHn H112 ..H133 . 2.08 Ang.  
1/2-x,-1/2+y,1/2-z = 3\_545 Check  
PLAT769\_ALERT\_4\_G CIF Embedded explicitly supplied scattering data Please Note  
PLAT794\_ALERT\_5\_G Tentative Bond Valency for Pd1 (II) . 2.40 Info  
PLAT808\_ALERT\_5\_G No Parseable SHELXL Style Weighting Scheme Found Please Check  
PLAT860\_ALERT\_3\_G Number of Least-Squares Restraints ..... 4 Note  
PLAT882\_ALERT\_1\_G No Datum for \_diffrn\_reflms\_av\_unetI/netI ..... Please Do !  
PLAT912\_ALERT\_4\_G Missing # of FCF Reflections Above STh/L= 0.600 8 Note  
PLAT913\_ALERT\_3\_G Missing # of Very Strong Reflections in FCF .... 3 Note  
PLAT929\_ALERT\_5\_G No Weight Pars,Obs and Calc R1,wR2,S not Checked ! Info  
PLAT960\_ALERT\_3\_G Number of Intensities with I < - 2\*sig(I) ... 2 Check

---

- 0 **ALERT level A** = Most likely a serious problem - resolve or explain  
0 **ALERT level B** = A potentially serious problem, consider carefully  
1 **ALERT level C** = Check. Ensure it is not caused by an omission or oversight  
22 **ALERT level G** = General information/check it is not something unexpected

- 3 ALERT type 1 CIF construction/syntax error, inconsistent or missing data  
4 ALERT type 2 Indicator that the structure model may be wrong or deficient  
4 ALERT type 3 Indicator that the structure quality may be low  
9 ALERT type 4 Improvement, methodology, query or suggestion  
3 ALERT type 5 Informative message, check
- 
-

It is advisable to attempt to resolve as many as possible of the alerts in all categories. Often the minor alerts point to easily fixed oversights, errors and omissions in your CIF or refinement strategy, so attention to these fine details can be worthwhile. In order to resolve some of the more serious problems it may be necessary to carry out additional measurements or structure refinements. However, the purpose of your study may justify the reported deviations and the more serious of these should normally be commented upon in the discussion or experimental section of a paper or in the "special\_details" fields of the CIF. checkCIF was carefully designed to identify outliers and unusual parameters, but every test has its limitations and alerts that are not important in a particular case may appear. Conversely, the absence of alerts does not guarantee there are no aspects of the results needing attention. It is up to the individual to critically assess their own results and, if necessary, seek expert advice.

### **Publication of your CIF in IUCr journals**

A basic structural check has been run on your CIF. These basic checks will be run on all CIFs submitted for publication in IUCr journals (*Acta Crystallographica*, *Journal of Applied Crystallography*, *Journal of Synchrotron Radiation*); however, if you intend to submit to *Acta Crystallographica Section C* or *E* or *IUCrData*, you should make sure that full publication checks are run on the final version of your CIF prior to submission.

### **Publication of your CIF in other journals**

Please refer to the *Notes for Authors* of the relevant journal for any special instructions relating to CIF submission.

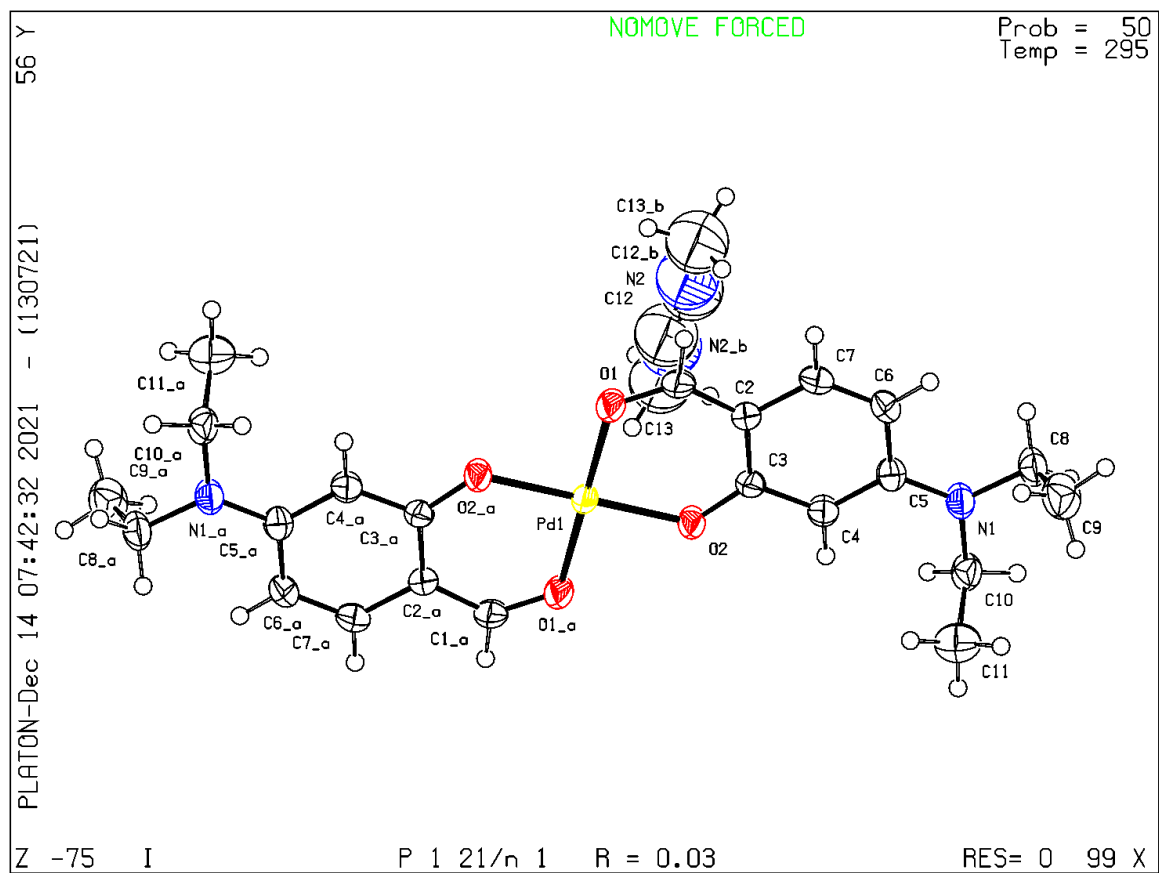

Supplement: Supplementary file 1 [file pharmaceuticals-15-00886-s001.zip › checkcif of 1.pdf]
