# Supplementary material for: Palladium(II) Complexes of Substituted Salicylaldehydes: Synthesis, Characterization and Investigation of Their Biological Profile
Source: Pharmaceuticals (Basel). 2022 Jul 18;15(7):886. doi: 10.3390/ph15070886 (PMC9323974; doi:10.3390/ph15070886)
Supplement: Supplementary file 1 [file pharmaceuticals-15-00886-s001.zip › cif of 1.cif]

data_global 
_audit_creation_date        "2021-12-14"
_audit_creation_method CRYSTALS_ver_14.61_build_6236 

_oxford_structure_analysis_title  'ps_za74e_0m_a.res in P2(1)/n'
_chemical_name_systematic         ?
_chemical_melting_point           ?

#looking for refcif 
 
 
# Check this file using the IUCr facility at: 
# http://checkcif.iucr.org/ 
 
# The content below is held in the file 'script/refcif.dat'. This is a text 
# file which you may edit to reflect local conditions. 
# Items which need looking at are represented by a '?'. 
# Items for which there are choices are prefixed with 'choose from'. 
 
_publ_contact_letter 
; 
 Please consider this CIF submission for 
 publication as a Short Format Paper in Acta 
 Crystallographica E. 
; 
_publ_contact_author_name         'Anthony Other' 
_publ_contact_author_address 
; 
 Chemical Crystallography Laboratory, 
 Department of Chemistry, 
 University of Nowhere, 
 Nowhere, NO1 4T, UK. 
; 
 
_publ_contact_author_phone        '+44 1865 000000' 
_publ_contact_author_fax          '+44 1865 000000' 
_publ_contact_author_email        'a.n.other@chem.no.ac.uk' 
_publ_requested_journal           'Section E' 
_publ_requested_category          EO # choose from: FI FM FO CI CM CO AD 
_publ_requested_coeditor_name     'Prof William Clegg' 
 
_publ_section_title 
# Title of paper - generally just the systematic or trivial name 
; ? 
; 
 
# The loop structure below should contain the names and addresses of all 
# authors, in the required order of publication. Repeat as necessary. 
loop_ 
 _publ_author_name 
 _publ_author_address 
 _publ_author_footnote 
 'Other, Anthony N.' # Author 1 
; 
 ? # Address for author 1 
; 
; 
 ? # Footnote for author 1 
; 
 'Else, S. O.' # Author 2 
; 
 ? # Address 2 
; 
; 
 ? # Footnote 2 
; 
 
 
_publ_section_abstract 
# Text of the abstract 
# (a) The Abstract must be self-contained and comprehensible 
# without the rest of the paper. This means no references 
# to atom names or to compound numbers; compounds must be 
# identified as the title compound, or by name or by some other 
# means such as derivatives of each other (e.g. "the 
# corresponding ketone"). 
# (b) The chemical formula of "the title compound" must be given. 
# (c) Any crystallographic molecular symmetry should be 
# mentioned, and also the presence of more than one molecule 
# in the asymmetric unit (i.e. anything other than Z'=1). 
; 
? 
; 
 
_publ_section_related_literature  # Not in version 2.3.1 
############################################################### 
# Essential references (e.g. to the origin of the material studied, related 
# structural studies, and to information supporting the reported structure) 
# should be cited in this section, with appropriate very brief explanatory 
# text, for example `The synthesis of the complex is described by Jones 
# (2001). The anhydrous complex has essentially the same coordination 
# geometry (Smith, 2003).' In addition, all references included in the 
# supplementary materials, but not elsewhere in the published article, 
# should be given here. The simple text `For related literature, see:...' 
# may be used, but further details should be provided in the Comment 
# section, which forms part of the supplementary material. 
############################################################### 
; 
? 
; 
 
_publ_section_comment 
# Text of the paper 
# Note that atoms are referenced as N2, not N(2) or N~2~ 
# If text containing () occur within (), the outer ones should be [] 
# Figures should be referenced as Fig. 
; 
? 
; 
_publ_section_acknowledgements    # Acknowledgments 
; 
? 
; 
_publ_section_figure_captions 
# Captions to figures - Start each caption on a new line after a blank line 
; 
Fig. 1. 
The title compound with displacement ellipsoids drawn at the 50% 
probability level. H atoms are shown as spheres of 
arbitary radius. 
 
; 
 
 
_publ_section_exptl_refinement 
# Some potentially useful phrases are donated by Bill Clegg: 
; 
In the absence of significant anomalous scattering, Friedel pairs were 
merged. 
 
The absolute configuration was arbitrarily assigned. 
 
The relatively large ratio of minimum to maximum corrections applied 
in the multiscan process (1:nnn) reflect changes in the illuminated 
volume of the crystal. 
 
Changes in illuminated volume were kept to a minimum, and were 
taken into account (G\"orbitz, 1999) by the multi-scan inter-frame 
scaling (DENZO/SCALEPACK, Otwinowski & Minor, 1997). 
 
 
G\"orbitz, C. H. (1999). Acta Cryst. B55, 1090-1098. 
 
 
 
 
The H atoms were all located in a difference map, but those 
attached to carbon atoms were repositioned geometrically. 
The H atoms were initially refined with soft restraints on the 
bond lengths and angles to regularise their geometry 
(C---H in the range 0.93--0.98, 
N---H in the range 0.86--0.89 
N---H to 0.86 
O---H = 0.82 
\%A) 
and 
U~iso~(H) (in the range 1.2-1.5 times U~eq~ of the parent atom), 
after which the positions were refined with riding constraints 
(Cooper et al, 2010). 
 
Cooper, R. I., Thompson, A. L. & Watkin, D. J. (2010). J. Appl. Cryst. 
43, 1100-1107. 
 
; 
 
_publ_section_exptl_prep 
# Brief details or a reference. Include solvent if known 
; 
? 
; 
 
# Hand-made tables can be put in the cif. The number of columns 
# is set in the loop header. 
# The contants of each column can either be a piece of text 
# without any spaces (eg a number) or other text enclosed in " " 
# Remove the leading # in the following example 
 
#_geom_extra_table_head_A 
#; 
#Table 2. 
#Molecular parameters deviating most from MOGUL averages 
#; 
# 
#loop_ 
#_geom_extra_tableA_col_1 
#_geom_extra_tableA_col_2 
#_geom_extra_tableA_col_3 
#_geom_extra_tableA_col_4 
# 
#Parameter "Observed Value" "MOGUL Value" "MOGUL e.s.d" 
#N5-C6-C4 129 124 "7 (\%)" 
#C3-O10-C2 105 109 "2 (\%)" 
#C6-O7 1.25 1.22 ".02 (\%A)" 
# 
 
data_I 
 
_exptl_special_details 
; 
 The crystal was 
placed in the cold stream of an Oxford 
Cryosystems open-flow nitrogen cryostat (Cosier & 
Glazer, 1986) with a nominal stability of 0.1K. 
 
Cosier, J. & Glazer, A.M., 1986. J. Appl. Cryst. 105-107. 
; 
_refine_special_details 
; 
? 
; 
#--------------------------------------------------------------- 
# _oxford_ data items, April 2010: 
# There is some uncertainty about the correct way of forming local data 
# names, e.g. 
 
# _atom_site_special_shape_oxford 
# or 
# _oxford_atom_site_special_shape 
 
# see: 
# http://www.iucr.org/resources/cif/spec/version1.1/semantics#namespace 
 
# A reserved prefix, e.g. foo, must be used in the following way 
# " If the data file contains items defined in a DDL1 dictionary, the 
# local data names assigned under the reserved prefix must contain it as 
# their first component, e.g. _foo_atom_site_my_item. " 
 
# However, this seems to say the opposite: 
# http://www.iucr.org/__data/iucr/cif/standard/cifstd8.html 
 
# According to advice from the IUCr, CRYSTALS is correct 
#--------------------------------------------------------------- 
# End of 'script/refcif.dat' 
#end of refcif 
_cell_length_a                    6.4774(6)
_cell_length_b                    8.7509(8)
_cell_length_c                    21.197(2)
_cell_angle_alpha                 90
_cell_angle_beta                  98.350(3)
_cell_angle_gamma                 90
_cell_volume                      1188.76(19)
 
_symmetry_cell_setting            'monoclinic' 
_symmetry_space_group_name_H-M    'P 1 21/n 1 ' 
_symmetry_space_group_name_Hall   ? 
loop_
 _symmetry_equiv_pos_as_xyz
 'x,y,z'
 '-x,-y,-z'
 '-x+1/2,y+1/2,-z+1/2'
 'x+1/2,-y+1/2,z+1/2'

loop_
_atom_type_symbol
_atom_type_scat_dispersion_real
_atom_type_scat_dispersion_imag
_atom_type_scat_Cromer_Mann_a1
_atom_type_scat_Cromer_Mann_b1
_atom_type_scat_Cromer_Mann_a2
_atom_type_scat_Cromer_Mann_b2
_atom_type_scat_Cromer_Mann_a3
_atom_type_scat_Cromer_Mann_b3
_atom_type_scat_Cromer_Mann_a4
_atom_type_scat_Cromer_Mann_b4
_atom_type_scat_Cromer_Mann_c
_atom_type_scat_source  
 C       0.0033   0.0016   2.3100  20.8439   1.0200  10.2075   1.5886   0.5687
   0.8650  51.6512   0.2156 'International Tables Vol C 4.2.6.8 and 6.1.1.4'
 H       0.0000   0.0000   0.4930  10.5109   0.3229  26.1257   0.1402   3.1424
   0.0408  57.7998   0.0030 'International Tables Vol C 4.2.6.8 and 6.1.1.4'
 N       0.0061   0.0033  12.2126   0.0057   3.1322   9.8933   2.0125  28.9975
   1.1663   0.5826 -11.5290 'International Tables Vol C 4.2.6.8 and 6.1.1.4'
 O       0.0106   0.0060   3.0485  13.2771   2.2868   5.7011   1.5463   0.3239
   0.8670  32.9089   0.2508 'International Tables Vol C 4.2.6.8 and 6.1.1.4'
 Pd     -0.9988   1.0072  19.3319   0.6987  15.5017   7.9893   5.2954  25.2052
   0.6058  76.8986   5.2659 'International Tables Vol C 4.2.6.8 and 6.1.1.4'
 
 
_cell_formula_units_Z                    2

# Given Formula = C24 H28 N4 O2 Pd1 
# Dc =      1.43 Fooo =    524.00 Mu =      8.07 M =    510.91
# Found Formula = C24 H31 N3 O4 Pd1 
# Dc =      1.49 FOOO =    548.00 Mu =      8.15 M =    531.93

_chemical_formula_sum             'C24 H31 N3 O4 Pd1'
_chemical_formula_moiety          'C24 H31 N3 O4 Pd1'
_chemical_compound_source                ?
_chemical_formula_weight            531.93
 
 
_cell_measurement_reflns_used          225
_cell_measurement_theta_min             10
_cell_measurement_theta_max             20
_cell_measurement_temperature          295
 
_exptl_crystal_description        'plate' 
_exptl_crystal_colour             'green' 
_exptl_crystal_size_min           0.050 
_exptl_crystal_size_mid           0.160 
_exptl_crystal_size_max           0.180 
 
_exptl_crystal_density_diffrn     1.486 
_exptl_crystal_density_meas       ? 
_exptl_crystal_density_method     'not measured' 
# Non-dispersive F(000): 
_exptl_crystal_F_000              548 
_exptl_absorpt_coefficient_mu     0.815 
 
# Sheldrick geometric approximatio 0.88 0.96 
_exptl_absorpt_correction_type    numerical 
_exptl_absorpt_process_details 
; 
 Analytical Absorption (De Meulenaer & Tompa, 1965) 
; 
_exptl_absorpt_correction_T_min   0.88 
_exptl_absorpt_correction_T_max   0.96 
_diffrn_measurement_device_type   'Bruker Kappa Apex2' 
_diffrn_measurement_device        'Area' 
_diffrn_radiation_monochromator   'graphite' 
_diffrn_radiation_type            'Mo K\a'
_diffrn_radiation_wavelength           0.71073
_diffrn_measurement_method        '\f & \w scans' 
 
# If a reference occurs more than once, delete the author 
# and date from subsequent references. 
_computing_data_collection        'Apex2 (Bruker AXS, 2006)' 
_computing_cell_refinement        'Apex2 (Bruker AXS, 2006)' 
_computing_data_reduction         'Apex2 (Bruker AXS, 2006)' 
_computing_structure_solution     'Superflip (Palatinus & Chapuis, 2007)' 
_computing_structure_refinement   'CRYSTALS (Betteridge et al., 2003)' 
_computing_publication_material   'CRYSTALS (Betteridge et al., 2003)' 
_computing_molecular_graphics     'CAMERON (Watkin et al., 1996)' 
 
_diffrn_standards_interval_time   . 
_diffrn_standards_interval_count  . 
_diffrn_standards_number          0 
_diffrn_standards_decay_%         ? 
 
_diffrn_ambient_temperature        295
_diffrn_reflns_number             5412 
_reflns_number_total              2246 
_diffrn_reflns_av_R_equivalents   0.023 
# Number of reflections without Friedels Law is 0 
# Number of reflections with Friedels Law is 2246 
# Theoretical number of reflections is about 4562 
 
 
_diffrn_reflns_theta_min          1.942 
_diffrn_reflns_theta_max          25.777 
_diffrn_measured_fraction_theta_max 0.989 
 
_diffrn_reflns_theta_full         25.261 
_diffrn_measured_fraction_theta_full 0.992 
 
 
_diffrn_reflns_limit_h_min        -6 
_diffrn_reflns_limit_h_max        7 
_diffrn_reflns_limit_k_min        -10 
_diffrn_reflns_limit_k_max        10 
_diffrn_reflns_limit_l_min        -24 
_diffrn_reflns_limit_l_max        25 
_reflns_limit_h_min               -7 
_reflns_limit_h_max               7 
_reflns_limit_k_min               0 
_reflns_limit_k_max               10 
_reflns_limit_l_min               0 
_reflns_limit_l_max               25 
 
_oxford_diffrn_Wilson_B_factor    2.17 
_oxford_diffrn_Wilson_scale       2.11 
 
_atom_sites_solution_primary      Other  #heavy,direct,difmap,geom,iterative
# _atom_sites_solution_secondary  difmap
_atom_sites_solution_hydrogens    difmap
 
_refine_diff_density_min          -0.44 
_refine_diff_density_max          0.56 
 
 
# The current dictionary definitions do not cover the 
# situation where the reflections used for refinement were 
# selected by a user-defined sigma threshold 
 
 
# The values actually used during refinement 
_oxford_reflns_threshold_expression_ref     I>2.0\s(I)
_refine_ls_number_reflns          1960 
_refine_ls_number_restraints      4 
_refine_ls_number_parameters      145 
_oxford_refine_ls_R_factor_ref    0.0345 
_refine_ls_wR_factor_ref          0.0666 
_refine_ls_goodness_of_fit_ref    0.9998 
_refine_ls_shift/su_max           0.0001296 
_refine_ls_shift/su_mean          0.0000132 
 
 
# The values computed with all filters except I/sigma 
_oxford_reflns_number_all         2239 
_refine_ls_R_factor_all           0.0417 
_refine_ls_wR_factor_all          0.0726 
 
# The values computed with a 2 sigma cutoff - a la SHELX 
_reflns_threshold_expression      I>2.0\s(I)
_reflns_number_gt                 1960 
_refine_ls_R_factor_gt            0.0345 
_refine_ls_wR_factor_gt           0.0666 
 
# choose from: rm (reference molecule of known chirality), 
# ad (anomolous dispersion - Flack), rmad (rm and ad), 
# syn (from synthesis), unk (unknown) or . (not applicable). 
_chemical_absolute_configuration  '.' 
 
 
_refine_ls_structure_factor_coef  Fsqd 
_refine_ls_matrix_type            full
_refine_ls_hydrogen_treatment     constr         #undef, noref, refall,
                                                 # refxyz, refU, constr or mixed
 
# WARNING. The IUCr will not accept pure Unit Weights for F-squared refinements 
_refine_ls_weighting_scheme       calc 
_refine_ls_weighting_details 
;
 Method= Quasi-Unit weights 
 W = 1.0 or 1./4Fsq 
;
# Insert your own references if required - in alphabetical order 
_publ_section_references 
; 
Betteridge, P.W., Carruthers, J.R., Cooper, R.I., 
Prout, K. & Watkin, D.J. (2003). J. Appl. Cryst. 36, 1487. 
 
Bruker Analytical X-ray Systems, Inc., 2006. <i>Apex2</i>, 
Version 2 User Manual, M86-E01078, Madison, WI. 
 
De Meulenaer, J. & Tompa, H. (1965). Acta Cryst. 19, 1014. 
 
Palatinus, L. & Chapuis, G. (2007). J. Appl. Cryst. 40, 786-790. 
 
Watkin, D.J., Prout, C.K. & Pearce, L.J. (1996). CAMERON, Chemical 
Crystallography Laboratory, Oxford, UK. 
; 

# Uequiv = arithmetic mean of Ui i.e. Ueqiv = (U1+U2+U3)/3

# Replace last . with number of unfound hydrogen atoms attached to an atom.

# ..._refinement_flags_... 
# . no refinement constraints           S special position constraint on site
# G rigid group refinement of site      R riding atom
# D distance or angle restraint on site T thermal displacement constraints
# U Uiso or Uij restraint (rigid bond)  P partial occupancy constraint


loop_
_atom_site_label
_atom_site_type_symbol
_atom_site_fract_x
_atom_site_fract_y
_atom_site_fract_z
_atom_site_U_iso_or_equiv
_atom_site_occupancy
_atom_site_adp_type
_atom_site_refinement_flags_posn
_atom_site_refinement_flags_adp
_atom_site_refinement_flags_occupancy
_atom_site_disorder_assembly
_atom_site_disorder_group
_atom_site_attached_hydrogens
Pd1 Pd 0.5000 0.5000 0.5000 0.0300 1.0000 Uani S . . . . . 
O1 O 0.7819(4) 0.5934(3) 0.50626(10) 0.0433 1.0000 Uani . . . . . . 
O2 O 0.4046(3) 0.5758(3) 0.41289(10) 0.0376 1.0000 Uani . . . . . . 
N1 N 0.4467(4) 0.8105(3) 0.21520(13) 0.0360 1.0000 Uani . . . . . . 
N2 N 0.6229(16) 1.022(2) 0.5021(8) 0.124(3) 0.5000 Uiso D U . . 1 . 
C1 C 0.8415(5) 0.6655(4) 0.46096(16) 0.0382 1.0000 Uani . . . . . . 
C2 C 0.7317(5) 0.6978(4) 0.40078(15) 0.0305 1.0000 Uani . . . . . . 
C3 C 0.5206(5) 0.6515(4) 0.37891(14) 0.0287 1.0000 Uani . . . . . . 
C4 C 0.4337(5) 0.6889(4) 0.31633(15) 0.0324 1.0000 Uani . . . . . . 
C5 C 0.5392(5) 0.7725(4) 0.27480(15) 0.0317 1.0000 Uani . . . . . . 
C6 C 0.7490(5) 0.8187(4) 0.29779(16) 0.0366 1.0000 Uani . . . . . . 
C7 C 0.8367(5) 0.7829(4) 0.35762(16) 0.0364 1.0000 Uani . . . . . . 
C8 C 0.5583(6) 0.8891(4) 0.16933(16) 0.0412 1.0000 Uani . . . . . . 
C9 C 0.6770(7) 0.7840(6) 0.1321(2) 0.0581 1.0000 Uani . . . . . . 
C10 C 0.2373(5) 0.7574(4) 0.19036(17) 0.0400 1.0000 Uani . . . . . . 
C11 C 0.2298(7) 0.5915(5) 0.1703(2) 0.0595 1.0000 Uani . . . . . . 
C12 C 0.4590(17) 0.958(2) 0.5023(13) 0.127(3) 0.5000 Uiso D U . . 1 . 
C13 C 0.2249(17) 0.963(2) 0.4966(7) 0.126(3) 0.5000 Uiso D U . . 1 . 
H11 H 0.9777 0.7042 0.4693 0.0461 1.0000 Uiso R . . . . . 
H41 H 0.2994 0.6548 0.3016 0.0389 1.0000 Uiso R . . . . . 
H61 H 0.8253 0.8713 0.2711 0.0440 1.0000 Uiso R . . . . . 
H71 H 0.9738 0.8153 0.3716 0.0441 1.0000 Uiso R . . . . . 
H81 H 0.4540 0.9423 0.1400 0.0491 1.0000 Uiso R . . . . . 
H82 H 0.6540 0.9629 0.1919 0.0488 1.0000 Uiso R . . . . . 
H91 H 0.7619 0.8418 0.1068 0.0867 1.0000 Uiso R . . . . . 
H92 H 0.5817 0.7216 0.1042 0.0869 1.0000 Uiso R . . . . . 
H93 H 0.7649 0.7176 0.1606 0.0867 1.0000 Uiso R . . . . . 
H101 H 0.1839 0.8196 0.1534 0.0483 1.0000 Uiso R . . . . . 
H102 H 0.1481 0.7716 0.2232 0.0482 1.0000 Uiso R . . . . . 
H111 H 0.0868 0.5602 0.1577 0.0890 1.0000 Uiso R . . . . . 
H112 H 0.3003 0.5821 0.1336 0.0891 1.0000 Uiso R . . . . . 
H113 H 0.2972 0.5271 0.2049 0.0892 1.0000 Uiso R . . . . . 
H131 H 0.1723 0.8631 0.5025 0.1882 0.5000 Uiso R . . . 1 . 
H132 H 0.1782 1.0287 0.5273 0.1881 0.5000 Uiso R . . . 1 . 
H133 H 0.1645 0.9982 0.4558 0.1882 0.5000 Uiso R . . . 1 . 
loop_
_atom_site_aniso_label
_atom_site_aniso_U_11
_atom_site_aniso_U_22
_atom_site_aniso_U_33
_atom_site_aniso_U_23
_atom_site_aniso_U_13
_atom_site_aniso_U_12
Pd1 0.03014(18) 0.0385(2) 0.02112(16) 0.00156(17) 0.00304(12) -0.00816(18) 
O1 0.0362(13) 0.0641(18) 0.0275(12) 0.0078(12) -0.0025(10) -0.0197(13) 
O2 0.0293(12) 0.0566(15) 0.0261(11) 0.0086(11) 0.0009(9) -0.0145(11) 
N1 0.0361(15) 0.0412(17) 0.0304(14) 0.0091(13) 0.0038(12) -0.0016(13) 
C1 0.0302(17) 0.048(2) 0.0352(18) -0.0011(16) 0.0007(14) -0.0156(16) 
C2 0.0330(17) 0.0313(17) 0.0269(15) -0.0010(14) 0.0025(13) -0.0072(14) 
C3 0.0290(16) 0.0299(17) 0.0276(15) -0.0018(13) 0.0053(13) -0.0066(13) 
C4 0.0247(16) 0.0400(19) 0.0320(17) 0.0034(15) 0.0025(13) -0.0040(14) 
C5 0.0334(17) 0.0313(17) 0.0305(16) 0.0039(14) 0.0052(13) 0.0032(14) 
C6 0.0368(19) 0.040(2) 0.0335(17) 0.0057(15) 0.0077(14) -0.0101(16) 
C7 0.0313(18) 0.038(2) 0.0397(19) 0.0005(16) 0.0033(14) -0.0116(15) 
C8 0.042(2) 0.047(2) 0.0340(18) 0.0149(16) 0.0040(15) -0.0014(17) 
C9 0.055(3) 0.070(3) 0.053(2) 0.005(2) 0.021(2) -0.003(2) 
C10 0.0373(19) 0.048(2) 0.0325(18) 0.0108(16) -0.0015(14) 0.0001(17) 
C11 0.052(3) 0.060(3) 0.066(3) -0.005(2) 0.003(2) -0.006(2) 

_refine_ls_extinction_method 
    'None'
_oxford_refine_ls_scale 0.7469(16) 
loop_
 _geom_bond_atom_site_label_1
 _geom_bond_site_symmetry_1
 _geom_bond_atom_site_label_2
 _geom_bond_site_symmetry_2
 _geom_bond_distance
 _geom_bond_publ_flag
Pd1 . O1 2_666 1.987(2)    yes
Pd1 . O2 2_666 1.975(2)    yes
Pd1 . O1 . 1.987(2)    yes
Pd1 . O2 . 1.975(2)    yes
O1 . C1 . 1.256(4)    yes
O2 . C3 . 1.296(4)    yes
N1 . C5 . 1.359(4)    yes
N1 . C8 . 1.465(4)    yes
N1 . C10 . 1.458(4)    yes
N2 . C12 . 1.200(5)    yes
C1 . C2 . 1.396(4)    yes
C1 . H11 . 0.938    no
C2 . C3 . 1.437(4)    yes
C2 . C7 . 1.426(4)    yes
C3 . C4 . 1.402(4)    yes
C4 . C5 . 1.397(4)    yes
C4 . H41 . 0.930    no
C5 . C6 . 1.434(5)    yes
C6 . C7 . 1.349(5)    yes
C6 . H61 . 0.926    no
C7 . H71 . 0.938    no
C8 . C9 . 1.495(6)    yes
C8 . H81 . 0.968    no
C8 . H82 . 0.972    no
C9 . H91 . 0.965    no
C9 . H92 . 0.961    no
C9 . H93 . 0.963    no
C10 . C11 . 1.511(6)    yes
C10 . H101 . 0.975    no
C10 . H102 . 0.975    no
C11 . H111 . 0.966    no
C11 . H112 . 0.962    no
C11 . H113 . 0.976    no
C12 . C13 . 1.504(5)    yes
C13 . H131 . 0.951    no
C13 . H132 . 0.952    no
C13 . H133 . 0.947    no
loop_
 _geom_angle_atom_site_label_1
 _geom_angle_site_symmetry_1
 _geom_angle_atom_site_label_2
 _geom_angle_site_symmetry_2
 _geom_angle_atom_site_label_3
 _geom_angle_site_symmetry_3
 _geom_angle
 _geom_angle_publ_flag
O1 2_666 Pd1 . O2 2_666 94.83(9)    yes
O1 2_666 Pd1 . O1 . 179.994    yes
O2 2_666 Pd1 . O1 . 85.17(9)    yes
O1 2_666 Pd1 . O2 . 85.17(9)    yes
O2 2_666 Pd1 . O2 . 179.994    yes
O1 . Pd1 . O2 . 94.83(9)    yes
Pd1 . O1 . C1 . 122.5(2)    yes
Pd1 . O2 . C3 . 124.3(2)    yes
C5 . N1 . C8 . 122.6(3)    yes
C5 . N1 . C10 . 121.3(3)    yes
C8 . N1 . C10 . 115.7(3)    yes
O1 . C1 . C2 . 128.9(3)    yes
O1 . C1 . H11 . 115.0    no
C2 . C1 . H11 . 116.1    no
C1 . C2 . C3 . 124.9(3)    yes
C1 . C2 . C7 . 117.7(3)    yes
C3 . C2 . C7 . 117.4(3)    yes
C2 . C3 . O2 . 124.5(3)    yes
C2 . C3 . C4 . 118.1(3)    yes
O2 . C3 . C4 . 117.4(3)    yes
C3 . C4 . C5 . 123.6(3)    yes
C3 . C4 . H41 . 118.0    no
C5 . C4 . H41 . 118.4    no
C4 . C5 . N1 . 121.6(3)    yes
C4 . C5 . C6 . 117.4(3)    yes
N1 . C5 . C6 . 121.0(3)    yes
C5 . C6 . C7 . 120.2(3)    yes
C5 . C6 . H61 . 119.8    no
C7 . C6 . H61 . 120.0    no
C2 . C7 . C6 . 123.3(3)    yes
C2 . C7 . H71 . 118.1    no
C6 . C7 . H71 . 118.5    no
N1 . C8 . C9 . 113.8(3)    yes
N1 . C8 . H81 . 106.6    no
C9 . C8 . H81 . 108.7    no
N1 . C8 . H82 . 109.0    no
C9 . C8 . H82 . 109.2    no
H81 . C8 . H82 . 109.5    no
C8 . C9 . H91 . 110.5    no
C8 . C9 . H92 . 110.0    no
H91 . C9 . H92 . 108.8    no
C8 . C9 . H93 . 110.0    no
H91 . C9 . H93 . 109.4    no
H92 . C9 . H93 . 108.1    no
N1 . C10 . C11 . 113.5(3)    yes
N1 . C10 . H101 . 108.3    no
C11 . C10 . H101 . 108.5    no
N1 . C10 . H102 . 108.6    no
C11 . C10 . H102 . 109.0    no
H101 . C10 . H102 . 108.9    no
C10 . C11 . H111 . 109.9    no
C10 . C11 . H112 . 108.1    no
H111 . C11 . H112 . 107.5    no
C10 . C11 . H113 . 110.6    no
H111 . C11 . H113 . 110.5    no
H112 . C11 . H113 . 110.1    no
N2 . C12 . C13 . 150.3(18)    yes
C12 . C13 . H131 . 109.8    no
C12 . C13 . H132 . 112.3    no
H131 . C13 . H132 . 108.1    no
C12 . C13 . H133 . 111.2    no
H131 . C13 . H133 . 108.2    no
H132 . C13 . H133 . 107.2    no


_iucr_refine_instructions_details
;
#
# Punched on 14/12/21 at 09:37:12
#
#LIST     12                                                                    
BLOCK 
CONT SCALE 
CONT PD   (     1 ,X'S,U'S)  UNTIL N    (     1 ) 
CONT N    (     2 ,X'S,U[ISO]) 
CONT C    (     1 ,X'S,U'S)  UNTIL C    (    11 ) 
CONT C    (    12 ,X'S,U[ISO])  UNTIL C    (    13 ) 
RIDE C   (   1,X'S) H   (  11,X'S) 
RIDE C   (   4,X'S) H   (  41,X'S) 
RIDE C   (   6,X'S) H   (  61,X'S) 
RIDE C   (   7,X'S) H   (  71,X'S) 
RIDE C   (   8,X'S) H   (  81,X'S) H   (  82,X'S) 
RIDE C   (   9,X'S) H   (  91,X'S) H   (  92,X'S) H   (  93,X'S) 
RIDE C   (  10,X'S) H   ( 101,X'S) H   ( 102,X'S) 
RIDE C   (  11,X'S) H   ( 111,X'S) H   ( 112,X'S) H   ( 113,X'S) 
RIDE C   (  13,X'S) H   ( 131,X'S) H   ( 132,X'S) H   ( 133,X'S) 
END                                                                             
#
# Punched on 14/12/21 at 09:37:12
#
#LIST     16                                                                    
NO 
REM   HREST   START (DO NOT REMOVE THIS LINE) 
REM   HREST   END (DO NOT REMOVE THIS LINE) 
DISTANCE 1.500000 , 0.005000 = C(12) TO C(13) 
DISTANCE 1.180000 , 0.005000 = N(2) TO C(12) 
VIBRATION 0.0, 0.002000 = N(2) TO C(12) 
VIBRATION 0.0, 0.002000 = C(12) TO C(13) 
END                                                                             
;
# looking for ARCHIVE-HKL.CIF 
 
_iucr_refine_reflections_details 
; 
# An asterisk in column 34 indicates a format overflow 
# Data was input as F-squared 
  -1   0   0    0.60    0.60 
   1   0   0    2.30    0.60 
   2   0   0  715.93   21.00 
  -2   0   0  723.43   21.00 
   3   0   0    0.20    2.20 
   4   0   0 3276.57   91.59 
   5   0   0   -7.70    2.60 
   6   0   0  132.39    8.50 
   0  -1   0    0.10    0.30 
   0   1   0    0.10    0.20 
   1  -1   0 2780.32   77.19 
  -1   1   0 2842.82   77.19 
   2  -1   0  441.76   13.90 
   2  -1   0  423.96   12.90 
  -2  -1   0  438.96   12.80 
  -2   1   0  431.96   13.80 
   2   1   0  435.26   12.80 
  -3  -1   0 2612.24   72.29 
   3  -1   0 2622.94   73.49 
   3   1   0 2607.54   72.29 
   4  -1   0   14.30    3.90 
   4   1   0    8.40    2.60 
   5  -1   0  339.37   14.30 
   5   1   0  374.56   13.30 
   6  -1   0   28.70    5.70 
   6   1   0   19.80    4.50 
   7  -1   0  304.37   15.00 
   0   2   0   23.60    2.00 
   1  -2   0   67.69    3.90 
   1  -2   0   73.19    3.40 
   1  -2   0   75.99    2.20 
  -1   2   0   59.99    3.80 
   2  -2   0 3204.78   86.89 
   2  -2   0 3179.08   88.79 
   3  -2   0  190.08    6.60 
  -3  -2   0  183.18    6.20 
   3  -2   0  180.78    8.40 
   3   2   0  179.08    6.30 
   4  -2   0  368.76   14.40 
   4   2   0  378.56   12.10 
   5  -2   0    1.60    4.60 
   5   2   0    6.80    2.80 
   6  -2   0  313.47   15.00 
   7  -2   0   22.50    6.60 
   1  -3   0 2515.35   69.99 
  -1  -3   0 2487.65   68.39 
  -1   3   0 2500.55   69.39 
   2  -3   0  232.88    9.40 
   2  -3   0  221.38    6.80 
   3  -3   0 1194.08   33.00 
   3  -3   0 1155.18   36.00 
   4  -3   0   13.10    4.20 
   4   3   0   11.10    1.70 
   5  -3   0  487.35   19.50 
   6  -3   0    4.60    6.00 
   7  -3   0  187.78   13.30 
   0  -4   0 1831.62   50.69 
   0   4   0 1746.73   50.49 
   1  -4   0   -3.30    2.20 
  -1  -4   0   -2.50    1.40 
  -1   4   0    4.10    2.20 
  -1   4   0    0.60    0.70 
   2  -4   0 1264.07   38.10 
   3  -4   0  118.79    4.20 
   3  -4   0  117.89    7.80 
   4  -4   0  616.14   22.30 
   5  -4   0   29.00    6.40 
   6  -4   0  353.56   17.30 
   7  -4   0   -2.20    6.70 
   0  -5   0   -0.70    2.10 
   0   5   0    4.70    2.40 
   1  -5   0 1054.79   32.50 
  -1  -5   0 1088.29   30.90 
  -1   5   0 1051.69   31.90 
  -1   5   0 1069.89   29.40 
   2  -5   0    2.10    3.60 
   3  -5   0  519.45   19.50 
   4  -5   0   46.90    7.10 
   5  -5   0  602.34   24.10 
   6  -5   0    8.10    6.90 
   0  -6   0  691.83   21.80 
   0   6   0  648.34   21.50 
  -1  -6   0   13.80    2.90 
   1  -6   0   14.60    4.40 
  -1   6   0   17.90    3.70 
  -1   6   0   10.30    1.50 
  -1   6   0   15.40    1.60 
   2  -6   0 1132.79   35.10 
  -2  -6   0 1061.79   31.00 
   3  -6   0   41.30    6.60 
   4  -6   0  441.56   19.30 
   5  -6   0   19.70    6.60 
   6  -6   0  261.57   16.20 
   0  -7   0   -3.50    3.10 
   0   7   0   -4.10    2.10 
   0   7   0    2.30    3.60 
  -1  -7   0  621.34   19.80 
   1  -7   0  623.84   21.60 
  -1   7   0  613.54   18.70 
   1   7   0  594.54   20.90 
  -1   7   0  593.54   20.90 
   2  -7   0   88.09    8.80 
   3  -7   0  736.43   26.80 
   4  -7   0   97.19    9.90 
   5  -7   0  394.36   19.50 
   0  -8   0   88.39    7.30 
   0   8   0   94.09    7.40 
  -1  -8   0   10.80    3.80 
   1  -8   0   22.20    5.70 
  -1   8   0   10.60    4.70 
   1   8   0   21.10    5.40 
   2  -8   0  383.76   17.30 
   3  -8   0   56.69    8.30 
   4  -8   0  166.98   12.60 
   5  -8   0   26.00    8.10 
   0  -9   0   -2.40    4.40 
   0   9   0    3.50    4.60 
   1  -9   0   96.19    9.40 
  -1   9   0  105.19    8.50 
   1   9   0   97.49    8.50 
   2  -9   0   13.00    6.00 
   2   9   0   15.40    5.90 
   3  -9   0   39.70    8.30 
   4  -9   0    4.40    6.90 
   0  10   0  307.97   14.90 
   1 -10   0    3.80    5.70 
   1  10   0    1.70    5.20 
  -1  10   0    2.70    5.80 
   2 -10   0   49.00    9.00 
   2  10   0   63.79    9.00 
   6   0  -1    3.70    3.90 
   5   0  -1  535.05   18.50 
   4   0  -1   10.10    3.00 
   3   0  -1 5603.64  154.78 
  -3   0   1 5698.63  154.98 
  -2   0   1   -0.20    1.10 
   2   0  -1   -0.40    1.10 
   2   0  -1   -2.70    1.10 
   0   0  -1    0.00    0.10 
   0   0  -1    0.00    0.10 
   0   0   1    0.00    0.10 
   0   0   1    0.00    0.10 
   2   0   1   -1.00    1.00 
  -2   0  -1    0.00    1.10 
  -3   0  -1 3035.70   84.59 
   3   0   1 3046.60   84.39 
   4   0   1   -5.90    2.50 
   5   0   1  138.79    7.80 
   6   0   1    6.00    3.90 
   7  -1  -1   27.80    6.70 
   6  -1  -1  278.07   13.30 
   6   1  -1  284.47   12.20 
   5  -1  -1   -8.40    2.80 
   5   1  -1   -1.60    2.70 
   4  -1  -1 1644.74   48.50 
   4   1  -1 1663.43   47.30 
   3  -1  -1   -3.90    2.30 
   3   1  -1   -2.60    1.90 
   2  -1  -1 4799.02  131.99 
   2  -1  -1 4826.82  132.99 
  -2   1   1 4926.91  132.99 
   0  -1   1    0.30    0.10 
   1  -1   1  369.86   11.10 
  -1   1  -1  375.06   11.10 
   1   1   1  330.37    9.90 
   2  -1   1 2063.59   56.89 
  -2   1  -1 2022.30   56.79 
   2   1   1 1995.60   55.69 
   3  -1   1 2118.79   59.29 
   3   1   1 2048.79   57.99 
   4  -1   1  921.41   28.70 
   4   1   1  915.01   27.40 
   5  -1   1   16.10    4.70 
   5   1   1   19.70    3.80 
   6  -1   1  393.46   16.20 
   6   1   1  380.26   14.80 
   7  -1   1   29.70    6.60 
   7  -2  -1  393.36   17.70 
   6  -2  -1    5.20    4.70 
   5  -2  -1  311.87   14.20 
   5   2  -1  326.27   11.80 
   4  -2  -1   -0.60    3.30 
  -4  -2   1   -5.70    2.20 
   4   2  -1    5.20    2.10 
  -3  -2   1  765.92   22.20 
   3  -2  -1  795.92   22.60 
   3  -2  -1  772.32   24.50 
   3   2  -1  767.02   22.50 
   2  -2  -1  360.46   12.50 
   2  -2  -1  369.66   10.80 
  -2  -2   1  353.86   10.50 
   2   2  -1  368.66   10.60 
  -1   2   1 9999.00  271.47 
   0   2   1   26.90    2.00 
   0   2  -1   15.60    1.50 
   1  -2   1 2490.25   69.79 
   1  -2   1 2540.45   69.29 
  -1   2  -1 2516.75   69.79 
   2  -2   1  182.78    7.60 
   2  -2   1  170.58    5.80 
   2   2   1  185.08    5.20 
   3  -2   1 1625.34   45.80 
   3  -2   1 1654.83   47.90 
   3   2   1 1630.54   45.20 
   4  -2   1    1.10    3.70 
   4   2   1    7.70    2.10 
   5  -2   1  565.64   20.90 
   5   2   1  584.74   18.40 
   6  -2   1   -1.30    4.80 
   7  -2   1  272.77   14.90 
   7  -3  -1   10.30    6.10 
   6  -3  -1  345.87   16.70 
   5  -3  -1   29.00    5.80 
   4  -3  -1  698.93   23.60 
   4   3  -1  676.23   20.00 
  -3  -3   1  513.75   14.60 
   3  -3  -1  526.35   18.10 
   3  -3  -1  516.55   15.40 
  -2  -3   1 2021.60   56.39 
   2  -3  -1 2057.19   59.09 
   2  -3  -1 2126.09   56.59 
   1  -3  -1   16.20    2.70 
  -1  -3   1   17.00    1.80 
  -1   3   1   23.80    2.60 
  -1   3   1   22.80    1.20 
  -1   3   1   16.80    3.20 
   0  -3  -1   56.49    3.10 
   0  -3   1   52.99    3.20 
   0   3   1   52.59    3.00 
   0   3  -1   55.89    3.10 
   0   3   1   52.49    3.10 
  -1  -3  -1   17.70    1.60 
   1  -3   1   23.00    3.00 
  -1   3  -1   25.20    2.70 
   2  -3   1 2178.58   62.29 
   2  -3   1 2184.08   59.29 
   3  -3   1  102.49    4.10 
   3  -3   1   96.59    6.60 
   4  -3   1  745.03   24.80 
   4   3   1  705.33   20.60 
   5  -3   1   -1.30    4.40 
   6  -3   1  233.08   13.20 
   7  -3   1   10.00    6.70 
   7  -4  -1   72.99   10.00 
   6  -4  -1   26.20    7.10 
   5  -4  -1  687.33   25.30 
   4  -4  -1   33.20    5.70 
   3  -4  -1  947.71   30.60 
   3  -4  -1  967.70   26.90 
  -2  -4   1  277.67    8.20 
   2  -4  -1  279.37    7.90 
   2  -4  -1  262.37   11.20 
  -2  -4   1  270.17    8.30 
  -1  -4   1 1418.26   40.10 
   1  -4  -1 1396.56   41.50 
  -1   4   1 1438.36   41.10 
  -1   4   1 1450.55   39.10 
   0  -4  -1  565.94   17.40 
   0  -4   1  545.75   17.50 
   0   4   1  563.24   17.30 
   0   4   1  579.54   17.50 
   0   4  -1  543.55   17.30 
   1  -4   1 1804.42   52.19 
  -1  -4  -1 1817.82   50.29 
  -1   4  -1 1821.22   51.59 
   2  -4   1    1.70    3.30 
   3  -4   1  999.50   30.40 
   3  -4   1  883.51   26.00 
   4  -4   1   10.90    4.60 
   5  -4   1  311.57   15.20 
   6  -4   1    2.20    5.90 
   7  -4   1  124.69   12.50 
   6  -5  -1  251.27   15.20 
   5  -5  -1   34.80    6.90 
   4  -5  -1  555.54   21.30 
   3  -5  -1   83.19    7.40 
  -2  -5   1  787.42   22.60 
   2  -5  -1  792.72   25.90 
  -1  -5   1   72.79    4.50 
   1  -5  -1   73.99    5.90 
  -1   5   1   90.29    5.00 
  -1   5   1   82.79    3.20 
   0  -5   1  892.21   26.60 
   0  -5  -1  872.21   26.40 
   0   5  -1  861.01   25.00 
   0   5   1  894.61   26.60 
   0   5  -1  839.82   26.40 
   1  -5   1   22.80    4.00 
  -1  -5  -1   21.70    2.70 
  -1   5  -1   20.00    1.20 
  -1   5  -1   20.60    1.20 
  -1   5  -1   30.40    3.80 
  -2  -5  -1 1106.79   30.00 
   2  -5   1 1048.80   33.70 
   3  -5   1   30.50    5.60 
   4  -5   1  800.22   28.10 
   5  -5   1   11.50    6.00 
   6  -5   1  199.58   13.80 
   6  -6  -1   66.49   10.10 
   5  -6  -1  410.36   19.10 
   4  -6  -1  162.28   11.10 
   3  -6  -1 1467.65   45.80 
  -2  -6   1    0.60    1.90 
   2  -6  -1   -0.30    4.50 
   1  -6  -1  368.96   14.60 
  -1  -6   1  375.66   13.00 
  -1   6   1  382.06   11.20 
  -1   6   1  382.56   13.90 
   0  -6  -1   93.29    5.90 
   0  -6   1   94.39    6.20 
   0   6  -1   83.09    4.20 
   0   6   1   94.09    5.90 
   0   6  -1   99.79    6.00 
   0   6   1   88.09    4.50 
   1  -6   1 1368.66   41.50 
  -1  -6  -1 1339.67   39.40 
  -1   6  -1 1442.26   37.50 
  -1   6  -1 1354.26   37.40 
  -1   6  -1 1329.87   40.70 
  -2  -6  -1    1.40    1.80 
   2  -6   1    8.30    4.30 
   3  -6   1  203.28   12.10 
   4  -6   1   74.99    8.70 
   5  -6   1  510.05   22.00 
   6  -6   1   21.40    7.70 
   5  -7  -1   25.00    7.80 
   4  -7  -1  136.79   11.10 
   3  -7  -1    3.90    4.90 
   2  -7  -1  569.74   21.60 
  -2  -7   1  571.14   18.60 
  -1  -7   1    0.70    3.00 
   1  -7  -1   10.50    4.50 
   1   7  -1   10.50    4.20 
  -1   7   1    6.90    1.70 
  -1   7   1    8.30    4.00 
   0  -7  -1  404.06   15.10 
   0  -7   1  402.46   15.20 
   0   7   1  390.76   13.10 
   0   7   1  401.86   15.20 
   0   7  -1  408.16   15.20 
  -1  -7  -1   23.30    3.70 
   1  -7   1   22.70    5.30 
   1   7   1   27.00    5.00 
  -1   7  -1   28.20    4.90 
   2  -7   1  726.73   25.90 
   3  -7   1   23.50    5.80 
   4  -7   1  488.65   20.90 
   5  -7   1   32.60    8.10 
   5  -8  -1  165.88   13.70 
   4  -8  -1   14.70    6.70 
   3  -8  -1    5.20    5.90 
   2  -8  -1   13.60    5.90 
  -1  -8   1  370.86   14.30 
   1  -8  -1  385.76   16.20 
  -1   8   1  377.46   15.40 
   1   8  -1  384.26   15.60 
   0  -8   1   45.40    6.00 
   0  -8  -1   47.40    6.10 
   0   8   1   62.59    6.80 
   0   8  -1   50.09    6.50 
   0   8   1   43.70    6.20 
   1  -8   1  202.58   11.70 
  -1  -8  -1  208.58    9.70 
   1   8   1  212.98   10.90 
  -1   8  -1  215.38   11.00 
   2  -8   1   71.49    8.30 
   3  -8   1  702.43   27.00 
   4  -8   1    3.90    6.10 
   5  -8   1  249.18   16.10 
   4  -9  -1  308.57   17.50 
   3  -9  -1   13.90    6.60 
   2  -9  -1  136.49   11.20 
   2   9  -1  127.09    9.70 
   1  -9  -1   32.40    6.60 
   1   9  -1   41.10    6.80 
  -1   9   1   46.80    7.00 
   0  -9  -1  143.89    9.40 
   0  -9   1  149.69    9.80 
   0   9   1  152.48    9.70 
   0   9  -1  152.58    9.80 
   1  -9   1    3.40    5.40 
  -1   9  -1   -0.20    4.40 
   1   9   1    6.40    5.00 
   2  -9   1  125.69   11.10 
   2   9   1  120.69    9.40 
   3  -9   1   17.60    7.50 
   4  -9   1   78.39   10.90 
   2 -10  -1   -1.80    5.60 
   2  10  -1   -7.30    5.50 
   1 -10  -1   59.09    8.40 
  -1  10   1   88.69    9.50 
   1  10  -1   83.69    9.30 
   0  10  -1   48.60    7.40 
   0  10   1   37.20    7.00 
   1 -10   1  130.29   11.00 
   1  10   1  139.59   10.80 
  -1  10  -1  142.99   10.30 
   2 -10   1   15.60    7.40 
   2  10   1   18.70    6.70 
   6   0  -2  551.04   20.00 
   5   0  -2    1.20    3.10 
   4   0  -2  344.87   12.70 
  -3   0   2   -8.40    2.50 
   3   0  -2   -3.00    2.20 
   1   0  -2    3.70    1.00 
  -1   0   2    2.00    0.80 
  -1   0   2    2.20    0.70 
   1   0  -2    2.80    0.80 
   0   0   2   -0.20    0.10 
   0   0   2    0.00    0.20 
   2   0   2  188.88    6.80 
   4   0   2  703.33   22.30 
   5   0   2   -7.80    2.70 
   6   0   2  786.72   26.30 
   7  -1  -2  146.59   10.80 
   6  -1  -2   -0.90    4.10 
   6   1  -2    0.20    3.50 
   5  -1  -2  368.36   14.90 
   5   1  -2  402.96   14.20 
   4  -1  -2   68.49    5.90 
   4   1  -2   59.89    4.80 
  -3  -1   2 4771.42  130.39 
   3  -1  -2 4758.52  131.39 
   3   1  -2 4754.12  130.49 
   2  -1  -2   18.80    2.60 
   2  -1  -2   20.10    1.90 
  -2  -1   2   18.80    1.90 
   2   1  -2   22.50    2.20 
   2   1  -2   19.20    2.30 
  -2   1   2   13.20    2.40 
  -2   1   2   18.30    2.00 
  -1  -1   2 2986.80   84.89 
  -1  -1   2 2997.40   84.99 
   1  -1  -2 3144.29   85.29 
   1   1  -2 3147.59   84.99 
  -1   1   2 3275.47   85.49 
   0  -1  -2  446.86   13.60 
   0   1  -2  501.35   13.40 
   1  -1   2 4892.11  133.49 
   2  -1   2  502.75   15.70 
   2   1   2  492.75   14.60 
   3  -1   2 1808.52   51.89 
   3   1   2 1808.52   50.59 
   4  -1   2   48.90    5.20 
   4   1   2   43.10    4.10 
   5  -1   2  465.15   17.40 
   5   1   2  452.25   15.90 
   6  -1   2   16.20    5.10 
   6   1   2   17.90    6.10 
   7  -1   2  275.47   14.30 
   7  -2  -2   32.00    6.70 
   6  -2  -2  231.28   12.80 
   5  -2  -2   20.00    5.40 
   5   2  -2   24.00    3.60 
  -4  -2   2 2724.03   75.19 
   4  -2  -2 2725.33   77.59 
   4   2  -2 2673.63   75.49 
  -3  -2   2  193.68    6.90 
   3  -2  -2  205.18    7.10 
   3  -2  -2  186.68    8.80 
   3   2  -2  199.38    7.30 
  -2  -2   2 2096.29   57.19 
   2  -2  -2 2069.59   58.79 
   2  -2  -2 1993.20   57.19 
   2   2  -2 2171.38   57.19 
  -2   2   2 2054.99   57.19 
   1  -2   2   -1.40    1.50 
  -1  -2  -2    1.20    0.60 
   1  -2   2    2.80    1.20 
   1   2   2    1.00    0.60 
   2  -2   2 3761.72  104.39 
   3  -2   2  505.75   17.10 
   3   2   2  488.15   14.60 
   4  -2   2  763.72   24.90 
   4   2   2  740.93   22.20 
   5  -2   2   -4.70    4.00 
   5   2   2    0.40    2.50 
   6  -2   2  152.28   10.20 
   7  -2   2   16.10    6.50 
   7  -3  -2  284.97   15.40 
   6  -3  -2   20.90    6.10 
   5  -3  -2  550.24   20.90 
   4  -3  -2   60.49    6.30 
  -4  -3   2   40.80    3.20 
   4   3  -2   54.99    3.40 
   3  -3  -2  574.84   19.40 
   3  -3  -2  539.15   16.70 
  -3  -3   2  575.04   16.20 
   2  -3  -2  177.28    8.30 
   2  -3  -2  193.28    6.00 
  -2  -3   2  184.28    6.30 
  -2   3   2  184.18    6.10 
   1  -3  -2 2083.29   58.29 
   1  -3  -2 1995.80   56.49 
   1   3  -2 2044.10   57.39 
  -1   3   2 2099.59   57.79 
  -1   3   2 2119.09   56.59 
   0  -3  -2   62.19    3.30 
   0  -3   2   58.39    3.30 
   0   3  -2   61.69    3.30 
   0   3   2   58.49    3.30 
   0   3   2   64.99    3.30 
   0   3   2   55.99    2.90 
   0   3  -2   57.69    2.50 
   1  -3   2 1794.02   51.59 
  -1  -3  -2 1823.72   49.90 
   1   3   2 1827.32   49.80 
  -1   3  -2 1808.32   50.89 
   2  -3   2  488.45   13.90 
   2  -3   2  510.15   17.00 
   2  -3   2  493.75   13.90 
   3  -3   2  828.32   23.40 
   3  -3   2  809.12   26.40 
   4  -3   2   26.30    5.00 
   4   3   2   22.50    2.00 
   5  -3   2  587.24   22.40 
   6  -3   2    4.30    5.50 
   7  -3   2  205.28   14.00 
   7  -4  -2    1.80    6.00 
   6  -4  -2  306.77   15.90 
   5  -4  -2   65.29    8.00 
   4  -4  -2  384.86   16.00 
  -3  -4   2   44.10    2.00 
   3  -4  -2   32.20    5.30 
   3  -4  -2   43.20    2.50 
   2  -4  -2 1882.21   54.89 
  -2  -4   2 1847.02   51.99 
   2  -4  -2 1871.31   51.69 
  -2   4   2 1948.61   51.79 
   1  -4  -2   27.60    3.70 
  -1  -4   2   27.70    2.70 
  -1   4   2   24.00    1.90 
  -1   4   2   34.60    3.50 
   0  -4   2  833.12   24.50 
   0  -4  -2  820.42   24.20 
   0   4   2  801.02   24.20 
   0   4  -2  826.42   23.10 
   0   4   2  797.92   23.40 
   0   4   2  810.92   24.10 
   0   4  -2  797.82   24.20 
  -1  -4  -2   13.20    2.00 
   1  -4   2   11.10    3.30 
  -1   4  -2   15.60    2.80 
   1   4   2    6.90    1.80 
   2  -4   2 1927.11   56.19 
   3  -4   2   15.40    1.50 
   3  -4   2   17.90    4.50 
   3  -4   2   19.90    1.60 
   4  -4   2  775.72   26.80 
   5  -4   2   41.50    7.20 
   6  -4   2  258.77   14.70 
   7  -4   2    0.10    6.10 
   6  -5  -2   73.49    9.80 
   5  -5  -2  835.12   30.00 
   4  -5  -2  270.47   13.40 
   3  -5  -2 1254.97   34.00 
   3  -5  -2 1194.08   38.50 
  -2  -5   2   10.10    2.00 
   2  -5  -2    6.50    3.90 
  -1  -5   2 1410.46   40.60 
   1  -5  -2 1424.86   41.90 
  -1   5   2 1422.46   39.30 
  -1   5   2 1408.86   41.30 
   0  -5   2   92.49    5.60 
   0  -5  -2   96.69    5.30 
   0   5   2   87.19    5.20 
   0   5  -2   89.09    3.90 
   0   5   2   88.99    4.30 
   0   5  -2   90.39    5.40 
   1  -5   2 1016.10   31.60 
  -1  -5  -2 1017.00   29.60 
  -1   5  -2 1045.10   30.90 
  -2  -5  -2  113.99    3.90 
   2  -5   2  117.79    7.80 
   3  -5   2  642.94   22.90 
   4  -5   2    9.00    4.60 
   5  -5   2  295.07   15.40 
   6  -5   2   32.80    8.10 
   6  -6  -2  254.37   15.90 
   5  -6  -2   19.30    6.80 
   4  -6  -2  314.97   15.40 
   3  -6  -2  113.39    8.90 
   2  -6  -2  419.96   16.80 
  -2  -6   2  433.66   13.80 
  -2   6   2  439.96   12.20 
   1  -6  -2    9.80    4.10 
  -1  -6   2   16.90    3.10 
  -1   6   2   19.50    3.80 
  -1   6   2   16.40    1.90 
   0  -6  -2  791.92   24.40 
   0  -6   2  764.92   24.70 
   0   6   2  782.92   24.60 
   0   6  -2  784.42   22.50 
   0   6   2  765.52   23.00 
   0   6  -2  756.62   24.40 
   1  -6   2    8.70    3.70 
  -1  -6  -2    8.00    2.70 
  -1   6  -2   13.30    3.40 
  -2  -6  -2 1013.30   28.70 
   2  -6   2 1001.30   32.60 
   3  -6   2   40.20    6.60 
   4  -6   2  413.36   18.30 
   5  -6   2   23.60    7.00 
   6  -6   2  316.97   18.60 
   5  -7  -2  239.58   15.20 
   4  -7  -2   82.79    9.80 
   3  -7  -2   55.79    7.90 
   2  -7  -2    5.90    4.70 
  -2  -7   2    2.60    2.50 
   1  -7  -2  261.37   11.80 
  -1  -7   2  256.87   10.60 
  -1   7   2  238.08   11.10 
  -1   7   2  259.27    8.40 
   1   7  -2  252.37   11.30 
   0  -7   2  128.29    8.00 
   0  -7  -2  137.19    7.80 
   0   7   2  151.48    8.50 
   0   7   2  135.59    6.30 
   0   7  -2  143.69    8.10 
  -1  -7  -2  394.26   14.00 
   1  -7   2  409.46   16.40 
   1   7   2  405.06   15.40 
  -1   7  -2  406.66   15.50 
   2  -7   2   70.99    7.70 
   3  -7   2  662.63   24.90 
   4  -7   2   43.40    7.80 
   5  -7   2  242.98   15.90 
   5  -8  -2   26.20    8.50 
   4  -8  -2  160.88   13.40 
   3  -8  -2   41.90    7.70 
   2  -8  -2  300.37   14.60 
   1  -8  -2   23.30    5.20 
  -1  -8   2   16.30    4.40 
  -1   8   2   24.70    5.50 
   1   8  -2   28.60    5.70 
   0  -8   2  379.36   15.40 
   0  -8  -2  380.56   14.90 
   0   8   2  367.86   13.30 
   0   8   2  374.26   15.20 
   0   8  -2  385.46   15.40 
   1  -8   2    3.40    4.80 
  -1  -8  -2    7.10    4.10 
   1   8   2    2.60    4.70 
  -1   8  -2    0.80    4.40 
   1   8   2    4.50    3.70 
   2  -8   2  430.16   18.70 
   3  -8   2  104.79   10.00 
   4  -8   2  217.18   14.90 
   5  -8   2   46.30    9.60 
   4  -9  -2   22.90    8.00 
   3  -9  -2  196.18   13.20 
   2  -9  -2   -3.30    4.70 
   2   9  -2    0.50    5.60 
   1  -9  -2  287.27   14.40 
   1   9  -2  289.77   13.80 
  -1   9   2  299.27   14.00 
   0  -9   2   12.40    5.30 
   0  -9  -2    5.30    4.50 
   0   9  -2   13.30    5.20 
   0   9   2   19.90    5.70 
   1  -9   2  344.67   15.90 
  -1   9  -2  334.07   15.00 
   1   9   2  304.17   14.60 
   2  -9   2   44.10    8.00 
   2   9   2   46.90    7.60 
   3  -9   2  193.88   14.00 
   4  -9   2   27.40    9.10 
   2 -10  -2   79.79   10.10 
   2  10  -2  100.69   10.50 
   1 -10  -2   17.60    6.40 
  -1  10   2    9.00    5.50 
   1  10  -2   21.70    6.50 
   0  10   2  115.39    9.50 
   0  10  -2  109.49    9.40 
   1 -10   2   12.80    6.20 
   1  10   2   14.60    6.60 
  -1  10  -2    5.90    5.60 
   2 -10   2   35.20    8.30 
   2  10   2   29.70    7.50 
   7   0  -3  226.18   12.90 
   6   0  -3    4.00    4.00 
   5   0  -3  382.16   14.50 
   4   0  -3   -5.00    2.60 
   3   0  -3 3610.84  100.09 
   2   0  -3   -0.30    1.50 
  -2   0   3   -0.80    1.30 
   2   0  -3   -1.10    1.30 
  -2   0   3    0.90    1.30 
  -1   0   3 1752.82   47.70 
   1   0  -3 1691.13   48.10 
   1   0  -3 1741.93   47.70 
  -1   0   3 1715.13   48.00 
   0   0   3    1.80    0.50 
   0   0   3    1.30    0.40 
   2   0   3    1.60    1.10 
   3   0   3 1249.18   36.40 
   4   0   3   -8.10    2.50 
   5   0   3  282.87   11.90 
   6   0   3   14.90    4.50 
   7  -1  -3   -4.40    4.40 
   6  -1  -3  292.57   13.50 
   6   1  -3  305.17   12.90 
   5  -1  -3   41.90    5.70 
   5   1  -3   45.00    4.90 
   4  -1  -3 2140.09   61.29 
   4   1  -3 2107.09   60.29 
  -3  -1   3   -3.60    1.90 
   3  -1  -3    1.40    2.60 
   3   1  -3   -2.50    2.00 
   2  -1  -3  858.51   24.10 
   2  -1  -3  855.71   25.00 
  -2  -1   3  845.52   24.30 
  -2  -1   3  807.82   24.50 
  -2   1   3  851.21   24.20 
  -2   1   3  860.51   25.00 
   2   1  -3  854.41   25.40 
   2   1  -3  781.52   24.40 
   1  -1  -3  895.01   25.80 
   1  -1  -3  927.61   26.40 
  -1  -1   3  913.81   26.00 
  -1  -1   3  933.51   26.10 
   1   1  -3  966.70   26.00 
   1   1  -3  948.01   26.00 
  -1   1   3  946.01   26.40 
  -1   1   3  810.92   25.80 
   0  -1  -3 2427.36   65.39 
   0   1   3 2362.16   65.39 
   1  -1   3   15.20    1.30 
   2  -1   3    9.20    2.20 
   2   1   3    9.50    1.50 
   3  -1   3  349.67   12.70 
   3   1   3  350.56   11.50 
   4  -1   3 1248.68   37.70 
   4   1   3 1237.58   36.30 
   5  -1   3   58.49    6.80 
   5   1   3   55.09    5.40 
   6  -1   3  526.35   20.10 
   7  -1   3   12.00    5.70 
   7  -2  -3  153.08   11.00 
   6  -2  -3   33.80    6.30 
   5  -2  -3  569.54   20.70 
   5   2  -3  552.24   18.70 
  -4  -2   3  102.09    5.50 
   4   2  -3  113.09    5.90 
   3  -2  -3 3727.93   94.59 
  -3  -2   3 3410.46   93.39 
   3  -2  -3 3271.07   95.09 
   3   2  -3 3336.07   93.79 
  -3   2   3 3240.68   93.49 
   2  -2  -3   12.70    1.80 
  -2  -2   3   15.30    2.00 
   2  -2  -3   10.10    2.70 
  -2   2   3   12.90    1.80 
   2   2  -3   12.40    1.60 
   0  -2  -3 2406.26   65.39 
   0  -2   3 2436.96   64.69 
   0   2   3 2439.96   65.29 
   0   2  -3 2352.26   65.09 
   0   2  -3 2336.67   64.79 
   0   2   3 2249.87   64.99 
  -1  -2  -3 1050.69   29.20 
   1  -2   3 1056.09   28.90 
   1  -2   3 1037.90   29.80 
   1   2   3 1066.29   29.30 
   2  -2   3  374.56   13.10 
   3  -2   3 2088.69   59.99 
   3   2   3 2073.49   57.39 
   4  -2   3   53.09    5.90 
   4   2   3   42.40    3.60 
   5  -2   3  443.66   18.00 
   5   2   3  454.15   15.10 
   6  -2   3    4.80    5.20 
   7  -2   3  185.18   12.60 
   7  -3  -3   -1.50    5.30 
   6  -3  -3  360.56   16.60 
   5  -3  -3    4.20    4.50 
  -4  -3   3 1216.28   35.00 
   4  -3  -3 1247.98   38.50 
   4   3  -3 1229.78   35.30 
   3  -3  -3    3.20    1.70 
  -3  -3   3    3.70    1.50 
   3  -3  -3    2.30    3.20 
  -3   3   3    1.60    1.60 
   2  -3  -3 4057.09  113.19 
  -2  -3   3 4087.99  111.39 
   1  -3  -3 1413.96   40.90 
   1  -3  -3 1383.36   39.30 
   1   3  -3 1401.26   39.90 
  -1   3   3 1437.76   40.30 
  -1   3   3 1460.15   39.30 
   0  -3  -3 2341.67   64.79 
   0   3  -3 2489.65   64.09 
   0   3   3 2237.08   64.29 
   0   3   3 2306.47   64.69 
   0   3  -3 2250.77   64.69 
   0   3   3 2392.16   64.79 
   1  -3   3  124.49    3.50 
  -1  -3  -3  107.29    4.50 
   1  -3   3  117.19    5.80 
   1   3   3  118.79    4.20 
  -1   3  -3  115.59    3.50 
   2  -3   3 4420.76  122.99 
   3  -3   3  154.48    8.30 
   4  -3   3  802.62   26.80 
   4   3   3  787.72   22.40 
   5  -3   3   60.69    7.60 
   6  -3   3  153.68   11.10 
   7  -3   3    7.50    6.80 
   7  -4  -3  366.26   18.40 
   6  -4  -3   36.80    7.70 
   5  -4  -3  817.62   28.80 
   4  -4  -3  667.73   23.30 
  -4  -4   3  631.44   20.30 
   3  -4  -3  806.22   22.40 
  -3  -4   3  785.82   22.40 
   3  -4  -3  758.42   25.70 
  -3   4   3  752.02   22.40 
   2  -4  -3   15.30    1.70 
   2  -4  -3   12.10    3.80 
  -2  -4   3   11.60    1.70 
  -2   4   3   12.70    1.90 
   1  -4  -3 1197.18   35.90 
  -1   4   3 1217.98   35.40 
  -1   4   3 1238.88   34.00 
   0  -4  -3  217.58    8.20 
   0  -4   3  229.38    8.60 
   0   4  -3  228.28    7.20 
   0   4   3  211.48    7.70 
   0   4   3  225.88    8.40 
   0   4   3  204.78    8.10 
   0   4  -3  224.48    8.40 
   1  -4   3 2802.72   80.89 
  -1  -4  -3 2922.91   79.09 
  -1   4  -3 2861.11   80.19 
   1   4   3 2907.71   78.89 
   2  -4   3   30.70    4.70 
   3  -4   3  260.17    7.80 
   3  -4   3  253.87   11.90 
   3  -4   3  263.97    7.80 
   4  -4   3   10.10    4.50 
   4  -4   3    5.40    2.00 
   5  -4   3  564.54   22.60 
   6  -4   3   34.20    7.70 
   7  -4   3  111.39   11.20 
   6  -5  -3  367.86   18.40 
   5  -5  -3   40.90    7.40 
   4  -5  -3  339.77   15.40 
   3  -5  -3  130.29    8.90 
   3  -5  -3  133.09    5.50 
  -3  -5   3  161.88    5.70 
  -2  -5   3 1133.39   31.80 
   2  -5  -3 1089.59   34.40 
  -2   5   3 1097.79   31.20 
  -1  -5   3   72.89    4.50 
   1  -5  -3   69.69    5.40 
  -1   5   3   77.69    3.60 
  -1   5   3   75.69    4.90 
   0  -5  -3  447.56   15.10 
   0  -5   3  470.65   15.70 
   0   5  -3  467.35   13.70 
   0   5  -3  456.25   15.30 
   0   5   3  459.65   15.30 
   0   5   3  442.86   14.30 
  -1  -5  -3  117.39    5.40 
   1  -5   3  114.09    7.10 
  -1   5  -3  142.49    6.60 
   1   5   3  111.09    5.30 
  -2  -5  -3 1787.92   48.90 
   2  -5   3 1794.02   53.29 
   3  -5   3   18.40    4.80 
   4  -5   3  374.76   16.50 
   5  -5   3   23.00    6.60 
   6  -5   3  319.27   17.30 
   6  -6  -3   25.90    8.10 
   5  -6  -3  258.77   15.60 
   4  -6  -3  233.48   13.20 
   3  -6  -3  131.39   10.10 
   2  -6  -3   -9.30    3.50 
  -2  -6   3    1.30    2.20 
  -2   6   3    2.10    1.40 
   1  -6  -3  335.57   13.50 
  -1  -6   3  344.27   12.40 
  -1   6   3  342.27   12.80 
  -1   6   3  333.37   10.70 
   0  -6   3   64.99    5.80 
   0  -6  -3   64.59    5.30 
   0   6  -3   61.89    3.50 
   0   6   3   67.49    4.40 
   0   6   3   77.69    5.40 
   0   6  -3   72.69    5.30 
  -1  -6  -3  821.62   24.80 
   1  -6   3  824.72   27.00 
  -1   6  -3  832.42   26.20 
   2  -6   3   13.60    5.10 
   3  -6   3  956.10   32.20 
   4  -6   3   33.10    6.70 
   5  -6   3  436.96   20.10 
   6  -6   3   38.70    8.80 
   5  -7  -3   25.50    8.00 
   4  -7  -3  131.99   11.80 
   3  -7  -3   -9.40    5.30 
   2  -7  -3  430.56   17.70 
  -2  -7   3  418.36   14.30 
   1  -7  -3   29.30    5.30 
  -1  -7   3   23.80    4.30 
   1   7  -3   28.70    5.10 
  -1   7   3   26.10    2.80 
  -1   7   3   35.40    5.30 
   0  -7  -3  342.17   13.20 
   0  -7   3  331.77   13.60 
   0   7   3  323.17   11.60 
   0   7   3  320.07   13.00 
   0   7  -3  334.97   13.30 
  -1  -7  -3    3.60    2.80 
   1  -7   3    6.40    4.60 
  -1   7  -3    9.60    4.10 
   1   7   3    3.20    3.20 
   1   7   3   10.90    4.20 
   2  -7   3  508.75   20.20 
   3  -7   3   21.80    6.10 
   4  -7   3  262.77   14.80 
   5  -7   3   44.60    9.00 
   5  -8  -3  130.59   13.40 
   4  -8  -3   44.40    9.00 
   3  -8  -3  212.38   13.00 
   2  -8  -3    3.40    4.90 
  -1  -8   3  457.15   16.70 
   1  -8  -3  468.95   18.10 
  -1   8   3  432.06   17.30 
   1   8  -3  440.16   17.50 
   0  -8   3   14.10    4.90 
   0  -8  -3    9.60    4.10 
   0   8  -3    7.10    4.80 
   0   8   3   15.00    4.80 
   0   8   3    9.80    3.40 
   1  -8   3  339.87   15.00 
  -1   8  -3  343.87   14.70 
   1   8   3  330.17   12.90 
   1   8   3  339.97   14.50 
   2  -8   3    9.00    5.20 
   3  -8   3  202.68   13.00 
   4  -8   3   16.50    7.80 
   4  -9  -3  109.99   12.20 
   3  -9  -3   16.40    6.90 
   2  -9  -3  160.48   11.70 
   2   9  -3  155.08   10.70 
   1  -9  -3    9.50    5.20 
   1   9  -3   13.90    6.20 
  -1   9   3   11.10    5.40 
   0  -9   3  224.88   12.10 
   0  -9  -3  221.88   11.50 
   0   9   3  221.28   11.80 
   0   9  -3  232.18   12.10 
   1  -9   3    9.80    5.70 
  -1   9  -3   12.70    5.60 
   1   9   3   12.40    5.60 
   2  -9   3  346.27   16.70 
   2   9   3  318.27   15.30 
   2   9   3  344.27   14.30 
   3  -9   3   45.40    8.30 
   4  -9   3  163.78   13.40 
   2 -10  -3    9.30    6.60 
   2  10  -3    8.70    7.00 
   1 -10  -3  171.88   11.70 
  -1  10   3  160.78   10.90 
   1  10  -3  147.59   10.80 
   0  10   3   13.30    6.10 
   0  10  -3   17.50    6.10 
   1 -10   3  233.98   13.80 
   1  10   3  220.28   12.70 
  -1  10  -3  222.98   12.90 
   2 -10   3   28.20    7.90 
   2  10   3   21.30    7.00 
   7   0  -4    1.60    4.60 
   6   0  -4  124.29    8.50 
   5   0  -4   -0.90    3.00 
   4   0  -4 2436.96   69.29 
  -3   0   4   -2.40    1.80 
   3   0  -4   -2.40    2.50 
   2   0  -4 2670.63   71.49 
  -2   0   4 2611.64   71.99 
   2   0  -4 2528.75   71.99 
  -2   0   4 2532.45   71.59 
   1   0  -4    1.20    1.30 
  -1   0   4    8.30    1.60 
  -1   0   4    3.00    1.60 
   1   0  -4    2.50    1.60 
   0   0   4 3193.48   85.29 
   0   0   4 2777.92   84.79 
   0   0  -4 3375.76   84.99 
   1   0   4   -0.80    1.00 
   3   0   4   -2.50    2.10 
   4   0   4  864.01   27.00 
   6   0   4  564.54   20.70 
   7  -1  -4  219.48   13.00 
   6  -1  -4   80.69    8.10 
   6   1  -4   75.09    7.00 
   5  -1  -4  678.53   23.20 
   5   1  -4  671.03   22.30 
   4  -1  -4   35.30    5.00 
   4   1  -4   31.00    4.10 
  -3  -1   4 3029.00   83.29 
   3  -1  -4 3014.60   84.09 
  -3   1   4 3000.10   83.29 
   3   1  -4 2943.51   83.49 
  -2  -1   4  484.75   15.70 
   2  -1  -4  499.95   15.40 
   2  -1  -4  511.95   16.20 
  -2  -1   4  491.05   15.70 
  -2   1   4  527.25   15.50 
  -2   1   4  563.64   17.40 
   2   1  -4  486.05   15.90 
  -1  -1   4 1371.16   37.40 
  -1  -1   4 1287.47   37.40 
   1  -1  -4 1339.27   37.10 
   1  -1  -4 1329.97   37.90 
  -1   1   4 1369.36   37.90 
  -1   1   4 1224.68   37.10 
   1   1  -4 1349.16   37.50 
   1   1  -4 1373.06   37.30 
   0  -1  -4 1136.49   32.10 
   0  -1  -4 1104.79   32.60 
   0  -1   4 1156.28   32.10 
   0   1   4 1104.09   32.70 
   0   1   4 1129.69   32.10 
   0   1  -4 1190.78   31.60 
   0   1  -4 1224.68   32.00 
   1  -1   4  563.64   15.80 
  -1   1  -4  527.35   15.80 
   1   1   4  558.74   16.40 
   2  -1   4    7.50    2.30 
   3  -1   4 1458.15   42.80 
   3   1   4 1463.15   41.60 
   4  -1   4   -0.20    3.30 
   4   1   4    2.90    2.80 
   5  -1   4  431.76   17.10 
   5   1   4  446.76   15.70 
   6  -1   4   40.30    6.40 
   7  -1   4  322.77   17.70 
   7  -2  -4    0.30    5.90 
   6  -2  -4  588.64   22.50 
   5  -2  -4   43.10    6.30 
   5   2  -4   26.90    4.20 
   4  -2  -4  901.41   28.20 
   4   2  -4  841.12   26.60 
  -3  -2   4   -2.60    1.80 
   3  -2  -4   -0.40    3.10 
  -3   2   4    0.50    2.10 
   3   2  -4    1.00    2.00 
  -2  -2   4  767.52   24.00 
   2  -2  -4  797.22   23.40 
   2  -2  -4  827.92   24.80 
  -2  -2   4  780.22   23.80 
   2   2  -4  840.52   23.60 
  -2   2   4  825.72   23.50 
   1  -2  -4  243.48    9.10 
   1  -2  -4  260.47    8.00 
   1  -2  -4  252.27    8.20 
  -1  -2   4  247.48    8.40 
  -1   2   4  267.67    8.10 
   1   2  -4  250.67    8.30 
  -1   2   4  241.18    9.10 
   0  -2  -4 6249.47  172.58 
   0   2   4 6458.85  172.48 
   1  -2   4 2670.03   70.29 
  -1  -2  -4 2613.84   70.59 
   1  -2   4 2635.84   70.99 
   1   2   4 2481.65   70.89 
  -1   2  -4 2488.55   70.29 
   2  -2   4  280.87    8.80 
   2  -2   4  280.27   10.70 
   2   2   4  286.77    8.70 
   3  -2   4    7.90    3.50 
   3   2   4    2.80    1.70 
   4  -2   4 1095.39   34.60 
   4   2   4 1108.89   31.90 
   5  -2   4   -1.20    4.20 
   5   2   4   -3.70    2.50 
   6  -2   4  541.25   21.60 
   7  -2   4    6.40    6.10 
   7  -3  -4  271.37   15.80 
   6  -3  -4   95.39    9.90 
   5  -3  -4 1257.17   40.80 
   5   3  -4 1315.17   38.20 
   4  -3  -4   53.49    6.10 
  -4  -3   4   38.30    3.70 
   4   3  -4   44.00    3.90 
   3  -3  -4 1850.51   53.69 
   3  -3  -4 1957.00   56.09 
  -3  -3   4 1935.61   53.79 
  -3   3   4 1929.21   53.69 
   2  -3  -4   77.39    5.70 
   2  -3  -4   84.69    3.80 
  -2  -3   4   88.49    4.20 
  -2   3   4   94.69    4.20 
   1  -3  -4 9642.83  262.67 
   0  -3   4  509.45   15.00 
   0  -3  -4  533.95   16.00 
   0   3  -4  504.55   15.60 
   0   3   4  509.05   15.60 
   0   3  -4  515.35   15.20 
   0   3   4  537.25   15.90 
   0   3   4  504.15   15.40 
   1  -3   4 1281.57   37.30 
  -1  -3  -4 1226.98   35.80 
   1  -3   4 1280.27   35.00 
   1   3   4 1279.67   35.50 
  -1   3  -4 1282.67   34.90 
   2  -3   4  419.16   12.20 
   2  -3   4  426.66   15.20 
   2   3   4  424.16   12.10 
   3  -3   4 1429.06   42.20 
   3  -3   4 1406.16   38.90 
   3   3   4 1411.76   38.00 
   3   3   4 1305.87   38.10 
   4  -3   4   66.39    6.90 
   4   3   4   56.19    3.00 
   5  -3   4  457.55   18.80 
   6  -3   4    9.60    5.70 
   7  -3   4  176.78   12.50 
   7  -4  -4   68.59    9.60 
   6  -4  -4  415.36   18.90 
   5  -4  -4    9.90    5.40 
   4  -4  -4 1412.56   44.00 
   3  -4  -4  121.79    5.00 
   3  -4  -4  122.49    7.90 
  -3  -4   4  121.89    5.50 
  -3   4   4  125.49    5.20 
   2  -4  -4 3007.50   84.59 
   2  -4  -4 3063.59   81.79 
  -2  -4   4 3008.80   82.29 
  -2   4   4 2852.81   82.09 
   1  -4  -4  884.81   26.10 
   1  -4  -4  920.91   28.00 
  -1   4   4  931.31   26.10 
  -1   4   4  923.61   27.30 
   0  -4  -4 2181.18   60.39 
   0   4   4 2200.38   60.39 
   0   4   4 2074.79   60.19 
   0   4   4 2058.99   59.69 
   0   4  -4 2131.69   60.29 
   0   4  -4 2234.98   59.29 
  -1  -4  -4   27.70    3.00 
   1  -4   4   25.30    4.20 
  -1   4  -4   38.20    3.70 
   1   4   4   31.40    2.80 
  -1   4  -4   25.00    1.40 
   2  -4   4 3198.68   91.19 
   2   4   4 3231.48   87.19 
   3  -4   4   33.30    2.00 
   3  -4   4   36.10    5.40 
   3  -4   4   31.30    2.10 
   4  -4   4  500.85   15.20 
   4  -4   4  490.05   19.40 
   5  -4   4  171.38   12.10 
   6  -4   4  133.69   11.30 
   6  -5  -4   55.69    9.20 
   5  -5  -4   41.40    7.70 
   4  -5  -4   57.89    7.50 
   3  -5  -4  320.77   14.30 
  -3  -5   4  329.67   11.20 
   3  -5  -4  362.56   12.00 
  -3   5   4  329.77   10.70 
   2  -5  -4   18.40    2.10 
   2  -5  -4   19.30    4.60 
  -2   5   4   12.90    2.10 
   1  -5  -4    4.20    3.30 
  -1  -5   4   12.90    2.50 
  -1   5   4   17.40    3.20 
  -1   5   4    6.40    1.90 
   0  -5   4   49.80    4.60 
   0  -5  -4   50.89    4.10 
   0   5  -4   47.00    4.10 
   0   5   4   47.20    4.00 
   0   5  -4   44.90    2.90 
   0   5   4   41.30    3.60 
   1  -5   4 2335.77   68.79 
  -1  -5  -4 2472.85   66.99 
   1   5   4 2467.05   66.69 
  -1   5  -4 2383.46   64.99 
  -1   5  -4 2322.17   67.89 
   2  -5   4  255.57   11.90 
   3  -5   4  658.03   23.60 
   4  -5   4    6.10    4.80 
   5  -5   4  718.73   27.30 
   6  -5   4   40.70    9.20 
   6  -6  -4  186.08   14.00 
   5  -6  -4   53.89    8.90 
   4  -6  -4   39.80    7.20 
   3  -6  -4    4.30    5.00 
   2  -6  -4  681.03   23.10 
  -2  -6   4  656.03   20.30 
  -2   6   4  629.84   19.30 
   1  -6  -4   -6.50    3.10 
  -1  -6   4   -2.20    2.30 
  -1   6   4   -1.70    1.80 
  -1   6   4    5.70    3.40 
   0  -6   4  839.82   27.20 
   0  -6  -4  862.21   26.80 
   0   6   4  855.51   25.80 
   0   6   4  846.72   26.80 
   0   6  -4  867.81   27.10 
   0   6  -4  903.61   25.10 
   1  -6   4    5.80    3.70 
  -1  -6  -4    0.20    2.50 
  -1   6  -4   10.50    3.50 
   1   6   4    7.40    3.40 
   2  -6   4  547.45   20.70 
  -2  -6  -4  567.34   16.50 
   3  -6   4   24.20    5.80 
   4  -6   4  275.97   14.60 
   5  -6   4   58.99    9.70 
   6  -6   4   97.99   12.00 
   5  -7  -4  271.27   16.00 
   4  -7  -4   53.69    8.60 
   3  -7  -4  216.98   12.60 
   2  -7  -4    1.80    5.00 
  -2  -7   4    2.50    2.90 
   1  -7  -4  726.13   24.20 
  -1  -7   4  704.63   23.10 
   1   7  -4  694.83   23.70 
  -1   7   4  698.93   23.50 
  -1   7   4  704.83   21.00 
   0  -7   4   37.50    5.40 
   0  -7  -4   32.90    4.60 
   0   7   4   38.90    5.40 
   0   7   4   26.90    3.90 
   0   7  -4   26.90    5.00 
  -1  -7  -4  615.64   19.80 
   1  -7   4  647.34   22.40 
   1   7   4  625.24   21.10 
   1   7   4  574.74   19.90 
  -1   7  -4  589.74   21.10 
   2  -7   4   50.79    7.30 
   3  -7   4  256.37   13.90 
   4  -7   4    1.20    5.60 
   5  -7   4   98.79   11.70 
   5  -8  -4    2.10    7.00 
   4  -8  -4  181.48   13.10 
   3  -8  -4    6.60    5.70 
   2  -8  -4  157.68   11.10 
  -1  -8   4   51.79    6.00 
   1  -8  -4   58.59    7.00 
  -1   8   4   59.89    7.20 
   1   8  -4   67.89    7.60 
   0  -8  -4  374.76   14.80 
   0  -8   4  379.66   15.70 
   0   8   4  376.86   13.30 
   0   8   4  362.86   15.10 
   0   8  -4  376.46   15.60 
   1  -8   4   27.50    6.10 
   1   8   4   30.00    4.90 
  -1   8  -4   18.80    6.00 
   1   8   4   25.10    5.80 
   2  -8   4  263.57   14.10 
   2   8   4  287.37   12.50 
   3  -8   4    2.70    5.80 
   4  -8   4  191.08   13.70 
   4  -9  -4   12.40    7.40 
   3  -9  -4  202.38   13.90 
   2  -9  -4    5.00    5.90 
   2   9  -4    2.00    6.10 
   1  -9  -4  320.17   15.10 
   1   9  -4  321.47   14.80 
  -1   9   4  316.97   14.70 
   0  -9  -4   -1.20    6.60 
   0  -9   4    2.70    4.80 
   0   9  -4    3.40    4.90 
   0   9   4    6.70    5.20 
   1  -9   4  182.38   11.40 
  -1   9  -4  192.28   11.80 
   1   9   4  179.88   10.90 
   2  -9   4    9.00    5.80 
   2   9   4    4.20    5.70 
   2   9   4    7.70    4.90 
   3  -9   4  171.68   12.90 
   3   9   4  172.48   10.40 
   2 -10  -4  125.59   10.70 
   2  10  -4  125.99   10.70 
   1 -10  -4    1.60    7.20 
   1  10  -4    4.90    5.60 
  -1  10   4    7.80    6.30 
   0  10  -4  128.09   10.20 
   0  10   4  140.99   10.30 
   1 -10   4    7.80    6.60 
   1  10   4    7.30    6.00 
  -1  10  -4   13.30    5.80 
   2 -10   4  242.98   15.50 
   2  10   4  223.98   13.40 
   7   0  -5  416.56   18.00 
   6   0  -5    5.70    4.40 
   5   0  -5  591.34   20.60 
   4   0  -5   -0.40    3.00 
  -3   0   5 2982.00   83.49 
   3   0  -5 3001.30   83.89 
  -2   0   5    1.20    1.40 
  -2   0   5   -0.10    1.70 
   2   0  -5    2.30    1.90 
   1   0  -5 2196.28   59.69 
  -1   0   5 2125.69   59.69 
  -1   0   5 2000.80   58.89 
   1   0  -5 2177.58   58.99 
   0   0  -5    6.80    1.40 
   0   0   5    6.90    1.40 
   0   0   5    7.70    1.50 
   1   0   5 1246.08   34.50 
  -1   0  -5 1201.78   34.40 
   3   0   5  973.00   29.20 
   4   0   5   -5.00    3.00 
   5   0   5  643.54   22.00 
   6   0   5    7.50    4.20 
   7  -1  -5   19.00    6.40 
   6  -1  -5  466.05   18.50 
   6   1  -5  440.36   17.30 
   5  -1  -5   29.30    5.30 
   5   1  -5   19.10    4.10 
   4  -1  -5 1163.88   35.50 
   4   1  -5 1149.58   34.90 
   3  -1  -5   67.29    5.10 
  -3  -1   5   68.89    4.40 
  -3   1   5   63.79    4.10 
   3   1  -5   52.59    4.70 
  -2  -1   5 3170.08   87.39 
  -2  -1   5 3199.88   87.69 
   2  -1  -5 3269.77   87.99 
   2  -1  -5 2992.30   86.99 
   2   1  -5 3127.09   87.69 
  -2   1   5 3173.68   87.09 
  -1  -1   5  861.31   25.80 
  -1  -1   5  916.31   25.70 
   1  -1  -5  860.11   26.30 
   1  -1  -5  932.71   25.50 
  -1   1   5  878.61   25.50 
  -1   1   5  911.21   26.30 
   1   1  -5  892.11   25.90 
   1   1  -5  855.71   25.60 
   0  -1  -5 1159.78   32.70 
   0  -1  -5 1158.38   33.30 
   0  -1   5 1175.88   32.60 
   0   1  -5 1175.48   31.90 
   0   1   5 1126.39   32.60 
   0   1   5 1121.29   33.30 
   0   1  -5 1220.68   32.60 
   1  -1   5 1176.38   33.30 
   1   1   5 1180.88   33.80 
  -1   1  -5 1181.28   33.30 
   1   1   5 1223.78   33.60 
   2  -1   5 1689.33   47.30 
   3  -1   5   61.79    5.40 
   3   1   5   62.99    4.20 
   4  -1   5 1266.77   39.40 
   4   1   5 1330.97   38.30 
   5  -1   5   -0.10    4.10 
   5   1   5    4.30    3.50 
   6  -1   5  513.85   20.10 
   7  -2  -5  254.57   14.80 
   6  -2  -5   71.39    8.00 
   5  -2  -5 1080.39   34.10 
   5   2  -5 1021.70   32.40 
   4  -2  -5   52.19    5.80 
  -4   2   5   47.90    4.40 
   4   2  -5   53.49    5.00 
   3  -2  -5 2786.22   79.39 
  -3  -2   5 2805.82   78.09 
  -3   2   5 2832.02   77.89 
   3   2  -5 2762.72   78.19 
   2  -2  -5   45.30    4.20 
   2  -2  -5   55.89    3.20 
  -2  -2   5   54.29    3.70 
  -2  -2   5   52.29    3.60 
  -2   2   5   55.49    3.40 
   2   2  -5   53.49    3.40 
   1  -2  -5 1162.68   32.70 
   1  -2  -5 1152.78   32.70 
  -1  -2   5 1149.39   33.10 
  -1  -2   5 1169.98   33.00 
   1  -2  -5 1133.09   33.80 
  -1   2   5 1168.18   33.70 
   1   2  -5 1146.79   33.00 
  -1   2   5 1189.78   32.80 
   0  -2   5   12.20    1.80 
   0  -2  -5    8.60    2.00 
   0  -2  -5   12.60    1.70 
   0   2  -5   11.40    1.60 
   0   2  -5   12.40    1.50 
   0   2   5   11.50    1.70 
   0   2   5   13.20    1.60 
   0   2   5   10.10    2.00 
   1  -2   5 2033.50   54.59 
   1  -2   5 2026.70   54.99 
   1   2   5 1961.40   55.59 
  -1   2  -5 1984.50   54.59 
   1   2   5 1925.71   55.39 
   2  -2   5   33.50    3.90 
   2  -2   5   34.80    2.40 
   2   2   5   39.00    2.40 
   3  -2   5 1544.45   46.20 
   3  -2   5 1541.25   44.10 
   3   2   5 1588.64   43.90 
   4  -2   5  237.58   11.30 
   4   2   5  230.88    8.80 
   5  -2   5  345.47   15.60 
   5   2   5  357.76   15.50 
   6  -2   5  163.28   11.40 
   7  -2   5  296.97   15.30 
   7  -3  -5   85.39   10.40 
   6  -3  -5  483.05   20.20 
   5  -3  -5   44.50    6.60 
   5   3  -5   36.70    4.40 
   4  -3  -5 2250.47   65.09 
  -4  -3   5 2313.17   63.39 
   4   3  -5 2166.98   62.49 
  -4   3   5 2118.69   62.39 
   3  -3  -5  193.38    9.50 
  -3  -3   5  200.88    8.10 
  -3   3   5  205.38    7.80 
  -2  -3   5  615.34   18.90 
   2  -3  -5  650.23   18.60 
   2  -3  -5  617.74   20.40 
  -2   3   5  613.34   18.80 
   1  -3  -5    9.50    2.90 
  -1  -3   5   13.20    2.20 
   1  -3  -5   16.70    2.00 
   1   3  -5   11.10    2.50 
  -1   3   5   15.70    2.30 
  -1   3   5   17.00    2.00 
   0  -3   5 1430.46   38.70 
   0  -3  -5 1413.86   39.80 
   0   3  -5 1367.56   39.10 
   0   3   5 1397.66   39.10 
   0   3   5 1424.06   39.50 
   0   3  -5 1299.87   38.80 
   0   3   5 1367.66   39.10 
  -1  -3  -5  288.07    9.40 
   1  -3   5  252.77    8.50 
   1   3   5  272.47    9.80 
  -1   3  -5  288.67    8.40 
   1   3   5  288.67    9.10 
   2  -3   5  711.23   23.20 
   2  -3   5  724.93   20.40 
   2   3   5  714.93   20.70 
   3  -3   5    4.10    3.30 
   3  -3   5   -1.70    1.60 
   3   3   5   -0.60    1.10 
   3   3   5   -0.40    1.20 
   4  -3   5  871.41   29.40 
   4  -3   5  882.91   26.10 
   4   3   5  881.41   25.20 
   5  -3   5   25.70    6.00 
   6  -3   5  278.97   14.80 
   7  -3   5   11.90    7.00 
   7  -4  -5  174.58   13.10 
   6  -4  -5   31.40    7.80 
   5  -4  -5  169.38   11.10 
   4  -4  -5  243.38   12.00 
  -4   4   5  215.38    8.60 
   3  -4  -5  644.04   22.70 
  -3  -4   5  671.43   20.60 
  -3   4   5  678.43   20.10 
  -2  -4   5 1653.03   46.30 
   2  -4  -5 1718.53   45.80 
   2  -4  -5 1631.84   48.30 
  -2   4   5 1537.25   46.00 
   1  -4  -5 3832.12  107.09 
   1  -4  -5 3956.60  108.79 
  -1   4   5 3824.42  107.89 
  -1   4   5 4020.70  107.09 
   0  -4   5   13.20    1.80 
   0  -4  -5    8.50    2.50 
   0   4  -5   12.60    2.60 
   0   4  -5    7.10    1.90 
   0   4   5    9.10    2.50 
   0   4   5    8.80    2.20 
  -1  -4  -5 2265.37   67.19 
   1  -4   5 2454.75   65.69 
   1  -4   5 2400.36   68.69 
   1   4   5 2451.25   66.69 
  -1   4  -5 2433.96   67.69 
  -1   4  -5 2454.45   65.69 
   1   4   5 2389.66   67.59 
   2  -4   5    3.10    1.10 
   2  -4   5    8.20    3.90 
   2   4   5   -0.60    1.30 
   3  -4   5 1378.66   38.10 
   3  -4   5 1368.76   42.60 
   4  -4   5   85.29    4.70 
   4  -4   5   93.49    8.70 
   5  -4   5  964.40   33.80 
   6  -4   5   52.39    8.70 
   6  -5  -5  232.88   14.60 
   5  -5  -5   14.80    6.20 
   4  -5  -5  121.49    9.40 
   3  -5  -5   -8.30    3.50 
  -3  -5   5    6.60    2.20 
  -3   5   5    2.00    1.80 
   2  -5  -5 2151.08   62.59 
   2  -5  -5 2252.67   59.59 
  -2   5   5 2028.90   59.69 
   1  -5  -5  299.97   11.80 
  -1   5   5  289.47    9.90 
  -1   5   5  296.07   11.10 
   0  -5   5  765.12   24.30 
   0  -5  -5  793.12   23.90 
   0   5  -5  773.52   22.50 
   0   5   5  759.22   23.00 
   0   5   5  754.72   23.60 
   0   5  -5  751.22   23.70 
  -1  -5  -5   69.09    4.80 
   1  -5   5   63.29    5.90 
  -1   5  -5   75.19    5.10 
  -1   5  -5   61.09    2.60 
   1   5   5   78.89    5.00 
   2  -5   5 1865.01   55.49 
   2   5   5 1858.01   51.19 
   3  -5   5    6.40    4.40 
   4  -5   5  205.88   12.00 
   5  -5   5   18.10    7.10 
   6  -5   5  181.78   13.70 
   6  -6  -5   -2.80    7.30 
   5  -6  -5  322.47   16.80 
   4  -6  -5   24.30    6.60 
   3  -6  -5  247.88   12.90 
  -3   6   5  256.27    9.20 
   2  -6  -5  256.77   12.00 
  -2  -6   5  254.07    9.80 
  -2   6   5  238.58    8.80 
  -1  -6   5  578.84   19.10 
   1  -6  -5  580.14   20.00 
  -1   6   5  582.34   17.60 
   1   6  -5  576.04   19.40 
  -1   6   5  563.34   19.30 
   0  -6  -5    9.70    3.10 
   0  -6   5   10.90    3.80 
   0   6   5    6.80    2.70 
   0   6  -5    4.90    2.20 
   0   6  -5    9.00    3.30 
   0   6   5    9.20    3.40 
  -1  -6  -5  838.42   25.20 
   1  -6   5  807.72   27.00 
  -1   6  -5  809.62   26.00 
  -1   6  -5  793.62   22.50 
   1   6   5  838.22   25.50 
  -2  -6  -5    1.80    1.50 
   2  -6   5    4.60    5.00 
   3  -6   5  398.56   17.30 
   4  -6   5    9.00    5.70 
   5  -6   5   37.30    8.40 
   6  -6   5   62.89   10.80 
   5  -7  -5   40.60    8.70 
   4  -7  -5  217.38   13.50 
   3  -7  -5   24.60    6.40 
   2  -7  -5  323.67   14.80 
  -2  -7   5  297.87   11.90 
   1  -7  -5   84.89    7.30 
  -1  -7   5   92.19    7.00 
   1   7  -5   87.29    7.10 
  -1   7   5   82.19    4.70 
  -1   7   5   90.19    6.90 
   0  -7  -5  556.84   19.20 
   0  -7   5  559.14   20.10 
   0   7  -5  566.94   19.60 
   0   7   5  559.84   18.00 
   0   7   5  539.55   19.20 
  -1  -7  -5   25.50    4.20 
   1  -7   5   32.90    5.60 
   1   7   5   29.90    5.30 
   1   7   5   29.70    4.90 
  -1   7  -5   36.00    5.70 
   2  -7   5  333.77   15.60 
   2   7   5  355.76   14.10 
   3  -7   5   -2.30    4.90 
   4  -7   5  200.08   13.20 
   5  -7   5    8.10    7.90 
   5  -8  -5  163.98   13.60 
   4  -8  -5   16.30    7.10 
   3  -8  -5  212.28   13.00 
   2  -8  -5    6.10    5.70 
  -1  -8   5  428.86   16.60 
   1  -8  -5  452.25   17.70 
   1   8  -5  430.66   17.30 
  -1   8   5  438.86   17.10 
   0  -8   5   10.20    4.80 
   0   8  -5    9.60    4.80 
   0   8   5   24.50    5.30 
   0   8   5    7.10    3.50 
   1  -8   5  356.26   15.90 
   1   8   5  385.26   15.20 
   1   8   5  372.46   14.20 
  -1   8  -5  323.67   14.90 
   2  -8   5    5.00    5.30 
   2   8   5    1.60    4.10 
   3  -8   5  162.58   12.70 
   4  -8   5   27.30    8.10 
   4  -9  -5  202.78   14.40 
   3  -9  -5   15.80    6.60 
   2  -9  -5  130.99   10.40 
   2   9  -5  138.89   10.30 
   1  -9  -5   17.50    5.80 
   1   9  -5   28.50    6.20 
  -1   9   5   15.00    5.50 
   0  -9   5  267.07   13.60 
   0   9   5  270.47   13.30 
   0   9  -5  288.77   14.00 
   1  -9   5    5.60    5.60 
   1   9   5   -1.80    4.70 
   1   9   5    3.20    6.20 
  -1   9  -5    6.60    5.00 
   2  -9   5  133.99   10.90 
   2   9   5  131.69    9.10 
   2   9   5  135.99   10.00 
   3  -9   5   18.10    7.30 
   3   9   5   20.90    5.90 
   2 -10  -5    5.40    6.20 
   2  10  -5    5.10    6.30 
   1  10  -5  172.38   11.40 
  -1  10   5  156.58   10.90 
   0  10   5    7.90    5.80 
   0  10  -5   -0.50    5.90 
   1 -10   5  101.59   11.10 
   1  10   5  100.29   10.20 
  -1  10  -5   98.39   10.40 
   2 -10   5   16.90    7.50 
   2  10   5    8.00    7.20 
   7   0  -6   10.70    5.30 
   6   0  -6  355.36   15.50 
   5   0  -6    5.40    3.80 
   4   0  -6 1735.73   49.60 
  -4   0   6 1615.84   48.90 
   3   0  -6    4.60    3.00 
  -3   0   6   -0.10    2.10 
   2   0  -6  198.78    8.30 
  -2   0   6  204.98    7.70 
  -1   0   6    1.70    1.40 
   1   0  -6    6.70    1.60 
   1   0  -6    2.30    1.60 
  -1   0   6    2.40    1.60 
  -1   0  -6    1.60    1.10 
   1   0   6    1.70    1.20 
   2   0   6  665.03   20.20 
   4   0   6 1887.21   54.89 
   6   0   6  352.26   14.90 
   7  -1  -6  420.56   18.80 
   6  -1  -6   15.80    5.20 
   6   1  -6   14.60    4.40 
   5  -1  -6 1221.28   37.60 
   5   1  -6 1153.88   36.70 
   4  -1  -6   18.60    4.10 
  -4   1   6   14.00    3.50 
   4   1  -6   12.90    3.70 
  -3  -1   6 2235.38   63.89 
   3  -1  -6 2340.07   64.69 
  -3   1   6 2268.47   63.49 
   3   1  -6 2157.98   64.09 
  -2  -1   6  175.78    7.40 
   2  -1  -6  171.48    7.60 
  -2  -1   6  177.48    7.00 
   2   1  -6  164.88    7.20 
  -2   1   6  174.48    6.90 
  -1  -1   6 1058.99   30.20 
  -1  -1   6 1001.90   29.90 
   1  -1  -6 1070.19   29.70 
   1  -1  -6 1011.00   30.80 
  -1   1   6 1028.70   30.70 
  -1   1   6 1042.10   29.80 
   1   1  -6 1007.80   29.90 
   1   1  -6 1076.09   30.30 
   0  -1  -6    2.90    1.40 
   0  -1  -6    5.60    1.30 
   0  -1   6    5.40    1.50 
   0   1   6    3.80    1.40 
   0   1   6    6.00    1.70 
   0   1  -6    4.90    0.80 
   0   1  -6    2.30    1.30 
   1  -1   6  387.46   11.90 
  -1   1  -6  372.96   11.80 
   1   1   6  393.56   12.30 
   1   1   6  401.46   12.50 
   2  -1   6    3.00    1.70 
   2   1   6   -3.90    2.40 
   3  -1   6 2248.38   64.89 
   3  -1   6 2282.37   63.79 
   4  -1   6   64.89    6.20 
   4   1   6   62.79    5.20 
   5  -1   6  261.27   12.70 
   5   1   6  268.47   11.10 
   6  -1   6   35.90    6.30 
   7  -2  -6   88.69   10.10 
   6  -2  -6  494.15   20.10 
   6   2  -6  479.65   20.60 
   5  -2  -6  158.88    9.70 
   5   2  -6  139.29    8.00 
   4  -2  -6 1823.72   54.79 
  -4   2   6 1868.61   53.29 
   4   2  -6 1857.91   53.69 
  -3  -2   6   10.10    2.70 
   3  -2  -6    4.80    3.20 
   3   2  -6    9.10    2.60 
  -3   2   6    7.20    2.60 
  -2  -2   6 2704.83   78.19 
   2  -2  -6 2847.11   79.09 
  -2  -2   6 2846.62   78.29 
   2   2  -6 2906.51   78.19 
  -2   2   6 2710.13   77.79 
   1  -2  -6   55.99    4.30 
  -1  -2   6   63.59    3.50 
   1  -2  -6   64.19    3.20 
   1  -2  -6   58.99    3.00 
  -1  -2   6   64.79    3.60 
   1   2  -6   61.79    3.60 
  -1   2   6   60.79    3.20 
   0  -2  -6 3845.02  104.89 
   0  -2   6 3420.36  104.49 
   0  -2  -6 3661.03  105.59 
   0   2   6 3845.02  104.09 
   0   2  -6 3920.61  104.19 
   0   2  -6 4056.79  104.59 
   0   2   6 3800.32  104.69 
   0   2   6 4008.10  105.59 
   1  -2   6  109.39    4.30 
   1  -2   6  114.69    4.30 
   1   2   6  102.99    4.90 
   1   2   6  106.99    5.10 
  -1   2  -6  116.69    4.30 
   2  -2   6 1129.79   32.30 
   2   2   6 1148.69   32.50 
   3  -2   6   27.60    4.40 
   3  -2   6   31.50    3.30 
   4  -2   6 1088.09   32.40 
   4  -2   6 1076.49   34.60 
   4   2   6 1102.69   32.10 
   5  -2   6   16.10    5.70 
   6  -2   6  323.77   15.90 
   7  -2   6   10.60    6.40 
   7  -3  -6  223.58   14.70 
   6  -3  -6   19.10    6.10 
   5  -3  -6  105.99    8.90 
   5   3  -6  110.19    6.50 
   4  -3  -6   82.59    7.20 
  -4   3   6   71.89    5.00 
   4   3  -6   62.29    4.90 
  -3  -3   6 1131.39   32.70 
   3  -3  -6 1031.10   33.10 
  -3   3   6 1015.70   31.00 
  -2  -3   6  101.99    5.30 
   2  -3  -6   85.99    6.00 
  -2  -3   6   96.39    4.80 
  -2   3   6   94.29    4.70 
  -1  -3   6  337.37   11.20 
   1  -3  -6  326.57   12.20 
   1  -3  -6  332.47   10.90 
  -1   3   6  345.77   10.90 
  -1   3   6  351.86   11.20 
   0  -3   6   26.10    2.50 
   0  -3  -6   29.30    3.50 
   0   3  -6   26.90    2.50 
   0   3   6   21.30    2.90 
   0   3   6   28.70    2.70 
   0   3   6   23.50    2.70 
   0   3  -6   37.20    2.70 
  -1  -3  -6 2794.52   74.99 
   1  -3   6 2531.25   74.09 
  -1   3  -6 2704.73   73.99 
   1   3   6 2674.53   75.39 
   1   3   6 2802.72   74.89 
   2  -3   6  513.15   14.80 
   2  -3   6  513.65   17.70 
   2   3   6  473.95   15.30 
   3  -3   6  971.80   27.60 
   3  -3   6  962.40   30.70 
   3   3   6  927.11   27.40 
   4  -3   6  107.09    8.30 
   4  -3   6  102.69    5.50 
   4   3   6   97.19    4.80 
   5  -3   6 1474.95   43.50 
   5  -3   6 1509.05   47.30 
   6  -3   6   11.40    5.80 
   7  -3   6  146.09   13.00 
   7  -4  -6   -2.10    5.80 
   6  -4  -6  323.67   16.60 
   5  -4  -6   95.19    9.00 
   4  -4  -6  298.97   13.90 
  -4   4   6  308.07   11.10 
   3  -4  -6   61.49    6.80 
  -3  -4   6   69.09    5.10 
  -3   4   6   60.19    4.20 
   2  -4  -6  628.34   20.90 
  -2   4   6  593.04   18.60 
  -1  -4   6  531.65   17.00 
   1  -4  -6  542.45   18.30 
  -1   4   6  555.44   16.70 
  -1   4   6  556.14   17.40 
   0  -4  -6 1221.68   35.30 
   0  -4   6 1206.98   33.70 
   0   4   6 1187.68   34.30 
   0   4  -6 1161.28   34.00 
   0   4  -6 1213.18   34.60 
   0   4   6 1159.88   34.40 
   1  -4   6  248.68    7.60 
  -1  -4  -6  214.78    8.90 
   1   4   6  246.58    9.50 
  -1   4  -6  243.58    7.50 
   1   4   6  231.08    8.40 
   2  -4   6 1731.33   49.30 
   2  -4   6 1825.72   53.19 
   2   4   6 1815.12   49.60 
   3  -4   6  123.89    8.40 
   3  -4   6  126.89    4.80 
   4  -4   6  330.77   15.50 
   5  -4   6   53.89    8.40 
   6  -4   6  340.97   18.30 
   6  -5  -6    1.20    6.40 
   5  -5  -6  752.52   27.90 
   4  -5  -6    5.40    5.50 
  -4   5   6   10.90    2.80 
   3  -5  -6  772.72   26.70 
  -3   5   6  778.82   23.40 
   2  -5  -6  178.78    9.50 
  -2   5   6  170.38    6.90 
   1  -5  -6 3286.47   91.89 
  -1   5   6 3268.17   89.79 
  -1   5   6 3204.78   90.89 
   0  -5  -6   23.20    3.70 
   0   5  -6   19.60    3.40 
   0   5   6   24.10    3.30 
   0   5   6   19.90    3.60 
   0   5  -6   23.10    2.80 
  -1  -5  -6 1509.75   45.10 
   1  -5   6 1554.64   46.70 
   1   5   6 1589.44   44.40 
  -1   5  -6 1588.34   42.90 
   1   5   6 1554.64   45.20 
  -1   5  -6 1554.64   45.40 
   2  -5   6  279.27   12.60 
   2   5   6  256.37   10.90 
   2   5   6  260.97    8.60 
   3  -5   6  469.15   18.70 
   4  -5   6   26.30    6.20 
   5  -5   6   42.60    8.40 
   6  -5   6   20.30    8.10 
   6  -6  -6  170.78   14.50 
   5  -6  -6   25.30    7.40 
   4  -6  -6  107.99    9.60 
   3  -6  -6  117.49    9.10 
  -3   6   6  108.59    5.40 
   2  -6  -6 1751.92   50.79 
  -2   6   6 1590.54   47.20 
   1  -6  -6   37.90    5.20 
  -1   6   6   38.40    4.90 
  -1   6   6   28.00    3.50 
   1   6  -6   37.20    5.00 
   0  -6   6  546.35   19.10 
   0  -6  -6  537.65   18.30 
   0   6  -6  515.35   16.70 
   0   6  -6  546.75   18.40 
   0   6   6  532.05   17.30 
   0   6   6  557.74   18.40 
   1  -6   6   45.10    6.10 
  -1  -6  -6   37.40    4.50 
   1   6   6   58.69    5.40 
  -1   6  -6   46.60    5.30 
  -1   6  -6   35.30    3.10 
   2  -6   6  804.52   28.10 
  -2  -6  -6  849.91   24.70 
   2   6   6  797.32   26.30 
   3  -6   6    3.70    4.90 
   4  -6   6  126.69   10.40 
   5  -6   6    0.20    6.40 
   5  -7  -6  128.59   12.00 
   4  -7  -6   31.00    7.80 
   3  -7  -6  268.17   14.50 
   2  -7  -6  196.68   11.70 
  -2  -7   6  193.18    9.10 
  -1  -7   6  325.47   13.10 
   1  -7  -6  305.17   13.70 
  -1   7   6  321.37   13.40 
   1   7  -6  319.67   13.60 
  -1   7   6  313.47   11.10 
   0  -7  -6   13.10    4.10 
   0  -7   6    9.30    4.40 
   0   7   6   12.60    3.60 
   0   7   6   14.20    4.40 
   0   7  -6   11.80    4.20 
  -1  -7  -6  594.04   20.10 
   1  -7   6  621.14   22.40 
  -1   7  -6  575.54   20.80 
   1   7   6  606.04   20.80 
   1   7   6  593.04   19.90 
   2  -7   6   21.90    6.40 
   2   7   6   25.00    5.20 
   3  -7   6  198.68   12.50 
   4  -7   6   17.20    6.60 
   5  -7   6  204.38   14.50 
   5  -8  -6   18.60    8.10 
   4  -8  -6  231.28   14.60 
   3  -8  -6   28.60    7.00 
   2  -8  -6  251.17   13.80 
  -1  -8   6    0.80    4.20 
   1  -8  -6    3.00    4.10 
   1   8  -6   11.20    4.90 
  -1   8   6   12.30    4.90 
   0  -8   6  464.55   18.20 
   0  -8  -6  460.35   17.40 
   0   8  -6  450.85   17.70 
   0   8   6  449.06   15.70 
   0   8   6  442.76   17.30 
   1  -8   6   11.70    5.50 
   1   8   6   12.70    5.00 
  -1   8  -6    2.40    4.40 
   1   8   6   10.60    4.30 
   2  -8   6  193.08   12.10 
   2   8   6  179.78   10.30 
   3  -8   6    6.50    5.80 
   3   8   6    6.90    5.60 
   4  -8   6  140.19   12.30 
   4  -9  -6   36.10    8.70 
   3  -9  -6  167.48   13.10 
   2  -9  -6    5.50    6.00 
   2   9  -6   -6.60    5.80 
   1  -9  -6  225.98   12.80 
  -1   9   6  236.48   12.80 
   1   9  -6  223.38   12.30 
   0  -9   6    7.00    5.20 
   0   9   6    4.60    4.80 
   0   9  -6    8.00    5.00 
   1  -9   6  167.08   11.80 
   1   9   6  186.28   11.00 
  -1   9  -6  182.88   11.10 
   1   9   6  162.48   10.40 
   2  -9   6    7.00    5.70 
   2   9   6   11.80    6.10 
   2   9   6   33.40    6.30 
   3  -9   6  140.59   13.40 
   3   9   6  158.38   10.30 
   2 -10  -6  109.99   10.40 
   2  10  -6  119.49   10.60 
  -1  10   6   26.00    6.80 
   1  10  -6   23.80    7.10 
   0  10   6  180.08   11.30 
   0  10  -6  179.38   11.80 
   1 -10   6    8.40    6.60 
   1  10   6   16.90    6.20 
   7   0  -7  369.96   17.30 
   6   0  -7   11.70    5.00 
   5   0  -7 1269.77   39.70 
  -4   0   7    7.10    3.10 
   4   0  -7    4.10    3.30 
  -3   0   7 1899.21   53.09 
   3   0  -7 1793.52   53.69 
  -2   0   7    2.90    1.80 
   2   0  -7   -0.30    1.90 
  -1   0   7 3871.41  106.29 
   1   0  -7 3855.61  105.39 
  -1   0   7 3675.73  104.59 
   0   0   7    1.40    1.20 
   0   0  -7    1.70    1.10 
   1   0   7  233.18    8.00 
   2   0   7   -2.00    1.80 
   3   0   7 4977.70  137.39 
   4   0   7    0.80    3.60 
   5   0   7   85.39    7.80 
   6   0   7    7.30    4.60 
   7  -1  -7   26.70    6.30 
   6  -1  -7  638.74   23.40 
   6   1  -7  580.44   22.10 
   5  -1  -7  360.36   15.30 
   5   1  -7  343.27   14.40 
  -4  -1   7 2227.38   63.69 
   4  -1  -7 2205.38   64.19 
   4   1  -7 2125.09   63.69 
  -4   1   7 2249.87   63.29 
  -3  -1   7   62.89    4.60 
   3  -1  -7   51.89    5.00 
  -3   1   7   55.29    4.40 
   3   1  -7   55.69    4.90 
   2  -1  -7 1823.82   51.39 
  -2  -1   7 1781.32   50.19 
  -2   1   7 1709.03   49.99 
   2   1  -7 1739.53   50.69 
   1  -1  -7  545.35   17.80 
  -1  -1   7  532.65   16.80 
  -1  -1   7  523.85   17.50 
  -1   1   7  567.84   16.70 
   0  -1  -7 1632.64   46.30 
   0  -1   7 1649.63   45.40 
   0   1   7 1582.84   45.40 
   0   1   7 1592.64   46.30 
   0   1  -7 1653.63   45.40 
   0   1   7 1620.34   44.30 
   1  -1   7    3.50    1.40 
   1   1   7    3.50    1.40 
  -1   1  -7    5.60    1.60 
   1   1   7    3.20    1.70 
   2  -1   7  961.70   28.70 
   2   1   7 1016.70   29.50 
   3  -1   7   83.39    6.30 
   3  -1   7   68.49    4.70 
   4  -1   7 1326.57   39.50 
   4  -1   7 1302.67   40.80 
   4   1   7 1359.26   39.60 
   5  -1   7    3.20    4.20 
   5   1   7    6.70    3.50 
   6  -1   7  326.97   15.30 
   7  -2  -7  307.57   16.00 
   6  -2  -7   14.30    5.60 
   6   2  -7    7.20    3.90 
   5  -2  -7  422.06   17.40 
   5   2  -7  433.96   16.20 
   4  -2  -7   45.20    5.90 
  -4   2   7   40.40    4.60 
  -3  -2   7  505.65   17.40 
   3  -2  -7  525.85   18.40 
   3   2  -7  538.15   17.50 
  -3   2   7  499.05   16.70 
   2  -2  -7  169.08    8.20 
  -2  -2   7  185.68    7.40 
  -2   2   7  166.48    7.20 
  -1  -2   7 1497.95   42.90 
   1  -2  -7 1490.25   42.10 
   1  -2  -7 1475.05   44.10 
  -1   2   7 1569.04   42.70 
   0  -2  -7   83.89    5.00 
   0  -2   7   81.79    4.10 
   0   2   7   91.19    4.20 
   0   2   7   88.09    3.50 
   0   2  -7   86.79    3.50 
   0   2   7   85.39    5.00 
   0   2  -7   89.19    4.00 
   1  -2   7 4176.78  113.99 
   1  -2   7 4316.17  114.09 
   1   2   7 4070.39  114.99 
   1   2   7 4137.29  115.09 
  -1   2  -7 4172.98  114.09 
   2  -2   7  424.56   13.40 
   2   2   7  426.16   13.70 
   2   2   7  448.66   15.00 
   3  -2   7 1105.79   31.90 
   3  -2   7 1078.29   34.10 
   4  -2   7  255.17   10.50 
   4  -2   7  267.87   13.00 
   4   2   7  275.57   10.40 
   5  -2   7 1110.69   36.60 
   5  -2   7 1130.89   34.30 
   6  -2   7   25.50    5.10 
   6  -2   7   32.30    6.80 
   7  -2   7  184.78   13.60 
   7  -3  -7   19.60    7.80 
   6  -3  -7  231.38   14.10 
   5  -3  -7  223.48   12.70 
   5   3  -7  207.68    9.60 
   4  -3  -7  389.26   16.00 
  -4   3   7  380.86   13.80 
   4   3  -7  392.16   14.00 
   3  -3  -7   33.40    5.10 
  -3   3   7   44.00    4.30 
  -2  -3   7  748.13   22.90 
   2  -3  -7  754.12   24.10 
  -2   3   7  711.33   22.30 
   1  -3  -7  649.64   21.40 
  -1  -3   7  672.63   20.20 
  -1   3   7  667.73   19.90 
   0  -3  -7 1233.18   37.70 
   0  -3   7 1330.67   36.40 
   0   3  -7 1295.67   36.20 
   0   3   7 1227.58   36.50 
   0   3   7 1280.07   36.20 
   0   3  -7 1286.67   36.30 
  -1  -3  -7  545.55   16.70 
   1  -3   7  516.65   15.90 
   1   3   7  510.75   17.00 
  -1   3  -7  534.05   15.70 
   1   3   7  542.25   16.80 
   2  -3   7 2910.51   76.49 
   2   3   7 2760.12   78.39 
   2   3   7 2662.53   77.29 
   3  -3   7   15.10    2.60 
   3  -3   7   14.50    4.20 
   3   3   7   18.10    2.30 
   4  -3   7  656.43   23.90 
   4  -3   7  675.23   20.60 
   4   3   7  654.93   21.00 
   5  -3   7   16.30    5.80 
   5  -3   7   21.60    4.80 
   6  -3   7  415.16   19.50 
   7  -4  -7   92.69   11.10 
   6  -4  -7  101.59   10.40 
   5  -4  -7  322.77   15.60 
   4  -4  -7  158.78   10.10 
  -4   4   7  164.08    7.60 
   3  -4  -7 1220.38   38.60 
  -3   4   7 1251.67   36.20 
  -2  -4   7  560.24   18.50 
   2  -4  -7  576.44   20.00 
  -2   4   7  574.24   17.90 
  -1  -4   7 1530.85   45.20 
   1  -4  -7 1584.54   46.70 
  -1   4   7 1626.04   45.10 
  -1   4   7 1617.14   45.50 
   0  -4  -7   95.49    6.00 
   0  -4   7  100.79    4.50 
   0   4  -7  100.09    4.70 
   0   4   7   99.99    5.20 
   0   4  -7   98.69    5.20 
   0   4   7   96.79    5.20 
   1  -4   7  557.44   16.20 
  -1  -4  -7  551.74   17.60 
  -1   4  -7  541.05   16.00 
   1   4   7  546.85   17.00 
   1   4   7  531.25   17.80 
   2  -4   7   -3.00    3.40 
   2  -4   7    2.50    1.40 
   2   4   7    3.30    3.30 
   2   4   7    0.50    1.60 
   3  -4   7  604.54   17.80 
   3  -4   7  595.64   21.90 
   4  -4   7   81.49    9.10 
   5  -4   7  182.58   12.40 
   6  -4   7   48.50    8.70 
   6  -5  -7  233.58   14.80 
   5  -5  -7   10.10    6.00 
   4  -5  -7  308.87   14.90 
  -4   5   7  319.47   11.50 
   3  -5  -7    5.00    4.30 
  -3   5   7    4.20    2.60 
   2  -5  -7 1388.86   41.80 
  -2   5   7 1321.47   38.90 
   1  -5  -7   18.80    4.20 
  -1   5   7   12.90    2.70 
   0  -5   7  517.95   16.20 
   0  -5  -7  549.74   18.30 
   0   5   7  517.45   17.30 
   0   5  -7  529.85   17.50 
   0   5   7  532.75   17.10 
   0   5  -7  559.34   17.20 
   1  -5   7   13.70    4.60 
  -1  -5  -7   18.00    3.50 
   1  -5   7   20.90    2.00 
   1   5   7   17.60    3.80 
  -1   5  -7   20.50    3.50 
  -1   5  -7   22.30    2.00 
   2  -5   7  545.95   20.20 
   2  -5   7  536.85   15.30 
   2   5   7  538.45   18.90 
   3  -5   7   -1.60    3.90 
   4  -5   7  471.45   20.30 
   5  -5   7   35.30    8.00 
   6  -5   7  119.09   12.00 
   6  -6  -7    9.20    7.70 
   5  -6  -7  364.26   18.10 
   4  -6  -7   13.00    5.70 
   3  -6  -7  960.70   32.40 
  -3   6   7  959.90   28.60 
   2  -6  -7  226.48   11.60 
  -2   6   7  217.98    8.60 
   1  -6  -7 1114.59   34.70 
  -1   6   7 1109.49   33.80 
  -1   6   7 1113.49   32.40 
   1   6  -7 1080.39   33.80 
   0  -6  -7   15.60    3.70 
   0  -6   7   13.10    4.10 
   0   6   7   12.80    3.80 
   0   6  -7    9.90    3.70 
   0   6   7   15.60    3.40 
   1  -6   7 1829.42   54.69 
  -1  -6  -7 1801.82   52.99 
  -1   6  -7 1817.72   53.29 
   1   6   7 1836.72   52.89 
   2  -6   7    6.80    4.60 
   2   6   7   15.30    4.50 
   3  -6   7  101.19    9.00 
   3   6   7   95.99    7.80 
   4  -6   7    8.00    6.20 
   5  -6   7  217.18   14.40 
   5  -7  -7   31.40    8.30 
   4  -7  -7  254.47   14.60 
   3  -7  -7    5.90    5.20 
   2  -7  -7  721.73   25.70 
  -2  -7   7  710.53   23.50 
  -2   7   7  700.63   22.60 
   1  -7  -7   90.79    7.30 
  -1  -7   7  102.89    7.30 
  -1   7   7   84.89    5.40 
  -1   7   7   83.49    7.00 
   1   7  -7   88.99    7.20 
   0  -7  -7  687.93   23.20 
   0  -7   7  688.63   24.00 
   0   7  -7  703.73   23.40 
   0   7   7  660.73   22.70 
   0   7   7  671.83   21.80 
   1  -7   7   56.79    7.30 
  -1  -7  -7   50.69    5.70 
  -1   7  -7   43.20    6.00 
   1   7   7   58.39    6.20 
   1   7   7   48.00    6.30 
   2  -7   7  264.17   13.90 
   2   7   7  283.17   12.60 
   3  -7   7   -4.30    4.90 
   3   7   7   -2.40    4.90 
   4  -7   7  164.98   12.50 
   5  -7   7   21.60    8.80 
   5  -8  -7  108.49   12.40 
   4  -8  -7   49.40    8.50 
   3  -8  -7  111.09   10.20 
   2  -8  -7   55.09    7.60 
   2   8  -7   63.99    7.70 
   1  -8  -7  272.67   13.50 
  -1  -8   7  274.37   12.70 
  -1   8   7  275.77   12.70 
   1   8  -7  270.07   13.00 
   0  -8   7   14.60    5.30 
   0  -8  -7   12.90    4.70 
   0   8   7   12.20    4.80 
   0   8  -7    9.70    4.70 
   0   8   7    7.20    3.50 
   1  -8   7  194.38   12.10 
  -1   8  -7  202.58   11.60 
   1   8   7  200.88   10.80 
   1   8   7  207.38   10.00 
   2  -8   7   12.00    5.70 
   2   8   7   15.50    5.50 
   3  -8   7  169.48   12.30 
   3   8   7  161.58   10.90 
   4  -8   7   -2.20    6.50 
   4   8   7    5.70    6.40 
   3  -9  -7   18.40    7.40 
   2  -9  -7  249.48   14.30 
   2   9  -7  229.18   13.10 
  -1  -9   7   27.30    8.60 
   1  -9  -7   26.40    6.50 
   1   9  -7   34.10    6.80 
  -1   9   7   44.10    7.10 
   0  -9   7  204.38   11.90 
   0   9  -7  219.78   12.10 
   0   9   7  218.68   11.70 
   1  -9   7    3.70    5.90 
   1   9   7    2.60    4.20 
   1   9   7    2.30    5.40 
   2  -9   7  329.27   17.30 
   2   9   7  310.47   14.10 
   2   9   7  296.07   14.70 
   3  -9   7    7.00    6.60 
   3   9   7    8.60    5.50 
   2 -10  -7    2.40    6.30 
   2  10  -7   -0.10    6.00 
   1  10  -7  161.58   11.30 
  -1  10   7  169.68   11.20 
   0 -10   7    9.50    8.50 
   0  10  -7    2.30    5.30 
   0  10   7    5.20    5.30 
   1 -10   7   58.89    9.50 
   1  10   7   72.49    8.90 
   7   0  -8    9.50    5.60 
   6   0  -8 1806.42   55.49 
   5   0  -8   13.20    4.70 
  -4   0   8 1200.18   36.40 
   4   0  -8 1181.18   37.00 
   3   0  -8   -0.90    2.50 
  -3   0   8    0.90    2.60 
  -2   0   8 4142.39  114.39 
   2   0  -8 4131.19  115.39 
  -1   0   8    4.10    1.80 
   1   0  -8    1.30    1.80 
   0   0   8 4153.48  113.89 
   1   0   8   -0.20    1.60 
   2   0   8  628.34   19.50 
   3   0   8   -2.30    3.00 
   4   0   8  908.31   28.60 
   4   0   8  869.21   28.00 
   5   0   8   -4.50    3.50 
   6   0   8  378.76   17.50 
   7   0   8   21.20    6.40 
   7  -1  -8  374.66   17.60 
   6  -1  -8   85.39    8.30 
   6   1  -8   80.59    7.80 
   5  -1  -8  613.44   22.20 
  -5   1   8  578.54   20.60 
   5   1  -8  575.54   21.10 
   4  -1  -8   26.40    4.90 
  -4  -1   8   25.10    4.50 
  -4   1   8   22.60    4.40 
   4   1  -8   20.10    4.30 
   3  -1  -8  952.50   29.90 
  -3  -1   8  950.80   29.00 
   3   1  -8  940.21   29.40 
  -3   1   8  923.31   28.60 
  -2  -1   8  418.76   13.60 
   2  -1  -8  397.26   14.50 
  -2   1   8  389.56   13.40 
   2   1  -8  378.06   13.90 
   1  -1  -8 1110.49   30.10 
  -1  -1   8 1030.80   31.50 
   1  -1  -8 1050.99   32.50 
  -1   1   8 1121.59   31.40 
   0  -1   8  344.17   10.90 
   0  -1  -8  319.07   11.60 
   0   1   8  330.37   10.90 
   0   1   8  330.57    9.50 
   1  -1   8 3626.44   98.79 
   1   1   8 3565.14   99.29 
   2  -1   8   10.20    2.50 
   2   1   8   10.60    3.10 
   3  -1   8 2772.02   78.39 
   3   1   8 2820.72   79.19 
   4  -1   8  294.37   13.20 
   4  -1   8  304.57   12.30 
   4   1   8  335.27   12.70 
   5  -1   8  665.93   22.70 
   5  -1   8  680.93   23.90 
   5   1   8  661.63   22.50 
   6  -1   8   56.19    6.90 
   6  -1   8   52.19    7.30 
   7  -2  -8   23.40    6.80 
   6  -2  -8   43.40    8.00 
   6   2  -8   55.79    6.60 
   5  -2  -8  248.58   12.90 
   5   2  -8  283.07   12.10 
  -5   2   8  250.97   11.40 
   4  -2  -8 1067.39   34.30 
  -4  -2   8 1069.49   33.40 
  -4   2   8 1049.09   32.50 
   4   2  -8 1079.09   33.10 
   3  -2  -8   -4.10    2.90 
  -3  -2   8   -1.00    2.40 
  -3   2   8    2.00    2.40 
   3   2  -8   -0.70    2.20 
  -2  -2   8  107.19    5.70 
   2  -2  -8  110.09    6.60 
  -2   2   8  100.79    5.40 
  -1  -2   8  230.48    8.60 
   1  -2  -8  237.28    7.70 
   1  -2  -8  213.68    9.60 
  -1   2   8  242.18    8.50 
   0  -2   8 3052.79   87.49 
   0  -2  -8 3058.99   88.49 
   0   2  -8 3232.18   86.59 
   0   2   8 3203.88   87.59 
   0   2   8 3287.67   86.59 
   1  -2   8  986.90   27.90 
   1  -2   8  968.60   27.50 
  -1   2  -8  985.70   28.00 
   1   2   8  952.90   28.90 
   1   2   8  940.51   28.60 
   2  -2   8 2755.32   76.29 
   2   2   8 2699.13   76.69 
   2   2   8 2814.72   77.69 
   3  -2   8   34.90    3.70 
   3  -2   8   34.90    5.40 
   3   2   8   35.00    5.00 
   4  -2   8 1216.98   36.00 
   4  -2   8 1201.98   38.40 
   4   2   8 1204.18   35.80 
   5  -2   8   71.29    8.30 
   5  -2   8   62.99    6.30 
   6  -2   8  211.58   12.20 
   6  -2   8  212.58   13.00 
   7  -3  -8  167.08   13.50 
   6  -3  -8   36.50    7.60 
   5  -3  -8  427.86   18.20 
  -5   3   8  422.56   15.80 
   5   3  -8  432.26   15.90 
   4  -3  -8   23.60    5.50 
   4   3  -8   33.00    4.40 
  -4   3   8   40.80    4.70 
   3  -3  -8 1533.85   45.60 
  -3  -3   8 1430.66   44.10 
  -3   3   8 1508.25   43.30 
  -2  -3   8  201.08    8.20 
   2  -3  -8  185.28    9.40 
  -2   3   8  189.08    7.80 
  -1  -3   8 1564.74   43.80 
   1  -3  -8 1447.36   45.00 
  -1   3   8 1569.24   43.50 
   0  -3  -8  533.75   18.60 
   0  -3   8  568.44   17.30 
   0   3   8  566.64   17.60 
   0   3  -8  569.84   17.00 
   0   3   8  562.44   16.90 
  -1  -3  -8  807.32   24.20 
   1  -3   8  800.92   23.40 
   1   3   8  763.92   24.30 
  -1   3  -8  797.92   23.20 
   1   3   8  821.82   24.60 
   2  -3   8   48.80    3.10 
   2   3   8   40.20    3.60 
   2   3   8   38.50    5.00 
   3  -3   8  477.55   18.30 
   3  -3   8  490.85   15.20 
   3   3   8  489.45   17.50 
   3   3   8  467.45   15.40 
   4  -3   8   30.20    3.90 
   4  -3   8   31.60    6.20 
   5  -3   8  216.68   12.90 
   6  -3   8   86.19    9.90 
   7  -4  -8   -3.70    6.00 
   6  -4  -8  355.26   17.70 
   5  -4  -8    8.50    5.50 
  -5   4   8    8.90    3.60 
   4  -4  -8  236.48   12.50 
  -4   4   8  239.88    9.80 
   3  -4  -8    9.30    4.40 
  -3   4   8   16.60    3.20 
   2  -4  -8 1563.44   46.00 
  -2  -4   8 1500.25   44.40 
  -2   4   8 1502.55   43.70 
   1  -4  -8  128.69    7.50 
  -1  -4   8  132.39    6.20 
  -1   4   8  140.99    5.90 
  -1   4   8  130.39    6.00 
   0  -4  -8 1493.85   45.50 
   0  -4   8 1584.34   43.80 
   0   4  -8 1548.84   44.20 
   0   4   8 1544.25   44.30 
   0   4   8 1555.44   44.10 
   1  -4   8  105.89    4.70 
  -1  -4  -8  106.19    5.70 
   1   4   8  106.39    6.20 
  -1   4  -8  104.69    4.30 
   2  -4   8 1051.19   30.60 
   2  -4   8 1088.19   34.40 
   2   4   8 1059.19   32.90 
   2   4   8 1092.79   31.20 
   3  -4   8    7.60    4.40 
   3  -4   8   13.20    2.20 
   3   4   8    5.80    4.30 
   4  -4   8  223.98   12.50 
   5  -4   8  103.99   10.20 
   6  -4   8  244.98   15.90 
   6  -5  -8   12.00    7.00 
   5  -5  -8  341.47   17.00 
   4  -5  -8   -0.90    4.60 
  -4   5   8   -1.30    2.60 
   3  -5  -8  437.06   18.00 
  -3   5   8  459.15   15.20 
   2  -5  -8  146.59    9.30 
  -2   5   8  159.98    7.00 
   1  -5  -8 1046.10   32.40 
  -1  -5   8  964.30   30.30 
  -1   5   8 1046.30   30.30 
  -1   5   8 1052.89   31.00 
   0  -5  -8   55.59    5.30 
   0  -5   8   62.39    3.60 
   0   5   8   60.29    4.30 
   0   5  -8   64.99    4.80 
   0   5   8   62.99    4.50 
  -1  -5  -8  520.35   17.70 
   1  -5   8  515.65   15.60 
  -1   5  -8  527.25   15.50 
   1   5   8  534.05   17.80 
   2  -5   8    3.80    1.40 
   2  -5   8    6.20    4.20 
   2   5   8    0.30    3.70 
   3  -5   8  394.46   17.10 
   3   5   8  399.16   15.80 
   4  -5   8   16.80    6.00 
   5  -5   8  375.56   18.60 
   6  -5   8   18.40    8.70 
   6  -6  -8  147.99   13.80 
   5  -6  -8   26.50    8.00 
   4  -6  -8  460.55   19.80 
   3  -6  -8   38.50    6.60 
  -3   6   8   27.70    3.80 
   2  -6  -8 1189.98   38.20 
  -2   6   8 1205.28   35.10 
   1  -6  -8   35.30    5.30 
   1   6  -8   37.70    5.60 
  -1   6   8   36.90    5.00 
  -1   6   8   30.70    4.10 
   0  -6  -8  639.84   22.30 
   0   6   8  649.24   21.40 
   0   6  -8  664.33   21.70 
   0   6   8  667.43   21.00 
  -1  -6  -8    7.70    3.50 
   1  -6   8   10.40    4.80 
   1   6   8   11.00    4.00 
   1   6   8   10.50    4.00 
   2  -6   8  376.16   16.50 
   2   6   8  385.56   15.00 
   3  -6   8   -1.80    4.60 
   3   6   8   -2.70    4.30 
   4  -6   8  373.56   17.80 
   4   6   8  344.67   16.00 
   5  -6   8   13.00    7.10 
   5  -7  -8  413.06   20.90 
   4  -7  -8   23.50    7.10 
   3  -7  -8  561.84   22.40 
   2  -7  -8  102.59    9.50 
  -2   7   8   80.99    5.60 
  -1  -7   8  692.03   23.80 
   1  -7  -8  695.43   24.40 
  -1   7   8  689.03   21.60 
  -1   7   8  696.73   23.50 
   1   7  -8  686.03   23.50 
   0  -7  -8   48.00    6.00 
   0  -7   8   50.39    6.50 
   0   7  -8   50.99    6.60 
   0   7   8   54.59    5.10 
   0   7   8   55.29    6.60 
   1  -7   8  692.13   25.10 
  -1  -7  -8  647.34   22.80 
   1   7   8  728.33   23.00 
  -1   7  -8  660.83   23.40 
   1   7   8  686.73   23.10 
   2  -7   8    4.80    5.30 
   2   7   8    7.30    4.90 
   3  -7   8  196.28   13.70 
   3   7   8  197.48   11.10 
   4  -7   8    2.60    6.00 
   4   7   8    1.00    6.20 
   5  -7   8   96.89   11.90 
   5   7   8  100.89   11.90 
   4  -8  -8  234.58   15.60 
   3  -8  -8   21.00    6.50 
   2  -8  -8  367.26   16.80 
   2   8  -8  373.96   16.50 
   1  -8  -8   44.40    7.00 
  -1  -8   8   40.00    6.20 
  -1   8   8   46.00    6.70 
   1   8  -8   44.50    6.80 
   0  -8   8  376.96   16.20 
   0  -8  -8  363.66   15.50 
   0   8   8  379.26   15.40 
   0   8  -8  374.16   15.70 
   0   8   8  384.86   14.10 
   1  -8   8   24.40    6.50 
   1   8   8   30.80    5.30 
   1   8   8   30.90    6.00 
   2  -8   8  331.57   17.30 
   2   8   8  348.37   14.80 
   3  -8   8    9.50    7.20 
   3   8   8  -10.00    5.00 
   4  -8   8   86.39   11.30 
   4   8   8  102.79   11.20 
   3  -9  -8  107.49   10.90 
   2  -9  -8   68.89    8.90 
   2   9  -8   64.09    8.60 
   1  -9  -8  226.68   13.10 
  -1  -9   8  221.38   13.30 
  -1   9   8  233.98   12.30 
   1   9  -8  242.18   12.70 
   0  -9   8    7.20    5.40 
   0   9  -8   16.60    6.00 
   0   9   8   10.60    5.30 
   1  -9   8  102.69   10.60 
   1   9   8  106.49    8.00 
   1   9   8  108.69    9.50 
   2  -9   8   31.70    7.30 
   2   9   8   14.10    6.90 
   2   9   8   25.10    6.20 
   3  -9   8  139.19   14.20 
   3   9   8  138.69   10.10 
   1  10  -8    4.20    5.40 
  -1  10   8    9.00    6.30 
   0 -10   8   89.49   11.30 
   0  10   8   93.69    9.70 
   0  10  -8   92.99   10.60 
   1 -10   8   75.29   10.30 
   1  10   8   78.19    9.30 
   7   0  -9  215.28   13.50 
   6   0  -9   23.90    5.90 
   5   0  -9  725.63   25.80 
  -5   0   9  759.72   25.40 
  -4   0   9   -1.80    3.30 
   4   0  -9   -1.70    3.10 
   3   0  -9  573.44   19.90 
  -3   0   9  565.44   18.80 
  -2   0   9    2.50    2.20 
   2   0  -9    0.90    2.20 
   1   0  -9 1557.84   45.00 
  -1   0   9 1514.15   44.00 
   1   0   9 6252.27  170.88 
   2   0   9   -4.90    2.20 
   3   0   9 3616.14  101.09 
   5   0   9  348.17   14.50 
   5   0   9  343.37   14.70 
   6   0   9    0.40    4.30 
   7  -1  -9   19.00    7.00 
   6  -1  -9  308.77   15.00 
   6   1  -9  288.37   14.10 
   5  -1  -9  523.05   20.20 
  -5   1   9  546.45   19.40 
   5   1  -9  490.55   19.40 
  -4  -1   9 1118.59   34.10 
   4  -1  -9 1063.39   34.70 
  -4   1   9 1066.49   33.40 
   4   1  -9 1086.79   34.10 
  -3  -1   9  197.28    8.70 
   3  -1  -9  192.28    9.60 
  -3   1   9  186.78    8.30 
   3   1  -9  192.68    9.20 
   2  -1  -9  323.77   12.90 
  -2  -1   9  345.97   12.00 
   2   1  -9  326.37   12.50 
  -2   1   9  317.97   11.70 
   1  -1  -9   48.50    4.10 
  -1  -1   9   35.80    3.70 
   1  -1  -9   36.10    2.00 
  -1   1   9   36.20    3.10 
   0  -1  -9 2999.80   84.09 
   0  -1   9 3056.29   83.09 
   0   1   9 2970.90   83.09 
   0   1   9 2972.80   81.39 
   1  -1   9  766.42   22.70 
   1   1   9  760.82   23.10 
   2  -1   9 1654.23   46.50 
   2   1   9 1609.14   47.10 
   3  -1   9    8.50    3.00 
   3   1   9    8.30    4.00 
   4  -1   9 1641.34   49.80 
   4  -1   9 1640.44   48.30 
   4   1   9 1646.74   48.70 
   4   1   9 1635.54   49.10 
   5  -1   9   87.09    7.00 
   5  -1   9   81.39    7.40 
   5   1   9   86.29    7.30 
   5   1   9   82.99    7.00 
   6  -1   9  264.87   12.80 
   6  -1   9  258.37   13.90 
   6   1   9  273.57   13.70 
   7  -2  -9  370.76   18.30 
   6  -2  -9    8.90    5.40 
   6   2  -9    4.30    4.00 
   5  -2  -9  195.78   12.20 
  -5   2   9  219.78   10.30 
   5   2  -9  204.88   10.30 
  -4  -2   9   11.00    3.90 
   4  -2  -9    1.10    4.10 
   4   2  -9    4.00    3.10 
  -4   2   9    3.80    3.40 
  -3  -2   9 1752.12   51.49 
   3  -2  -9 1721.83   52.49 
  -3   2   9 1835.22   50.89 
   3   2  -9 1726.63   51.49 
   2  -2  -9    0.40    2.70 
  -2  -2   9    6.20    2.40 
  -2   2   9   -1.30    1.80 
   1  -2  -9 3975.60  105.69 
   1  -2  -9 3699.13  108.29 
  -1  -2   9 3824.32  106.99 
  -1   2   9 3954.00  106.69 
   0  -2   9  142.19    6.10 
   0  -2  -9  136.69    7.00 
   0   2  -9  132.89    5.10 
   0   2   9  152.58    5.10 
   0   2   9  149.49    6.30 
   1  -2   9  985.10   28.10 
   1  -2   9 1027.80   28.80 
   1   2   9  962.00   29.50 
   2  -2   9   49.50    3.50 
   2   2   9   39.30    4.70 
   3  -2   9 1102.59   32.20 
   3   2   9 1073.09   33.60 
   4  -2   9   81.49    8.50 
   4  -2   9   69.89    5.70 
   4   2   9   60.29    5.60 
   4   2   9   75.59    6.80 
   5  -2   9  259.97   14.00 
   5  -2   9  255.17   11.20 
   5   2   9  256.37   12.60 
   6  -2   9   47.70    7.70 
   6   2   9   54.89    8.10 
   7  -3  -9   11.70    7.10 
   6  -3  -9  325.97   16.60 
   5  -3  -9    2.50    4.70 
  -5   3   9   -0.30    3.40 
   5   3  -9    5.80    3.20 
   4  -3  -9  588.54   22.20 
  -4   3   9  588.94   20.00 
   4   3  -9  622.94   20.60 
   3  -3  -9   27.60    5.20 
  -3  -3   9   28.60    4.40 
  -3   3   9   32.90    4.20 
  -2  -3   9 1314.67   38.00 
   2  -3  -9 1270.67   39.40 
  -2   3   9 1256.87   37.50 
  -1  -3   9   38.70    3.80 
   1  -3  -9   27.10    4.40 
  -1   3   9   33.50    3.10 
   0  -3  -9  891.31   28.00 
   0  -3   9  881.31   26.60 
   0   3   9  901.21   25.90 
   0   3  -9  897.91   26.00 
   0   3   9  900.31   26.70 
  -1  -3  -9    8.40    2.20 
   1  -3   9   10.40    2.10 
   1   3   9    7.50    2.80 
   2  -3   9 1449.26   40.50 
   2   3   9 1400.96   42.30 
   3  -3   9   43.40    3.50 
   3  -3   9   53.59    6.70 
   3   3   9   56.39    6.30 
   4  -3   9  230.18   12.50 
   4  -3   9  235.68    9.40 
   4   3   9  229.78   11.50 
   5  -3   9   75.79    9.60 
   5   3   9   73.99    8.50 
   6  -3   9  191.28   13.80 
   7  -4  -9  119.99   12.60 
   6  -4  -9   -2.40    6.50 
   5  -4  -9  395.56   18.10 
  -5   4   9  403.16   15.40 
   4  -4  -9    5.80    4.70 
  -4   4   9    3.60    3.00 
  -3  -4   9 1033.20   33.70 
   3  -4  -9 1126.29   35.50 
  -3   4   9 1118.59   32.80 
   2  -4  -9   61.69    6.80 
  -2  -4   9   53.99    4.60 
  -2   4   9   63.29    4.50 
  -1  -4   9  618.54   19.60 
   1  -4  -9  608.04   21.30 
  -1   4   9  647.44   19.50 
  -1   4   9  616.14   19.30 
   0  -4  -9   58.39    5.00 
   0  -4   9   55.19    3.70 
   0   4  -9   63.49    4.10 
   0   4   9   60.59    4.20 
   0   4   9   63.39    4.00 
   1  -4   9 1394.26   41.20 
  -1  -4  -9 1496.75   42.50 
  -1   4  -9 1480.85   41.50 
   1   4   9 1432.86   42.50 
   2  -4   9   16.10    2.40 
   2   4   9   18.10    4.40 
   2   4   9   18.20    3.30 
   3  -4   9  299.57    9.90 
   3  -4   9  284.67   13.80 
   3   4   9  280.67   12.60 
   4  -4   9   19.90    6.10 
   4   4   9   16.40    5.60 
   5  -4   9  480.05   20.90 
   5   4   9  458.35   19.30 
   6  -4   9   29.40    8.10 
   6  -5  -9  256.77   15.70 
   5  -5  -9   28.90    7.80 
   4  -5  -9  369.26   17.00 
  -4   5   9  339.07   13.10 
   3  -5  -9   74.59    8.10 
  -3   5   9   65.09    5.10 
   2  -5  -9 1575.04   47.50 
  -2   5   9 1520.85   44.70 
   1  -5  -9   59.89    6.40 
  -1  -5   9   59.09    4.30 
  -1   5   9   59.29    4.50 
  -1   5   9   70.59    5.10 
   1   5  -9   59.09    5.10 
   0  -5   9  595.24   18.40 
   0  -5  -9  596.74   20.70 
   0   5   9  580.64   19.10 
   0   5   9  608.24   19.10 
   0   5  -9  608.74   19.40 
  -1  -5  -9    6.60    2.90 
   1  -5   9    8.50    2.00 
  -1   5  -9    9.60    1.90 
   1   5   9    7.00    3.40 
   2  -5   9  734.23   25.80 
   2  -5   9  716.43   21.20 
   2   5   9  721.13   24.10 
   3  -5   9    3.30    4.60 
   3   5   9   -3.40    4.10 
   4  -5   9  308.67   16.00 
   4   5   9  323.07   14.80 
   5  -5   9   68.19    9.80 
   5   5   9  103.79   10.60 
   6  -6  -9   28.60    9.00 
   5  -6  -9  533.75   23.20 
   4  -6  -9   10.70    5.80 
   3  -6  -9  122.19    9.90 
  -3   6   9  136.49    7.00 
   2  -6  -9   20.00    5.60 
  -2   6   9   28.70    3.80 
   1  -6  -9  779.82   26.70 
   1   6  -9  810.12   25.70 
  -1   6   9  790.22   24.30 
  -1   6   9  779.12   25.10 
   0  -6  -9   59.49    6.40 
   0   6  -9   67.59    6.30 
   0   6   9   59.79    4.80 
   0   6   9   67.49    5.80 
   1  -6   9  217.98   11.90 
  -1  -6  -9  228.38   10.40 
   1   6   9  233.38   10.50 
   1   6   9  241.78   10.60 
   2  -6   9   -0.50    4.50 
   2   6   9   -1.10    4.50 
   3  -6   9  297.07   15.20 
   3   6   9  289.47   13.50 
   4  -6   9   40.90    8.50 
   4   6   9   40.40    7.50 
   5  -6   9  265.77   16.40 
   5   6   9  275.37   15.00 
   5  -7  -9   12.30    7.20 
   4  -7  -9  339.77   17.90 
   3  -7  -9   32.30    7.20 
   2  -7  -9 1050.79   33.80 
  -2   7   9  929.11   29.60 
   1  -7  -9   17.80    5.40 
  -1   7   9   16.30    3.70 
  -1   7   9   19.70    4.80 
   1   7  -9    9.50    4.60 
   0  -7  -9  265.77   12.50 
   0  -7   9  268.47   12.80 
   0   7   9  260.57   10.90 
   0   7   9  258.17   11.50 
   0   7  -9  269.87   12.30 
   1  -7   9   31.20    6.50 
   1   7   9   34.80    5.60 
   1   7   9   34.00    5.90 
   2  -7   9  471.45   20.20 
   2   7   9  492.95   18.30 
   3  -7   9   29.90    7.40 
   3   7   9   19.40    6.10 
   4  -7   9  221.78   14.70 
   4   7   9  226.18   13.00 
   4  -8  -9    7.90    6.50 
   3  -8  -9  591.74   24.00 
   2  -8  -9    7.70    5.20 
  -2  -8   9    6.10    6.20 
   2   8  -9   11.30    5.40 
  -1  -8   9  418.26   17.20 
   1  -8  -9  421.46   17.80 
  -1   8   9  407.96   16.40 
   1   8  -9  393.06   16.60 
   0  -8   9   71.09    8.00 
   0  -8  -9   70.19    7.80 
   0   8   9   82.39    6.20 
   0   8  -9   67.49    7.80 
   0   8   9   80.49    7.90 
   1  -8   9  523.05   21.70 
   1   8   9  571.54   19.80 
   1   8   9  531.15   20.40 
   2  -8   9   36.60    7.40 
   2   8   9   17.00    5.80 
   2   8   9   30.40    6.40 
   3  -8   9  104.49   11.70 
   3   8   9  112.29   10.70 
   4  -8   9   -4.10    7.60 
   4   8   9   -1.50    5.90 
   3  -9  -9   10.60    7.10 
   2  -9  -9   36.30    7.90 
   2   9  -9   36.00    8.00 
   1  -9  -9    6.30    5.40 
  -1  -9   9    4.00    5.10 
  -1   9   9    2.50    4.80 
   1   9  -9    6.20    5.00 
   0  -9   9  111.79    9.50 
   0   9   9  138.29    9.40 
   0   9  -9  124.19   10.20 
   1  -9   9   53.89    8.40 
   1   9   9   72.59    8.30 
   1   9   9   66.49    7.50 
   2  -9   9   33.50    8.70 
   2   9   9   42.90    7.60 
   2   9   9   48.00    7.60 
  -1  10   9  102.09   10.10 
   1  10  -9   90.59   10.70 
   0 -10   9   -0.90    5.80 
   0  10  -9    3.80    5.80 
   0  10   9   16.80    6.70 
   7   0 -10    4.90    5.80 
   6   0 -10   51.49    7.40 
  -5   0  10   -5.10    3.50 
   5   0 -10   -3.20    4.30 
  -4   0  10  502.05   18.00 
   4   0 -10  491.45   18.90 
  -3   0  10    0.90    2.40 
   3   0 -10   -3.80    2.60 
  -2   0  10   98.59    5.50 
   2   0 -10   98.99    6.30 
   1   0 -10    0.30    2.10 
  -1   0  10    1.60    1.90 
   0   0  10 8450.05  230.18 
   1   0  10    4.40    2.20 
   2   0  10 1803.42   51.69 
   3   0  10   15.40    3.60 
   4   0  10 3530.45   99.29 
   4   0  10 3498.75  100.09 
   5   0  10    8.20    4.20 
   5   0  10   -3.40    4.20 
   6   0  10  161.28   10.60 
   7  -1 -10  249.97   15.30 
   6  -1 -10    3.20    5.30 
   6   1 -10    0.80    4.20 
   5  -1 -10  581.44   22.10 
  -5  -1  10  586.34   21.30 
   5   1 -10  579.34   21.40 
  -5   1  10  557.14   20.60 
   4  -1 -10   -0.70    3.60 
  -4  -1  10    0.30    3.20 
  -4   1  10    2.80    3.40 
   4   1 -10    6.80    3.50 
  -3  -1  10  944.61   29.50 
   3  -1 -10  925.91   30.70 
  -3   1  10  952.50   29.20 
   3   1 -10  973.40   30.30 
   2  -1 -10   -0.30    2.40 
  -2  -1  10    1.30    2.20 
   2   1 -10    0.20    2.10 
  -2   1  10    1.00    2.20 
   1  -1 -10 2947.61   84.19 
   1  -1 -10 3068.19   80.99 
  -1  -1  10 2798.92   82.89 
  -1   1  10 3056.69   82.89 
   0  -1  10   73.19    4.50 
   0  -1 -10   76.89    5.40 
   0   1  10   76.89    4.40 
   0   1  10   77.09    2.70 
   1  -1  10 2115.49   56.69 
   1  -1  10 2046.90   57.99 
   1   1  10 2023.90   58.29 
   2  -1  10    4.10    2.50 
   2   1  10    7.30    3.00 
   3  -1  10 1577.84   47.20 
   3   1  10 1684.43   48.30 
   4  -1  10  283.97   13.10 
   4  -1  10  276.17   11.80 
   4   1  10  268.57   11.90 
   4   1  10  282.57   12.40 
   5  -1  10  166.38    8.90 
   5  -1  10  154.38    9.90 
   5   1  10  153.38   10.00 
   5   1  10  155.98    8.90 
   6  -1  10   44.90    6.60 
   6  -1  10   43.90    7.60 
   6   1  10   35.70    7.00 
   7  -2 -10   22.80    7.20 
   6  -2 -10  970.50   34.70 
   6   2 -10 1026.50   33.20 
   5  -2 -10   93.89    8.90 
   5   2 -10  107.69    7.70 
  -5   2  10  110.19    7.70 
   4  -2 -10  784.72   27.40 
  -4  -2  10  797.12   26.40 
   4   2 -10  797.62   26.20 
  -4   2  10  778.52   25.40 
  -3  -2  10   29.20    4.50 
   3  -2 -10   30.00    5.30 
  -3   2  10   29.20    4.10 
   3   2 -10   29.10    4.50 
   2  -2 -10 1260.77   38.40 
  -2  -2  10 1283.87   36.90 
  -2   2  10 1165.08   36.40 
   1  -2 -10    6.80    1.50 
  -1  -2  10    4.30    2.30 
   1  -2 -10   -1.00    2.40 
  -1   2  10    8.50    2.30 
   0  -2 -10 2037.30   58.69 
   0  -2  10 1982.70   57.39 
   0   2  10 2052.19   57.49 
   0   2  10 2055.79   55.89 
   1  -2  10  144.69    6.00 
   1  -2  10  135.49    5.10 
   1   2  10  132.29    6.50 
   2  -2  10 1689.73   48.80 
   2   2  10 1752.62   50.19 
   3  -2  10  141.99    6.90 
   3   2  10  152.08    8.30 
   4  -2  10   21.90    6.40 
   4  -2  10   24.40    4.30 
   4   2  10   26.70    4.30 
   4   2  10   26.10    5.70 
   5  -2  10    1.90    4.90 
   5  -2  10    7.30    4.00 
   5   2  10   -0.10    5.40 
   6  -2  10  306.47   16.40 
   6   2  10  313.77   15.20 
   7  -3 -10  233.58   15.60 
   6  -3 -10   22.80    7.60 
   5  -3 -10  264.67   14.00 
  -5   3  10  238.48   11.50 
   5   3 -10  261.77   11.90 
  -4  -3  10   11.50    4.10 
   4  -3 -10    2.30    4.60 
  -4   3  10    8.60    3.60 
   3  -3 -10 1163.88   37.70 
  -3  -3  10 1193.58   36.40 
  -3   3  10 1189.58   35.50 
  -2  -3  10  161.38    7.70 
   2  -3 -10  138.59    8.70 
  -2   3  10  152.98    7.20 
  -1  -3  10 1131.29   33.10 
   1  -3 -10 1063.49   34.60 
  -1   3  10 1135.19   32.80 
   0  -3 -10   14.00    3.50 
   0  -3  10   11.70    2.80 
   0   3 -10   15.80    2.20 
   0   3  10   13.40    2.90 
   0   3  10   16.40    2.20 
   1  -3  10 1079.19   31.30 
   1   3  10 1060.09   32.20 
   2  -3  10  173.78    6.90 
   2   3  10  168.28    8.50 
   3  -3  10  918.61   31.80 
   3  -3  10  961.90   28.40 
   3   3  10  973.20   30.60 
   4  -3  10    8.30    3.30 
   4  -3  10    6.10    5.60 
   4   3  10    5.30    4.80 
   5  -3  10  429.96   19.20 
   5   3  10  419.16   17.90 
   6  -3  10   17.70    7.10 
   6   3  10   25.80    7.10 
   7  -4 -10    4.30    6.60 
   6  -4 -10  258.47   15.50 
   5  -4 -10   11.20    6.00 
  -5   4  10    8.70    4.10 
   4  -4 -10  566.54   22.20 
  -4   4  10  574.34   19.40 
  -3  -4  10   89.19    6.70 
   3  -4 -10  121.09    8.80 
  -3   4  10  126.89    6.70 
  -2  -4  10 1511.75   44.30 
   2  -4 -10 1481.45   46.00 
  -2   4  10 1507.75   43.70 
  -1  -4  10   50.09    4.70 
   1  -4 -10   42.70    5.80 
  -1   4  10   40.90    4.20 
   0  -4 -10 1290.97   39.00 
   0  -4  10 1282.67   37.00 
   0   4  10 1254.37   36.60 
   0   4 -10 1256.87   36.90 
   0   4  10 1283.17   37.50 
  -1  -4 -10   86.89    5.60 
   1  -4  10   78.89    4.60 
   1   4  10   87.09    5.70 
   2  -4  10  597.54   18.50 
   2   4  10  603.94   20.60 
   3  -4  10   39.00    6.60 
   3  -4  10   40.00    3.80 
   3   4  10   35.00    5.90 
   4  -4  10  473.65   20.10 
   4   4  10  447.36   18.30 
   5  -4  10    6.80    6.30 
   5   4  10   10.60    6.20 
   6  -4  10  120.89   11.70 
   6   4  10  118.69   10.60 
   6  -5 -10   30.60    8.20 
   5  -5 -10  458.05   20.60 
  -5   5  10  452.85   19.20 
   4  -5 -10    4.00    5.30 
  -4   5  10    1.60    3.00 
   3  -5 -10  706.83   25.70 
  -3   5  10  682.93   22.20 
   2  -5 -10   67.89    8.10 
  -2  -5  10   60.29    5.10 
  -2   5  10   75.59    5.30 
  -1  -5  10  394.36   13.90 
   1  -5 -10  393.26   16.10 
   1   5 -10  410.06   14.30 
  -1   5  10  409.76   14.00 
  -1   5  10  387.86   13.70 
   0  -5  10    4.40    2.20 
   0  -5 -10    9.40    3.60 
   0   5  10    8.10    2.70 
   0   5  10    4.30    2.70 
   0   5 -10    5.30    2.70 
  -1  -5 -10  840.32   26.60 
   1  -5  10  846.32   24.80 
   1   5  10  827.82   26.50 
   2  -5  10    3.10    4.40 
   2  -5  10    1.70    1.90 
   2   5  10   -0.40    3.90 
   3  -5  10  235.28   12.90 
   3   5  10  213.98   11.40 
   4  -5  10   27.10    7.10 
   4   5  10   22.80    6.50 
   5  -5  10  409.46   20.40 
   5   5  10  428.26   19.30 
   6  -6 -10  126.39   12.50 
   5  -6 -10   49.50    8.80 
   4  -6 -10  359.16   17.40 
   3  -6 -10   96.39   10.00 
  -3   6  10   77.09    6.00 
   2  -6 -10  811.12   28.30 
  -2   6  10  805.02   25.20 
   1  -6 -10    8.10    4.70 
   1   6 -10    4.40    3.30 
  -1   6  10    2.80    3.50 
  -1   6  10    0.70    2.90 
   0  -6  10  525.25   17.10 
   0  -6 -10  535.55   19.80 
   0   6  10  557.74   18.40 
   0   6  10  534.65   18.30 
   0   6 -10  538.65   18.50 
  -1  -6 -10   22.40    4.30 
   1   6  10   25.20    5.00 
   1   6  10   34.00    5.20 
   2  -6  10  408.96   17.80 
   2   6  10  399.76   15.90 
   3  -6  10    4.50    5.10 
   3   6  10    2.00    5.00 
   4  -6  10  430.76   20.40 
   4   6  10  447.86   19.20 
   5  -6  10   35.90    8.80 
   5   6  10   36.50    8.20 
   5  -7 -10  139.49   12.80 
   4  -7 -10   70.49    9.70 
   3  -7 -10  297.77   15.50 
   2  -7 -10   63.39    8.30 
  -2   7  10   39.50    4.70 
   1  -7 -10  364.36   16.20 
  -1   7  10  356.46   14.40 
   1   7 -10  393.66   15.60 
  -1   7  10  365.76   13.60 
   0  -7  10   44.50    7.00 
   0  -7 -10   46.80    6.60 
   0   7  10   52.59    5.80 
   0   7 -10   35.30    5.80 
   0   7  10   44.00    5.80 
   1  -7  10  503.35   20.70 
   1   7  10  526.65   19.10 
   1   7  10  535.25   19.00 
   2  -7  10   18.10    6.00 
   2   7  10   24.20    5.50 
   3  -7  10  214.98   13.80 
   3   7  10  188.18   11.40 
   4  -7  10   17.80    7.40 
   4   7  10   10.00    6.20 
   4  -8 -10  201.48   14.30 
   3  -8 -10   80.09    9.70 
  -2  -8  10  271.07   14.50 
   2  -8 -10  251.67   14.40 
   2   8 -10  239.48   12.60 
  -1  -8  10   23.40    5.70 
   1  -8 -10    9.20    5.50 
  -1   8  10   10.50    5.40 
   1   8 -10    8.90    4.90 
  -1   8  10   13.50    4.20 
   0  -8 -10   93.39    8.60 
   0  -8  10   92.39    9.10 
   0   8 -10  101.39    8.10 
   0   8  10  103.19    9.10 
   0   8  10  101.29    7.00 
   1  -8  10  155.18   11.10 
   1   8  10  165.78    9.70 
   1   8  10  156.48    9.00 
   2  -8  10  136.39   11.20 
   2   8  10  142.59    9.90 
   2   8  10  134.69   10.00 
   3  -8  10   15.30    7.30 
   3   8  10   14.00    6.60 
   3  -9 -10  258.77   15.70 
   2  -9 -10   30.20    7.20 
   2   9 -10   38.80    7.70 
   1  -9 -10  169.98   11.90 
  -1  -9  10  190.58   11.60 
  -1   9  10  196.98   11.10 
   1   9 -10  182.88   11.30 
   0  -9  10   34.50    7.50 
   0   9 -10   49.10    7.90 
   0   9  10   51.19    7.50 
   1  -9  10   83.39   10.60 
   1   9  10   78.39    8.00 
   1   9  10   80.19    8.50 
   2  -9  10    4.30    6.40 
   2   9  10   14.70    6.20 
   2   9  10    8.40    6.00 
   7   0 -11  218.78   14.00 
   6   0 -11   -6.90    3.70 
   5   0 -11  356.56   15.70 
  -5   0  11  342.47   14.90 
  -4   0  11   -2.80    3.20 
   4   0 -11    6.50    3.80 
   3   0 -11  582.64   20.70 
  -3   0  11  576.24   19.50 
  -2   0  11    3.20    2.50 
   2   0 -11   -0.80    2.30 
  -1   0  11 3331.17   94.59 
   1   0 -11 3460.55   96.09 
   1   0  11 4128.19  114.09 
   2   0  11   -3.50    2.20 
   3   0  11  156.08    8.00 
   4   0  11    8.30    4.30 
   4   0  11   -0.70    4.00 
   5   0  11  233.28   11.30 
   5   0  11  220.88   11.80 
   6   0  11  -12.40    3.80 
   7  -1 -11   63.99    9.90 
   6  -1 -11   92.79    9.30 
   6   1 -11  111.49    9.00 
  -5  -1  11   19.00    5.80 
   5  -1 -11   15.90    5.30 
   5   1 -11   13.40    4.80 
  -5   1  11   11.80    4.50 
   4  -1 -11  478.85   19.50 
  -4  -1  11  520.95   18.70 
   4   1 -11  536.65   19.30 
  -4   1  11  495.45   18.20 
   3  -1 -11 1081.29   34.80 
  -3  -1  11 1059.69   33.30 
  -3   1  11 1117.79   33.30 
   3   1 -11 1080.49   34.10 
   2  -1 -11 1213.78   36.40 
  -2  -1  11 1210.88   35.00 
   2   1 -11 1151.58   35.80 
  -2   1  11 1067.19   34.60 
  -1  -1  11   94.19    5.50 
   1  -1 -11   98.39    6.40 
   1  -1 -11  101.29    3.60 
  -1   1  11  107.29    5.50 
   0  -1  11 2840.72   79.59 
   0   1  11 2862.71   79.59 
   1  -1  11   90.89    3.40 
   1  -1  11   88.99    4.80 
   1   1  11   81.69    5.10 
   2  -1  11 1457.15   42.40 
   2   1  11 1470.55   43.00 
   3  -1  11  813.92   25.60 
   3   1  11  814.72   26.30 
   4  -1  11  824.02   28.50 
   4  -1  11  794.22   26.40 
   4   1  11  844.02   27.30 
   5  -1  11    5.50    5.10 
   5  -1  11    2.60    4.20 
   5   1  11    8.80    4.20 
   5   1  11    6.20    4.80 
   6  -1  11  160.88   10.10 
   6  -1  11  158.68   11.50 
   6   1  11  151.88   11.10 
   7  -2 -11  247.78   15.30 
   6  -2 -11   28.00    7.40 
   6   2 -11   16.50    5.00 
  -6   2  11   15.50    5.10 
   5  -2 -11  273.07   14.80 
  -5  -2  11  253.67   13.10 
  -5   2  11  286.37   12.80 
   5   2 -11  285.37   13.00 
   4  -2 -11    0.30    4.20 
  -4  -2  11   -3.70    3.20 
   4   2 -11    0.30    2.90 
  -4   2  11   -2.00    2.90 
   3  -2 -11 1718.73   51.79 
  -3  -2  11 1666.83   49.99 
  -3   2  11 1735.03   49.60 
   3   2 -11 1650.93   50.49 
   2  -2 -11   18.80    4.10 
  -2  -2  11   20.50    3.60 
  -2   2  11   12.80    3.00 
  -1  -2  11 1658.13   47.90 
   1  -2 -11 1633.44   49.30 
  -1   2  11 1663.23   47.50 
   0  -2 -11    8.00    2.90 
   0  -2  11   17.90    2.90 
   0   2  11   17.30    3.10 
   0   2  11   16.20    1.80 
   1  -2  11 1130.69   32.60 
   1  -2  11 1089.79   31.30 
   1   2  11 1123.39   33.30 
   2  -2  11  283.57   10.30 
   2   2  11  293.37   11.60 
   3  -2  11 1877.21   55.39 
   3   2  11 2009.60   57.29 
   4  -2  11   19.60    4.20 
   4  -2  11    9.20    5.00 
   4   2  11   21.20    5.50 
   5  -2  11  199.78   12.80 
   5  -2  11  218.38   10.30 
   5   2  11  202.18   11.60 
   6  -2  11   40.30    8.10 
   6   2  11   59.19    8.90 
   7  -3 -11   25.30    8.00 
   6  -3 -11  659.83   26.00 
  -6   3  11  607.44   23.00 
   5  -3 -11    3.40    5.30 
   5   3 -11    8.70    4.00 
  -5   3  11   16.90    4.70 
  -4  -3  11  858.21   29.30 
   4  -3 -11  915.61   31.30 
  -4   3  11  890.71   28.30 
  -3  -3  11   64.79    6.50 
   3  -3 -11   59.99    7.20 
  -3   3  11   59.39    4.90 
   2  -3 -11 1481.15   46.30 
  -2  -3  11 1556.14   44.60 
  -2   3  11 1482.05   44.10 
   1  -3 -11   98.99    7.40 
  -1  -3  11  106.29    6.00 
  -1   3  11  116.39    5.80 
   0  -3 -11  987.10   31.30 
   0  -3  11  953.50   29.90 
   0   3 -11 1012.60   28.90 
   0   3  11 1018.10   28.70 
   0   3  11 1021.60   30.10 
   1  -3  11   18.70    2.90 
   1   3  11   24.40    3.90 
   2  -3  11 1003.30   29.60 
   2   3  11 1005.60   31.40 
   3  -3  11   19.80    3.50 
   3   3  11   14.30    5.20 
   4  -3  11  199.38   12.30 
   4  -3  11  204.48    9.10 
   4   3  11  202.98   11.10 
   5  -3  11   18.00    7.20 
   5   3  11   20.10    6.50 
   6  -3  11  233.98   14.60 
   6   3  11  216.28   13.30 
   6  -4 -11   49.40    9.00 
  -6   4  11   52.59    7.10 
   5  -4 -11  524.55   22.40 
  -5   4  11  490.25   18.50 
   4  -4 -11    4.80    4.90 
  -4   4  11    6.40    3.40 
  -3  -4  11  515.45   18.70 
   3  -4 -11  532.55   20.60 
  -3   4  11  518.35   17.80 
  -2  -4  11   27.60    4.50 
   2  -4 -11   11.50    4.70 
  -2   4  11   22.90    3.60 
  -1  -4  11 1268.97   37.50 
   1  -4 -11 1230.28   39.60 
   1   4 -11 1301.67   36.90 
  -1   4  11 1258.67   37.30 
   0  -4  11   15.50    3.00 
   0  -4 -11   17.20    4.00 
   0   4  11   16.90    2.70 
   0   4 -11   12.30    2.60 
   0   4  11   16.90    3.30 
  -1  -4 -11  818.12   25.00 
   1  -4  11  722.83   23.60 
   1   4  11  795.92   25.00 
   2  -4  11   61.09    4.30 
   2   4  11   74.99    7.00 
   3  -4  11  501.75   20.90 
   3  -4  11  558.84   17.00 
   3   4  11  520.25   19.60 
   4  -4  11   -1.50    5.30 
   4   4  11    2.00    5.70 
   5  -4  11  390.26   19.40 
   5   4  11  404.46   17.90 
   6  -5 -11  143.39   13.80 
   5  -5 -11   21.70    7.40 
  -5   5  11   22.00    5.20 
   4  -5 -11  526.65   22.20 
  -4   5  11  556.94   18.90 
   3  -5 -11  126.29    9.90 
  -3   5  11  125.29    7.20 
   2  -5 -11  795.22   28.40 
  -2  -5  11  799.82   26.10 
  -2   5  11  834.82   25.50 
   1  -5 -11   -1.70    3.40 
  -1  -5  11    3.50    2.40 
   1   5 -11    2.20    2.80 
  -1   5  11    4.00    3.00 
  -1   5  11   -0.30    2.50 
   0  -5  11  505.05   16.20 
   0  -5 -11  493.95   18.40 
   0   5  11  491.55   16.40 
   0   5 -11  487.25   16.70 
   0   5  11  505.25   17.10 
   1  -5  11   29.40    3.50 
  -1  -5 -11   30.80    4.40 
   1   5  11   27.80    4.80 
   2  -5  11  399.76   15.50 
   2   5  11  404.46   15.70 
   3  -5  11   10.30    5.30 
   3   5  11    0.80    5.00 
   4  -5  11  454.35   21.60 
   4   5  11  458.85   19.00 
   5  -5  11   15.20    7.50 
   5   5  11   32.50    8.00 
   6  -6 -11    4.90    7.20 
   5  -6 -11  212.08   14.60 
   4  -6 -11   11.00    6.30 
   3  -6 -11  654.93   25.00 
  -3   6  11  645.94   21.40 
   2  -6 -11  110.69    9.40 
  -2   6  11  123.19    7.00 
   1  -6 -11  481.45   19.20 
  -1  -6  11  481.95   16.80 
  -1   6  11  489.45   17.30 
   1   6 -11  511.25   17.70 
  -1   6  11  501.65   16.90 
   0  -6  11   29.40    3.70 
   0  -6 -11   30.30    5.50 
   0   6  11   29.40    4.80 
   0   6  11   38.80    5.10 
   0   6 -11   27.50    4.60 
  -1  -6 -11  903.21   29.90 
   1   6  11  953.50   29.40 
   1   6  11  954.20   30.00 
   2  -6  11    5.20    4.90 
   2   6  11    2.30    4.40 
   3  -6  11  206.68   12.80 
   3   6  11  191.88   11.30 
   4  -6  11    9.00    6.50 
   4   6  11   27.10    7.50 
   5  -6  11  272.57   17.20 
   5   6  11  262.67   15.10 
   5  -7 -11   30.10    8.60 
   4  -7 -11  216.48   14.30 
   3  -7 -11    0.40    6.00 
   2  -7 -11  261.17   14.60 
   2   7 -11  283.17   12.60 
  -2   7  11  264.57   11.00 
   1  -7 -11   -1.90    4.40 
  -1   7  11    2.10    3.30 
   1   7 -11    4.40    4.40 
  -1   7  11    5.40    4.30 
   0  -7 -11   47.00    6.90 
   0   7 -11   48.10    6.10 
   0   7  11   46.90    5.80 
   0   7  11   39.90    5.20 
   1  -7  11   80.79    9.60 
   1   7  11   97.89    7.50 
   1   7  11   83.09    7.50 
   2  -7  11  245.08   14.10 
   2   7  11  229.68   11.80 
   3  -7  11   13.30    6.80 
   3   7  11    9.80    6.00 
   4  -7  11  212.38   15.90 
   4   7  11  193.48   13.20 
   4  -8 -11   47.70    9.20 
   3  -8 -11   76.89   10.20 
   2  -8 -11   10.60    6.20 
   2   8 -11   21.10    5.70 
  -1  -8  11  177.78   11.30 
   1  -8 -11  158.38   11.30 
   1   8 -11  179.48   10.30 
  -1   8  11  187.38   10.00 
  -1   8  11  167.78    8.90 
   0  -8 -11   24.70    6.50 
   0  -8  11   14.40    6.10 
   0   8  11   33.30    6.10 
   0   8 -11   22.50    5.30 
   0   8  11   23.60    4.90 
   1  -8  11   14.90    6.00 
   1   8  11   20.70    5.40 
   1   8  11   10.60    4.90 
   2  -8  11    1.60    5.80 
   2   8  11    9.70    5.60 
   2   8  11    2.80    5.90 
   3  -8  11  224.58   16.20 
   3   8  11  227.48   13.20 
   3  -9 -11   18.80    7.40 
   3   9 -11   18.40    7.70 
   2  -9 -11  150.38   12.40 
   2   9 -11  150.88   11.40 
  -1  -9  11   12.70    5.60 
   1  -9 -11   12.10    5.90 
   1   9 -11    8.90    5.30 
  -1   9  11   12.20    5.50 
   0  -9  11  372.06   18.20 
   0   9 -11  353.06   16.90 
   0   9  11  375.36   16.00 
   1  -9  11    6.90    6.00 
   1   9  11   14.20    5.40 
   1   9  11    6.60    5.90 
   2  -9  11  156.18   13.70 
   2   9  11  153.28   10.10 
   2   9  11  153.88   11.40 
   7   0 -12    2.10    5.80 
   6   0 -12   95.59    9.30 
   5   0 -12   -1.80    3.70 
  -5   0  12   -0.60    4.20 
  -4   0  12 1880.11   55.99 
   4   0 -12 1892.61   57.19 
   3   0 -12   15.90    4.40 
  -3   0  12    1.20    2.80 
   2   0 -12 1268.57   38.80 
  -2   0  12 1229.58   37.40 
  -1   0  12    7.80    2.70 
   0   0  12 1977.60   56.19 
   2   0  12  583.04   19.10 
   3   0  12   -5.90    3.20 
   4   0  12   85.29    7.90 
   5   0  12    1.40    4.20 
   5   0  12   -6.40    4.40 
   6   0  12    2.90    6.00 
   7  -1 -12  181.98   13.80 
   7   1 -12  194.88   17.80 
   6  -1 -12   13.60    5.90 
   6   1 -12   23.60    5.80 
  -6   1  12   17.60    5.50 
  -5  -1  12  245.08   12.40 
   5  -1 -12  237.18   13.60 
   5   1 -12  244.28   12.20 
  -5   1  12  236.68   12.10 
  -4  -1  12   -0.70    3.50 
   4  -1 -12   10.20    4.90 
  -4   1  12   -3.20    3.20 
   4   1 -12    2.80    3.80 
   3  -1 -12  892.31   30.40 
  -3  -1  12  927.61   29.10 
  -3   1  12  928.81   28.80 
   3   1 -12  909.21   29.90 
  -2  -1  12    7.90    3.00 
   2  -1 -12   21.60    4.20 
  -2   1  12   13.60    3.20 
   2   1 -12   21.50    3.90 
  -1  -1  12 1490.85   45.40 
   1  -1 -12 1519.15   46.80 
  -1   1  12 1667.83   45.50 
   0  -1  12   15.40    2.80 
   1  -1  12 1407.26   39.70 
   1  -1  12 1459.05   41.80 
   1   1  12 1462.75   42.10 
   2  -1  12    8.80    2.80 
   2   1  12   10.70    3.30 
   3  -1  12  732.23   23.40 
   3   1  12  715.83   24.00 
   4  -1  12   -2.30    4.30 
   4  -1  12   -2.50    3.20 
   4   1  12    8.00    5.00 
   5  -1  12  144.69    8.90 
   5  -1  12  135.09    9.60 
   5   1  12  131.49    9.70 
   6  -1  12    2.60    4.50 
   6  -1  12    1.90    5.70 
   6   1  12    4.30    5.60 
   7  -2 -12   46.20    8.90 
   6  -2 -12  166.08   13.20 
  -6   2  12  182.68   10.70 
   6   2 -12  182.78   10.90 
   5  -2 -12   -0.20    4.90 
  -5  -2  12   -0.10    4.30 
   5   2 -12    9.00    4.40 
  -5   2  12    7.10    4.00 
   4  -2 -12  376.76   16.80 
  -4  -2  12  358.86   15.30 
   4   2 -12  401.16   15.90 
  -4   2  12  380.56   14.80 
   3  -2 -12  411.46   17.40 
  -3  -2  12  438.06   16.20 
   3   2 -12  434.36   16.90 
  -3   2  12  438.56   15.60 
   2  -2 -12 1280.87   39.60 
  -2  -2  12 1297.07   37.90 
  -2   2  12 1192.68   37.50 
   1  -2 -12   21.50    4.30 
  -1  -2  12   26.70    4.00 
  -1   2  12   26.90    3.60 
   0  -2 -12 5082.19  140.59 
   0  -2  12 4853.61  138.99 
   0   2  12 5109.79  136.99 
   0   2  12 5113.39  139.09 
   1  -2  12   24.60    2.10 
   1  -2  12   25.40    3.20 
   1   2  12   28.70    4.00 
   2  -2  12  950.50   28.70 
   2   2  12  957.50   29.80 
   3  -2  12  382.66   14.10 
   3   2  12  408.76   15.60 
   4  -2  12 1003.60   31.10 
   4  -2  12 1011.10   34.40 
   4   2  12  987.70   32.60 
   5  -2  12    1.90    4.00 
   5  -2  12    4.20    5.20 
   5   2  12    7.30    5.40 
   6  -2  12  321.97   16.60 
   6   2  12  294.37   15.70 
   7  -3 -12  272.07   17.30 
   6  -3 -12   10.40    6.60 
  -6   3  12    3.70    4.80 
   5  -3 -12  450.85   20.20 
   5   3 -12  446.16   18.00 
  -5   3  12  464.75   17.70 
  -4  -3  12   21.10    5.60 
   4  -3 -12   16.50    5.80 
  -4   3  12   21.70    4.60 
  -3  -3  12 1357.36   40.90 
   3  -3 -12 1291.37   42.50 
  -3   3  12 1344.47   40.10 
   2  -3 -12   -0.20    3.70 
  -2  -3  12    3.90    2.90 
  -2   3  12    5.40    2.80 
  -1  -3  12 1169.18   35.20 
   1  -3 -12 1164.88   37.00 
   1   3 -12 1208.18   33.70 
  -1   3  12 1144.89   34.90 
   0  -3 -12    0.70    2.90 
   0  -3  12    2.30    2.60 
   0   3  12    5.80    2.80 
   0   3  12    4.70    1.70 
   1  -3  12  755.72   23.40 
   1   3  12  758.02   24.20 
   2  -3  12  101.99    5.40 
   2   3  12   93.99    6.80 
   3  -3  12  945.61   29.30 
   3   3  12  995.40   31.50 
   4  -3  12   -5.30    5.20 
   4  -3  12   -1.10    3.20 
   4   3  12   -6.30    4.60 
   5  -3  12  346.87   18.40 
   5   3  12  350.16   16.60 
   6  -3  12   20.50    8.00 
   6   3  12   26.10    7.40 
   6  -4 -12  455.55   21.50 
  -6   4  12  433.16   18.00 
   5  -4 -12    5.10    6.30 
  -5   4  12   11.20    4.40 
  -4  -4  12  600.94   22.60 
   4  -4 -12  607.84   24.40 
  -4   4  12  676.23   21.70 
   3  -4 -12   30.00    6.20 
  -3  -4  12   30.40    5.00 
  -3   4  12   35.10    4.60 
  -2  -4  12 1101.89   33.00 
   2  -4 -12 1004.50   34.70 
  -2   4  12 1065.49   32.40 
   1  -4 -12   13.30    4.60 
  -1  -4  12   10.80    3.30 
  -1   4  12   14.80    3.20 
   1   4 -12   13.30    2.80 
   0  -4  12  506.85   16.70 
   0  -4 -12  500.25   18.50 
   0   4 -12  490.75   16.10 
   0   4  12  511.85   15.90 
   0   4  12  489.85   17.00 
  -1  -4 -12   19.00    3.70 
   1  -4  12   17.90    3.20 
   1   4  12    7.00    3.80 
   2  -4  12  949.80   29.00 
   2   4  12  988.70   31.00 
   3  -4  12   37.80    4.10 
   3  -4  12   44.20    7.10 
   3   4  12   46.50    6.80 
   4  -4  12  241.08   14.30 
   4   4  12  255.87   13.10 
   5  -4  12   26.00    7.40 
   5   4  12   25.60    7.00 
   6  -5 -12   -2.70    7.00 
   5  -5 -12  460.95   21.50 
  -5   5  12  476.95   18.10 
   4  -5 -12   39.40    7.70 
  -4   5  12   49.20    5.70 
   3  -5 -12  569.14   22.20 
  -3  -5  12  531.75   19.70 
  -3   5  12  534.35   18.80 
  -2  -5  12   82.59    6.50 
   2  -5 -12   92.79    9.30 
  -2   5  12  103.79    6.50 
  -1  -5  12  727.33   23.20 
   1  -5 -12  687.03   25.30 
  -1   5  12  745.03   23.20 
   1   5 -12  734.23   23.10 
   0  -5 -12  146.09    8.60 
   0  -5  12  138.99    6.80 
   0   5  12  138.79    7.40 
   0   5  12  132.89    6.90 
   0   5 -12  132.89    7.00 
   1  -5  12 1345.47   39.20 
  -1  -5 -12 1322.97   40.90 
   1   5  12 1340.47   40.80 
   1   5  12 1387.26   39.80 
   2   5  12   84.39    8.40 
   3  -5  12  308.87   15.50 
   3   5  12  279.27   14.10 
   4  -5  12    9.40    6.90 
   4   5  12    7.60    5.80 
   5  -5  12  339.27   19.10 
   5   5  12  353.46   17.70 
   5  -6 -12   25.50    8.60 
   4  -6 -12  194.48   13.30 
   3  -6 -12    3.80    5.40 
  -3   6  12    8.60    3.70 
   2  -6 -12  496.25   20.80 
  -2  -6  12  513.65   18.40 
  -2   6  12  537.75   18.00 
   1  -6 -12   15.80    5.10 
  -1  -6  12   35.70    4.50 
  -1   6  12   28.70    4.70 
   1   6 -12   33.30    4.90 
  -1   6  12   33.20    4.80 
   0  -6 -12   45.10    6.40 
   0  -6  12   45.00    4.00 
   0   6 -12   50.09    5.40 
   0   6  12   37.50    5.00 
   0   6  12   47.00    5.40 
  -1  -6 -12    4.50    3.60 
   1   6  12   10.40    4.80 
   1   6  12   10.50    4.10 
   2  -6  12  374.96   18.00 
   2   6  12  369.86   15.50 
   3  -6  12   15.10    6.50 
   3   6  12   10.60    6.00 
   4  -6  12  171.38   13.30 
   4   6  12  163.98   12.20 
   5  -7 -12  221.98   15.70 
   4  -7 -12    6.00    7.10 
   3  -7 -12  110.19   10.50 
   2  -7 -12   -0.90    4.80 
   2   7 -12    4.90    4.10 
  -2   7  12    4.60    3.40 
   1  -7 -12  177.58   11.70 
  -1   7  12  200.18    9.30 
   1   7 -12  189.58    9.90 
  -1   7  12  191.18    9.80 
   0  -7 -12  152.38   10.50 
   0   7  12  174.38    9.20 
   0   7  12  170.78    9.10 
   0   7 -12  158.98    9.30 
   1  -7  12   89.19    9.60 
   1   7  12   95.99    7.40 
   1   7  12   85.99    7.10 
   2  -7  12    4.20    5.50 
   2   7  12    4.10    4.90 
   3  -7  12  132.29   11.70 
   3   7  12  123.29    9.80 
   4  -7  12   68.29   11.50 
   4   7  12   86.59   10.70 
   4  -8 -12  116.49   13.30 
   3  -8 -12    8.70    6.40 
   2  -8 -12  151.48   11.40 
   2   8 -12  149.69   10.40 
   1  -8 -12    8.60    5.70 
  -1   8  12   15.50    4.20 
  -1   8  12   21.70    5.20 
   1   8 -12   13.80    4.80 
   0  -8  12  288.87   15.50 
   0   8  12  301.27   13.10 
   0   8 -12  284.77   13.90 
   0   8  12  307.67   13.10 
   1  -8  12    1.00    6.10 
   1   8  12    6.70    5.10 
   1   8  12    1.10    4.40 
   2  -8  12  243.58   14.70 
   2   8  12  218.08   12.40 
   2   8  12  228.58   12.20 
   3  -8  12    5.40    6.70 
   3   8  12   18.80    7.00 
   2  -9 -12    2.50    5.30 
   2   9 -12    2.80    5.90 
  -1  -9  12  106.99    9.90 
   1   9 -12  100.29    9.90 
   0  -9  12   31.40    7.10 
   0   9 -12   37.50    7.30 
   0   9  12   39.70    6.80 
   1  -9  12  144.19   12.80 
   1   9  12  140.99    9.20 
   1   9  12  152.38   10.70 
   7   0 -13  301.97   16.70 
   6   0 -13    0.40    4.80 
  -6   0  13   -7.30    3.90 
  -5   0  13  165.28   10.10 
   5   0 -13  177.38   11.30 
  -4   0  13    3.00    3.70 
   4   0 -13    3.30    3.80 
  -3   0  13  723.83   23.70 
   3   0 -13  707.33   24.90 
  -2   0  13   -2.40    2.30 
   2   0 -13    0.30    2.60 
  -1   0  13 3106.79   87.49 
   0   0  13    9.60    2.80 
   1   0  13  420.66   14.50 
   2   0  13   -2.00    2.80 
   3   0  13  839.32   26.90 
   4   0  13   -3.90    3.70 
   5   0  13  178.88   10.30 
   5   0  13  189.68   11.40 
   6   0  13    3.10    5.40 
   7  -1 -13   11.40    7.00 
   7   1 -13    9.70    6.40 
   6  -1 -13  153.78   11.50 
  -6   1  13  146.49   10.50 
   6   1 -13  168.38   11.00 
  -5  -1  13   14.30    5.20 
   5  -1 -13   21.00    6.00 
   5   1 -13   19.20    5.30 
  -5   1  13   22.10    5.00 
   4  -1 -13 1521.05   48.90 
  -4  -1  13 1469.75   47.20 
  -4   1  13 1572.74   47.00 
   4   1 -13 1665.03   48.60 
  -3  -1  13    3.40    3.30 
   3  -1 -13    0.70    3.30 
  -3   1  13    4.20    3.20 
   3   1 -13    4.50    3.50 
   2  -1 -13 1535.25   45.80 
  -2  -1  13 1536.95   44.20 
   2   1 -13 1480.55   45.40 
  -2   1  13 1381.56   43.90 
  -1  -1  13   36.50    4.40 
   1  -1 -13   30.90    4.80 
  -1   1  13   38.30    4.20 
   1   1 -13   28.70    1.40 
   0  -1  13 1319.37   39.10 
   0   1  13 1336.87   39.10 
   1  -1  13   19.40    1.50 
   1  -1  13   13.90    2.90 
   1   1  13   23.40    3.70 
   2  -1  13  438.56   15.00 
   2   1  13  430.46   15.50 
   3  -1  13  121.19    7.20 
   3   1  13  104.39    7.30 
   4  -1  13  214.48   10.40 
   4   1  13  200.08   10.70 
   5  -1  13    3.90    5.10 
   5  -1  13    4.20    4.60 
   5   1  13   -7.00    4.30 
   6  -1  13  114.19    9.20 
   6  -1  13  129.39   14.10 
   6   1  13  116.69    9.70 
   7  -2 -13   71.19   10.20 
   6  -2 -13   73.09   10.10 
  -6   2  13   82.09    8.70 
   6   2 -13   70.89    8.30 
   5  -2 -13  458.85   20.20 
  -5  -2  13  434.36   18.70 
   5   2 -13  480.85   18.70 
  -5   2  13  446.86   17.70 
  -4  -2  13   21.20    5.20 
   4  -2 -13   22.70    5.80 
  -4   2  13   20.70    4.50 
   4   2 -13   17.40    4.90 
  -3  -2  13  886.11   28.80 
   3  -2 -13  900.31   30.70 
  -3   2  13  891.01   28.30 
  -2  -2  13   48.50    5.30 
   2  -2 -13   35.50    5.60 
  -2   2  13   35.10    4.50 
  -1  -2  13 1460.55   44.20 
   1  -2 -13 1482.95   45.70 
   1   2 -13 1515.25   41.60 
  -1   2  13 1528.05   44.00 
   0  -2 -13  205.98   10.10 
   0  -2  13  188.78    8.50 
   0   2  13  208.18    6.60 
   1  -2  13 1369.26   40.10 
   1   2  13 1373.96   40.70 
   2  -2  13    3.50    2.80 
   2   2  13   -1.90    3.30 
   3  -2  13  723.13   22.90 
   3   2  13  691.33   24.10 
   4  -2  13    9.90    4.10 
   4  -2  13   -2.40    5.80 
   4   2  13    9.90    5.20 
   5  -2  13  159.78   11.40 
   5  -2  13  161.28    9.10 
   5   2  13  151.98   11.10 
   6  -2  13    3.40    6.50 
   6   2  13   -1.20    5.60 
   6  -3 -13  358.86   19.00 
  -6   3  13  376.96   16.60 
   5  -3 -13    9.80    6.10 
  -5  -3  13   -4.60    4.20 
  -5   3  13    8.80    4.10 
   4  -3 -13  222.98   13.30 
  -4  -3  13  223.18   11.70 
  -4   3  13  260.17   11.30 
  -3  -3  13  303.97   13.10 
   3  -3 -13  293.07   14.50 
  -3   3  13  299.47   12.30 
  -2  -3  13 1001.40   30.80 
   2  -3 -13  969.00   32.70 
  -2   3  13  973.50   30.50 
  -1  -3  13  146.99    7.60 
   1  -3 -13  163.48    9.30 
   1   3 -13  154.78    6.20 
  -1   3  13  160.58    7.60 
   0  -3  13 1485.15   45.10 
   0  -3 -13 1564.24   46.80 
   0   3  13 1549.14   43.30 
   0   3  13 1572.44   45.30 
   1  -3  13   16.70    3.30 
   1   3  13   18.70    4.20 
   2  -3  13 1281.37   37.80 
   2   3  13 1288.97   39.50 
   3  -3  13  348.17   13.20 
   3   3  13  376.36   15.30 
   4  -3  13  655.53   21.40 
   4  -3  13  621.24   25.20 
   4   3  13  665.33   23.80 
   5  -3  13   15.10    6.70 
   5   3  13    6.10    5.80 
   6  -4 -13    4.00    6.70 
  -6   4  13   12.60    5.20 
   5  -4 -13  396.16   19.50 
  -5   4  13  397.46   16.10 
   4  -4 -13   21.50    6.30 
  -4  -4  13   15.00    5.00 
  -4   4  13   22.70    4.40 
   3  -4 -13 1332.27   43.20 
  -3  -4  13 1345.57   41.10 
  -3   4  13 1288.97   40.00 
   2  -4 -13   30.40    6.30 
  -2  -4  13   33.70    4.90 
  -2   4  13   41.70    5.40 
  -1  -4  13 1156.58   35.40 
   1  -4 -13 1177.38   37.70 
  -1   4  13 1159.98   35.20 
   1   4 -13 1171.68   34.30 
   0  -4 -13  242.38   11.50 
   0  -4  13  256.57   10.20 
   0   4 -13  228.28    9.10 
   0   4  13  257.27   10.50 
   0   4  13  248.68    9.10 
   1  -4  13 1055.19   33.00 
   1   4  13 1146.59   34.20 
   2  -4  13  150.88    7.40 
   2   4  13  157.58    9.10 
   3  -4  13  563.24   20.00 
   3   4  13  577.84   21.30 
   4  -4  13   33.20    7.70 
   4   4  13   42.50    7.40 
   5  -4  13  374.66   19.50 
   5   4  13  365.26   17.80 
   6  -5 -13  219.68   16.40 
   5  -5 -13   30.40    8.20 
  -5   5  13   28.90    5.70 
   4  -5 -13  416.06   19.90 
  -4   5  13  417.46   15.80 
   3  -5 -13    6.50    5.20 
  -3  -5  13   -4.20    3.30 
  -3   5  13    2.20    3.20 
  -2  -5  13  568.24   20.00 
   2  -5 -13  540.85   22.00 
  -2   5  13  588.24   19.60 
   1  -5 -13   13.30    5.10 
  -1  -5  13   13.20    3.60 
   1   5 -13   18.30    3.40 
  -1   5  13   14.30    3.60 
   0  -5  13  117.29    6.30 
   0  -5 -13  112.69    8.20 
   0   5  13  114.99    6.20 
   0   5  13  115.49    7.40 
   0   5 -13  110.49    6.20 
   1  -5  13   18.20    3.40 
  -1  -5 -13   16.00    4.00 
   1   5  13   13.80    4.40 
   1   5  13   19.20    3.90 
   2   5  13  515.85   19.50 
   3  -5  13   -3.60    5.20 
   3   5  13   -8.60    4.60 
   4  -5  13  295.27   17.00 
   4   5  13  307.57   15.10 
   5  -5  13   23.40    8.30 
   5   5  13   39.40    8.50 
   5  -6 -13  270.77   17.50 
   4  -6 -13    3.90    6.70 
  -4   6  13   -1.20    4.20 
   3  -6 -13  150.08   11.30 
  -3   6  13  137.99    8.10 
   2  -6 -13    0.60    5.50 
  -2  -6  13   -3.00    3.40 
  -2   6  13    6.70    3.30 
  -1  -6  13   97.59    6.20 
   1  -6 -13   93.69    8.80 
  -1   6  13   96.69    6.80 
   1   6 -13   88.79    6.80 
   0  -6 -13  334.17   14.70 
   0  -6  13  320.87   11.80 
   0   6  13  304.17   13.00 
   0   6  13  315.87   12.30 
   0   6 -13  296.87   12.60 
  -1  -6 -13  342.57   14.50 
   1   6  13  347.67   14.30 
   1   6  13  354.26   13.30 
   2  -6  13    8.20    5.40 
   2   6  13    5.40    5.00 
   3  -6  13   74.79   10.10 
   3   6  13   76.09    9.10 
   4  -6  13   24.00    8.20 
   4   6  13   41.30    8.70 
   4  -7 -13  156.48   13.20 
   3  -7 -13   -3.00    6.10 
   2  -7 -13  185.38   12.70 
  -2   7  13  194.98    9.40 
   2   7 -13  192.38   10.60 
   1  -7 -13   43.00    7.40 
   1   7 -13   55.29    6.60 
  -1   7  13   58.79    6.10 
   0  -7 -13  288.67   13.90 
   0   7 -13  263.37   12.30 
   0   7  13  280.27   11.90 
   0   7  13  295.27   12.70 
   1  -7  13   -1.20    5.10 
   1   7  13    3.50    4.60 
   1   7  13    4.60    4.30 
   2  -7  13  310.07   16.20 
   2   7  13  290.27   14.20 
   2   7  13  275.47   12.80 
   3  -7  13   13.40    7.00 
   3   7  13    6.10    6.10 
   3  -8 -13  149.99   13.30 
   2  -8 -13    8.50    6.30 
   2   8 -13    4.10    5.40 
   1  -8 -13  198.78   12.50 
  -1   8  13  224.88   10.60 
   1   8 -13  229.88   12.00 
   0  -8  13   52.99    8.10 
   0   8 -13   37.80    6.50 
   0   8  13   45.30    6.60 
   0   8  13   50.39    6.70 
   1  -8  13  209.28   13.40 
   1   8  13  222.98   11.30 
   1   8  13  213.18   11.10 
   2  -8  13    8.20    6.80 
   2   8  13   -3.40    5.50 
   2   8  13    1.80    5.20 
   2  -9 -13  157.78   12.80 
   2   9 -13  138.39   11.00 
  -1  -9  13   13.30    6.50 
   1   9 -13   25.00    6.60 
   0  -9  13  116.49   11.40 
   0   9 -13  108.29    9.20 
   0   9  13  102.29    8.60 
   1  -9  13    0.50    6.70 
   1   9  13    8.50    6.10 
   1   9  13   -3.00    5.30 
   7   0 -14    6.30    5.10 
  -6   0  14  225.38   12.90 
   6   0 -14  254.97   13.70 
   5   0 -14    0.00    4.40 
  -5   0  14   -2.10    3.80 
  -4   0  14 1179.18   37.20 
   4   0 -14 1180.68   38.50 
   3   0 -14    1.50    3.30 
  -3   0  14    5.50    3.40 
   2   0 -14 1129.29   35.80 
  -2   0  14 1101.99   34.40 
  -1   0  14   11.50    3.10 
   0   0  14 2030.70   58.19 
   1   0  14    0.30    2.30 
   2   0  14  795.52   25.40 
   3   0  14    0.70    3.30 
   4   0  14  204.78   10.90 
   5   0  14   -5.80    4.10 
   5   0  14    1.20    4.80 
   7  -1 -14  268.77   15.80 
   7   1 -14  259.77   15.60 
   6  -1 -14    5.70    5.40 
  -6  -1  14    8.00    5.30 
   6   1 -14   10.40    4.80 
  -6   1  14   14.00    5.50 
   5  -1 -14  274.27   14.90 
  -5  -1  14  295.07   14.20 
   5   1 -14  316.87   14.70 
  -5   1  14  286.47   13.50 
   4  -1 -14   12.40    5.00 
  -4  -1  14   13.30    4.60 
  -4   1  14   12.50    4.40 
   4   1 -14   19.50    5.20 
   3  -1 -14 1217.68   39.20 
  -3  -1  14 1219.58   37.50 
  -3   1  14 1209.58   37.30 
   3   1 -14 1204.68   38.90 
   2  -1 -14   49.70    2.90 
   2  -1 -14   51.79    6.40 
  -2  -1  14   53.59    5.60 
  -2   1  14   39.10    5.00 
  -1  -1  14 1150.78   36.30 
   1  -1 -14 1186.08   37.90 
  -1   1  14 1269.67   36.40 
   0  -1  14    1.50    2.30 
   0   1  14    9.60    2.80 
   1  -1  14  753.62   23.40 
   1   1  14  731.83   23.60 
   2  -1  14   -0.50    2.90 
   2   1  14    2.10    3.20 
   3  -1  14  357.66   13.80 
   3   1  14  369.56   14.80 
   4  -1  14    9.30    4.60 
   4   1  14   10.10    5.00 
   5  -1  14  287.47   15.20 
   5  -1  14  277.97   12.70 
   5   1  14  252.77   13.30 
   7  -2 -14   20.70    7.30 
   6  -2 -14  257.57   15.70 
   6   2 -14  261.57   13.50 
  -6   2  14  284.47   14.10 
  -5  -2  14    0.50    4.80 
   5  -2 -14   18.10    6.90 
  -5   2  14   17.60    5.30 
   5   2 -14    9.60    4.80 
  -4  -2  14  785.02   27.30 
   4  -2 -14  808.32   29.10 
  -4   2  14  792.22   26.40 
   4   2 -14  805.52   28.00 
   3  -2 -14   35.00    6.30 
  -3  -2  14   44.40    5.80 
  -3   2  14   39.90    5.50 
   2  -2 -14 1311.07   40.60 
  -2  -2  14 1304.77   38.70 
   2  -2 -14 1274.07   38.50 
  -2   2  14 1193.08   38.40 
  -1  -2  14   25.80    4.20 
   1  -2 -14   21.80    4.70 
  -1   2  14   28.10    4.00 
   1   2 -14   19.80    1.80 
   0  -2 -14 1245.48   38.60 
   0  -2  14 1174.38   36.90 
   0   2  14 1289.77   37.10 
   1  -2  14    0.80    2.30 
   1   2  14    7.00    3.30 
   2  -2  14  247.18    9.90 
   2   2  14  238.78   10.90 
   3  -2  14   56.79    5.80 
   3   2  14   60.09    7.20 
   4  -2  14  418.96   15.80 
   4   2  14  423.06   17.70 
   5  -2  14   68.59    9.30 
   5  -2  14   79.49    7.90 
   5   2  14   68.89    8.80 
   6  -3 -14   48.30    9.20 
  -6   3  14   39.20    6.90 
   5  -3 -14  516.05   23.50 
  -5  -3  14  525.45   21.50 
  -5   3  14  583.84   20.70 
  -4  -3  14  175.58   10.80 
   4  -3 -14  182.88   12.30 
  -4   3  14  189.98    9.60 
   3  -3 -14  876.01   31.10 
  -3  -3  14  904.71   29.20 
  -3   3  14  878.71   28.50 
   2  -3 -14    3.80    4.10 
  -2  -3  14    3.30    3.30 
  -2   3  14    6.30    3.70 
   1  -3 -14 1599.94   48.10 
  -1  -3  14 1570.04   46.00 
   1   3 -14 1487.65   43.70 
  -1   3  14 1557.34   45.70 
   0  -3 -14  101.89    7.60 
   0  -3  14  104.59    6.70 
   0   3  14  119.89    5.00 
   0   3  14  130.99    7.10 
   1  -3  14  900.71   28.10 
   1   3  14  920.81   28.90 
   2  -3  14   96.09    5.90 
   2   3  14   92.79    7.10 
   3  -3  14 1053.19   32.10 
   3   3  14 1050.89   34.10 
   4  -3  14   32.10    6.10 
   4  -3  14   48.50    8.30 
   4   3  14   37.80    7.30 
   5  -3  14  144.09   12.10 
   5   3  14  154.08   11.00 
   6  -4 -14  219.38   15.20 
  -6   4  14  202.68   11.80 
   5  -4 -14   24.50    7.50 
  -5   4  14   18.40    5.30 
  -4  -4  14  224.58   12.00 
   4  -4 -14  214.88   13.80 
  -4   4  14  249.18   11.00 
  -3  -4  14  132.89    8.90 
   3  -4 -14  119.19   10.00 
  -3   4  14  127.89    8.10 
  -2  -4  14  644.64   21.90 
   2  -4 -14  612.94   23.70 
  -2   4  14  633.64   21.40 
   1  -4 -14  563.74   21.10 
  -1  -4  14  556.94   19.20 
   1   4 -14  546.55   17.70 
  -1   4  14  560.34   19.00 
   0  -4  14 1198.28   35.00 
   0  -4 -14 1141.79   36.80 
   0   4  14 1106.59   33.20 
   0   4  14 1146.69   35.10 
   1  -4  14    8.70    3.20 
   1   4  14   16.70    4.30 
   1   4  14    7.70    3.00 
   2  -4  14 1108.29   33.90 
   2   4  14 1145.59   35.80 
   3   4  14  143.79    9.70 
   4  -4  14  290.27   16.50 
   4   4  14  302.17   14.80 
   5  -4  14   18.10    7.70 
   5   4  14   29.40    8.00 
   6  -5 -14   25.50    8.80 
   5  -5 -14  259.67   16.50 
  -5   5  14  285.67   13.00 
  -4  -5  14   32.20    6.00 
   4  -5 -14   35.00    7.70 
  -4   5  14   39.00    5.60 
  -3  -5  14  329.57   14.40 
   3  -5 -14  329.97   16.50 
  -3   5  14  316.77   13.40 
   2  -5 -14    2.70    4.90 
  -2  -5  14    4.10    3.50 
  -2   5  14   10.20    4.00 
   1  -5 -14   85.49    8.40 
  -1  -5  14   86.49    6.20 
  -1   5  14   93.59    6.70 
   1   5 -14   89.89    5.80 
   0  -5 -14  253.47   12.40 
   0  -5  14  249.08   10.30 
   0   5  14  229.78   10.70 
   0   5  14  256.17    9.90 
  -1  -5 -14  408.36   16.00 
   1  -5  14  409.86   14.50 
   1   5  14  405.26   15.80 
   1   5  14  397.06   14.20 
   2   5  14   94.89    8.80 
   3  -5  14  107.19   10.10 
   3   5  14   94.29    8.60 
   4  -5  14    7.60    7.40 
   4   5  14    4.60    6.00 
   5  -6 -14    7.70    7.30 
   4  -6 -14  264.57   15.90 
  -4   6  14  263.47   13.00 
   3  -6 -14   20.60    6.70 
  -3   6  14   23.40    4.80 
   2  -6 -14  265.47   14.60 
  -2  -6  14  287.57   12.40 
  -2   6  14  300.67   12.40 
   2   6 -14  277.47   12.00 
  -1  -6  14   79.39    6.00 
   1  -6 -14   85.89    9.10 
   1   6 -14   65.09    6.00 
  -1   6  14   76.29    6.50 
   0  -6  14  289.77   11.20 
   0  -6 -14  287.47   13.70 
   0   6 -14  252.47   11.50 
   0   6  14  291.47   11.50 
   0   6  14  276.07   12.10 
  -1  -6 -14   13.10    4.10 
   1   6  14   11.90    4.90 
   1   6  14    3.00    4.00 
   2   6  14  419.36   17.20 
   3  -6  14   17.40    7.20 
   3   6  14   14.10    6.40 
   4  -6  14  324.47   18.80 
   4   6  14  332.17   17.00 
   4  -7 -14   18.10    7.80 
   3  -7 -14  126.89   11.40 
   2  -7 -14    2.20    5.60 
  -2   7  14   -3.00    3.50 
   2   7 -14   -1.00    3.90 
   1  -7 -14  349.17   16.90 
  -1   7  14  374.56   14.40 
   1   7 -14  331.57   14.20 
   0  -7 -14   26.90    5.90 
   0   7  14   17.70    4.90 
   0   7 -14   20.60    4.80 
   0   7  14   22.00    4.90 
   1   7  14  364.86   15.40 
   1   7  14  328.57   14.00 
   2  -7  14   22.80    7.10 
   2   7  14   11.70    5.50 
   2   7  14   17.80    6.70 
   3  -7  14  321.57   18.00 
   3   7  14  292.87   15.10 
   3  -8 -14    4.60    6.40 
   3   8 -14    6.50    5.20 
   2  -8 -14  158.98   12.00 
   2   8 -14  170.88   10.30 
   1  -8 -14    9.70    5.70 
   1   8 -14    8.50    4.60 
  -1   8  14    7.30    4.40 
   0  -8  14  187.58   12.30 
   0   8  14  170.08   10.20 
   0   8 -14  173.58   10.50 
   0   8  14  165.18    9.60 
   1  -8  14    5.20    5.90 
   1   8  14   12.90    4.80 
   1   8  14    4.20    5.40 
   2  -8  14  134.59   12.20 
   2   8  14  143.69   10.70 
   2   8  14  124.29    9.80 
  -1  -9  14  152.48   12.30 
   7   0 -15  290.97   16.50 
   6   0 -15    0.20    4.60 
  -6   0  15   -3.50    4.50 
  -5   0  15  224.38   12.10 
   5   0 -15  242.38   13.60 
  -4   0  15    5.80    4.60 
   4   0 -15    6.20    4.50 
  -3   0  15 2224.68   64.79 
   3   0 -15 2215.88   66.59 
  -2   0  15   -2.10    2.80 
   2   0 -15   -0.20    3.10 
  -1   0  15 1233.78   37.50 
   0   0  15   15.60    3.30 
   1   0  15  704.53   22.70 
   2   0  15    3.60    3.60 
   3   0  15  565.04   19.90 
   4   0  15    3.30    4.70 
   5   0  15  194.18   12.30 
   5   0  15  186.08   11.40 
   6  -1 -15  249.28   14.90 
  -6  -1  15  248.28   14.00 
  -6   1  15  279.07   14.30 
   6   1 -15  262.07   13.80 
   5  -1 -15   10.70    5.50 
  -5  -1  15   21.00    6.20 
  -5   1  15   18.40    5.20 
   5   1 -15   11.90    5.20 
   4  -1 -15 1008.30   34.70 
  -4  -1  15  997.40   33.20 
   4   1 -15 1028.60   34.20 
  -4   1  15 1047.90   33.00 
   3  -1 -15    6.00    4.10 
  -3  -1  15    7.60    3.80 
   3   1 -15    3.00    3.80 
  -3   1  15    5.40    3.80 
   2  -1 -15  802.12   26.60 
   2  -1 -15  733.83   21.60 
  -2  -1  15  772.32   24.90 
  -2   1  15  704.43   24.60 
   1  -1 -15   13.80    3.90 
  -1  -1  15   13.70    3.80 
  -1   1  15   10.90    3.20 
   0  -1  15  789.62   25.30 
   0   1  15  808.82   25.40 
   1  -1  15    3.10    3.00 
   1   1  15   -0.10    2.80 
   2  -1  15  574.04   19.40 
   2   1  15  570.94   19.80 
   3  -1  15    2.10    3.30 
   3   1  15    0.00    3.70 
   4  -1  15  468.55   17.50 
   4   1  15  459.35   18.30 
   5  -1  15   11.20    6.10 
   5  -1  15    5.30    5.20 
   5   1  15   10.70    5.70 
   6  -2 -15   44.40    8.70 
  -6  -2  15   33.30    7.40 
  -6   2  15   37.90    7.10 
   6   2 -15   29.70    6.70 
   5  -2 -15  598.94   25.10 
  -5  -2  15  573.24   23.00 
  -5   2  15  637.64   22.60 
   5   2 -15  600.64   23.00 
  -4  -2  15   92.19    7.90 
   4  -2 -15  100.79   10.10 
   4   2 -15  103.09    8.40 
  -4   2  15  110.19    7.60 
   3  -2 -15  775.82   28.00 
  -3  -2  15  784.92   26.20 
  -3   2  15  779.92   26.00 
   2  -2 -15    2.30    2.70 
  -2  -2  15   -3.60    2.90 
   2  -2 -15    0.70    3.60 
  -2   2  15    0.40    3.10 
   1  -2 -15 1950.10   58.79 
  -1  -2  15 1921.31   57.09 
  -1   2  15 2073.29   57.09 
   1   2 -15 1882.21   53.59 
   0  -2  15  180.68    8.80 
   0   2  15  199.18    9.00 
   1  -2  15  605.44   19.90 
   1   2  15  595.54   20.30 
   2  -2  15    2.60    3.10 
   2   2  15    1.00    3.70 
   3  -2  15  539.95   18.70 
   3   2  15  522.65   19.70 
   4  -2  15   17.90    4.40 
   4   2  15   18.20    5.90 
   5  -2  15  199.08   13.30 
   5   2  15  193.98   12.00 
   6  -3 -15  206.78   14.70 
  -6   3  15  215.58   12.50 
   5  -3 -15    1.70    5.70 
  -5  -3  15    8.60    5.10 
  -5   3  15    9.70    4.40 
  -4  -3  15  598.44   22.70 
   4  -3 -15  607.24   24.70 
  -4   3  15  634.44   21.70 
   3  -3 -15   42.20    7.10 
  -3  -3  15   41.80    6.10 
  -3   3  15   47.10    6.20 
   2  -3 -15  701.73   25.70 
  -2  -3  15  737.73   24.00 
  -2   3  15  688.53   23.60 
   1  -3 -15   16.60    4.80 
  -1  -3  15   13.20    3.70 
  -1   3  15   16.90    4.00 
   1   3 -15   19.10    2.50 
   0  -3  15  967.70   31.70 
   0  -3 -15 1019.40   33.50 
   0   3  15 1065.89   32.10 
   0   3  15 1051.39   29.40 
   1  -3  15    6.80    2.90 
   1   3  15    6.70    2.30 
   1   3  15   11.50    3.90 
   2  -3  15  166.98    7.90 
   2   3  15  136.39    8.80 
   3  -3  15   78.29    6.10 
   3   3  15   98.19    9.00 
   4  -3  15  326.17   17.20 
   4   3  15  314.37   15.00 
   5  -3  15   20.20    7.90 
   5   3  15   13.80    6.60 
   6  -4 -15   27.20    8.10 
  -6   4  15   39.00    6.80 
   5  -4 -15  144.29   13.50 
  -5  -4  15  149.39   10.70 
  -5   4  15  178.78   10.20 
   4  -4 -15   -1.40    5.20 
  -4  -4  15    2.80    4.40 
  -4   4  15   -1.60    3.30 
  -3  -4  15  440.36   17.30 
   3  -4 -15  425.76   19.30 
  -3   4  15  432.06   16.60 
   2  -4 -15   39.90    6.80 
  -2  -4  15   29.00    5.10 
  -2   4  15   34.80    5.20 
  -1  -4  15  100.39    6.90 
   1  -4 -15  111.89    9.10 
   1   4 -15  101.49    5.40 
  -1   4  15  114.39    7.30 
   0  -4  15  301.17   12.10 
   0  -4 -15  298.87   14.00 
   0   4  15  308.37   10.70 
   0   4  15  317.57   12.60 
   1  -4  15  552.34   19.40 
   1   4  15  588.04   18.20 
   1   4  15  581.44   20.30 
   2  -4  15  164.28    8.50 
   2   4  15  175.38   10.20 
   3   4  15  370.26   16.20 
   4  -4  15    5.00    6.70 
   4   4  15   20.80    6.70 
   5  -4  15  273.87   17.30 
   5   4  15  274.87   15.80 
   5  -5 -15   23.10    8.20 
  -5   5  15   20.00    5.30 
  -4  -5  15   90.69    8.20 
   4  -5 -15  100.29   11.30 
  -4   5  15   94.99    7.40 
  -3  -5  15    3.50    4.00 
   3  -5 -15    7.10    6.00 
  -3   5  15    5.90    3.60 
   2  -5 -15  719.93   27.50 
  -2  -5  15  750.02   25.10 
  -2   5  15  725.13   24.50 
  -1  -5  15   36.60    5.10 
   1  -5 -15   39.60    6.50 
   1   5 -15   33.00    4.30 
  -1   5  15   33.40    5.40 
   0  -5  15  259.07   10.80 
   0  -5 -15  258.77   13.00 
   0   5  15  265.97   10.20 
   0   5  15  239.28   11.20 
   1  -5  15   19.80    4.00 
   1   5  15   23.20    4.20 
   1   5  15   10.40    4.80 
   2   5  15 1466.45   45.70 
   3  -5  15   33.00    7.70 
   3   5  15   43.00    7.40 
   4  -5  15  202.78   15.50 
   4   5  15  215.98   13.00 
   5  -6 -15  258.27   16.90 
   4  -6 -15    4.90    6.30 
  -4   6  15    0.30    3.90 
  -3  -6  15  153.78    9.50 
   3  -6 -15  158.38   12.00 
  -3   6  15  142.89    8.80 
  -2  -6  15    4.30    3.90 
   2  -6 -15    2.60    4.80 
  -2   6  15    6.30    4.10 
   2   6 -15   -2.80    3.50 
   1  -6 -15  616.74   23.60 
  -1  -6  15  601.84   21.00 
   1   6 -15  585.74   20.60 
  -1   6  15  637.84   21.30 
   0  -6  15   22.20    4.30 
   0  -6 -15   24.10    5.70 
   0   6  15   19.40    5.10 
   0   6  15   17.10    4.30 
  -1  -6 -15  485.95   19.10 
   1   6  15  498.95   17.50 
   1   6  15  507.65   19.30 
   2   6  15   51.49    7.80 
   3  -6  15  221.18   14.70 
   3   6  15  204.68   12.40 
   4  -7 -15  135.79   12.70 
   3  -7 -15   -1.90    6.20 
   2  -7 -15  248.98   14.80 
   2   7 -15  280.97   12.80 
  -2   7  15  281.07   12.40 
   1  -7 -15   24.60    6.40 
   1   7 -15   28.30    5.30 
  -1   7  15   26.50    5.40 
   0  -7 -15  214.88   12.50 
   0   7  15  200.48   11.00 
   0   7  15  191.88   10.10 
   1   7  15   15.20    5.40 
   1   7  15   13.40    4.90 
   2  -7  15  197.48   13.70 
   2   7  15  164.28   16.80 
   2   7  15  197.78   11.60 
   3  -7  15    3.90    7.50 
   3   7  15    9.20    6.90 
   3  -8 -15   99.09   11.90 
   3   8 -15   96.69   10.20 
   2  -8 -15   18.20    7.20 
   2   8 -15   12.20    5.50 
   1  -8 -15  219.18   13.70 
  -1   8  15  202.68   10.70 
   1   8 -15  203.88   11.40 
   0   8  15    5.50    5.00 
   0   8  15    1.10    5.10 
   1  -8  15  227.48   14.80 
   1   8  15  244.28   12.40 
   1   8  15  239.48   15.20 
  -6   0  16  267.77   14.40 
   6   0 -16  278.17   15.00 
  -5   0  16    4.00    4.70 
   5   0 -16    1.60    4.50 
   4   0 -16  803.82   28.90 
  -4   0  16  813.72   27.70 
  -3   0  16   14.30    4.50 
   2   0 -16  562.54   21.30 
  -2   0  16  555.24   19.90 
  -1   0  16   10.00    3.50 
   0   0  16  987.70   30.70 
   1   0  16    4.70    3.50 
   2   0  16  361.36   14.00 
   3   0  16    9.70    4.50 
   4   0  16  648.24   23.20 
   5   0  16   -2.30    4.50 
   5   0  16   -2.20    5.40 
   6  -1 -16   16.80    6.50 
  -6  -1  16   27.60    6.90 
  -6   1  16   22.40    6.10 
   6   1 -16   19.30    6.30 
   5  -1 -16  638.04   25.30 
  -5  -1  16  624.24   24.00 
   5   1 -16  647.64   24.50 
  -5   1  16  656.73   23.70 
   4  -1 -16   49.00    7.30 
  -4  -1  16   38.80    6.30 
   4   1 -16   38.00    6.50 
  -4   1  16   39.50    6.20 
  -3  -1  16 1182.78   36.30 
   3  -1 -16 1110.89   37.80 
  -3   1  16 1150.28   36.30 
   3   1 -16 1149.98   38.10 
   2  -1 -16   -9.10    2.60 
  -2  -1  16   -0.80    3.30 
  -2   1  16   -0.80    3.40 
  -1  -1  16 1748.13   53.29 
   1  -1 -16 1821.32   55.19 
  -1   1  16 1852.51   53.29 
   0  -1  16   15.20    3.70 
   0   1  16   26.40    4.10 
   1  -1  16  366.76   13.70 
   1   1  16  349.87   13.70 
   2  -1  16   25.40    4.50 
   2   1  16   23.60    4.80 
   3  -1  16  801.72   26.40 
   3   1  16  812.52   27.20 
   4  -1  16    2.20    4.20 
   4   1  16    2.40    5.60 
   5  -1  16  184.78   10.90 
   5  -1  16  172.78   12.10 
   5   1  16  171.28   11.80 
  -6  -2  16  174.98   12.20 
   6  -2 -16  196.38   13.80 
   6   2 -16  186.68   12.30 
  -6   2  16  204.78   11.80 
  -5  -2  16    2.40    4.90 
   5  -2 -16   -4.20    4.90 
   5   2 -16   -1.60    4.30 
  -5   2  16    9.50    4.50 
  -4  -2  16  881.31   30.10 
   4  -2 -16  854.91   31.60 
  -4   2  16  901.61   29.30 
  -3  -2  16   75.09    7.50 
   3  -2 -16   54.29    7.40 
  -3   2  16   60.69    6.90 
  -2  -2  16  687.83   23.00 
   2  -2 -16  715.83   25.20 
  -2   2  16  612.74   22.70 
   1  -2 -16    5.40    3.90 
  -1  -2  16   12.10    3.90 
  -1   2  16   10.90    3.80 
   0  -2  16 1013.80   32.70 
   0   2  16 1106.79   33.00 
   1  -2  16    2.10    3.00 
   1   2  16   -7.90    2.90 
   2  -2  16  760.22   24.60 
   2   2  16  761.42   25.50 
   3  -2  16   24.10    4.80 
   3   2  16   21.90    5.70 
   4  -2  16  263.97   11.80 
   4   2  16  251.67   13.20 
   5  -2  16    5.90    6.10 
   5   2  16   11.80    6.20 
   6  -3 -16   51.09    9.50 
  -6   3  16   52.99    7.70 
   5  -3 -16  256.07   15.80 
  -5  -3  16  254.77   13.90 
  -5   3  16  278.77   12.90 
  -4  -3  16   58.99    7.70 
   4  -3 -16   42.60    8.00 
  -4   3  16   53.09    6.90 
  -3  -3  16  478.65   18.20 
   3  -3 -16  473.45   20.50 
  -3   3  16  466.55   17.90 
  -2  -3  16   31.20    5.20 
   2  -3 -16   36.00    6.50 
  -2   3  16   35.00    5.40 
  -1  -3  16   10.00    4.00 
   1  -3 -16    9.20    4.40 
  -1   3  16    8.30    3.70 
   0  -3 -16   61.39    7.30 
   0  -3  16   57.79    5.30 
   0   3  16   66.19    5.80 
   1  -3  16  485.95   17.50 
   1   3  16  506.95   18.20 
   2  -3  16    7.90    3.60 
   2   3  16    2.50    4.50 
   3  -3  16  158.78    8.40 
   3   3  16  143.09   10.40 
   4  -3  16    8.60    6.50 
   4   3  16   12.20    6.00 
   5  -3  16  277.67   17.50 
   5   3  16  270.27   14.80 
   6  -4 -16  233.08   16.20 
  -6   4  16  241.58   13.10 
  -5  -4  16    2.00    5.00 
   5  -4 -16    1.90    6.10 
  -5   4  16    1.00    4.50 
  -4  -4  16  145.49    9.80 
   4  -4 -16  148.79   11.90 
  -4   4  16  146.49    8.80 
   3  -4 -16    7.60    5.50 
  -3  -4  16   16.50    4.90 
  -3   4  16   13.20    4.70 
  -2  -4  16  576.74   20.50 
   2  -4 -16  550.74   22.40 
  -2   4  16  576.04   20.30 
  -1  -4  16  112.29    7.40 
   1  -4 -16  112.49    8.70 
  -1   4  16   83.79    6.70 
   1   4 -16  104.99    5.30 
   0  -4  16  581.14   20.00 
   0  -4 -16  577.74   22.00 
   0   4  16  562.24   18.60 
   0   4  16  582.64   20.40 
   1  -4  16  145.29    8.10 
   1   4  16  143.99    8.90 
   2  -4  16  163.18    8.60 
   2   4  16  164.28   10.10 
   3   4  16   -4.30    4.90 
   4  -4  16  212.38   15.50 
   4   4  16  200.58   12.40 
   5  -5 -16  124.89   13.50 
  -5   5  16  122.89    8.80 
   4  -5 -16   29.10    8.10 
  -4  -5  16   30.10    6.70 
  -4   5  16   33.00    5.90 
  -3  -5  16  256.77   12.60 
   3  -5 -16  262.57   14.80 
  -3   5  16  240.98   12.00 
  -2  -5  16    8.10    4.40 
   2  -5 -16    2.60    4.70 
   2   5 -16    4.90    3.70 
  -2   5  16   17.20    4.70 
  -1  -5  16  802.62   26.30 
   1  -5 -16  839.02   29.10 
  -1   5  16  816.52   26.50 
   1   5 -16  728.23   24.60 
   0  -5 -16    8.30    4.50 
   0  -5  16    1.60    3.30 
   0   5  16   -1.90    4.40 
   0   5  16    2.80    3.60 
   1  -5  16  740.43   24.40 
   1   5  16  760.62   25.70 
   2   5  16   32.10    6.50 
   3   5  16  580.14   22.80 
   4  -5  16    4.80    6.90 
   4   5  16    6.00    6.40 
   5  -6 -16   13.60    7.90 
   4  -6 -16  136.79   12.70 
  -4   6  16  165.68    9.60 
  -3  -6  16   -0.60    4.40 
   3  -6 -16    9.30    6.50 
  -3   6  16    6.30    4.40 
  -2  -6  16  507.65   19.40 
   2  -6 -16  519.25   21.90 
   2   6 -16  506.95   18.50 
  -2   6  16  520.25   19.20 
   1  -6 -16   10.10    5.40 
  -1  -6  16    5.30    3.90 
   1   6 -16    6.60    3.40 
  -1   6  16    7.70    4.10 
   0  -6 -16  320.57   15.20 
   0   6  16  297.87   13.70 
   1   6  16   85.99    7.80 
   2   6  16  698.93   25.30 
   3  -6  16    6.20    7.60 
   3   6  16    5.40    5.90 
   4  -7 -16    1.50    7.20 
   3  -7 -16  162.48   13.50 
   2  -7 -16   14.60    6.20 
  -2  -7  16   21.90    5.20 
   2   7 -16   25.80    6.70 
  -2   7  16   15.40    5.10 
   1  -7 -16  204.08   13.00 
  -1   7  16  204.88   10.90 
   0  -7 -16    8.80    5.20 
   0   7  16    7.20    5.40 
   1   7  16  445.46   18.40 
   2  -7  16   28.70    8.70 
   2   7  16   15.00    6.30 
   2  -8 -16  116.89   11.50 
   1  -8 -16   25.40    6.90 
  -1   8  16   31.70    6.00 
   0   8  16  261.87   13.30 
   1  -8  16    7.20    7.50 
   1   8  16    3.20    5.80 
  -6   0  17    2.70    4.80 
   6   0 -17    0.80    5.60 
  -5   0  17  871.71   30.60 
   5   0 -17  894.61   31.80 
   4   0 -17   14.00    5.60 
  -4   0  17    5.70    4.30 
  -3   0  17  820.82   27.50 
   3   0 -17  822.62   29.20 
   2   0 -17   15.90    4.90 
  -2   0  17    1.80    3.70 
  -1   0  17 1970.00   57.99 
   0   0  17   10.20    3.60 
   1   0  17  552.54   19.20 
   2   0  17    2.50    3.80 
   3   0  17  744.83   25.40 
   4   0  17    0.90    4.60 
   5   0  17  161.78   11.10 
  -6  -1  17  277.97   14.80 
   6  -1 -17  273.47   15.60 
  -6   1  17  268.87   14.20 
   6   1 -17  249.38   14.30 
   5  -1 -17    1.00    4.90 
  -5  -1  17    4.60    4.80 
   5   1 -17    5.50    5.00 
  -5   1  17    3.40    4.50 
  -4  -1  17  905.31   30.40 
   4  -1 -17  887.01   31.80 
   4   1 -17  880.11   31.40 
  -4   1  17  888.21   29.80 
   3  -1 -17   50.89    7.50 
  -3  -1  17   62.49    7.00 
  -3   1  17   59.29    6.90 
   3   1 -17   59.09    7.70 
  -2  -1  17  658.03   22.70 
   2  -1 -17  668.13   24.30 
  -2   1  17  611.64   22.40 
  -1  -1  17   81.79    6.60 
  -1   1  17   93.39    6.70 
   0  -1  17  711.03   23.90 
   0   1  17  740.53   24.00 
   1  -1  17    5.80    3.20 
   1   1  17   -1.00    3.40 
   2  -1  17  606.24   20.90 
   2   1  17  597.84   21.10 
   3  -1  17   17.80    5.20 
   3   1  17   15.70    5.30 
   4  -1  17  459.85   18.30 
   4   1  17  505.75   19.80 
   5  -1  17   13.40    6.60 
   5  -1  17    3.00    5.50 
   5   1  17   15.00    6.80 
  -6  -2  17   14.00    6.30 
   6  -2 -17   14.80    7.00 
  -6   2  17   11.70    5.60 
   6   2 -17   13.80    5.80 
  -5  -2  17  175.28   11.20 
   5  -2 -17  159.88   12.40 
  -5   2  17  179.48   10.80 
   5   2 -17  180.28   11.40 
   4  -2 -17   13.20    5.70 
  -4  -2  17   22.60    5.60 
  -4   2  17   29.20    5.50 
  -3  -2  17  715.53   24.70 
   3  -2 -17  731.63   26.80 
  -3   2  17  690.33   24.50 
   2  -2 -17  454.95   18.30 
  -2  -2  17  384.16   15.40 
  -2   2  17  357.76   15.50 
   1  -2 -17  185.88   11.20 
  -1  -2  17  164.48    9.20 
  -1   2  17  195.38    9.50 
   0  -2  17   10.30    4.00 
   0   2  17   12.80    3.90 
   1  -2  17  373.16   14.30 
   1   2  17  362.26   14.50 
   2  -2  17   78.79    6.10 
   2   2  17   77.89    7.00 
   3  -2  17  343.97   13.70 
   3   2  17  326.07   14.90 
   4  -2  17   48.10    6.50 
   4   2  17   48.70    7.80 
   6  -3 -17  172.58   13.90 
  -6  -3  17  169.08   12.30 
  -6   3  17  196.18   11.50 
   5  -3 -17    6.60    6.30 
  -5  -3  17    8.70    5.20 
  -5   3  17   11.30    4.70 
   4  -3 -17  232.78   14.40 
  -4  -3  17  235.98   12.60 
  -4   3  17  261.87   12.30 
  -3  -3  17   14.20    4.90 
   3  -3 -17   10.10    5.30 
  -3   3  17   13.90    4.70 
  -2  -3  17  501.15   18.40 
   2  -3 -17  513.95   20.50 
  -2   3  17  465.05   18.30 
   1  -3 -17  184.08   10.90 
  -1  -3  17  177.58    9.20 
  -1   3  17  174.88    9.20 
   0  -3  17  311.37   13.10 
   0   3  17  330.57   13.30 
   1  -3  17   43.70    5.40 
   1   3  17   35.50    5.70 
   2  -3  17  432.06   16.00 
   2   3  17  415.46   17.00 
   3  -3  17   -5.70    3.30 
   3   3  17    1.90    5.70 
   4   3  17  255.47   13.70 
  -5  -4  17  318.77   16.50 
   5  -4 -17  334.77   18.80 
  -5   4  17  367.36   15.60 
   4  -4 -17   -3.80    5.00 
  -4  -4  17   -2.80    3.90 
  -4   4  17    1.50    4.40 
   3  -4 -17  247.38   14.20 
  -3  -4  17  237.38   12.10 
  -3   4  17  239.18   12.10 
  -2  -4  17   42.10    6.10 
   2  -4 -17   47.70    7.40 
  -2   4  17   63.09    7.40 
   1  -4 -17  659.33   24.90 
  -1  -4  17  685.63   22.80 
  -1   4  17  642.64   22.70 
   0  -4  17    1.50    3.60 
   0  -4 -17   -2.10    3.90 
   0   4  17   -3.80    4.00 
   1  -4  17  593.74   21.20 
   1   4  17  634.54   22.10 
   2  -4  17  109.99    7.40 
   2   4  17  131.69    9.90 
   3   4  17  327.67   15.40 
   4  -4  17    4.10    6.80 
   4   4  17    9.70    6.40 
   5  -5 -17    4.70    7.00 
  -5   5  17    4.10    4.10 
  -4  -5  17  193.28   12.50 
   4  -5 -17  222.38   14.80 
  -4   5  17  222.58   11.50 
  -3  -5  17    3.90    4.80 
   3  -5 -17    7.20    5.60 
  -3   5  17    5.70    4.40 
  -2  -5  17  448.16   17.40 
   2  -5 -17  401.96   18.90 
  -2   5  17  444.86   17.30 
  -1  -5  17    1.30    3.20 
   1  -5 -17    3.30    4.90 
  -1   5  17    4.30    4.20 
   0  -5 -17  384.76   17.40 
   0  -5  17  412.56   15.40 
   0   5  17  385.26   15.70 
   1  -5  17   37.60    6.10 
   1   5  17   48.50    7.10 
   2   5  17  212.98   12.10 
   3   5  17   15.20    6.40 
   4  -6 -17    3.70    6.10 
  -4   6  17   -2.50    4.20 
   3  -6 -17  252.17   15.40 
  -3  -6  17  264.87   13.50 
  -3   6  17  251.27   12.50 
   2  -6 -17    6.90    5.60 
  -2  -6  17   15.60    4.60 
  -2   6  17    6.40    4.70 
   1  -6 -17  528.55   21.90 
  -1  -6  17  505.25   19.10 
  -1   6  17  526.55   19.30 
   0  -6 -17    9.30    4.80 
   0   6  17   10.30    5.50 
   1   6  17  553.54   21.00 
   2   6  17   74.79    8.80 
   3  -6  17  183.18   14.30 
   3   6  17  177.88   12.50 
   3  -7 -17   -1.50    5.60 
  -2  -7  17  246.48   12.60 
   2  -7 -17  273.37   15.80 
  -2   7  17  250.47   12.60 
   1  -7 -17   39.20    7.40 
  -1   7  17   23.30    5.50 
   0  -7 -17  323.67   17.60 
   0   7  17  294.57   13.90 
   1   7  17   48.10    7.20 
   2  -7  17  335.37   19.10 
   2   7  17  336.67   16.50 
   1  -8 -17  185.68   12.90 
  -1   8  17  183.48   11.00 
   0   8  17   -1.70    5.60 
   6   0 -18  294.47   16.60 
  -6   0  18  286.47   15.10 
  -5   0  18    7.90    4.90 
   5   0 -18    4.80    5.00 
   4   0 -18 1015.90   35.60 
  -4   0  18 1045.80   34.10 
   3   0 -18    0.30    4.30 
  -3   0  18   16.20    5.00 
  -2   0  18 1058.49   34.10 
  -1   0  18   21.70    4.80 
   0   0  18  883.41   28.50 
   1   0  18    6.00    3.60 
   2   0  18  906.31   29.70 
   3   0  18   10.20    4.80 
   4   0  18  434.66   17.80 
  -6  -1  18    1.50    5.00 
   6  -1 -18   11.60    6.30 
  -6   1  18   -1.30    4.80 
   6   1 -18    6.40    6.00 
  -5  -1  18  340.47   15.90 
   5  -1 -18  348.07   17.40 
   5   1 -18  338.97   16.60 
  -5   1  18  334.77   15.50 
  -4  -1  18   17.40    5.20 
   4  -1 -18   14.80    5.50 
  -4   1  18   19.50    5.20 
   4   1 -18    8.60    5.00 
   3  -1 -18  497.95   20.80 
  -3  -1  18  507.25   18.90 
  -3   1  18  473.35   18.80 
  -2  -1  18  562.94   20.60 
   2  -1 -18  595.74   22.50 
  -2   1  18  539.75   20.50 
  -1  -1  18  331.97   14.10 
  -1   1  18  351.16   14.20 
   0  -1  18   54.89    6.30 
   0   1  18   51.99    5.90 
   1  -1  18  290.17   12.20 
   1   1  18  285.07   12.40 
   2  -1  18  106.79    7.40 
   2   1  18  104.89    7.80 
   3  -1  18  605.94   22.20 
   3   1  18  636.34   23.00 
   4  -1  18   25.30    5.80 
   4   1  18   35.30    7.40 
  -6  -2  18  153.38   11.80 
   6  -2 -18  179.78   14.20 
   6   2 -18  188.78   12.70 
  -6   2  18  185.98   11.60 
   5  -2 -18    8.00    6.30 
  -5  -2  18   15.50    5.80 
  -5   2  18   19.90    5.80 
   4  -2 -18  410.16   19.20 
  -4  -2  18  418.96   17.60 
  -4   2  18  418.56   16.90 
  -3  -2  18    5.60    4.30 
   3  -2 -18    3.10    4.70 
  -3   2  18    8.90    4.80 
   2  -2 -18  109.49    9.00 
  -2  -2  18  102.79    7.40 
  -2   2  18  100.49    7.70 
  -1  -2  18  123.19    8.00 
   1  -2 -18  118.09    9.10 
  -1   2  18  125.39    7.90 
   0  -2  18  846.82   28.30 
   0   2  18  895.41   28.50 
   1  -2  18   -2.30    3.50 
   1   2  18    0.30    4.10 
   2  -2  18  227.98   10.80 
   2   2  18  223.88   11.50 
   3  -2  18    2.90    4.40 
   3   2  18   -5.30    4.70 
   4  -2  18  379.56   16.00 
   4   2  18  377.66   17.00 
   5  -3 -18  265.47   16.40 
  -5  -3  18  259.27   14.40 
  -5   3  18  293.87   13.90 
   4  -3 -18   15.70    6.40 
  -4  -3  18   19.30    5.60 
  -4   3  18   10.40    4.60 
  -3  -3  18  553.24   20.20 
   3  -3 -18  524.25   21.90 
  -3   3  18  478.75   19.40 
  -2  -3  18   23.60    5.00 
   2  -3 -18   23.40    6.00 
  -2   3  18   19.80    5.40 
   1  -3 -18  566.44   22.90 
  -1  -3  18  603.44   21.30 
  -1   3  18  627.44   21.60 
   0  -3  18   15.70    4.40 
   0   3  18    8.60    4.40 
   1  -3  18  764.02   25.90 
   1   3  18  789.52   26.40 
   2  -3  18   30.40    5.30 
   2   3  18   33.90    6.30 
   3  -3  18  410.06   15.80 
   3   3  18  391.26   17.30 
   4   3  18   -4.40    6.00 
   5  -4 -18    6.80    6.30 
  -5  -4  18    3.60    5.20 
  -5   4  18    6.00    4.80 
  -4  -4  18  153.58   10.60 
   4  -4 -18  175.58   13.70 
  -4   4  18  163.58    9.80 
   3  -4 -18   -0.80    4.60 
  -3  -4  18    1.00    4.00 
  -3   4  18    9.50    4.90 
   2  -4 -18  797.22   29.00 
  -2  -4  18  782.32   26.50 
  -2   4  18  720.33   26.10 
  -1  -4  18   43.30    6.00 
   1  -4 -18   30.20    6.40 
  -1   4  18   31.30    5.60 
   0  -4 -18  260.77   13.70 
   0  -4  18  272.07   12.00 
   0   4  18  261.67   12.30 
   1  -4  18    2.50    3.80 
   1   4  18    3.00    4.80 
   2  -4  18  383.96   16.10 
   2   4  18  428.46   17.40 
   3   4  18   -8.50    5.90 
   4  -4  18  163.58   13.60 
   4   4  18  164.98   11.80 
   5  -5 -18  191.98   15.00 
  -5   5  18  208.38   11.60 
   4  -5 -18    4.50    6.20 
  -4  -5  18   -9.20    4.60 
  -4   5  18   -0.30    4.50 
  -3  -5  18  264.67   13.40 
   3  -5 -18  311.27   16.90 
  -3   5  18  257.97   13.20 
  -2  -5  18   17.50    5.30 
   2  -5 -18   20.30    6.20 
  -2   5  18   11.40    4.80 
   1  -5 -18  341.67   16.80 
  -1  -5  18  346.47   14.50 
  -1   5  18  349.07   14.60 
   0  -5  18   18.70    4.80 
   0  -5 -18   15.70    5.60 
   0   5  18   20.70    5.40 
   1   5  18  339.27   15.10 
   2   5  18    4.90    5.60 
   3   5  18  110.69    9.80 
  -4  -6  18  145.79   10.70 
   4  -6 -18  161.18   14.40 
  -4   6  18  163.48   10.20 
   3  -6 -18    2.40    5.60 
  -3  -6  18    7.80    5.20 
  -3   6  18    5.80    4.80 
   2  -6 -18  362.76   17.70 
  -2  -6  18  330.27   15.00 
  -2   6  18  356.46   15.50 
  -1  -6  18    3.80    4.20 
   1  -6 -18    8.80    5.10 
  -1   6  18    6.20    4.70 
   0  -6 -18  272.47   14.50 
   0   6  18  266.47   13.00 
   1   6  18   51.29    7.60 
   2   6  18  266.57   13.90 
   3  -7 -18  181.08   13.80 
   2  -7 -18    2.00    5.30 
  -2   7  18    2.10    4.90 
   1  -7 -18  414.16   19.20 
  -1   7  18  384.36   16.40 
   0   7  18   -0.80    4.90 
   1   7  18  304.47   15.30 
   6   0 -19    0.80    5.00 
  -6   0  19    8.60    5.50 
  -5   0  19  255.67   13.40 
   5   0 -19  251.37   15.00 
  -4   0  19    6.30    5.00 
   4   0 -19   -3.60    4.30 
  -3   0  19   17.50    5.20 
   3   0 -19   15.60    5.70 
  -2   0  19    4.70    4.20 
  -1   0  19  687.23   24.10 
   0   0  19    7.90    3.80 
   1   0  19   66.59    6.30 
   2   0  19    4.00    4.30 
   3   0  19  658.33   23.60 
   4   0  19   10.50    6.00 
   6  -1 -19  211.48   14.60 
  -6  -1  19  214.78   13.10 
  -6   1  19  211.18   13.20 
   6   1 -19  193.68   13.00 
   5  -1 -19   53.69    8.60 
  -5  -1  19   56.79    8.10 
   5   1 -19   39.30    7.20 
  -5   1  19   56.59    8.20 
  -4  -1  19  616.74   22.70 
   4  -1 -19  606.44   24.30 
   4   1 -19  584.84   24.00 
  -4   1  19  584.44   22.20 
   3  -1 -19   16.40    5.30 
  -3  -1  19    9.00    4.50 
  -3   1  19    9.50    4.80 
  -2  -1  19  265.87   12.50 
   2  -1 -19  277.47   14.20 
  -2   1  19  236.58   12.30 
  -1  -1  19  278.37   12.90 
  -1   1  19  300.87   13.40 
   0  -1  19  529.15   19.40 
   0   1  19  542.15   19.50 
   1  -1  19   14.30    4.40 
   1   1  19   10.40    5.10 
   2  -1  19  520.35   19.30 
   2   1  19  516.65   19.50 
   3  -1  19    5.40    4.60 
   3   1  19   10.30    5.50 
   4  -1  19  327.37   15.30 
   4   1  19  334.07   16.10 
   5  -2 -19  281.87   16.70 
  -5  -2  19  271.37   14.40 
  -5   2  19  266.37   13.50 
   4  -2 -19   47.70    8.30 
  -4  -2  19   53.49    7.60 
  -4   2  19   50.79    7.20 
  -3  -2  19  717.53   25.10 
   3  -2 -19  730.43   27.30 
  -3   2  19  679.33   25.20 
  -2  -2  19    5.30    4.30 
   2  -2 -19    5.80    4.60 
  -2   2  19    7.20    4.70 
  -1  -2  19  516.65   19.90 
  -1   2  19  572.84   20.20 
   0  -2  19   60.39    7.20 
   0   2  19   71.99    6.70 
   1  -2  19  807.32   26.80 
   1   2  19  809.52   27.20 
   2  -2  19   -1.10    4.00 
   2   2  19    2.30    4.70 
   3  -2  19  613.24   22.10 
   3   2  19  642.44   23.90 
   4  -2  19   -3.60    4.70 
   4   2  19   -0.70    5.60 
   5  -3 -19    2.10    5.90 
  -5  -3  19    3.30    5.50 
  -5   3  19   -5.10    4.50 
   4  -3 -19  298.27   16.50 
  -4  -3  19  297.97   14.60 
  -4   3  19  294.27   13.80 
  -3  -3  19    7.30    4.90 
   3  -3 -19    2.60    4.80 
  -3   3  19   13.20    4.70 
  -2  -3  19  550.34   19.80 
   2  -3 -19  532.75   21.80 
  -2   3  19  477.55   19.60 
   1  -3 -19   13.70    5.70 
  -1  -3  19   15.20    4.50 
  -1   3  19   12.50    4.70 
   0  -3  19  414.46   16.90 
   0   3  19  442.36   16.90 
   1  -3  19   26.70    5.50 
   1   3  19   39.20    6.60 
   2  -3  19  373.16   15.20 
   2   3  19  357.66   15.90 
   3  -3  19   14.90    5.20 
   3   3  19   19.50    6.40 
   4   3  19  236.18   14.30 
   5  -4 -19  168.48   13.90 
  -5  -4  19  168.28   11.80 
  -5   4  19  168.18   10.40 
   4  -4 -19   10.70    7.00 
  -4  -4  19    4.90    4.90 
  -4   4  19    9.90    5.20 
  -3  -4  19  475.15   19.30 
   3  -4 -19  500.25   21.90 
  -3   4  19  438.76   18.80 
  -2  -4  19   -1.30    3.50 
   2  -4 -19   18.70    6.00 
  -2   4  19    3.90    4.70 
   1  -4 -19  418.56   18.70 
  -1  -4  19  439.86   16.80 
  -1   4  19  406.76   16.70 
   0  -4  19   11.40    4.30 
   0   4  19    8.40    4.80 
   1  -4  19  535.45   20.70 
   1   4  19  624.74   22.30 
   2   4  19   -0.70    5.00 
   3   4  19  101.89    9.40 
  -4  -5  19  117.49    9.60 
   4  -5 -19  125.59   12.10 
  -4   5  19  125.39    8.90 
  -3  -5  19    8.60    4.90 
   3  -5 -19    1.30    5.90 
  -3   5  19    1.10    4.80 
   2  -5 -19  499.85   21.90 
  -2  -5  19  500.65   19.20 
  -2   5  19  458.95   19.20 
   1  -5 -19   37.10    7.20 
  -1  -5  19   37.60    6.20 
  -1   5  19   32.40    5.90 
   0  -5  19  287.67   12.80 
   0  -5 -19  262.37   14.70 
   0   5  19  283.57   13.70 
   1   5  19   12.40    5.80 
   2   5  19  237.08   13.10 
   3   5  19   -6.70    5.80 
   3  -6 -19  192.18   13.70 
  -3  -6  19  200.78   12.00 
  -3   6  19  172.28   11.10 
  -2  -6  19   43.70    7.00 
   2  -6 -19   38.70    7.60 
  -2   6  19   32.80    6.40 
   1  -6 -19  336.87   16.90 
  -1  -6  19  341.97   14.90 
  -1   6  19  347.07   15.50 
   0  -6 -19   -3.50    4.30 
   0   6  19    2.30    5.00 
   1   6  19   94.09    8.90 
   2   6  19    6.90    6.20 
   2  -7 -19  145.99   11.80 
  -2   7  19  137.49   10.30 
   1  -7 -19    6.80    5.30 
  -1   7  19    2.20    4.50 
   0   7  19  138.89   10.40 
   5   0 -20   -4.00    4.60 
  -5   0  20   -2.00    4.40 
   4   0 -20  448.46   20.70 
  -4   0  20  452.55   18.60 
  -3   0  20   -3.10    4.10 
   3   0 -20   -5.10    4.40 
  -2   0  20   58.29    7.40 
  -1   0  20   12.50    4.80 
   0   0  20  572.54   21.00 
   1   0  20  -10.00    4.00 
   2   0  20  363.36   15.70 
   3   0  20   13.20    6.00 
   4   0  20  292.97   15.00 
   5  -1 -20  198.28   14.00 
  -5  -1  20  192.08   12.00 
  -5   1  20  200.58   11.80 
   5   1 -20  194.68   12.80 
  -4  -1  20   24.80    5.80 
   4  -1 -20   18.70    6.20 
  -4   1  20   25.90    5.80 
  -3  -1  20  249.97   12.50 
   3  -1 -20  250.57   14.10 
  -3   1  20  243.48   13.00 
   2  -1 -20   71.89    9.00 
  -2  -1  20   83.39    7.30 
  -2   1  20   63.89    7.80 
  -1  -1  20  488.15   19.40 
  -1   1  20  510.15   19.30 
   0  -1  20  104.09    7.80 
   0   1  20  110.29    7.90 
   1  -1  20  451.25   17.20 
   1   1  20  432.36   17.30 
   2  -1  20    1.30    4.00 
   2   1  20    1.60    5.20 
   3  -1  20  532.45   20.40 
   3   1  20  523.85   20.70 
   4  -1  20   26.10    7.10 
   4   1  20   38.10    7.30 
   5  -2 -20   24.10    7.20 
  -5  -2  20   34.20    7.60 
  -5   2  20   22.90    6.00 
  -4  -2  20  248.98   13.40 
   4  -2 -20  246.68   15.30 
  -4   2  20  254.57   12.90 
  -3  -2  20    6.30    4.30 
   3  -2 -20    3.90    4.70 
  -3   2  20   -1.50    4.20 
  -2  -2  20 1247.28   38.80 
   2  -2 -20 1289.07   41.30 
  -2   2  20 1101.99   38.60 
  -1  -2  20   36.60    6.10 
  -1   2  20   43.10    6.50 
   0  -2  20  539.25   20.40 
   0   2  20  562.54   20.40 
   1  -2  20   12.70    4.60 
   1   2  20    9.40    5.00 
   2  -2  20  533.45   19.70 
   2   2  20  524.25   20.40 
   3  -2  20    1.60    4.70 
   3   2  20   15.00    6.10 
  -5  -3  20  212.38   13.30 
   5  -3 -20  240.78   15.50 
  -5   3  20  240.38   12.70 
  -4  -3  20    7.80    5.10 
   4  -3 -20    8.50    5.90 
  -4   3  20   13.60    5.70 
  -3  -3  20  603.64   21.80 
   3  -3 -20  587.94   23.80 
  -3   3  20  497.35   21.00 
  -2  -3  20   17.70    5.00 
   2  -3 -20   15.10    5.60 
  -2   3  20   12.00    5.10 
  -1  -3  20  317.97   14.00 
   1  -3 -20  323.27   16.00 
  -1   3  20  318.57   14.30 
   0  -3  20   42.60    6.60 
   0   3  20   69.89    7.60 
   1  -3  20  470.05   18.50 
   1   3  20  501.25   19.10 
   2  -3  20   22.80    5.60 
   2   3  20   38.40    7.60 
   3   3  20  283.97   14.60 
  -4  -4  20  263.57   14.00 
   4  -4 -20  263.77   16.60 
  -4   4  20  255.47   13.50 
   3  -4 -20   38.10    8.10 
  -3  -4  20   29.80    6.30 
  -3   4  20   26.20    6.80 
  -2  -4  20  425.96   17.10 
   2  -4 -20  414.46   19.30 
  -2   4  20  351.96   16.40 
   1  -4 -20    5.60    4.90 
  -1  -4  20    0.60    4.30 
  -1   4  20    3.00    4.40 
   0  -4  20  505.75   18.70 
   0   4  20  462.05   18.70 
   1  -4  20   25.30    5.70 
   1   4  20   27.20    6.30 
   2   4  20  294.37   15.30 
   3   4  20   -8.30    5.30 
  -4  -5  20    4.10    5.00 
   4  -5 -20    1.90    6.00 
  -4   5  20    0.90    5.10 
   3  -5 -20  255.37   15.80 
  -3  -5  20  232.78   12.80 
  -3   5  20  221.48   12.30 
  -2  -5  20   48.50    6.90 
   2  -5 -20   55.39    8.90 
  -2   5  20   38.50    6.70 
   1  -5 -20  361.26   17.90 
  -1  -5  20  365.96   15.40 
  -1   5  20  370.06   15.90 
   0  -5  20   -4.80    3.30 
   0   5  20    0.50    5.40 
   1   5  20  271.67   13.70 
   2   5  20   -2.80    5.70 
   3  -6 -20    4.60    5.70 
  -3  -6  20   10.40    5.40 
  -3   6  20    7.00    5.60 
   2  -6 -20  144.89   11.60 
  -2  -6  20  151.18   10.10 
  -2   6  20  143.39   10.40 
   1  -6 -20    2.50    4.80 
  -1  -6  20    8.00    5.00 
  -1   6  20    5.50    5.40 
   0  -6 -20  251.97   14.80 
   0   6  20  269.57   14.00 
   1   6  20   23.50    6.80 
   5   0 -21   36.60    8.10 
  -5   0  21   40.70    7.50 
   4   0 -21    6.10    5.20 
  -4   0  21    9.60    5.00 
  -3   0  21  577.34   22.00 
  -2   0  21   -6.10    4.00 
  -1   0  21  639.54   23.60 
   0   0  21    8.20    4.50 
   1   0  21  573.34   21.20 
   2   0  21   -3.80    4.40 
   3   0  21  380.46   16.70 
   5  -1 -21    0.00    5.20 
  -5  -1  21   -1.00    4.60 
  -5   1  21    7.40    5.10 
   5   1 -21   -1.80    5.30 
   4  -1 -21  281.27   16.60 
  -4  -1  21  320.47   15.00 
  -4   1  21  307.97   15.00 
   3  -1 -21  147.09   11.30 
  -3  -1  21  159.28   10.00 
  -3   1  21  163.68   10.80 
  -2  -1  21   92.29    7.90 
  -2   1  21  106.59   10.20 
  -1  -1  21   -0.60    4.30 
  -1   1  21    1.80    4.30 
   0  -1  21  486.25   19.50 
   0   1  21  543.75   19.80 
   1  -1  21  116.49    8.30 
   1   1  21  113.89    8.60 
   2  -1  21  341.27   14.90 
   2   1  21  357.16   16.00 
   3  -1  21    6.90    5.70 
   3   1  21   15.90    6.10 
  -5  -2  21  292.07   15.30 
   5  -2 -21  294.87   16.90 
  -5   2  21  285.77   14.60 
   4  -2 -21   32.60    7.50 
  -4  -2  21   20.20    6.10 
  -4   2  21   16.60    5.50 
   3  -2 -21  222.88   14.10 
  -3  -2  21  212.28   11.70 
  -3   2  21  202.28   12.30 
   2  -2 -21    6.90    5.00 
  -2  -2  21   16.60    4.90 
  -2   2  21    4.90    4.70 
  -1  -2  21  466.95   18.90 
  -1   2  21  474.65   18.70 
   0  -2  21   81.29    8.60 
   0   2  21   79.29    7.40 
   1  -2  21  393.96   16.40 
   1   2  21  401.76   16.70 
   2  -2  21   49.50    6.70 
   2   2  21   46.40    8.00 
   3  -2  21  376.26   15.90 
   3   2  21  360.26   16.90 
   4  -3 -21  253.67   15.50 
  -4  -3  21  259.57   13.80 
  -4   3  21  259.37   13.40 
   3  -3 -21    8.70    5.70 
  -3  -3  21    9.40    5.50 
  -3   3  21    3.20    5.00 
  -2  -3  21  901.51   29.70 
   2  -3 -21  893.91   32.10 
  -2   3  21  797.92   29.60 
  -1  -3  21   18.90    5.20 
  -1   3  21   19.30    5.70 
   0  -3  21  409.86   17.50 
   0   3  21  474.95   18.20 
   1  -3  21   18.80    5.60 
   1   3  21   28.50    6.20 
   2  -3  21  382.16   16.40 
   2   3  21  385.56   17.10 
   3   3  21   10.10    7.10 
  -4  -4  21    3.90    5.50 
   4  -4 -21   13.00    7.00 
  -4   4  21   -3.10    4.30 
  -3  -4  21  388.56   17.20 
   3  -4 -21  385.76   18.80 
  -3   4  21  326.27   16.10 
   2  -4 -21   31.80    7.30 
  -2  -4  21   29.40    6.00 
  -2   4  21   19.10    6.30 
   1  -4 -21  335.17   17.40 
  -1  -4  21  352.46   15.20 
  -1   4  21  318.97   15.40 
   0  -4  21    1.00    4.30 
   0   4  21    2.10    5.20 
   1  -4  21  282.67   13.50 
   1   4  21  310.37   14.50 
   2   4  21    3.00    5.90 
   3  -5 -21   13.90    7.00 
  -3  -5  21    7.10    5.50 
  -3   5  21    4.80    5.10 
  -2  -5  21  248.28   13.10 
   2  -5 -21  249.08   15.40 
  -2   5  21  237.58   13.40 
  -1  -5  21    2.40    4.60 
   1  -5 -21    5.00    5.40 
  -1   5  21    0.10    4.80 
   0  -5  21  222.48   11.70 
   0   5  21  222.98   12.20 
   1   5  21   16.50    6.20 
  -2  -6  21    6.10    4.90 
   2  -6 -21    1.60    5.30 
  -2   6  21    3.50    5.70 
   1  -6 -21  151.88   11.50 
  -1   6  21  144.99   10.70 
   0   6  21   -9.70    5.30 
   5   0 -22  -12.10    3.90 
  -5   0  22   -0.20    4.90 
  -4   0  22  320.97   15.70 
   4   0 -22  375.26   18.80 
  -3   0  22    4.50    4.80 
  -2   0  22  283.17   13.90 
  -1   0  22   10.60    4.90 
   0   0  22 1144.19   37.10 
   1   0  22    6.10    4.90 
   2   0  22  402.66   17.40 
   3   0  22   -7.60    4.70 
  -5  -1  22  155.58   11.20 
   5  -1 -22  155.88   12.40 
  -5   1  22  158.08   10.90 
  -4  -1  22    5.00    5.00 
   4  -1 -22    7.70    5.90 
  -4   1  22   11.00    5.30 
   3  -1 -22  290.67   16.20 
  -3  -1  22  300.17   14.50 
  -3   1  22  332.47   15.50 
  -2  -1  22   16.20    5.30 
  -2   1  22   20.80    6.00 
  -1  -1  22  563.94   21.90 
  -1   1  22  595.24   22.40 
   0  -1  22    8.80    5.60 
   0   1  22    9.90    4.80 
   1  -1  22  296.47   13.70 
   1   1  22  277.57   13.50 
   2  -1  22   13.10    5.90 
   2   1  22   19.00    6.20 
   3  -1  22  320.67   14.90 
   3   1  22  313.57   16.00 
   4  -2 -22  170.78   12.90 
  -4  -2  22  178.98   11.50 
  -4   2  22  188.38   11.90 
  -3  -2  22  163.78   10.60 
   3  -2 -22  168.58   12.30 
  -3   2  22  172.38   11.50 
   2  -2 -22  243.98   14.50 
  -2  -2  22  243.08   12.50 
  -2   2  22  226.48   12.70 
  -1  -2  22   16.20    5.50 
  -1   2  22   17.50    5.60 
   0  -2  22  268.27   13.60 
   0   2  22  324.87   14.70 
   1  -2  22   34.90    6.30 
   1   2  22   31.10    6.50 
   2  -2  22  385.26   16.70 
   2   2  22  377.86   17.00 
  -4  -3  22   -2.80    4.50 
   4  -3 -22    3.50    6.50 
  -4   3  22    2.50    5.00 
   3  -3 -22  299.67   17.00 
  -3  -3  22  290.37   14.30 
  -3   3  22  271.27   14.40 
  -2  -3  22   24.20    6.30 
   2  -3 -22   37.10    7.80 
  -2   3  22   23.90    6.20 
  -1  -3  22  265.87   13.10 
  -1   3  22  259.07   13.30 
   0  -3  22    6.90    5.30 
   0   3  22    9.60    5.40 
   1  -3  22  378.46   16.80 
   1   3  22  391.96   17.00 
   2  -3  22   16.70    6.00 
   2   3  22   26.90    7.70 
   3  -4 -22   35.60    7.60 
  -3  -4  22   13.80    5.70 
  -3   4  22   16.50    6.20 
  -2  -4  22  488.55   19.30 
   2  -4 -22  468.05   21.30 
  -2   4  22  447.76   19.40 
   1  -4 -22    3.30    4.90 
  -1  -4  22    0.00    4.80 
  -1   4  22   -3.80    5.10 
   0  -4  22  422.66   17.70 
   0   4  22  417.16   17.80 
   1  -4  22    2.50    4.90 
   1   4  22    6.90    5.80 
  -2  -5  22    3.00    5.00 
   2  -5 -22   -3.60    5.20 
  -2   5  22    1.10    5.00 
  -1  -5  22  169.48   10.50 
   1  -5 -22  154.28   12.30 
  -1   5  22  151.68   10.50 
   0   5  22   -1.90    5.00 
  -4   0  23    4.60    5.20 
  -3   0  23  430.46   18.50 
  -2   0  23   -0.50    4.50 
  -1   0  23  430.46   18.20 
   0   0  23   16.30    5.60 
   1   0  23  200.98   11.50 
   2   0  23    0.60    4.90 
  -4  -1  23  320.37   15.70 
   4  -1 -23  304.87   17.30 
  -4   1  23  337.87   15.90 
  -3  -1  23    2.10    4.50 
  -3   1  23    4.60    4.80 
  -2  -1  23  364.76   16.50 
  -2   1  23  339.77   16.10 
  -1  -1  23   10.70    5.30 
  -1   1  23    8.30    5.30 
   0  -1  23  570.04   22.70 
   0   1  23  642.74   23.10 
   1  -1  23    4.70    5.10 
   1   1  23    6.80    5.30 
   2  -1  23  356.76   16.00 
   2   1  23  353.26   16.70 
   4  -2 -23    3.60    5.50 
  -4  -2  23   -1.10    4.90 
  -4   2  23    3.80    5.60 
   3  -2 -23  251.97   15.10 
  -3  -2  23  244.98   13.00 
  -3   2  23  234.28   13.20 
  -2  -2  23   21.80    5.90 
  -2   2  23   14.10    5.90 
  -1  -2  23  472.75   19.40 
   0  -2  23    0.90    4.70 
   0   2  23    0.30    5.30 
   1  -2  23  321.07   15.30 
   1   2  23  350.66   15.80 
   2  -2  23   15.60    6.40 
   2   2  23   33.90    7.90 
  -3  -3  23  166.88   10.90 
   3  -3 -23  183.28   13.10 
  -3   3  23  148.79   10.90 
   2  -3 -23  279.97   16.20 
  -2  -3  23  311.47   14.80 
  -2   3  23  267.57   14.30 
  -1  -3  23    1.50    4.50 
  -1   3  23    2.00    5.60 
   0  -3  23  120.09    9.40 
   0   3  23  149.49   10.20 
   1  -3  23   14.80    5.60 
   1   3  23   17.60    6.50 
  -3  -4  23  183.58   11.90 
   3  -4 -23  169.48   13.10 
  -3   4  23  160.38   11.40 
  -2  -4  23   12.90    5.70 
   2  -4 -23   15.10    6.20 
  -2   4  23   11.30    6.50 
  -1  -4  23  219.58   12.30 
  -1   4  23  210.98   12.30 
   0  -4  23   13.60    5.60 
   0   4  23    6.90    5.60 
   1  -4  23  336.57   17.80 
   1   4  23  366.36   16.80 
  -4   0  24  244.68   13.80 
  -3   0  24    5.60    5.40 
  -2   0  24  417.56   18.40 
  -1   0  24   15.80    5.90 
   0   0  24  517.15   20.80 
   1   0  24    0.30    5.00 
  -3  -1  24  469.25   19.60 
  -3   1  24  456.25   19.80 
  -2  -1  24   -2.50    4.80 
  -2   1  24    0.20    5.00 
  -1  -1  24  314.47   15.40 
  -1   1  24  332.27   15.80 
   0  -1  24    8.00    5.30 
   0   1  24   11.20    6.20 
   1  -1  24  213.68   12.20 
   1   1  24  213.58   12.30 
  -3  -2  24   23.60    6.40 
   3  -2 -24   10.30    6.10 
  -3   2  24   18.30    6.50 
  -2  -2  24  294.57   14.30 
  -2   2  24  251.57   14.20 
  -1  -2  24    6.40    5.80 
  -1   2  24   11.50    5.90 
   0  -2  24  527.25   21.80 
   0   2  24  561.94   22.10 
   1  -2  24    7.40    5.80 
   1   2  24   17.50    6.40 
   3  -3 -24   41.00    8.70 
  -3  -3  24   49.30    7.80 
  -3   3  24   51.79    8.80 
  -2  -3  24    1.30    4.90 
  -2   3  24    0.50    5.30 
  -1  -3  24  394.56   17.30 
  -1   3  24  352.56   17.00 
   0  -3  24   22.40    6.80 
   0   3  24   26.80    6.90 
  -1  -4  24    4.80    5.30 
  -1   4  24   -7.20    5.20 
  -3   0  25  394.26   18.10 
  -2   0  25   -3.80    5.70 
  -1   0  25  343.37   16.50 
   0   0  25    9.00    5.80 
  -3  -1  25   18.50    6.20 
  -3   1  25   19.20    6.60 
  -2  -1  25  322.07   15.60 
  -2   1  25  303.77   15.70 
  -1  -1  25    8.90    5.70 
  -1   1  25    8.20    5.70 
   0  -1  25  316.77   15.60 
   0   1  25  318.97   16.20 
  -2  -2  25   10.50    5.40 
  -2   2  25    3.30    5.60 
  -1  -2  25  451.25   19.10 
  -1   2  25  426.96   19.20 
   0  -2  25   11.10    5.70 
   0   2  25    6.90    5.90 
; 
# end of ARCHIVE-HKL.CIF 
