# Supplementary material for: Palladium(II) Complexes of Substituted Salicylaldehydes: Synthesis, Characterization and Investigation of Their Biological Profile
Source: Pharmaceuticals (Basel). 2022 Jul 18;15(7):886. doi: 10.3390/ph15070886 (PMC9323974; doi:10.3390/ph15070886)
Supplement: Supplementary file 1 [file pharmaceuticals-15-00886-s001.zip › pharmaceuticals-1806791 - REVISED ESI.pdf]

# **Palladium(II) complexes of substituted salicylaldehydes: Synthesis, characterization and investigation of their biological profile**

**Ariadni Zianna,<sup>a,\*</sup> George Geromichalos,<sup>a,\*</sup> Augusta–Maria Fiotaki,<sup>b</sup> Antonios G. Hatzidimitriou,<sup>a</sup> Stavros Kalogiannis,<sup>b</sup> George Psomas,<sup>a,\*</sup>**

*<sup>a</sup> Laboratory of Inorganic Chemistry, Department of Chemistry, Aristotle University of Thessaloniki, Thessaloniki GR–54124, GREECE.*

*<sup>b</sup> Department of Nutritional Sciences and Dietetics, International Hellenic University, Sindos, Thessaloniki, GREECE.*

## **Supplementary information**

---

\* Corresponding authors' e-mails:

[ariadnezianna@gmail.com](mailto:ariadnezianna@gmail.com) (A. Zianna); [geromchem@yahoo.gr](mailto:geromchem@yahoo.gr) (G. Geromichalos); [gepsomas@chem.auth.gr](mailto:gepsomas@chem.auth.gr) (G. Psomas)

| Content                                                                                                                                                                                                                                                                                                                                                                                | Page |
|----------------------------------------------------------------------------------------------------------------------------------------------------------------------------------------------------------------------------------------------------------------------------------------------------------------------------------------------------------------------------------------|------|
| S1 Antioxidant biological assay                                                                                                                                                                                                                                                                                                                                                        | 5    |
| S1.1 Determination of the reducing activity of the stable radical DPPH                                                                                                                                                                                                                                                                                                                 | 5    |
| S1.2 Assay of radical cation ABTS–scavenging activity                                                                                                                                                                                                                                                                                                                                  | 5    |
| S1.3 Reduction of hydrogen peroxide                                                                                                                                                                                                                                                                                                                                                    | 5    |
| S2 Antibacterial activity                                                                                                                                                                                                                                                                                                                                                              | 7    |
| S3 Interaction with CT DNA                                                                                                                                                                                                                                                                                                                                                             | 8    |
| S3.1 Binding study with CT DNA by UV–vis spectroscopy                                                                                                                                                                                                                                                                                                                                  | 8    |
| S3.2 CT DNA–binding studies by viscosity measurements                                                                                                                                                                                                                                                                                                                                  | 8    |
| S3.3 EB–displacement studies                                                                                                                                                                                                                                                                                                                                                           | 8    |
| S4 Interaction with serum albumins                                                                                                                                                                                                                                                                                                                                                     | 10   |
| S4.1 Study of the affinity for serum albumins                                                                                                                                                                                                                                                                                                                                          | 10   |
| S4.2 Competitive SA–fluorescence studies with warfarin and ibuprofen                                                                                                                                                                                                                                                                                                                   | 11   |
| S5. <i>In silico</i> computational methods                                                                                                                                                                                                                                                                                                                                             | 12   |
| S5.1 Molecular modeling and docking calculations                                                                                                                                                                                                                                                                                                                                       | 12   |
| S5.2 Molecular pharmacokinetic properties, drug-likeness, target proteins and toxicity prediction methods                                                                                                                                                                                                                                                                              | 14   |
| S5.2.1 Calculation of molecular properties and prediction of drug-likeness                                                                                                                                                                                                                                                                                                             | 14   |
| S5.2.1.1 Molecular properties prediction                                                                                                                                                                                                                                                                                                                                               | 14   |
| S5.2.1.2 Drug–likeness                                                                                                                                                                                                                                                                                                                                                                 | 15   |
| S5.2.1.3 Bioactivity score                                                                                                                                                                                                                                                                                                                                                             | 17   |
| S5.2.2 Prediction of toxicity                                                                                                                                                                                                                                                                                                                                                          | 17   |
| S5.2.2.1 Acute rat toxicity prediction by GUSAR (on the Basis of PASS Prediction)                                                                                                                                                                                                                                                                                                      | 18   |
| S5.2.2.2 Substrate/Metabolite specificity Prediction (SMP)                                                                                                                                                                                                                                                                                                                             | 19   |
| S5.2.2.3 Sites of metabolism prediction (SOMP)                                                                                                                                                                                                                                                                                                                                         | 19   |
| S5.2.2.4 ROSC–Pred: Rodent Organ–Specific Carcinogenicity Prediction                                                                                                                                                                                                                                                                                                                   | 20   |
| S5.2.2.5 Quantitative prediction of anti-target interaction profiles for chemical compounds by GUSAR software                                                                                                                                                                                                                                                                          | 20   |
| S5.2.2.6 Environmental ecotoxicity predicted by GUSAR                                                                                                                                                                                                                                                                                                                                  | 22   |
| S5.2.2.7 CLC–Pred: in silico prediction of cytotoxicity for tumor and non-tumor cell lines                                                                                                                                                                                                                                                                                             | 22   |
| S5.2.2.8 Prediction of activity spectra                                                                                                                                                                                                                                                                                                                                                | 22   |
| S5.2.2.9 Drug–induced gene expression profiles prediction (DIGEP–Pred)                                                                                                                                                                                                                                                                                                                 | 23   |
| S6 References                                                                                                                                                                                                                                                                                                                                                                          | 25   |
| Figure S1. UV-vis spectra of DMSO solution of (A) <b>1</b> ( $10^{-4}$ M), (B) <b>3</b> ( $10^{-4}$ M), (C) <b>4</b> ( $10^{-4}$ M), (D) 4–Et <sub>2</sub> N–salOH ( $10^{-5}$ M) and (E) 5–F–salOH ( $10^{-4}$ M) in the presence of increasing amounts of CT DNA. The arrows show the changes upon increasing amounts of CT DNA.                                                     | 30   |
| Figure S2. Plot of $\frac{[DNA]}{(\epsilon_A - \epsilon_f)}$ versus [DNA] for (A)–(G) 4–Et <sub>2</sub> N–salOH, 5–F–salOH and complexes <b>1–5</b> , respectively.                                                                                                                                                                                                                    | 31   |
| Figure S3. Plot of EB–DNA relative fluorescence emission intensity at $\lambda_{\text{emission}} = 592$ nm (%) versus $r$ ( $r = [\text{complex}]/[\text{DNA}]$ ) in the presence of complexes <b>1–5</b> (up to 48.8 % of the initial EB–DNA fluorescence emission intensity for <b>1</b> , 35.2 % for <b>2</b> , 39.4 % for <b>3</b> , 48.6 % for <b>4</b> and 55.8% for <b>5</b> ). | 32   |

|                                                                                                                                                                                                                                                                                                                                                                                                                                                                                                                                                                                                                                                                                                                                                                  |    |
|------------------------------------------------------------------------------------------------------------------------------------------------------------------------------------------------------------------------------------------------------------------------------------------------------------------------------------------------------------------------------------------------------------------------------------------------------------------------------------------------------------------------------------------------------------------------------------------------------------------------------------------------------------------------------------------------------------------------------------------------------------------|----|
| Figure S4. Stern–Volmer quenching plot of EB bound to CT DNA for (A)–(G) 4–Et <sub>2</sub> N–salOH, 5–F–salOH and complexes <b>1–5</b> , respectively.                                                                                                                                                                                                                                                                                                                                                                                                                                                                                                                                                                                                           | 33 |
| Figure S5. (A) Plot of % relative BSA–fluorescence emission intensity at $\lambda_{em}$ = 351 nm (%) vs $r$ ( $r$ = [complex]/[BSA]) for complexes <b>1–5</b> (up to 7.2 % of the initial BSA fluorescence for <b>1</b> , 2.5 % for <b>2</b> , 2.8% for <b>3</b> , 14.3% for <b>4</b> and 2.8% for <b>5</b> ) in buffer solution (150 mM NaCl and 15 mM trisodium citrate at pH 7.0). (B) Plot of % relative HSA–fluorescence emission intensity at $\lambda_{em}$ = 342 nm (%) vs $r$ ( $r$ = [complex]/[HSA]) for complexes <b>1–5</b> (up to 8.2% of the initial HSA fluorescence for <b>1</b> , 11.2% for <b>2</b> , 9.6% for <b>3</b> , 24.3% for <b>4</b> and 7.8 % for <b>5</b> ) in buffer solution (150 mM NaCl and 15 mM trisodium citrate at pH 7.0). | 34 |
| Figure S6. Stern–Volmer quenching plot of BSA for (A)–(G) 4–Et <sub>2</sub> N–salOH, 5–F–salOH and complexes <b>1–5</b> , respectively.                                                                                                                                                                                                                                                                                                                                                                                                                                                                                                                                                                                                                          | 35 |
| Figure S7. Stern–Volmer quenching plot of HSA for (A)–(H) 4–Et <sub>2</sub> N–salOH, 5–F–salOH, 4–MeO–salOH and complexes <b>1–5</b> , respectively.                                                                                                                                                                                                                                                                                                                                                                                                                                                                                                                                                                                                             | 36 |
| Figure S8. Scatchard plot of BSA for (A)–(G) 4–Et <sub>2</sub> N–salOH, 5–F–salOH and complexes <b>1–5</b> , respectively.                                                                                                                                                                                                                                                                                                                                                                                                                                                                                                                                                                                                                                       | 37 |
| Figure S9. Scatchard plots of HSA for (A)–(H) 4–Et <sub>2</sub> N–salOH, 5–F–salOH, 4–MeO–salOH and complexes <b>1–5</b> , respectively.                                                                                                                                                                                                                                                                                                                                                                                                                                                                                                                                                                                                                         | 38 |
| Figure S10. Scatchard plots of BSA–ibuprofen for (A)–(H) 4–Et <sub>2</sub> N–salOH, 5–F–salOH, 4–MeO–salOH and complexes <b>1–5</b> , respectively.                                                                                                                                                                                                                                                                                                                                                                                                                                                                                                                                                                                                              | 39 |
| Figure S11. Scatchard plot of BSA–warfarin for (A)–(H) 4–Et <sub>2</sub> N–salOH, 5–F–salOH, 4–MeO–salOH and complexes <b>1–5</b> , respectively.                                                                                                                                                                                                                                                                                                                                                                                                                                                                                                                                                                                                                | 40 |
| Figure S12. Scatchard plots of HSA–ibuprofen for (A)–(H) 4–Et <sub>2</sub> N–salOH, 5–F–salOH, 4–MeO–salOH and complexes <b>1–5</b> , respectively.                                                                                                                                                                                                                                                                                                                                                                                                                                                                                                                                                                                                              | 41 |
| Figure S13. Scatchard plots of HSA–warfarin for (A)–(H) 4–Et <sub>2</sub> N–salOH, 5–F–salOH, 4–MeO–salOH and complexes <b>1–5</b> , respectively.                                                                                                                                                                                                                                                                                                                                                                                                                                                                                                                                                                                                               | 42 |
| Figure S14. Depiction of computed frontier molecular orbitals HOMO and LUMO (solid surface) (left panel), MEP map (center panel, transparent surface), and LIP map (right panel, transparent surface) for complexes <b>1–5</b> .                                                                                                                                                                                                                                                                                                                                                                                                                                                                                                                                 | 43 |
| Figure S15. Docking pose orientation of <b>2</b> on the crystal structure of the FLT3 kinase domain (PDB: 6jqr) bound with the FLT3 inhibitor Gilteritinib and <b>5</b> on the crystal structure of JAK2 kinase domain (PDB: 2b7a) bound with its inhibitor CMP6.                                                                                                                                                                                                                                                                                                                                                                                                                                                                                                | 44 |
| Table S1. Crystallographic data, data collection and refinement details for complex <b>1</b> .                                                                                                                                                                                                                                                                                                                                                                                                                                                                                                                                                                                                                                                                   | 45 |
| Table S2. Binding interactions of complex <b>1</b> with CT DNA (Atom numbering and bond lengths are derived from PyMol software).                                                                                                                                                                                                                                                                                                                                                                                                                                                                                                                                                                                                                                | 46 |
| Table S3. Binding interactions of lowest energy binding pose of complex <b>3</b> with <i>E. coli</i> and <i>S. aureus</i> DNA-gyrases (PDB accession numbers: 1KZN, and 5CDM, respectively). (Atom numbering and bond lengths are derived from PyMol software) (type of interaction: $\pi$ – $\pi$ : pi–pi sandwich, $\pi$ –alkyl: pi–alkyl hydrophobic, $\pi$ –cation and $\pi$ –anion: pi–charged electrostatic interactions, $\pi$ –polar: pi–polar, Hb: hydrogen bond, Hph: hydrophobic, P: polar, Halogen bond) (all binding contact residues are common with that of CBN).                                                                                                                                                                                 | 47 |
| Table S4. Binding interactions of lowest energy binding pose of complexes <b>1</b> with 5–LOX bound with NDGA (PDB accession number 6N2W), and <b>3</b> with FLAP protein bound with MK-591 (PDB ID: 2Q7M). (Atom numbering and bond lengths are derived from PyMol software) (type of interaction: Hb: hydrogen bond, Hph: hydrophobic, P: polar, $\pi$ –alkyl: pi–alkyl hydrophobic, $\pi$ –cation: pi–charged electrostatic interactions, $\pi$ –polar: pi–polar)                                                                                                                                                                                                                                                                                             | 48 |

|                                                                                                                                                                                                                                                                                                                                                                                                                                                                                      |     |
|--------------------------------------------------------------------------------------------------------------------------------------------------------------------------------------------------------------------------------------------------------------------------------------------------------------------------------------------------------------------------------------------------------------------------------------------------------------------------------------|-----|
| (binding contact residues denoted in asterisk are common with that of trolox).                                                                                                                                                                                                                                                                                                                                                                                                       |     |
| Table S5. Calculated molecular physicochemical pharmacokinetics properties of complexes <b>1–5</b> related to Lipinski's Rule of Five with the aid of Molinspiration property engine v2018.10.                                                                                                                                                                                                                                                                                       | 49  |
| Table S6. Determination of drug-likeness score of complexes <b>1–5</b> through molinspiration bioactivity score v2018.03.                                                                                                                                                                                                                                                                                                                                                            | 50  |
| Table S7. Rat acute toxicity predicted by GUSAR (on the Basis of PASS Prediction) for complexes <b>1–5</b> .                                                                                                                                                                                                                                                                                                                                                                         | 51  |
| Table S8. Substrate/Metabolite specificity Prediction (SMP) for complexes <b>1–5</b> .                                                                                                                                                                                                                                                                                                                                                                                               | 52  |
| Table S9. ROSC–Pred: Rodent Organ–Specific Carcinogenicity Prediction for complexes <b>1–5</b> .                                                                                                                                                                                                                                                                                                                                                                                     | 56  |
| Table S10. Quantitative prediction of anti-target interaction profiles for complexes <b>1–5</b> .                                                                                                                                                                                                                                                                                                                                                                                    | 59  |
| Table S11. Environmental ecotoxicity prediction for complexes 1–5 by GUSAR.                                                                                                                                                                                                                                                                                                                                                                                                          | 64  |
| Table S12. CLC–Pred: in silico prediction of cytotoxicity for tumor and non-tumor cell lines (results for $P_a > 0.3$ , $P_a > 0.5$ , and $P_a > P_i$ ).                                                                                                                                                                                                                                                                                                                             | 66  |
| Table S13. Sites of metabolism prediction (SOMP) for complexes <b>1–5</b> by GUSAR.                                                                                                                                                                                                                                                                                                                                                                                                  | 75  |
| Table S14. Prediction of activity spectra for complexes <b>1–5</b> , for $P_a > 0.7$ and $P_a > 0.0$ .                                                                                                                                                                                                                                                                                                                                                                               | 105 |
| Table S15. Drug–induced gene expression profiles prediction (DIGEP–Pred). mRNA based, protein based, MCF-7 based, VCaP 6h based, VCaP 24h based, and combination prediction results for complexes <b>1–5</b> . The name of each gene can be correlated with diseases, side-effects and biological pathways in Comparative Toxicogenomics Database (CTD), Mount Desert Island Biological Laboratory, Salisbury Cove, Maine ( <a href="http://ctdbase.org/">http://ctdbase.org/</a> ). | 293 |

## **S1 Antioxidant biological assay**

The antioxidant activity of the compounds was evaluated *via* their ability to scavenge *in vitro* free radicals such as DPPH and ABTS and to reduce H<sub>2</sub>O<sub>2</sub>. All the experiments were carried out at least in triplicate and the standard deviation of absorbance was less than 10% of the mean.

### **S1.1 Determination of the reducing activity of the stable radical DPPH**

To an ethanolic solution of DPPH (0.1 mM) an equal volume solution of the compounds (0.1 mM) in ethanol was added. Absolute ethanol was also used as control solution. The absorbance at 517 nm was recorded at room temperature after 30 and 60 min, in order to examine the possible existence of a potential time-dependence of the DPPH radical scavenging activity [S1]. The DPPH-scavenging activity of the compounds was expressed as the percentage reduction of the absorbance values of the initial DPPH solution (DPPH%). NDGA and BHT were used as reference compounds.

### **S1.2 Assay of radical cation ABTS-scavenging activity**

The ABTS assay was performed to determine the activity of the compounds to scavenge the radical cation ABTS. Initially, a water solution of ABTS was prepared (2 mM). ABTS radical cation (ABTS<sup>•+</sup>) was produced by the reaction of ABTS stock solution with potassium persulfate (0.17 mM) and the mixture was stored in the dark at room temperature for 12–16 h before its use. The ABTS was oxidized incompletely because the stoichiometric reaction ratio of ABTS and potassium persulfate is 1:0.5. The absorbance became maximal and stable only after more than 6 h of reaction although the oxidation of the ABTS started immediately. The radical was stable in this form for more than 2 days when allowed to stand in the dark at room temperature. Afterwards, the ABTS<sup>•+</sup> solution was diluted in ethanol to an absorbance of 0.70 at 734 nm and 10 µL of diluted compounds or standards (0.1 mM) in DMSO were added. The absorbance was recorded out exactly 1 min after initial mixing [S1]. The ABTS radical scavenging activity was expressed as the percentage inhibition of the absorbance of the initial ABTS solution (ABTS%). Trolox was used as an appropriate standard.

### **S1.3 Reduction of hydrogen peroxide**

The ability of the compounds to reduce hydrogen peroxide (H<sub>2</sub>O<sub>2</sub>) was estimated according to the method described in the literature [S2]. The reaction mixture contained 20 µL of each of the tested compounds (0.1 mM) and 5 µL H<sub>2</sub>O<sub>2</sub> solution (40 mM) in phosphate buffer (50 mM, pH 7.4). The absorbance was measured at 230 nm after 10 min. The antioxidant activity (reduction of

hydrogen peroxide) of the compounds was expressed as the percentage decrease of the initial  $\text{H}_2\text{O}_2$  solution ( $\text{H}_2\text{O}_2\%$ ). Ascorbic acid (or vitamin C) was used as a standard.

## S2 Antibacterial activity

The antimicrobial activity of the compounds was evaluated by determining their respective MIC values towards two Gram–(–) (*Escherichia coli* NCTC 29212 (*E. coli*) and *Xanthomonas campestris* ATCC 1395 (*X. campestris*)) and two Gram–(+) (*Staphylococcus aureus* ATCC 6538 (*S. aureus*) and *Bacillus subtilis* ATCC 6633 (*B. subtilis*)) bacterial species. Cultures of these microbial strains were grown on a rich selective agar medium and stored at 4°C. The selective media used were Nutrient Agar or Broth for *B. subtilis* and *S. aureus*, Yeast Mold Agar or Broth for *X. campestris* and Luria Agar or Broth for *E. coli*. Cells picked from the surface of the stored cultures were used to initiate liquid pre–cultures of the same selective medium at an initial turbidity of roughly 1 McFarland unit. Pre–cultures were incubated for 24 h in a rotary shaking incubator and subsequently they were used to inoculate the test cultures used for the determination of MIC at an initial turbidity of 0.5 McFarland units. The test cultures consisted of Mueller–Hinton broth (Deben Diagnostics Ltd) containing different concentrations of the compounds.

Different concentrations were achieved as follows: the compounds were freshly dissolved in DMSO to a concentration of 1 mg mL<sup>–1</sup> and they were diluted with DMSO, using the method of progressive double dilution. Therefore, working solutions with decreasing concentrations of the compounds under investigation were achieved. The working solutions were subsequently diluted to the final desired concentration by addition to the growth medium at a proportion of 2:98. MIC values were determined as the lowest concentrations of the tested compounds that inhibited visible growth of each respective organism after a 24 h incubation [S3]. Bacterial growth was determined by measuring the turbidity of appropriately diluted cultures at 600 nm with reference to equally diluted sterile growth medium and the inhibition achieved was calculated by comparing the turbidity of each culture to the average of the turbidity of three non–inhibited cultures. All test cultures were grown in triplicates and for the determination of MIC, growth had to be inhibited in at least two cultures of the triplicate. Incubation temperature at all stages was 37°C except for *X. campestris* that was cultivated at 28°C [S4].

### S3 Interaction with CT DNA

The interaction of X-saloH and complexes **1–5** with CT-DNA was investigated by UV-vis spectroscopy, viscosity measurements and fluorescence emission spectroscopy studies.

#### S3.1 Binding study with CT DNA by UV-vis spectroscopy

UV-vis spectroscopy was used for the evaluation of the interaction of the compounds with CT DNA, and specifically the possible binding modes of the compounds to CT DNA. Control experiments with DMSO were performed and no changes in the spectra of CT DNA were observed.

In order to determine the binding mode, the UV-vis spectra of the compounds were recorded for a constant concentration ( $10^{-5}$ – $10^{-4}$  M) at the corresponding  $\lambda_{\max}$  with increasing concentrations of CT DNA for diverse  $r$  ( $r = [\text{complex}]/[\text{DNA}]$ ) values. Effective use of the changes in the absorbance of the UV-vis spectra was made and the DNA-binding constants ( $K_b$ ,  $M^{-1}$ ) of the compounds were calculated by the Wolfe-Shimer equation (eq. S1) [S5] and the plots  $[\text{DNA}]/(\varepsilon_A - \varepsilon_f)$  versus  $[\text{DNA}]$ :

$$\frac{[\text{DNA}]}{(\varepsilon_A - \varepsilon_f)} = \frac{[\text{DNA}]}{(\varepsilon_b - \varepsilon_f)} + \frac{1}{K_b(\varepsilon_b - \varepsilon_f)} \quad (\text{eq. S1})$$

where  $[\text{DNA}]$  = the concentration of DNA in base pairs,  $\varepsilon_f$  = the extinction coefficient for the free compound at the corresponding  $\lambda_{\max}$ ,  $\varepsilon_A = A_{\text{obsd}}/[\text{compound}]$  and  $\varepsilon_b$  = the extinction coefficient for the compound in the fully bound form.  $K_b$  is given by the ratio of slope to the y intercept in plots  $[\text{DNA}]/(\varepsilon_A - \varepsilon_f)$  versus  $[\text{DNA}]$ .

#### S3.2 CT DNA-binding studies by viscosity measurements

The viscosity of DNA (0.1 mM) in buffer solution was measured in the absence and presence of increasing amounts of the compounds. The experiments were executed at room temperature and the measurements are devised in a plot  $(\eta/\eta_0)^{1/3}$  versus  $r$ , where  $\eta$  = the viscosity of DNA in the presence of the compound, and  $\eta_0$  = the viscosity of neat DNA in buffer solution.

#### S3.3 EB-displacement studies

In order to determine and confirm the DNA-binding mode of the compounds, a competitive study with EB as an intercalating marker is performed by fluorescence emission spectroscopy. Therefore, the EB-displacing ability of the compounds from its EB-DNA conjugate was examined.

The DNA-EB adduct was prepared by addition of 20  $\mu\text{M}$  EB and 26  $\mu\text{M}$  CT DNA in buffer solution (150 mM NaCl and 15 mM trisodium citrate at pH 7.0). The potential intercalation of the compounds between the DNA-bases was studied by the addition of a certain amount of the

compound solution into the EB–DNA adduct solution. The influence of the compounds on the EB–DNA solution was monitored through the changes of the fluorescence emission spectra at excitation wavelength ( $\lambda_{\text{ex}}$ ) at 540 nm [S6]. The tested compounds do not show any significant fluorescence at room temperature in solution or in the presence of DNA, under the same experimental conditions ( $\lambda_{\text{ex}} = 540$  nm). Bearing that in mind, the observed quenching of the EB–DNA solution is evidently associated to the displacement of EB from its EB–DNA adduct.

The quenching efficiency ( $K_{\text{SV}}$ ) for each compound was assessed according to the Stern–Volmer equation (eq. S2) [S6]:

$$\frac{I_0}{I} = 1 + k_q \tau_0 [Q] = 1 + K_{\text{SV}} [Q] \quad (\text{eq. S2})$$

where  $I_0$  and  $I$  = the fluorescence emission intensities of EB–DNA in the absence and presence of the quencher, respectively,  $[Q]$  = the concentration of the quencher (i.e. compounds).  $K_{\text{SV}}$  is obtained from the Stern–Volmer plots by the slope of the diagram  $I_0/I$  *versus*  $[Q]$ . Taking  $\tau_0 = 23$  ns as the fluorescence lifetime of the EB–DNA system [S7], the EB–DNA quenching constants ( $k_q$ , in  $\text{M}^{-1}\text{s}^{-1}$ ) of the compounds can be determined according to equation S3:

$$K_{\text{SV}} = k_q \tau_0 \quad (\text{eq. S3})$$

## S4 Interaction with serum albumins

### S4.1 Study of the affinity for serum albumins

The albumin–binding study for the compounds was carried out by fluorescence emission quenching experiments using BSA (3  $\mu$ M) or HSA (3  $\mu$ M) in buffer solution (15 mM trisodium citrate and 150 mM NaCl at pH 7.0). The tested compounds were used as quenchers with gradually increasing concentrations to monitor the quenching of the emission intensity of tryptophan residues of BSA at 345 nm or HSA at 340 nm [S6]. The fluorescence emission spectra were recorded between 300–500 nm with excitation wavelength of 295 nm. All the experiments were conducted at room temperature. The fluorescence spectra of the compounds were recorded under the same experimental conditions and presented a low–intensity emission band in the region 395–415 nm. Consequently, the SA fluorescence emission spectra were modified properly, by subtracting the spectra of the compounds, and quantitative studies followed.

The extent of the inner–filter effect can be roughly estimated with the following formula:

$$I_{\text{corr}} = I_{\text{meas}} \times 10^{\frac{\varepsilon(\lambda_{\text{exc}})cd}{2}} \times 10^{\frac{\varepsilon(\lambda_{\text{em}})cd}{2}} \quad (\text{eq. S4})$$

where  $I_{\text{corr}}$  = corrected intensity,  $I_{\text{meas}}$  = the measured intensity,  $c$  = the concentration of the quencher,  $d$  = the cuvette length (1 cm),  $\varepsilon(\lambda_{\text{exc}})$  and  $\varepsilon(\lambda_{\text{em}})$  = the  $\varepsilon$  of the quencher at the excitation and the emission wavelength, respectively, as calculated from the UV–vis spectra of the complexes [S8].

The interaction of the quencher (i.e. compounds) with serum albumins [S6] was studied through the Stern–Volmer and Scatchard equations [S6] and corresponding graphs. The values of the respective Stern–Volmer constant  $K_{\text{SV}}$  ( $\text{M}^{-1}$ ), the quenching constant  $k_q$  ( $\text{M}^{-1}\text{s}^{-1}$ ), the SA–binding constant  $K$  ( $\text{M}^{-1}$ ) and the number of binding sites per albumin ( $n$ ) were calculated.

According to Stern–Volmer quenching equation [S6] (eq. S2), where  $I_0$  = the initial tryptophan fluorescence intensity of SA,  $I$  = the tryptophan fluorescence intensity of SA after the addition of the quencher,  $k_q$  = the quenching rate constants of SA,  $K_{\text{SV}}$  = the dynamic quenching constant,  $\tau_0$  = the average lifetime of SA without the quencher,  $[Q]$  = the concentration of the quencher), the Stern–Volmer constant ( $K_{\text{SV}}$ ,  $\text{M}^{-1}$ ) can be obtained by the slope of the diagram  $I_0/I$  versus  $[Q]$ . Taking  $\tau_0 = 10^{-8}$  s as fluorescence lifetime of tryptophan in SA [S2], the quenching constant ( $k_q$ ,  $\text{M}^{-1}\text{s}^{-1}$ ) is calculated from equation S3.

From the Scatchard equation (eq. S5) [S6]:

$$\frac{\Delta I/I_0}{[Q]} = nK - K \frac{\Delta I}{I_0} \quad (\text{eq. S5})$$

where  $n$  = the number of binding sites per albumin and  $K$  = the SA-binding constant. The  $K$  constant ( $M^{-1}$ ) is calculated from the slope in plots  $(\Delta I/I_0)/[Q]$  *versus*  $(\Delta I/I_0)$  and  $n$  is given by the ratio of y intercept to the slope [S9].

#### **S4.2 Competitive SA-fluorescence studies with warfarin and ibuprofen**

The competitive studies with warfarin or ibuprofen (site probes) [S10] were performed by tryptophan fluorescence quenching experiments using a fixed concentration of the BSA and site probes (3  $\mu M$ ) in buffer (containing 15 mM trisodium citrate and 150 mM NaCl at pH 7.0). The fluorescence emission spectra were recorded in the presence of increasing amounts of the compounds as quenchers with an excitation wavelength of 295 nm. The Scatchard equation (eq. 7) [S6] and plots were applied on the corrected SA-fluorescence emission spectra in order to determine the BSA-binding constant of the compounds in the presence of warfarin or ibuprofen.

## **S5. *In silico* computational methods**

### **S5.1 Molecular modeling and docking calculations**

The *in silico* predictive tools that have been employed to study the interaction of the compounds with the selected macromolecules, are Schrödinger, Mercury and PyMol molecular modeling software. The 3D structure of the synthesized complex **1** was generated from its X-ray crystal structure as CIF file. Mercury software (<http://www.ccdc.cam.ac.uk/>) was then used to convert the CIF file to PDB format file. Complexes **2-5** were built with the aid of ChemBioDraw Ultra v. 14.0.0.117 software and their structures were optimized with MM2 energy minimization force field method with the aid of ChemBio3D Ultra v. 14.0.0.117 software suite (Cambridge Soft Corporation). The best, most stable (lowest energy) conformation of the molecular model of the complexes were detected by geometrical optimization in the gas phase, as implemented in the Spartan '14 Molecular Modeling program suite (Spartan '14 v.1.1.4, Wavefunction Inc., Irvine, CA, USA; [www.wavefun.com](http://www.wavefun.com)). The structures were initially optimized (via energy minimization) by conformational search using the Monte Carlo method with the MMFF94 molecular mechanics model, included in the Spartan'14 program suite. Geometry optimization (leading to the most stable conformer with the lowest energy) was accomplished via quantum-chemical calculations by utilizing Density functional theory (DFT) computations at B3LYP level of theory with 6-31G\*(d,p) basis set to describe the accurate structural and electronic properties of the compounds, implemented by Spartan' 14 program suite.

Molecular docking calculations were carried out on the crystal structure of the following target macromolecules: the crystal structure of CT DNA (PDB entry code 1BNA), *E. coli* and *S. aureus* DNA-gyrase (PDB entry codes 1KZN and 5CDM, respectively), 5-LOX (PDB entry code 6N2W), FLAP (PDB entry code 2Q7M), FLT3 (PDB entry code 6JQR), and JAK2 (PDB entry code 2B7A), to investigate the effect of the complexes on these targets. X-ray crystal structures of CT DNA dodecamer d(CpGpCpGpApApTpTpCpGpCpG) [S11] *E. coli* DNA-gyrase in complex with bound co-crystallized drug chlorobiocin (CBN) [S12], *S. aureus* DNA-gyrase in complex with bound co-crystallized drugs moxifloxacin (MXF) and QPT-1 [S13], 5-LOX bound to redox-type inhibitor nordihydroguaiaretic acid (NDGA) [S14], the integral membrane protein FLAP in complex with leukotriene biosynthesis inhibitors MK-591 and the iodinated analog of MK-591 [S15], FLT3 bound to co-crystallized inhibitor Gilteritinib, and JAK2 bound to co-crystallized inhibitor CMP6, were obtained from the Brookhaven Protein Data Bank (operated by the Research Collaboratory for Structural Bioinformatics, RCSB) [S16-S18]. The crystal structures of *E. coli* and *S. aureus* DNA-gyrase enzymes have been refined at 2.3 Å and 2.5 Å resolution, respectively, while the crystal

structures of 5-LOX bound with NDGA at 2.71 Å resolution, FLAP bound with MK-591 at 4.25 Å resolution, FLT3 at 2.20 Å resolution, and JAK2 at 2.00 Å resolution.

In our studies, molecular docking calculations were performed with Schrödinger modeling suite having the ability for accurate calculations. The Schrödinger software suite contains a broad array of computational chemistry tools. In the procedure for molecular docking with the employment of Schrödinger suite all compounds were sketched and converted into three-dimensional MOL2 files using Schrödinger Release 2020-3 Maestro Version 11.1 and minimized using LigPrep 3.5 [S19] (which can generate a number of structures from each input structure with various ionization states, tautomers, stereochemical characteristics, and ring conformations to eliminate molecules on the basis of various criteria such as molecular weight or specified numbers and types of functional groups with correct chiralities for each successfully processed input structure), and the OPLS3 (Optimized Potential for Liquid Simulations) [S20] force field for the optimization, producing the low-energy isomers of the ligands (Schrödinger, <http://www.schrodinger.com>). Energy minimized 3D molecular structures were generated with the employment of LigPrep run from Maestro utility of the Schrödinger suite. The ligand preparation included 2D-3D conversions, generating variations, correction, verification and optimization of the structures. A preparation of receptor and ligand structures was integrated before the actual docking procedure [S21]. The crystal structures of the proteins were prepared using the Protein Preparation Wizard [S22], in Schrödinger Suite 2020-3 (Schrödinger, LLC, New York, NY) [S22,S23]. Protein was prepared by adding the hydrogen atoms, optimizing hydrogen bonds, removing atomic clashes, adding formal charges to the hetero groups and then optimizing at neutral pH. Missing loops and side chains were prepared using Prime version 3.2 [S24,S25]. Finally, the structure was minimized using OPLS3 force field. Active site of studied proteins was obtained using SiteMap tool (version 3.6, Schrödinger) [S26,S27], which provides a fast and effective means of identifying potential binding pockets of proteins. SiteMap identifies the character of binding sites using novel search and assesses each site by calculating various properties like size, volume, amino acid exposure, enclosure, contact, hydrophobicity, hydrophilicity and donor/acceptor ratio. Receptor grid was generated around the active site for effective binding using Receptor grid generation in the Glide (version 5.9) application of Maestro. Once the receptor grid is generated, the ligands are docked to the proteins using Glide docking tool of Schrödinger (Grid based **L**igand **D**ocking with **E**nergetics) (version 6.8) [S23,S28]. Compounds were docked in the binding site of the proteins using Induced-Fit Docking (IFD) protocol 2020-3 [S28-S30]. The ligand interactions are shown in Ligand interaction tool of Maestro (Schrödinger). Waters were deleted with Maestro, the graphical user interface (GUI) of Schrödinger software, prior to docking. Molecular docking studies were carried out for the best fitted compounds to the model, while the final selection criteria were compounds docking scores and the presence of crucial

interactions for binding to the studied proteins [S31]. The resulting poses were examined manually and the most promising ones were redocked with IFD calculations. Poses that pass the initial screens enter the final stage of the algorithm, which involves evaluation and minimization of a grid approximation to the OPLS-AA non-bonded ligand-receptor interaction energy. Final scoring is then carried out on the energy-minimized poses. By default, Schrödinger's proprietary GlideScore [S28] multi-ligand scoring function is used to score the poses. The rescoring was performed to calculate and improved binding energy calculations with Prime's Molecular Mechanics-Generalized Born Surface Area (MM-GBSA) protocol using VSGB solvation model [S32,S33]. All complexes showed good docking scores reflecting drug-binding affinities with the studied proteins. PyMol Molecular Graphics System (Schrödinger, LLC. version 2.3.5, [www.pymol.org](http://www.pymol.org)) [S34], was used to visualize the molecules and analyze the results of the docking and to construct the molecular models.

The binding interactions of the studied complexes on the crystal structure of the following target macromolecules: CT DNA (PDB: 1BNA), *E. coli* and *S. aureus* DNA-gyrase (PDB: 1KZN and 5CDM, respectively), 5-LOX (PDB: 6N2W), and FLAP (PDB: 2Q7M), are presented in Tables S2–S4.

## ***S5.2 Molecular pharmacokinetic properties, drug-likeness, target proteins and toxicity prediction methods***

General pharmacological potential, pharmacokinetic properties and toxicity prediction studies were adopted with the employment of various computational tools.

### ***S5.2.1 Calculation of molecular properties and prediction of drug-likeness***

#### ***S5.2.1.1 Molecular properties prediction***

Physicochemical parameters play a vital role in generation and determination of bioactivity of any compound. Molinspiration, web-based cheminformatics software, was used to explore the various parameters such as miLogP, Topological Polar Surface Area (TPSA), molecular weight (MW), number of atoms, number of O or N, number of OH or NH, number of rotatable bonds, volume, and drug likeness including G-protein-coupled receptors ligand (GPCR), ion channel modulator, kinase inhibitor, and nuclear receptor ligand, and the number of violations to Lipinski's rule. MiLogP (octanol/water partition coefficient) was calculated by the method developed by Molinspiration software as a sum of fragment-based contributions and correction factors and used to predict the permeability of molecule across the cell membrane (Molinspiration Cheminformatics, Nova Ulica, Slovensky Grob, Slovakia, 2012, <http://www.molinspiration.com/>). Method is very robust and is able to process practically all organic, and most organometallic molecules. The fragment

contributions were obtained by fitting a training set of >12,000 mostly drug-like molecules with experimental Log $P$  data. In general, theoretical partition coefficient miLog $P$  show high agreement with experimental partition coefficients (log $P_{\text{exp}}$ ) [S35] validating the very good prediction quality of the Molinspiration miLog $P$  model and justifying its use in the popular ZINC database for virtual screening of commercially-available compounds. Lipophilicity of a compound is a measure of its lipophilic (or hydrophobic) character. It is expressed by octanol-water partition coefficient (log $P$ ), which can be determined either experimentally or it can be calculated theoretically (miLog $P$  denotes theoretical octanol/water partition coefficient calculated by Molinspiration software). A high log $P$  value of a compound, i.e., a compound with high lipophilic character that is predominantly dissolved in lipids, is expected to exhibit increased cell permeability as it would be expected to enter cell membrane through simple diffusion without the need of a transport protein [S36]. Nevertheless, the high lipophilicity of a compound can be associated with increased toxicity. Although there is no strong evidence for this correlation [S37], a highly lipophilic compound may be sequestered by fatty tissue and therefore it will be difficult to excrete leading to its accumulation that will impact systemic toxicity [S38]. Therefore, in order to ensure high cell permeability for a potential drug compound, a moderate (not too high, not too low) log $P$  value is needed. Indeed, it has been shown that drugs with good cell permeability exhibit moderate log $P$  values [S39].

TPSA is calculated based on the methodology published by Ertl et al. [S40] as the sum of fragment-based contributions in which O- and N-centered polar fragments are to be considered and calculated by surface areas that are occupied by oxygen and nitrogen atoms and by hydrogen atoms attached to them. TPSA has been used for characterizing drug absorption, including intestinal absorption, bioavailability, Caco-2 permeability, and blood brain barrier permeability. Method for calculation of molecular volume developed by molinspiration is based on group contributions. Number of rotatable bonds (nrotb) is a simple topological parameter that measures molecular flexibility. It has been shown to be a very good descriptor of absorption and oral bioavailability of drugs [S41]. Rotatable bond is defined as any single non-ring bond, bounded to non-terminal heavy (i.e., non-hydrogen) atom. Amide C–N bonds are not considered because they are having high rotational energy barrier. Computation of volume developed at Molinspiration is based on group contributors. It should be mentioning that although tight binding of a drug molecule to its intended target is very important for high potency, poor cell membrane permeability often translates into poor *in vivo* efficacy. Two critical properties that are related to the cell permeability of a potential drug compound are its hydrogen bonding capacity and its lipophilicity [S42–S44].

#### **S5.2.1.2 Drug-likeness**

Drug likeness is a qualitative means of analysis to check whether the given molecule has drug-like properties and it is defined as a complex balance of various molecular properties and structural features which determine whether particular molecule is similar to known drugs that would affect its bioavailability, affinity to proteins, toxicity, and metabolic stability. These properties, mainly hydrophobicity/lipophilicity, electronic distribution, hydrogen bonding characteristics, molecule size, and flexibility and presence of various pharmacophoric features, influence the behavior of a molecule in a living organism, including bioavailability, transport properties, affinity to proteins, reactivity, toxicity, and metabolic stability (Molinspiration Cheminformatics, Nova Ulica, Slovensky Grob, Slovakia, 2012, <http://www.molinspiration.com/>). Through the drug-likeness data, the molecular properties and structure features can be checked with regard to known drugs. There is a number of empirical methods for drug-likeness evaluation of a compound. Lipinski's rule of five (Ro5) [S45], is a rule of thumb to evaluate drug-likeness or determine if a chemical compound with a certain pharmacological or biological activity has chemical properties and physical properties (defined as simple molecular descriptors) that would make it a likely orally active drug in humans (good membrane permeability), based on the observation that most orally administered drugs are relatively small and moderately lipophilic molecules. The rule expresses molecular properties vital for a drug's pharmacokinetics in the human body, including their absorption, distribution, metabolism and elimination (ADME) components of the Lipinski's rule. However, Lipinski specifically states that the Ro5 only holds for compounds that are not substrates for active transporters [S46]. According to Ro5, most "drug-like" molecules have an octanol-water partition coefficient ( $\log P$ )  $\leq 5$  [S47], number of hydrogen bond acceptors (HBA)  $\leq 10$  (nON, nitrogen or oxygen atoms), number of hydrogen bond donors (HBD)  $\leq 5$  (nOHNH, the total number of nitrogen-hydrogen and oxygen-hydrogen bonds), and molecular weight (MW)  $\leq 500$  Da. The violation of 2 or more of these conditions predicts a molecule as a non-orally available drug. In general, poor permeation of a compound is more likely to be observed when HBA and HBD of its molecular structure, according to Ro5, exceed the values of 10 and 5, respectively [S48].

Nevertheless, there are many exceptions to this rule since only about 50 % of orally administered new chemical entities actually obey it [S49]. There are many compounds with two or more Ro5 violations being pursued in drug development. The partition coefficient ( $P$ ) describes the propensity of a neutral (uncharged) compound to dissolve in an immiscible biphasic system of lipid (fats, oils, organic solvents) and water. In simple terms, it measures how much of a solute dissolve in the water portion versus an organic portion. Solutes that are predominantly dissolved in the water layer are called hydrophilic (water liking) and those predominantly dissolved in lipids are lipophilic (lipid liking). The partition coefficient is an important measurement of the physical nature of a substance and thereby a predictor of its behavior in different environments.

Another empirical method to distinguish compounds that are orally active, from those that are not, is given by the Veber's Rule [S41], which uses the number of rotatable bonds and the TPSA of a potential drug molecule, further questioning a 500 molecular weight cutoff. The TPSA and the nrotb have been found to better discriminate between compounds that are orally active and those that are not for a large data set of compounds in the rat. According to Veber's Rule compounds which meet only the two criteria of 10 or fewer rotatable bonds and polar surface area no greater than 140 Å<sup>2</sup> are predicted to have good oral bioavailability.

Furthermore, according to Ghose filter [S50] the number of all atoms (natoms) should be restricted from 20 to 70.

#### **S5.2.1.3 Bioactivity score**

The drug-likeness score of lead molecules and their bioactivity scores are determined with combination of GPCR, ion channel modulator, kinase inhibitor, nuclear receptor ligands, protease inhibitor, and enzyme inhibitor, which has been applied to investigate the efficiency of molecules to qualify for drug development. All the parameters were determined with the aid of Molinspiration drug-likeness score online ([www.molinspiration.com](http://www.molinspiration.com)). The calculated drug-likeness score of each compound was compared with the specific bodily process of each compound, and the results were compared with Naringenin. For organic molecules the probability is if the bioactivity score is (> 0), then it is active; if (−5.0–0.0), then moderately active; if (< −5.0), then inactive. The larger the value of the bioactivity score is, the higher is the probability of the specific molecule to be active [S51]. If bioactivity score of a molecule is greater than 0.00, has considerable biological activities and score between −0.50 to 0.00 is considered to be moderately active and if value is less than −0.50 it is presumed to be inactive. Drug-likeness may be defined as a complex balance of various molecular properties and structure features which determine whether particular molecule is similar to the known drugs. These properties, mainly hydrophobicity, electronic distribution, hydrogen bonding characteristics, molecule size and flexibility and of course presence of various pharmacophoric features influence the behavior of molecule in a living organism, including bioavailability, transport properties, affinity to proteins, reactivity, toxicity, metabolic stability and many others.

#### **S5.2.2 Prediction of toxicity**

Toxicity risk alerts are an indication that the drawn structure may be harmful concerning the risk category specified. However, risk alerts are by no means meant to be a fully reliable toxicity prediction, nor should be concluded from the absence of risk alerts that a particular substance is completely free of any toxic effect. The prediction process relies on a precomputed set of structural fragments that give rise to toxicity alerts in case they are encountered in the structure currently

drawn. These fragment lists were created by rigorously shredding all compounds of the Registry of Toxic Effects of Chemical Substances (RTECS) database known to be active in a certain toxicity class (e.g., mutagenicity). Six types of toxicity data are included: (1) primary irritation; (2) mutagenic effects; (3) reproductive effects; (4) tumorigenic effects; (5) acute toxicity; and (6) other multiple dose toxicity. Specific numeric toxicity values such as LD<sub>50</sub>, LC<sub>50</sub>, TDLo, and TCLo are noted as well as species studied and route of administration used.

#### ***S5.2.2.1 Acute rat toxicity prediction by GUSAR (on the Basis of PASS Prediction)***

*In silico* prediction of LD<sub>50</sub> values for rats with four types of administration (oral, intravenous, intraperitoneal, subcutaneous, inhalation) were calculated with the aid of GUSAR software from the Institute of Biomedical Chemistry (IBMC), Russia [S52-S54]. GUSAR (General Unrestricted Structure-Activity Relationships) software is a tool developed to create models on quantitative structure-activity relationships/quantitative structure-property relationship (QSAR/QSPR) on the basis of the appropriate training sets represented as SD file contained data about chemical structures and endpoint quantitative data on biological activities. The output is a reliable quantitative SAR/SPR (Structure Activity and Property Relationship) model. GUSAR predicts biological activities quantitatively, based on (Q)SAR models, which can also be created with the software. GUSAR has been developed according to OECD principals and includes last achievements in the field of QSAR modeling: consensus prediction, applicability domain assessment, internal and external models validation and clearly interpretations of obtaining results. The GUSAR is a prediction module of PASS (Prediction of Activity Spectra for Substances), predicting whole bioactivity spectra for compounds qualitatively, based only on 2D structural formulae (<http://www.pharmaexpert.ru/GUSAR/AcuToxPredict/>). The training sets were created on the basis of data from SYMYX MDL Toxicity Database. They include the information about ~10000 chemical structures with data on acute rat's toxicity represented on the LD<sub>50</sub> values (log<sub>10</sub> (mmol/kg)) [S55]. The core of GUSAR consists of a unique algorithm of self-consistent regression allows to select the best set of MNA (Multilevel Neighborhoods of Atoms), biologically-based descriptors calculated on the basis of PASS predictions and QNA (Quantitative Neighborhoods of Atoms) descriptors for a robust and reliable QSAR model. Curated chemical gene interactions data in the training sets were retrieved from the Comparative Toxicogenomics Database (CTD), Mount Desert Island Biological Laboratory, Salisbury Cove, Maine. <http://ctdbase.org/> [July, 2012]. Prediction of toxicity of the studied compounds is facilitated with the calculation of the LD<sub>50</sub> values. LD<sub>50</sub> value is one of important characteristics of acute toxicity that corresponds to the dose causing 50% mortality (median lethal dose) within 24 hours of administration. Acute oral, dermal and inhalation rodent toxicity are important parameters for general toxicological risk assessments,

whereas oral, intraperitoneal and intravenous acute rodent toxicity are important in drug design. It should be stressed out that computational toxicity estimations are not only faster than the determination of toxic doses in animals, but can also help to reduce the amount of animal experiments. The model of choice to predict possible toxicity of the studied compounds is the rat acute toxicity.

Rat acute toxicity predicted by GUSAR is based on the combination of QNA (Quantitative Neighborhoods of Atoms) descriptors [S52], PASS (Prediction of Activity Spectra for Substances) predicted biological activity profiles [S53-S57], and self-consistent regression [S54]. QNA descriptors are calculated based on the connectivity matrix (C), standard values of ionization potential (IP) and electron affinity (EA) of atoms in a molecule.

Toxic doses are often given as LD<sub>50</sub> values in mg/kg body weight. The LD<sub>50</sub> is the median lethal dose meaning the dose at which 50% of test subjects die upon exposure to a compound [S58]. Using acceptable toxicity scales, the chemicals are assigned to various groups. One of the most common scales used is the Gosselin, Smith and Hodge scale using the following thresholds: class 1 (LD<sub>50</sub> ≤ 5 mg/kg) is the highest toxicity category (extremely or super toxic), class 2 (extremely toxic) includes chemicals with 5 < LD<sub>50</sub> ≤ 50 mg/kg, class 3 (very toxic) includes chemicals with 50 < LD<sub>50</sub> ≤ 500 mg/kg, class 4 (moderately toxic) includes chemicals with 500 < LD<sub>50</sub> ≤ 5.000 mg/kg, class 5 (slightly toxic) includes chemicals with 5.000 < LD<sub>50</sub> ≤ 15.000 mg/kg, and practically non-toxic with LD<sub>50</sub> > 15.000 mg/kg (Canadian Center for Occupational Health and Safety. What is an LD50 and LC50. [http://www.ccohs.ca/oshanswers/chemicals/LD50.html#\\_1\\_6](http://www.ccohs.ca/oshanswers/chemicals/LD50.html#_1_6)).

#### **S5.2.2.2 Substrate/Metabolite specificity Prediction (SMP)**

SMP is a web-service for *in silico* prediction substrate/metabolite specificity. Prediction of interaction with 18 cytochrome P450 and UGT isoforms: CYP1A2, CYP2C9, CYP2C19, CYP2D6, CYP3A4, UGT1A10, UGT1A1, UGT2B7, UGT1A7, UGT2B15, UGT1A8, UGT1A4, UGT2B17, UGT2B10, UGT1A3, UGT1A9, UGT1A6, UGT2B4. Prediction is based on PASS (Prediction of Activity Spectra for Substances) technology (<http://www.way2drug.com/PASSonline>) and MNA descriptors.

#### **S5.2.2.3 Sites of metabolism prediction (SOMP)**

The sites of metabolism prediction (SOMP) [S59] is an *in silico* tool for the prediction of SOMs for drug-like compounds for (five major human) cytochrome P450s: CYP1A2, CYP2C9, CYP2C19, CYP2D6 and CYP3A4. Also in the training set, the sites of glucoronidation catalyzed by UGT were included. It is based on PASS technology and Labelled Multilevel Neighborhoods of Atoms (LMNA) descriptors. A set of all possible structures with one labeled atom (SoLAs) with the

appropriate LMNA descriptors is generated for a new compound under the prediction of sites of metabolism (SOMs). The results of prediction of SOMs for new compounds are created on the basis of the prediction results of all SoLAs generated for a compound. Each SoLA relates to one appropriate SOM. For every SoLA the following values calculate the probability values Pt and Pf (Pt is the probability that labeled atom in the SoLA is the SOM of the appropriate enzyme and Pf is the probability that the labeled atom in SoLA is not the SOM of the appropriate enzyme). The atoms in compounds are arranged according to  $\Delta P$  (Pt–Pf) values. The Invariant Accuracy of Prediction (IAP) criterion, similar to AUC (the area under the receiver operating characteristic (ROC) curve), was used to estimate the accuracy of the created method. Mathematically, IAP values equal the probability that the  $\Delta P$  estimation has a higher value for a randomly selected positive example (SoLAs in which labeled atom is a SOM,  $\Delta P+$ ) than for a randomly selected negative example (SoLAs in which labeled atom is not a SOM,  $\Delta P-$ ):

$$\text{IAP} = \text{Probability} (\Delta P+ > \Delta P-).$$

#### **S5.2.2.4 ROSC–Pred: Rodent Organ–Specific Carcinogenicity Prediction**

ROSC–Pred is an *in silico* predictive tool for rodent organ–specific carcinogenicity prediction on the basis of structural formula of compounds [S60]. Prediction is based on PASS (Prediction of Activity Spectra for Substances) technology and training sets created on the basis of data from Carcinogenic Potency Database (CPDB). The CPDB data are available on EPA Distributed Structure-Searchable Toxicity (DSSTox) Public Database Network ([ftp://ftp.epa.gov/dsstoxftp/DSSTox\\_Archive\\_20150930/CPDBAS\\_DownloadFiles/](ftp://ftp.epa.gov/dsstoxftp/DSSTox_Archive_20150930/CPDBAS_DownloadFiles/)). For input data on the structure of test compound it may be used SMILES and MOL files or even the integrated Marvin Sketch Javascript applet.

#### **S5.2.2.5 Quantitative prediction of anti-target interaction profiles for chemical compounds by GUSAR software.**

GUSAR software was developed to create QSAR/QSPR models on the basis of the appropriate training sets represented as SD file contained data about chemical structures and endpoint in quantitative terms. The QSAR models for the sets of thirty–two end–points ( $IC_{50}$ ,  $K_i$  and  $K_{act}$ ) include the data about 4000 chemical compounds interacting with 18 anti-target proteins (13 receptors, 2 enzymes and 3 transporters) [S61].

### **CHARACTERISTICS OF QSAR MODELS FOR ANTITARGETS SETS**

| Activity Name | End-point | Number of compounds<br>Training set / | Number of<br>models | R2<br>training<br>set | Q2<br>training<br>set | R2<br>test<br>set | Coverage,% |
|---------------|-----------|---------------------------------------|---------------------|-----------------------|-----------------------|-------------------|------------|
|---------------|-----------|---------------------------------------|---------------------|-----------------------|-----------------------|-------------------|------------|

|                                                              |                  | Test set   |    |      |      |      |       |
|--------------------------------------------------------------|------------------|------------|----|------|------|------|-------|
| 5-hydroxytryptamine 1B receptor antagonist                   | IC <sub>50</sub> | 297 / 74   | 8  | 0.83 | 0.79 | 0.67 | 100.0 |
| 5-hydroxytryptamine 1B receptor antagonist                   | Ki               | 266 / 66   | 7  | 0.73 | 0.66 | 0.72 | 100.0 |
| 5-hydroxytryptamine 2A receptor antagonist                   | IC <sub>50</sub> | 555 / 143  | 13 | 0.83 | 0.78 | 0.71 | 98.6  |
| 5-hydroxytryptamine 2A receptor antagonist                   | Ki               | 1010 / 252 | 13 | 0.72 | 0.65 | 0.59 | 99.6  |
| 5-hydroxytryptamine 2C receptor antagonist                   | IC <sub>50</sub> | 128 / 32   | 18 | 0.77 | 0.73 | 0.58 | 100.0 |
| 5-hydroxytryptamine 2C receptor antagonist                   | Ki               | 487 / 121  | 14 | 0.74 | 0.66 | 0.62 | 99.2  |
| alpha 1a adrenergic receptor antagonist                      | IC <sub>50</sub> | 438 / 111  | 16 | 0.79 | 0.73 | 0.72 | 98.2  |
| alpha 1a adrenergic receptor antagonist                      | Ki               | 1366 / 344 | 5  | 0.83 | 0.79 | 0.80 | 97.0  |
| alpha 1b adrenergic receptor antagonist                      | Ki               | 410 / 102  | 17 | 0.73 | 0.66 | 0.63 | 100.0 |
| alpha-2A adrenergic receptor antagonist                      | IC <sub>50</sub> | 109 / 27   | 16 | 0.88 | 0.84 | 0.75 | 100.0 |
| alpha-2A adrenergic receptor antagonist                      | Ki               | 525 / 131  | 17 | 0.84 | 0.79 | 0.77 | 99.2  |
| amine oxidase [flavin-containing] A inhibitor                | IC <sub>50</sub> | 286 / 71   | 9  | 0.80 | 0.75 | 0.72 | 100.0 |
| amine oxidase [flavin-containing] A inhibitor                | Ki               | 60 / 15    | 5  | 0.73 | 0.62 | 0.64 | 100.0 |
| androgen receptor antagonist                                 | IC <sub>50</sub> | 116 / 29   | 8  | 0.79 | 0.73 | 0.67 | 100.0 |
| carbonic anhydrase II activator                              | K <sub>act</sub> | 104 / 26   | 20 | 0.92 | 0.90 | 0.91 | 100.0 |
| carbonic anhydrase I activator                               | K <sub>act</sub> | 108 / 27   | 12 | 0.98 | 0.97 | 0.93 | 100.0 |
| carbonic anhydrase I inhibitor                               | Ki               | 935 / 234  | 11 | 0.91 | 0.86 | 0.86 | 98.3  |
| carbonic anhydrase II inhibitor                              | IC <sub>50</sub> | 866 / 217  | 7  | 0.87 | 0.79 | 0.76 | 98.6  |
| d(1A) dopamine receptor antagonist                           | IC <sub>50</sub> | 126 / 31   | 11 | 0.76 | 0.72 | 0.80 | 100.0 |
| d(1A) dopamine receptor antagonist                           | Ki               | 291 / 73   | 10 | 0.72 | 0.66 | 0.57 | 100.0 |
| d3 dopamine receptor antagonist                              | Ki               | 822 / 206  | 9  | 0.73 | 0.66 | 0.62 | 98.0  |
| delta-type opioid receptor antagonist                        | Ki               | 1044 / 261 | 16 | 0.75 | 0.70 | 0.65 | 98.5  |
| estrogen receptor antagonist                                 | IC <sub>50</sub> | 402 / 100  | 4  | 0.66 | 0.61 | 0.70 | 97.0  |
| estrogen receptor antagonist                                 | Ki               | 255 / 68   | 13 | 0.76 | 0.71 | 0.70 | 100.0 |
| kappa-type opioid receptor antagonist                        | Ki               | 884 / 221  | 7  | 0.74 | 0.67 | 0.65 | 100.0 |
| mu-type opioid receptor antagonist                           | IC <sub>50</sub> | 545 / 136  | 7  | 0.67 | 0.61 | 0.70 | 97.8  |
| mu-type opioid receptor antagonist                           | Ki               | 1354 / 338 | 4  | 0.69 | 0.62 | 0.60 | 96.7  |
| sodium- and chloride-dependent GABA transporter 1 antagonist | IC <sub>50</sub> | 75 / 19    | 10 | 0.9  | 0.86 | 0.89 | 100.0 |
| sodium-dependent dopamine transporter antagonist             | IC <sub>50</sub> | 920 / 230  | 5  | 0.7  | 0.65 | 0.67 | 98.3  |
| sodium-dependent dopamine transporter antagonist             | Ki               | 655 / 164  | 7  | 0.77 | 0.69 | 0.64 | 100.0 |
| sodium-dependent serotonin transporter antagonist            | IC <sub>50</sub> | 796 / 199  | 7  | 0.8  | 0.75 | 0.69 | 97.5  |

|                                                   |    |           |   |      |      |      |      |
|---------------------------------------------------|----|-----------|---|------|------|------|------|
| sodium-dependent serotonin transporter antagonist | Ki | 823 / 206 | 2 | 0.72 | 0.65 | 0.61 | 95.6 |
|---------------------------------------------------|----|-----------|---|------|------|------|------|

#### S5.2.2.6 Environmental ecotoxicity predicted by GUSAR

Quantitative prediction of ecotoxicity for chemical compounds by GUSAR software. The QSAR models were developed for the following endpoints: 96-h fathead minnow 50% lethal concentration, 48-h daphnia magna 50% lethal concentration, Tetrahymena pyriformis 50% growth inhibition concentration and Bioconcentration Factor.

#### CHARACTERISTICS OF QSAR MODELS FOR ECOTOXICITY PREDICTIONS

| Activity Name                             | N train | N test | N models | R2   | Q2   | R2 test | RMSE test | Coverage, % |
|-------------------------------------------|---------|--------|----------|------|------|---------|-----------|-------------|
| Fathead Minnow LC50 Log10(mmol/L)         | 462     | 115    | 173      | 0.83 | 0.79 | 0.83    | 0.68      | 100         |
| Bioaccumulation factor Log10(BCF)         | 478     | 120    | 196      | 0.83 | 0.80 | 0.85    | 0.56      | 100         |
| Tetrahymena pyriformis IGC50 Log10(mol/L) | 874     | 219    | 196      | 0.91 | 0.88 | 0.87    | 0.39      | 100         |
| Daphnia magna LC50 - Log10(mol/L)         | 269     | 68     | 117      | 0.82 | 0.78 | 0.65    | 0.99      | 100         |

N train - number of compounds in the training set;

N test - number of compounds in the test set;

R2 - average R2 of the models calculated for the appropriate training set;

Q2 - average Q2 of the models calculated for the appropriate training set;

Coverage - % compounds from the test set in Applicability Domain.

#### S5.2.2.7 CLC–Pred: *in silico* prediction of cytotoxicity for tumor and non-tumor cell lines

CLC–Pred (Cell Line Cytotoxicity Predictor) is an *in silico* predictive tool for the prediction of cytotoxic effect of chemical compounds in non-transformed and cancer cell lines, based on structural formula. CLC–Pred provides a prediction of the cytotoxicity of a chemical compound to assess the relevance of the substance's inclusion in experimental screening. Prediction is based on PASS (Prediction of Activity Spectra for Substances) technology (<http://www.way2drug.com/PASSonline>) and the training set created on the basis of data on cytotoxicity retrieved from ChEMBLdb (version 23) (<https://www.ebi.ac.uk/chembl/db/>). For input data on the structure of test compound it may be used SMILES, MOL file or even the integrated Marvin Javascript applet.

#### S5.2.2.8 Prediction of activity spectra

Virtual target screening was adopted in order to computationally screen one selected compound against a collection of virtual protein structures, to determine if a particular protein would be a potential target of a compound of interest. Understanding chemical-biological interactions is rather a complicated task because of the multifaceted structure-function relationships in biological

systems. Prediction of activity spectra for substances (PASS) project encompasses a computational tool being able to predict the complete biological activity profile of drug-like compounds [S62]. PASS may be used to estimate general pharmacological potential of compounds under study. Since computing is carried out based on a structural formula, the prediction may be obtained for compounds that are just designed on the computer, neither synthesized nor tested yet [S63]. Based on prediction, one may select which of the proposed structures are the most promising for a particular purpose.

The PASS estimates the probable biological activity profiles for compounds under study based on their structural formulae presented in MOL file or SDF file format. PASS prediction evaluates the general biological potential of a drug-like molecule, based on the comparison of the user's compound to a database about structure-activity relationships of more than 313,000 of drug-like biologically active compounds, using the Multilevel Neighborhoods of Atoms (MNA) structure descriptors. General list of predictable biological activities consists of over 6,400 terms including pharmacotherapeutic effects (e.g. antiarrhythmic, antihypertensive, hepatoprotectant, nootropic, etc.), biochemical mechanisms of action (e.g. cyclooxygenase inhibitor, 5 hydroxytryptamine antagonist, acetylcholine M1 receptor agonist, etc.), adverse & toxic effects (e.g. carcinogenic, mutagenic, hematotoxic, etc.), metabolism (e.g. CYP3A4 and CYP1A1 inhibition, CYP1A inducer, etc.), gene expression regulation (e.g. TH expression enhancer, TNF expression inhibitor, VEGF expression inhibition), transporter-related activities (e.g. P-glycoprotein 3 inhibitor, nucleoside transporters inhibitors) [S63].

#### **S5.2.2.9 Drug-induced gene expression profiles prediction (DIGEP-Pred)**

Drug-Induced Gene Expression Profiles Prediction (DIGEP-Pred) is a web-service for *in silico* prediction of drug-induced changes of gene expression profiles based on structural formula. Prediction of drug-induced changes of gene expression with DIGEP-Pred *in silico* tool is based on PASS technology and two training sets created on the basis of data on drug-induced changes of gene expression profiles retrieved from Comparative Toxicogenomics Database (CTD), Connectivity Map Database and L1000 Project [S64]. *In silico* prediction is based on the structural formula of the tested compound. The gene expression changes can be considered as a particular type of the biological activity of a drug. The probability "to be active" ( $P_a$ ) estimates the chance that the studied compound belongs to the sub-class of active compounds (resembles the structures of molecules, which are the most typical in a sub-set of "actives" in PASS training set). The probability "to be inactive" ( $P_i$ ) estimates the chance that the studied compound belongs to the sub-class of inactive compounds (resembles the structures of molecules, which are the most typical in a sub-set of "inactives" in PASS training set). Curated chemical gene interactions data in the training

sets were retrieved from the Comparative Toxicogenomics Database (CTD), Mount Desert Island Biological Laboratory, Salisbury Cove, Maine. <http://ctdbase.org/> [October, 2015].

## S6 References

- S1 Kontogiorgis, C.; Hadjipavlou–Litina, D. Biological evaluation of several coumarin derivatives designed as possible anti-inflammatory/antioxidant agents, *J. Enz.Inhib. Med. Chem.* **2003**, 18, 63–69.
- S2 Ruch, R.J.; Cheng, C.; Klaunig, J.E. Prevention of cytotoxicity and inhibition of intercellular communication by antioxidant catechins isolated from Chinese green tea, *Carcinogenesis* **1989**, 10, 1003–1008.
- S3 Andrews, J.M. Determination of minimum inhibitory concentrations, *J. Antimicrob. Chemotherapy*, **2001**, 48(S1) 5–16.
- S4 Irgi, E.P.; Geromichalos, G.D.; Balala, S.; Kljun, J.; Kalogiannis, S.; Papadopoulos, A.; Turel, I.; Psomas, G. Cobalt(II) complexes with the quinolone antimicrobial drug oxolinic acid: structure and biological perspectives, *RSC Adv.*, **2015**, 5, 36353–36367.
- S5 Wolfe, A.; Shimer, G.; Meehan, T. Polycyclic Aromatic Hydrocarbons Physically Intercalate into Duplex Regions of Denatured DNA. *Biochemistry* **1987**, 26, 6392–6396.
- S6 Lakowicz, J.R. Principles of Fluorescence Spectroscopy, 3rd ed. Plenum Press, New York, **2006**.
- S7 Heller, D.P.; Greenstock, C.L. Fluorescence lifetime analysis of DNA intercalated ethidium bromide and quenching by free dye. *Biophys. Chem.* **1994**, 50, 305–312.
- S8 Stella, L.; Capodilupo, A.L.; Bietti, M. A reassessment of the association between azulene and [60]fullerene. Possible pitfalls in the determination of binding constants through fluorescence spectroscopy, *Chem. Commun.*, **2008**, 4744–4746.
- S9 Wang, Y.; Zhang, H.; Zhang, G.; Tao, W.; Tang, S. Interaction of the flavonoid hesperidin with bovine serum albumin: A fluorescence quenching study, *J. Lumin.* **2007**, 126, 211–218.
- S10 Lazou, M. Tarushi, A. Gritzapis, P. Psomas, G. Transition metal complexes with a novel guanine-based (E)-2-(2-(pyridin-2-ylmethylene)hydrazinyl)quinazolin-4(3H)-one: Synthesis, characterization, interaction with DNA and albumins and antioxidant activity, *J. Inorg. Biochem.* **2020**, 206, 111019.
- S11 Drew, H.R.; Wing, R.M.; Takano, T.; Broka, C.; Tanaka, S.; Itakura, K.; Dickerson, R. E. Structure of a B-DNA dodecamer: conformation and dynamics, *Proc. Natl. Acad. Sci.* **1981**, 78, 2179–2183.
- S12 Lafitte, D.; Lamour, V.; Tsvetkov, P.O.; Makarov, A.A; Klich, M.; Deprez, P.; Moras, D.; Briand, C.; Gilli, R. DNA gyrase interaction with coumarin-based inhibitors: the role of the hydroxybenzoate isopentenyl moiety and the 5'-methyl group of the noviose, *Biochemistry* **2002**, 41, 7217–7223.

- S13 Chan P.F.; Srikanthasani, V. Huang, J.; Cui, H.; Fosberry, A.P.; Gu, M.; Hann, M.M.; Hibbs, M.; Homes, P.; Ingraham, K.; Pizzollo, J.; Shen, C.; Shillings, A.J.; Spitzfaden, C.E.; Tanner, R.; Theobald, A.J.; Stavenger, R.A.; Bax, B.D.; Gwynn, M.N. Structural basis of DNA gyrase inhibition by antibacterial QPT-1, anticancer drug etoposide and moxifloxacin. *Nat. Commun.* **2015**, 6, 10048.
- S14 Gilbert, N.C.; Gerstmeier, J.; Schexnaydre, E.E.; Borner, F.; Garscha, U.; Neau, D.B.; Werz, O.; Newcomer, M.E. Structural and mechanistic insights into 5-lipoxygenase inhibition by natural products. *Nat. Chem. Biol.* **2020**, 16, 783–790.
- S15 Ferguson, A.D.; McKeever, B.M.; Xu, S.; Wisniewski, D.; Miller, D.K.; Yamin, T.T.; Spencer, R.H.; Chu, L.; Ujjainwalla, F.; Cunningham, B.R.; Evans, J.F.; Becker, J.W. Crystal structure of inhibitor-bound human 5-lipoxygenase-activating protein. *Science* **2007**, 317, 510–512.
- S16 Berman, H.M.; Westbrook, J.; Feng, Z.; Gilliland, G.; Bhat, T.N.; Weissig, H.; Shindyalov, I.N.; Bourne, P.E. The Protein Data Bank, *Nucleic Acids Res.* **2000**, 28 235–242.
- S17 Berman, H.M.; Henrick, K.; Nakamura, H. Announcing the worldwide Protein Data Bank, *Nature Struct. Mol. Biol.* **2003**, 10, 980.
- S18 Bernstein, F.C.; Koetzle, T.F.; Williams, G.J.; Meyer, E.E.; Brice, M.D.; Rodgers, J.R.; Kennard, O.; Shimanouchi, T.; Tasumi, M. The Protein Data Bank: a computer-based archival file for macromolecular structures, *J. Mol. Biol.* **1977**, 112, 535–542.
- S19 Fosgerau, K.; Hoffmann, T. Peptide therapeutics: current status and future directions, *Drug Discov. Today* **2015**, 20, 122–128.
- S20 Shivakumar, D.; Williams, J.; Wu, Y.; Damm, W.; Shelley, J.; Sherman, W. Prediction of Absolute Solvation Free Energies using Molecular Dynamics Free Energy Perturbation and the OPLS Force Field, *J. Chem. Theory Comput.* **2010**, 6, 1509–1519.
- S21 Sastry, G.M.; Adzhigirey, M.; Day, T.; Annabhimoju, R.; Sherman, W.J. Protein and ligand preparation: parameters, protocols, and influence on virtual screening enrichments, *Comput. Aided Mol. Des.* **2013**, 27, 221–234.
- S22 Friesner, R.A.; Murphy, R.B.; Repasky, M.P.; Frye, L.L.; Greenwood, J.R.; Halgren, T.A.; Sanschagrin, P.C.; Mainz, D.T. Extra Precision Glide: Docking and Scoring Incorporating a Model of Hydrophobic Enclosure for Protein–Ligand Complexes, *J. Med. Chem.* **2006**, 49, 6177–6196.
- S23 Halgren, T.A.; Murphy, R.B.; Friesner, R.A.; Beard, H.S.; Frye, L.L.; Pollard, W.T.; Banks, J.L. Glide: A New Approach for Rapid, Accurate Docking and Scoring. 2. Enrichment Factors in Database Screening, *J. Med. Chem.* **2004**, 47, 1750–1759.
- S24 Jacobson, M.P.; Pincus, D.L.; Rapp, C.S.; Day, T.J.F.; Honig, B.; Shaw, D.E.; Friesner, R.A. A hierarchical approach to all-atom protein loop prediction, *Proteins: Structure, Function and Bioinformatics*, **2004**, 55, 351–367.

- S25 Jacobson, M.P.; Friesner, R.A.; Xiang, Z.; Honig, B. On the Role of the Crystal Environment in Determining Protein Side-chain Conformations, *J. Mol. Biol.* **2002**, 320, 597–608.
- S26 Halgren, T. New Method for Fast and Accurate Binding-site Identification and Analysis, *Chem. Biol. Drug Des.* **2007**, 69, 146–148.
- S27 Halgren, T. Identifying and Characterizing Binding Sites and Assessing Druggability, *J. Chem. Inf. Model.* **2009**, 49, 377–389.
- S28 Friesner, R.A.; Banks, J.L.; Murphy, R.B.; Halgren, T.A.; Klicic, J.J.; Mainz, D.T.; Repasky, M.P.; Knoll, E.H.; Shaw, D.E.; Shelley, M.; Perry, J.K.; Francis, P.; Shenkin, P.S. Glide: A New Approach for Rapid, Accurate Docking and Scoring. 1. Method and Assessment of Docking Accuracy, *J. Med. Chem.* **2004**, 47, 1739–1749.
- S29 Farid, R.; Day, T.; Friesner, R.A.; Pearlstein, R.A. New insights about HERG blockade obtained from protein modeling, potential energy mapping, and docking studies, *Bioorg. Med. Chem.* **2006**, 14, 3160–3173.
- S30 Sherman, W.; Day, T.; Jacobson, M.P.; Friesner, R.A.; Farid, R. Novel Procedure for Modeling Ligand/Receptor Induced Fit Effects, *J. Med. Chem.* **2006**, 49, 534–553.
- S31 Geromichalos, G.D.; Alifieris, C.E.; Geromichalou, E.G.; Trafalis, D.T. Overview on the current status on virtual high-through put screening and combinatorial chemistry approaches in multi-target anticancer drug discovery; Part II, *J. BUON* **2016**, 21, 764–779.
- S32 Bashford, D.; Case, D.A. Generalized born models of macromolecular solvation effects, *Annu. Rev. Phys. Chem.* **2000**, 51, 129–152.
- S33 Li, J.; Abel, R.; Zhu, K.; Cao, Y.; Zhao, S.; Friesner, R. A. The VSGB 2.0 model: A next generation energy model for high resolution protein structure modeling, *Proteins* **2011**, 79, 2794–2812.
- S34 DeLano, W.L. The PyMOL Molecular Graphics System 0.99, DeLano Scientific, San Carlos, CA, USA, **2006**.
- S35 Pyka, A.; Babuska, M.; Zachariasz, M. A comparison of theoretical methods of calculation of partition coefficients for selected drugs. *Acta Pol. Pharm.* **2006**, 63, 159–167.
- S36 Leung, S.S.F.; Mijalkovic, J.; Borrelli K.; Jacobson, M.P. Testing physical models of passive membrane permeation, *J. Chem. Inf. Model.* **2012**, 52, 1621–1636.
- S37 Sharma, R.; Majer, F.; Peta, V.K.; Wang, J.; Keaveney, R.; Kelleher, D.; Long, A.; Gilmer, J.F. Bile acid toxicity structure–activity relationships: Correlations between cell viability and lipophilicity in a panel of new and known bile acids using an oesophageal cell line (HET-1A), *Bioorg. Med. Chem.* **2010**, 18, 6886–6895.
- S38 Pliska, V.; Testa, B.; van De Waterbed H. Lipophilicity in Drug Action and Toxicology. New York: John Wiley & Sons Ltd. **1996**. 439 ISBN 978-3-527-29383-4.

- S39 Darmostuk, M.; Jurášek, M.; Lengyel, K.; Zelenka, J.; Rumlová, M.; Drašar, P.; Ruml, T. Conjugation of chlorins with spermine enhances phototoxicity to cancer cells in vitro, *J.Photochem. Photobiol.* **2017**, 168, 175–184.
- S40 Ertl, P.; Rohde, B.; Selzer, P. Fast calculation of molecular polar surface area as a sum of fragment-based contributions and its application to the prediction of drug transport properties, *J. Med. Chem.* **2000**, 43, 3714–3717.
- S41 Veber, D.F.; Johnson, S.R.; Cheng, H.; Smith, B.R; Ward, K.W.; Kopple, K.D. Molecular properties that influence the oral bioavailability of drug candidates, *J. Med. Chem.* **2002**, 45, 2615–2623.
- S42 Liu, X.; Testa, B.; Fahr, A. Lipophilicity and its relationship with passive drug permeation, *Pharm. Res.* **2011**, 28, 962–977.
- S43 Refsgaard, H.H.F.; Jensen, B.F.; Brockhoff, P.B.; Padkjaer, S.B.; Guldbrandt, M.; Christensen, M.S. In silico prediction of membrane permeability from calculated molecular parameters, *J. Med. Chem.* **2005**, 48, 805–811.
- S44 Li, D.; Kerns, E.H. Lipophilicity Methods in Drug-Like Properties (Second Edition), **2016**.
- S45 Lipinski, C.A.; Lombardo, F.; Dominy, B.W.; Feeney, P.J. Experimental and computational approaches to estimate solubility and permeability in drug discovery and development settings, *Adv. Drug Del. Rev.* **1997**, 23, 3–25.
- S46 Lipinski, C.A.; Lombardo, F.; Dominy, B.W.; Feeney, P.J. Experimental and computational approaches to estimate solubility and permeability in drug discovery and development settings, *Adv. Drug Deliv. Rev.* **2001**, 46, 3–26.
- S47 Leo, A.; Hansch, C.; Elkins, D. Partition coefficients and their uses, *Chem. Rev.* **1971**, 71, 525–616.
- S48 Bakht, M.A.; Yar, M.S.; Abdel-Hamid, S.G.; Qasoumi, S.I.; Samad, A. Molecular properties prediction, synthesis and antimicrobial activity of some newer oxadiazole derivatives, *Eur. J. Med. Chem.* **2010**, 45, 5862–5869.
- S49 Hagan, O.S.; Swainston, N.; Handl, J.; Kell, D.B. A 'rule of 0.5' for the metabolite-likeness of approved pharmaceutical drugs, *Metabolomics* **2015**, 11, 323–339.
- S50 Ghose, A.K.; Viswanadhan, V.N.; Wendoloski, J.J. A knowledge-based approach in designing combinatorial or medicinal chemistry libraries for drug discovery. 1. A qualitative and quantitative characterization of known drug databases, *J. Comb. Chem.* **1999**, 1, 55–68.
- S51 Srivastava, A.K.; Tewari, M.; Shukla, H.S.; Roy, B.K. In silico profiling of the potentiality of curcumin and conventional drugs for CagA oncoprotein inactivation, *Arch. Pharm.*, **2015**, 348, 548–555.

- S52 Filimonov, D.A.; Zakharov, A.V.; Lagunin, A.A.; Poroikov, V.V.; QNA-based 'Star Track' QSAR approach, *SAR QSAR, Environ. Res.* **2009**, 20, 679–709.
- S53 Poroikov, V.V.; Filimonov, D.A.; Borodina, Y.V.; Lagunin, A.A.; Kos A.J. Robustness of biological activity spectra predicting by computer program PASS for noncongeneric sets of chemical compounds, *Chem. Inf. Comput. Sci.* **2000**, 40, 1349–1355.
- S54 Lagunin, A.A.; Zakharov, A.V.; Filimonov, D.A.; Poroikov, V.V. A new approach to QSAR modelling of acute toxicity, *SAR QSAR, Environ. Res.* **2007**, 18, 285–298.
- S55 Lagunin, A.; Zakharov, A.; Filimonov, D.; Poroikov, V. QSAR Modelling of rat acute toxicity on the basis of PASS prediction, *Mol. Informatics* **2011**, 30, 241–250.
- S56 Sady, A.; Lagunin, A.; Filimonov, D.; Poroikov, V. Prediction of Biological Activity Spectra via The Internet, *SAR QSAR Env. Res.* **2003**, 14, 339–347.
- S57 Poroikov, V.V.; Filimonov, D.A.; Ihlenfeld, W.; Glorizova, T.A.; Lagunin, A.A.; Borodina, Y.V.; Stepanchikova, A.V.; Nicklaus, M. CPASS Biological Activity Spectrum Predictions in the Enhanced Open NCI Database Browser, *J. Chem. Inf. Comput. Sci.* **2003**, 43, 228–236.
- S58 Drwal, M.N.; Banerjee, P.; Dunkel, M.; Wettig, M.R.; Preissner, R. ProTox: a web server for the *in silico* prediction of rodent oral toxicity, *Nucleic Acids Res.* **2014** (Web server issue).
- S59 Rudik, A.; Dmitriev, A.; Lagunin, A.; Filimonov, D.; Poroikov, V. SOMP: web server for *in silico* prediction of sites of metabolism for drug-like compounds, *Bioinformatics* **2015**, 31, 2046–2048.
- S60 Lagunin, A.; Rudik, A.; Filimonov, D.; Druzhilovsky, D.; Poroikov, V. ROSC-Pred: web-service for rodent organ-specific carcinogenicity prediction, *Bioinformatics*, **2017**, 34, 710–712.
- S61 Zakharov, A.V.; Lagunin, A.A.; Filimonov, D.A.; Poroikov, V.V. Quantitative prediction of antitarget interaction profiles for chemical compounds, *Chem. Res. Toxicol.* **2012**, 25, 2378–2385.
- S62. Poroikov, V.; Akimov, D.; Shabelnikova, E.; Filimonov, D. Top 200 Medicines: Can New Actions be Discovered Through Computer-aided Prediction? *SAR and QSAR, Envir. Res.* **2001**, 12327–12344.
- S63 Filimonov, D.A.; Lagunin, A.A.; Glorizova, T.A.; Rudik, A.V.; Druzhilovskii, D.S.; Pogodin, P.V.; Poroikov, V.V. Prediction of the Biological Activity Spectra of Organic Compounds Using the Pass Online Web Resource, *Chem. Heterocycl. Comp.* **2014**, 50, 444–457.
- S64 Lagunin, A.; Ivanov, S.; Rudik, A.; Filimonov, D.; Poroikov, V. DIGEP-Pred: web service for *in silico* prediction of drug-induced gene expression profiles based on structural formula, *Bioinformatics* **2013**, 29, 2062–2063.

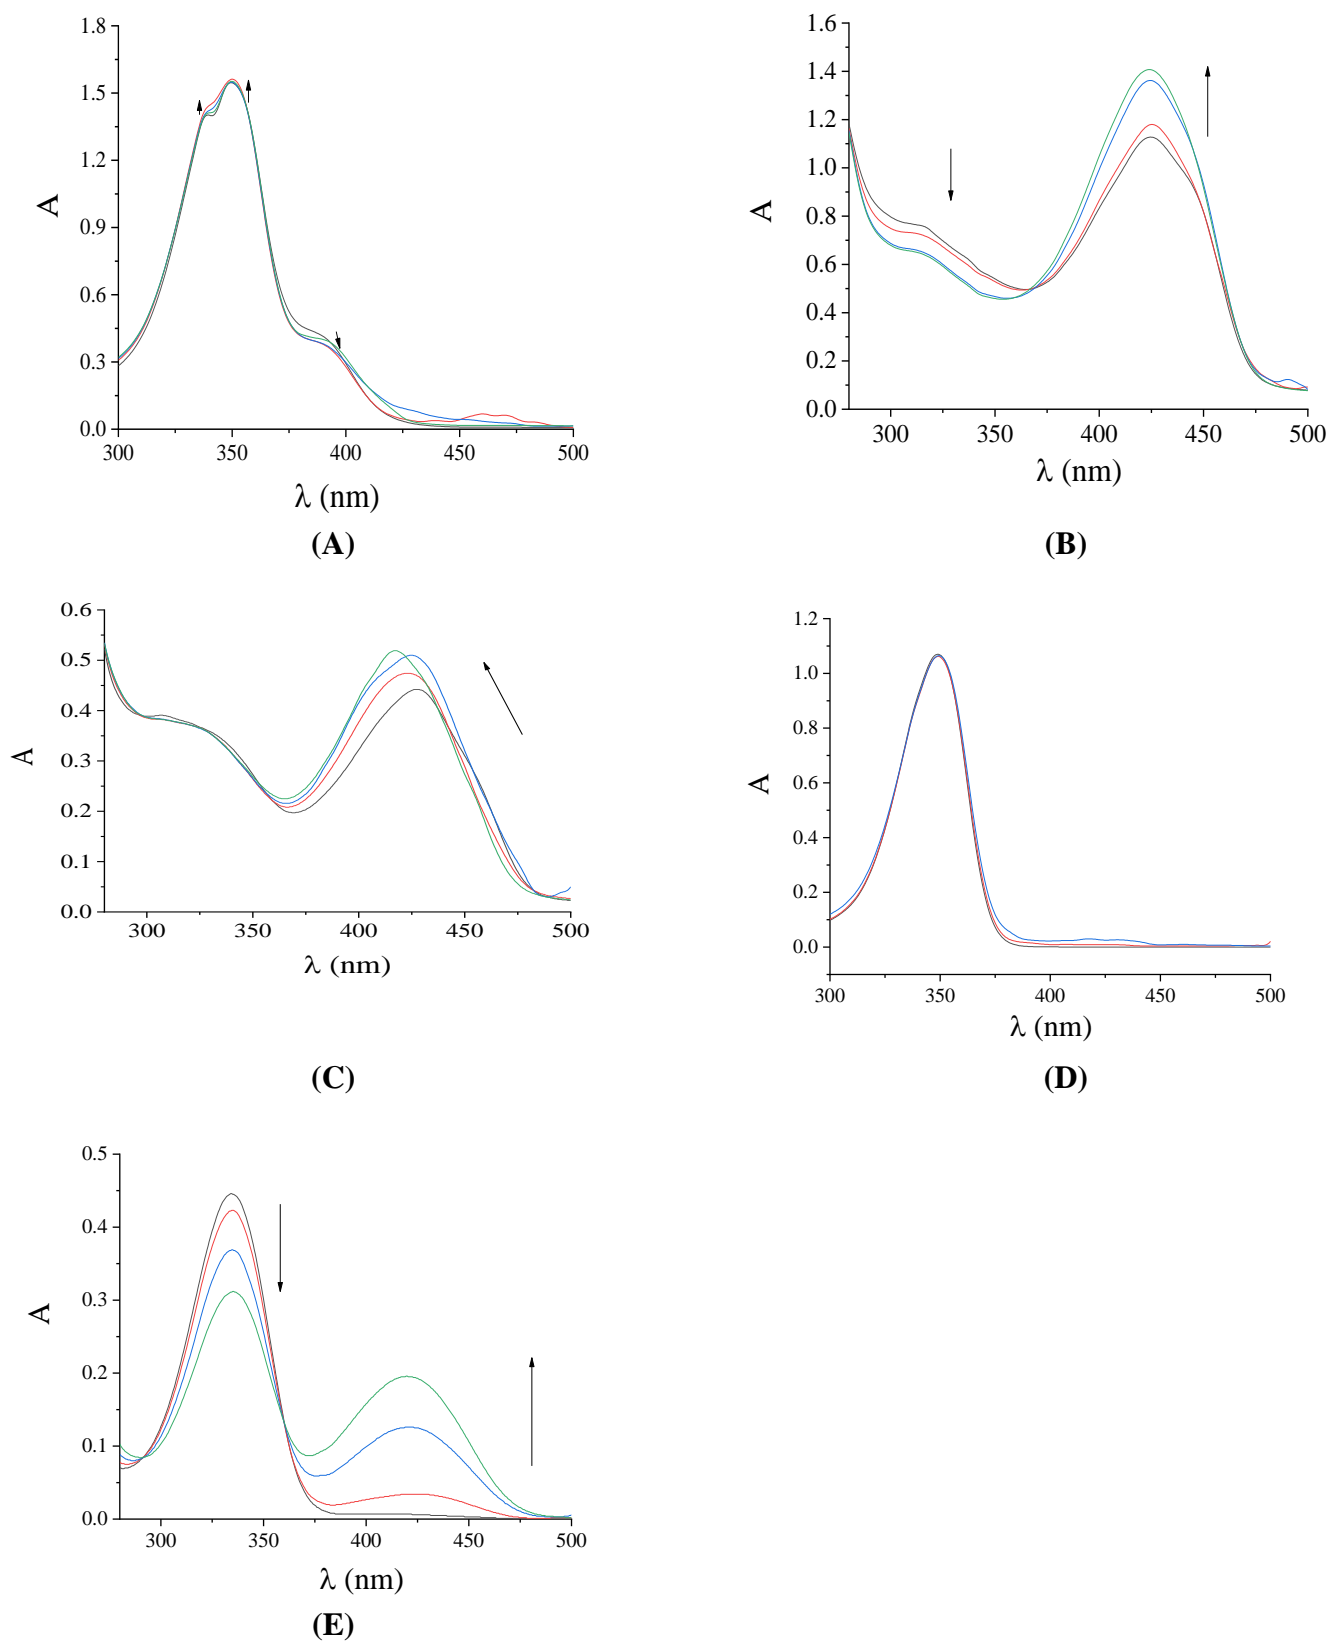

**Figure S1.** UV spectra of DMSO solution of (A) **1** ( $10^{-4}$  M), (B) **3** ( $10^{-4}$  M), (C) **4** ( $10^{-4}$  M), (D) 4-Et<sub>2</sub>N-saloH ( $10^{-5}$  M) and (E) 5-F-saloH ( $10^{-4}$  M) in the presence of increasing amounts of CT DNA. The arrows show the changes upon increasing amounts of CT DNA.

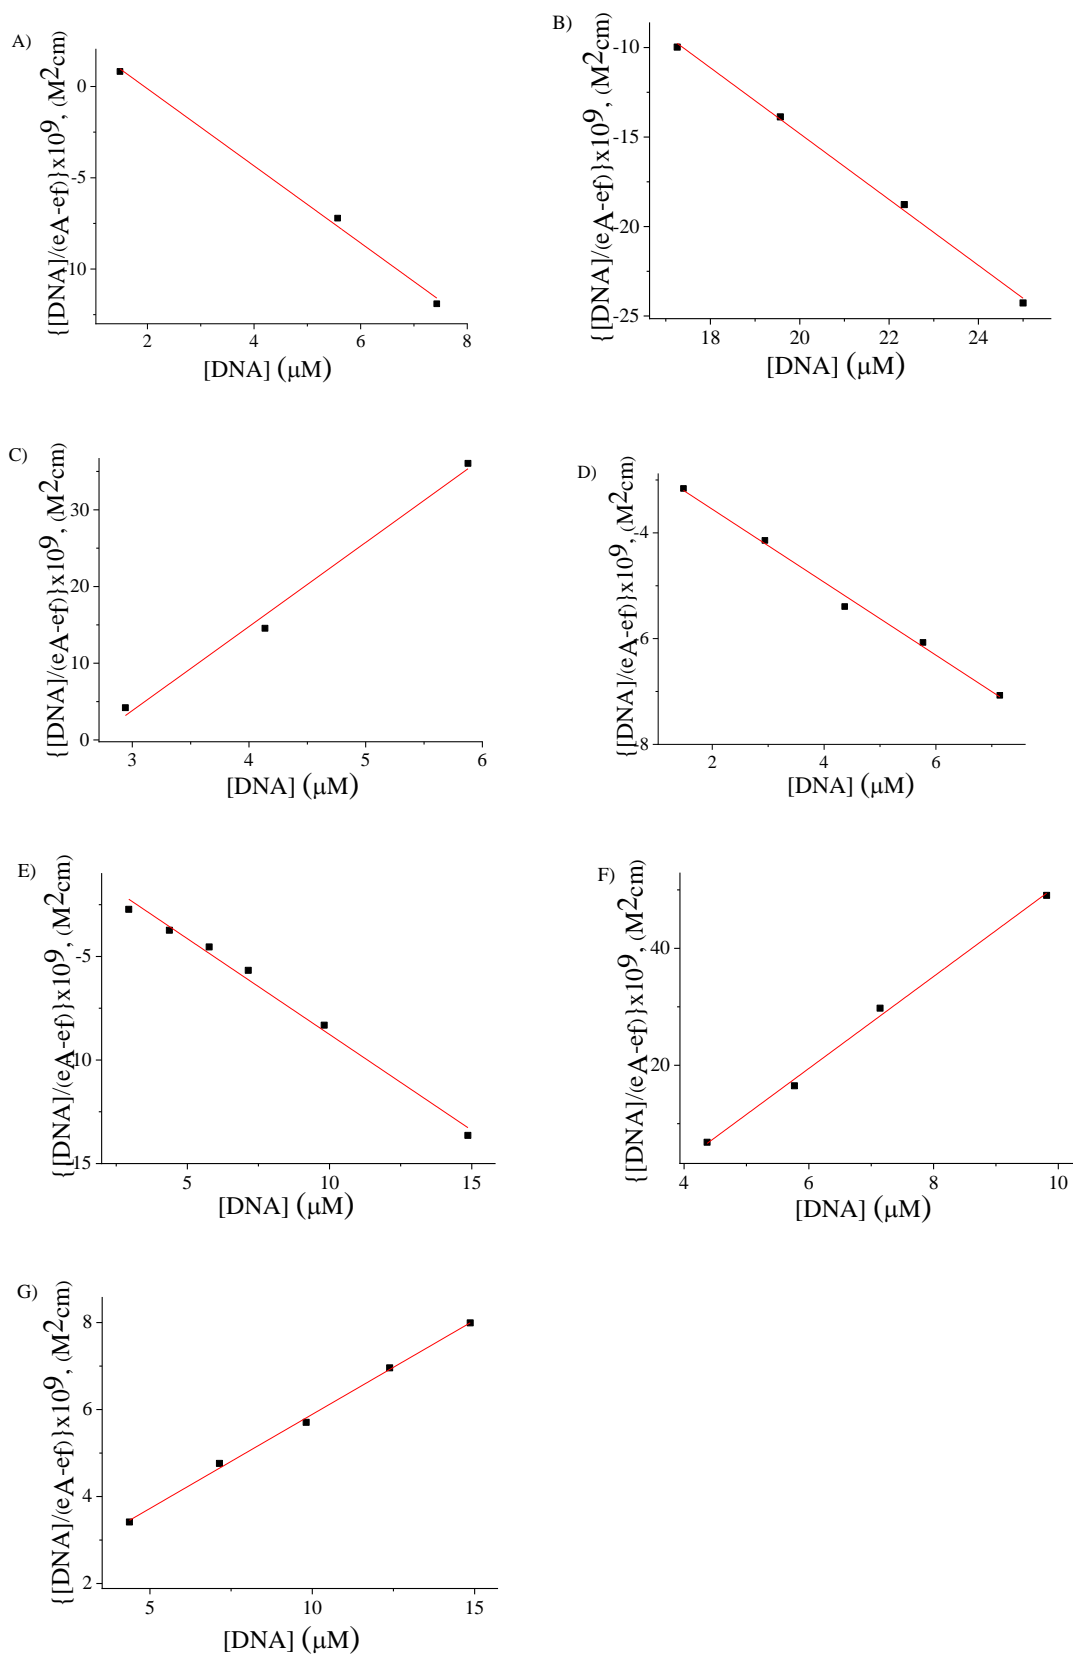

**Figure S2.** Plot of  $\frac{[DNA]}{(\epsilon_A - \epsilon_f)}$  versus  $[DNA]$  for (A)-(G) 4-Et<sub>2</sub>N-saloH, 5-F-saloH and complexes **1–5**, respectively.

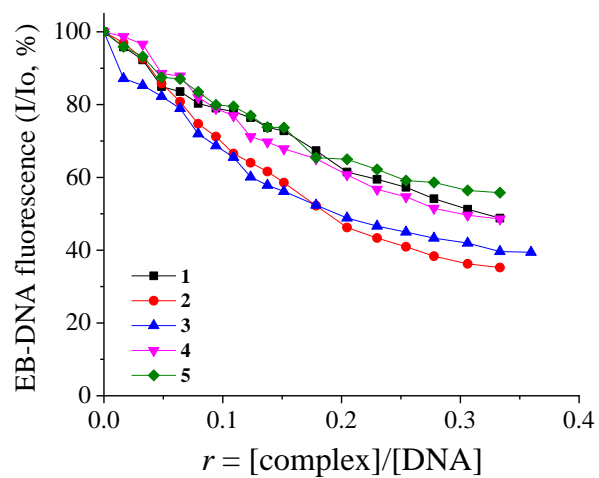

**Figure S3.** Plot of EB–DNA relative fluorescence emission intensity at  $\lambda_{\text{emission}} = 592 \text{ nm}$  (%) *versus*  $r$  ( $r = [\text{complex}]/[\text{DNA}]$ ) in the presence of complexes **1–5** (up to 48.8 % of the initial EB–DNA fluorescence emission intensity for **1**, 35.2 % for **2**, 39.4 % for **3**, 48.6 % for **4** and 55.8% for **5**).

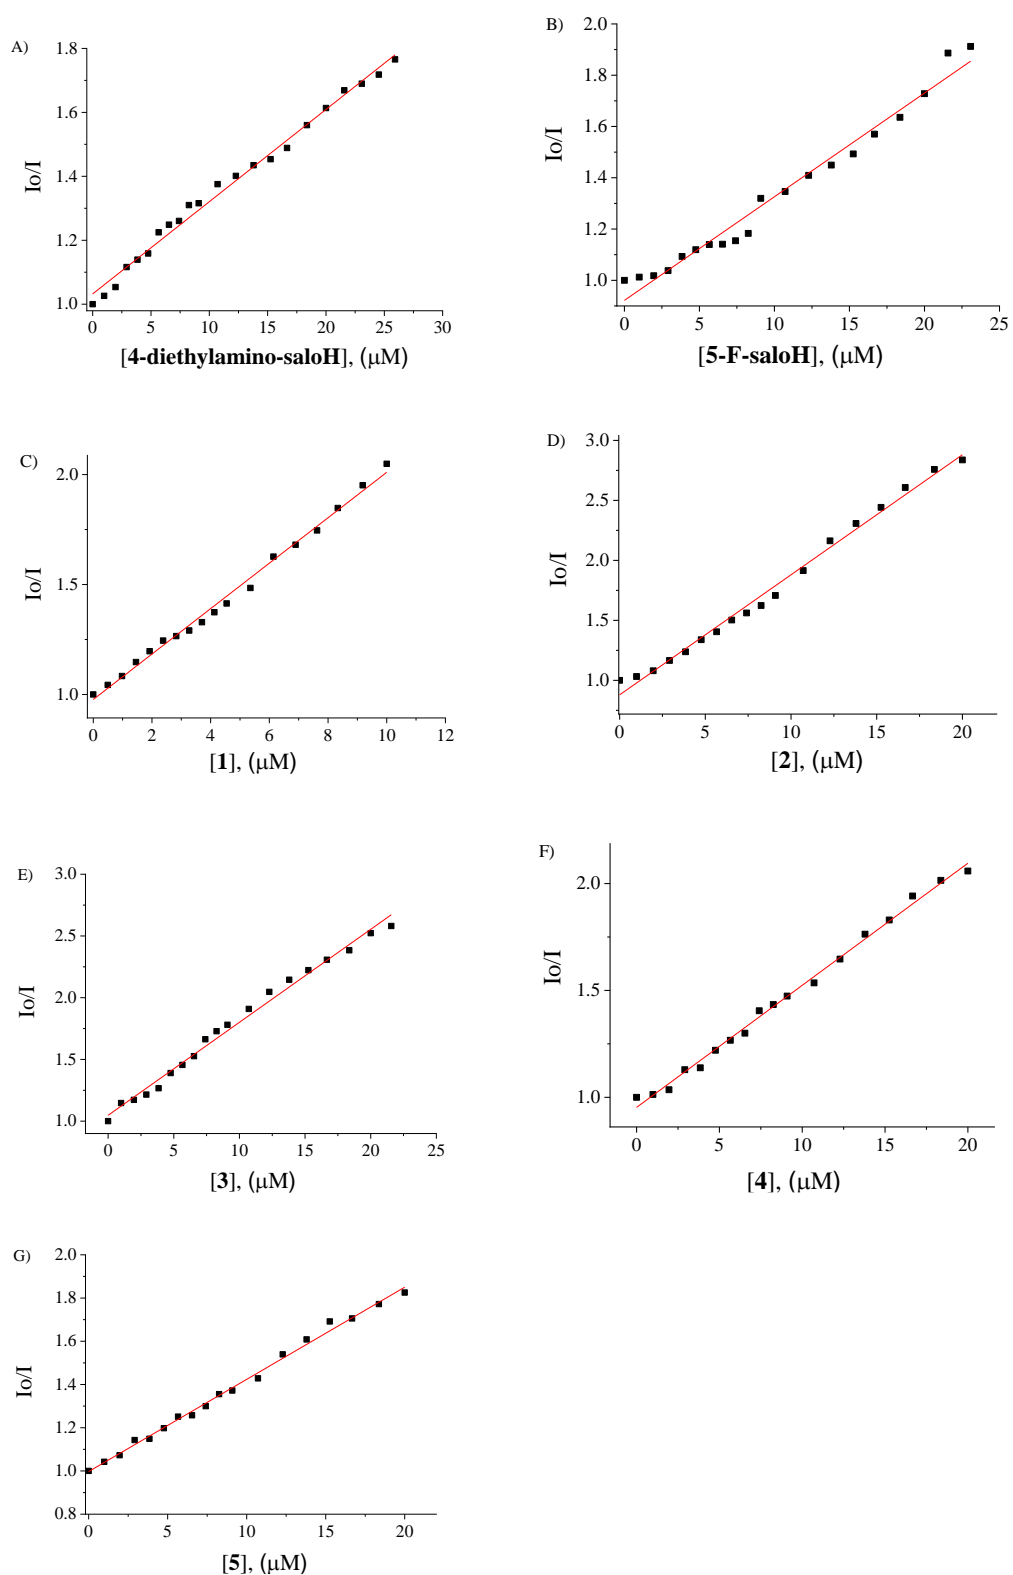

**Figure S4.** Stern–Volmer quenching plot of EB bound to CT DNA for (A)-(G) 4-Et<sub>2</sub>N-saloH, 5-F-saloH and complexes 1–5, respectively.

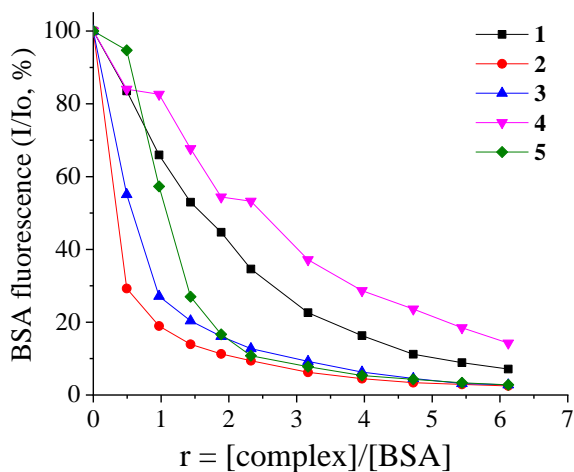

(A)

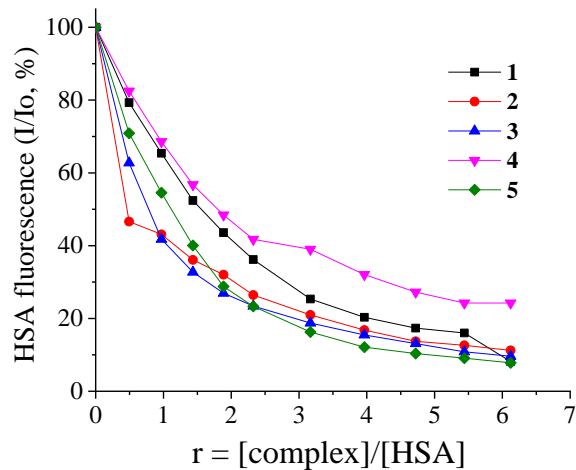

(B)

**Figure S5.** (A) Plot of % relative BSA–fluorescence emission intensity at  $\lambda_{em}=351$  nm (%) *versus*  $r$  ( $r = [\text{complex}]/[\text{BSA}]$ ) for complexes **1–5** (up to 7.2 % of the initial BSA fluorescence for **1**, 2.5 % for **2**, 2.8% for **3**, 14.3% for **4** and 2.8% for **5**) in buffer solution (150 mM NaCl and 15 mM trisodium citrate at pH 7.0). (B) Plot of % relative HSA–fluorescence emission intensity at  $\lambda_{em}=342$  nm (%) vs  $r$  ( $r = [\text{complex}]/[\text{HSA}]$ ) for complexes **1–5** (up to 8.2% of the initial HSA fluorescence for **1**, 11.2% for **2**, 9.6% for **3**, 24.3% for **4** and 7.8 % for **5**) in buffer solution (150 mM NaCl and 15 mM trisodium citrate at pH 7.0).

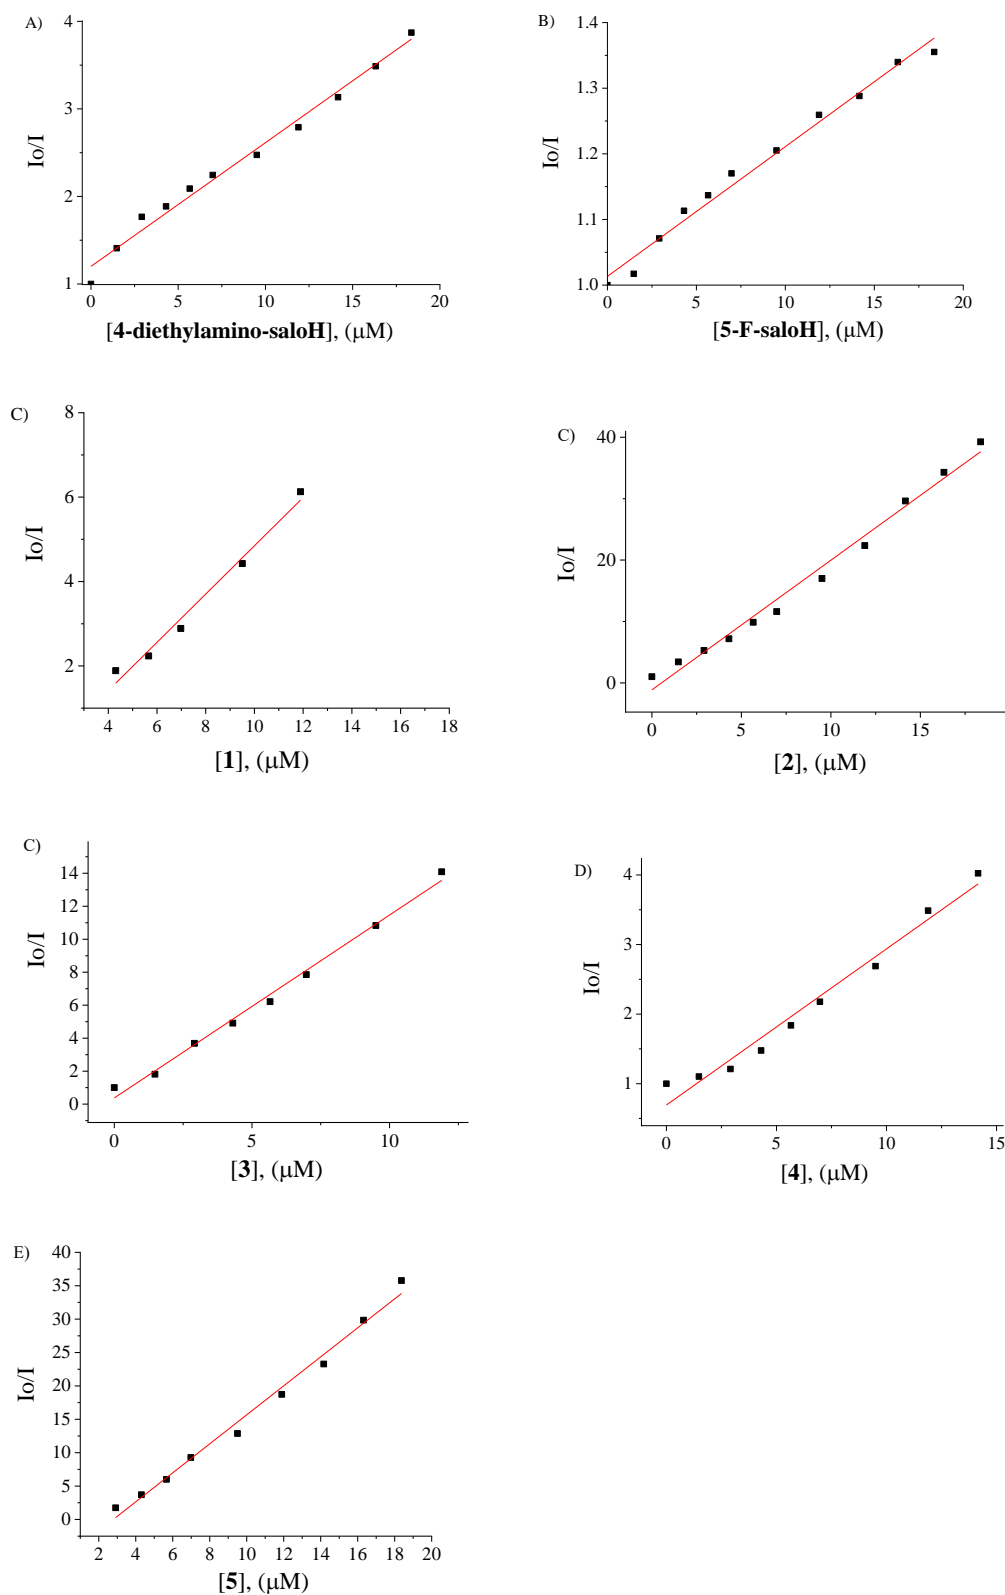

**Figure S6.** Stern–Volmer quenching plot of BSA for (A)-(G) 4-Et<sub>2</sub>N-saloH, 5-F-saloH and complexes 1–5, respectively.

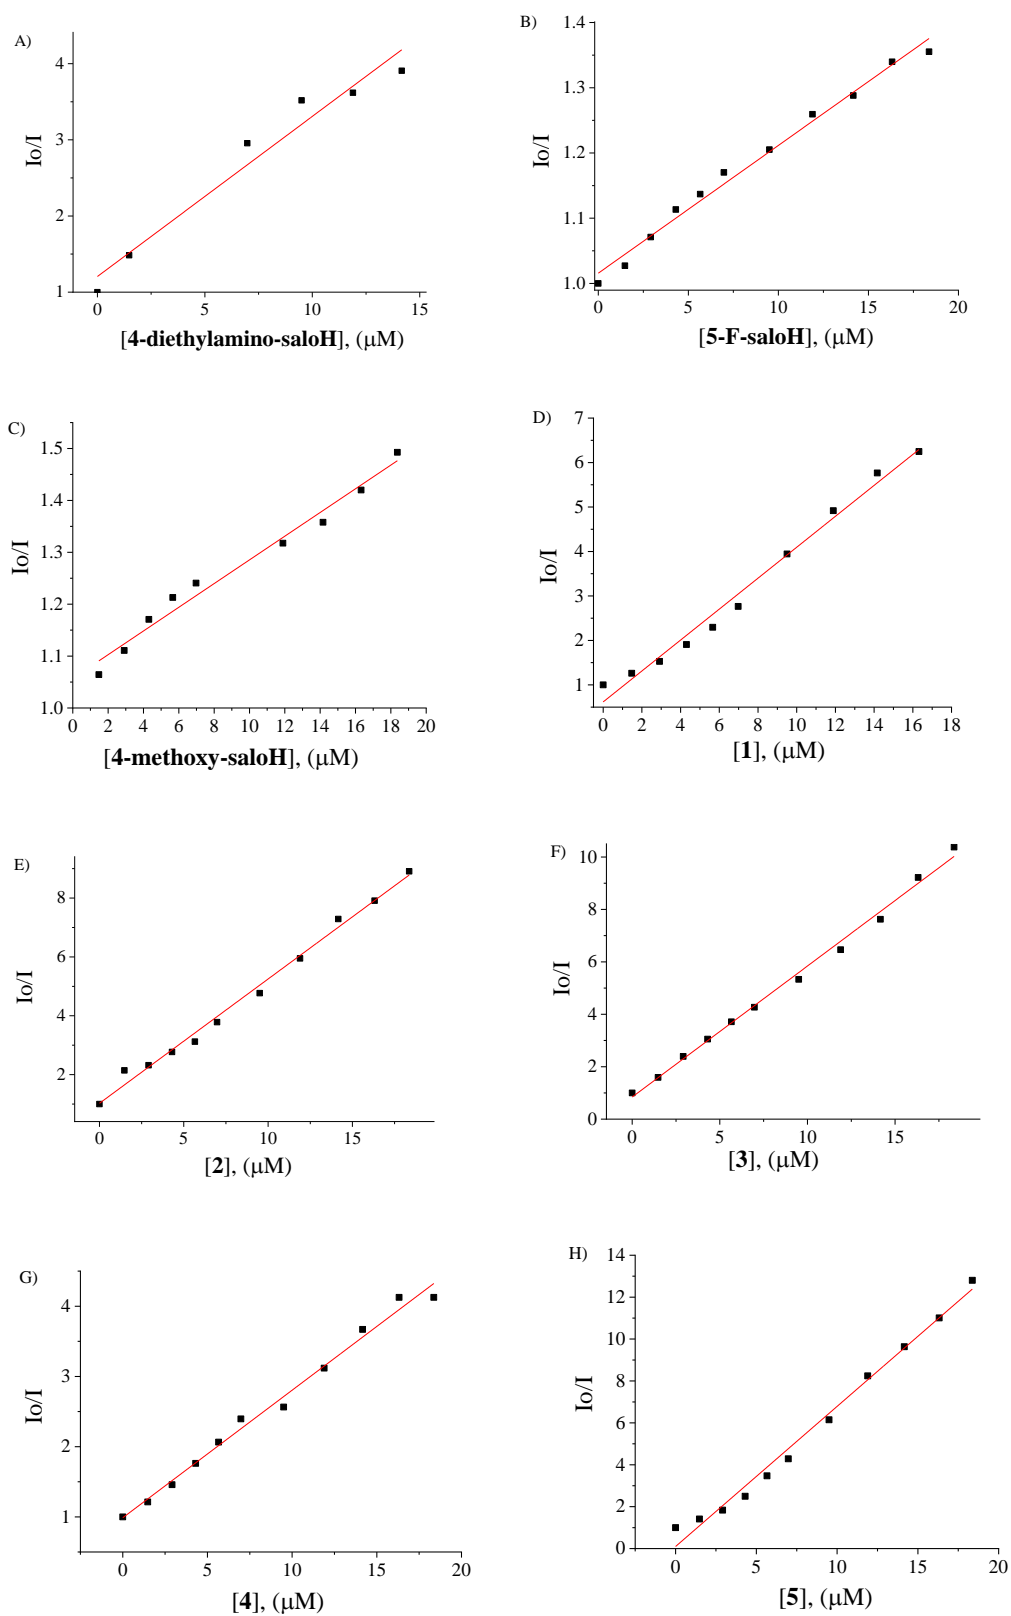

**Figure S7.** Stern–Volmer quenching plot of HSA for (A)-(H) 4-Et<sub>2</sub>N-saloH, 5-F-saloH, 4-MeO-saloH and complexes 1–5, respectively.

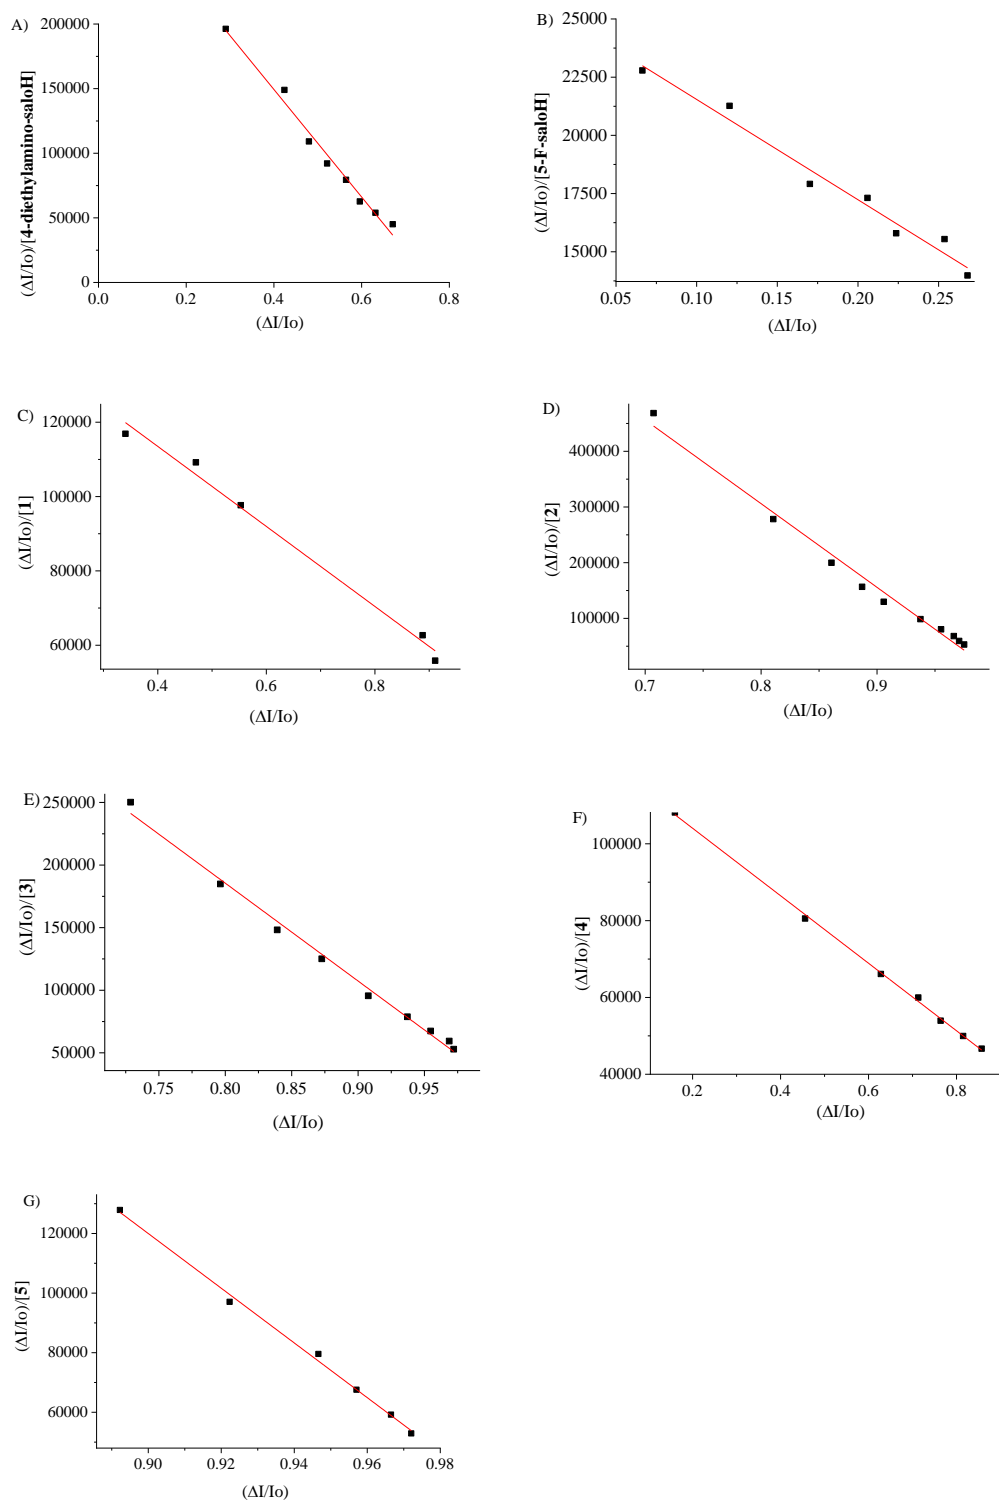

**Figure S8.** Scatchard plot of BSA for (A)-(G) 4-Et<sub>2</sub>N-saloH, 5-F-saloH and complexes 1–5, respectively.

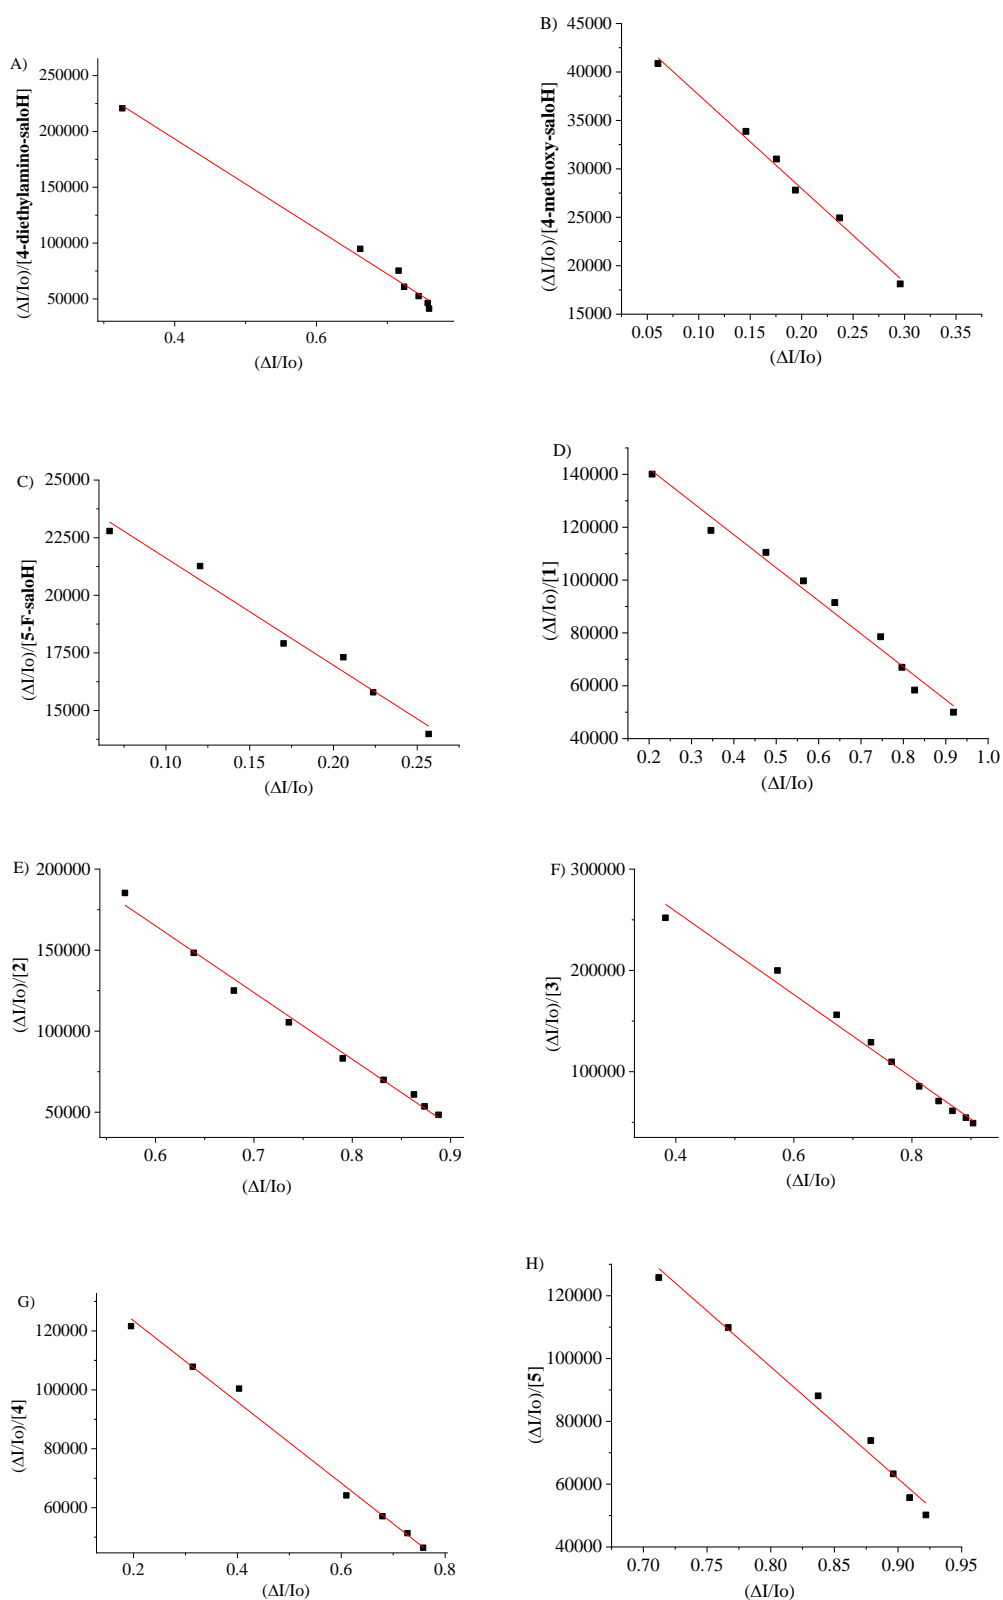

**Figure S9.** Scatchard plots of HSA for (A)-(H) 4-Et<sub>2</sub>N-saloH, 5-F-saloH, 4-MeO-saloH and complexes 1-5, respectively.

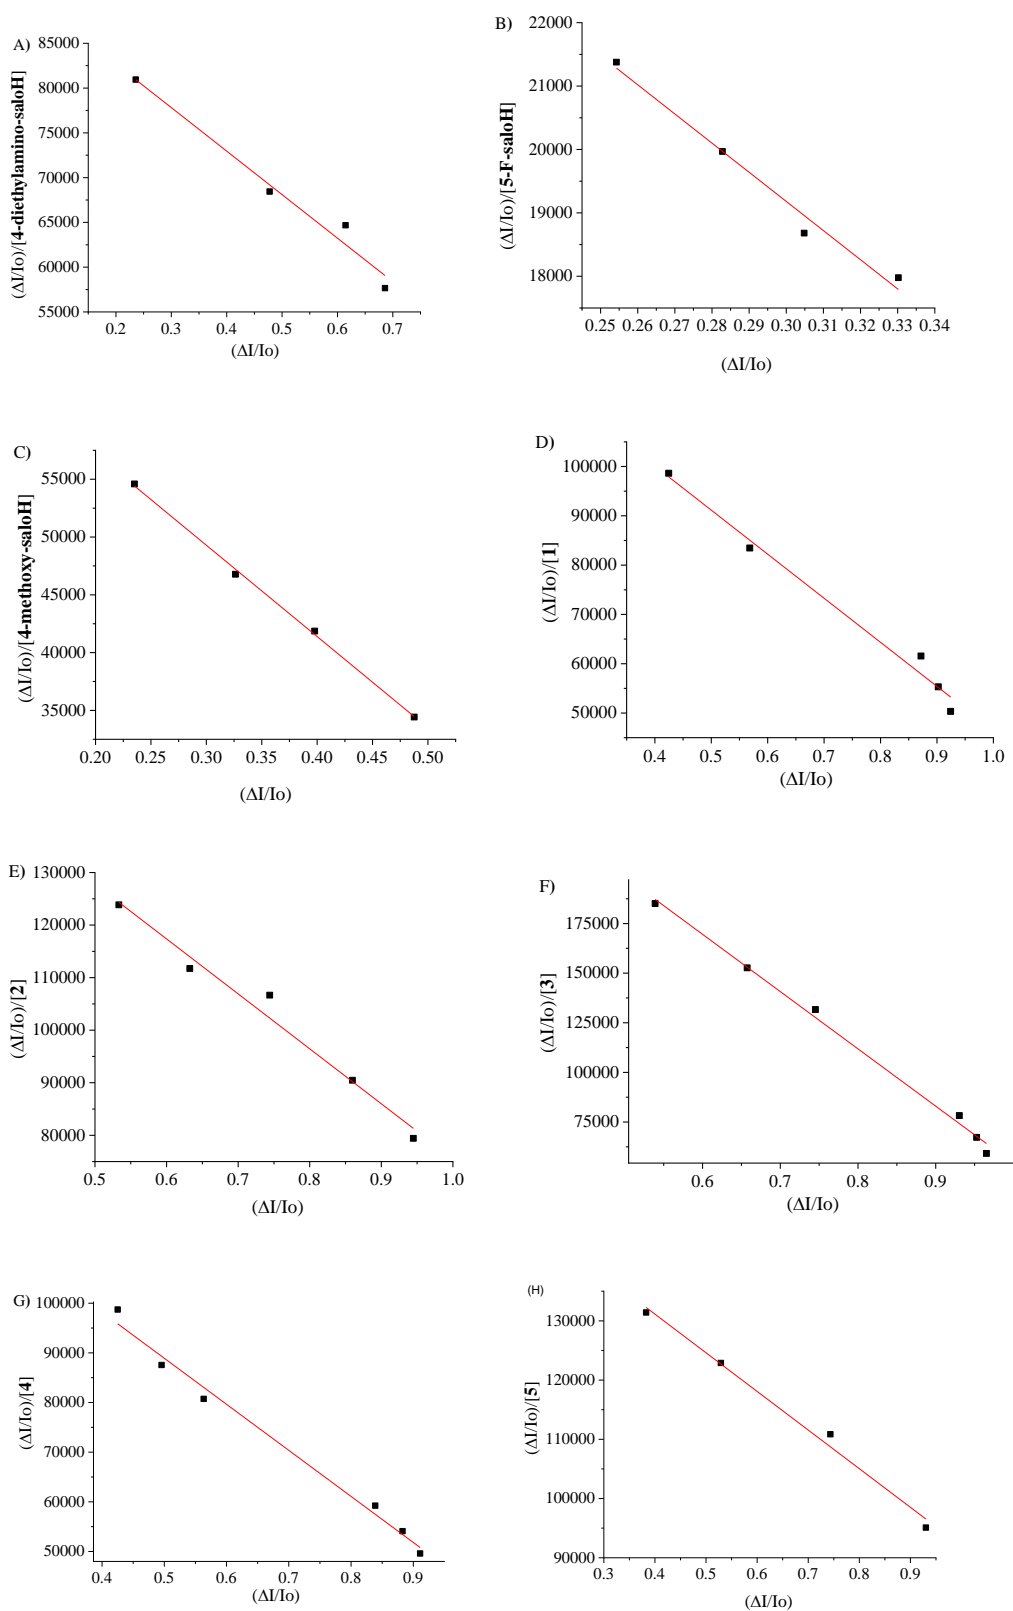

**Figure S10.** Scatchard plots of BSA-ibuprofen for (A)-(H) 4-Et<sub>2</sub>N-saloH, 5-F-saloH, 4-MeO-saloH and complexes 1-5, respectively.

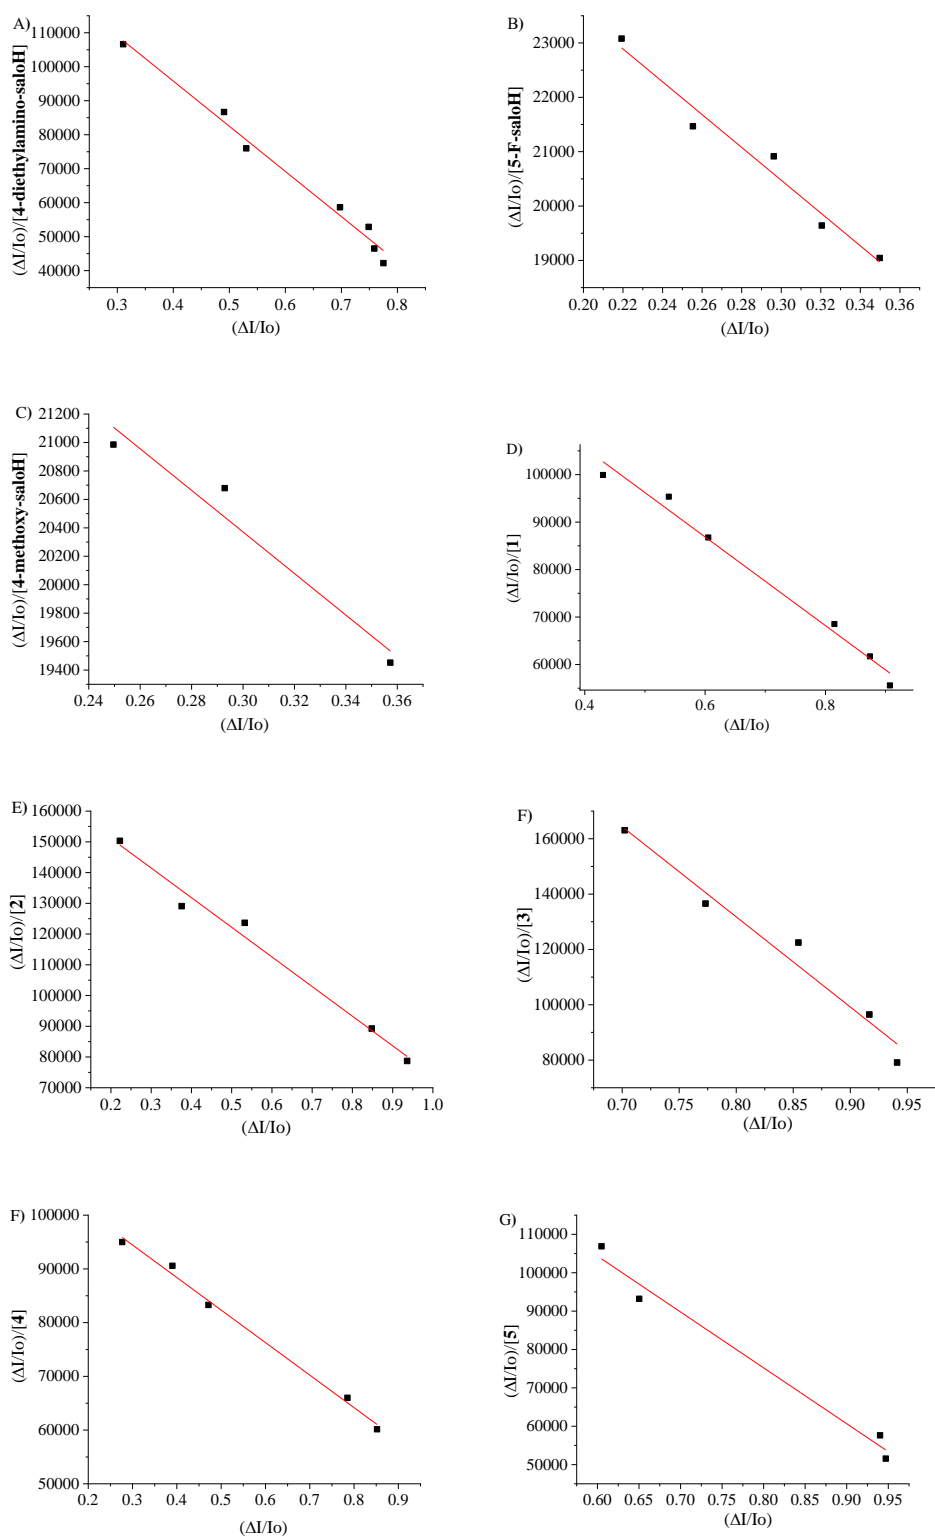

**Figure S11.** Scatchard plot of BSA-warfarin for (A)-(H) 4-Et<sub>2</sub>N-saloH, 5-F-saloH, 4-MeO-saloH and complexes 1–5, respectively.

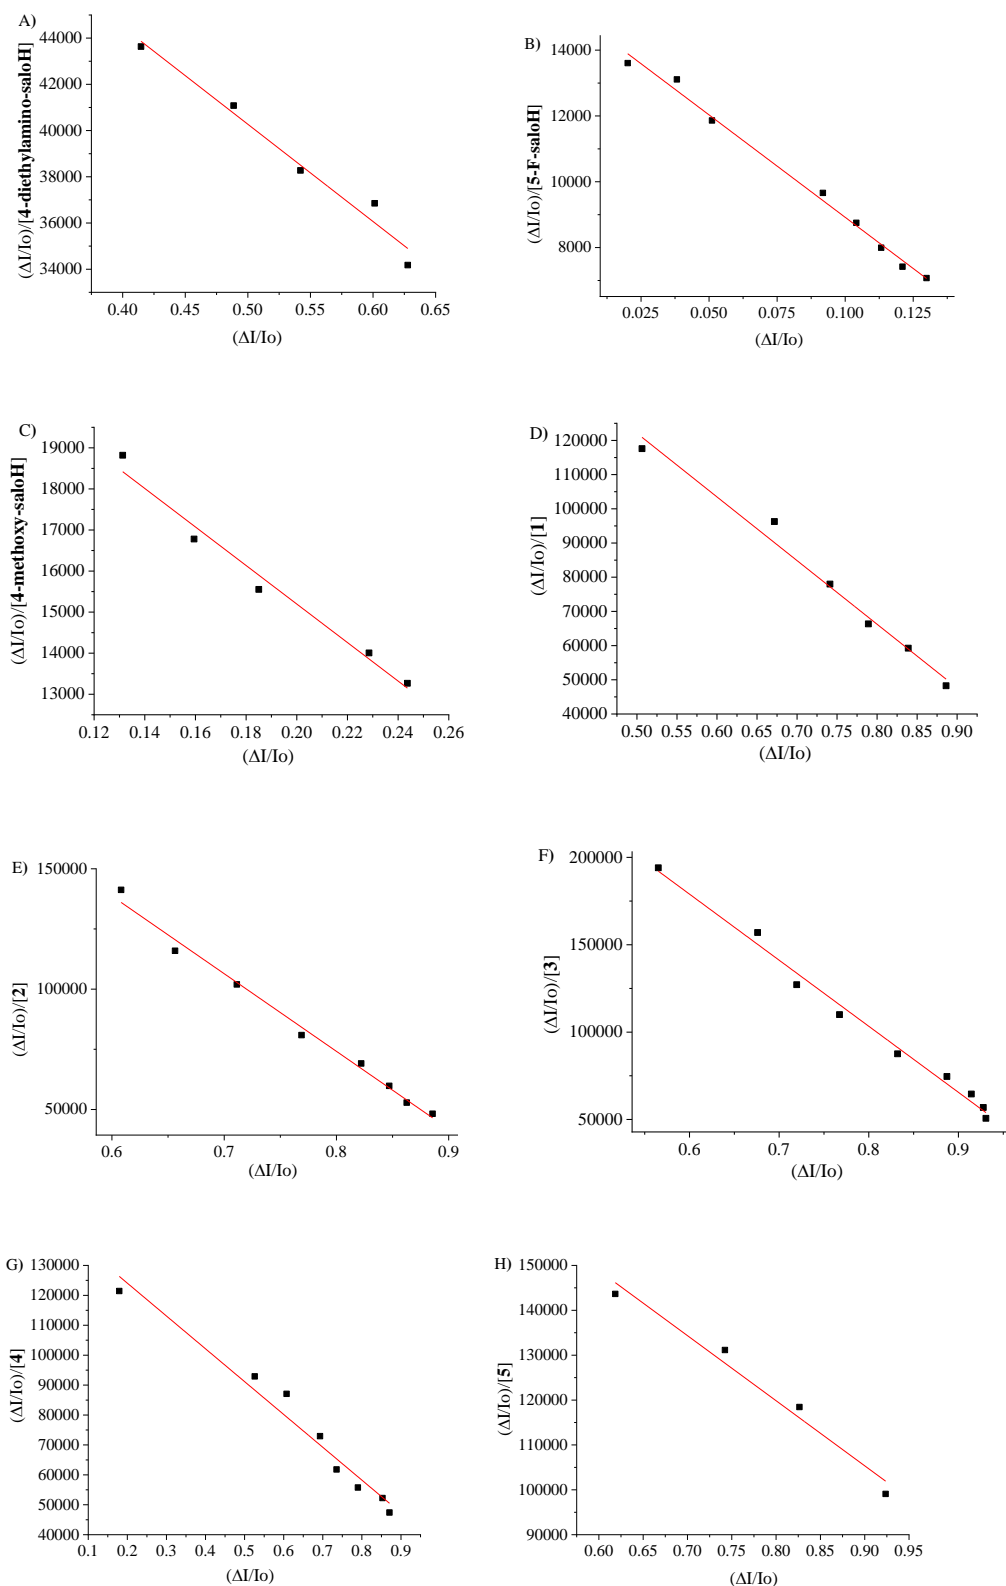

**Figure S12.** Scatchard plots of HSA–ibuprofen for (A)-(H) 4–Et<sub>2</sub>N–saloH, 5–F–saloH, 4–MeO–saloH and complexes **1–5**, respectively.

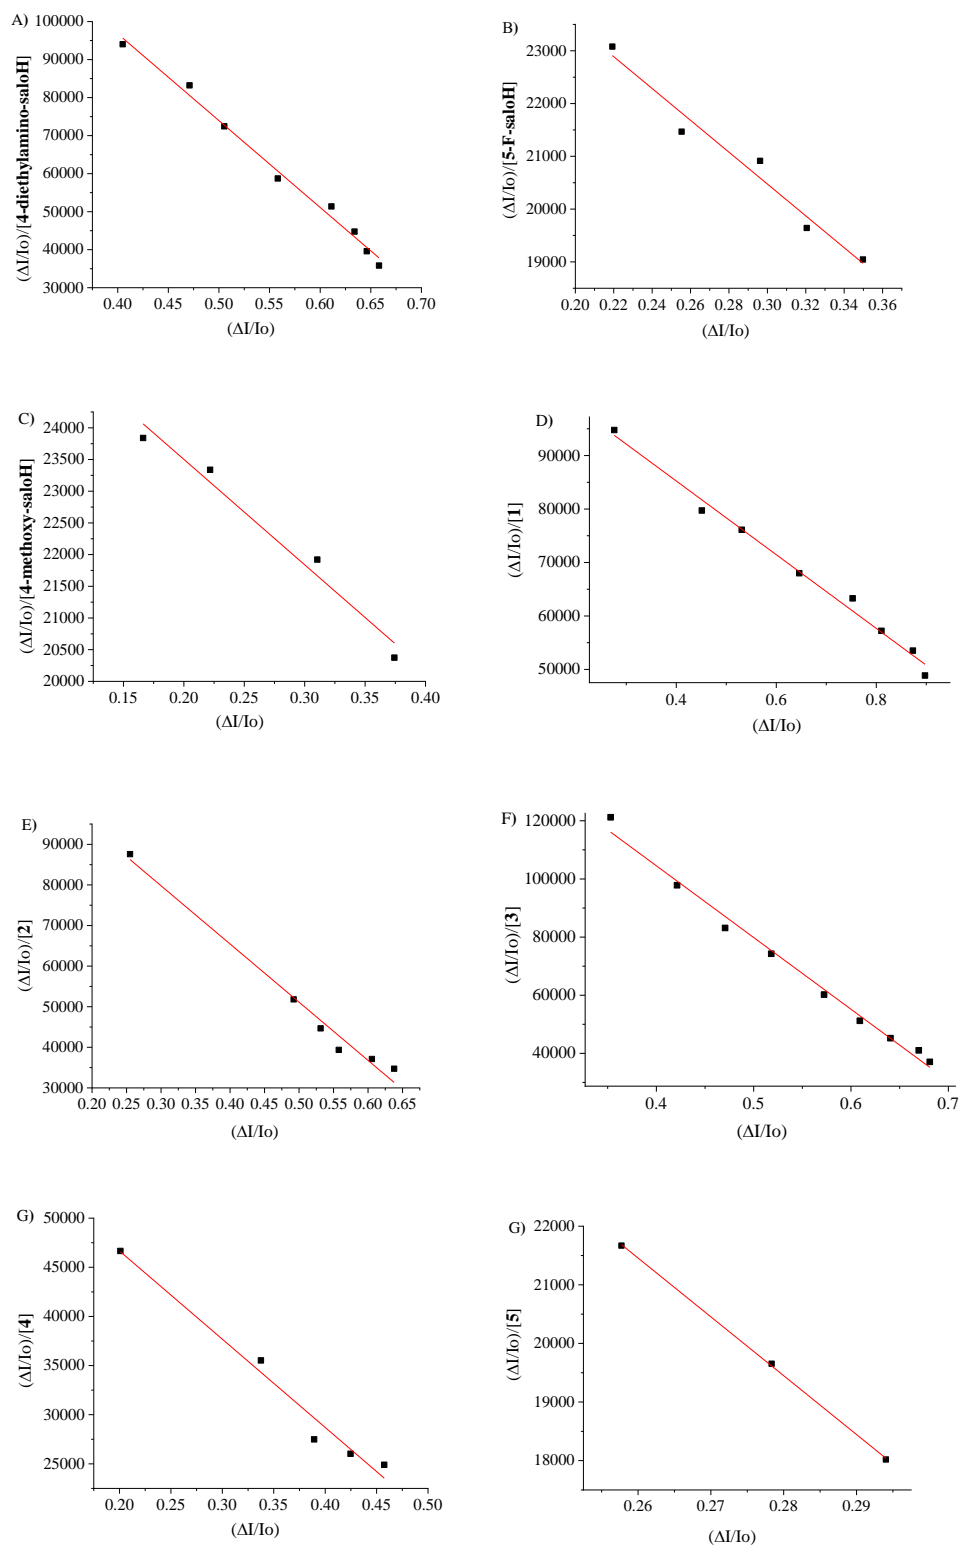

**Figure S13.** Scatchard plots of HSA-warfarin for (A)-(H) 4-Et<sub>2</sub>N-saloH, 5-F-saloH, 4-MeO-saloH and complexes 1-5, respectively.

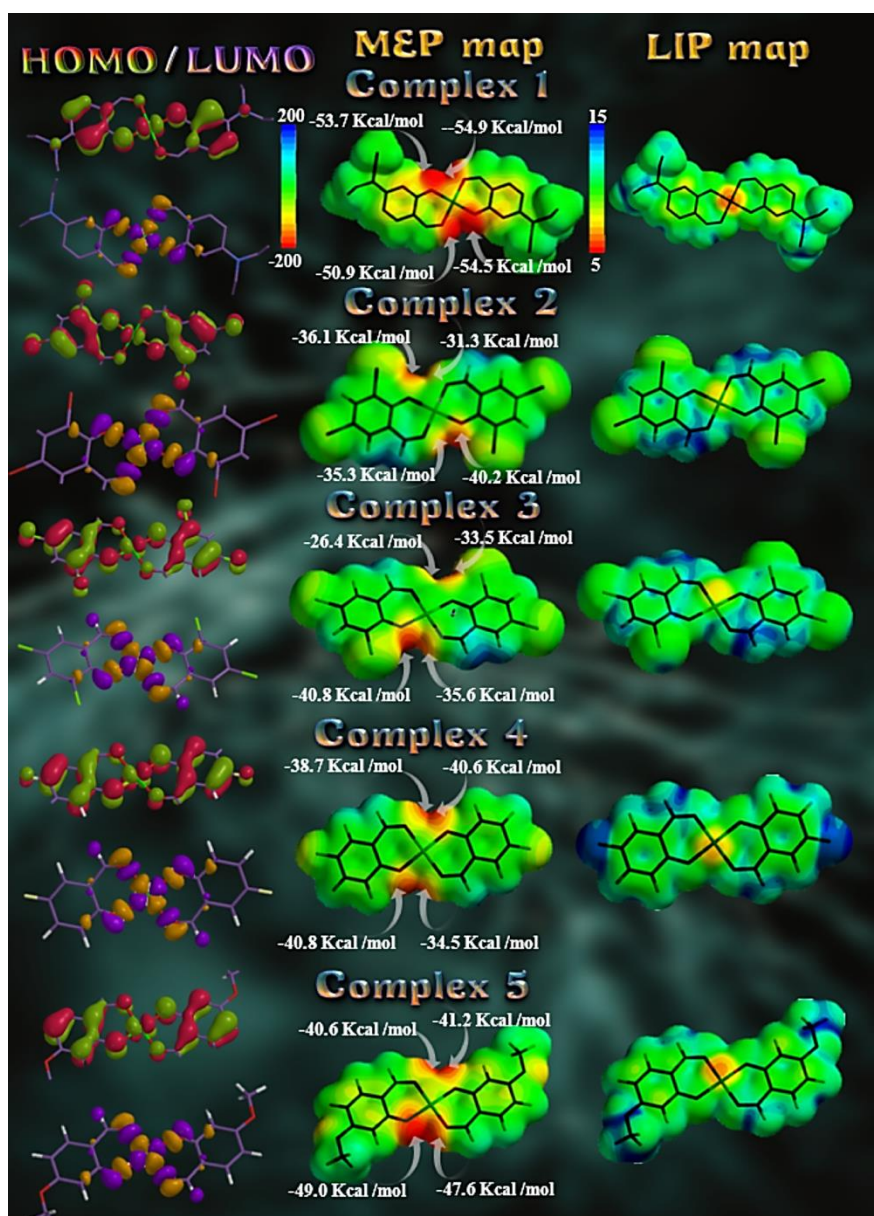

**Figure S14.** Depiction of computed frontier molecular orbitals HOMO and LUMO (solid surface) (left panel), MEP map (center panel, transparent surface), and LIP map (right panel, transparent surface) for complexes 1–5. In MEP maps, a molecular electron density surface (isovalue = 0.002 e/bohr<sup>3</sup>) generally encompassing at least 95% of the electronic charge, mapped with electrostatic potential (superimposed on the isodensity surface). The potential represents electron-rich (red, negative values) and electron-poor (blues, positive values) regions (intermediate values are colored orange, yellow and green) (potential ranges from –200 to 200 kJ/mol for MEP and 5–15 kJ/mol for LIP, shown in color scale). The exact MEP on phenolato and carboxylato oxygens on each molecule is also illustrated. The order of electron rich to poor regions is represented in rainbow colors as red < orange < yellow < green < blue. Colors toward red correspond to negative potential (stabilizing interaction between the molecule and a positive charge), while colors toward blue correspond to positive potential. LIP maps, representing an indicator of electrophilic addition, are an overlay of the energy of electron removal (ionization) on the electron density. By convention, red regions on a local ionization potential map indicate areas from which electron removal (ionization) is relatively easy, meaning that they are subject to electrophilic attack. These are easily distinguished from regions where ionization is relatively difficult (by convention, colored blue). The red and green color distributions represent positive and negative phase in molecular orbital wave function, respectively (isovalue = 0.032 au). HOMO (electron donor regions) determines the ionization potentials (assess the ionization energy), while LUMO (electron acceptor regions) determines the electron affinity.

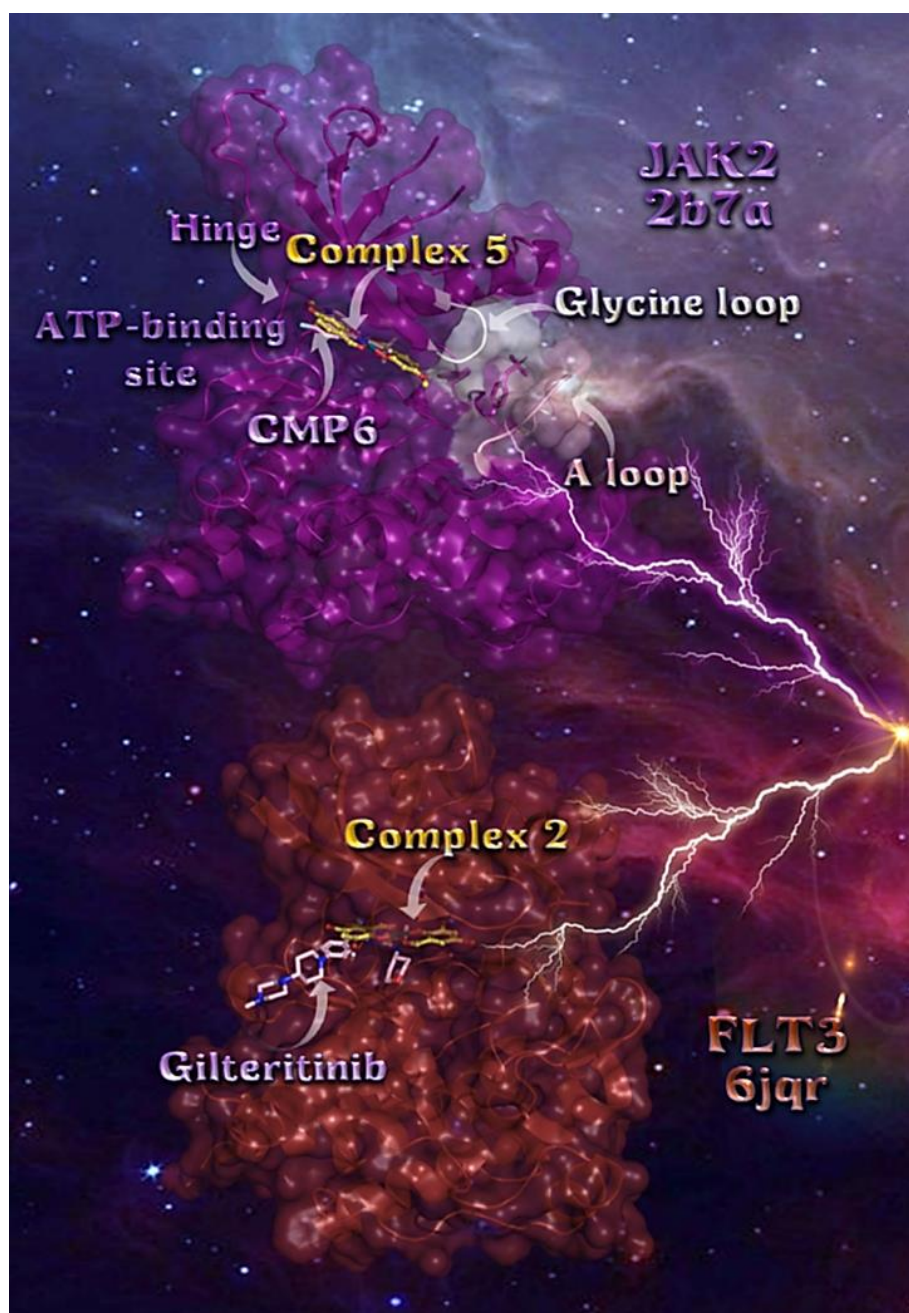

**Figure S15.** (Lower panel) Docking pose orientation of **2** on the crystal structure of the FLT3 kinase domain (PDB: 6jqr) bound with the FLT3 inhibitor Gilteritinib. Target protein is illustrated as cartoon-colored in ruby with depth cue in the ray-tracing rendering of the whole structure with additional depiction of semi-transparent surface colored according to cartoon. At the binding pocket of **2** in the crystal structure of FLT3 is also accommodated the Gilteritinib inhibitor. (Upper panel) Docking pose orientation of **5** on the crystal structure of JAK2 kinase domain (PDB: 2b7a) bound with its inhibitor CMP6. Target protein is illustrated as cartoon-colored in deep purple with depth cue in the ray-tracing rendering of the whole structure with additional depiction of semi-transparent surface colored according to cartoon. At the ATP-binding pocket of **5** in the crystal structure of JAK2 is also accommodated the CMP6 inhibitor. In both structures, complexes **2** and **5** are rendered in ball-and-stick mode colored according to atom type in yellow orange C atoms, while Gilteritinib and CMP6 inhibitors are rendered in stick model colored according to atom type in light pink. Heteroatom color-code: O: red, N: blue, Br: firebrick red, and Pd: deep teal. Hydrogen atoms are omitted from all molecules for shake of clarity. The final structure was ray-traced and illustrated with the aid of PyMol Molecular Graphics Systems.

**Table S1.** Crystallographic data, data collection and refinement details for complex **1**.

|                                                                |                                                                  |
|----------------------------------------------------------------|------------------------------------------------------------------|
| Crystal data                                                   |                                                                  |
| Chemical formula                                               | C <sub>24</sub> H <sub>31</sub> N <sub>3</sub> O <sub>4</sub> Pd |
| $M_r$                                                          | 531.93                                                           |
| Crystal system                                                 | Monoclinic                                                       |
| Space group                                                    | $P2_1/n$                                                         |
| Temperature (K)                                                | 295                                                              |
| $a$ (Å)                                                        | 6.4774 (6)                                                       |
| $b$ (Å)                                                        | 8.7509 (8)                                                       |
| $c$ (Å)                                                        | 21.197 (2)                                                       |
| $\beta$ (°)                                                    | 98.350 (3)                                                       |
| $V$ (Å <sup>3</sup> )                                          | 1188.76 (19)                                                     |
| $Z$                                                            | 2                                                                |
| Radiation type                                                 | Mo $K\alpha$                                                     |
| $\mu$ (mm <sup>-1</sup> )                                      | 0.82                                                             |
| Crystal size (mm)                                              | 0.18 × 0.16 × 0.05                                               |
| Data collection                                                |                                                                  |
| Diffractometer                                                 | Bruker Kappa Apex2                                               |
| Absorption correction                                          | Numerical, Analytical Absorption (De Meulenaer & Tompa, 1965)    |
| $T_{\min}$ , $T_{\max}$                                        | 0.88, 0.96                                                       |
| No. of measured reflections                                    | 5412                                                             |
| No. of independent reflections                                 | 2246                                                             |
| No. of observed [ $I > 2.0\sigma(I)$ ] reflections             | 1960                                                             |
| $R_{\text{int}}$                                               | 0.023                                                            |
| $(\sin \theta/\lambda)_{\max}$ (Å <sup>-1</sup> )              | 0.612                                                            |
| Refinement                                                     |                                                                  |
| $R[F^2 > 2\sigma(F^2)]$                                        | 0.035                                                            |
| $wR(F^2)$                                                      | 0.067                                                            |
| $S$                                                            | 1.00                                                             |
| No. of reflections                                             | 1960                                                             |
| No. of parameters                                              | 145                                                              |
| No. of restraints                                              | 4                                                                |
| H-atom treatment                                               | H-atom parameters constrained                                    |
| $\Delta\rho_{\max}$ , $\Delta\rho_{\min}$ (e Å <sup>-3</sup> ) | 0.56, -0.44                                                      |

**Table S2.** Binding interactions of complex **1** with CT DNA (Atom numbering and bond lengths are derived from PyMol software).

| Complex <b>1</b> moiety  | CT DNA            |                 |                   |
|--------------------------|-------------------|-----------------|-------------------|
|                          | Pyrimidine/Purine | Bond length (Å) | Type <sup>a</sup> |
| 4-Et <sub>2</sub> N-salo | dC11/C4           | 2.8             | Hph               |
|                          | **dC15/O2         | 3.8             | $\pi$ -polar      |
|                          | dC11/C5           | 2.7             | $\pi$ -alkyl      |
|                          | dG10/C4           | 2.7             | $\pi$ -alkyl      |
|                          | dA18/OP1          | 3.0             | P                 |
|                          | dG10/O3           | 3.3             | $\pi$ -polar      |
|                          | *dC11/O2          | 3.5             | P                 |
|                          | **dG10/N2         | 3.8             | Hb                |
|                          | dG10/N3           | 3.7             | P                 |
|                          | ***dG16/N2        | 3.8             | Hb                |
|                          | dA17/C5           | 3.5             | $\pi$ -alkyl      |
|                          | *dG14/N2          | 3.9             | $\pi$ -polar      |
|                          | dG14/N3           | 3.2             | $\pi$ -alkyl      |
|                          | dC15/C2           | 3.9             | Hph               |
|                          | dG16/C4           | 3.0             | $\pi$ -alkyl      |
|                          | dG16/C5           | 2.7             | Hph               |
|                          | dC11/OP1          | 3.4             | $\pi$ -polar      |
|                          | dC11/O4           | 2.4             | P                 |

<sup>a</sup>type of interaction: Hb = hydrogen bond; Hph = hydrophobic; P = polar;  $\pi$ -polar =pi-polar;  $\pi$ -alkyl =pi-alkyl hydrophobic

Complex **1** interrupts interstrand Hb base paring dG14≡dC11 (\*), dG10≡dC15 (\*\*), and dG16≡dC9 (\*\*\*)

**Table S3.** Binding interactions of lowest energy binding pose of complex **3** with *E. coli* and *S. aureus* DNA-gyrases (PDB accession numbers: 1KZN, and 5CDM, respectively). (Atom numbering and bond lengths are derived from PyMol software) (type of interaction:  $\pi$ - $\pi$ : pi-pi sandwich,  $\pi$ -alkyl: pi-alkyl hydrophobic,  $\pi$ -cation and  $\pi$ -anion: pi-charged electrostatic interactions,  $\pi$ -polar: pi-polar, Hb: hydrogen bond, Hph: hydrophobic, P: polar, Halogen bond) (all binding contact residues are common with that of CBN).

| Complex 3 moiety | <i>E. coli</i> DNA-gyrase amino acid residue                             | Bond length (Å) | Type                       |
|------------------|--------------------------------------------------------------------------|-----------------|----------------------------|
| 3,5-diCl-salo    | Val43 (V43)/O                                                            | 4.0             | $\pi$ -polar               |
|                  | Val43 (V43)/O                                                            | 3.5             | Halogen bond               |
|                  | Glu (E50)/O $\epsilon$ 2                                                 | 3.5             | Hb                         |
|                  | Glu (E50)/O $\epsilon$ 2                                                 | 3.3             | $\pi$ -anion               |
|                  | Asp (D73)/O $\delta$ 1                                                   | 2.6             | Halogen bond               |
|                  | Asp (D73)/O $\delta$ 1                                                   | 3.9             | $\pi$ -anion               |
|                  | Arg (R76)/N $\eta$ 1                                                     | 3.7             | $\pi$ -cation              |
|                  | Arg (R76)/C $\zeta$                                                      | 3.3             | Cation-dipole halogen bond |
|                  | Gly (G77)/NH                                                             | 3.3             | Hb                         |
|                  | Gly (G77)/O                                                              | 3.0             | $\pi$ -polar               |
|                  | Ile (I78)/NH                                                             | 3.5             | Hb                         |
|                  | Ile (I78)/C $\gamma$ 1                                                   | 3.7             | Hph                        |
|                  | Pro (P79)/C $\delta$                                                     | 3.2             | $\pi$ -alkyl               |
|                  | Pro (P79)/C $\delta$                                                     | 3.5             | Halogen bond               |
|                  | Val(V120)/C $\gamma$ 2                                                   | 3.5             | $\pi$ -alkyl               |
|                  | Arg (R76)/N $\eta$ 1                                                     | 2.8             | $\pi$ -cation              |
|                  | Thr (T165)/O $\gamma$ 1                                                  | 3.4             | Hb                         |
|                  | Thr (T165)/C $\beta$                                                     | 3.6             | $\pi$ -alkyl               |
| Complex 3 moiety | <i>S. aureus</i> DNA gyrase amino acid residue/<br>DNA Pyrimidine-Purine | Bond length (Å) | Type                       |
| 3,5-diCl-salo    | Arg (R458)/C $\beta$                                                     | 2.6             | $\pi$ -alkyl               |
|                  | Arg (R458)/N $\eta$ 1                                                    | 3.7             | Hb                         |
|                  | Glu (E477)/O $\epsilon$ 1, $\epsilon$ 2                                  | 3.8, 2.9        | $\pi$ -anion               |
|                  | Glu (E477)/O $\epsilon$ 2                                                | 2.7             | Halogen bond               |
|                  | PTR-123/O3P                                                              | 3.7             | $\pi$ -polar               |
| 3,5-diCl-salo    | dG'2009                                                                  | 3.3-3.5         | $\pi$ - $\pi$ sandwich     |
|                  | dG'2009/O                                                                | 3.5             | Halogen bond               |
|                  | dG'2013/O4                                                               | 3.8             | Halogen bond               |
|                  | dG'2009/O4                                                               | 3.4             | Halogen bond               |
|                  | dG'2013/O4                                                               | 2.9             | $\pi$ -polar               |
|                  | dG'2013/N9                                                               | 3.2             | $\pi$ -polar               |
|                  | dG'2013/N3                                                               | 3.2             | P                          |

**Table S4.** Binding interactions of lowest energy binding pose of complexes **1** with 5-LOX bound with NDGA (PDB accession number 6N2W), and **3** with FLAP protein bound with MK-591 (PDB ID: 2Q7M). (Atom numbering and bond lengths are derived from PyMol software) (type of interaction: Hb: hydrogen bond, Hph: hydrophobic, P: polar,  $\pi$ -alkyl: pi-alkyl hydrophobic,  $\pi$ -cation: pi-charged electrostatic interactions,  $\pi$ -polar: pi-polar) (binding contact residues denoted in asterisk are common with that of trolox).

| Complex 1 moiety                                                                  | 5-LOX bound with NDGA amino acid residue - 6N2W | Bond length (Å) | Type                         |
|-----------------------------------------------------------------------------------|-------------------------------------------------|-----------------|------------------------------|
| 4-Et <sub>2</sub> N-salo                                                          | Arg (R370)/N $\eta$ 2                           | 2.6             | Hb                           |
|                                                                                   | Arg (R370)/N $\eta$ 2                           | 3.0             | $\pi$ -cation                |
|                                                                                   | Arg (R370)/N $\eta$ 1                           | 2.3             | Hb                           |
|                                                                                   | *Arg (R457)/N $\eta$ 1                          | 3.5             | $\pi$ -cation                |
|                                                                                   | *Arg (R457)/C $\delta$                          | 3.6             | $\pi$ -alkyl                 |
|                                                                                   | Phe (F450)                                      | 2.8             | $\pi$ -alkyl                 |
|                                                                                   | *Ser (S447)/O                                   | 3.3             | P                            |
|                                                                                   | Leu (L448)/C $\delta$                           | 2.7             | Hph                          |
|                                                                                   | Asp (D442)/O $\delta$ 1                         | 3.0             | $\pi$ -anion                 |
|                                                                                   | Asp (D442)/C $\beta$                            | 3.5             | $\pi$ -alkyl                 |
|                                                                                   | Asp (D285)/O                                    | 3.0             | P                            |
|                                                                                   | Leu (L288)/N                                    | 3.3             | P                            |
|                                                                                   | Leu (L288)/C $\beta$                            | 2.9             | Hph                          |
|                                                                                   | Leu (L288)/C $\delta$ 1                         | 3.0             | Hph                          |
| Complex 3 moiety                                                                  | FLAP bound with MK591 - 2Q7M                    | Bond length (Å) | Type                         |
| 3,5-diCl-salo with $\alpha$ 1 helix of chain E                                    | Ala (A27)/C $\beta$                             | 3.4             | $\pi$ alkyl                  |
|                                                                                   | Gly (G24)/C $\alpha$                            | 3.6             | P                            |
|                                                                                   | Val (V20)/O                                     | 3.1             | $\pi$ -polar                 |
|                                                                                   | Val (V20)/C $\gamma$ 1                          | 3.2             | $\pi$ -alkyl                 |
|                                                                                   | Val (V21)/C $\alpha$                            | 3.9             | $\pi$ -alkyl                 |
| 3,5-diCl-salo with $\alpha$ 2 helix of chain D                                    | Asn (N59)/O                                     | 3.5             | Hydrogen bond $\sigma$ -hole |
|                                                                                   | Asp (D62)/C $\beta$                             | 3.9             | $\pi$ -alkyl                 |
|                                                                                   | Asp (D62)/O                                     | 2.4             | Halogen bond                 |
|                                                                                   | Thr (T66)/C $\gamma$ 2                          | 3.7             | Hph                          |
|                                                                                   | Thr (T66)/O $\gamma$ 1                          | 2.7             | Halogen bond                 |
| 3,5-diCl-salo with $\alpha$ 4 helix of chain D                                    | Lys (K116)/C $\epsilon$                         | 3.5             | P                            |
|                                                                                   | Lys (K116)/NH                                   | 3.6             | Hb                           |
|                                                                                   | Phe (F123)                                      | 3.1             | Halogen- $\pi$               |
| 3,5-diCl-salo with C2 loop connecting $\alpha$ 3 to $\alpha$ 4 helices of chain D | Tyr (Y112)                                      | 3.2             | Halogen- $\pi$               |
|                                                                                   | Tyr (Y112)/O                                    | 3.2             | $\pi$ -polar                 |

**Table S5.** Calculated molecular physicochemical pharmacokinetics properties of complexes **1–5** related to Lipinski's Rule of Five with the aid of Molinspiration property engine v2018.10.

| Property              | 1      | 2      | 3      | 4      | 5      |
|-----------------------|--------|--------|--------|--------|--------|
| <b>nON*</b>           | 6      | 4      | 4      | 4      | 6      |
| <b>nOHNH**</b>        | 0      | 0      | 0      | 0      | 0      |
| <b>miLogP</b>         | 2.77   | 3.59   | 3.06   | 1.80   | 1.18   |
| <b>MW</b>             | 505.01 | > 500  | 505.54 | 398.74 | 422.81 |
| <b>TPSA</b>           | 43.41  | 36.94  | 36.94  | 36.94  | 55.40  |
| <b>natoms</b>         | 29     | 23     | 23     | 21     | 23     |
| <b>nrotb</b>          | 6      | 0      | 0      | 0      | 0      |
| <b>volume</b>         | 438.76 | 351.33 | 333.94 | 289.60 | 330.83 |
| <b>Nviolations***</b> | 1      | 1      | 1      | 0      | 0      |

\*Hydrogen Bond Acceptors (HBA) (the sum of Os and Ns)

\*\*Hydrogen Bond Donors (HBD)(the sum of OHs andNHs)

\*\*\*Number of violations according to Lipinski's rule validation

**Table S6.** Determination of drug-likeness score of complexes **1–5** through molinspiration bioactivity score v2018.03.

| <b>Properties</b>       | <b>1</b> | <b>2</b> | <b>3</b> | <b>4</b> | <b>5</b> |
|-------------------------|----------|----------|----------|----------|----------|
| GPCR                    | 0.20     | 0.03     | 0.07     | 0.34     | 0.17     |
| Ion channel modulator   | 0.09     | −0.21    | −0.05    | 0.25     | 0.17     |
| Kinase inhibitor        | −0.02    | −0.25    | −0.12    | 0.21     | 0.01     |
| Nuclear receptor ligand | −0.03    | 0.11     | −0.02    | 0.35     | 0.22     |
| Protease inhibitor      | 0.23     | 0.04     | 0.07     | 0.53     | 0.30     |
| Enzyme inhibitor        | 0.10     | 0.04     | 0.08     | 0.38     | 0.31     |

**Table S7.** Rat acute toxicity predicted by GUSAR (on the Basis of PASS Prediction) for complexes 1–5.

| Acute rat toxicity prediction parameters                          | 1              | 2              | 3                  | 4                 | 5              |
|-------------------------------------------------------------------|----------------|----------------|--------------------|-------------------|----------------|
| Rat LD <sub>50</sub> values                                       |                |                |                    |                   |                |
| <b>Rat IP<sup>a</sup> LD<sub>50</sub> (mg/kg)</b>                 | 277,900 in AD  | 877,700 in AD  | 11,940 out of AD   | 289,400 in AD     | 946,500 in AD  |
| <b>Rat IV<sup>b</sup> LD<sub>50</sub> (mg/kg)</b>                 | 77,030 in AD   | 85,770 in AD   | 64,290 in AD       | 77,660 in AD      | 94,720 in AD   |
| <b>Rat Oral<sup>c</sup> LD<sub>50</sub> (mg/kg)</b>               | 1509,000 in AD | 2105,000 in AD | 3613,000 out of AD | 221,200 out of AD | 2245,000 in AD |
| <b>Rat SC<sup>d</sup> LD<sub>50</sub> (mg/kg)</b>                 | 598,300 in AD  | 1096,000 in AD | 1370,000 in AD     | 1510,000 in AD    | 2363,000 in AD |
| Acute rodent toxicity classification of compounds by OECD project |                |                |                    |                   |                |
| <b>Rat IP LD<sub>50</sub> Classification</b>                      | Class 4 in AD  | Class 5 in AD  | Class 3 out of AD  | Class 4 in AD     | Class 5 in AD  |
| <b>Rat IV LD<sub>50</sub> Classification</b>                      | Class 4 in AD  | Class 4 in AD  | Class 4 in AD      | Class 4 in AD     | Class 4 in AD  |
| <b>Rat Oral LD<sub>50</sub> Classification</b>                    | Class 4 in AD  | Class 5 in AD  | Class 5 out of AD  | Class 3 out of AD | Class 5 in AD  |
| <b>Rat SC LD<sub>50</sub> Classification</b>                      | Class 4 in AD  | Class 5 in AD  | Class 5 in AD      | Class 5 in AD     | Class 5 in AD  |

<sup>a</sup> IP - Intraperitoneal route of administration

<sup>b</sup> IV –Intravenous route of administration

<sup>c</sup> Oral –Oral route of administration

<sup>d</sup> SC –Subcutaneous route of administration

in AD - compound falls in the applicability domain of the model

out of AD - compound is out of the applicability domain of the model

**Table S8.** Substrate/Metabolite specificity Prediction (SMP) for complexes **1–5**.**Complex 1****Pa > Pi****Substrate based prediction result**

| Pa    | Pi    | Enzyme            |
|-------|-------|-------------------|
| 0.461 | 0.137 | 2A6               |
| 0.464 | 0.164 | 2C8               |
| 0.412 | 0.141 | 2B6               |
| 0.384 | 0.166 | 2E1               |
| 0.343 | 0.158 | 3A4               |
| 0.329 | 0.230 | 1A1               |
| 0.206 | 0.112 | Aldoketoreductase |
| 0.270 | 0.202 | 2C19              |
| 0.252 | 0.219 | 2D6               |

**Metabolite based prediction result**

| Pa    | Pi    | Enzyme            |
|-------|-------|-------------------|
| 0.497 | 0.113 | 2C19              |
| 0.452 | 0.107 | UGT2B7            |
| 0.406 | 0.116 | UGT2B4            |
| 0.368 | 0.111 | UGT2B10           |
| 0.386 | 0.173 | 3A4               |
| 0.355 | 0.167 | 2D6               |
| 0.285 | 0.166 | UGT2B17           |
| 0.209 | 0.128 | Aldoketoreductase |
| 0.249 | 0.225 | 2B6               |
| 0.246 | 0.231 | 2A6               |

**Complex 2****Pa > Pi****Substrate based prediction result**

| Pa    | Pi    | Enzyme            |
|-------|-------|-------------------|
| 0.529 | 0.102 | 2A6               |
| 0.515 | 0.099 | 2B6               |
| 0.261 | 0.064 | Aldoketoreductase |

|       |       |     |
|-------|-------|-----|
| 0.381 | 0.245 | 2C8 |
| 0.334 | 0.223 | 2E1 |

### Metabolite based prediction result

| Pa    | Pi    | Enzyme            |
|-------|-------|-------------------|
| 0.377 | 0.093 | UGT2B10           |
| 0.276 | 0.071 | Aldoketoreductase |
| 0.318 | 0.172 | 2B6               |
| 0.325 | 0.200 | UGT1A4            |
| 0.314 | 0.223 | 3A4               |
| 0.303 | 0.215 | 2D6               |
| 0.292 | 0.210 | UGT2B4            |
| 0.270 | 0.191 | UGT1A6            |
| 0.284 | 0.225 | UGT2B7            |
| 0.227 | 0.193 | 2E1               |
| 0.234 | 0.232 | UGT2B17           |
| 0.241 | 0.239 | 2A6               |

### Complex 3

**Pa > Pi**

### Substrate based prediction result

| Pa    | Pi    | Enzyme            |
|-------|-------|-------------------|
| 0.505 | 0.111 | 2E1               |
| 0.406 | 0.175 | 2A6               |
| 0.399 | 0.219 | 2C8               |
| 0.356 | 0.176 | 2B6               |
| 0.232 | 0.089 | Aldoketoreductase |

### Metabolite based prediction result

| Pa    | Pi    | Enzyme            |
|-------|-------|-------------------|
| 0.390 | 0.073 | UGT2B10           |
| 0.387 | 0.132 | UGT2B4            |
| 0.248 | 0.091 | Aldoketoreductase |
| 0.324 | 0.202 | UGT1A4            |
| 0.309 | 0.199 | UGT2B7            |
| 0.295 | 0.186 | 2B6               |

|       |       |         |
|-------|-------|---------|
| 0.280 | 0.190 | 2A6     |
| 0.268 | 0.187 | UGT2B17 |
| 0.268 | 0.193 | UGT1A6  |
| 0.239 | 0.182 | 2E1     |

#### Complex 4

**Pa > Pi**

##### Substrate based prediction result

| Pa    | Pi    | Enzyme |
|-------|-------|--------|
| 0.425 | 0.119 | 3A4    |
| 0.267 | 0.205 | 2C19   |

##### Metabolite based prediction result

| Pa    | Pi    | Enzyme  |
|-------|-------|---------|
| 0.457 | 0.134 | 2C19    |
| 0.450 | 0.141 | 3A4     |
| 0.433 | 0.201 | 2C9     |
| 0.315 | 0.196 | UGT1A9  |
| 0.315 | 0.217 | UGT2B10 |

#### Complex 5

**Pa > Pi**

##### Substrate based prediction result

| Pa    | Pi    | Enzyme            |
|-------|-------|-------------------|
| 0.431 | 0.188 | 2C8               |
| 0.373 | 0.138 | 3A4               |
| 0.230 | 0.091 | Aldoketoreductase |
| 0.310 | 0.222 | 2B6               |
| 0.289 | 0.266 | 2E1               |
| 0.304 | 0.282 | 2A6               |

##### Metabolite based prediction result

| Pa    | Pi    | Enzyme  |
|-------|-------|---------|
| 0.400 | 0.062 | UGT2B10 |

|       |       |                   |
|-------|-------|-------------------|
| 0.431 | 0.098 | UGT2B4            |
| 0.343 | 0.118 | UGT2B17           |
| 0.376 | 0.179 | 3A4               |
| 0.254 | 0.087 | Aldoketoreductase |
| 0.295 | 0.168 | 2C8               |
| 0.314 | 0.194 | UGT2B7            |
| 0.246 | 0.164 | UGT2B15           |
| 0.287 | 0.252 | UGT1A4            |
| 0.238 | 0.222 | UGT1A6            |

**Table S9.** ROSC–Pred: Rodent Organ–Specific Carcinogenicity Prediction for complexes **1–5**.

**Complex 1**

**Pa > Pi**

The structure is out of the applicability domain. Percentage of new MNA descriptors: **35.5 %**

| Rats  |       |                           |        |       |                      |
|-------|-------|---------------------------|--------|-------|----------------------|
| Male  |       |                           | Female |       |                      |
| Pa    | Pi    | Organs                    | Pa     | Pi    | Organs               |
| 0.528 | 0.059 | vascular system           | 0.520  | 0.237 | uterus               |
| 0.526 | 0.155 | liver                     | 0.389  | 0.112 | vascular system      |
| 0.413 | 0.186 | all tumor bearing animals | 0.453  | 0.353 | hematopoietic system |
| 0.459 | 0.276 | hematopoietic system      | 0.272  | 0.258 | nasal cavity         |
| 0.352 | 0.254 | nasal cavity              |        |       |                      |
| 0.383 | 0.339 | thyroid gland             |        |       |                      |
| 0.168 | 0.160 | esophagus                 |        |       |                      |
| Mice  |       |                           |        |       |                      |
| Male  |       |                           | Female |       |                      |
| Pa    | Pi    | Organs                    | Pa     | Pi    | Organs               |
| 0.396 | 0.301 | lung                      | 0.460  | 0.090 | pituitary gland      |

**Complex 2**

The structure is out of the applicability domain. Percentage of new MNA descriptors: **56 %**

| Rats  |       |                      |        |       |                      |
|-------|-------|----------------------|--------|-------|----------------------|
| Male  |       |                      | Female |       |                      |
| Pa    | Pi    | Organs               | Pa     | Pi    | Organs               |
| 0.765 | 0.043 | stomach              | 0.807  | 0.051 | stomach              |
| 0.777 | 0.127 | kidney               | 0.621  | 0.063 | kidney               |
| 0.659 | 0.073 | hematopoietic system | 0.471  | 0.092 | vascular system      |
| 0.549 | 0.106 | oral cavity          | 0.450  | 0.078 | nasal cavity         |
| 0.482 | 0.059 | large intestine      | 0.560  | 0.228 | hematopoietic system |
| 0.508 | 0.099 | nasal cavity         | 0.527  | 0.223 | uterus               |
| 0.460 | 0.083 | vascular system      | 0.433  | 0.190 | liver                |
| 0.529 | 0.164 | thyroid gland        | 0.291  | 0.086 | oral cavity          |
| 0.520 | 0.160 | liver                | 0.362  | 0.246 | thyroid gland        |
| 0.273 | 0.160 | lung                 | 0.292  | 0.186 | mammary gland        |
|       |       |                      | 0.309  | 0.251 | lung                 |
| Mice  |       |                      |        |       |                      |
| Male  |       |                      | Female |       |                      |
| Pa    | Pi    | Organs               | Pa     | Pi    | Organs               |
| 0.904 | 0.006 | stomach              | 0.730  | 0.013 | lung                 |

|       |       |                 |       |       |                      |
|-------|-------|-----------------|-------|-------|----------------------|
| 0.717 | 0.028 | kidney          | 0.753 | 0.041 | stomach              |
| 0.627 | 0.059 | lung            | 0.566 | 0.027 | pituitary gland      |
| 0.383 | 0.238 | vascular system | 0.576 | 0.145 | hematopoietic system |
| 0.117 | 0.018 | small intestine | 0.216 | 0.079 | peritoneal cavity    |
|       |       |                 | 0.361 | 0.232 | ovary                |
|       |       |                 | 0.381 | 0.262 | liver                |
|       |       |                 | 0.117 | 0.018 | small intestine      |
|       |       |                 | 0.399 | 0.382 | urinary bladder      |

### Complex 3

The structure is out of the applicability domain. Percentage of new MNA descriptors: **44 %**

| Rats  |       |                      |        |       |                      |
|-------|-------|----------------------|--------|-------|----------------------|
| Male  |       |                      | Female |       |                      |
| Pa    | Pi    | Organs               | Pa     | Pi    | Organs               |
| 0.629 | 0.072 | liver                | 0.272  | 0.150 | vascular system      |
| 0.501 | 0.230 | hematopoietic system | 0.451  | 0.364 | uterus               |
| 0.365 | 0.153 | vascular system      | 0.437  | 0.373 | hematopoietic system |
| 0.454 | 0.370 | kidney               | 0.332  | 0.305 | stomach              |
| 0.313 | 0.272 | oral cavity          |        |       |                      |
| 0.368 | 0.358 | thyroid gland        |        |       |                      |
|       |       |                      |        |       |                      |
| Mice  |       |                      |        |       |                      |
| Male  |       |                      | Female |       |                      |
| Pa    | Pi    | Organs               | Pa     | Pi    | Organs               |
| 0.901 | 0.015 | liver                | 0.904  | 0.020 | liver                |
| 0.525 | 0.195 | stomach              | 0.643  | 0.038 | lung                 |
| 0.099 | 0.037 | small intestine      | 0.478  | 0.069 | pituitary gland      |
|       |       |                      | 0.473  | 0.176 | stomach              |
|       |       |                      | 0.183  | 0.111 | peritoneal cavity    |
|       |       |                      | 0.099  | 0.037 | small intestine      |

### Complex 4

The structure is out of the applicability domain. Percentage of new MNA descriptors: **56 %**

| Rats  |       |                      |        |       |                      |
|-------|-------|----------------------|--------|-------|----------------------|
| Male  |       |                      | Female |       |                      |
| Pa    | Pi    | Organs               | Pa     | Pi    | Organs               |
| 0.598 | 0.124 | hematopoietic system | 0.471  | 0.092 | vascular system      |
| 0.460 | 0.083 | vascular system      | 0.560  | 0.228 | hematopoietic system |
| 0.499 | 0.196 | thyroid gland        | 0.527  | 0.223 | uterus               |
| 0.574 | 0.299 | kidney               | 0.450  | 0.251 | kidney               |
| 0.475 | 0.212 | liver                | 0.371  | 0.176 | lung                 |
| 0.420 | 0.175 | nasal cavity         | 0.390  | 0.234 | liver                |
| 0.393 | 0.237 | stomach              | 0.323  | 0.171 | nasal cavity         |
| 0.269 | 0.168 | lung                 | 0.376  | 0.260 | stomach              |

|       |       |                 |        |       |                      |
|-------|-------|-----------------|--------|-------|----------------------|
| 0.301 | 0.287 | oral cavity     |        |       |                      |
|       |       |                 |        |       |                      |
| Mice  |       |                 |        |       |                      |
| Male  |       |                 | Female |       |                      |
| Pa    | Pi    | Organs          | Pa     | Pi    | Organs               |
| 0.628 | 0.138 | stomach         | 0.660  | 0.100 | stomach              |
| 0.475 | 0.205 | lung            | 0.566  | 0.027 | pituitary gland      |
| 0.383 | 0.238 | vascular system | 0.542  | 0.171 | hematopoietic system |
| 0.117 | 0.018 | small intestine | 0.216  | 0.079 | peritoneal cavity    |
|       |       |                 | 0.361  | 0.232 | ovary                |
|       |       |                 | 0.402  | 0.279 | lung                 |
|       |       |                 | 0.117  | 0.018 | small intestine      |
|       |       |                 | 0.399  | 0.382 | urinary bladder      |

## Complex 5

The structure is out of the applicability domain. Percentage of new MNA descriptors: **29.6 %**

|             |       |                      |               |       |                      |
|-------------|-------|----------------------|---------------|-------|----------------------|
| <b>Rats</b> |       |                      |               |       |                      |
| <b>Male</b> |       |                      | <b>Female</b> |       |                      |
| Pa          | Pi    | Organs               | Pa            | Pi    | Organs               |
| 0.382       | 0.135 | vascular system      | 0.243         | 0.163 | vascular system      |
| 0.466       | 0.269 | hematopoietic system | 0.439         | 0.370 | hematopoietic system |
| 0.429       | 0.267 | liver                | 0.269         | 0.263 | nasal cavity         |
|             |       |                      |               |       |                      |
| <b>Mice</b> |       |                      |               |       |                      |
| <b>Male</b> |       |                      | <b>Female</b> |       |                      |
| Pa          | Pi    | Organs               | Pa            | Pi    | Organs               |
| 0.508       | 0.207 | stomach              | 0.491         | 0.221 | hematopoietic system |
| 0.365       | 0.348 | lung                 | 0.408         | 0.149 | pituitary gland      |

**Table S10.** Quantitative prediction of anti–target interaction profiles for complexes**1–5**.Quantitative prediction of anti–target interaction profiles for complex **1**

| Activity                                                             | Prediction Value, -<br>Log10(Value), Mole | Applicability Domain |
|----------------------------------------------------------------------|-------------------------------------------|----------------------|
| 5-hydroxytryptamine 1B receptor antagonist IC50                      | 5,885                                     | Out of AD            |
| 5-hydroxytryptamine 1B receptor antagonist Ki                        | 6,831                                     | In AD                |
| 5-hydroxytryptamine 2A receptor antagonist IC50                      | 7,379                                     | Out of AD            |
| 5-hydroxytryptamine 2A receptor antagonist Ki                        | 6,364                                     | Out of AD            |
| 5-hydroxytryptamine 2C receptor antagonist IC50                      | 6,469                                     | In AD                |
| 5-hydroxytryptamine 2C receptor antagonist Ki                        | 6,890                                     | Out of AD            |
| alpha1a adrenergic receptor antagonist IC50                          | 6,031                                     | Out of AD            |
| alpha1a adrenergic receptor antagonist Ki                            | 6,755                                     | Out of AD            |
| alpha1b adrenergic receptor antagonist Ki                            | 6,698                                     | Out of AD            |
| Alpha-2A adrenergic receptor antagonist IC50                         | 6,033                                     | In AD                |
| Alpha-2A adrenergic receptor antagonist Ki                           | 6,180                                     | In AD                |
| amine oxidase [flavin-containing] A inhibitor IC50                   | 5,456                                     | In AD                |
| amine oxidase [flavin-containing] A inhibitor Ki                     | 5,519                                     | In AD                |
| androgen receptor antagonist IC50                                    | 5,515                                     | In AD                |
| carbonic anhydrase I activator Kact                                  | 8,372                                     | In AD                |
| carbonic anhydrase I inhibitor Ki                                    | 7,359                                     | In AD                |
| Carbonic anhydrase 2 activator Kact                                  | 8,713                                     | In AD                |
| carbonic anhydrase II inhibitor Ki                                   | 7,707                                     | Out of AD            |
| D(1A) dopamine receptor antagonist IC50                              | 4,772                                     | In AD                |
| D(1A) dopamine receptor antagonist Ki                                | 5,692                                     | In AD                |
| D3 dopamine receptor antagonist Ki                                   | 6,387                                     | Out of AD            |
| delta-type opioid receptor antagonist Ki                             | 5,951                                     | Out of AD            |
| estrogen receptor antagonist IC50                                    | 6,171                                     | In AD                |
| estrogen receptor antagonist Ki                                      | 6,669                                     | In AD                |
| kappa-type opioid receptor antagonist Ki                             | 5,483                                     | Out of AD            |
| mu-type opioid receptor antagonist IC50                              | 5,354                                     | In AD                |
| mu-type opioid receptor antagonist Ki                                | 5,456                                     | In AD                |
| sodium- and chloride-dependent GABA transporter 1<br>antagonist IC50 | 4,454                                     | In AD                |
| sodium-dependent dopamine transporter antagonist IC50                | 5,470                                     | Out of AD            |
| sodium-dependent dopamine transporter antagonist Ki                  | 5,927                                     | In AD                |
| sodium-dependent serotonin transporter antagonist IC50               | 5,279                                     | Out of AD            |
| sodium-dependent serotonin transporter antagonist Ki                 | 6,223                                     | Out of AD            |

**The total number of anti–target(s): 8**

in AD – compound falls in the applicability domain of the model

out of AD –compound is out of the applicability domain of the model

## Quantitative prediction of anti-target interaction profiles for chemical complex 2

| Activity                                                             | Prediction Value, -<br>Log10(Value), Mole | Applicability Domain |
|----------------------------------------------------------------------|-------------------------------------------|----------------------|
| 5-hydroxytryptamine 1B receptor antagonist IC50                      | 4,752                                     | Out of AD            |
| 5-hydroxytryptamine 1B receptor antagonist Ki                        | 6,073                                     | Out of AD            |
| 5-hydroxytryptamine 2A receptor antagonist IC50                      | 7,070                                     | Out of AD            |
| 5-hydroxytryptamine 2A receptor antagonist Ki                        | 8,043                                     | Out of AD            |
| 5-hydroxytryptamine 2C receptor antagonist IC50                      | 7,272                                     | In AD                |
| 5-hydroxytryptamine 2C receptor antagonist Ki                        | 7,388                                     | Out of AD            |
| alpha1a adrenergic receptor antagonist IC50                          | 5,423                                     | Out of AD            |
| alpha1a adrenergic receptor antagonist Ki                            | 5,766                                     | Out of AD            |
| alpha1b adrenergic receptor antagonist Ki                            | 6,597                                     | Out of AD            |
| Alpha-2A adrenergic receptor antagonist IC50                         | 5,319                                     | In AD                |
| Alpha-2A adrenergic receptor antagonist Ki                           | 6,141                                     | Out of AD            |
| amine oxidase [flavin-containing] A inhibitor IC50                   | 5,706                                     | In AD                |
| amine oxidase [flavin-containing] A inhibitor Ki                     | 4,629                                     | In AD                |
| androgen receptor antagonist IC50                                    | 5,792                                     | In AD                |
| carbonic anhydrase I activator Kact                                  | 8,600                                     | In AD                |
| carbonic anhydrase I inhibitor Ki                                    | 7,570                                     | Out of AD            |
| Carbonic anhydrase 2 activator Kact                                  | 8,985                                     | In AD                |
| carbonic anhydrase II inhibitor Ki                                   | 8,950                                     | Out of AD            |
| D(1A) dopamine receptor antagonist IC50                              | 5,593                                     | In AD                |
| D(1A) dopamine receptor antagonist Ki                                | 6,319                                     | In AD                |
| D3 dopamine receptor antagonist Ki                                   | 5,337                                     | Out of AD            |
| delta-type opioid receptor antagonist Ki                             | 5,921                                     | Out of AD            |
| estrogen receptor antagonist IC50                                    | 6,077                                     | In AD                |
| estrogen receptor antagonist Ki                                      | 6,495                                     | In AD                |
| kappa-type opioid receptor antagonist Ki                             | 5,192                                     | Out of AD            |
| mu-type opioid receptor antagonist IC50                              | 6,073                                     | Out of AD            |
| mu-type opioid receptor antagonist Ki                                | 6,623                                     | Out of AD            |
| sodium- and chloride-dependent GABA transporter 1<br>antagonist IC50 | 4,084                                     | Out of AD            |
| sodium-dependent dopamine transporter antagonist IC50                | 6,221                                     | Out of AD            |
| sodium-dependent dopamine transporter antagonist Ki                  | 5,592                                     | Out of AD            |
| sodium-dependent serotonin transporter antagonist IC50               | 6,470                                     | Out of AD            |
| sodium-dependent serotonin transporter antagonist Ki                 | 6,129                                     | Out of AD            |

**The total number of anti-target(s): 6**

in AD – compound falls in the applicability domain of the model

out of AD – compound is out of the applicability domain of the model

### Quantitative prediction of anti–target interaction profiles for chemical complex 3

| Activity                                                          | Prediction Value, -<br>Log10(Value), Mole | Applicability Domain |
|-------------------------------------------------------------------|-------------------------------------------|----------------------|
| 5-hydroxytryptamine 1B receptor antagonist IC50                   | 5,498                                     | Out of AD            |
| 5-hydroxytryptamine 1B receptor antagonist Ki                     | 6,635                                     | In AD                |
| 5-hydroxytryptamine 2A receptor antagonist IC50                   | 7,011                                     | Out of AD            |
| 5-hydroxytryptamine 2A receptor antagonist Ki                     | 6,637                                     | Out of AD            |
| 5-hydroxytryptamine 2C receptor antagonist IC50                   | 7,394                                     | In AD                |
| 5-hydroxytryptamine 2C receptor antagonist Ki                     | 6,946                                     | Out of AD            |
| alpha1a adrenergic receptor antagonist IC50                       | 5,659                                     | Out of AD            |
| alpha1a adrenergic receptor antagonist Ki                         | 5,886                                     | Out of AD            |
| alpha1b adrenergic receptor antagonist Ki                         | 6,998                                     | Out of AD            |
| Alpha-2A adrenergic receptor antagonist IC50                      | 5,608                                     | Out of AD            |
| Alpha-2A adrenergic receptor antagonist Ki                        | 6,058                                     | In AD                |
| amine oxidase [flavin-containing] A inhibitor IC50                | 5,719                                     | In AD                |
| amine oxidase [flavin-containing] A inhibitor Ki                  | 5,515                                     | In AD                |
| androgen receptor antagonist IC50                                 | 5,686                                     | In AD                |
| carbonic anhydrase I activator Kact                               | 6,717                                     | In AD                |
| carbonic anhydrase I inhibitor Ki                                 | 7,197                                     | Out of AD            |
| Carbonic anhydrase 2 activator Kact                               | 8,809                                     | In AD                |
| carbonic anhydrase II inhibitor Ki                                | 8,728                                     | Out of AD            |
| D(1A) dopamine receptor antagonist IC50                           | 5,122                                     | In AD                |
| D(1A) dopamine receptor antagonist Ki                             | 6,618                                     | In AD                |
| D3 dopamine receptor antagonist Ki                                | 6,016                                     | Out of AD            |
| delta-type opioid receptor antagonist Ki                          | 5,524                                     | Out of AD            |
| estrogen receptor antagonist IC50                                 | 5,862                                     | In AD                |
| estrogen receptor antagonist Ki                                   | 5,697                                     | In AD                |
| kappa-type opioid receptor antagonist Ki                          | 5,976                                     | Out of AD            |
| mu-type opioid receptor antagonist IC50                           | 4,855                                     | Out of AD            |
| mu-type opioid receptor antagonist Ki                             | 5,934                                     | Out of AD            |
| sodium- and chloride-dependent GABA transporter 1 antagonist IC50 | 4,196                                     | In AD                |
| sodium-dependent dopamine transporter antagonist IC50             | 6,318                                     | Out of AD            |
| sodium-dependent dopamine transporter antagonist Ki               | 6,185                                     | Out of AD            |
| sodium-dependent serotonin transporter antagonist IC50            | 5,480                                     | Out of AD            |
| sodium-dependent serotonin transporter antagonist Ki              | 6,222                                     | Out of AD            |

**The total number of anti–target(s): 8**

in AD – compound falls in the applicability domain of the model

out of AD – compound is out of the applicability domain of the model

## Quantitative prediction of anti–target interaction profiles for chemical complex 4

| Activity                                                             | Prediction Value, -<br>Log10(Value), Mole | Applicability Domain |
|----------------------------------------------------------------------|-------------------------------------------|----------------------|
| 5-hydroxytryptamine 1B receptor antagonist IC50                      | 5,711                                     | Out of AD            |
| 5-hydroxytryptamine 1B receptor antagonist Ki                        | 5,911                                     | In AD                |
| 5-hydroxytryptamine 2A receptor antagonist IC50                      | 7,301                                     | Out of AD            |
| 5-hydroxytryptamine 2A receptor antagonist Ki                        | 6,965                                     | In AD                |
| 5-hydroxytryptamine 2C receptor antagonist IC50                      | 7,214                                     | In AD                |
| 5-hydroxytryptamine 2C receptor antagonist Ki                        | 6,703                                     | Out of AD            |
| alpha1a adrenergic receptor antagonist IC50                          | 5,885                                     | Out of AD            |
| alpha1a adrenergic receptor antagonist Ki                            | 5,629                                     | Out of AD            |
| alpha1b adrenergic receptor antagonist Ki                            | 7,085                                     | Out of AD            |
| Alpha-2A adrenergic receptor antagonist IC50                         | 5,451                                     | In AD                |
| Alpha-2A adrenergic receptor antagonist Ki                           | 5,995                                     | In AD                |
| amine oxidase [flavin-containing] A inhibitor IC50                   | 5,310                                     | In AD                |
| amine oxidase [flavin-containing] A inhibitor Ki                     | 5,727                                     | In AD                |
| androgen receptor antagonist IC50                                    | 6,050                                     | Out of AD            |
| carbonic anhydrase I activator Kact                                  | 8,431                                     | In AD                |
| carbonic anhydrase I inhibitor Ki                                    | 7,962                                     | Out of AD            |
| Carbonic anhydrase 2 activator Kact                                  | 8,896                                     | In AD                |
| carbonic anhydrase II inhibitor Ki                                   | 8,220                                     | Out of AD            |
| D(1A) dopamine receptor antagonist IC50                              | 5,293                                     | In AD                |
| D(1A) dopamine receptor antagonist Ki                                | 6,704                                     | In AD                |
| D3 dopamine receptor antagonist Ki                                   | 5,900                                     | Out of AD            |
| delta-type opioid receptor antagonist Ki                             | 5,441                                     | Out of AD            |
| estrogen receptor antagonist IC50                                    | 5,555                                     | In AD                |
| estrogen receptor antagonist Ki                                      | 6,123                                     | In AD                |
| kappa-type opioid receptor antagonist Ki                             | 5,600                                     | Out of AD            |
| mu-type opioid receptor antagonist IC50                              | 5,044                                     | In AD                |
| mu-type opioid receptor antagonist Ki                                | 6,038                                     | Out of AD            |
| sodium- and chloride-dependent GABA transporter 1<br>antagonist IC50 | 4,637                                     | In AD                |
| sodium-dependent dopamine transporter antagonist IC50                | 5,629                                     | Out of AD            |
| sodium-dependent dopamine transporter antagonist Ki                  | 6,919                                     | Out of AD            |
| sodium-dependent serotonin transporter antagonist IC50               | 5,586                                     | Out of AD            |
| sodium-dependent serotonin transporter antagonist Ki                 | 7,099                                     | Out of AD            |

**The total number of anti–target(s): 7**

in AD – compound falls in the applicability domain of the model

out of AD – compound is out of the applicability domain of the model

## Quantitative prediction of anti–target interaction profiles for chemical complex 5

| Activity                                                          | Prediction Value, -<br>Log10(Value), Mole | Applicability Domain |
|-------------------------------------------------------------------|-------------------------------------------|----------------------|
| 5-hydroxytryptamine 1B receptor antagonist IC50                   | 4,531                                     | Out of AD            |
| 5-hydroxytryptamine 1B receptor antagonist Ki                     | 6,274                                     | In AD                |
| 5-hydroxytryptamine 2A receptor antagonist IC50                   | 6,801                                     | Out of AD            |
| 5-hydroxytryptamine 2A receptor antagonist Ki                     | 5,995                                     | In AD                |
| 5-hydroxytryptamine 2C receptor antagonist IC50                   | 7,191                                     | In AD                |
| 5-hydroxytryptamine 2C receptor antagonist Ki                     | 6,325                                     | Out of AD            |
| alpha1a adrenergic receptor antagonist IC50                       | 6,131                                     | Out of AD            |
| alpha1a adrenergic receptor antagonist Ki                         | 6,698                                     | Out of AD            |
| alpha1b adrenergic receptor antagonist Ki                         | 7,103                                     | Out of AD            |
| Alpha-2A adrenergic receptor antagonist IC50                      | 5,845                                     | In AD                |
| Alpha-2A adrenergic receptor antagonist Ki                        | 5,949                                     | In AD                |
| amine oxidase [flavin-containing] A inhibitor IC50                | 5,212                                     | In AD                |
| amine oxidase [flavin-containing] A inhibitor Ki                  | 6,591                                     | In AD                |
| androgen receptor antagonist IC50                                 | 6,040                                     | Out of AD            |
| carbonic anhydrase I activator Kact                               | 5,491                                     | Out of AD            |
| carbonic anhydrase I inhibitor Ki                                 | 8,029                                     | Out of AD            |
| Carbonic anhydrase 2 activator Kact                               | 7,539                                     | In AD                |
| carbonic anhydrase II inhibitor Ki                                | 7,769                                     | Out of AD            |
| D(1A) dopamine receptor antagonist IC50                           | 4,978                                     | In AD                |
| D(1A) dopamine receptor antagonist Ki                             | 6,257                                     | In AD                |
| D3 dopamine receptor antagonist Ki                                | 5,998                                     | In AD                |
| delta-type opioid receptor antagonist Ki                          | 5,432                                     | Out of AD            |
| estrogen receptor antagonist IC50                                 | 5,703                                     | In AD                |
| estrogen receptor antagonist Ki                                   | 8,188                                     | In AD                |
| kappa-type opioid receptor antagonist Ki                          | 5,929                                     | Out of AD            |
| mu-type opioid receptor antagonist IC50                           | 4,777                                     | In AD                |
| mu-type opioid receptor antagonist Ki                             | 6,191                                     | Out of AD            |
| sodium- and chloride-dependent GABA transporter 1 antagonist IC50 | 4,603                                     | In AD                |
| sodium-dependent dopamine transporter antagonist IC50             | 6,015                                     | Out of AD            |
| sodium-dependent dopamine transporter antagonist Ki               | 5,647                                     | Out of AD            |
| sodium-dependent serotonin transporter antagonist IC50            | 5,615                                     | Out of AD            |
| sodium-dependent serotonin transporter antagonist Ki              | 5,789                                     | Out of AD            |

### The total number of anti–target(s): 8

in AD – compound falls in the applicability domain of the model

out of AD – compound is out of the applicability domain of the model

**Table S11.** Environmental ecotoxicity prediction for complexes **1–5** by GUSAR.

| <b>Complex 1</b>                           |                         |                             |
|--------------------------------------------|-------------------------|-----------------------------|
| <b>Activity</b>                            | <b>Prediction Value</b> | <b>Applicability Domain</b> |
| Bioaccumulation factor Log10(BCF)          | 1,172                   | In AD                       |
| Daphnia magna LC50 -Log10(mol/L)           | 5,091                   | In AD                       |
| Fathead Minnow LC50 Log10(mmol/L)          | -3,487                  | In AD                       |
| Tetrahymena pyriformis IGC50 -Log10(mol/L) | 1,265                   | In AD                       |
| <b>Complex 2</b>                           |                         |                             |
| <b>Activity</b>                            | <b>Prediction Value</b> | <b>Applicability Domain</b> |
| Bioaccumulation factor Log10(BCF)          | 1,568                   | In AD                       |
| Daphnia magna LC50 -Log10(mol/L)           | 5,274                   | In AD                       |
| Fathead Minnow LC50 Log10(mmol/L)          | -3,857                  | In AD                       |
| Tetrahymena pyriformis IGC50 -Log10(mol/L) | 1,790                   | In AD                       |
| <b>Complex 3</b>                           |                         |                             |
| <b>Activity</b>                            | <b>Prediction Value</b> | <b>Applicability Domain</b> |
| Bioaccumulation factor Log10(BCF)          | 2,231                   | In AD                       |
| Daphnia magna LC50 -Log10(mol/L)           | 5,084                   | In AD                       |
| Fathead Minnow LC50 Log10(mmol/L)          | -3,606                  | In AD                       |
| Tetrahymena pyriformis IGC50 -Log10(mol/L) | 1,985                   | In AD                       |
| <b>Complex 4</b>                           |                         |                             |
| <b>Activity</b>                            | <b>Prediction Value</b> | <b>Applicability Domain</b> |
| Bioaccumulation factor Log10(BCF)          | 0,000                   | 0,853                       |
| Daphnia magna LC50 -Log10(mol/L)           | 0,000                   | 0,853                       |
| Fathead Minnow LC50 Log10(mmol/L)          | 0,000                   | 0,853                       |
| Tetrahymena pyriformis IGC50 -Log10(mol/L) | 0,000                   | 0,853                       |
| <b>Complex 5</b>                           |                         |                             |
| <b>Activity</b>                            | <b>Prediction Value</b> | <b>Applicability Domain</b> |
| Bioaccumulation factor Log10(BCF)          | 1,095                   | In AD                       |
| Daphnia magna LC50 -Log10(mol/L)           | 4,243                   | In AD                       |
| Fathead Minnow LC50 Log10(mmol/L)          | -2,169                  | In AD                       |
| Tetrahymena pyriformis IGC50 -Log10(mol/L) | 0,869                   | In AD                       |

in AD – compound falls in the applicability domain of the model

out of AD – compound is out of the applicability domain of the model

**Table S12.** CLC–Pred: *in silico* prediction of cytotoxicity for tumor and non-tumor cell lines (results for  $P_a > 0.3$ ,  $P_a > 0.5$ , and  $P_a > P_i$ ).  $P_a$ : probability “to be active”,  $P_i$ : probability “to be inactive”.

## Complex 1

### Cancer cell line prediction result

#### $P_a > 0.3$

| $P_a$ | $P_i$ | Cell-line         | Cell-line full name                                   | Tissue  | Tumor type     |
|-------|-------|-------------------|-------------------------------------------------------|---------|----------------|
| 0.474 | 0.027 | <u>HepG2</u>      | Hepatoblastoma                                        | Liver   | Hepatoblastoma |
| 0.475 | 0.037 | <u>HT-29</u>      | Colon adenocarcinoma                                  | Colon   | Adenocarcinoma |
| 0.474 | 0.070 | <u>Hs 683</u>     | Oligodendroglioma                                     | Brain   | Glioma         |
| 0.464 | 0.073 | <u>NCI-H838</u>   | Non-small cell lung cancer. 3 stage                   | Lung    | Carcinoma      |
| 0.360 | 0.043 | <u>HOP-18</u>     | Non-small cell lung carcinoma                         | Lung    | Carcinoma      |
| 0.321 | 0.034 | <u>MKN-7</u>      | Gastric carcinoma                                     | Stomach | Carcinoma      |
| 0.402 | 0.132 | <u>DMS-114</u>    | Lung carcinoma                                        | Lung    | Carcinoma      |
| 0.387 | 0.122 | <u>MDA-MB-453</u> | Breast adenocarcinoma                                 | Breast  | Adenocarcinoma |
| 0.319 | 0.075 | <u>T98G</u>       | Glioblastoma                                          | Brain   | Carcinoma      |
| 0.307 | 0.076 | <u>8505C</u>      | Thyroid gland undifferentiated (anaplastic) carcinoma | Thyroid | Carcinoma      |
| 0.306 | 0.275 | <u>SK-MEL-1</u>   | Metastatic melanoma                                   | Skin    | Melanoma       |

#### $P_a > P_i$

| $P_a$ | $P_i$ | Cell-line         | Cell-line full name                                   | Tissue                             | Tumor type     |
|-------|-------|-------------------|-------------------------------------------------------|------------------------------------|----------------|
| 0.474 | 0.027 | <u>HepG2</u>      | Hepatoblastoma                                        | Liver                              | Hepatoblastoma |
| 0.475 | 0.037 | <u>HT-29</u>      | Colon adenocarcinoma                                  | Colon                              | Adenocarcinoma |
| 0.474 | 0.070 | <u>Hs 683</u>     | Oligodendroglioma                                     | Brain                              | Glioma         |
| 0.464 | 0.073 | <u>NCI-H838</u>   | Non-small cell lung cancer. 3 stage                   | Lung                               | Carcinoma      |
| 0.360 | 0.043 | <u>HOP-18</u>     | Non-small cell lung carcinoma                         | Lung                               | Carcinoma      |
| 0.321 | 0.034 | <u>MKN-7</u>      | Gastric carcinoma                                     | Stomach                            | Carcinoma      |
| 0.402 | 0.132 | <u>DMS-114</u>    | Lung carcinoma                                        | Lung                               | Carcinoma      |
| 0.387 | 0.122 | <u>MDA-MB-453</u> | Breast adenocarcinoma                                 | Breast                             | Adenocarcinoma |
| 0.319 | 0.075 | <u>T98G</u>       | Glioblastoma                                          | Brain                              | Carcinoma      |
| 0.307 | 0.076 | <u>8505C</u>      | Thyroid gland undifferentiated (anaplastic) carcinoma | Thyroid                            | Carcinoma      |
| 0.222 | 0.011 | <u>U-937/GTB</u>  | Histiocytic lymphoma                                  | Blood                              | Lymphoma       |
| 0.204 | 0.004 | <u>SK-HEP1</u>    | Hepatocellular carcinoma                              | Liver                              | Carcinoma      |
| 0.277 | 0.094 | <u>H9</u>         | T-lymphoid                                            | Haematopoietic and lymphoid tissue | Leukemia       |
| 0.278 | 0.107 | <u>HOS</u>        | Osteosarcoma                                          | Bone                               | Sarcoma        |
| 0.173 | 0.003 | <u>MEXF276L</u>   | Xenograft melanoma                                    | Skin                               | Melanoma       |
| 0.173 | 0.003 | <u>MEXF989</u>    | Xenograft melanoma                                    | Skin                               | Melanoma       |
| 0.173 | 0.003 | <u>PAXF546</u>    | Pancreatic carcinoma                                  | Pancreas                           | Carcinoma      |
| 0.190 | 0.045 | <u>ADR5000</u>    | Childhood T acute lymphoblastic leukemia              | Blood                              | Leukemia       |

|       |       |                       |                                          |                                    |                |
|-------|-------|-----------------------|------------------------------------------|------------------------------------|----------------|
| 0.225 | 0.111 | <u>MDA-MB-361</u>     | Breast adenocarcinoma                    | Breast                             | Adenocarcinoma |
| 0.247 | 0.141 | <u>PC-6</u>           | Small cell lung carcinoma                | Lung                               | Carcinoma      |
| 0.096 | 0.003 | <u>H322</u>           | Lung carcinoma                           | Lung                               | Carcinoma      |
| 0.150 | 0.069 | <u>DLD-1</u>          | Colon adenocarcinoma                     | Colon                              | Adenocarcinoma |
| 0.184 | 0.108 | <u>St-4</u>           | Stomach carcinoma                        | Stomach                            | Carcinoma      |
| 0.207 | 0.133 | <u>Raji</u>           | B-lymphoblastic cells                    | Haematopoietic and lymphoid tissue | Leukemia       |
| 0.204 | 0.132 | <u>M19-MEL</u>        | Melanoma                                 | Skin                               | Melanoma       |
| 0.159 | 0.089 | <u>SHP77</u>          | Small cell lung carcinoma                | Lung                               | Carcinoma      |
| 0.271 | 0.203 | <u>A2058</u>          | Melanoma                                 | Skin                               | Melanoma       |
| 0.168 | 0.101 | <u>Caco-2</u>         | Colon adenocarcinoma                     | Colon                              | Adenocarcinoma |
| 0.084 | 0.019 | <u>UMSCC22B</u>       | Hypopharyngeal squamous cell carcinoma   | Upper aerodigestive tract          | Carcinoma      |
| 0.104 | 0.044 | <u>SQ20B</u>          | Head and neck Squamous carcinoma         | Head and neck                      | Carcinoma      |
| 0.065 | 0.006 | <u>UCLA P-3</u>       | Lung carcinoma cell line                 | Lung                               | Carcinoma      |
| 0.082 | 0.028 | <u>FaDu</u>           | Hypopharyngeal squamous carcinoma        | Upper aerodigestive tract          | Carcinoma      |
| 0.065 | 0.019 | <u>UMUC3</u>          | Bladder Carcinoma                        | Urinary tract                      | Carcinoma      |
| 0.132 | 0.089 | <u>Caov-3</u>         | High grade ovarian serous adenocarcinoma | Ovarium                            | Adenocarcinoma |
| 0.277 | 0.245 | <u>CFPAC-1</u>        | Pancreatic carcinoma                     | Pancreas                           | Carcinoma      |
| 0.306 | 0.275 | <u>SK-MEL-1</u>       | Metastatic melanoma                      | Skin                               | Melanoma       |
| 0.096 | 0.064 | <u>COLO 320</u>       | Colon adenocarcinoma                     | Colon                              | Adenocarcinoma |
| 0.185 | 0.154 | <u>HeLa</u>           | Cervical adenocarcinoma                  | Cervix                             | Adenocarcinoma |
| 0.027 | 0.003 | <u>OVXF1023</u>       | Ovarian adenocarcinoma                   | Ovarium                            | Adenocarcinoma |
| 0.027 | 0.003 | <u>OVXF1353</u>       | Ovarian adenocarcinoma                   | Ovarium                            | Adenocarcinoma |
| 0.027 | 0.003 | <u>RXF 423</u>        | Renal carcinoma                          | Kidney                             | Carcinoma      |
| 0.055 | 0.032 | <u>Leukemia cells</u> | Leukemia                                 | Blood                              | Leukemia       |
| 0.224 | 0.213 | <u>NCI-H1299</u>      | Non-small cell lung carcinoma            | Lung                               | Carcinoma      |
| 0.015 | 0.004 | <u>SW-60</u>          | Colorectal carcinoma                     | Colon                              | Carcinoma      |
| 0.286 | 0.285 | <u>NALM-6</u>         | Adult B acute lymphoblastic leukemia     | Haematopoietic and lymphoid tissue | Leukemia       |
| 0.020 | 0.019 | <u>NT2</u>            | Embryonal carcinoma                      | Germ cell. fibroblast              | Carcinoma      |
| 0.017 | 0.016 | <u>NCH82</u>          | Glioblastoma                             | Brain                              | Glioblastoma   |

### Non-tumor cell line prediction result

**Pa > 0.3**

| Pa    | Pi    | Cell-line         | Cell-line full name       | Tissue |
|-------|-------|-------------------|---------------------------|--------|
| 0.395 | 0.036 | <u>WI-38 VA13</u> | Embryonic lung fibroblast | Lung   |

**Pa > Pi**

| Pa    | Pi    | Cell-line         | Cell-line full name       | Tissue |
|-------|-------|-------------------|---------------------------|--------|
| 0.395 | 0.036 | <u>WI-38 VA13</u> | Embryonic lung fibroblast | Lung   |

|       |       |               |                                 |             |
|-------|-------|---------------|---------------------------------|-------------|
| 0.277 | 0.008 | <u>NHDF</u>   | Fibroblast                      | Skin        |
| 0.223 | 0.004 | <u>IMR-90</u> | Embryonic lung fibroblast       | Lung        |
| 0.271 | 0.069 | <u>MRC5</u>   | Embryonic lung fibroblast       | Lung        |
| 0.188 | 0.024 | <u>PrEC</u>   | Prostate epithelial cell        | Prostate    |
| 0.110 | 0.058 | <u>WI-38</u>  | Embryonic lung fibroblast       | Lung        |
| 0.029 | 0.009 | <u>HASMC</u>  | Aortic smooth muscle            | Muscle      |
| 0.090 | 0.089 | <u>HUVEC</u>  | Umbilical vein endothelial cell | Endothelium |

## Complex 2

### Cancer cell line prediction result

**Pa > 0.5**

| Pa    | Pi    | Cell-line     | Cell-line full name | Tissue | Tumor type |
|-------|-------|---------------|---------------------|--------|------------|
| 0.603 | 0.025 | <u>Hs 683</u> | Oligodendroglioma   | Brain  | Glioma     |

**Pa > Pi**

| Pa    | Pi    | Cell-line       | Cell-line full name                      | Tissue                             | Tumor type     |
|-------|-------|-----------------|------------------------------------------|------------------------------------|----------------|
| 0.603 | 0.025 | <u>Hs 683</u>   | Oligodendroglioma                        | Brain                              | Glioma         |
| 0.404 | 0.029 | <u>HOP-18</u>   | Non-small cell lung carcinoma            | Lung                               | Carcinoma      |
| 0.338 | 0.026 | <u>MKN-7</u>    | Gastric carcinoma                        | Stomach                            | Carcinoma      |
| 0.346 | 0.037 | <u>SF-295</u>   | Glioblastoma                             | Brain                              | Glioblastoma   |
| 0.268 | 0.028 | <u>Jurkat</u>   | Acute leukemic T-cells                   | Blood                              | Leukemia       |
| 0.381 | 0.152 | <u>NCI-H838</u> | Non-small cell lung cancer. 3 stage      | Lung                               | Carcinoma      |
| 0.178 | 0.003 | <u>MEXF276L</u> | Xenograft melanoma                       | Skin                               | Melanoma       |
| 0.178 | 0.003 | <u>MEXF989</u>  | Xenograft melanoma                       | Skin                               | Melanoma       |
| 0.178 | 0.003 | <u>PAXF546</u>  | Pancreatic carcinoma                     | Pancreas                           | Carcinoma      |
| 0.173 | 0.005 | <u>MOLT-3</u>   | T-lymphoblastic leukemia                 | Blood                              | Leukemia       |
| 0.167 | 0.016 | <u>COLO 320</u> | Colon adenocarcinoma                     | Colon                              | Adenocarcinoma |
| 0.194 | 0.043 | <u>ADR5000</u>  | Childhood T acute lymphoblastic leukemia | Blood                              | Leukemia       |
| 0.320 | 0.176 | <u>NCI-H187</u> | Small cell lung carcinoma                | Lung                               | Carcinoma      |
| 0.206 | 0.072 | <u>St-4</u>     | Stomach carcinoma                        | Stomach                            | Carcinoma      |
| 0.139 | 0.007 | <u>Bcap37</u>   | Breast adenocarcinoma                    | Breast                             | Adenocarcinoma |
| 0.255 | 0.132 | <u>PC-6</u>     | Small cell lung carcinoma                | Lung                               | Carcinoma      |
| 0.146 | 0.030 | <u>HCT-8</u>    | Ileocecal adenocarcinoma                 | Large intestine                    | Adenocarcinoma |
| 0.114 | 0.009 | <u>UMSCC22B</u> | Hypopharyngeal squamous cell carcinoma   | Upper aerodigestive tract          | Carcinoma      |
| 0.209 | 0.132 | <u>HL-60</u>    | Promyeloblast leukemia                   | Haematopoietic and lymphoid tissue | Leukemia       |
| 0.111 | 0.050 | <u>MES-SA</u>   | Uterine corpus sarcoma                   | Uterus                             | Sarcoma        |
| 0.063 | 0.004 | <u>H322</u>     | Lung carcinoma                           | Lung                               | Carcinoma      |
| 0.063 | 0.007 | <u>UCLA P-3</u> | Lung carcinoma cell line                 | Lung                               | Carcinoma      |
| 0.218 | 0.177 | <u>LS174T</u>   | Colon adencocarcinoma                    | Colon                              | Adenocarcinoma |

|       |       |                       |                                                       |                           |                |
|-------|-------|-----------------------|-------------------------------------------------------|---------------------------|----------------|
| 0.062 | 0.023 | <u>Leukemia cells</u> | Leukemia                                              | Blood                     | Leukemia       |
| 0.062 | 0.024 | <u>UMUC3</u>          | Bladder Carcinoma                                     | Urinary tract             | Carcinoma      |
| 0.209 | 0.180 | <u>KM12</u>           | Colon adenocarcinoma                                  | Colon                     | Adenocarcinoma |
| 0.036 | 0.009 | <u>KKLS</u>           | Gastric adenocarcinoma                                | Stomach                   | Adenocarcinoma |
| 0.238 | 0.212 | <u>8505C</u>          | Thyroid gland undifferentiated (anaplastic) carcinoma | Thyroid                   | Carcinoma      |
| 0.071 | 0.046 | <u>FaDu</u>           | Hypopharyngeal squamous carcinoma                     | Upper aerodigestive tract | Carcinoma      |
| 0.027 | 0.003 | <u>OVXF1023</u>       | Ovarian adenocarcinoma                                | Ovary                     | Adenocarcinoma |
| 0.027 | 0.003 | <u>OVXF1353</u>       | Ovarian adenocarcinoma                                | Ovary                     | Adenocarcinoma |
| 0.027 | 0.003 | <u>RXF 423</u>        | Renal carcinoma                                       | Kidney                    | Carcinoma      |
| 0.069 | 0.047 | <u>SISO</u>           | Uterine cervical adenocarcinoma                       | Cervix                    | Adenocarcinoma |
| 0.025 | 0.005 | <u>NCI-H46</u>        | Lung carcinoma                                        | Lung                      | Carcinoma      |
| 0.022 | 0.003 | <u>SW-60</u>          | Colorectal carcinoma                                  | Colon                     | Carcinoma      |
| 0.031 | 0.014 | <u>GLC4</u>           |                                                       |                           |                |
| 0.030 | 0.017 | <u>SNB-7</u>          | Glioblastoma                                          | Brain                     | Glioblastoma   |
| 0.017 | 0.007 | <u>SPC-A4</u>         | Lung Adenocarcinoma                                   | Lung                      | Adenocarcinoma |
| 0.062 | 0.053 | <u>SK-ES1</u>         | Ewing sarcoma                                         | Bone                      | Sarcoma        |
| 0.016 | 0.011 | <u>ST-KM-1</u>        | Gastric carcinoma                                     | Stomach                   | Carcinoma      |

### Non-tumor cell line prediction result

$P_a > P_i$

| $P_a$ | $P_i$ | Cell-line         | Cell-line full name               | Tissue                          |
|-------|-------|-------------------|-----------------------------------|---------------------------------|
| 0.499 | 0.022 | <u>WI-38 VA13</u> | Embryonic lung fibroblast         | Lung                            |
| 0.336 | 0.005 | <u>PBMC</u>       | Peripheral blood mononuclear cell | Blood                           |
| 0.205 | 0.005 | <u>IMR-90</u>     | Embryonic lung fibroblast         | Lung                            |
| 0.189 | 0.023 | <u>PrEC</u>       | Prostate epithelial cell          | Prostate                        |
| 0.191 | 0.048 | <u>NHDF</u>       | Fibroblast                        | Skin                            |
| 0.205 | 0.118 | <u>MRC5</u>       | Embryonic lung fibroblast         | Lung                            |
| 0.082 | 0.026 | <u>WIL2-NS</u>    | Lymphoblastoid cell               | Haematopoietic, lymphoid tissue |
| 0.047 | 0.005 | <u>TERT-RPE1</u>  | Retinal pigmented epithelial cell | Retina                          |
| 0.099 | 0.085 | <u>WI-38</u>      | Embryonic lung fibroblast         | Lung                            |
| 0.023 | 0.019 | <u>HASMC</u>      | Aortic smooth muscle              | Muscle                          |

### Complex 3

#### Cancer cell line prediction result

$P_a > 0.5$

| $P_a$ | $P_i$ | Cell-line     | Cell-line full name | Tissue | Tumor type |
|-------|-------|---------------|---------------------|--------|------------|
| 0.645 | 0.017 | <u>Hs 683</u> | Oligodendroglioma   | Brain  | Glioma     |

|       |       |                 |                           |      |           |
|-------|-------|-----------------|---------------------------|------|-----------|
| 0.516 | 0.012 | <u>NCI-H187</u> | Small cell lung carcinoma | Lung | Carcinoma |
|-------|-------|-----------------|---------------------------|------|-----------|

**Pa > Pi**

| Pa    | Pi    | Cell-line             | Cell-line full name                                   | Tissue                    | Tumor type     |
|-------|-------|-----------------------|-------------------------------------------------------|---------------------------|----------------|
| 0.645 | 0.017 | <u>Hs 683</u>         | Oligodendroglioma                                     | Brain                     | Glioma         |
| 0.516 | 0.012 | <u>NCI-H187</u>       | Small cell lung carcinoma                             | Lung                      | Carcinoma      |
| 0.438 | 0.021 | <u>HOP-18</u>         | Non-small cell lung carcinoma                         | Lung                      | Carcinoma      |
| 0.330 | 0.030 | <u>MKN-7</u>          | Gastric carcinoma                                     | Stomach                   | Carcinoma      |
| 0.295 | 0.063 | <u>HepG2</u>          | Hepatoblastoma                                        | Liver                     | Hepatoblastoma |
| 0.381 | 0.152 | <u>NCI-H838</u>       | Non-small cell lung cancer. 3 stage                   | Lung                      | Carcinoma      |
| 0.189 | 0.011 | <u>COLO 320</u>       | Colon adenocarcinoma                                  | Colon                     | Adenocarcinoma |
| 0.178 | 0.003 | <u>MEXF276L</u>       | Xenograft melanoma                                    | Skin                      | Melanoma       |
| 0.178 | 0.003 | <u>MEXF989</u>        | Xenograft melanoma                                    | Skin                      | Melanoma       |
| 0.178 | 0.003 | <u>PAXF546</u>        | Pancreatic carcinoma                                  | Pancreas                  | Carcinoma      |
| 0.194 | 0.043 | <u>ADR5000</u>        | Childhood T acute lymphoblastic leukemia              | Blood                     | Leukemia       |
| 0.255 | 0.132 | <u>PC-6</u>           | Small cell lung carcinoma                             | Lung                      | Carcinoma      |
| 0.190 | 0.097 | <u>St-4</u>           | Stomach carcinoma                                     | Stomach                   | Carcinoma      |
| 0.253 | 0.169 | <u>8505C</u>          | Thyroid gland undifferentiated (anaplastic) carcinoma | Thyroid                   | Carcinoma      |
| 0.092 | 0.015 | <u>UMSCC22B</u>       | Hypopharyngeal squamous cell carcinoma                | Upper aerodigestive tract | Carcinoma      |
| 0.227 | 0.154 | <u>LS174T</u>         | Colon adenocarcinoma                                  | Colon                     | Adenocarcinoma |
| 0.063 | 0.004 | <u>H322</u>           | Lung carcinoma                                        | Lung                      | Carcinoma      |
| 0.063 | 0.007 | <u>UCLA P-3</u>       | Lung carcinoma cell line                              | Lung                      | Carcinoma      |
| 0.156 | 0.107 | <u>NUGC-3</u>         | Gastric carcinoma                                     | Stomach                   | Carcinoma      |
| 0.064 | 0.020 | <u>Leukemia cells</u> | Leukemia                                              | Blood                     | Leukemia       |
| 0.074 | 0.041 | <u>FaDu</u>           | Hypopharyngeal squamous carcinoma                     | Upper aerodigestive tract | Carcinoma      |
| 0.060 | 0.030 | <u>UMUC3</u>          | Bladder Carcinoma                                     | Urinary tract             | Carcinoma      |
| 0.071 | 0.041 | <u>SISO</u>           | Uterine cervical adenocarcinoma                       | Cervix                    | Adenocarcinoma |
| 0.036 | 0.009 | <u>KKLS</u>           | Gastric adenocarcinoma                                | Stomach                   | Adenocarcinoma |
| 0.092 | 0.066 | <u>Bcap37</u>         | Breast adenocarcinoma                                 | Breast                    | Adenocarcinoma |
| 0.029 | 0.004 | <u>NCI-H46</u>        | Lung carcinoma                                        | Lung                      | Carcinoma      |
| 0.027 | 0.003 | <u>OVXF1023</u>       | Ovarian adenocarcinoma                                | Ovary                     | Adenocarcinoma |
| 0.027 | 0.003 | <u>OVXF1353</u>       | Ovarian adenocarcinoma                                | Ovary                     | Adenocarcinoma |
| 0.027 | 0.003 | <u>RXF 423</u>        | Renal carcinoma                                       | Kidney                    | Carcinoma      |
| 0.022 | 0.003 | <u>SW-60</u>          | Colorectal carcinoma                                  | Colon                     | Carcinoma      |
| 0.031 | 0.014 | <u>GLC4</u>           |                                                       |                           |                |
| 0.063 | 0.049 | <u>SW1353</u>         | Bone chondrosarcoma                                   | Bone                      | Sarcoma        |
| 0.023 | 0.010 | <u>NUGC</u>           | Gastric carcinoma                                     | Stomach                   | Carcinoma      |
| 0.030 | 0.017 | <u>SNB-7</u>          | Glioblastoma                                          | Brain                     | Glioblastoma   |
| 0.062 | 0.053 | <u>SK-ES1</u>         | Ewing sarcoma                                         | Bone                      | Sarcoma        |
| 0.059 | 0.052 | <u>HPAC</u>           | Pancreatic adenocarcinoma                             | Pancreas                  | Adenocarcinoma |
| 0.016 | 0.011 | <u>ST-KM-1</u>        | Gastric carcinoma                                     | Stomach                   | Carcinoma      |

**Non-tumor cell line prediction result**

**Pa > Pi**

| Pa    | Pi    | Cell-line         | Cell-line full name               | Tissue                          |
|-------|-------|-------------------|-----------------------------------|---------------------------------|
| 0.445 | 0.029 | <u>WI-38 VA13</u> | Embryonic lung fibroblast         | Lung                            |
| 0.196 | 0.008 | <u>IMR-90</u>     | Embryonic lung fibroblast         | Lung                            |
| 0.175 | 0.033 | <u>PrEC</u>       | Prostate epithelial cell          | Prostate                        |
| 0.152 | 0.087 | <u>NHDF</u>       | Fibroblast                        | Skin                            |
| 0.078 | 0.032 | <u>WIL2-NS</u>    | Lymphoblastoid cell               | Haematopoietic, lymphoid tissue |
| 0.044 | 0.007 | <u>TERT-RPE1</u>  | Retinal pigmented epithelial cell | Retina                          |
| 0.025 | 0.014 | <u>HASMC</u>      | Aortic smooth muscle              | Muscle                          |

**Complex 4****Cancer cell line prediction result****Pa > 0.5**

| Pa    | Pi    | Cell-line     | Cell-line full name | Tissue  | Tumor type |
|-------|-------|---------------|---------------------|---------|------------|
| 0.603 | 0.004 | <u>PA-1</u>   | Ovarian carcinoma   | Ovarium | Carcinoma  |
| 0.585 | 0.029 | <u>Hs 683</u> | Oligodendroglioma   | Brain   | Glioma     |

**Pa > Pi**

| Pa    | Pi    | Cell-line       | Cell-line full name                      | Tissue                             | Tumor type     |
|-------|-------|-----------------|------------------------------------------|------------------------------------|----------------|
| 0.603 | 0.004 | <u>PA-1</u>     | Ovarian carcinoma                        | Ovarium                            | Carcinoma      |
| 0.585 | 0.029 | <u>Hs 683</u>   | Oligodendroglioma                        | Brain                              | Glioma         |
| 0.427 | 0.009 | <u>DLD-1</u>    | Colon adenocarcinoma                     | Colon                              | Adenocarcinoma |
| 0.420 | 0.042 | <u>HL-60</u>    | Promyeloblast leukemia                   | Haematopoietic and lymphoid tissue | Leukemia       |
| 0.363 | 0.018 | <u>MKN-7</u>    | Gastric carcinoma                        | Stomach                            | Carcinoma      |
| 0.343 | 0.014 | <u>C8166</u>    | Leukemic T-cells                         | Blood                              | Leukemia       |
| 0.352 | 0.047 | <u>HOP-18</u>   | Non-small cell lung carcinoma            | Lung                               | Carcinoma      |
| 0.302 | 0.072 | <u>UO-31</u>    | Renal carcinoma                          | Kidney                             | Carcinoma      |
| 0.241 | 0.031 | <u>St-4</u>     | Stomach carcinoma                        | Stomach                            | Carcinoma      |
| 0.360 | 0.178 | <u>NCI-H838</u> | Non-small cell lung cancer. 3 stage      | Lung                               | Carcinoma      |
| 0.156 | 0.004 | <u>MEXF276L</u> | Xenograft melanoma                       | Skin                               | Melanoma       |
| 0.156 | 0.004 | <u>MEXF989</u>  | Xenograft melanoma                       | Skin                               | Melanoma       |
| 0.156 | 0.004 | <u>PAXF546</u>  | Pancreatic carcinoma                     | Pancreas                           | Carcinoma      |
| 0.360 | 0.210 | <u>DMS-114</u>  | Lung carcinoma                           | Lung                               | Carcinoma      |
| 0.249 | 0.130 | <u>Hs-578T</u>  | Invasive ductal breast carcinoma         | Breast                             | Carcinoma      |
| 0.142 | 0.025 | <u>COLO 320</u> | Colon adenocarcinoma                     | Colon                              | Adenocarcinoma |
| 0.169 | 0.063 | <u>ADR5000</u>  | Childhood T acute lymphoblastic leukemia | Blood                              | Leukemia       |
| 0.118 | 0.024 | <u>SiHa</u>     | Cervical squamous cell                   | Cervix                             | Carcinoma      |

|       |       |                       |                                                       |                           |                |
|-------|-------|-----------------------|-------------------------------------------------------|---------------------------|----------------|
|       |       |                       | carcinoma                                             |                           |                |
| 0.166 | 0.104 | <u>Caco-2</u>         | Colon adenocarcinoma                                  | Colon                     | Adenocarcinoma |
| 0.246 | 0.190 | <u>8505C</u>          | Thyroid gland undifferentiated (anaplastic) carcinoma | Thyroid                   | Carcinoma      |
| 0.072 | 0.028 | <u>UMSCC22B</u>       | Hypopharyngeal squamous cell carcinoma                | Upper aerodigestive tract | Carcinoma      |
| 0.049 | 0.006 | <u>H322</u>           | Lung carcinoma                                        | Lung                      | Carcinoma      |
| 0.092 | 0.050 | <u>ZR-75-1</u>        | Breast carcinoma                                      | Breast                    | Carcinoma      |
| 0.062 | 0.023 | <u>Leukemia cells</u> | Leukemia                                              | Blood                     | Leukemia       |
| 0.051 | 0.014 | <u>UCLA P-3</u>       | Lung carcinoma cell line                              | Lung                      | Carcinoma      |
| 0.035 | 0.010 | <u>KKLS</u>           | Gastric adenocarcinoma                                | Stomach                   | Adenocarcinoma |
| 0.070 | 0.049 | <u>FaDu</u>           | Hypopharyngeal squamous carcinoma                     | Upper aerodigestive tract | Carcinoma      |
| 0.021 | 0.004 | <u>OVXF1023</u>       | Ovarian adenocarcinoma                                | Ovarium                   | Adenocarcinoma |
| 0.021 | 0.004 | <u>OVXF1353</u>       | Ovarian adenocarcinoma                                | Ovarium                   | Adenocarcinoma |
| 0.021 | 0.004 | <u>RXF 423</u>        | Renal carcinoma                                       | Kidney                    | Carcinoma      |
| 0.017 | 0.004 | <u>SW-60</u>          | Colorectal carcinoma                                  | Colon                     | Carcinoma      |
| 0.019 | 0.011 | <u>NCI-H46</u>        | Lung carcinoma                                        | Lung                      | Carcinoma      |
| 0.177 | 0.170 | <u>SF-295</u>         | Glioblastoma                                          | Brain                     | Glioblastoma   |
| 0.024 | 0.022 | <u>GLC4</u>           |                                                       |                           |                |

## Non-tumor cell line prediction result

$P_a > P_i$

| $P_a$ | $P_i$ | Cell-line         | Cell-line full name               | Tissue   |
|-------|-------|-------------------|-----------------------------------|----------|
| 0.309 | 0.053 | <u>WI-38 VA13</u> | Embryonic lung fibroblast         | Lung     |
| 0.212 | 0.010 | <u>PBMC</u>       | Peripheral blood mononuclear cell | Blood    |
| 0.173 | 0.027 | <u>IMR-90</u>     | Embryonic lung fibroblast         | Lung     |
| 0.143 | 0.078 | <u>PrEC</u>       | Prostate epithelial cell          | Prostate |
| 0.036 | 0.019 | <u>TERT-RPE1</u>  | Retinal pigmented epithelial cell | Retina   |

## Complex 5

### Cancer cell line prediction result

$P_a > 0.5$

| $P_a$ | $P_i$ | Cell-line       | Cell-line full name                 | Tissue | Tumor type |
|-------|-------|-----------------|-------------------------------------|--------|------------|
| 0.601 | 0.020 | <u>NCI-H838</u> | Non-small cell lung cancer. 3 stage | Lung   | Carcinoma  |
| 0.572 | 0.033 | <u>Hs 683</u>   | Oligodendroglioma                   | Brain  | Glioma     |
| 0.536 | 0.044 | <u>MCF7</u>     | Breast carcinoma                    | Breast | Carcinoma  |
| 0.507 | 0.060 | <u>A549</u>     | Lung carcinoma                      | Lung   | Carcinoma  |

$P_a > P_i$

| Pa    | Pi    | Cell-line         | Cell-line full name                                   | Tissue                             | Tumor type     |
|-------|-------|-------------------|-------------------------------------------------------|------------------------------------|----------------|
| 0.601 | 0.020 | <u>NCI-H838</u>   | Non-small cell lung cancer. 3 stage                   | Lung                               | Carcinoma      |
| 0.572 | 0.033 | <u>Hs 683</u>     | Oligodendroglioma                                     | Brain                              | Glioma         |
| 0.536 | 0.044 | <u>MCF7</u>       | Breast carcinoma                                      | Breast                             | Carcinoma      |
| 0.474 | 0.014 | <u>HOP-18</u>     | Non-small cell lung carcinoma                         | Lung                               | Carcinoma      |
| 0.507 | 0.060 | <u>A549</u>       | Lung carcinoma                                        | Lung                               | Carcinoma      |
| 0.469 | 0.023 | <u>NCI-H187</u>   | Small cell lung carcinoma                             | Lung                               | Carcinoma      |
| 0.483 | 0.038 | <u>SK-MEL-1</u>   | Metastatic melanoma                                   | Skin                               | Melanoma       |
| 0.466 | 0.057 | <u>DMS-114</u>    | Lung carcinoma                                        | Lung                               | Carcinoma      |
| 0.414 | 0.020 | <u>NALM-6</u>     | Adult B acute lymphoblastic leukemia                  | Haematopoietic and lymphoid tissue | Leukemia       |
| 0.430 | 0.038 | <u>A2058</u>      | Melanoma                                              | Skin                               | Melanoma       |
| 0.395 | 0.013 | <u>DLD-1</u>      | Colon adenocarcinoma                                  | Colon                              | Adenocarcinoma |
| 0.416 | 0.035 | <u>CFPAC-1</u>    | Pancreatic carcinoma                                  | Pancreas                           | Carcinoma      |
| 0.379 | 0.014 | <u>MKN-7</u>      | Gastric carcinoma                                     | Stomach                            | Carcinoma      |
| 0.363 | 0.023 | <u>8505C</u>      | Thyroid gland undifferentiated (anaplastic) carcinoma | Thyroid                            | Carcinoma      |
| 0.359 | 0.029 | <u>H9</u>         | T-lymphoid                                            | Haematopoietic and lymphoid tissue | Leukemia       |
| 0.407 | 0.083 | <u>MDA-MB-453</u> | Breast adenocarcinoma                                 | Breast                             | Adenocarcinoma |
| 0.365 | 0.043 | <u>M19-MEL</u>    | Melanoma                                              | Skin                               | Melanoma       |
| 0.356 | 0.056 | <u>PC-6</u>       | Small cell lung carcinoma                             | Lung                               | Carcinoma      |
| 0.388 | 0.117 | <u>YAPC</u>       | Pancreatic carcinoma                                  | Pancreas                           | Carcinoma      |
| 0.378 | 0.113 | <u>Kasumi 1</u>   | Childhood acute myeloid leukemia with maturation      | Haematopoietic and lymphoid tissue | Leukemia       |
| 0.326 | 0.063 | <u>T98G</u>       | Glioblastoma                                          | Brain                              | Carcinoma      |
| 0.289 | 0.028 | <u>Raji</u>       | B-lymphoblastic cells                                 | Haematopoietic and lymphoid tissue | Leukemia       |
| 0.273 | 0.037 | <u>A2780</u>      | Ovarian carcinoma                                     | Ovary                              | Carcinoma      |
| 0.278 | 0.043 | <u>PANC-1</u>     | Pancreatic carcinoma                                  | Pancreas                           | Carcinoma      |
| 0.305 | 0.073 | <u>SN12C</u>      | Renal carcinoma                                       | Kidney                             | Carcinoma      |
| 0.257 | 0.025 | <u>BGC-823</u>    | Stomach adenocarcinoma                                | Stomach                            | Adenocarcinoma |
| 0.248 | 0.020 | <u>ADR5000</u>    | Childhood T acute lymphoblastic leukemia              | Blood                              | Leukemia       |
| 0.286 | 0.064 | <u>CWR22R</u>     | Prostate carcinoma epithelial cell line               | Prostate                           | Carcinoma      |
| 0.316 | 0.097 | <u>SJSA-1</u>     | Osteosarcoma                                          | Bone                               | Sarcoma        |
| 0.202 | 0.009 | <u>COLO 320</u>   | Colon adenocarcinoma                                  | Colon                              | Adenocarcinoma |
| 0.208 | 0.023 | <u>SMMC-7721</u>  | Hepatocellular carcinoma                              | Liver                              | Carcinoma      |
| 0.262 | 0.078 | <u>LS174T</u>     | Colon adenocarcinoma                                  | Colon                              | Adenocarcinoma |
| 0.307 | 0.129 | <u>U-266</u>      | Plasma cell myeloma                                   | Blood                              | Myeloma        |
| 0.176 | 0.003 | <u>MEXF276L</u>   | Xenograft melanoma                                    | Skin                               | Melanoma       |
| 0.176 | 0.003 | <u>MEXF989</u>    | Xenograft melanoma                                    | Skin                               | Melanoma       |
| 0.176 | 0.003 | <u>PAXF546</u>    | Pancreatic carcinoma                                  | Pancreas                           | Carcinoma      |
| 0.197 | 0.025 | <u>SHP77</u>      | Small cell lung carcinoma                             | Lung                               | Carcinoma      |
| 0.218 | 0.056 | <u>St-4</u>       | Stomach carcinoma                                     | Stomach                            | Carcinoma      |
| 0.271 | 0.110 | <u>HuP-T3</u>     | Pancreatic adenocarcinoma                             | Pancreas                           | Adenocarcinoma |
| 0.183 | 0.028 | <u>LNCaP</u>      | Prostate carcinoma                                    | Prostate                           | Carcinoma      |
| 0.231 | 0.087 | <u>UACC-62</u>    | Melanoma                                              | Skin                               | Melanoma       |
| 0.275 | 0.133 | <u>OVCAR-5</u>    | Ovarian adenocarcinoma                                | Ovary                              | Adenocarcinoma |

|       |       |                       |                                          |                                    |                |
|-------|-------|-----------------------|------------------------------------------|------------------------------------|----------------|
| 0.208 | 0.080 | <u>Bel-7402</u>       | Hepatoma                                 | Liver                              | Hepatoma       |
| 0.292 | 0.169 | <u>RKO</u>            | Colon carcinoma                          | Colon                              | Carcinoma      |
| 0.147 | 0.031 | <u>RXF 944</u>        | Renal carcinoma                          | Kidney                             | Carcinoma      |
| 0.271 | 0.162 | <u>OVCAR-4</u>        | Ovarian adenocarcinoma                   | Ovary                              | Adenocarcinoma |
| 0.154 | 0.048 | <u>U-937</u>          | Histiocytic lymphoma                     | Haematopoietic and lymphoid tissue | Lymphoma       |
| 0.170 | 0.065 | <u>MAXF401</u>        | Breast carcinoma                         | Breast                             | Carcinoma      |
| 0.215 | 0.114 | <u>HOP-62</u>         | Non-small cell lung carcinoma            | Lung                               | Carcinoma      |
| 0.144 | 0.046 | <u>SK-BR-3</u>        | Breast adenocarcinoma                    | Breast                             | Adenocarcinoma |
| 0.175 | 0.078 | <u>SW1573</u>         | Lung carcinoma                           | Lung                               | Carcinoma      |
| 0.116 | 0.021 | <u>1A9</u>            | Ovarian adenocarcinoma                   | Ovary                              | Adenocarcinoma |
| 0.107 | 0.014 | <u>FaDu</u>           | Hypopharyngeal squamous carcinoma        | Upper aerodigestive tract          | Carcinoma      |
| 0.252 | 0.160 | <u>HOS</u>            | Osteosarcoma                             | Bone                               | Sarcoma        |
| 0.235 | 0.144 | <u>KARPAS-299</u>     | Anaplastic large cell lymphoma           | Haematopoietic and lymphoid tissue | Leukemia       |
| 0.238 | 0.154 | <u>Hs-578T</u>        | Invasive ductal breast carcinoma         | Breast                             | Carcinoma      |
| 0.085 | 0.004 | <u>UCLA P-3</u>       | Lung carcinoma cell line                 | Lung                               | Carcinoma      |
| 0.107 | 0.029 | <u>Bcap37</u>         | Breast adenocarcinoma                    | Breast                             | Adenocarcinoma |
| 0.232 | 0.157 | <u>UO-31</u>          | Renal carcinoma                          | Kidney                             | Carcinoma      |
| 0.186 | 0.112 | <u>SF-539</u>         | Glioblastoma                             | Brain                              | Glioblastoma   |
| 0.141 | 0.068 | <u>U-937/GTB</u>      | Histiocytic lymphoma                     | Blood                              | Lymphoma       |
| 0.098 | 0.026 | <u>SK-MEL</u>         | Melanoma                                 | Skin                               | Melanoma       |
| 0.221 | 0.154 | <u>PC-3</u>           | Prostate carcinoma                       | Prostate                           | Carcinoma      |
| 0.098 | 0.032 | <u>Lu1</u>            | Lung carcinoma                           | Lung                               | Carcinoma      |
| 0.201 | 0.135 | <u>HeLa</u>           | Cervical adenocarcinoma                  | Cervix                             | Adenocarcinoma |
| 0.216 | 0.157 | <u>SK-MEL-28</u>      | Melanoma                                 | Skin                               | Melanoma       |
| 0.102 | 0.046 | <u>ASPC1</u>          | Pancreatic ductal adenocarcinoma         | Pancreas                           | Adenocarcinoma |
| 0.097 | 0.044 | <u>ZR-75-1</u>        | Breast carcinoma                         | Breast                             | Carcinoma      |
| 0.069 | 0.016 | <u>Leukemia cells</u> | Leukemia                                 | Blood                              | Leukemia       |
| 0.265 | 0.212 | <u>PA-1</u>           | Ovarian carcinoma                        | Ovary                              | Carcinoma      |
| 0.113 | 0.061 | <u>SW480</u>          | Colon adenocarcinoma                     | Colon                              | Adenocarcinoma |
| 0.219 | 0.167 | <u>SF-268</u>         | Glioblastoma                             | Brain                              | Glioblastoma   |
| 0.206 | 0.155 | <u>MDA-MB-361</u>     | Breast adenocarcinoma                    | Breast                             | Adenocarcinoma |
| 0.072 | 0.022 | <u>SK-VLB</u>         | Ovarian carcinoma                        | Ovary                              | Carcinoma      |
| 0.071 | 0.022 | <u>L2987</u>          | Lung adenocarcinoma                      | Lung                               | Adenocarcinoma |
| 0.052 | 0.005 | <u>H322</u>           | Lung carcinoma                           | Lung                               | Carcinoma      |
| 0.255 | 0.210 | <u>SK-MES-1</u>       | Squamous cell lung carcinoma             | Lung                               | Carcinoma      |
| 0.048 | 0.007 | <u>GLC4</u>           |                                          |                                    |                |
| 0.131 | 0.092 | <u>Caov-3</u>         | High grade ovarian serous adenocarcinoma | Ovary                              | Adenocarcinoma |
| 0.061 | 0.026 | <u>UMUC3</u>          | Bladder Carcinoma                        | Urinary tract                      | Carcinoma      |
| 0.177 | 0.144 | <u>HT-1080</u>        | Fibrosarcoma                             | Soft tissue                        | Sarcoma        |
| 0.073 | 0.041 | <u>MCF7S</u>          | Breast carcinoma                         | Breast                             | Carcinoma      |
| 0.026 | 0.003 | <u>SW-60</u>          | Colorectal carcinoma                     | Colon                              | Carcinoma      |
| 0.211 | 0.187 | <u>NCI-H226</u>       | Non-small cell lung carcinoma            | Lung                               | Carcinoma      |
| 0.026 | 0.005 | <u>NCI-H46</u>        | Lung carcinoma                           | Lung                               | Carcinoma      |
| 0.032 | 0.011 | <u>KKLS</u>           | Gastric adenocarcinoma                   | Stomach                            | Adenocarcinoma |

|       |       |                   |                                                       |                           |                |
|-------|-------|-------------------|-------------------------------------------------------|---------------------------|----------------|
| 0.204 | 0.186 | <u>OVCAR-8</u>    | Ovarian adenocarcinoma                                | Ovary                     | Adenocarcinoma |
| 0.021 | 0.004 | <u>OVXF1023</u>   | Ovarian adenocarcinoma                                | Ovary                     | Adenocarcinoma |
| 0.021 | 0.004 | <u>OVXF1353</u>   | Ovarian adenocarcinoma                                | Ovary                     | Adenocarcinoma |
| 0.021 | 0.004 | <u>RXF 423</u>    | Renal carcinoma                                       | Kidney                    | Carcinoma      |
| 0.091 | 0.075 | <u>SiHa</u>       | Cervical squamous cell carcinoma                      | Cervix                    | Carcinoma      |
| 0.078 | 0.062 | <u>Col2</u>       | Colon carcinoma                                       | Colon                     | Carcinoma      |
| 0.237 | 0.224 | <u>UACC-257</u>   | Melanoma                                              | Skin                      | Melanoma       |
| 0.037 | 0.024 | <u>1A9/ptx-10</u> | Ovarian adenocarcinoma                                | Ovary                     | Adenocarcinoma |
| 0.122 | 0.111 | <u>LXFL 529</u>   | Non-small cell lung carcinoma                         | Lung                      | Carcinoma      |
| 0.150 | 0.140 | <u>Caco-2</u>     | Colon adenocarcinoma                                  | Colon                     | Adenocarcinoma |
| 0.091 | 0.082 | <u>HCT-8</u>      | Ileocecal adenocarcinoma                              | Large intestine           | Adenocarcinoma |
| 0.057 | 0.050 | <u>UMSCC22B</u>   | Hypopharyngeal squamous cell carcinoma                | Upper aerodigestive tract | Carcinoma      |
| 0.025 | 0.021 | <u>SNB-7</u>      | Glioblastoma                                          | Brain                     | Glioblastoma   |
| 0.014 | 0.013 | <u>ST-KM-1</u>    | Gastric carcinoma                                     | Stomach                   | Carcinoma      |
| 0.176 | 0.175 | <u>HCC 2998</u>   | Colon adenocarcinoma                                  | Colon                     | Adenocarcinoma |
| 0.016 | 0.015 | <u>SW-1736</u>    | Thyroid gland undifferentiated (anaplastic) carcinoma | Thyroid                   | Carcinoma      |
| 0.005 | 0.004 | <u>MOVP-3</u>     | Adult T acute lymphoblastic leukemia                  | Blood                     | Leukemia       |

## Non-tumor cell line prediction result

**Pa > Pi**

| Pa    | Pi    | Cell-line         | Cell-line full name                    | Tissue                          |
|-------|-------|-------------------|----------------------------------------|---------------------------------|
| 0.748 | 0.009 | <u>WI-38 VA13</u> | Embryonic lung fibroblast              | Lung                            |
| 0.262 | 0.047 | <u>BJ</u>         | Foreskin fibroblast                    | Foreskin                        |
| 0.223 | 0.025 | <u>NHDF</u>       | Fibroblast                             | Skin                            |
| 0.180 | 0.018 | <u>IMR-90</u>     | Embryonic lung fibroblast              | Lung                            |
| 0.232 | 0.100 | <u>MRC5</u>       | Embryonic lung fibroblast              | Lung                            |
| 0.164 | 0.041 | <u>HUVEC</u>      | Umbilical vein endothelial cell        | Endothelium                     |
| 0.177 | 0.088 | <u>HEL 299</u>    | Fibroblast                             | Lung                            |
| 0.140 | 0.085 | <u>PrEC</u>       | Prostate epithelial cell               | Prostate                        |
| 0.050 | 0.009 | <u>RPTEC</u>      | Renal proximal tubule epithelial cells | Kidney                          |
| 0.086 | 0.046 | <u>HaCaT</u>      | Keratinocyte                           | Skin                            |
| 0.073 | 0.044 | <u>WIL2-NS</u>    | Lymphoblastoid cell                    | Haematopoietic, lymphoid tissue |
| 0.039 | 0.014 | <u>TERT-RPE1</u>  | Retinal pigmented epithelial cell      | Retina                          |
| 0.029 | 0.009 | <u>HASMC</u>      | Aortic smooth muscle                   | Muscle                          |

**Table S13.** Sites of metabolism prediction (SOMP) for complexes **1–5** by GUSAR.**Complex 1**Meta-Pred Web Server prediction results of site of metabolism for enzyme **UGT**

| Atom Number | Rank | DeltaP |
|-------------|------|--------|
| 20          | 1    | 0,126  |
| 21          | 1    | 0,126  |
| 3           | 2    | -0,818 |
| 17          | 2    | -0,818 |
| 4           | 3    | -0,761 |
| 5           | 3    | -0,761 |
| 18          | 3    | -0,761 |
| 19          | 3    | -0,761 |
| 1           | 4    | -0,680 |
| 2           | 4    | -0,680 |
| 15          | 4    | -0,680 |
| 16          | 4    | -0,680 |
| 22          | 4    | -0,680 |
| 24          | 4    | -0,680 |
| 26          | 4    | -0,680 |
| 28          | 4    | -0,680 |
| 6           | 5    | -0,574 |
| 14          | 5    | -0,574 |
| 23          | 6    | -0,461 |
| 25          | 6    | -0,461 |
| 27          | 6    | -0,461 |
| 29          | 6    | -0,461 |
| 7           | 7    | -0,341 |
| 13          | 7    | -0,341 |
| 10          | 8    | -0,071 |
| 9           | 9    | -0,067 |
| 11          | 9    | -0,067 |
| 8           | 10   | -0,049 |
| 12          | 10   | -0,049 |

Meta-Pred Web Server prediction results of site of metabolism for enzyme **CYP3A4**

| Atom Number | Rank | DeltaP |
|-------------|------|--------|
| 22          | 1    | 0,917  |
| 24          | 1    | 0,917  |
| 26          | 1    | 0,917  |
| 28          | 1    | 0,917  |
| 7           | 2    | 0,287  |
| 13          | 2    | 0,287  |
| 3           | 3    | 0,172  |
| 17          | 3    | 0,172  |
| 4           | 4    | 0,155  |
| 18          | 4    | 0,155  |
| 10          | 5    | 0,083  |
| 1           | 6    | 0,027  |
| 15          | 6    | 0,027  |
| 23          | 7    | 0,013  |
| 25          | 7    | 0,013  |
| 27          | 7    | 0,013  |
| 29          | 7    | 0,013  |
| 20          | 8    | -0,536 |
| 21          | 8    | -0,536 |
| 2           | 9    | -0,447 |
| 16          | 9    | -0,447 |
| 9           | 10   | -0,336 |
| 11          | 10   | -0,336 |
| 6           | 11   | -0,239 |
| 14          | 11   | -0,239 |
| 5           | 12   | -0,161 |
| 19          | 12   | -0,161 |
| 8           | 13   | -0,128 |
| 12          | 13   | -0,128 |

Meta-Pred Web Server prediction results of site of metabolism for enzyme **CYP2D6**

| Atom Number | Rank | DeltaP |
|-------------|------|--------|
| 22          | 1    | 0,732  |
| 24          | 1    | 0,732  |
| 26          | 1    | 0,732  |
| 28          | 1    | 0,732  |
| 7           | 2    | 0,154  |
| 13          | 2    | 0,154  |
| 10          | 3    | 0,019  |
| 3           | 4    | 0,013  |
| 17          | 4    | 0,013  |
| 20          | 5    | -0,609 |
| 21          | 5    | -0,609 |
| 6           | 6    | -0,443 |
| 14          | 6    | -0,443 |
| 5           | 7    | -0,417 |
| 9           | 7    | -0,417 |
| 11          | 7    | -0,417 |
| 19          | 7    | -0,417 |
| 2           | 8    | -0,407 |
| 16          | 8    | -0,407 |
| 23          | 9    | -0,252 |
| 25          | 9    | -0,252 |
| 27          | 9    | -0,252 |
| 29          | 9    | -0,252 |
| 8           | 10   | -0,218 |
| 12          | 10   | -0,218 |
| 1           | 11   | -0,190 |
| 15          | 11   | -0,190 |
| 4           | 12   | -0,141 |
| 18          | 12   | -0,141 |

Meta-Pred Web Server prediction results of site of metabolism for enzyme **CYP2C9**

| Atom Number | Rank | DeltaP |
|-------------|------|--------|
| 22          | 1    | 0,748  |
| 24          | 1    | 0,748  |
| 26          | 1    | 0,748  |
| 28          | 1    | 0,748  |
| 20          | 2    | 0,604  |
| 21          | 2    | 0,604  |
| 7           | 3    | 0,233  |
| 13          | 3    | 0,233  |
| 10          | 4    | 0,184  |
| 23          | 5    | 0,050  |
| 25          | 5    | 0,050  |
| 27          | 5    | 0,050  |
| 29          | 5    | 0,050  |
| 6           | 6    | -0,431 |
| 14          | 6    | -0,431 |
| 2           | 7    | -0,361 |
| 16          | 7    | -0,361 |
| 5           | 8    | -0,294 |
| 19          | 8    | -0,294 |
| 9           | 9    | -0,252 |
| 11          | 9    | -0,252 |
| 1           | 10   | -0,119 |
| 15          | 10   | -0,119 |
| 4           | 11   | -0,107 |
| 18          | 11   | -0,107 |
| 3           | 12   | -0,032 |
| 17          | 12   | -0,032 |
| 8           | 13   | -0,028 |
| 12          | 13   | -0,028 |

Meta-Pred Web Server prediction results of site of metabolism for enzyme **CYP2C19**

| Atom Number | Rank | DeltaP |
|-------------|------|--------|
| 22          | 1    | 0,737  |
| 24          | 1    | 0,737  |
| 26          | 1    | 0,737  |
| 28          | 1    | 0,737  |
| 7           | 2    | 0,325  |
| 13          | 2    | 0,325  |
| 10          | 3    | 0,186  |
| 3           | 4    | 0,091  |
| 17          | 4    | 0,091  |
| 23          | 5    | 0,040  |
| 25          | 5    | 0,040  |
| 27          | 5    | 0,040  |
| 29          | 5    | 0,040  |
| 20          | 6    | -0,425 |
| 21          | 6    | -0,425 |
| 6           | 7    | -0,328 |
| 14          | 7    | -0,328 |
| 2           | 8    | -0,284 |
| 16          | 8    | -0,284 |
| 9           | 9    | -0,235 |
| 11          | 9    | -0,235 |
| 5           | 10   | -0,123 |
| 19          | 10   | -0,123 |
| 4           | 11   | -0,036 |
| 18          | 11   | -0,036 |
| 8           | 12   | -0,029 |
| 12          | 12   | -0,029 |
| 1           | 13   | -0,008 |
| 15          | 13   | -0,008 |

Meta-Pred Web Server prediction results of site of metabolism for enzyme **CYP1A2**

| Atom Number | Rank | DeltaP |
|-------------|------|--------|
| 22          | 1    | 0,715  |
| 24          | 1    | 0,715  |
| 26          | 1    | 0,715  |
| 28          | 1    | 0,715  |
| 7           | 2    | 0,210  |
| 13          | 2    | 0,210  |
| 4           | 3    | 0,135  |
| 18          | 3    | 0,135  |
| 3           | 4    | 0,059  |
| 10          | 4    | 0,059  |
| 17          | 4    | 0,059  |
| 20          | 5    | -0,453 |
| 21          | 5    | -0,453 |
| 2           | 6    | -0,332 |
| 16          | 6    | -0,332 |
| 9           | 7    | -0,252 |
| 11          | 7    | -0,252 |
| 6           | 8    | -0,197 |
| 14          | 8    | -0,197 |
| 23          | 9    | -0,153 |
| 25          | 9    | -0,153 |
| 27          | 9    | -0,153 |
| 29          | 9    | -0,153 |
| 5           | 10   | -0,137 |
| 19          | 10   | -0,137 |
| 8           | 11   | -0,102 |
| 12          | 11   | -0,102 |
| 1           | 12   | -0,089 |
| 15          | 12   | -0,089 |

## Complex 2

Meta-Pred Web Server prediction results of site of metabolism for enzyme UGT

| Atom Number | Rank | DeltaP |
|-------------|------|--------|
| 7           | 1    | 0,059  |
| 14          | 1    | 0,059  |
| 4           | 2    | -0,757 |
| 5           | 2    | -0,757 |
| 19          | 2    | -0,757 |
| 20          | 2    | -0,757 |
| 1           | 3    | -0,640 |
| 2           | 3    | -0,640 |
| 3           | 3    | -0,640 |
| 16          | 3    | -0,640 |
| 17          | 3    | -0,640 |
| 18          | 3    | -0,640 |
| 6           | 4    | -0,330 |
| 8           | 4    | -0,330 |
| 10          | 4    | -0,330 |
| 15          | 4    | -0,330 |
| 21          | 4    | -0,330 |
| 22          | 4    | -0,330 |
| 9           | 5    | -0,138 |
| 23          | 5    | -0,138 |
| 11          | 6    | -0,022 |
| 13          | 6    | -0,022 |
| 12          | 7    | -0,021 |

Meta-Pred Web Server prediction results of site of metabolism for enzyme **CYP3A4**

| Atom Number | Rank | DeltaP |
|-------------|------|--------|
| 8           | 1    | 0,069  |
| 21          | 1    | 0,069  |
| 10          | 2    | -0,986 |
| 22          | 2    | -0,986 |
| 3           | 3    | -0,972 |
| 18          | 3    | -0,972 |
| 6           | 4    | -0,937 |
| 15          | 4    | -0,937 |
| 1           | 5    | -0,930 |
| 16          | 5    | -0,930 |
| 9           | 6    | -0,919 |
| 23          | 6    | -0,919 |
| 2           | 7    | -0,809 |
| 17          | 7    | -0,809 |
| 4           | 8    | -0,774 |
| 19          | 8    | -0,774 |
| 11          | 9    | -0,615 |
| 13          | 9    | -0,615 |
| 5           | 10   | -0,605 |
| 20          | 10   | -0,605 |
| 7           | 11   | -0,358 |
| 14          | 11   | -0,358 |
| 12          | 12   | -0,056 |

Meta-Pred Web Server prediction results of site of metabolism for enzyme **CYP2D6**

| Atom Number | Rank | DeltaP |
|-------------|------|--------|
| 8           | 1    | 0,372  |
| 21          | 1    | 0,372  |
| 12          | 2    | 0,215  |
| 1           | 3    | -0,928 |
| 16          | 3    | -0,928 |
| 3           | 4    | -0,927 |
| 18          | 4    | -0,927 |
| 9           | 5    | -0,881 |
| 10          | 5    | -0,881 |
| 22          | 5    | -0,881 |
| 23          | 5    | -0,881 |
| 6           | 6    | -0,853 |
| 15          | 6    | -0,853 |
| 2           | 7    | -0,638 |
| 17          | 7    | -0,638 |
| 5           | 8    | -0,528 |
| 20          | 8    | -0,528 |
| 4           | 9    | -0,491 |
| 19          | 9    | -0,491 |
| 7           | 10   | -0,326 |
| 11          | 10   | -0,326 |
| 13          | 10   | -0,326 |
| 14          | 10   | -0,326 |

Meta-Pred Web Server prediction results of site of metabolism for enzyme **CYP2C9**

| Atom Number | Rank | DeltaP |
|-------------|------|--------|
| 8           | 1    | 0,319  |
| 21          | 1    | 0,319  |
| 12          | 2    | 0,141  |
| 1           | 3    | -0,950 |
| 16          | 3    | -0,950 |
| 3           | 4    | -0,948 |
| 18          | 4    | -0,948 |
| 6           | 5    | -0,888 |
| 15          | 5    | -0,888 |
| 9           | 6    | -0,737 |
| 10          | 6    | -0,737 |
| 22          | 6    | -0,737 |
| 23          | 6    | -0,737 |
| 4           | 7    | -0,722 |
| 19          | 7    | -0,722 |
| 2           | 8    | -0,705 |
| 17          | 8    | -0,705 |
| 5           | 9    | -0,544 |
| 20          | 9    | -0,544 |
| 11          | 10   | -0,494 |
| 13          | 10   | -0,494 |
| 7           | 11   | -0,172 |
| 14          | 11   | -0,172 |

Meta-Pred Web Server prediction results of site of metabolism for enzyme **CYP2C19**

| Atom Number | Rank | DeltaP |
|-------------|------|--------|
| 8           | 1    | 0,458  |
| 21          | 1    | 0,458  |
| 12          | 2    | 0,227  |
| 10          | 3    | -0,899 |
| 22          | 3    | -0,899 |
| 3           | 4    | -0,874 |
| 18          | 4    | -0,874 |
| 1           | 5    | -0,843 |
| 16          | 5    | -0,843 |
| 9           | 6    | -0,788 |
| 23          | 6    | -0,788 |
| 6           | 7    | -0,777 |
| 15          | 7    | -0,777 |
| 2           | 8    | -0,565 |
| 17          | 8    | -0,565 |
| 4           | 9    | -0,564 |
| 19          | 9    | -0,564 |
| 11          | 10   | -0,339 |
| 13          | 10   | -0,339 |
| 5           | 11   | -0,210 |
| 20          | 11   | -0,210 |
| 7           | 12   | -0,060 |
| 14          | 12   | -0,060 |

Meta-Pred Web Server prediction results of site of metabolism for enzyme **CYP1A2**

| Atom Number | Rank | DeltaP |
|-------------|------|--------|
| 8           | 1    | 0,299  |
| 21          | 1    | 0,299  |
| 12          | 2    | 0,042  |
| 10          | 3    | -0,908 |
| 22          | 3    | -0,908 |
| 3           | 4    | -0,820 |
| 18          | 4    | -0,820 |
| 1           | 5    | -0,809 |
| 16          | 5    | -0,809 |
| 9           | 6    | -0,796 |
| 23          | 6    | -0,796 |
| 6           | 7    | -0,746 |
| 15          | 7    | -0,746 |
| 2           | 8    | -0,410 |
| 17          | 8    | -0,410 |
| 11          | 9    | -0,399 |
| 13          | 9    | -0,399 |
| 4           | 10   | -0,382 |
| 19          | 10   | -0,382 |
| 5           | 11   | -0,336 |
| 20          | 11   | -0,336 |
| 7           | 12   | -0,193 |
| 14          | 12   | -0,193 |

### Complex 3

Meta-Pred Web Server prediction results of site of metabolism for enzyme UGT

| Atom Number | Rank | DeltaP |
|-------------|------|--------|
| 8           | 1    | 0,073  |
| 12          | 1    | 0,073  |
| 4           | 2    | -0,736 |
| 18          | 2    | -0,736 |
| 1           | 3    | -0,626 |
| 2           | 3    | -0,626 |
| 3           | 3    | -0,626 |
| 5           | 3    | -0,626 |
| 15          | 3    | -0,626 |
| 16          | 3    | -0,626 |
| 17          | 3    | -0,626 |
| 19          | 3    | -0,626 |
| 6           | 4    | -0,345 |
| 14          | 4    | -0,345 |
| 20          | 5    | -0,261 |
| 21          | 5    | -0,261 |
| 7           | 6    | -0,227 |
| 13          | 6    | -0,227 |
| 22          | 7    | -0,127 |
| 23          | 7    | -0,127 |
| 9           | 8    | -0,010 |
| 11          | 8    | -0,010 |
| 10          | 9    | -0,006 |

Meta-Pred Web Server prediction results of site of metabolism for enzyme **CYP3A4**

| Atom Number | Rank | DeltaP |
|-------------|------|--------|
| 2           | 1    | 0,588  |
| 16          | 1    | 0,588  |
| 4           | 2    | 0,334  |
| 18          | 2    | 0,334  |
| 7           | 3    | 0,267  |
| 13          | 3    | 0,267  |
| 10          | 4    | 0,233  |
| 6           | 5    | 0,012  |
| 14          | 5    | 0,012  |
| 20          | 6    | -0,953 |
| 21          | 6    | -0,953 |
| 3           | 7    | -0,920 |
| 17          | 7    | -0,920 |
| 22          | 8    | -0,776 |
| 23          | 8    | -0,776 |
| 1           | 9    | -0,684 |
| 15          | 9    | -0,684 |
| 9           | 10   | -0,327 |
| 11          | 10   | -0,327 |
| 5           | 11   | -0,214 |
| 19          | 11   | -0,214 |
| 8           | 12   | -0,047 |
| 12          | 12   | -0,047 |

Meta-Pred Web Server prediction results of site of metabolism for enzyme **CYP2D6**

| Atom Number | Rank | DeltaP |
|-------------|------|--------|
| 2           | 1    | 0,544  |
| 16          | 1    | 0,544  |
| 4           | 2    | 0,326  |
| 18          | 2    | 0,326  |
| 7           | 3    | 0,146  |
| 13          | 3    | 0,146  |
| 10          | 4    | 0,139  |
| 6           | 5    | 0,025  |
| 14          | 5    | 0,025  |
| 20          | 6    | -0,965 |
| 21          | 6    | -0,965 |
| 3           | 7    | -0,948 |
| 17          | 7    | -0,948 |
| 22          | 8    | -0,808 |
| 23          | 8    | -0,808 |
| 1           | 9    | -0,782 |
| 15          | 9    | -0,782 |
| 5           | 10   | -0,445 |
| 19          | 10   | -0,445 |
| 9           | 11   | -0,412 |
| 11          | 11   | -0,412 |
| 8           | 12   | -0,157 |
| 12          | 12   | -0,157 |

Meta-Pred Web Server prediction results of site of metabolism for enzyme **CYP2C9**

| Atom Number | Rank | DeltaP |
|-------------|------|--------|
| 10          | 1    | 0,136  |
| 7           | 2    | 0,123  |
| 13          | 2    | 0,123  |
| 20          | 3    | -0,940 |
| 21          | 3    | -0,940 |
| 3           | 4    | -0,888 |
| 17          | 4    | -0,888 |
| 1           | 5    | -0,736 |
| 15          | 5    | -0,736 |
| 22          | 6    | -0,689 |
| 23          | 6    | -0,689 |
| 6           | 7    | -0,679 |
| 14          | 7    | -0,679 |
| 5           | 8    | -0,609 |
| 19          | 8    | -0,609 |
| 9           | 9    | -0,459 |
| 11          | 9    | -0,459 |
| 4           | 10   | -0,281 |
| 18          | 10   | -0,281 |
| 8           | 11   | -0,155 |
| 12          | 11   | -0,155 |
| 2           | 12   | -0,021 |
| 16          | 12   | -0,021 |

Meta-Pred Web Server prediction results of site of metabolism for enzyme **CYP2C19**

| Atom Number | Rank | DeltaP |
|-------------|------|--------|
| 7           | 1    | 0,335  |
| 13          | 1    | 0,335  |
| 10          | 2    | 0,271  |
| 8           | 3    | 0,043  |
| 12          | 3    | 0,043  |
| 20          | 4    | -0,915 |
| 21          | 4    | -0,915 |
| 3           | 5    | -0,896 |
| 17          | 5    | -0,896 |
| 22          | 6    | -0,686 |
| 23          | 6    | -0,686 |
| 1           | 7    | -0,680 |
| 15          | 7    | -0,680 |
| 6           | 8    | -0,550 |
| 14          | 8    | -0,550 |
| 9           | 9    | -0,225 |
| 11          | 9    | -0,225 |
| 4           | 10   | -0,215 |
| 18          | 10   | -0,215 |
| 2           | 11   | -0,201 |
| 16          | 11   | -0,201 |
| 5           | 12   | -0,198 |
| 19          | 12   | -0,198 |

Meta-Pred Web Server prediction results of site of metabolism for enzyme **CYP1A2**

| Atom Number | Rank | DeltaP |
|-------------|------|--------|
| 2           | 1    | 0,710  |
| 16          | 1    | 0,710  |
| 4           | 2    | 0,388  |
| 18          | 2    | 0,388  |
| 7           | 3    | 0,126  |
| 13          | 3    | 0,126  |
| 10          | 4    | 0,082  |
| 20          | 5    | -0,930 |
| 21          | 5    | -0,930 |
| 3           | 6    | -0,861 |
| 17          | 6    | -0,861 |
| 22          | 7    | -0,713 |
| 23          | 7    | -0,713 |
| 1           | 8    | -0,575 |
| 15          | 8    | -0,575 |
| 9           | 9    | -0,332 |
| 11          | 9    | -0,332 |
| 5           | 10   | -0,287 |
| 19          | 10   | -0,287 |
| 8           | 11   | -0,140 |
| 12          | 11   | -0,140 |
| 6           | 12   | -0,002 |
| 14          | 12   | -0,002 |

#### Complex 4

Meta-Pred Web Server prediction results of site of metabolism for enzyme UGT

| Atom Number | Rank | DeltaP |
|-------------|------|--------|
| 2           | 1    | -0,914 |
| 16          | 1    | -0,914 |
| 1           | 2    | -0,818 |
| 3           | 2    | -0,818 |
| 4           | 2    | -0,818 |
| 5           | 2    | -0,818 |
| 15          | 2    | -0,818 |
| 17          | 2    | -0,818 |
| 18          | 2    | -0,818 |
| 19          | 2    | -0,818 |
| 6           | 3    | -0,637 |
| 14          | 3    | -0,637 |
| 20          | 4    | -0,503 |
| 21          | 4    | -0,503 |
| 7           | 5    | -0,355 |
| 13          | 5    | -0,355 |
| 10          | 6    | -0,045 |
| 9           | 7    | -0,043 |
| 11          | 7    | -0,043 |
| 8           | 8    | -0,024 |
| 12          | 8    | -0,024 |

Meta-Pred Web Server prediction results of site of metabolism for enzyme **CYP3A4**

| Atom Number | Rank | DeltaP |
|-------------|------|--------|
| 7           | 1    | 0,182  |
| 13          | 1    | 0,182  |
| 10          | 2    | 0,107  |
| 1           | 3    | 0,102  |
| 15          | 3    | 0,102  |
| 2           | 4    | 0,054  |
| 16          | 4    | 0,054  |
| 20          | 5    | -0,961 |
| 21          | 5    | -0,961 |
| 3           | 6    | -0,918 |
| 17          | 6    | -0,918 |
| 6           | 7    | -0,573 |
| 14          | 7    | -0,573 |
| 8           | 8    | -0,422 |
| 9           | 8    | -0,422 |
| 11          | 8    | -0,422 |
| 12          | 8    | -0,422 |
| 5           | 9    | -0,374 |
| 19          | 9    | -0,374 |
| 4           | 10   | -0,033 |
| 18          | 10   | -0,033 |

Meta-Pred Web Server prediction results of site of metabolism for enzyme **CYP2D6**

| Atom Number | Rank | DeltaP |
|-------------|------|--------|
| 2           | 1    | 0,425  |
| 16          | 1    | 0,425  |
| 7           | 2    | 0,145  |
| 13          | 2    | 0,145  |
| 10          | 3    | 0,139  |
| 20          | 4    | -0,952 |
| 21          | 4    | -0,952 |
| 3           | 5    | -0,844 |
| 17          | 5    | -0,844 |
| 6           | 6    | -0,697 |
| 14          | 6    | -0,697 |
| 5           | 7    | -0,595 |
| 19          | 7    | -0,595 |
| 8           | 8    | -0,377 |
| 9           | 8    | -0,377 |
| 11          | 8    | -0,377 |
| 12          | 8    | -0,377 |
| 4           | 9    | -0,280 |
| 18          | 9    | -0,280 |
| 1           | 10   | -0,003 |
| 15          | 10   | -0,003 |

Meta-Pred Web Server prediction results of site of metabolism for enzyme **CYP2C9**

| Atom Number | Rank | DeltaP |
|-------------|------|--------|
| 1           | 1    | 0,160  |
| 15          | 1    | 0,160  |
| 10          | 2    | 0,132  |
| 7           | 3    | 0,120  |
| 13          | 3    | 0,120  |
| 20          | 4    | -0,918 |
| 21          | 4    | -0,918 |
| 3           | 5    | -0,909 |
| 17          | 5    | -0,909 |
| 6           | 6    | -0,819 |
| 14          | 6    | -0,819 |
| 5           | 7    | -0,691 |
| 19          | 7    | -0,691 |
| 4           | 8    | -0,530 |
| 18          | 8    | -0,530 |
| 8           | 9    | -0,426 |
| 9           | 9    | -0,426 |
| 11          | 9    | -0,426 |
| 12          | 9    | -0,426 |
| 2           | 10   | -0,017 |
| 16          | 10   | -0,017 |

Meta-Pred Web Server prediction results of site of metabolism for enzyme **CYP2C19**

| Atom Number | Rank | DeltaP |
|-------------|------|--------|
| 7           | 1    | 0,277  |
| 13          | 1    | 0,277  |
| 1           | 2    | 0,230  |
| 15          | 2    | 0,230  |
| 10          | 3    | 0,194  |
| 2           | 4    | 0,183  |
| 16          | 4    | 0,183  |
| 20          | 5    | -0,925 |
| 21          | 5    | -0,925 |
| 3           | 6    | -0,835 |
| 17          | 6    | -0,835 |
| 6           | 7    | -0,710 |
| 14          | 7    | -0,710 |
| 5           | 8    | -0,387 |
| 19          | 8    | -0,387 |
| 8           | 9    | -0,310 |
| 9           | 9    | -0,310 |
| 11          | 9    | -0,310 |
| 12          | 9    | -0,310 |
| 4           | 10   | -0,056 |
| 18          | 10   | -0,056 |

Meta-Pred Web Server prediction results of site of metabolism for enzyme **CYP1A2**

| Atom Number | Rank | DeltaP |
|-------------|------|--------|
| 2           | 1    | 0,055  |
| 16          | 1    | 0,055  |
| 20          | 2    | -0,959 |
| 21          | 2    | -0,959 |
| 3           | 3    | -0,898 |
| 17          | 3    | -0,898 |
| 6           | 4    | -0,676 |
| 14          | 4    | -0,676 |
| 5           | 5    | -0,496 |
| 19          | 5    | -0,496 |
| 8           | 6    | -0,479 |
| 9           | 6    | -0,479 |
| 11          | 6    | -0,479 |
| 12          | 6    | -0,479 |
| 4           | 7    | -0,200 |
| 18          | 7    | -0,200 |
| 10          | 8    | -0,095 |
| 1           | 9    | -0,010 |
| 15          | 9    | -0,010 |
| 7           | 10   | -0,003 |
| 13          | 10   | -0,003 |

## Complex 5

Meta-Pred Web Server prediction results of site of metabolism for enzyme UGT

| Atom Number | Rank | DeltaP |
|-------------|------|--------|
| 3           | 1    | -0,838 |
| 17          | 1    | -0,838 |
| 2           | 2    | -0,783 |
| 16          | 2    | -0,783 |
| 4           | 3    | -0,708 |
| 5           | 3    | -0,708 |
| 18          | 3    | -0,708 |
| 19          | 3    | -0,708 |
| 1           | 4    | -0,603 |
| 15          | 4    | -0,603 |
| 6           | 5    | -0,487 |
| 14          | 5    | -0,487 |
| 22          | 5    | -0,487 |
| 23          | 5    | -0,487 |
| 7           | 6    | -0,250 |
| 13          | 6    | -0,250 |
| 10          | 7    | -0,040 |
| 9           | 8    | -0,039 |
| 11          | 8    | -0,039 |
| 20          | 9    | -0,022 |
| 21          | 9    | -0,022 |
| 8           | 10   | -0,021 |
| 12          | 10   | -0,021 |

Meta-Pred Web Server prediction results of site of metabolism for enzyme **CYP3A4**

| Atom Number | Rank | DeltaP |
|-------------|------|--------|
| 22          | 1    | 0,802  |
| 23          | 1    | 0,802  |
| 7           | 2    | 0,252  |
| 13          | 2    | 0,252  |
| 4           | 3    | 0,165  |
| 18          | 3    | 0,165  |
| 3           | 4    | 0,138  |
| 17          | 4    | 0,138  |
| 1           | 5    | 0,012  |
| 15          | 5    | 0,012  |
| 20          | 6    | -0,991 |
| 21          | 6    | -0,991 |
| 2           | 7    | -0,807 |
| 16          | 7    | -0,807 |
| 5           | 8    | -0,517 |
| 19          | 8    | -0,517 |
| 8           | 9    | -0,471 |
| 9           | 9    | -0,471 |
| 11          | 9    | -0,471 |
| 12          | 9    | -0,471 |
| 6           | 10   | -0,392 |
| 14          | 10   | -0,392 |
| 10          | 11   | -0,006 |

Meta-Pred Web Server prediction results of site of metabolism for enzyme **CYP2D6**

| Atom Number | Rank | DeltaP |
|-------------|------|--------|
| 22          | 1    | 0,916  |
| 23          | 1    | 0,916  |
| 7           | 2    | 0,035  |
| 13          | 2    | 0,035  |
| 20          | 3    | -0,991 |
| 21          | 3    | -0,991 |
| 2           | 4    | -0,845 |
| 16          | 4    | -0,845 |
| 5           | 5    | -0,691 |
| 19          | 5    | -0,691 |
| 6           | 6    | -0,677 |
| 14          | 6    | -0,677 |
| 8           | 7    | -0,605 |
| 9           | 7    | -0,605 |
| 11          | 7    | -0,605 |
| 12          | 7    | -0,605 |
| 4           | 8    | -0,194 |
| 18          | 8    | -0,194 |
| 1           | 9    | -0,192 |
| 15          | 9    | -0,192 |
| 10          | 10   | -0,187 |
| 3           | 11   | -0,072 |
| 17          | 11   | -0,072 |

Meta-Pred Web Server prediction results of site of metabolism for enzyme **CYP2C9**

| Atom Number | Rank | DeltaP |
|-------------|------|--------|
| 22          | 1    | 0,844  |
| 23          | 1    | 0,844  |
| 7           | 2    | 0,038  |
| 13          | 2    | 0,038  |
| 20          | 3    | -0,991 |
| 21          | 3    | -0,991 |
| 2           | 4    | -0,927 |
| 16          | 4    | -0,927 |
| 5           | 5    | -0,779 |
| 19          | 5    | -0,779 |
| 6           | 6    | -0,759 |
| 14          | 6    | -0,759 |
| 9           | 7    | -0,588 |
| 11          | 7    | -0,588 |
| 8           | 8    | -0,355 |
| 12          | 8    | -0,355 |
| 4           | 9    | -0,292 |
| 18          | 9    | -0,292 |
| 1           | 10   | -0,155 |
| 15          | 10   | -0,155 |
| 3           | 11   | -0,113 |
| 17          | 11   | -0,113 |
| 10          | 12   | -0,094 |

Meta-Pred Web Server prediction results of site of metabolism for enzyme **CYP2C19**

| Atom Number | Rank | DeltaP |
|-------------|------|--------|
| 22          | 1    | 0,877  |
| 23          | 1    | 0,877  |
| 7           | 2    | 0,262  |
| 13          | 2    | 0,262  |
| 3           | 3    | 0,223  |
| 17          | 3    | 0,223  |
| 1           | 4    | 0,211  |
| 15          | 4    | 0,211  |
| 10          | 5    | 0,035  |
| 20          | 6    | -0,989 |
| 21          | 6    | -0,989 |
| 2           | 7    | -0,822 |
| 16          | 7    | -0,822 |
| 6           | 8    | -0,546 |
| 14          | 8    | -0,546 |
| 5           | 9    | -0,479 |
| 19          | 9    | -0,479 |
| 8           | 10   | -0,419 |
| 9           | 10   | -0,419 |
| 11          | 10   | -0,419 |
| 12          | 10   | -0,419 |
| 4           | 11   | -0,135 |
| 18          | 11   | -0,135 |

Meta-Pred Web Server prediction results of site of metabolism for enzyme **CYP1A2**

| Atom Number | Rank | DeltaP |
|-------------|------|--------|
| 22          | 1    | 0,810  |
| 23          | 1    | 0,810  |
| 3           | 2    | 0,062  |
| 17          | 2    | 0,062  |
| 7           | 3    | 0,057  |
| 13          | 3    | 0,057  |
| 4           | 4    | 0,025  |
| 18          | 4    | 0,025  |
| 20          | 5    | -0,991 |
| 21          | 5    | -0,991 |
| 2           | 6    | -0,814 |
| 16          | 6    | -0,814 |
| 5           | 7    | -0,604 |
| 19          | 7    | -0,604 |
| 8           | 8    | -0,525 |
| 9           | 8    | -0,525 |
| 11          | 8    | -0,525 |
| 12          | 8    | -0,525 |
| 6           | 9    | -0,461 |
| 14          | 9    | -0,461 |
| 10          | 10   | -0,184 |
| 1           | 11   | -0,021 |
| 15          | 11   | -0,021 |

**Table S14.** Prediction of activity spectra for complexes **1–5**, for  $P_a > 0.7$  and  $P_a > 0.0$ .

**COMPLEX 1**

☐ All ☐  $P_a > P_i$  ☐  $P_a > 0,3$  ☒  $P_a > 0,7$

| $P_a$ | $P_i$ | Activity                                                  |
|-------|-------|-----------------------------------------------------------|
| 0,892 | 0,007 | Phobic disorders treatment                                |
| 0,730 | 0,022 | Acylcarnitine hydrolase inhibitor                         |
| 0,707 | 0,007 | Cardiovascular analeptic                                  |
| 0,703 | 0,013 | 27-Hydroxycholesterol 7 $\alpha$ -monooxygenase inhibitor |
| 0,722 | 0,053 | CYP2C12 substrate                                         |
| 0,702 | 0,054 | Testosterone 17 $\beta$ -dehydrogenase (NADP+) inhibitor  |

**COMPLEX 2**

☐ All ☐  $P_a > P_i$  ☐  $P_a > 0,3$  ☒  $P_a > 0,7$

| $P_a$ | $P_i$ | Activity                                                          |
|-------|-------|-------------------------------------------------------------------|
| 0,787 | 0,003 | Vascular endothelial growth factor 3 antagonist                   |
| 0,793 | 0,036 | Phobic disorders treatment                                        |
| 0,778 | 0,031 | Testosterone 17 $\beta$ -dehydrogenase (NADP+) inhibitor          |
| 0,762 | 0,018 | Nicotinic $\alpha 6 \beta 3 \beta 4 \alpha 5$ receptor antagonist |
| 0,758 | 0,017 | Antineoplastic                                                    |
| 0,760 | 0,029 | Acrocyllindropepsin inhibitor                                     |
| 0,760 | 0,029 | Saccharopepsin inhibitor                                          |
| 0,760 | 0,029 | Chymosin inhibitor                                                |
| 0,720 | 0,008 | Glucan 1,4- $\alpha$ -maltotriohydrolase inhibitor                |
| 0,706 | 0,003 | Tyrosine-protein kinase receptor FLT3 inhibitor                   |
| 0,721 | 0,019 | 5-O-(4-coumaroyl)-D-quinic 3'-monooxygenase inhibitor             |
| 0,746 | 0,049 | Aspulvinone dimethylallyltransferase inhibitor                    |
| 0,711 | 0,024 | Nicotinic $\alpha 2 \beta 2$ receptor antagonist                  |

**COMPLEX 3**

☐ All ☐  $P_a > P_i$  ☐  $P_a > 0,3$  ☒  $P_a > 0,7$

| $P_a$ | $P_i$ | Activity                    |
|-------|-------|-----------------------------|
| 0,850 | 0,001 | Prostaglandin E1 antagonist |

|       |       |                                                       |
|-------|-------|-------------------------------------------------------|
| 0,836 | 0,004 | Ophthalmic drug                                       |
| 0,824 | 0,003 | Antiglaucomic                                         |
| 0,831 | 0,023 | Phobic disorders treatment                            |
| 0,799 | 0,011 | Nicotinic alpha6beta3beta4alpha5 receptor antagonist  |
| 0,767 | 0,002 | Gestagen antagonist                                   |
| 0,760 | 0,013 | 5-O-(4-coumaroyl)-D-quinic 3'-monooxygenase inhibitor |
| 0,778 | 0,031 | Testosterone 17beta-dehydrogenase (NADP+) inhibitor   |
| 0,760 | 0,016 | Nicotinic alpha2beta2 receptor antagonist             |
| 0,760 | 0,029 | Acrocyllindropepsin inhibitor                         |
| 0,760 | 0,029 | Saccharopepsin inhibitor                              |
| 0,760 | 0,029 | Chymosin inhibitor                                    |
| 0,720 | 0,008 | Glucan 1,4-alpha-maltotriohydrolase inhibitor         |
| 0,702 | 0,050 | CYP2J substrate                                       |

#### COMPLEX 4

☐ All
 ☐ Pa>Pi
 ☐ Pa>0,3
 ☒ Pa>0,7

| Pa    | Pi    | Activity                                             |
|-------|-------|------------------------------------------------------|
| 0,799 | 0,034 | Phobic disorders treatment                           |
| 0,731 | 0,003 | Antineoplastic (non-Hodgkin's lymphoma)              |
| 0,733 | 0,008 | Phosphatase inhibitor                                |
| 0,752 | 0,038 | Testosterone 17beta-dehydrogenase (NADP+) inhibitor  |
| 0,733 | 0,025 | Nicotinic alpha6beta3beta4alpha5 receptor antagonist |
| 0,731 | 0,036 | Chymosin inhibitor                                   |
| 0,731 | 0,036 | Acrocyllindropepsin inhibitor                        |
| 0,731 | 0,036 | Saccharopepsin inhibitor                             |

## COMPLEX 5

☐ All
 ☐ Pa>Pi
 ☐ Pa>0,3
 ☒ Pa>0,7

| Pa    | Pi    | Activity                                             |
|-------|-------|------------------------------------------------------|
| 0,847 | 0,018 | Phobic disorders treatment                           |
| 0,829 | 0,009 | Antineoplastic                                       |
| 0,832 | 0,018 | Testosterone 17beta-dehydrogenase (NADP+) inhibitor  |
| 0,816 | 0,032 | CYP2C12 substrate                                    |
| 0,786 | 0,015 | Acylcarnitine hydrolase inhibitor                    |
| 0,790 | 0,023 | Saccharopepsin inhibitor                             |
| 0,790 | 0,023 | Chymosin inhibitor                                   |
| 0,790 | 0,023 | Acrocylindropepsin inhibitor                         |
| 0,774 | 0,024 | Antiseborrheic                                       |
| 0,754 | 0,014 | Alkylacetylgllycerophosphatase inhibitor             |
| 0,757 | 0,024 | Alkenylglycerophosphocholine hydrolase inhibitor     |
| 0,745 | 0,013 | JAK2 expression inhibitor                            |
| 0,733 | 0,003 | Antineoplastic (non-Hodgkin's lymphoma)              |
| 0,746 | 0,018 | Beta-adrenergic receptor kinase inhibitor            |
| 0,746 | 0,018 | G-protein-coupled receptor kinase inhibitor          |
| 0,753 | 0,030 | Antieczematic                                        |
| 0,727 | 0,004 | Imidazoline receptor agonist                         |
| 0,764 | 0,044 | Aspulvinone dimethylallyltransferase inhibitor       |
| 0,730 | 0,018 | Lysase inhibitor                                     |
| 0,717 | 0,008 | Glucan 1,4-alpha-maltotriohydrolase inhibitor        |
| 0,744 | 0,036 | CYP2J substrate                                      |
| 0,702 | 0,013 | 27-Hydroxycholesterol 7alpha-monooxygenase inhibitor |
| 0,729 | 0,058 | Ubiquinol-cytochrome-c reductase inhibitor           |

|       |       |                                                      |
|-------|-------|------------------------------------------------------|
| 0,703 | 0,032 | CYP2J2 substrate                                     |
| 0,701 | 0,034 | Nicotinic alpha6beta3beta4alpha5 receptor antagonist |

### Complex 1 All

☒ All
 ☐ Pa>Pi
 ☐ Pa>0,3
 ☐ Pa>0,7

| Pa    | Pi    | Activity                                                             |
|-------|-------|----------------------------------------------------------------------|
| 0,892 | 0,007 | Phobic disorders treatment                                           |
| 0,730 | 0,022 | Acylcarnitine hydrolase inhibitor                                    |
| 0,707 | 0,007 | Cardiovascular analeptic                                             |
| 0,703 | 0,013 | 27-Hydroxycholesterol 7alpha-monooxygenase inhibitor                 |
| 0,692 | 0,004 | Peptidoglycan glycosyltransferase inhibitor                          |
| 0,722 | 0,053 | CYP2C12 substrate                                                    |
| 0,671 | 0,006 | Sigma receptor agonist                                               |
| 0,686 | 0,022 | Alkylacetylgllycerophosphatase inhibitor                             |
| 0,664 | 0,006 | Antineoplastic (non-Hodgkin's lymphoma)                              |
| 0,702 | 0,054 | Testosterone 17beta-dehydrogenase (NADP+) inhibitor                  |
| 0,666 | 0,050 | Antineurotic                                                         |
| 0,623 | 0,008 | Dolichyl-diphosphooligosaccharide-protein glycotransferase inhibitor |
| 0,687 | 0,073 | Ubiquinol-cytochrome-c reductase inhibitor                           |
| 0,667 | 0,054 | Chymosin inhibitor                                                   |
| 0,667 | 0,054 | Acrocyllindropepsin inhibitor                                        |
| 0,667 | 0,054 | Saccharopepsin inhibitor                                             |
| 0,607 | 0,004 | Sigma 1 receptor agonist                                             |
| 0,651 | 0,050 | Nicotinic alpha6beta3beta4alpha5 receptor antagonist                 |
| 0,602 | 0,006 | Imidazoline receptor agonist                                         |
| 0,633 | 0,038 | 5-O-(4-coumaroyl)-D-quinic acid 3'-monooxygenase inhibitor           |
| 0,618 | 0,034 | Antidyskinetic                                                       |
| 0,607 | 0,033 | Glucan endo-1,6-beta-glucosidase inhibitor                           |
| 0,638 | 0,073 | CYP2J substrate                                                      |
| 0,574 | 0,021 | Glucan 1,4-alpha-maltotriohydrolase inhibitor                        |
| 0,588 | 0,044 | Ribulose-phosphate 3-epimerase inhibitor                             |
| 0,581 | 0,037 | UDP-N-acetylglucosamine 4-epimerase inhibitor                        |
| 0,612 | 0,081 | Membrane permeability inhibitor                                      |
| 0,544 | 0,016 | Apyrase inhibitor                                                    |

|       |       |                                                           |
|-------|-------|-----------------------------------------------------------|
| 0,536 | 0,019 | Cyclic AMP agonist                                        |
| 0,544 | 0,028 | Trimethylamine-oxide aldolase inhibitor                   |
| 0,584 | 0,068 | CYP2J2 substrate                                          |
| 0,556 | 0,042 | Acetylcholine neuromuscular blocking agent                |
| 0,552 | 0,039 | Glucan endo-1,3-beta-D-glucosidase inhibitor              |
| 0,552 | 0,043 | Platelet aggregation stimulant                            |
| 0,544 | 0,036 | Ovulation inhibitor                                       |
| 0,571 | 0,063 | Phosphatase inhibitor                                     |
| 0,548 | 0,050 | CYP3A2 substrate                                          |
| 0,556 | 0,059 | Nicotinic alpha2beta2 receptor antagonist                 |
| 0,597 | 0,101 | Mucomembranous protector                                  |
| 0,532 | 0,042 | Platelet adhesion inhibitor                               |
| 0,493 | 0,020 | H <sup>+</sup> -exporting ATPase inhibitor                |
| 0,525 | 0,060 | Protein-disulfide reductase (glutathione) inhibitor       |
| 0,550 | 0,088 | Polyporoepsin inhibitor                                   |
| 0,481 | 0,021 | 2-Haloacid dehalogenase inhibitor                         |
| 0,531 | 0,074 | Sugar-phosphatase inhibitor                               |
| 0,505 | 0,051 | 5 Hydroxytryptamine release stimulant                     |
| 0,482 | 0,029 | Na <sup>+</sup> -transporting two-sector ATPase inhibitor |
| 0,528 | 0,077 | Fusarinine-C ornithinesterase inhibitor                   |
| 0,467 | 0,017 | Antiparkinsonian                                          |
| 0,518 | 0,069 | Antiseborrheic                                            |
| 0,494 | 0,053 | Antiviral (Picornavirus)                                  |
| 0,472 | 0,036 | CYP2A4 substrate                                          |
| 0,462 | 0,026 | Nitrite reductase (NO-forming) inhibitor                  |
| 0,465 | 0,031 | CYP2A2 substrate                                          |
| 0,518 | 0,084 | Glutamyl endopeptidase II inhibitor                       |
| 0,493 | 0,061 | Carboxypeptidase Taq inhibitor                            |
| 0,484 | 0,054 | CYP3A1 substrate                                          |
| 0,455 | 0,028 | CYP2D2 inhibitor                                          |
| 0,468 | 0,042 | Phenol O-methyltransferase inhibitor                      |
| 0,475 | 0,052 | Antinociceptive                                           |
| 0,455 | 0,040 | Antisecretoric                                            |
| 0,470 | 0,057 | 1,4-Lactonase inhibitor                                   |
| 0,484 | 0,071 | Macrophage colony stimulating factor agonist              |
| 0,476 | 0,063 | Venombin AB inhibitor                                     |
| 0,464 | 0,053 | Membrane integrity antagonist                             |

|       |       |                                                                                                 |
|-------|-------|-------------------------------------------------------------------------------------------------|
| 0,415 | 0,006 | Cycloartenol synthase inhibitor                                                                 |
| 0,439 | 0,032 | Antimyopathies                                                                                  |
| 0,426 | 0,024 | Hematopoietic inhibitor                                                                         |
| 0,494 | 0,094 | Pseudolysin inhibitor                                                                           |
| 0,451 | 0,051 | Respiratory analeptic                                                                           |
| 0,513 | 0,114 | CYP2H substrate                                                                                 |
| 0,460 | 0,063 | Lysine 2,3-aminomutase inhibitor                                                                |
| 0,431 | 0,036 | Dementia treatment                                                                              |
| 0,464 | 0,069 | Limulus clotting factor B inhibitor                                                             |
| 0,439 | 0,044 | CYP2D15 substrate                                                                               |
| 0,448 | 0,054 | Exoribonuclease II inhibitor                                                                    |
| 0,436 | 0,043 | Acetylgalactosaminyl-O-glycosyl-glycoprotein beta-1,3-N-acetylglucosaminyltransferase inhibitor |
| 0,480 | 0,087 | Omptin inhibitor                                                                                |
| 0,413 | 0,020 | Chaperonin ATPase inhibitor                                                                     |
| 0,448 | 0,056 | Ecdysone 20-monooxygenase inhibitor                                                             |
| 0,396 | 0,007 | Histamine H1 receptor agonist                                                                   |
| 0,430 | 0,043 | Membrane permeability enhancer                                                                  |
| 0,462 | 0,076 | Lysase inhibitor                                                                                |
| 0,411 | 0,027 | DELTA14-sterol reductase inhibitor                                                              |
| 0,385 | 0,005 | Antineoplastic, alkylator                                                                       |
| 0,436 | 0,057 | CYP2D16 substrate                                                                               |
| 0,439 | 0,061 | Fragilysin inhibitor                                                                            |
| 0,416 | 0,040 | Peptide-N4-(N-acetyl-beta-glucosaminyl)asparagine amidase inhibitor                             |
| 0,393 | 0,019 | Imidazoline I1 receptor agonist                                                                 |
| 0,427 | 0,054 | Formaldehyde transketolase inhibitor                                                            |
| 0,440 | 0,068 | Neurotransmitter antagonist                                                                     |
| 0,438 | 0,067 | Fibrinogen receptor antagonist                                                                  |
| 0,441 | 0,074 | Alkenylglycerophosphocholine hydrolase inhibitor                                                |
| 0,452 | 0,087 | Electron-transferring-flavoprotein dehydrogenase inhibitor                                      |
| 0,401 | 0,036 | Albendazole monooxygenase inhibitor                                                             |
| 0,427 | 0,064 | Beta-adrenergic receptor kinase inhibitor                                                       |
| 0,427 | 0,064 | G-protein-coupled receptor kinase inhibitor                                                     |
| 0,425 | 0,064 | 4-Nitrophenol 2-monooxygenase inhibitor                                                         |
| 0,395 | 0,035 | Long-chain-aldehyde dehydrogenase inhibitor                                                     |
| 0,412 | 0,053 | Analeptic                                                                                       |
| 0,407 | 0,048 | All-trans-retinyl-palmitate hydrolase inhibitor                                                 |
| 0,385 | 0,027 | Opioid kappa 3 receptor antagonist                                                              |

|       |       |                                                         |
|-------|-------|---------------------------------------------------------|
| 0,438 | 0,081 | Alopecia treatment                                      |
| 0,405 | 0,050 | Acetylesterase inhibitor                                |
| 0,421 | 0,069 | Dimethylargininase inhibitor                            |
| 0,375 | 0,022 | Galactolipase inhibitor                                 |
| 0,373 | 0,022 | Flavin-containing monooxygenase inhibitor               |
| 0,423 | 0,073 | Spasmolytic, urinary                                    |
| 0,357 | 0,008 | Antineoplastic (liver cancer)                           |
| 0,407 | 0,060 | Gluconate 5-dehydrogenase inhibitor                     |
| 0,399 | 0,053 | Mucinaminyserine mucinaminidase inhibitor               |
| 0,379 | 0,033 | CYP2G1 substrate                                        |
| 0,372 | 0,027 | Oxidizing agent                                         |
| 0,371 | 0,028 | Sorbitol-6-phosphate 2-dehydrogenase inhibitor          |
| 0,396 | 0,057 | CYP2B5 substrate                                        |
| 0,386 | 0,050 | Phosphoinositide 5-phosphatase inhibitor                |
| 0,403 | 0,067 | Polyamine-transporting ATPase inhibitor                 |
| 0,370 | 0,035 | Hydroxylamine reductase (NADH) inhibitor                |
| 0,519 | 0,185 | Gluconate 2-dehydrogenase (acceptor) inhibitor          |
| 0,355 | 0,021 | Adrenaline release stimulant                            |
| 0,480 | 0,147 | Aspulvinone dimethylallyltransferase inhibitor          |
| 0,371 | 0,039 | Poly(beta-D-mannuronate) lyase inhibitor                |
| 0,358 | 0,029 | Benzaldehyde dehydrogenase (NADP+) inhibitor            |
| 0,371 | 0,043 | Phosphatidylinositol diacylglycerol-lyase inhibitor     |
| 0,431 | 0,105 | Complement factor D inhibitor                           |
| 0,378 | 0,052 | Limulus clotting factor C inhibitor                     |
| 0,384 | 0,060 | Simian immunodeficiency virus proteinase inhibitor      |
| 0,383 | 0,059 | Cyclohexanone monooxygenase inhibitor                   |
| 0,356 | 0,033 | Xylan endo-1,3-beta-xylosidase inhibitor                |
| 0,452 | 0,130 | Kidney function stimulant                               |
| 0,417 | 0,095 | 5 Hydroxytryptamine uptake stimulant                    |
| 0,369 | 0,051 | Myc inhibitor                                           |
| 0,365 | 0,048 | CYP3A7 substrate                                        |
| 0,345 | 0,030 | N-hydroxy-2-acetamidofluorene reductase inhibitor       |
| 0,371 | 0,058 | CYP2C9 inducer                                          |
| 0,364 | 0,052 | Pullulanase inhibitor                                   |
| 0,350 | 0,039 | CYP2B11 substrate                                       |
| 0,401 | 0,093 | Phosphatidylcholine-retinol O-acyltransferase inhibitor |
| 0,347 | 0,039 | Clavamate synthase inhibitor                            |

|       |       |                                                                                           |
|-------|-------|-------------------------------------------------------------------------------------------|
| 0,371 | 0,063 | Tpr proteinase ( <i>Porphyromonas gingivalis</i> ) inhibitor                              |
| 0,412 | 0,105 | NADPH-cytochrome-c2 reductase inhibitor                                                   |
| 0,381 | 0,074 | Sphinganine kinase inhibitor                                                              |
| 0,389 | 0,083 | CYP2A1 substrate                                                                          |
| 0,347 | 0,042 | Antiprotozoal ( <i>Amoeba</i> )                                                           |
| 0,334 | 0,029 | Steroid synthesis inhibitor                                                               |
| 0,363 | 0,058 | Leukopoiesis inhibitor                                                                    |
| 0,401 | 0,097 | Cytoprotectant                                                                            |
| 0,387 | 0,084 | Fibrolase inhibitor                                                                       |
| 0,324 | 0,025 | Vascular dementia treatment                                                               |
| 0,342 | 0,045 | Glycolate dehydrogenase inhibitor                                                         |
| 0,345 | 0,048 | Dextranase inhibitor                                                                      |
| 0,316 | 0,020 | Raynaud's phenomenon treatment                                                            |
| 0,342 | 0,049 | Undecaprenyldiphospho-muramoylpentapeptide beta-N-acetylglucosaminyltransferase inhibitor |
| 0,365 | 0,072 | Hydroxylamine oxidase inhibitor                                                           |
| 0,366 | 0,074 | Mannan endo-1,4-beta-mannosidase inhibitor                                                |
| 0,360 | 0,068 | GABA aminotransferase inhibitor                                                           |
| 0,322 | 0,032 | Alpha-N-acetylglucosaminidase inhibitor                                                   |
| 0,313 | 0,023 | Antineoplastic (small cell lung cancer)                                                   |
| 0,374 | 0,085 | Neurodegenerative diseases treatment                                                      |
| 0,321 | 0,032 | Thiamine-triphosphatase inhibitor                                                         |
| 0,350 | 0,063 | Aspergillopepsin I inhibitor                                                              |
| 0,408 | 0,123 | Gastrin inhibitor                                                                         |
| 0,342 | 0,057 | CYP7 inhibitor                                                                            |
| 0,344 | 0,060 | Lysostaphin inhibitor                                                                     |
| 0,327 | 0,045 | Taurine-2-oxoglutarate transaminase inhibitor                                             |
| 0,293 | 0,012 | Gastrointestinal motility stimulant                                                       |
| 0,373 | 0,092 | Vasoprotector                                                                             |
| 0,320 | 0,040 | Shikimate O-hydroxycinnamoyltransferase inhibitor                                         |
| 0,300 | 0,020 | Calcium-sensing receptor agonist                                                          |
| 0,296 | 0,016 | Farnesoid X receptor antagonist                                                           |
| 0,361 | 0,084 | Gonadotropin antagonist                                                                   |
| 0,412 | 0,135 | Membrane integrity agonist                                                                |
| 0,314 | 0,037 | Signal peptidase I inhibitor                                                              |
| 0,341 | 0,065 | Chitinase inhibitor                                                                       |
| 0,337 | 0,062 | Enteropeptidase inhibitor                                                                 |
| 0,366 | 0,093 | Hydrogen dehydrogenase inhibitor                                                          |

|       |       |                                                                          |
|-------|-------|--------------------------------------------------------------------------|
| 0,316 | 0,044 | Antitoxic                                                                |
| 0,287 | 0,015 | Alpha-pinene-oxide decyclase inhibitor                                   |
| 0,348 | 0,078 | N-acetylneuraminate 7-O(or 9-O)-acetyltransferase inhibitor              |
| 0,295 | 0,026 | 2-Haloacid dehalogenase (configuration-inverting) inhibitor              |
| 0,291 | 0,023 | ATP-binding cassette A1 stimulant                                        |
| 0,288 | 0,020 | Antineoplastic (ovarian cancer)                                          |
| 0,350 | 0,083 | Glycerol-3-phosphate oxidase inhibitor                                   |
| 0,336 | 0,069 | ADP-thymidine kinase inhibitor                                           |
| 0,294 | 0,028 | Oxytocic                                                                 |
| 0,309 | 0,046 | Dipeptidase E inhibitor                                                  |
| 0,346 | 0,085 | Menopausal disorders treatment                                           |
| 0,309 | 0,048 | Opioid dependency treatment                                              |
| 0,267 | 0,007 | Prolactin inhibitor                                                      |
| 0,283 | 0,023 | Cyclamate sulfohydrolase inhibitor                                       |
| 0,323 | 0,063 | D-lactaldehyde dehydrogenase inhibitor                                   |
| 0,283 | 0,024 | Alkylator                                                                |
| 0,293 | 0,034 | N-acetyllactosaminide beta-1,3-N-acetylglucosaminyltransferase inhibitor |
| 0,310 | 0,052 | Antineoplastic (pancreatic cancer)                                       |
| 0,311 | 0,054 | Thiosulfate dehydrogenase inhibitor                                      |
| 0,293 | 0,036 | Alkylglycerophosphoethanolamine phosphodiesterase inhibitor              |
| 0,351 | 0,094 | Fatty-acyl-CoA synthase inhibitor                                        |
| 0,336 | 0,080 | Peptidyl-dipeptidase Dcp inhibitor                                       |
| 0,302 | 0,046 | Hyaluronic acid agonist                                                  |
| 0,307 | 0,052 | Arylacetonitrilase inhibitor                                             |
| 0,336 | 0,080 | Alkenylglycerophosphoethanolamine hydrolase inhibitor                    |
| 0,294 | 0,038 | Glycine dehydrogenase (decarboxylating) inhibitor                        |
| 0,346 | 0,091 | Caspase 8 stimulant                                                      |
| 0,307 | 0,052 | Antiparkinsonian, rigidity relieving                                     |
| 0,367 | 0,113 | Erythropoiesis stimulant                                                 |
| 0,349 | 0,094 | Insulin promoter                                                         |
| 0,338 | 0,084 | Antipruritic                                                             |
| 0,349 | 0,095 | Rubredoxin-NAD <sup>+</sup> reductase inhibitor                          |
| 0,359 | 0,106 | Antihypoxic                                                              |
| 0,324 | 0,071 | Antiviral (Adenovirus)                                                   |
| 0,400 | 0,146 | Glycosylphosphatidylinositol phospholipase D inhibitor                   |
| 0,380 | 0,127 | Phospholipid-translocating ATPase inhibitor                              |
| 0,312 | 0,059 | Cyclomaltodextrinase inhibitor                                           |

|       |       |                                                                              |
|-------|-------|------------------------------------------------------------------------------|
| 0,351 | 0,098 | Arginine 2-monooxygenase inhibitor                                           |
| 0,369 | 0,117 | NADPH peroxidase inhibitor                                                   |
| 0,297 | 0,046 | MAP kinase kinase 4 inhibitor                                                |
| 0,329 | 0,079 | Glyoxylate reductase inhibitor                                               |
| 0,330 | 0,080 | (R)-Pantolactone dehydrogenase (flavin) inhibitor                            |
| 0,314 | 0,065 | N-acylmannosamine kinase inhibitor                                           |
| 0,297 | 0,048 | 2,3,4,5-Tetrahydropyridine-2,6-dicarboxylate N-succinyltransferase inhibitor |
| 0,337 | 0,089 | Thymidylate 5'-phosphatase inhibitor                                         |
| 0,315 | 0,068 | Loop diuretic                                                                |
| 0,369 | 0,121 | Octopamine antagonist                                                        |
| 0,305 | 0,057 | Glucan 1,4-alpha-maltotetraohydrolase inhibitor                              |
| 0,295 | 0,049 | Yeast ribonuclease inhibitor                                                 |
| 0,364 | 0,118 | Leukopoiesis stimulant                                                       |
| 0,305 | 0,062 | CYP2C10 substrate                                                            |
| 0,270 | 0,028 | Antidepressant, Imipramin-like                                               |
| 0,355 | 0,115 | Histamine release stimulant                                                  |
| 0,363 | 0,122 | MAP kinase stimulant                                                         |
| 0,283 | 0,045 | 2-Hydroxy-3-oxoadipate synthase inhibitor                                    |
| 0,333 | 0,095 | Feruloyl esterase inhibitor                                                  |
| 0,305 | 0,067 | Pyroglutamyl-peptidase II inhibitor                                          |
| 0,323 | 0,086 | Sulfite dehydrogenase inhibitor                                              |
| 0,314 | 0,079 | Antineoplastic (solid tumors)                                                |
| 0,324 | 0,090 | Gamma-guanidinobutyraldehyde dehydrogenase inhibitor                         |
| 0,362 | 0,128 | Fructose 5-dehydrogenase inhibitor                                           |
| 0,317 | 0,085 | Methylamine-glutamate N-methyltransferase inhibitor                          |
| 0,269 | 0,041 | RNA directed DNA polymerase inhibitor                                        |
| 0,312 | 0,085 | Fucoesterol-epoxide lyase inhibitor                                          |
| 0,269 | 0,042 | Aldosterone antagonist                                                       |
| 0,274 | 0,048 | Sclerosant                                                                   |
| 0,258 | 0,033 | CYP2D1 substrate                                                             |
| 0,375 | 0,150 | Phthalate 4,5-dioxygenase inhibitor                                          |
| 0,260 | 0,035 | Maltose-transporting ATPase inhibitor                                        |
| 0,301 | 0,077 | 4-Hydroxymandelate oxidase inhibitor                                         |
| 0,263 | 0,039 | Licheninase inhibitor                                                        |
| 0,310 | 0,087 | Adenomatous polyposis treatment                                              |
| 0,267 | 0,044 | Mannitol-1-phosphatase inhibitor                                             |
| 0,300 | 0,078 | Steroid N-acetylglucosaminyltransferase inhibitor                            |

|       |       |                                                |
|-------|-------|------------------------------------------------|
| 0,303 | 0,080 | Adenylyl-sulfate reductase inhibitor           |
| 0,350 | 0,127 | 2-Hydroxyquinoline 8-monooxygenase inhibitor   |
| 0,270 | 0,049 | Antitussive                                    |
| 0,264 | 0,044 | Phosphoenolpyruvate mutase inhibitor           |
| 0,253 | 0,033 | CNS active muscle relaxant                     |
| 0,239 | 0,021 | GST T substrate                                |
| 0,239 | 0,021 | GST T1-1 substrate                             |
| 0,354 | 0,135 | Chloride peroxidase inhibitor                  |
| 0,301 | 0,082 | 3-Cyanoalanine hydratase inhibitor             |
| 0,228 | 0,010 | 3-Isopropylmalate dehydrogenase inhibitor      |
| 0,294 | 0,076 | Mannose isomerase inhibitor                    |
| 0,320 | 0,103 | Vasodilator, coronary                          |
| 0,253 | 0,036 | Acaricide                                      |
| 0,278 | 0,061 | Gluconolactonase inhibitor                     |
| 0,267 | 0,051 | Glutarate-semialdehyde dehydrogenase inhibitor |
| 0,246 | 0,030 | Bile-salt sulfotransferase inhibitor           |
| 0,331 | 0,115 | GST A substrate                                |
| 0,295 | 0,079 | N-formylmethionyl-peptidase inhibitor          |
| 0,291 | 0,075 | IgA-specific serine endopeptidase inhibitor    |
| 0,281 | 0,066 | Glycerol-3-phosphate dehydrogenase inhibitor   |
| 0,268 | 0,054 | Pediculicide                                   |
| 0,345 | 0,132 | Aminobutyraldehyde dehydrogenase inhibitor     |
| 0,276 | 0,063 | HIV attachment inhibitor                       |
| 0,277 | 0,064 | Fructan beta-fructosidase inhibitor            |
| 0,308 | 0,096 | MMP9 expression inhibitor                      |
| 0,242 | 0,031 | Mucolytic                                      |
| 0,256 | 0,044 | Cellulose 1,4-beta-cellobiosidase inhibitor    |
| 0,279 | 0,067 | Ophthalmic drug                                |
| 0,288 | 0,078 | CYP2C11 substrate                              |
| 0,295 | 0,085 | Creatininase inhibitor                         |
| 0,339 | 0,129 | Sulfur reductase inhibitor                     |
| 0,249 | 0,039 | Protein synthesis inhibitor                    |
| 0,264 | 0,054 | Envelysin inhibitor                            |
| 0,263 | 0,054 | Antiprotozoal (Trichomonas)                    |
| 0,261 | 0,052 | Dopamine release stimulant                     |
| 0,248 | 0,040 | Aureolysin inhibitor                           |
| 0,315 | 0,108 | Intermittent claudication treatment            |

|       |       |                                                                                  |
|-------|-------|----------------------------------------------------------------------------------|
| 0,326 | 0,121 | JAK2 expression inhibitor                                                        |
| 0,255 | 0,049 | Antiparkinsonian, tremor relieving                                               |
| 0,286 | 0,082 | Isopenicillin-N epimerase inhibitor                                              |
| 0,341 | 0,137 | Oxygen scavenger                                                                 |
| 0,283 | 0,079 | Inotropic                                                                        |
| 0,289 | 0,086 | Nitrite reductase [NAD(P)H] inhibitor                                            |
| 0,302 | 0,100 | Bilirubin oxidase inhibitor                                                      |
| 0,259 | 0,057 | Cutinase inhibitor                                                               |
| 0,257 | 0,055 | Antipruritic, non-allergic                                                       |
| 0,364 | 0,163 | Proteasome ATPase inhibitor                                                      |
| 0,222 | 0,021 | Estradiol 17alpha-dehydrogenase inhibitor                                        |
| 0,257 | 0,058 | CDP-diacylglycerol-glycerol-3-phosphate 3-phosphatidyltransferase inhibitor      |
| 0,252 | 0,053 | Alpha-1,6-mannosyl-glycoprotein 4-beta-N-acetylglucosaminyltransferase inhibitor |
| 0,282 | 0,084 | Methylumbelliferyl-acetate deacetylase inhibitor                                 |
| 0,310 | 0,113 | Malate dehydrogenase (acceptor) inhibitor                                        |
| 0,293 | 0,096 | Prostaglandin-A1 DELTA-isomerase inhibitor                                       |
| 0,296 | 0,099 | Alkane 1-monooxygenase inhibitor                                                 |
| 0,216 | 0,019 | Beta-glucosidase inhibitor                                                       |
| 0,236 | 0,039 | Undecaprenyl-diphosphatase inhibitor                                             |
| 0,324 | 0,127 | Vasodilator, peripheral                                                          |
| 0,241 | 0,045 | Hydroxysteroid dehydrogenase inhibitor                                           |
| 0,241 | 0,045 | Bisphosphoglycerate mutase inhibitor                                             |
| 0,217 | 0,022 | Creatinase inhibitor                                                             |
| 0,312 | 0,119 | 3-Hydroxybenzoate 6-monooxygenase inhibitor                                      |
| 0,309 | 0,117 | Aspartate-phenylpyruvate transaminase inhibitor                                  |
| 0,257 | 0,065 | DNA ligase (ATP) inhibitor                                                       |
| 0,214 | 0,023 | Gaucher disease treatment                                                        |
| 0,308 | 0,118 | Cl--transporting ATPase inhibitor                                                |
| 0,272 | 0,081 | Aspergillus nuclease S1 inhibitor                                                |
| 0,234 | 0,044 | Aryldialkylphosphatase inhibitor                                                 |
| 0,246 | 0,056 | N-(long-chain-acyl)ethanolamine deacylase inhibitor                              |
| 0,222 | 0,032 | Allantoate deiminase inhibitor                                                   |
| 0,222 | 0,033 | Ganglioside galactosyltransferase inhibitor                                      |
| 0,257 | 0,069 | Ethanolamine-phosphate cytidyltransferase inhibitor                              |
| 0,306 | 0,119 | CYP3A5 substrate                                                                 |
| 0,246 | 0,059 | Pappalysin-1 inhibitor                                                           |
| 0,296 | 0,110 | CYP2E1 inducer                                                                   |

|       |       |                                                                 |
|-------|-------|-----------------------------------------------------------------|
| 0,299 | 0,113 | Malate oxidase inhibitor                                        |
| 0,293 | 0,108 | TNF expression inhibitor                                        |
| 0,230 | 0,046 | Expectorant                                                     |
| 0,218 | 0,034 | Saccharolysin inhibitor                                         |
| 0,296 | 0,113 | Histidine N-acetyltransferase inhibitor                         |
| 0,268 | 0,085 | Phosphatidylserine decarboxylase inhibitor                      |
| 0,217 | 0,035 | Antiglaucomic                                                   |
| 0,254 | 0,072 | Trimethylamine dehydrogenase inhibitor                          |
| 0,246 | 0,063 | N-acetyllactosamine synthase inhibitor                          |
| 0,195 | 0,013 | 5 Hydroxytryptamine 1A agonist                                  |
| 0,247 | 0,065 | Levanase inhibitor                                              |
| 0,348 | 0,166 | Taurine dehydrogenase inhibitor                                 |
| 0,226 | 0,044 | Antianorexic                                                    |
| 0,227 | 0,047 | Alpha-amylase inhibitor                                         |
| 0,231 | 0,052 | Poly(alpha-L-guluronate) lyase inhibitor                        |
| 0,208 | 0,029 | Psychosexual dysfunction treatment                              |
| 0,245 | 0,066 | Dimethylmaleate hydratase inhibitor                             |
| 0,212 | 0,033 | Protein-S-isoprenylcysteine O-methyltransferase inhibitor       |
| 0,238 | 0,059 | Protein-Npi-phosphohistidine-sugar phosphotransferase inhibitor |
| 0,217 | 0,039 | Deoxyribonuclease I inhibitor                                   |
| 0,217 | 0,038 | Antihypotensive                                                 |
| 0,221 | 0,043 | Galactose oxidase inhibitor                                     |
| 0,205 | 0,028 | Adenylate cyclase inhibitor                                     |
| 0,284 | 0,107 | Pro-opiomelanocortin converting enzyme inhibitor                |
| 0,305 | 0,127 | EIF4E expression inhibitor                                      |
| 0,238 | 0,061 | Ornithine cyclodeaminase inhibitor                              |
| 0,240 | 0,063 | UGT2B28 substrate                                               |
| 0,298 | 0,122 | Superoxide dismutase inhibitor                                  |
| 0,262 | 0,086 | Anesthetic general                                              |
| 0,234 | 0,058 | N-Acyl-D-aspartate deacylase inhibitor                          |
| 0,309 | 0,135 | Antipruritic, allergic                                          |
| 0,241 | 0,066 | Sulfite reductase inhibitor                                     |
| 0,227 | 0,053 | Lipocortins synthesis antagonist                                |
| 0,260 | 0,086 | CYP2C29 substrate                                               |
| 0,254 | 0,080 | NF-E2-related factor 2 stimulant                                |
| 0,207 | 0,033 | Glycerone-phosphate O-acyltransferase inhibitor                 |
| 0,278 | 0,105 | Antiviral (Influenza)                                           |

|       |       |                                                             |
|-------|-------|-------------------------------------------------------------|
| 0,257 | 0,084 | 2-Hydroxymuconate-semialdehyde hydrolase inhibitor          |
| 0,233 | 0,060 | Phospholipase A1 inhibitor                                  |
| 0,229 | 0,057 | D-alanine 2-hydroxymethyltransferase inhibitor              |
| 0,299 | 0,127 | Spermidine dehydrogenase inhibitor                          |
| 0,221 | 0,050 | Snalysin inhibitor                                          |
| 0,220 | 0,050 | Tropinesterase inhibitor                                    |
| 0,233 | 0,063 | Fumarate reductase (NADH) inhibitor                         |
| 0,235 | 0,066 | Oryzin inhibitor                                            |
| 0,257 | 0,088 | Flavin-containing monooxygenase substrate                   |
| 0,259 | 0,090 | RNA synthesis inhibitor                                     |
| 0,237 | 0,068 | Di-trans,poly-cis-decaprenylcistransferase inhibitor        |
| 0,258 | 0,089 | CYP2B10 substrate                                           |
| 0,330 | 0,162 | Glycerol-ether monooxygenase inhibitor                      |
| 0,223 | 0,054 | Dynein ATPase inhibitor                                     |
| 0,207 | 0,039 | Mannan endo-1,6-alpha-mannosidase inhibitor                 |
| 0,300 | 0,133 | CYP4A11 substrate                                           |
| 0,213 | 0,045 | CYP2B1 substrate                                            |
| 0,296 | 0,129 | Amine dehydrogenase inhibitor                               |
| 0,236 | 0,070 | Carboxypeptidase D inhibitor                                |
| 0,248 | 0,082 | Transcription factor NF kappa A inhibitor                   |
| 0,218 | 0,053 | Rhizopuspepsin inhibitor                                    |
| 0,268 | 0,103 | 3-Phytase inhibitor                                         |
| 0,372 | 0,207 | Calcium channel (voltage-sensitive) activator               |
| 0,180 | 0,016 | Urolithiasis treatment                                      |
| 0,273 | 0,109 | FMO1 substrate                                              |
| 0,279 | 0,115 | RELA expression inhibitor                                   |
| 0,243 | 0,079 | Aspartate-ammonia ligase inhibitor                          |
| 0,178 | 0,014 | 4-Carboxymethyl-4-methylbutenolide mutase inhibitor         |
| 0,246 | 0,082 | Mood disorders treatment                                    |
| 0,239 | 0,075 | Quinoprotein glucose dehydrogenase inhibitor                |
| 0,237 | 0,074 | Antiperistaltic                                             |
| 0,288 | 0,126 | Endopeptidase So inhibitor                                  |
| 0,207 | 0,045 | 3-Chloro-D-alanine dehydrochlorinase inhibitor              |
| 0,219 | 0,057 | Guanosine-3',5'-bis(diphosphate) 3'-diphosphatase inhibitor |
| 0,211 | 0,049 | GABA B receptor agonist                                     |
| 0,283 | 0,122 | Manganese peroxidase inhibitor                              |
| 0,225 | 0,064 | Interleukin 10 agonist                                      |

|       |       |                                                             |
|-------|-------|-------------------------------------------------------------|
| 0,269 | 0,109 | Alcohol dehydrogenase (acceptor) inhibitor                  |
| 0,210 | 0,051 | Tentoxilysin inhibitor                                      |
| 0,241 | 0,082 | Antidepressant                                              |
| 0,213 | 0,054 | Mitochondrial intermediate peptidase inhibitor              |
| 0,292 | 0,134 | P-glycoprotein substrate                                    |
| 0,218 | 0,061 | Polygalacturonase inhibitor                                 |
| 0,290 | 0,133 | S-formylglutathione hydrolase inhibitor                     |
| 0,180 | 0,023 | Glycosylphosphatidylinositol diacylglycerol-lyase inhibitor |
| 0,217 | 0,060 | Peptidyl-dipeptidase B inhibitor                            |
| 0,252 | 0,095 | Monoamine uptake inhibitor                                  |
| 0,264 | 0,107 | Chenodeoxycholytaurine hydrolase inhibitor                  |
| 0,224 | 0,069 | 3-Methylbutanal reductase inhibitor                         |
| 0,244 | 0,089 | DNA synthesis inhibitor                                     |
| 0,198 | 0,042 | Endo-1,3(4)-beta-glucanase inhibitor                        |
| 0,194 | 0,039 | Diisopropyl-fluorophosphatase inhibitor                     |
| 0,203 | 0,048 | Gametolysin inhibitor                                       |
| 0,257 | 0,103 | CYP4A substrate                                             |
| 0,253 | 0,099 | Peptide alpha-N-acetyltransferase inhibitor                 |
| 0,294 | 0,141 | Caspase 3 stimulant                                         |
| 0,200 | 0,048 | Alpha-Methylacyl-CoA racemase inhibitor                     |
| 0,221 | 0,068 | 2-Oxoaldehyde dehydrogenase (NADP+) inhibitor               |
| 0,204 | 0,051 | 1,4-Alpha-glucan branching enzyme inhibitor                 |
| 0,191 | 0,039 | Phosphoinositide phospholipase C inhibitor                  |
| 0,220 | 0,068 | Cyclooxygenase substrate                                    |
| 0,217 | 0,067 | Retinal dehydrogenase inhibitor                             |
| 0,188 | 0,037 | 3-Ketoalidoxylamine C-N-lyase inhibitor                     |
| 0,234 | 0,084 | Cyclic AMP modulator                                        |
| 0,160 | 0,009 | Alpha-L-fucosidase inhibitor                                |
| 0,177 | 0,027 | Trehalose-phosphatase inhibitor                             |
| 0,201 | 0,051 | D-xylulose reductase inhibitor                              |
| 0,214 | 0,064 | D-threo-aldose 1-dehydrogenase inhibitor                    |
| 0,255 | 0,105 | Antimetastatic                                              |
| 0,259 | 0,109 | Antiinflammatory, intestinal                                |
| 0,240 | 0,090 | Antialcoholic                                               |
| 0,186 | 0,037 | Galacturan 1,4-alpha-galacturonidase inhibitor              |
| 0,177 | 0,028 | Adenylate cyclase V inhibitor                               |
| 0,229 | 0,080 | Antineoplastic (brain cancer)                               |

|       |       |                                                       |
|-------|-------|-------------------------------------------------------|
| 0,156 | 0,008 | Squalene-hopene cyclase inhibitor                     |
| 0,203 | 0,054 | Isopenicillin-N synthase inhibitor                    |
| 0,233 | 0,085 | Transactivator transcription protein inhibitor        |
| 0,300 | 0,153 | Antineoplastic                                        |
| 0,334 | 0,187 | Antiviral (Rhinovirus)                                |
| 0,185 | 0,038 | 2,2-Dialkylglycine decarboxylase (pyruvate) inhibitor |
| 0,253 | 0,107 | Phosphopantothenoylcysteine decarboxylase inhibitor   |
| 0,224 | 0,078 | Nardilysin inhibitor                                  |
| 0,241 | 0,096 | Sulfite oxidase inhibitor                             |
| 0,229 | 0,084 | Glutaminyl-peptide cyclotransferase inhibitor         |
| 0,252 | 0,107 | Tyrosine 3 hydroxylase inhibitor                      |
| 0,275 | 0,130 | CYP3A4 inducer                                        |
| 0,162 | 0,017 | DELTA24-sterol reductase inhibitor                    |
| 0,298 | 0,153 | Pancreatic elastase inhibitor                         |
| 0,265 | 0,120 | CYP17 inhibitor                                       |
| 0,229 | 0,085 | Linoleoyl-CoA desaturase inhibitor                    |
| 0,239 | 0,095 | Transketolase inhibitor                               |
| 0,267 | 0,123 | CYP3A inducer                                         |
| 0,209 | 0,066 | Sodium channel blocker class Ib                       |
| 0,155 | 0,012 | Gentamicin 2''-nucleotidyltransferase inhibitor       |
| 0,247 | 0,104 | Chitosanase inhibitor                                 |
| 0,193 | 0,051 | 5 Hydroxytryptamine 7 agonist                         |
| 0,194 | 0,052 | Aldehyde dehydrogenase (NADP+) inhibitor              |
| 0,174 | 0,034 | Pectin lyase inhibitor                                |
| 0,280 | 0,139 | Apoptosis agonist                                     |
| 0,184 | 0,045 | Retinyl-palmitate esterase inhibitor                  |
| 0,170 | 0,031 | Alpha-N-acetylgalactosaminidase inhibitor             |
| 0,146 | 0,007 | Protein 30S ribosomal subunit inhibitor               |
| 0,327 | 0,188 | TP53 expression enhancer                              |
| 0,187 | 0,049 | Ligase inhibitor                                      |
| 0,192 | 0,054 | 2-Acylglycerol O-acyltransferase inhibitor            |
| 0,227 | 0,090 | NADH kinase inhibitor                                 |
| 0,173 | 0,037 | Histamine agonist                                     |
| 0,245 | 0,109 | CYP2A5 substrate                                      |
| 0,221 | 0,085 | GST M substrate                                       |
| 0,222 | 0,086 | Glycine amidinotransferase inhibitor                  |
| 0,270 | 0,135 | Cyanoalanine nitrilase inhibitor                      |

|       |       |                                                              |
|-------|-------|--------------------------------------------------------------|
| 0,163 | 0,028 | CYP3A5 inducer                                               |
| 0,173 | 0,039 | N4-(beta-N-acetylglucosaminy)-L-asparaginase inhibitor       |
| 0,219 | 0,085 | Aspergillopepsin II inhibitor                                |
| 0,184 | 0,051 | Antitussive, narcotic                                        |
| 0,268 | 0,134 | Glucose oxidase inhibitor                                    |
| 0,257 | 0,124 | Antiviral (Herpes)                                           |
| 0,188 | 0,055 | Inulinase inhibitor                                          |
| 0,193 | 0,060 | Antirickettsial                                              |
| 0,297 | 0,165 | Oxidoreductase inhibitor                                     |
| 0,206 | 0,074 | UGT2B17 substrate                                            |
| 0,271 | 0,139 | Anthelmintic (Nematodes)                                     |
| 0,159 | 0,026 | Demethylsterigmatocystin 6-O-methyltransferase inhibitor     |
| 0,188 | 0,058 | Lactaldehyde reductase inhibitor                             |
| 0,236 | 0,106 | Skeletal muscle relaxant                                     |
| 0,168 | 0,038 | Riboflavin phosphotransferase inhibitor                      |
| 0,179 | 0,049 | Polar-amino-acid-transporting ATPase inhibitor               |
| 0,203 | 0,073 | Prenyl-diphosphatase inhibitor                               |
| 0,215 | 0,085 | Methanol dehydrogenase inhibitor                             |
| 0,188 | 0,058 | tRNA nucleotidyltransferase inhibitor                        |
| 0,200 | 0,071 | Vitamin-K-epoxide reductase (warfarin-insensitive) inhibitor |
| 0,225 | 0,096 | Muscle relaxant                                              |
| 0,317 | 0,188 | Thromboxane B2 antagonist                                    |
| 0,156 | 0,027 | Narcotic antagonist                                          |
| 0,162 | 0,033 | 1-Aminocyclopropane-1-carboxylate deaminase inhibitor        |
| 0,206 | 0,077 | Horriylsin inhibitor                                         |
| 0,278 | 0,149 | Biotinidase inhibitor                                        |
| 0,173 | 0,044 | Valine decarboxylase inhibitor                               |
| 0,176 | 0,047 | Protein synthesis stimulant                                  |
| 0,279 | 0,151 | Pterin deaminase inhibitor                                   |
| 0,179 | 0,051 | Methyltransferase substrate                                  |
| 0,187 | 0,059 | ADP-ribosylarginine hydrolase inhibitor                      |
| 0,157 | 0,030 | Choline dehydrogenase inhibitor                              |
| 0,217 | 0,091 | [acyl-carrier-protein] S-acetyltransferase inhibitor         |
| 0,168 | 0,042 | Glycopeptide alpha-N-acetylgalactosaminidase inhibitor       |
| 0,171 | 0,045 | Pancreatic endopeptidase E inhibitor                         |
| 0,183 | 0,057 | Choline-sulfatase inhibitor                                  |
| 0,175 | 0,050 | Sulfur dioxygenase inhibitor                                 |

|       |       |                                                             |
|-------|-------|-------------------------------------------------------------|
| 0,206 | 0,082 | Carminative                                                 |
| 0,263 | 0,138 | CYP3A3 substrate                                            |
| 0,148 | 0,024 | Shab potassium channel blocker                              |
| 0,171 | 0,047 | 2-Dehydropantoate aldolase inhibitor                        |
| 0,199 | 0,075 | Procollagen N-endopeptidase inhibitor                       |
| 0,240 | 0,117 | 4-Methoxybenzoate monooxygenase (O-demethylating) inhibitor |
| 0,167 | 0,044 | Lysyl endopeptidase inhibitor                               |
| 0,233 | 0,110 | Aldehyde dehydrogenase (pyrroloquinoline-quinone) inhibitor |
| 0,158 | 0,037 | Pregnane X receptor agonist                                 |
| 0,167 | 0,046 | Furin inhibitor                                             |
| 0,297 | 0,178 | Thioredoxin inhibitor                                       |
| 0,270 | 0,151 | Linoleate diol synthase inhibitor                           |
| 0,179 | 0,060 | Antineoplastic (renal cancer)                               |
| 0,247 | 0,128 | 4-Hydroxyproline epimerase inhibitor                        |
| 0,168 | 0,049 | Ferredoxin-NADP+ reductase inhibitor                        |
| 0,313 | 0,195 | Fibrinolytic                                                |
| 0,182 | 0,064 | Plasmanylethanolamine desaturase inhibitor                  |
| 0,266 | 0,148 | Leukotriene-C4 synthase inhibitor                           |
| 0,226 | 0,109 | Arylmalonate decarboxylase inhibitor                        |
| 0,184 | 0,066 | Sterol 3-beta-glucosyltransferase inhibitor                 |
| 0,218 | 0,101 | Chloride channel activator                                  |
| 0,191 | 0,074 | (S)-3-amino-2-methylpropionate transaminase inhibitor       |
| 0,160 | 0,043 | Antibacterial, ophthalmic                                   |
| 0,255 | 0,138 | Antiprotozoal (Leishmania)                                  |
| 0,194 | 0,077 | Phosphatidylglycerophosphatase inhibitor                    |
| 0,216 | 0,101 | Phosphatidylcholine-sterol O-acyltransferase inhibitor      |
| 0,121 | 0,006 | Dopamine D2A antagonist                                     |
| 0,179 | 0,064 | NAD+ synthase (glutamine-hydrolysing) inhibitor             |
| 0,265 | 0,150 | Transcription factor stimulant                              |
| 0,265 | 0,150 | Transcription factor NF kappa B stimulant                   |
| 0,244 | 0,129 | Aldehyde oxidase inhibitor                                  |
| 0,176 | 0,062 | Antineoplastic (thyroid cancer)                             |
| 0,152 | 0,038 | Lysozyme inhibitor                                          |
| 0,193 | 0,079 | Crotonoyl-[acyl-carrier-protein] hydratase inhibitor        |
| 0,229 | 0,116 | Pyruvate decarboxylase inhibitor                            |
| 0,196 | 0,083 | Cyclopropane-fatty-acyl-phospholipid synthase inhibitor     |
| 0,169 | 0,056 | Glycerol-1-phosphatase inhibitor                            |

|       |       |                                                          |
|-------|-------|----------------------------------------------------------|
| 0,249 | 0,136 | Dehydro-L-gulonate decarboxylase inhibitor               |
| 0,214 | 0,102 | Coccolysin inhibitor                                     |
| 0,196 | 0,084 | Ubiquitin thiolesterase inhibitor                        |
| 0,180 | 0,068 | Gamma-butyrobetaine dioxygenase inhibitor                |
| 0,223 | 0,112 | Lipid peroxidase inhibitor                               |
| 0,336 | 0,225 | Nicotinic alpha4beta4 receptor agonist                   |
| 0,190 | 0,080 | Indoleacetaldoxime dehydratase inhibitor                 |
| 0,165 | 0,054 | Alcohol dehydrogenase inhibitor                          |
| 0,183 | 0,072 | Glutamate 5-kinase inhibitor                             |
| 0,197 | 0,087 | CYP2A3 substrate                                         |
| 0,204 | 0,094 | Cyclohexyl-isocyanide hydratase inhibitor                |
| 0,217 | 0,107 | DNA-3-methyladenine glycosylase I inhibitor              |
| 0,186 | 0,077 | Antinaupathic                                            |
| 0,126 | 0,017 | Sodium/hydrogen exchanger 5 inhibitor                    |
| 0,225 | 0,116 | Gingipain K inhibitor                                    |
| 0,255 | 0,146 | Lipoprotein lipase inhibitor                             |
| 0,215 | 0,106 | UGT2B4 substrate                                         |
| 0,189 | 0,081 | Tauropine dehydrogenase inhibitor                        |
| 0,164 | 0,056 | Phosphoenolpyruvate-protein phosphotransferase inhibitor |
| 0,141 | 0,033 | 2-Aminoethylphosphonate-pyruvate transaminase inhibitor  |
| 0,213 | 0,106 | Arylesterase inhibitor                                   |
| 0,116 | 0,009 | Alpha-mannosidase inhibitor                              |
| 0,237 | 0,130 | Antiamyloidogenic                                        |
| 0,202 | 0,094 | Bontoxilysin inhibitor                                   |
| 0,256 | 0,149 | HCV IRES inhibitor                                       |
| 0,159 | 0,052 | Endoglycosylceramidase inhibitor                         |
| 0,125 | 0,018 | CC chemokine 4 receptor antagonist                       |
| 0,182 | 0,075 | Sweetener                                                |
| 0,175 | 0,068 | Stromelysin 2 inhibitor                                  |
| 0,147 | 0,040 | (S)-carnitine 3-dehydrogenase inhibitor                  |
| 0,158 | 0,052 | Pectate lyase inhibitor                                  |
| 0,217 | 0,111 | Methane monooxygenase inhibitor                          |
| 0,138 | 0,033 | Beta-D-fucosidase inhibitor                              |
| 0,121 | 0,016 | Imidazoleglycerol-phosphate dehydratase inhibitor        |
| 0,235 | 0,131 | Arylsulfate sulfotransferase inhibitor                   |
| 0,234 | 0,130 | Antiviral (Influenza A)                                  |
| 0,166 | 0,062 | 3-Carboxyethylcatechol 2,3-dioxygenase inhibitor         |

|       |       |                                                                        |
|-------|-------|------------------------------------------------------------------------|
| 0,162 | 0,058 | UGT2B18 substrate                                                      |
| 0,211 | 0,108 | NOS2 expression inhibitor                                              |
| 0,211 | 0,108 | CYP2B substrate                                                        |
| 0,184 | 0,081 | UGT2B10 substrate                                                      |
| 0,165 | 0,063 | Lipotropic                                                             |
| 0,186 | 0,083 | Rhodotorulapepsin inhibitor                                            |
| 0,163 | 0,060 | Adenylate cyclase stimulant                                            |
| 0,204 | 0,101 | Diamine N-acetyltransferase inhibitor                                  |
| 0,155 | 0,053 | Restless leg syndrome treatment                                        |
| 0,175 | 0,072 | Alpha-glucuronidase inhibitor                                          |
| 0,222 | 0,120 | CYP2C6 substrate                                                       |
| 0,175 | 0,073 | Nitric oxide scavenger                                                 |
| 0,182 | 0,080 | Anesthetic                                                             |
| 0,172 | 0,070 | Aspartoacylase inhibitor                                               |
| 0,197 | 0,096 | Gamma-D-Glutamyl-meso-diaminopimelate peptidase inhibitor              |
| 0,163 | 0,063 | Glutamate (mGluR5) agonist                                             |
| 0,157 | 0,057 | Cellulase inhibitor                                                    |
| 0,141 | 0,042 | Heparan-alpha-glucosaminide N-acetyltransferase inhibitor              |
| 0,187 | 0,087 | Serine-pyruvate transaminase inhibitor                                 |
| 0,238 | 0,139 | (S)-6-hydroxynicotine oxidase inhibitor                                |
| 0,197 | 0,098 | Nucleoside oxidase (H2O2-forming) inhibitor                            |
| 0,201 | 0,102 | 1,2-alpha-L-fucosidase inhibitor                                       |
| 0,248 | 0,150 | Immunosuppressant                                                      |
| 0,131 | 0,033 | Phosphatidylinositol 3-kinase stimulant                                |
| 0,162 | 0,064 | Glucan 1,4-beta-glucosidase inhibitor                                  |
| 0,226 | 0,128 | Glutamate-tRNA ligase inhibitor                                        |
| 0,143 | 0,045 | Cholate-CoA ligase inhibitor                                           |
| 0,271 | 0,173 | Muramoyltetrapeptide carboxypeptidase inhibitor                        |
| 0,126 | 0,028 | Arabinose isomerase inhibitor                                          |
| 0,153 | 0,056 | BRAF expression inhibitor                                              |
| 0,206 | 0,108 | CYP2B2 substrate                                                       |
| 0,114 | 0,017 | Acetylcholine M3 receptor agonist                                      |
| 0,146 | 0,050 | Agmatinase inhibitor                                                   |
| 0,150 | 0,054 | N-(5-amino-5-carboxypentanoyl)-L-cysteinyl-D-valine synthase inhibitor |
| 0,272 | 0,176 | (R)-6-hydroxynicotine oxidase inhibitor                                |
| 0,182 | 0,086 | Nicotinic alpha4beta2 receptor antagonist                              |
| 0,141 | 0,045 | Aldehyde dehydrogenase [NAD(P)+] inhibitor                             |

|       |       |                                                  |
|-------|-------|--------------------------------------------------|
| 0,141 | 0,045 | Choloylglycine hydrolase inhibitor               |
| 0,221 | 0,126 | Choline-phosphate cytidyltransferase inhibitor   |
| 0,234 | 0,139 | L-glutamate oxidase inhibitor                    |
| 0,190 | 0,096 | Bisphosphoglycerate phosphatase inhibitor        |
| 0,141 | 0,047 | CYP19 inhibitor                                  |
| 0,179 | 0,085 | Arachidonic acid antagonist                      |
| 0,247 | 0,153 | Lysyl oxidase inhibitor                          |
| 0,144 | 0,050 | Obsessive-compulsive disorder treatment          |
| 0,169 | 0,075 | Serratia marcescens nuclease inhibitor           |
| 0,195 | 0,102 | Meprin B inhibitor                               |
| 0,248 | 0,155 | Mitochondrial processing peptidase inhibitor     |
| 0,156 | 0,064 | Aspartate-tRNA ligase inhibitor                  |
| 0,162 | 0,070 | Farnesyltranstransferase inhibitor               |
| 0,098 | 0,006 | Antibiotic Aminoglycoside-like                   |
| 0,222 | 0,131 | N-benzyloxycarbonylglycine hydrolase inhibitor   |
| 0,174 | 0,084 | Polyneuridine-aldehyde esterase inhibitor        |
| 0,216 | 0,126 | 4-Nitrophenylphosphatase inhibitor               |
| 0,186 | 0,097 | Polarisation inhibitor                           |
| 0,133 | 0,043 | Glutamate release inhibitor                      |
| 0,164 | 0,075 | Sphinganine-1-phosphate aldolase inhibitor       |
| 0,160 | 0,070 | Trans-pentaprenyltranstransferase inhibitor      |
| 0,189 | 0,100 | Spasmolytic, Papaverin-like                      |
| 0,136 | 0,047 | Trimethyllysine dioxygenase inhibitor            |
| 0,239 | 0,150 | CYP2A8 substrate                                 |
| 0,213 | 0,124 | Phospholipase C inhibitor                        |
| 0,187 | 0,099 | Morphine 6-dehydrogenase inhibitor               |
| 0,132 | 0,044 | Ribonuclease inhibitor                           |
| 0,168 | 0,080 | UGT1A5 substrate                                 |
| 0,151 | 0,063 | Peristaltic stimulant                            |
| 0,205 | 0,117 | Antifibrinolytic                                 |
| 0,270 | 0,182 | CYP2C8 substrate                                 |
| 0,117 | 0,031 | Galactosylgalactosylglucosylceramidase inhibitor |
| 0,157 | 0,071 | N-Acyl-D-amino-acid deacylase inhibitor          |
| 0,130 | 0,043 | Cytochrome-c3 hydrogenase inhibitor              |
| 0,124 | 0,037 | Squalene epoxidase inhibitor                     |
| 0,221 | 0,135 | Naphthalene 1,2-dioxygenase inhibitor            |
| 0,221 | 0,135 | Ferredoxin-NAD+ reductase inhibitor              |

|       |       |                                                                                 |
|-------|-------|---------------------------------------------------------------------------------|
| 0,253 | 0,167 | Polarisation stimulant                                                          |
| 0,117 | 0,032 | Acetylcholine M2 receptor agonist                                               |
| 0,194 | 0,109 | Opheline kinase inhibitor                                                       |
| 0,194 | 0,109 | Taurocyamine kinase inhibitor                                                   |
| 0,202 | 0,117 | Endopeptidase La inhibitor                                                      |
| 0,132 | 0,048 | Secretase stimulant                                                             |
| 0,132 | 0,048 | Secretase alpha stimulant                                                       |
| 0,150 | 0,065 | Insecticide                                                                     |
| 0,145 | 0,061 | Aminocarboxymuconate-semialdehyde decarboxylase inhibitor                       |
| 0,190 | 0,106 | Ceramide glucosyltransferase inhibitor                                          |
| 0,137 | 0,053 | Serine 3-dehydrogenase inhibitor                                                |
| 0,097 | 0,013 | Mannosidase inhibitor                                                           |
| 0,107 | 0,023 | Fatty-acyl-ethyl-ester synthase inhibitor                                       |
| 0,109 | 0,026 | 5 Hydroxytryptamine 1 agonist                                                   |
| 0,192 | 0,109 | Thiol oxidase inhibitor                                                         |
| 0,142 | 0,059 | Selenocysteine lyase inhibitor                                                  |
| 0,220 | 0,138 | DNA-(apurinic or apyrimidinic site) lyase inhibitor                             |
| 0,087 | 0,004 | FtsZ polymerization inhibitor                                                   |
| 0,163 | 0,081 | Glyoxylate reductase (NADP+) inhibitor                                          |
| 0,109 | 0,027 | High-mannose-oligosaccharide beta-1,4-N-acetylglucosaminyltransferase inhibitor |
| 0,163 | 0,082 | 6-Pyruvoyltetrahydropterin synthase inhibitor                                   |
| 0,143 | 0,062 | Alpha-N-arabinofuranosidase inhibitor                                           |
| 0,182 | 0,101 | Alanine-tRNA ligase inhibitor                                                   |
| 0,111 | 0,030 | Homoserine O-succinyltransferase inhibitor                                      |
| 0,144 | 0,064 | Dolichyl-phosphatase inhibitor                                                  |
| 0,120 | 0,040 | Lysine decarboxylase inhibitor                                                  |
| 0,098 | 0,018 | Anesthetic inhalation                                                           |
| 0,106 | 0,027 | Amylo-alpha-1,6-glucosidase inhibitor                                           |
| 0,136 | 0,056 | Carnitine dehydratase inhibitor                                                 |
| 0,163 | 0,083 | Styrene-oxide isomerase inhibitor                                               |
| 0,114 | 0,034 | Ca2+-transporting ATPase inhibitor                                              |
| 0,104 | 0,025 | Polyamine biosynthesis inhibitor                                                |
| 0,211 | 0,132 | 4-Coumarate-CoA ligase inhibitor                                                |
| 0,168 | 0,089 | Myeloblastin inhibitor                                                          |
| 0,157 | 0,079 | CYP2B18 substrate                                                               |
| 0,158 | 0,081 | UGT2B9 substrate                                                                |
| 0,251 | 0,174 | Antiinflammatory, ophthalmic                                                    |

|       |       |                                                               |
|-------|-------|---------------------------------------------------------------|
| 0,208 | 0,131 | tRNA-pseudouridine synthase I inhibitor                       |
| 0,167 | 0,090 | Leucine dehydrogenase inhibitor                               |
| 0,270 | 0,193 | Nicotine dehydrogenase inhibitor                              |
| 0,144 | 0,067 | Protein-tyrosine sulfotransferase inhibitor                   |
| 0,166 | 0,089 | Uterine stimulant                                             |
| 0,130 | 0,054 | Cholesterol oxidase inhibitor                                 |
| 0,187 | 0,112 | Diabetic nephropathy treatment                                |
| 0,216 | 0,141 | Antiviral (CMV)                                               |
| 0,155 | 0,081 | Acetylspermidine deacetylase inhibitor                        |
| 0,168 | 0,094 | Cyclopentanone monooxygenase inhibitor                        |
| 0,138 | 0,064 | Allantoinase inhibitor                                        |
| 0,121 | 0,047 | 4-Alpha-glucanotransferase inhibitor                          |
| 0,141 | 0,067 | Valine-tRNA ligase inhibitor                                  |
| 0,253 | 0,179 | Nitrate reductase (cytochrome) inhibitor                      |
| 0,189 | 0,115 | Peroxidase substrate                                          |
| 0,177 | 0,104 | Interleukin 6 antagonist                                      |
| 0,121 | 0,048 | Rhodopsin kinase inhibitor                                    |
| 0,271 | 0,198 | Pin1 inhibitor                                                |
| 0,168 | 0,095 | Vascular adhesion protein 1 inhibitor                         |
| 0,249 | 0,177 | Centromere associated protein inhibitor                       |
| 0,105 | 0,032 | Homospermidine synthase inhibitor                             |
| 0,221 | 0,149 | HMOX1 expression enhancer                                     |
| 0,106 | 0,034 | L-fuconate dehydratase inhibitor                              |
| 0,134 | 0,062 | Glucan 1,6-alpha-glucosidase inhibitor                        |
| 0,132 | 0,060 | CYP19 substrate                                               |
| 0,189 | 0,117 | Glutathione dehydrogenase (ascorbate) inhibitor               |
| 0,129 | 0,057 | Diacylglycerol cholinephosphotransferase inhibitor            |
| 0,153 | 0,082 | Allyl-alcohol dehydrogenase inhibitor                         |
| 0,115 | 0,043 | Diaminopropionate ammonia-lyase inhibitor                     |
| 0,145 | 0,074 | Testosterone 17beta-dehydrogenase inhibitor                   |
| 0,134 | 0,063 | Glutamate-1-semialdehyde 2,1-aminomutase inhibitor            |
| 0,200 | 0,130 | Cathepsin T inhibitor                                         |
| 0,094 | 0,023 | Alpha,alpha-trehalose phosphorylase inhibitor                 |
| 0,119 | 0,049 | 2-Aminohexano-6-lactam racemase inhibitor                     |
| 0,133 | 0,063 | Protein-glucosylgalactosylhydroxylysine glucosidase inhibitor |
| 0,161 | 0,091 | Microtubule formation inhibitor                               |
| 0,113 | 0,043 | Globoside alpha-N-acetylgalactosaminyltransferase inhibitor   |

|       |       |                                                                  |
|-------|-------|------------------------------------------------------------------|
| 0,108 | 0,038 | Ribonuclease U2 inhibitor                                        |
| 0,109 | 0,039 | Beta-amylase inhibitor                                           |
| 0,156 | 0,086 | Carnosine synthase inhibitor                                     |
| 0,083 | 0,013 | Glutamate (mGluR3) agonist                                       |
| 0,139 | 0,071 | Corticosteroid antagonist                                        |
| 0,132 | 0,064 | (S)-2-hydroxy-acid oxidase inhibitor                             |
| 0,119 | 0,051 | Site-specific DNA-methyltransferase (adenine-specific) inhibitor |
| 0,184 | 0,116 | Alcohol dehydrogenase [NAD(P)+] inhibitor                        |
| 0,120 | 0,053 | Hyperprolactinemia treatment                                     |
| 0,116 | 0,049 | Ribitol 2-dehydrogenase inhibitor                                |
| 0,135 | 0,068 | Thiamine-phosphate kinase inhibitor                              |
| 0,210 | 0,143 | Antiviral (Poxvirus)                                             |
| 0,072 | 0,005 | GHS receptor antagonist                                          |
| 0,103 | 0,036 | Neolactotetraosylceramide alpha-2,3-sialyltransferase inhibitor  |
| 0,122 | 0,056 | Glycerol-3-phosphate O-acyltransferase inhibitor                 |
| 0,106 | 0,040 | Ribose-5-phosphate-ammonia ligase inhibitor                      |
| 0,112 | 0,046 | Glutamine-pyruvate transaminase inhibitor                        |
| 0,144 | 0,079 | Acylaminoacyl-peptidase inhibitor                                |
| 0,154 | 0,089 | Anthranilate-CoA ligase inhibitor                                |
| 0,108 | 0,043 | UDP-N-acetylglucosamine diphosphorylase inhibitor                |
| 0,180 | 0,115 | Acyl-CoA oxidase inhibitor                                       |
| 0,153 | 0,088 | 2,4-Dichlorophenol 6-monooxygenase inhibitor                     |
| 0,082 | 0,018 | Acetylcholine muscarinic agonist                                 |
| 0,088 | 0,023 | 2,3-Oxidosqualene-lanosterol cyclase inhibitor                   |
| 0,222 | 0,158 | Cardioprotectant                                                 |
| 0,115 | 0,051 | NMDA receptor polyamine site antagonist                          |
| 0,098 | 0,034 | 11-Cis-retinyl-palmitate hydrolase inhibitor                     |
| 0,135 | 0,071 | Ethanolaminephosphotransferase inhibitor                         |
| 0,141 | 0,077 | Acetylenecarboxylate hydratase inhibitor                         |
| 0,116 | 0,052 | Succinate dehydrogenase inhibitor                                |
| 0,297 | 0,233 | CYP2C8 inhibitor                                                 |
| 0,112 | 0,049 | Inositol-polyphosphate 5-phosphatase inhibitor                   |
| 0,112 | 0,049 | Pyridoxal kinase inhibitor                                       |
| 0,129 | 0,066 | Polyamine oxidase inhibitor                                      |
| 0,200 | 0,138 | CYP2C3 substrate                                                 |
| 0,096 | 0,034 | 5 Hydroxytryptamine 1A antagonist                                |
| 0,117 | 0,055 | D-Ornithine 4,5-aminomutase inhibitor                            |

|       |       |                                                                                  |
|-------|-------|----------------------------------------------------------------------------------|
| 0,205 | 0,143 | CYP2F1 substrate                                                                 |
| 0,098 | 0,036 | Amino-acid racemase inhibitor                                                    |
| 0,136 | 0,074 | GABA inverse agonist                                                             |
| 0,136 | 0,074 | GABA A inverse agonist                                                           |
| 0,110 | 0,048 | Cytokine modulator                                                               |
| 0,109 | 0,048 | Glycerophosphocholine cholinephosphodiesterase inhibitor                         |
| 0,106 | 0,045 | Antineoplastic antibiotic                                                        |
| 0,086 | 0,025 | Beta galactosidase inhibitor                                                     |
| 0,293 | 0,232 | Diabetic neuropathy treatment                                                    |
| 0,124 | 0,064 | Methionine decarboxylase inhibitor                                               |
| 0,120 | 0,060 | Endo-1,4-beta-xylanase inhibitor                                                 |
| 0,145 | 0,085 | Homoserine dehydrogenase inhibitor                                               |
| 0,157 | 0,097 | Sedoheptulose-bisphosphatase inhibitor                                           |
| 0,124 | 0,064 | Mevalonate kinase inhibitor                                                      |
| 0,231 | 0,172 | Glutathione thiolesterase inhibitor                                              |
| 0,134 | 0,075 | Glucuronolactone reductase inhibitor                                             |
| 0,126 | 0,067 | Acyl-lysine deacylase inhibitor                                                  |
| 0,125 | 0,066 | 2-Oxoisovalerate dehydrogenase (acylating) inhibitor                             |
| 0,108 | 0,049 | Tyrosine-protein kinase TYRO 10 inhibitor                                        |
| 0,113 | 0,054 | Putrescine oxidase inhibitor                                                     |
| 0,183 | 0,125 | Aromatic-hydroxylamine O-acetyltransferase inhibitor                             |
| 0,233 | 0,174 | Antiinfective                                                                    |
| 0,141 | 0,083 | Procollagen C-endopeptidase inhibitor                                            |
| 0,084 | 0,026 | Arabinogalactan endo-1,4-beta-galactosidase inhibitor                            |
| 0,131 | 0,073 | Gingipain R inhibitor                                                            |
| 0,112 | 0,054 | Glyceraldehyde-3-phosphate dehydrogenase (phosphorylating) inhibitor             |
| 0,125 | 0,068 | Thiol S-methyltransferase inhibitor                                              |
| 0,154 | 0,097 | Antineoplastic (lung cancer)                                                     |
| 0,137 | 0,080 | CYP2E1 inhibitor                                                                 |
| 0,177 | 0,121 | Antihematotoxic                                                                  |
| 0,188 | 0,132 | Acetylserotonin O-methyltransferase inhibitor                                    |
| 0,142 | 0,085 | Aminopeptidase Y inhibitor                                                       |
| 0,124 | 0,068 | Glucan endo-1,3-alpha-glucosidase inhibitor                                      |
| 0,122 | 0,067 | Deoxyribose-phosphate aldolase inhibitor                                         |
| 0,070 | 0,015 | CYP24 substrate                                                                  |
| 0,090 | 0,035 | Alpha-1,6-mannosyl-glycoprotein 6-beta-N-acetylglucosaminyltransferase inhibitor |
| 0,109 | 0,054 | Gluconate dehydratase inhibitor                                                  |

|       |       |                                                       |
|-------|-------|-------------------------------------------------------|
| 0,159 | 0,104 | Metallocoxyypeptidase D inhibitor                     |
| 0,117 | 0,062 | Xylose isomerase inhibitor                            |
| 0,110 | 0,056 | Aerobactin synthase inhibitor                         |
| 0,184 | 0,130 | Dactylisin inhibitor                                  |
| 0,112 | 0,057 | Omega-amidase inhibitor                               |
| 0,181 | 0,127 | Prolyl aminopeptidase inhibitor                       |
| 0,132 | 0,078 | Cerebroside-sulfatase inhibitor                       |
| 0,119 | 0,067 | Neuropsin inhibitor                                   |
| 0,117 | 0,064 | Glucarate dehydratase inhibitor                       |
| 0,090 | 0,038 | Alpha 2a adrenoreceptor antagonist                    |
| 0,096 | 0,043 | 5 Hydroxytryptamine agonist                           |
| 0,106 | 0,054 | Leucine-tRNA ligase inhibitor                         |
| 0,111 | 0,059 | Pantothenase inhibitor                                |
| 0,119 | 0,067 | Carboxymethylenebutenolidase inhibitor                |
| 0,094 | 0,042 | Shock treatment                                       |
| 0,112 | 0,060 | D-arabinonolactone oxidase inhibitor                  |
| 0,155 | 0,104 | Maleate isomerase inhibitor                           |
| 0,152 | 0,100 | UGT2B7 substrate                                      |
| 0,083 | 0,032 | Peptidoglycan beta-N-acetylmuramidase inhibitor       |
| 0,093 | 0,042 | Argininosuccinate lyase inhibitor                     |
| 0,124 | 0,073 | CYP26A substrate                                      |
| 0,131 | 0,080 | CYP4B substrate                                       |
| 0,101 | 0,050 | Heme oxygenase inhibitor                              |
| 0,076 | 0,025 | NMDA receptor polyamine site agonist                  |
| 0,110 | 0,059 | Allantoicase inhibitor                                |
| 0,246 | 0,195 | Muscular dystrophy treatment                          |
| 0,091 | 0,041 | N-acetylglucosamine-6-phosphate deacetylase inhibitor |
| 0,116 | 0,066 | Dethiobiotin synthase inhibitor                       |
| 0,149 | 0,099 | Antimycoplasmal                                       |
| 0,211 | 0,161 | CYP2B6 substrate                                      |
| 0,115 | 0,066 | Aspartate kinase inhibitor                            |
| 0,095 | 0,046 | Oligo-1,6-glucosidase inhibitor                       |
| 0,114 | 0,065 | L-lysine 6-transaminase inhibitor                     |
| 0,205 | 0,156 | CYP2C18 substrate                                     |
| 0,062 | 0,013 | Neuraminidase inhibitor                               |
| 0,134 | 0,085 | Peptidylamidoglycolate lyase inhibitor                |
| 0,107 | 0,058 | Sorbose dehydrogenase inhibitor                       |

|       |       |                                                                                            |
|-------|-------|--------------------------------------------------------------------------------------------|
| 0,120 | 0,071 | Cocain dependency treatment                                                                |
| 0,138 | 0,089 | IgA-specific metalloendopeptidase inhibitor                                                |
| 0,222 | 0,173 | Nicotinate dehydrogenase inhibitor                                                         |
| 0,117 | 0,069 | ATP adenylyltransferase inhibitor                                                          |
| 0,113 | 0,065 | Arginine deiminase inhibitor                                                               |
| 0,119 | 0,071 | UDP-N-acetylglucosamine-dolichyl-phosphate N-acetylglucosaminephosphotransferase inhibitor |
| 0,097 | 0,050 | Proline dehydrogenase inhibitor                                                            |
| 0,119 | 0,072 | Carnitine 3-dehydrogenase inhibitor                                                        |
| 0,148 | 0,101 | Rhamnulose-1-phosphate aldolase inhibitor                                                  |
| 0,202 | 0,155 | Cell wall biosynthesis inhibitor                                                           |
| 0,107 | 0,061 | Aminoacylase inhibitor                                                                     |
| 0,125 | 0,078 | Tardive dyskinesia treatment                                                               |
| 0,151 | 0,105 | Male reproductive disfunction treatment                                                    |
| 0,181 | 0,134 | TRPA1 agonist                                                                              |
| 0,106 | 0,060 | Phosphatidate cytidyltransferase inhibitor                                                 |
| 0,140 | 0,094 | Trans-2-enoyl-CoA reductase (NAD+) inhibitor                                               |
| 0,140 | 0,094 | Pyruvate dehydrogenase (cytochrome) inhibitor                                              |
| 0,104 | 0,058 | Poly(3-hydroxybutyrate) depolymerase inhibitor                                             |
| 0,115 | 0,069 | 5 Hydroxytryptamine 4A antagonist                                                          |
| 0,147 | 0,102 | N-acetyl-gamma-glutamyl-phosphate reductase inhibitor                                      |
| 0,119 | 0,074 | D-Octopine dehydrogenase inhibitor                                                         |
| 0,140 | 0,094 | Oxalate oxidase inhibitor                                                                  |
| 0,166 | 0,120 | Opine dehydrogenase inhibitor                                                              |
| 0,205 | 0,160 | Cytochrome-b5 reductase inhibitor                                                          |
| 0,114 | 0,068 | NADH dehydrogenase inhibitor                                                               |
| 0,151 | 0,106 | Aldehyde dehydrogenase 2 substrate                                                         |
| 0,130 | 0,085 | CDP-diacylglycerol-inositol 3-phosphatidyltransferase inhibitor                            |
| 0,080 | 0,035 | Formimidoylglutamase inhibitor                                                             |
| 0,125 | 0,081 | Galactokinase inhibitor                                                                    |
| 0,175 | 0,131 | Protein-synthesizing GTPase inhibitor                                                      |
| 0,116 | 0,072 | Diacylglycerol kinase inhibitor                                                            |
| 0,072 | 0,028 | Alpha-1,6-mannosyl-glycoprotein 2-beta-N-acetylglucosaminyltransferase inhibitor           |
| 0,100 | 0,057 | Acetylcholine agonist                                                                      |
| 0,190 | 0,147 | Succinate-semialdehyde dehydrogenase [NAD(P)+] inhibitor                                   |
| 0,111 | 0,068 | UGT2B11 substrate                                                                          |
| 0,103 | 0,060 | Ornithine-oxo-acid transaminase inhibitor                                                  |
| 0,159 | 0,117 | Urate-ribonucleotide phosphorylase inhibitor                                               |

|       |       |                                                                                   |
|-------|-------|-----------------------------------------------------------------------------------|
| 0,081 | 0,039 | CYP4F12 substrate                                                                 |
| 0,125 | 0,083 | Anesthetic local                                                                  |
| 0,130 | 0,087 | Antineoplastic (gastric cancer)                                                   |
| 0,076 | 0,034 | 3-Alpha-hydroxysteroid dehydrogenase (B-specific) inhibitor                       |
| 0,145 | 0,102 | 3-Hydroxybutyryl-CoA dehydrogenase inhibitor                                      |
| 0,145 | 0,102 | 2,4-Diaminopentanoate dehydrogenase inhibitor                                     |
| 0,145 | 0,102 | Lysine 6-dehydrogenase inhibitor                                                  |
| 0,091 | 0,049 | Phosphatidylglycerol-membrane-oligosaccharide glycerophosphotransferase inhibitor |
| 0,113 | 0,071 | D-2-hydroxy-acid dehydrogenase inhibitor                                          |
| 0,153 | 0,111 | GABA C receptor agonist                                                           |
| 0,154 | 0,112 | Prunasin beta-glucosidase inhibitor                                               |
| 0,130 | 0,089 | Gly-X carboxypeptidase inhibitor                                                  |
| 0,143 | 0,102 | CYP2C8 inducer                                                                    |
| 0,073 | 0,031 | Chitin deacetylase inhibitor                                                      |
| 0,124 | 0,083 | N-acetylneuraminate synthase inhibitor                                            |
| 0,101 | 0,059 | Thermomycin inhibitor                                                             |
| 0,081 | 0,040 | 4a-Hydroxytetrahydrobiopterin dehydratase inhibitor                               |
| 0,085 | 0,043 | Alpha glucosidase inhibitor                                                       |
| 0,096 | 0,055 | Bis(5'-adenosyl)-triphosphatase inhibitor                                         |
| 0,066 | 0,025 | Glucan 1,3-alpha-glucosidase inhibitor                                            |
| 0,082 | 0,041 | mRNA (guanine-N7-)-methyltransferase inhibitor                                    |
| 0,200 | 0,159 | Formate-dihydrofolate ligase inhibitor                                            |
| 0,088 | 0,048 | (R)-aminopropanol dehydrogenase inhibitor                                         |
| 0,189 | 0,149 | Anti-Helicobacter pylori                                                          |
| 0,131 | 0,091 | Alkene monooxygenase inhibitor                                                    |
| 0,093 | 0,053 | Alpha 2c adrenoreceptor antagonist                                                |
| 0,060 | 0,020 | CC chemokine 2 receptor antagonist                                                |
| 0,075 | 0,035 | Glutathione reductase stimulant                                                   |
| 0,075 | 0,035 | Glutathione reductase (NADPH) stimulant                                           |
| 0,226 | 0,186 | Retinoic acid metabolism inhibitor                                                |
| 0,095 | 0,055 | 1,5-Anhydro-D-fructose reductase inhibitor                                        |
| 0,123 | 0,083 | Aldehyde dehydrogenase (NAD+) inhibitor                                           |
| 0,094 | 0,055 | Beta-N-acetylgalactosaminidase inhibitor                                          |
| 0,075 | 0,036 | Inositol 1,4,5-triphosphate receptor antagonist                                   |
| 0,134 | 0,095 | Nuclease inhibitor                                                                |
| 0,114 | 0,075 | Glucosamine-6-phosphate deaminase inhibitor                                       |
| 0,169 | 0,130 | Renal tissue kallikrein inhibitor                                                 |

|       |       |                                                                |
|-------|-------|----------------------------------------------------------------|
| 0,125 | 0,086 | Cysteine synthase inhibitor                                    |
| 0,137 | 0,098 | Geranylgeranyl-diphosphate geranylgeranyltransferase inhibitor |
| 0,061 | 0,023 | Na <sup>+</sup> K <sup>+</sup> transporting ATPase inhibitor   |
| 0,096 | 0,058 | Valine dehydrogenase (NADP <sup>+</sup> ) inhibitor            |
| 0,154 | 0,115 | Antiprotozoal (Plasmodium)                                     |
| 0,255 | 0,217 | 2-Dehydropantoate 2-reductase inhibitor                        |
| 0,118 | 0,080 | Prepilin peptidase inhibitor                                   |
| 0,118 | 0,080 | Haloacetate dehalogenase inhibitor                             |
| 0,065 | 0,027 | Glycine N-choloyltransferase inhibitor                         |
| 0,193 | 0,156 | Vasodilator                                                    |
| 0,142 | 0,104 | 4-Chlorophenylacetate 3,4-dioxygenase inhibitor                |
| 0,112 | 0,075 | Anabolic                                                       |
| 0,218 | 0,181 | H <sup>+</sup> -transporting two-sector ATPase inhibitor       |
| 0,060 | 0,024 | Biotin-[methylmalonyl-CoA-carboxytransferase] ligase inhibitor |
| 0,132 | 0,096 | Glutamate synthase (ferredoxin) inhibitor                      |
| 0,131 | 0,094 | Oligopeptidase B inhibitor                                     |
| 0,135 | 0,098 | Thioredoxin reductase inhibitor                                |
| 0,121 | 0,085 | Cancer procoagulant inhibitor                                  |
| 0,117 | 0,081 | 8-Amino-7-oxononanoate synthase inhibitor                      |
| 0,110 | 0,074 | (R)-limonene 6-monooxygenase inhibitor                         |
| 0,049 | 0,013 | CYP4F8 substrate                                               |
| 0,125 | 0,089 | Guanylate cyclase stimulant                                    |
| 0,159 | 0,124 | Lymphocytopoiesis inhibitor                                    |
| 0,129 | 0,094 | Hepatocyte nuclear factor antagonist                           |
| 0,129 | 0,094 | Hepatocyte nuclear factor 4 alpha antagonist                   |
| 0,136 | 0,101 | 4-Chlorobenzoyl-CoA dehalogenase inhibitor                     |
| 0,137 | 0,102 | Alkylglycerone-phosphate synthase inhibitor                    |
| 0,078 | 0,043 | Alpha adrenoreceptor agonist                                   |
| 0,102 | 0,068 | Galactoside 2-alpha-L-fucosyltransferase inhibitor             |
| 0,155 | 0,120 | Thermitase inhibitor                                           |
| 0,073 | 0,039 | Deoxyhypusine synthase inhibitor                               |
| 0,111 | 0,076 | Renal failure treatment                                        |
| 0,122 | 0,088 | Interferon antagonist                                          |
| 0,056 | 0,022 | Anhydrotetracycline monooxygenase inhibitor                    |
| 0,179 | 0,145 | Cholestanetriol 26-monooxygenase inhibitor                     |
| 0,128 | 0,094 | Glutamin-(asparagin-)ase inhibitor                             |
| 0,125 | 0,091 | Candidapepsin inhibitor                                        |

|       |       |                                                      |
|-------|-------|------------------------------------------------------|
| 0,087 | 0,053 | Galactosylceramidase inhibitor                       |
| 0,097 | 0,064 | Aspartate transaminase inhibitor                     |
| 0,077 | 0,043 | L-aminoadipate-semialdehyde dehydrogenase inhibitor  |
| 0,129 | 0,095 | Penicillopepsin inhibitor                            |
| 0,105 | 0,072 | Constipation treatment                               |
| 0,117 | 0,084 | Cathepsin H inhibitor                                |
| 0,320 | 0,287 | CDP-glycerol glycerophosphotransferase inhibitor     |
| 0,087 | 0,054 | Guanidinopropionase inhibitor                        |
| 0,107 | 0,074 | NAD(P)+ transhydrogenase (AB-specific) inhibitor     |
| 0,076 | 0,044 | Alternansucrase inhibitor                            |
| 0,115 | 0,082 | L-iduronidase inhibitor                              |
| 0,173 | 0,140 | O-aminophenol oxidase inhibitor                      |
| 0,180 | 0,148 | L-threonine 3-dehydrogenase inhibitor                |
| 0,073 | 0,041 | UGT2B7H substrate                                    |
| 0,073 | 0,041 | UGT2B7Y substrate                                    |
| 0,093 | 0,061 | Glycerol dehydratase inhibitor                       |
| 0,079 | 0,047 | Glycerophosphocholine phosphodiesterase inhibitor    |
| 0,169 | 0,137 | Antihypercholesterolemic                             |
| 0,247 | 0,216 | RNA-directed RNA polymerase inhibitor                |
| 0,100 | 0,069 | Glutamate N-acetyltransferase inhibitor              |
| 0,063 | 0,031 | D-Serine ammonia-lyase inhibitor                     |
| 0,086 | 0,054 | Cellobiose phosphorylase inhibitor                   |
| 0,140 | 0,109 | Inorganic diphosphatase inhibitor                    |
| 0,058 | 0,026 | Potassium channel Kv1.3 blocker                      |
| 0,183 | 0,152 | Hepatoprotectant                                     |
| 0,074 | 0,043 | Alpha-L-rhamnosidase inhibitor                       |
| 0,076 | 0,044 | 5 Hydroxytryptamine 1 antagonist                     |
| 0,072 | 0,041 | Sleep apnea treatment                                |
| 0,158 | 0,127 | Mandelate 4-monooxygenase inhibitor                  |
| 0,136 | 0,104 | Phosphatidate phosphatase inhibitor                  |
| 0,192 | 0,161 | AR expression inhibitor                              |
| 0,152 | 0,121 | Endopeptidase inhibitor                              |
| 0,118 | 0,087 | Acylglycerone-phosphate reductase inhibitor          |
| 0,117 | 0,086 | Allophanate hydrolase inhibitor                      |
| 0,079 | 0,049 | Beta 1 adrenoreceptor agonist                        |
| 0,138 | 0,107 | Anthranilate 3-monooxygenase (deaminating) inhibitor |
| 0,090 | 0,060 | CYP4F substrate                                      |

|       |       |                                                    |
|-------|-------|----------------------------------------------------|
| 0,079 | 0,049 | Aspartate-semialdehyde dehydrogenase inhibitor     |
| 0,098 | 0,068 | Aspartate-ammonia ligase (ADP-forming) inhibitor   |
| 0,118 | 0,088 | Interferon gamma antagonist                        |
| 0,036 | 0,006 | Sigma 3 receptor antagonist                        |
| 0,136 | 0,106 | 3-Hydroxy-4-oxoquinoline 2,4-dioxygenase inhibitor |
| 0,200 | 0,171 | Venom exonuclease inhibitor                        |
| 0,127 | 0,098 | 3-Aminobutyryl-CoA ammonia-lyase inhibitor         |
| 0,096 | 0,066 | Homocysteine desulfhydrase inhibitor               |
| 0,109 | 0,080 | Isovaleryl-CoA dehydrogenase inhibitor             |
| 0,036 | 0,007 | Cholesterol ester transfer protein antagonist      |
| 0,136 | 0,107 | Tryptophan dimethylallyltransferase inhibitor      |
| 0,083 | 0,054 | Sterol 24-C-methyltransferase inhibitor            |
| 0,059 | 0,031 | Glucan 1,4-alpha-glucosidase inhibitor             |
| 0,172 | 0,144 | Antibacterial                                      |
| 0,087 | 0,059 | Necroptosis inhibitor                              |
| 0,097 | 0,070 | DNA nucleotidylexotransferase inhibitor            |
| 0,080 | 0,053 | Anticholelithogenic                                |
| 0,060 | 0,033 | CMP-KDO synthase inhibitor                         |
| 0,135 | 0,108 | SMN2 expression enhancer                           |
| 0,180 | 0,154 | Lactose synthase inhibitor                         |
| 0,082 | 0,055 | Ribulose-bisphosphate carboxylase inhibitor        |
| 0,077 | 0,051 | Steroid sulfotransferase inhibitor                 |
| 0,045 | 0,019 | Glucosylceramidase inhibitor                       |
| 0,179 | 0,152 | Reductant                                          |
| 0,142 | 0,116 | Glycine C-acetyltransferase inhibitor              |
| 0,058 | 0,032 | D-Alanine-poly(phosphoribitol) ligase inhibitor    |
| 0,148 | 0,122 | Skin irritation, inactive                          |
| 0,103 | 0,078 | Phosphonoacetate hydrolase inhibitor               |
| 0,062 | 0,037 | Hyperparathyroidism treatment                      |
| 0,170 | 0,145 | Uroporphyrinogen-III synthase inhibitor            |
| 0,074 | 0,049 | Inositol-3-phosphate synthase inhibitor            |
| 0,105 | 0,080 | Acetolactate decarboxylase inhibitor               |
| 0,047 | 0,022 | Glutamate (mGluR2) agonist                         |
| 0,094 | 0,069 | CMP-N-acetylneuraminate monooxygenase inhibitor    |
| 0,074 | 0,049 | CYP2C2 substrate                                   |
| 0,105 | 0,081 | Poly(ADP-ribose) glycohydrolase inhibitor          |
| 0,128 | 0,104 | Glucosyl transferase inhibitor                     |

|       |       |                                                        |
|-------|-------|--------------------------------------------------------|
| 0,052 | 0,028 | Premature ejaculation treatment                        |
| 0,158 | 0,134 | Glyoxylate oxidase inhibitor                           |
| 0,053 | 0,029 | Sucrose-phosphate phosphatase inhibitor                |
| 0,104 | 0,080 | 2-Aminoadipate transaminase inhibitor                  |
| 0,058 | 0,035 | Sucrose alpha-glucosidase inhibitor                    |
| 0,136 | 0,113 | Acetylnornithine deacetylase inhibitor                 |
| 0,076 | 0,053 | Isoamylase inhibitor                                   |
| 0,099 | 0,076 | Dopamine D2S antagonist                                |
| 0,076 | 0,053 | Opioid mu 2 receptor antagonist                        |
| 0,081 | 0,059 | Acetylcholine muscarinic antagonist                    |
| 0,042 | 0,020 | Endo-beta-N-acetylglucosaminidase inhibitor            |
| 0,112 | 0,090 | Biotin carboxylase inhibitor                           |
| 0,159 | 0,137 | Pitrilysin inhibitor                                   |
| 0,102 | 0,080 | Cysteine desulfurase inhibitor                         |
| 0,078 | 0,056 | Paget's disease treatment                              |
| 0,047 | 0,026 | Glutamate (mGluR group II) agonist                     |
| 0,099 | 0,078 | MAP kinase kinase 7 inhibitor                          |
| 0,101 | 0,080 | D-lactate dehydrogenase (cytochrome) inhibitor         |
| 0,150 | 0,129 | Urticaria treatment                                    |
| 0,096 | 0,075 | Cyclooxygenase 1 substrate                             |
| 0,101 | 0,080 | NAD+ kinase inhibitor                                  |
| 0,053 | 0,033 | CYP17 substrate                                        |
| 0,086 | 0,065 | Dichloromuconate cycloisomerase inhibitor              |
| 0,088 | 0,068 | Alpha,alpha-trehalase inhibitor                        |
| 0,103 | 0,083 | Fructose-2,6-bisphosphate 2-phosphatase inhibitor      |
| 0,174 | 0,154 | Tankyrase inhibitor                                    |
| 0,144 | 0,124 | CYP4A2 substrate                                       |
| 0,105 | 0,085 | Glycogen (starch) synthase inhibitor                   |
| 0,101 | 0,082 | Decylcitrate synthase inhibitor                        |
| 0,081 | 0,062 | Arginyltransferase inhibitor                           |
| 0,125 | 0,106 | Brachyurin inhibitor                                   |
| 0,153 | 0,134 | Fibromyalgia syndrome treatment                        |
| 0,091 | 0,072 | Cytosole dipeptidase inhibitor                         |
| 0,031 | 0,012 | Alpha 2b adrenoreceptor agonist                        |
| 0,105 | 0,087 | Glycoprotein 3-alpha-L-fucosyltransferase inhibitor    |
| 0,087 | 0,068 | 2-Dehydropantolactone reductase (A-specific) inhibitor |
| 0,083 | 0,065 | Chelator                                               |

|       |       |                                                                                   |
|-------|-------|-----------------------------------------------------------------------------------|
| 0,091 | 0,073 | Ketohexokinase inhibitor                                                          |
| 0,052 | 0,034 | Spermidine synthase inhibitor                                                     |
| 0,108 | 0,090 | Pyruvate dehydrogenase inhibitor                                                  |
| 0,071 | 0,054 | Dihydrolipoamide S-acetyltransferase inhibitor                                    |
| 0,082 | 0,064 | Nitrile hydratase inhibitor                                                       |
| 0,109 | 0,092 | 3-Isopropylmalate dehydratase inhibitor                                           |
| 0,055 | 0,038 | Osmotic diuretic                                                                  |
| 0,139 | 0,122 | Camphor 1,2-monooxygenase inhibitor                                               |
| 0,152 | 0,134 | Antineoplastic (endocrine cancer)                                                 |
| 0,187 | 0,170 | CYP2A substrate                                                                   |
| 0,122 | 0,105 | Chitin synthase inhibitor                                                         |
| 0,138 | 0,122 | Hydroxymethylglutaryl-CoA lyase inhibitor                                         |
| 0,132 | 0,116 | N-acetylneuraminate 4-O-acetyltransferase inhibitor                               |
| 0,124 | 0,107 | VCAM1 expression inhibitor                                                        |
| 0,175 | 0,159 | Cis-1,2-dihydro-1,2-dihydroxynaphthalene dehydrogenase inhibitor                  |
| 0,064 | 0,048 | Steroid DELTA-isomerase inhibitor                                                 |
| 0,095 | 0,079 | Chondroitin 6-sulfotransferase inhibitor                                          |
| 0,077 | 0,061 | Retinol O-fatty-acyltransferase inhibitor                                         |
| 0,093 | 0,078 | Beta-mannosidase inhibitor                                                        |
| 0,094 | 0,078 | Glycoprotein-fucosylgalactoside alpha-N-acetylgalactosaminyltransferase inhibitor |
| 0,105 | 0,090 | O-acetylhomoserine aminocarboxypropyltransferase inhibitor                        |
| 0,110 | 0,095 | 2-Oxoglutarate decarboxylase inhibitor                                            |
| 0,036 | 0,021 | Gentamicin 3'-N-acetyltransferase inhibitor                                       |
| 0,064 | 0,049 | CYP24 inhibitor                                                                   |
| 0,030 | 0,015 | Alpha glucosidase I inhibitor                                                     |
| 0,148 | 0,133 | Dihydroxy-acid dehydratase inhibitor                                              |
| 0,136 | 0,122 | Glutathione peroxidase inhibitor                                                  |
| 0,081 | 0,067 | UDP-N-acetylglucosamine 2-epimerase inhibitor                                     |
| 0,065 | 0,051 | Corticotropin releasing factor antagonist                                         |
| 0,141 | 0,128 | Laxative                                                                          |
| 0,095 | 0,082 | Maly-CoA lyase inhibitor                                                          |
| 0,067 | 0,054 | 3(or 17)alpha-hydroxysteroid dehydrogenase inhibitor                              |
| 0,065 | 0,052 | Xylan 1,4-beta-xylosidase inhibitor                                               |
| 0,146 | 0,133 | Choleretic                                                                        |
| 0,052 | 0,039 | D-lactate-2-sulfatase inhibitor                                                   |
| 0,080 | 0,067 | Phosphorylase kinase inhibitor                                                    |
| 0,097 | 0,085 | Antibiotic                                                                        |

|       |       |                                                                                 |
|-------|-------|---------------------------------------------------------------------------------|
| 0,165 | 0,152 | Carbon-monoxide dehydrogenase inhibitor                                         |
| 0,132 | 0,120 | Polynucleotide 5'-hydroxy-kinase inhibitor                                      |
| 0,039 | 0,027 | Isopentenyl-diphosphate DELTA-isomerase inhibitor                               |
| 0,055 | 0,043 | Alpha,alpha-trehalose phosphorylase (configuration-retaining) inhibitor         |
| 0,073 | 0,061 | Cyanate hydratase inhibitor                                                     |
| 0,061 | 0,049 | Beta-1,4-mannosyl-glycoprotein 4-beta-N-acetylglucosaminyltransferase inhibitor |
| 0,066 | 0,054 | Alpha 3 adrenoreceptor agonist                                                  |
| 0,150 | 0,138 | Bothrolysin inhibitor                                                           |
| 0,184 | 0,172 | Myosin ATPase inhibitor                                                         |
| 0,300 | 0,288 | Antieczematic                                                                   |
| 0,053 | 0,042 | Assemblin inhibitor                                                             |
| 0,064 | 0,052 | Lactaldehyde dehydrogenase inhibitor                                            |
| 0,040 | 0,028 | Antimitotic, Podophyllotoxin-like                                               |
| 0,073 | 0,061 | Mycodextranase inhibitor                                                        |
| 0,058 | 0,047 | Opioid mu 1 receptor antagonist                                                 |
| 0,074 | 0,063 | 3(or 17)beta-hydroxysteroid dehydrogenase inhibitor                             |
| 0,138 | 0,127 | Guanidinoacetate kinase inhibitor                                               |
| 0,016 | 0,004 | Alcohol dehydrogenase gamma inhibitor                                           |
| 0,016 | 0,004 | Alcohol dehydrogenase gamma 2 inhibitor                                         |
| 0,081 | 0,070 | CYP26 substrate                                                                 |
| 0,128 | 0,117 | Heat shock protein agonist                                                      |
| 0,081 | 0,070 | D-proline reductase (dithiol) inhibitor                                         |
| 0,134 | 0,123 | Choline kinase inhibitor                                                        |
| 0,185 | 0,174 | Plastoquinol-plastocyanin reductase inhibitor                                   |
| 0,041 | 0,030 | Strombine dehydrogenase inhibitor                                               |
| 0,109 | 0,099 | CYP4B1 substrate                                                                |
| 0,062 | 0,051 | Alpha,alpha-phosphotrehalase inhibitor                                          |
| 0,081 | 0,070 | Alpha 2b adrenoreceptor antagonist                                              |
| 0,075 | 0,064 | N-acetylneuraminate lyase inhibitor                                             |
| 0,133 | 0,122 | Antineoplastic (melanoma)                                                       |
| 0,081 | 0,071 | Trimerelysin II inhibitor                                                       |
| 0,096 | 0,085 | Lactaldehyde reductase (NADPH) inhibitor                                        |
| 0,177 | 0,167 | Gamma-glutamyltransferase inhibitor                                             |
| 0,164 | 0,154 | Antineoplastic alkaloid                                                         |
| 0,119 | 0,109 | Narcolepsy treatment                                                            |
| 0,090 | 0,080 | Monocarboxylic acid transporter inhibitor                                       |
| 0,090 | 0,080 | Monocarboxylic acid transporter 1 inhibitor                                     |

|       |       |                                                       |
|-------|-------|-------------------------------------------------------|
| 0,058 | 0,048 | Malate synthase inhibitor                             |
| 0,077 | 0,067 | 2-Methyleneglutarate mutase inhibitor                 |
| 0,183 | 0,173 | Antihypertensive                                      |
| 0,078 | 0,068 | 5-Oxoprolinase (ATP-hydrolysing) inhibitor            |
| 0,074 | 0,064 | Cystathionine beta-lyase inhibitor                    |
| 0,023 | 0,014 | Alpha galactosidase inhibitor                         |
| 0,091 | 0,082 | Cholestenone 5alpha-reductase inhibitor               |
| 0,125 | 0,116 | Lipoxygenase substrate                                |
| 0,077 | 0,068 | Threonine ammonia-lyase inhibitor                     |
| 0,139 | 0,130 | CYP4F2 substrate                                      |
| 0,052 | 0,043 | Hydroxylysine kinase inhibitor                        |
| 0,056 | 0,047 | Alpha 2 adrenoreceptor agonist                        |
| 0,010 | 0,002 | Alcohol dehydrogenase alpha inhibitor                 |
| 0,047 | 0,039 | Delayed rectifier potassium channel blocker           |
| 0,079 | 0,071 | 2-Dehydro-3-deoxy-L-arabinonate dehydratase inhibitor |
| 0,053 | 0,045 | UGT2B4D substrate                                     |
| 0,053 | 0,045 | UGT2B19 substrate                                     |
| 0,053 | 0,045 | UGT2B4E substrate                                     |
| 0,053 | 0,045 | UGT2B30 substrate                                     |
| 0,053 | 0,045 | UGT2B23 substrate                                     |
| 0,068 | 0,060 | 1-Pyrroline-5-carboxylate dehydrogenase inhibitor     |
| 0,037 | 0,029 | Tartrate decarboxylase inhibitor                      |
| 0,027 | 0,020 | I(Ks) voltage-gated potassium channel blocker         |
| 0,074 | 0,066 | Nav1.7 sodium channel blocker                         |
| 0,035 | 0,028 | RNA agonist                                           |
| 0,091 | 0,084 | DNA-3-methyladenine glycosylase II inhibitor          |
| 0,128 | 0,121 | Lactate 2-monooxygenase inhibitor                     |
| 0,042 | 0,035 | D(-)-tartrate dehydratase inhibitor                   |
| 0,017 | 0,010 | Antiprotozoal activity enhancer                       |
| 0,053 | 0,046 | 1-Alkyl-2-acetylgllycerol O-acyltransferase inhibitor |
| 0,091 | 0,085 | Sulfate adenylyltransferase inhibitor                 |
| 0,134 | 0,129 | Penicillin amidase inhibitor                          |
| 0,090 | 0,084 | Glycine receptor antagonist                           |
| 0,151 | 0,145 | Carnitinamidase inhibitor                             |
| 0,025 | 0,020 | Histone-lysine N-methyltransferase inhibitor          |
| 0,122 | 0,117 | 3-Hydroxybenzoate 4-monooxygenase inhibitor           |
| 0,124 | 0,118 | Melanin inhibitor                                     |

|       |       |                                                                  |
|-------|-------|------------------------------------------------------------------|
| 0,222 | 0,216 | Cancer associated disorders treatment                            |
| 0,033 | 0,028 | Diphosphate-serine phosphotransferase inhibitor                  |
| 0,060 | 0,055 | 3-Dehydroquinase synthase inhibitor                              |
| 0,163 | 0,158 | Hydroxylamine reductase inhibitor                                |
| 0,069 | 0,064 | Malate dehydrogenase (NADP+) inhibitor                           |
| 0,087 | 0,082 | tRNA (cytosine-5-)-methyltransferase inhibitor                   |
| 0,049 | 0,044 | Androgen agonist                                                 |
| 0,069 | 0,065 | 2-Oxoaldehyde dehydrogenase (NAD+) inhibitor                     |
| 0,197 | 0,193 | FMO3 substrate                                                   |
| 0,108 | 0,104 | Iron-cytochrome-c reductase inhibitor                            |
| 0,067 | 0,063 | Aminolevulinate transaminase inhibitor                           |
| 0,114 | 0,109 | Laminaribiose phosphorylase inhibitor                            |
| 0,134 | 0,130 | Atrolisin A inhibitor                                            |
| 0,007 | 0,003 | Alcohol dehydrogenase I inhibitor                                |
| 0,048 | 0,044 | Testosterone agonist                                             |
| 0,039 | 0,035 | Androst-4-ene-3,17-dione monooxygenase inhibitor                 |
| 0,168 | 0,164 | Acidifying agent non gastric                                     |
| 0,087 | 0,083 | Cholinergic antagonist                                           |
| 0,115 | 0,111 | Granzyme A inhibitor                                             |
| 0,191 | 0,188 | Urethanase inhibitor                                             |
| 0,067 | 0,063 | D-alanine transaminase inhibitor                                 |
| 0,021 | 0,018 | Dopamine D2B antagonist                                          |
| 0,108 | 0,105 | VEGF expression inhibitor                                        |
| 0,068 | 0,065 | Serine-glyoxylate transaminase inhibitor                         |
| 0,086 | 0,084 | Adenosylmethionine-8-amino-7-oxononanoate transaminase inhibitor |
| 0,012 | 0,009 | Smo receptor agonist                                             |
| 0,129 | 0,126 | 3-Demethylubiquinone-9 3-O-methyltransferase inhibitor           |
| 0,052 | 0,049 | Prostaglandin-I synthase inhibitor                               |
| 0,128 | 0,126 | Glucuronate isomerase inhibitor                                  |
| 0,210 | 0,208 | NAD(P)+-arginine ADP-ribosyltransferase inhibitor                |
| 0,054 | 0,052 | Asparagine-oxo-acid transaminase inhibitor                       |
| 0,074 | 0,071 | Scyllo-inosamine-4-phosphate amidinotransferase inhibitor        |
| 0,063 | 0,061 | Propanediol dehydratase inhibitor                                |
| 0,196 | 0,194 | ICAM1 expression inhibitor                                       |
| 0,056 | 0,054 | Thioether S-methyltransferase inhibitor                          |
| 0,060 | 0,058 | Acetylcholine M3 receptor antagonist                             |
| 0,071 | 0,069 | Cysteine transaminase inhibitor                                  |

|       |       |                                                |
|-------|-------|------------------------------------------------|
| 0,104 | 0,102 | Membrane dipeptidase inhibitor                 |
| 0,019 | 0,018 | NMDA receptor phencyclidine site antagonist    |
| 0,127 | 0,126 | Antileprosy                                    |
| 0,195 | 0,194 | Antiprotozoal (Coccidial)                      |
| 0,055 | 0,054 | Acyl-CoA dehydrogenase inhibitor               |
| 0,112 | 0,111 | Guanidinoacetate N-methyltransferase inhibitor |
| 0,082 | 0,081 | Acetylcholine antagonist                       |
| 0,088 | 0,088 | Glucose 1-dehydrogenase inhibitor              |
| 0,096 | 0,096 | CYP3C substrate                                |
| 0,012 | 0,011 | CYP19 inducer                                  |
| 0,052 | 0,051 | ATP diphosphatase inhibitor                    |
| 0,089 | 0,088 | Cell wall synthesis inhibitor                  |
| 0,025 | 0,025 | Phosphopyruvate hydratase inhibitor            |
| 0,074 | 0,073 | Anthranilate synthase inhibitor                |
| 0,104 | 0,104 | Clostripain inhibitor                          |
| 0,043 | 0,043 | CYP3A11 substrate                              |
| 0,109 | 0,109 | Catalase inhibitor                             |
| 0,094 | 0,094 | Coagulant                                      |

## Complex 2 All

☒ All
 ☐ Pa>Pi
 ☐ Pa>0,3
 ☐ Pa>0,7

| Pa    | Pi    | Activity                                                   |
|-------|-------|------------------------------------------------------------|
| 0,787 | 0,003 | Vascular endothelial growth factor 3 antagonist            |
| 0,793 | 0,036 | Phobic disorders treatment                                 |
| 0,778 | 0,031 | Testosterone 17beta-dehydrogenase (NADP+) inhibitor        |
| 0,762 | 0,018 | Nicotinic alpha6beta3beta4alpha5 receptor antagonist       |
| 0,758 | 0,017 | Antineoplastic                                             |
| 0,760 | 0,029 | Acrocylindropepsin inhibitor                               |
| 0,760 | 0,029 | Saccharopepsin inhibitor                                   |
| 0,760 | 0,029 | Chymosin inhibitor                                         |
| 0,720 | 0,008 | Glucan 1,4-alpha-maltotriohydrolase inhibitor              |
| 0,706 | 0,003 | Tyrosine-protein kinase receptor FLT3 inhibitor            |
| 0,721 | 0,019 | 5-O-(4-coumaroyl)-D-quinic acid 3'-monooxygenase inhibitor |

|       |       |                                                                      |
|-------|-------|----------------------------------------------------------------------|
| 0,746 | 0,049 | Aspulvinone dimethylallyltransferase inhibitor                       |
| 0,711 | 0,024 | Nicotinic alpha2beta2 receptor antagonist                            |
| 0,680 | 0,001 | Steroid DELTA-isomerase inhibitor                                    |
| 0,696 | 0,034 | Sugar-phosphatase inhibitor                                          |
| 0,683 | 0,022 | Alkylacetylgllycerophosphatase inhibitor                             |
| 0,689 | 0,028 | Acylcarnitine hydrolase inhibitor                                    |
| 0,662 | 0,006 | Antineoplastic (non-Hodgkin's lymphoma)                              |
| 0,646 | 0,030 | Ribulose-phosphate 3-epimerase inhibitor                             |
| 0,663 | 0,064 | CYP2J substrate                                                      |
| 0,597 | 0,006 | Imidazoline receptor agonist                                         |
| 0,617 | 0,031 | Glucan endo-1,6-beta-glucosidase inhibitor                           |
| 0,639 | 0,056 | Polyporopepsin inhibitor                                             |
| 0,592 | 0,011 | Dolichyl-diphosphooligosaccharide-protein glycotransferase inhibitor |
| 0,583 | 0,005 | Platelet aggregation inhibitor                                       |
| 0,653 | 0,086 | Ubiquinol-cytochrome-c reductase inhibitor                           |
| 0,613 | 0,050 | Glutamyl endopeptidase II inhibitor                                  |
| 0,589 | 0,033 | Feruloyl esterase inhibitor                                          |
| 0,583 | 0,029 | 27-Hydroxycholesterol 7alpha-monooxygenase inhibitor                 |
| 0,595 | 0,046 | Alkenylglycerophosphocholine hydrolase inhibitor                     |
| 0,604 | 0,061 | CYP2J2 substrate                                                     |
| 0,560 | 0,019 | Mannan endo-1,4-beta-mannosidase inhibitor                           |
| 0,556 | 0,022 | All-trans-retinyl-palmitate hydrolase inhibitor                      |
| 0,568 | 0,035 | Glucan endo-1,3-beta-D-glucosidase inhibitor                         |
| 0,550 | 0,020 | CYP2A4 substrate                                                     |
| 0,575 | 0,050 | NADPH peroxidase inhibitor                                           |
| 0,570 | 0,046 | Complement factor D inhibitor                                        |
| 0,526 | 0,005 | Antineoplastic (lymphocytic leukemia)                                |
| 0,572 | 0,054 | Kidney function stimulant                                            |
| 0,546 | 0,046 | Platelet aggregation stimulant                                       |
| 0,509 | 0,013 | Dementia treatment                                                   |
| 0,537 | 0,041 | Chloride peroxidase inhibitor                                        |
| 0,486 | 0,002 | 4-Carboxymethyl-4-methylbutenolide mutase inhibitor                  |
| 0,530 | 0,048 | UDP-N-acetylglucosamine 4-epimerase inhibitor                        |
| 0,522 | 0,043 | Pterin deaminase inhibitor                                           |
| 0,531 | 0,052 | Macrophage colony stimulating factor agonist                         |
| 0,502 | 0,027 | Glyoxylate reductase inhibitor                                       |
| 0,493 | 0,019 | Albendazole monooxygenase inhibitor                                  |

|       |       |                                                            |
|-------|-------|------------------------------------------------------------|
| 0,498 | 0,031 | Pullulanase inhibitor                                      |
| 0,510 | 0,044 | Fatty-acyl-CoA synthase inhibitor                          |
| 0,498 | 0,033 | CYP2B5 substrate                                           |
| 0,498 | 0,038 | L-glutamate oxidase inhibitor                              |
| 0,510 | 0,052 | Limulus clotting factor B inhibitor                        |
| 0,464 | 0,011 | Imidazoline I1 receptor agonist                            |
| 0,533 | 0,086 | Phosphatase inhibitor                                      |
| 0,505 | 0,058 | Carboxypeptidase Taq inhibitor                             |
| 0,475 | 0,028 | Peptidoglycan glycosyltransferase inhibitor                |
| 0,533 | 0,086 | Glycosylphosphatidylinositol phospholipase D inhibitor     |
| 0,508 | 0,061 | Electron-transferring-flavoprotein dehydrogenase inhibitor |
| 0,488 | 0,046 | Exoribonuclease II inhibitor                               |
| 0,445 | 0,010 | Endo-1,3(4)-beta-glucanase inhibitor                       |
| 0,485 | 0,051 | 1,4-Lactonase inhibitor                                    |
| 0,508 | 0,075 | Omptin inhibitor                                           |
| 0,433 | 0,005 | Platelet activating factor antagonist                      |
| 0,496 | 0,069 | Platelet adhesion inhibitor                                |
| 0,481 | 0,061 | Venombin AB inhibitor                                      |
| 0,423 | 0,004 | Platelet activating factor alpha antagonist                |
| 0,450 | 0,032 | Chemosensitizer                                            |
| 0,469 | 0,051 | Hydrogen dehydrogenase inhibitor                           |
| 0,477 | 0,060 | JAK2 expression inhibitor                                  |
| 0,462 | 0,046 | Gluconate 5-dehydrogenase inhibitor                        |
| 0,466 | 0,050 | Trimethylamine-oxide aldolase inhibitor                    |
| 0,442 | 0,031 | Cardiovascular analeptic                                   |
| 0,491 | 0,080 | Acetylcholine neuromuscular blocking agent                 |
| 0,475 | 0,064 | GST A substrate                                            |
| 0,459 | 0,051 | Cyclic AMP agonist                                         |
| 0,448 | 0,041 | Acetylcholinesterase inhibitor                             |
| 0,450 | 0,048 | 3-Hydroxybenzoate 6-monooxygenase inhibitor                |
| 0,438 | 0,037 | Simian immunodeficiency virus proteinase inhibitor         |
| 0,463 | 0,063 | Phosphatidylcholine-retinol O-acyltransferase inhibitor    |
| 0,471 | 0,073 | Lysase inhibitor                                           |
| 0,490 | 0,096 | Fusarinine-C ornithinesterase inhibitor                    |
| 0,418 | 0,025 | Xylan endo-1,3-beta-xylosidase inhibitor                   |
| 0,421 | 0,028 | Cutinase inhibitor                                         |
| 0,392 | 0,001 | Elastase 1 inhibitor                                       |

|       |       |                                                                                                 |
|-------|-------|-------------------------------------------------------------------------------------------------|
| 0,394 | 0,005 | Proto-oncogene tyrosine-protein kinase Kit inhibitor                                            |
| 0,412 | 0,024 | Taurine-2-oxoglutarate transaminase inhibitor                                                   |
| 0,392 | 0,005 | GST T substrate                                                                                 |
| 0,392 | 0,005 | GST T1-1 substrate                                                                              |
| 0,435 | 0,048 | Alkenylglycerophosphoethanolamine hydrolase inhibitor                                           |
| 0,409 | 0,022 | Sorbitol-6-phosphate 2-dehydrogenase inhibitor                                                  |
| 0,395 | 0,009 | Vascular dementia treatment                                                                     |
| 0,485 | 0,100 | Pseudolysin inhibitor                                                                           |
| 0,458 | 0,074 | Thioredoxin inhibitor                                                                           |
| 0,417 | 0,036 | Arylmalonate decarboxylase inhibitor                                                            |
| 0,420 | 0,039 | Aspergillopepsin I inhibitor                                                                    |
| 0,453 | 0,072 | Alopecia treatment                                                                              |
| 0,410 | 0,032 | Glucan 1,4-alpha-maltotetraohydrolase inhibitor                                                 |
| 0,423 | 0,048 | Acetylgalactosaminyl-O-glycosyl-glycoprotein beta-1,3-N-acetylglucosaminyltransferase inhibitor |
| 0,404 | 0,032 | Poly(beta-D-mannuronate) lyase inhibitor                                                        |
| 0,420 | 0,049 | Na <sup>+</sup> -transporting two-sector ATPase inhibitor                                       |
| 0,400 | 0,030 | Glycolate dehydrogenase inhibitor                                                               |
| 0,393 | 0,023 | CDP-diacylglycerol-glycerol-3-phosphate 3-phosphatidyltransferase inhibitor                     |
| 0,396 | 0,027 | Shikimate O-hydroxycinnamoyltransferase inhibitor                                               |
| 0,389 | 0,021 | Pediculicide                                                                                    |
| 0,423 | 0,055 | Formaldehyde transketolase inhibitor                                                            |
| 0,430 | 0,064 | Fragilysin inhibitor                                                                            |
| 0,416 | 0,051 | N-acetylneuraminate 7-O(or 9-O)-acetyltransferase inhibitor                                     |
| 0,445 | 0,081 | Antidyskinetic                                                                                  |
| 0,457 | 0,094 | Phthalate 4,5-dioxygenase inhibitor                                                             |
| 0,434 | 0,072 | Lysine 2,3-aminomutase inhibitor                                                                |
| 0,393 | 0,033 | Antineoplastic (breast cancer)                                                                  |
| 0,381 | 0,024 | Myeloblastin inhibitor                                                                          |
| 0,425 | 0,068 | Dehydro-L-gulonate decarboxylase inhibitor                                                      |
| 0,445 | 0,091 | Ovulation inhibitor                                                                             |
| 0,383 | 0,030 | Clavamate synthase inhibitor                                                                    |
| 0,360 | 0,007 | Alpha-pinene-oxide decyclase inhibitor                                                          |
| 0,437 | 0,090 | Phospholipid-translocating ATPase inhibitor                                                     |
| 0,408 | 0,065 | CYP2D15 substrate                                                                               |
| 0,358 | 0,015 | Maltose-transporting ATPase inhibitor                                                           |
| 0,410 | 0,068 | CYP2D16 substrate                                                                               |
| 0,440 | 0,099 | Protein-disulfide reductase (glutathione) inhibitor                                             |

|       |       |                                                                                           |
|-------|-------|-------------------------------------------------------------------------------------------|
| 0,379 | 0,039 | 2-Haloacid dehalogenase inhibitor                                                         |
| 0,377 | 0,038 | Undecaprenyldiphospho-muramoylpentapeptide beta-N-acetylglucosaminyltransferase inhibitor |
| 0,388 | 0,050 | Malate oxidase inhibitor                                                                  |
| 0,437 | 0,101 | CYP2C12 substrate                                                                         |
| 0,383 | 0,048 | IgA-specific serine endopeptidase inhibitor                                               |
| 0,390 | 0,056 | Cyclohexanone monooxygenase inhibitor                                                     |
| 0,404 | 0,070 | Apyrase inhibitor                                                                         |
| 0,430 | 0,096 | NADPH-cytochrome-c2 reductase inhibitor                                                   |
| 0,364 | 0,031 | Yeast ribonuclease inhibitor                                                              |
| 0,357 | 0,024 | Sclerosant                                                                                |
| 0,383 | 0,051 | Limulus clotting factor C inhibitor                                                       |
| 0,368 | 0,036 | H <sup>+</sup> -exporting ATPase inhibitor                                                |
| 0,374 | 0,042 | Mannose isomerase inhibitor                                                               |
| 0,372 | 0,041 | CYP7 inhibitor                                                                            |
| 0,367 | 0,037 | Fructan beta-fructosidase inhibitor                                                       |
| 0,414 | 0,084 | Leukopoiesis stimulant                                                                    |
| 0,363 | 0,035 | CYP2B11 substrate                                                                         |
| 0,367 | 0,038 | Cyclomaltodextrinase inhibitor                                                            |
| 0,410 | 0,082 | Erythropoiesis stimulant                                                                  |
| 0,369 | 0,043 | Sulfite oxidase inhibitor                                                                 |
| 0,350 | 0,024 | Styrene-oxide isomerase inhibitor                                                         |
| 0,382 | 0,058 | Mucinamylserine mucinaminidase inhibitor                                                  |
| 0,348 | 0,025 | Phosphoenolpyruvate mutase inhibitor                                                      |
| 0,340 | 0,018 | Undecaprenyl-diphosphatase inhibitor                                                      |
| 0,393 | 0,070 | Polyamine-transporting ATPase inhibitor                                                   |
| 0,353 | 0,031 | Oxidizing agent                                                                           |
| 0,370 | 0,048 | Nitrite reductase (NO-forming) inhibitor                                                  |
| 0,380 | 0,059 | EIF4E expression inhibitor                                                                |
| 0,371 | 0,054 | CYP2D2 inhibitor                                                                          |
| 0,380 | 0,063 | Thymidylate 5'-phosphatase inhibitor                                                      |
| 0,405 | 0,089 | Neurotransmitter antagonist                                                               |
| 0,345 | 0,030 | D-alanine 2-hydroxymethyltransferase inhibitor                                            |
| 0,374 | 0,060 | GABA aminotransferase inhibitor                                                           |
| 0,368 | 0,054 | Steroid N-acetylglucosaminyltransferase inhibitor                                         |
| 0,392 | 0,079 | Arginine 2-monooxygenase inhibitor                                                        |
| 0,381 | 0,068 | Phenol O-methyltransferase inhibitor                                                      |
| 0,398 | 0,089 | (R)-6-hydroxynicotine oxidase inhibitor                                                   |

|       |       |                                                                              |
|-------|-------|------------------------------------------------------------------------------|
| 0,320 | 0,012 | Ligase inhibitor                                                             |
| 0,361 | 0,053 | Phosphopantothenoylcysteine decarboxylase inhibitor                          |
| 0,472 | 0,165 | Membrane permeability inhibitor                                              |
| 0,387 | 0,080 | Ecdysone 20-monooxygenase inhibitor                                          |
| 0,389 | 0,083 | CYP2A1 substrate                                                             |
| 0,372 | 0,068 | (S)-6-hydroxynicotine oxidase inhibitor                                      |
| 0,373 | 0,069 | Caspase 8 stimulant                                                          |
| 0,356 | 0,052 | Chitosanase inhibitor                                                        |
| 0,374 | 0,071 | Adenomatous polyposis treatment                                              |
| 0,430 | 0,127 | Membrane integrity agonist                                                   |
| 0,344 | 0,042 | Glyoxylate oxidase inhibitor                                                 |
| 0,338 | 0,037 | Carminative                                                                  |
| 0,357 | 0,056 | N-formylmethionyl-peptidase inhibitor                                        |
| 0,385 | 0,085 | Vasoprotector                                                                |
| 0,405 | 0,106 | Antiviral (Picornavirus)                                                     |
| 0,375 | 0,077 | Cl--transporting ATPase inhibitor                                            |
| 0,383 | 0,086 | 4-Nitrophenol 2-monooxygenase inhibitor                                      |
| 0,325 | 0,028 | Licheninase inhibitor                                                        |
| 0,344 | 0,048 | Dextranase inhibitor                                                         |
| 0,382 | 0,086 | Fibrolase inhibitor                                                          |
| 0,401 | 0,108 | Antinociceptive                                                              |
| 0,352 | 0,059 | Peptide-N4-(N-acetyl-beta-glucosaminy)asparagine amidase inhibitor           |
| 0,371 | 0,078 | Aspartate-phenylpyruvate transaminase inhibitor                              |
| 0,379 | 0,086 | Dimethylargininase inhibitor                                                 |
| 0,320 | 0,028 | Antiparkinsonian, tremor relieving                                           |
| 0,389 | 0,097 | Aminobutyraldehyde dehydrogenase inhibitor                                   |
| 0,318 | 0,026 | Fumarate reductase (NADH) inhibitor                                          |
| 0,329 | 0,038 | CYP2B10 substrate                                                            |
| 0,329 | 0,040 | 2,3,4,5-Tetrahydropyridine-2,6-dicarboxylate N-succinyltransferase inhibitor |
| 0,378 | 0,090 | Radiosensitizer                                                              |
| 0,333 | 0,045 | DELTA14-sterol reductase inhibitor                                           |
| 0,365 | 0,078 | Manganese peroxidase inhibitor                                               |
| 0,337 | 0,052 | Opioid kappa 3 receptor antagonist                                           |
| 0,365 | 0,081 | Pro-opiomelanocortin converting enzyme inhibitor                             |
| 0,347 | 0,064 | Phosphoinositide 5-phosphatase inhibitor                                     |
| 0,331 | 0,048 | CYP2A2 substrate                                                             |
| 0,324 | 0,042 | Quinoprotein glucose dehydrogenase inhibitor                                 |

|       |       |                                                             |
|-------|-------|-------------------------------------------------------------|
| 0,365 | 0,085 | Beta-adrenergic receptor kinase inhibitor                   |
| 0,365 | 0,085 | G-protein-coupled receptor kinase inhibitor                 |
| 0,340 | 0,062 | Creatininase inhibitor                                      |
| 0,346 | 0,067 | Prostaglandin-A1 DELTA-isomerase inhibitor                  |
| 0,357 | 0,079 | Centromere associated protein inhibitor                     |
| 0,309 | 0,031 | Galactolipase inhibitor                                     |
| 0,308 | 0,031 | Alkylglycerone-phosphate synthase inhibitor                 |
| 0,384 | 0,107 | Cytoprotectant                                              |
| 0,306 | 0,030 | Bisphosphoglycerate mutase inhibitor                        |
| 0,337 | 0,062 | Lysostaphin inhibitor                                       |
| 0,409 | 0,134 | CYP3A2 substrate                                            |
| 0,351 | 0,076 | Histidine N-acetyltransferase inhibitor                     |
| 0,423 | 0,148 | Calcium channel (voltage-sensitive) activator               |
| 0,320 | 0,046 | Antineoplastic (pancreatic cancer)                          |
| 0,353 | 0,080 | Glycerol-3-phosphate oxidase inhibitor                      |
| 0,336 | 0,062 | tRNA-pseudouridine synthase I inhibitor                     |
| 0,356 | 0,083 | Antimyopathies                                              |
| 0,350 | 0,079 | CYP2A8 substrate                                            |
| 0,309 | 0,042 | GST M substrate                                             |
| 0,303 | 0,037 | Alpha-N-acetylglucosaminidase inhibitor                     |
| 0,320 | 0,054 | Hematopoietic inhibitor                                     |
| 0,307 | 0,042 | Steroid synthesis inhibitor                                 |
| 0,349 | 0,084 | Membrane permeability enhancer                              |
| 0,350 | 0,086 | Sphinganine kinase inhibitor                                |
| 0,308 | 0,044 | Hyaluronic acid agonist                                     |
| 0,332 | 0,069 | RELA expression inhibitor                                   |
| 0,295 | 0,033 | Antineoplastic (small cell lung cancer)                     |
| 0,302 | 0,040 | Oryzin inhibitor                                            |
| 0,296 | 0,035 | Alkylglycerophosphoethanolamine phosphodiesterase inhibitor |
| 0,355 | 0,094 | Pancreatic elastase inhibitor                               |
| 0,282 | 0,022 | 2-Dehydropantoate aldolase inhibitor                        |
| 0,327 | 0,068 | Alcohol dehydrogenase (acceptor) inhibitor                  |
| 0,334 | 0,076 | Leukopoiesis inhibitor                                      |
| 0,293 | 0,036 | Polyneuridine-aldehyde esterase inhibitor                   |
| 0,338 | 0,081 | Tpr proteinase (Porphyromonas gingivalis) inhibitor         |
| 0,283 | 0,026 | Hydroxysteroid dehydrogenase inhibitor                      |
| 0,326 | 0,071 | Chitinase inhibitor                                         |

|       |       |                                                                 |
|-------|-------|-----------------------------------------------------------------|
| 0,321 | 0,067 | 3-Cyanoalanine hydratase inhibitor                              |
| 0,308 | 0,057 | Hydroxylamine reductase (NADH) inhibitor                        |
| 0,323 | 0,072 | Antifungal                                                      |
| 0,321 | 0,070 | Glutamine-phenylpyruvate transaminase inhibitor                 |
| 0,346 | 0,096 | Linoleate diol synthase inhibitor                               |
| 0,291 | 0,041 | N-Acyl-D-aspartate deacylase inhibitor                          |
| 0,299 | 0,050 | Linoleoyl-CoA desaturase inhibitor                              |
| 0,330 | 0,080 | Methylamine-glutamate N-methyltransferase inhibitor             |
| 0,291 | 0,043 | Protein-Npi-phosphohistidine-sugar phosphotransferase inhibitor |
| 0,360 | 0,112 | Histamine release stimulant                                     |
| 0,382 | 0,134 | 5 Hydroxytryptamine uptake stimulant                            |
| 0,358 | 0,111 | 2-Dehydropantoate 2-reductase inhibitor                         |
| 0,326 | 0,079 | CYP2F1 substrate                                                |
| 0,286 | 0,040 | Poly(alpha-L-guluronate) lyase inhibitor                        |
| 0,265 | 0,021 | Galacturan 1,4-alpha-galacturonidase inhibitor                  |
| 0,319 | 0,075 | ADP-thymidine kinase inhibitor                                  |
| 0,335 | 0,092 | Glucose oxidase inhibitor                                       |
| 0,286 | 0,042 | Pseudouridylate synthase inhibitor                              |
| 0,261 | 0,019 | Deoxyribonuclease I inhibitor                                   |
| 0,319 | 0,077 | Chenodeoxycholytaurine hydrolase inhibitor                      |
| 0,299 | 0,058 | Glycerol-3-phosphate dehydrogenase inhibitor                    |
| 0,302 | 0,061 | 2-Hydroxymuconate-semialdehyde hydrolase inhibitor              |
| 0,268 | 0,028 | Alpha-glucuronidase inhibitor                                   |
| 0,265 | 0,025 | Gamma-butyrobetaine dioxygenase inhibitor                       |
| 0,342 | 0,102 | Rubredoxin-NAD+ reductase inhibitor                             |
| 0,342 | 0,103 | Apoptosis agonist                                               |
| 0,319 | 0,082 | Fucoesterol-epoxide lyase inhibitor                             |
| 0,310 | 0,073 | 3-Phytase inhibitor                                             |
| 0,275 | 0,038 | RNA directed DNA polymerase inhibitor                           |
| 0,282 | 0,046 | Horriylsin inhibitor                                            |
| 0,263 | 0,028 | Tropinesterase inhibitor                                        |
| 0,309 | 0,076 | Adenylyl-sulfate reductase inhibitor                            |
| 0,305 | 0,072 | Phosphatidylserine decarboxylase inhibitor                      |
| 0,276 | 0,044 | Dopamine release stimulant                                      |
| 0,277 | 0,045 | Aspergillopepsin II inhibitor                                   |
| 0,304 | 0,071 | N-acylmannosamine kinase inhibitor                              |
| 0,260 | 0,029 | Cycloartenol synthase inhibitor                                 |

|       |       |                                                              |
|-------|-------|--------------------------------------------------------------|
| 0,273 | 0,042 | Rhodotorulapepsin inhibitor                                  |
| 0,334 | 0,103 | Biotinidase inhibitor                                        |
| 0,289 | 0,059 | NF-E2-related factor 2 stimulant                             |
| 0,278 | 0,048 | Chaperonin ATPase inhibitor                                  |
| 0,257 | 0,028 | Phosphoenolpyruvate-protein phosphotransferase inhibitor     |
| 0,297 | 0,069 | Cytostatic                                                   |
| 0,258 | 0,030 | Rhizopuspepsin inhibitor                                     |
| 0,282 | 0,054 | Adrenaline release stimulant                                 |
| 0,291 | 0,064 | Long-chain-aldehyde dehydrogenase inhibitor                  |
| 0,328 | 0,101 | S-formylglutathione hydrolase inhibitor                      |
| 0,282 | 0,055 | Levanase inhibitor                                           |
| 0,241 | 0,015 | Isoamylase inhibitor                                         |
| 0,299 | 0,075 | D-lactaldehyde dehydrogenase inhibitor                       |
| 0,316 | 0,092 | Sulfite dehydrogenase inhibitor                              |
| 0,392 | 0,168 | Antineurotic                                                 |
| 0,272 | 0,049 | 2-Oxoaldehyde dehydrogenase (NADP+) inhibitor                |
| 0,284 | 0,061 | Endothelial growth factor antagonist                         |
| 0,271 | 0,048 | UGT2B28 substrate                                            |
| 0,267 | 0,044 | Aldosterone antagonist                                       |
| 0,298 | 0,075 | Isopenicillin-N epimerase inhibitor                          |
| 0,265 | 0,043 | Anthranilate-CoA ligase inhibitor                            |
| 0,295 | 0,073 | Peptide alpha-N-acetyltransferase inhibitor                  |
| 0,361 | 0,140 | Thromboxane B2 antagonist                                    |
| 0,280 | 0,059 | Bisphosphoglycerate phosphatase inhibitor                    |
| 0,280 | 0,060 | Dipeptidase E inhibitor                                      |
| 0,289 | 0,069 | Glutamate-tRNA ligase inhibitor                              |
| 0,235 | 0,015 | Trehalose-phosphatase inhibitor                              |
| 0,261 | 0,042 | Vitamin-K-epoxide reductase (warfarin-insensitive) inhibitor |
| 0,282 | 0,063 | CYP2C29 substrate                                            |
| 0,256 | 0,037 | D-xylulose reductase inhibitor                               |
| 0,348 | 0,130 | Chlordecone reductase inhibitor                              |
| 0,268 | 0,050 | 2-Hydroxy-3-oxoadipate synthase inhibitor                    |
| 0,250 | 0,033 | 1,4-Alpha-glucan branching enzyme inhibitor                  |
| 0,262 | 0,045 | Mannitol-1-phosphatase inhibitor                             |
| 0,325 | 0,108 | CYP4A11 substrate                                            |
| 0,307 | 0,090 | Plastoquinol-plastocyanin reductase inhibitor                |
| 0,278 | 0,062 | Salicylate 1-monooxygenase inhibitor                         |

|       |       |                                                                          |
|-------|-------|--------------------------------------------------------------------------|
| 0,245 | 0,029 | BRAF expression inhibitor                                                |
| 0,317 | 0,101 | Hydroxylamine oxidase inhibitor                                          |
| 0,298 | 0,083 | Phosphatidylinositol diacylglycerol-lyase inhibitor                      |
| 0,270 | 0,056 | Benzaldehyde dehydrogenase (NADP+) inhibitor                             |
| 0,305 | 0,092 | Peptidyl-dipeptidase Dcp inhibitor                                       |
| 0,266 | 0,053 | Flavin-containing monooxygenase inhibitor                                |
| 0,278 | 0,066 | Transketolase inhibitor                                                  |
| 0,230 | 0,017 | Alpha-N-acetylgalactosaminidase inhibitor                                |
| 0,332 | 0,120 | CYP3A1 substrate                                                         |
| 0,275 | 0,062 | Gluconolactonase inhibitor                                               |
| 0,258 | 0,046 | N-acetyllactosaminide beta-1,3-N-acetylglucosaminyltransferase inhibitor |
| 0,278 | 0,066 | NADH kinase inhibitor                                                    |
| 0,245 | 0,034 | 3-Chloro-D-alanine dehydrochlorinase inhibitor                           |
| 0,248 | 0,037 | NAD+ synthase (glutamine-hydrolysing) inhibitor                          |
| 0,262 | 0,052 | Glutarate-semialdehyde dehydrogenase inhibitor                           |
| 0,338 | 0,130 | Pin1 inhibitor                                                           |
| 0,305 | 0,098 | (R)-Pantolactone dehydrogenase (flavin) inhibitor                        |
| 0,251 | 0,044 | Dynein ATPase inhibitor                                                  |
| 0,285 | 0,081 | CYP2A5 substrate                                                         |
| 0,251 | 0,046 | Cellulose 1,4-beta-cellobiosidase inhibitor                              |
| 0,320 | 0,116 | Antiseborrheic                                                           |
| 0,245 | 0,041 | Aureolysin inhibitor                                                     |
| 0,303 | 0,099 | Cyanoalanine nitrilase inhibitor                                         |
| 0,261 | 0,057 | Lactose synthase inhibitor                                               |
| 0,305 | 0,102 | Leukotriene-C4 synthase inhibitor                                        |
| 0,270 | 0,068 | Cystic fibrosis treatment                                                |
| 0,233 | 0,030 | Alkene monooxygenase inhibitor                                           |
| 0,252 | 0,051 | Prunasin beta-glucosidase inhibitor                                      |
| 0,257 | 0,057 | N-hydroxy-2-acetamidofluorene reductase inhibitor                        |
| 0,222 | 0,022 | Riboflavin phosphotransferase inhibitor                                  |
| 0,227 | 0,028 | Ferredoxin-NADP+ reductase inhibitor                                     |
| 0,311 | 0,112 | Malate dehydrogenase (acceptor) inhibitor                                |
| 0,241 | 0,042 | Aryldialkylphosphatase inhibitor                                         |
| 0,264 | 0,066 | Ethanolamine-phosphate cytidyltransferase inhibitor                      |
| 0,237 | 0,039 | Inulinase inhibitor                                                      |
| 0,284 | 0,086 | P-benzoquinone reductase (NADPH) inhibitor                               |
| 0,338 | 0,140 | Oxygen scavenger                                                         |

|       |       |                                                                                  |
|-------|-------|----------------------------------------------------------------------------------|
| 0,251 | 0,053 | Alpha-1,6-mannosyl-glycoprotein 4-beta-N-acetylglucosaminyltransferase inhibitor |
| 0,339 | 0,142 | MAP kinase stimulant                                                             |
| 0,244 | 0,049 | Polygalacturonase inhibitor                                                      |
| 0,251 | 0,056 | Pappalysin-1 inhibitor                                                           |
| 0,298 | 0,103 | MMP9 expression inhibitor                                                        |
| 0,225 | 0,030 | Glucan 1,6-alpha-glucosidase inhibitor                                           |
| 0,272 | 0,077 | Opioid dependency treatment                                                      |
| 0,310 | 0,116 | CYP2C9 inducer                                                                   |
| 0,245 | 0,051 | 3-Methylbutanal reductase inhibitor                                              |
| 0,291 | 0,097 | Antiviral (Adenovirus)                                                           |
| 0,235 | 0,042 | Glucan 1,4-beta-glucosidase inhibitor                                            |
| 0,227 | 0,034 | Glycerol-1-phosphatase inhibitor                                                 |
| 0,235 | 0,042 | Lactaldehyde reductase inhibitor                                                 |
| 0,221 | 0,028 | 2,2-Dialkylglycine decarboxylase (pyruvate) inhibitor                            |
| 0,262 | 0,070 | S-alkylcysteine lyase inhibitor                                                  |
| 0,273 | 0,081 | Aspergillus nuclease S1 inhibitor                                                |
| 0,268 | 0,077 | MAP kinase kinase 4 inhibitor                                                    |
| 0,236 | 0,045 | Snapalysin inhibitor                                                             |
| 0,244 | 0,053 | Glycine dehydrogenase (decarboxylating) inhibitor                                |
| 0,239 | 0,049 | Cyclooxygenase substrate                                                         |
| 0,213 | 0,024 | Estradiol 17alpha-dehydrogenase inhibitor                                        |
| 0,227 | 0,039 | 2-Haloacid dehalogenase (configuration-inverting) inhibitor                      |
| 0,253 | 0,065 | CYP2G1 substrate                                                                 |
| 0,225 | 0,037 | Aspartate-tRNA ligase inhibitor                                                  |
| 0,243 | 0,056 | GABA C receptor agonist                                                          |
| 0,276 | 0,089 | DNA-(apurinic or apyrimidinic site) lyase inhibitor                              |
| 0,250 | 0,064 | Antiperistaltic                                                                  |
| 0,273 | 0,088 | Antituberculosic                                                                 |
| 0,218 | 0,033 | Allantoate deiminase inhibitor                                                   |
| 0,222 | 0,037 | Bile-salt sulfotransferase inhibitor                                             |
| 0,214 | 0,030 | CYP2B18 substrate                                                                |
| 0,251 | 0,068 | Cyclohexyl-isocyanide hydratase inhibitor                                        |
| 0,300 | 0,117 | Endopeptidase So inhibitor                                                       |
| 0,276 | 0,093 | Lysyl oxidase inhibitor                                                          |
| 0,209 | 0,027 | Carnitine dehydratase inhibitor                                                  |
| 0,239 | 0,057 | Crotonoyl-[acyl-carrier-protein] hydratase inhibitor                             |
| 0,242 | 0,059 | Ornithine cyclodeaminase inhibitor                                               |

|       |       |                                                        |
|-------|-------|--------------------------------------------------------|
| 0,268 | 0,087 | 4-Coumarate-CoA ligase inhibitor                       |
| 0,221 | 0,041 | GABA B receptor agonist                                |
| 0,287 | 0,107 | Myc inhibitor                                          |
| 0,195 | 0,015 | CYP3A5 inducer                                         |
| 0,244 | 0,064 | N-acetyllactosamine synthase inhibitor                 |
| 0,212 | 0,032 | L-iduronidase inhibitor                                |
| 0,238 | 0,059 | N-(long-chain-acyl)ethanolamine deacylase inhibitor    |
| 0,216 | 0,038 | Cyclamate sulfohydrolase inhibitor                     |
| 0,251 | 0,072 | Glutathione dehydrogenase (ascorbate) inhibitor        |
| 0,247 | 0,069 | Alanine-tRNA ligase inhibitor                          |
| 0,269 | 0,091 | Methylumbelliferyl-acetate deacetylase inhibitor       |
| 0,209 | 0,033 | Glycopeptide alpha-N-acetylgalactosaminidase inhibitor |
| 0,209 | 0,033 | Glycerone-phosphate O-acyltransferase inhibitor        |
| 0,227 | 0,050 | Sedoheptulose-bisphosphatase inhibitor                 |
| 0,251 | 0,075 | Aspartate-ammonia ligase inhibitor                     |
| 0,210 | 0,034 | Pectate lyase inhibitor                                |
| 0,264 | 0,088 | Pyruvate decarboxylase inhibitor                       |
| 0,276 | 0,100 | CYP3A7 substrate                                       |
| 0,298 | 0,123 | Cytochrome P450 stimulant                              |
| 0,235 | 0,060 | Procollagen N-endopeptidase inhibitor                  |
| 0,251 | 0,077 | Transcription factor NF kappa A inhibitor              |
| 0,234 | 0,059 | Acyl-CoA oxidase inhibitor                             |
| 0,265 | 0,091 | N-benzyloxycarbonylglycine hydrolase inhibitor         |
| 0,260 | 0,086 | Antiviral (Poxvirus)                                   |
| 0,208 | 0,035 | Antineoplastic (ovarian cancer)                        |
| 0,209 | 0,036 | Retinyl-palmitate esterase inhibitor                   |
| 0,210 | 0,037 | Acetylenecarboxylate hydratase inhibitor               |
| 0,336 | 0,163 | Octopamine antagonist                                  |
| 0,177 | 0,005 | Cathepsin B inhibitor                                  |
| 0,290 | 0,119 | Antihelmintic (Nematodes)                              |
| 0,270 | 0,099 | Naphthalene 1,2-dioxygenase inhibitor                  |
| 0,270 | 0,099 | Ferredoxin-NAD+ reductase inhibitor                    |
| 0,223 | 0,052 | 2,3-Dihydroxyindole 2,3-dioxygenase inhibitor          |
| 0,252 | 0,081 | Carbon-monoxide dehydrogenase inhibitor                |
| 0,249 | 0,079 | Antiviral (CMV)                                        |
| 0,267 | 0,097 | Para amino benzoic acid antagonist                     |
| 0,248 | 0,078 | Cholestanetriol 26-monooxygenase inhibitor             |

|       |       |                                                               |
|-------|-------|---------------------------------------------------------------|
| 0,270 | 0,101 | Antimycobacterial                                             |
| 0,242 | 0,074 | Morphine 6-dehydrogenase inhibitor                            |
| 0,271 | 0,104 | Enteropeptidase inhibitor                                     |
| 0,183 | 0,017 | Demethylsterigmatocystin 6-O-methyltransferase inhibitor      |
| 0,216 | 0,050 | Sterol 3-beta-glucosyltransferase inhibitor                   |
| 0,284 | 0,118 | NAD(P)+-arginine ADP-ribosyltransferase inhibitor             |
| 0,234 | 0,068 | Antipruritic, non-allergic                                    |
| 0,197 | 0,031 | Protein-glucosylgalactosylhydroxylysine glucosidase inhibitor |
| 0,193 | 0,028 | Pectin lyase inhibitor                                        |
| 0,297 | 0,132 | Gonadotropin antagonist                                       |
| 0,223 | 0,058 | D-threo-aldose 1-dehydrogenase inhibitor                      |
| 0,311 | 0,147 | Antihypoxic                                                   |
| 0,327 | 0,163 | Fructose 5-dehydrogenase inhibitor                            |
| 0,207 | 0,044 | Nitric oxide scavenger                                        |
| 0,195 | 0,032 | Glucuronolactone reductase inhibitor                          |
| 0,234 | 0,071 | Carboxypeptidase D inhibitor                                  |
| 0,232 | 0,070 | Di-trans,poly-cis-decaprenylcistransferase inhibitor          |
| 0,204 | 0,042 | Glutamin-(asparagin-)ase inhibitor                            |
| 0,187 | 0,025 | (R)-limonene 6-monooxygenase inhibitor                        |
| 0,241 | 0,079 | Cell wall biosynthesis inhibitor                              |
| 0,257 | 0,096 | Thiosulfate dehydrogenase inhibitor                           |
| 0,282 | 0,122 | CYP3A4 inducer                                                |
| 0,196 | 0,037 | Thioredoxin reductase inhibitor                               |
| 0,256 | 0,097 | Immunostimulant                                               |
| 0,238 | 0,080 | Opheline kinase inhibitor                                     |
| 0,238 | 0,080 | Taurocyamine kinase inhibitor                                 |
| 0,231 | 0,073 | Dimethylmaleate hydratase inhibitor                           |
| 0,244 | 0,086 | Succinate-semialdehyde dehydrogenase [NAD(P)+] inhibitor      |
| 0,201 | 0,043 | Vascular adhesion protein 1 inhibitor                         |
| 0,282 | 0,125 | Lipoprotein lipase inhibitor                                  |
| 0,218 | 0,061 | Tauropine dehydrogenase inhibitor                             |
| 0,210 | 0,054 | Leucine dehydrogenase inhibitor                               |
| 0,285 | 0,130 | Glutathione thiolesterase inhibitor                           |
| 0,240 | 0,085 | NOS2 expression inhibitor                                     |
| 0,188 | 0,033 | Gaucher disease treatment                                     |
| 0,278 | 0,124 | 5 Hydroxytryptamine release stimulant                         |
| 0,234 | 0,080 | [acyl-carrier-protein] S-acetyltransferase inhibitor          |

|       |       |                                                             |
|-------|-------|-------------------------------------------------------------|
| 0,272 | 0,118 | CYP3A inducer                                               |
| 0,197 | 0,043 | Dolichyl-phosphatase inhibitor                              |
| 0,204 | 0,051 | Farnesyltranstransferase inhibitor                          |
| 0,181 | 0,028 | Dihydrouracil dehydrogenase (NAD+) inhibitor                |
| 0,194 | 0,042 | Ganglioside galactosyltransferase inhibitor                 |
| 0,233 | 0,080 | Prolyl aminopeptidase inhibitor                             |
| 0,185 | 0,032 | Endo-1,4-beta-xylanase inhibitor                            |
| 0,261 | 0,110 | Antiprotozoal (Amoeba)                                      |
| 0,222 | 0,072 | Glycerol 2-dehydrogenase (NADP+) inhibitor                  |
| 0,226 | 0,076 | Gamma-D-Glutamyl-meso-diaminopimelate peptidase inhibitor   |
| 0,293 | 0,143 | Caspase 3 stimulant                                         |
| 0,217 | 0,068 | UGT2B17 substrate                                           |
| 0,238 | 0,089 | Thiamine-triphosphatase inhibitor                           |
| 0,237 | 0,088 | Arylesterase inhibitor                                      |
| 0,205 | 0,056 | Serratia marcescens nuclease inhibitor                      |
| 0,289 | 0,140 | Nitrate reductase (cytochrome) inhibitor                    |
| 0,277 | 0,128 | CYP2E1 inducer                                              |
| 0,202 | 0,053 | Arachidonic acid antagonist                                 |
| 0,197 | 0,049 | Trans-pentaprenyltranstransferase inhibitor                 |
| 0,182 | 0,034 | Deoxyribose-phosphate aldolase inhibitor                    |
| 0,212 | 0,064 | Peptidyl-dipeptidase B inhibitor                            |
| 0,265 | 0,117 | Antiviral (Herpes)                                          |
| 0,190 | 0,042 | Saccharolysin inhibitor                                     |
| 0,212 | 0,064 | Guanosine-3',5'-bis(diphosphate) 3'-diphosphatase inhibitor |
| 0,242 | 0,095 | Thiamine pyridinylase inhibitor                             |
| 0,187 | 0,039 | Protein synthesis stimulant                                 |
| 0,185 | 0,039 | 3-Ketovalidoxylamine C-N-lyase inhibitor                    |
| 0,175 | 0,028 | Choloylglycine hydrolase inhibitor                          |
| 0,191 | 0,044 | Mannan endo-1,6-alpha-mannosidase inhibitor                 |
| 0,271 | 0,124 | Bilirubin oxidase inhibitor                                 |
| 0,226 | 0,081 | Meprin B inhibitor                                          |
| 0,170 | 0,024 | Aconitate decarboxylase inhibitor                           |
| 0,252 | 0,107 | Formate-dihydrofolate ligase inhibitor                      |
| 0,244 | 0,099 | Aldehyde dehydrogenase (pyrroloquinoline-quinone) inhibitor |
| 0,206 | 0,061 | (S)-3-amino-2-methylpropionate transaminase inhibitor       |
| 0,274 | 0,130 | Gamma-guanidinobutyraldehyde dehydrogenase inhibitor        |
| 0,189 | 0,044 | Testosterone 17beta-dehydrogenase inhibitor                 |

|       |       |                                                                      |
|-------|-------|----------------------------------------------------------------------|
| 0,226 | 0,084 | DNA ligase (ATP) inhibitor                                           |
| 0,186 | 0,044 | Polar-amino-acid-transporting ATPase inhibitor                       |
| 0,173 | 0,032 | Poly(3-hydroxybutyrate) depolymerase inhibitor                       |
| 0,182 | 0,041 | Allantoinase inhibitor                                               |
| 0,204 | 0,064 | Sweetener                                                            |
| 0,230 | 0,090 | Phosphatidylcholine-sterol O-acyltransferase inhibitor               |
| 0,168 | 0,028 | Glyceraldehyde-3-phosphate dehydrogenase (phosphorylating) inhibitor |
| 0,177 | 0,037 | Xylose isomerase inhibitor                                           |
| 0,146 | 0,006 | Anesthetic inhalation                                                |
| 0,224 | 0,085 | Glycine amidinotransferase inhibitor                                 |
| 0,254 | 0,115 | Antiinflammatory, intestinal                                         |
| 0,214 | 0,075 | CYP2A3 substrate                                                     |
| 0,242 | 0,103 | Leukotriene-B4 20-monooxygenase inhibitor                            |
| 0,197 | 0,059 | Alpha-amylase inhibitor                                              |
| 0,192 | 0,054 | ADP-ribosylarginine hydrolase inhibitor                              |
| 0,150 | 0,012 | Fatty-acyl-ethyl-ester synthase inhibitor                            |
| 0,179 | 0,041 | Pancreatic endopeptidase E inhibitor                                 |
| 0,184 | 0,046 | N-acetylneuraminate synthase inhibitor                               |
| 0,246 | 0,108 | Methylenetetrahydrofolate reductase (NADPH) inhibitor                |
| 0,282 | 0,144 | Amine dehydrogenase inhibitor                                        |
| 0,343 | 0,206 | Mucomembranous protector                                             |
| 0,189 | 0,053 | Laminaribiose phosphorylase inhibitor                                |
| 0,172 | 0,036 | Glucarate dehydratase inhibitor                                      |
| 0,231 | 0,095 | DNA-3-methyladenine glycosylase I inhibitor                          |
| 0,250 | 0,114 | 4-Hydroxymandelate oxidase inhibitor                                 |
| 0,253 | 0,117 | Nitrite reductase [NAD(P)H] inhibitor                                |
| 0,175 | 0,040 | Excitatory amino acid transporter EAAC1 inhibitor                    |
| 0,146 | 0,011 | Imidazoleglycerol-phosphate dehydratase inhibitor                    |
| 0,175 | 0,040 | Cholesterol oxidase inhibitor                                        |
| 0,197 | 0,063 | 4-Chlorobenzoyl-CoA dehalogenase inhibitor                           |
| 0,165 | 0,031 | Trimethyllysine dioxygenase inhibitor                                |
| 0,173 | 0,039 | Hepatocyte nuclear factor antagonist                                 |
| 0,173 | 0,039 | Hepatocyte nuclear factor 4 alpha antagonist                         |
| 0,154 | 0,020 | Deoxycytidine deaminase inhibitor                                    |
| 0,276 | 0,142 | Menopausal disorders treatment                                       |
| 0,179 | 0,046 | Alpha-N-arabinofuranosidase inhibitor                                |
| 0,237 | 0,104 | Cis-1,2-dihydro-1,2-dihydroxynaphthalene dehydrogenase inhibitor     |

|       |       |                                                                        |
|-------|-------|------------------------------------------------------------------------|
| 0,172 | 0,040 | Asparagine-tRNA ligase inhibitor                                       |
| 0,183 | 0,051 | Galactokinase inhibitor                                                |
| 0,250 | 0,118 | Arylsulfate sulfotransferase inhibitor                                 |
| 0,207 | 0,075 | Ubiquitin thiolesterase inhibitor                                      |
| 0,293 | 0,161 | Nicotine dehydrogenase inhibitor                                       |
| 0,174 | 0,043 | N-(5-amino-5-carboxypentanoyl)-L-cysteinyl-D-valine synthase inhibitor |
| 0,146 | 0,016 | Mycodextranase inhibitor                                               |
| 0,265 | 0,134 | Mitochondrial processing peptidase inhibitor                           |
| 0,193 | 0,063 | Tentoxilysin inhibitor                                                 |
| 0,205 | 0,075 | Serine-pyruvate transaminase inhibitor                                 |
| 0,223 | 0,093 | Antiprotozoal (Trichomonas)                                            |
| 0,168 | 0,039 | Antineoplastic (gastric cancer)                                        |
| 0,161 | 0,031 | 4-Alpha-glucanotransferase inhibitor                                   |
| 0,191 | 0,061 | Isopenicillin-N synthase inhibitor                                     |
| 0,240 | 0,111 | ICAM1 expression inhibitor                                             |
| 0,162 | 0,033 | (S)-carnitine 3-dehydrogenase inhibitor                                |
| 0,205 | 0,076 | Antileukemic                                                           |
| 0,170 | 0,041 | Acyl-lysine deacylase inhibitor                                        |
| 0,191 | 0,063 | Antirickettsial                                                        |
| 0,203 | 0,077 | Cyclopropane-fatty-acyl-phospholipid synthase inhibitor                |
| 0,200 | 0,073 | Signal peptidase I inhibitor                                           |
| 0,181 | 0,055 | Ferrochelataase inhibitor                                              |
| 0,167 | 0,041 | Serine 3-dehydrogenase inhibitor                                       |
| 0,141 | 0,016 | Gentamicin 2''-nucleotidyltransferase inhibitor                        |
| 0,182 | 0,057 | Penicillopepsin inhibitor                                              |
| 0,158 | 0,033 | Creatinase inhibitor                                                   |
| 0,188 | 0,063 | Glyoxylate reductase (NADP+) inhibitor                                 |
| 0,188 | 0,064 | Sphinganine-1-phosphate aldolase inhibitor                             |
| 0,193 | 0,068 | Picornain 3C inhibitor                                                 |
| 0,148 | 0,024 | D-proline reductase (dithiol) inhibitor                                |
| 0,159 | 0,036 | Pregnane X receptor agonist                                            |
| 0,148 | 0,024 | Shab potassium channel blocker                                         |
| 0,151 | 0,028 | Thermomycolin inhibitor                                                |
| 0,150 | 0,027 | Succinate dehydrogenase inhibitor                                      |
| 0,181 | 0,058 | Choline-sulfatase inhibitor                                            |
| 0,190 | 0,067 | 3-Hydroxy-4-oxoquinoline 2,4-dioxygenase inhibitor                     |
| 0,216 | 0,093 | Uroporphyrinogen-III synthase inhibitor                                |

|       |       |                                                                                 |
|-------|-------|---------------------------------------------------------------------------------|
| 0,168 | 0,047 | Valine decarboxylase inhibitor                                                  |
| 0,131 | 0,009 | Osmotic diuretic                                                                |
| 0,189 | 0,067 | Glutamate 5-kinase inhibitor                                                    |
| 0,187 | 0,066 | Acaricide                                                                       |
| 0,159 | 0,039 | Fructose-2,6-bisphosphate 2-phosphatase inhibitor                               |
| 0,154 | 0,034 | Antineoplastic, alkylator                                                       |
| 0,195 | 0,075 | Threonine aldolase inhibitor                                                    |
| 0,183 | 0,063 | N-acetylneuraminate 4-O-acetyltransferase inhibitor                             |
| 0,141 | 0,021 | Phosphatidylinositol 3-kinase stimulant                                         |
| 0,175 | 0,055 | Galactose oxidase inhibitor                                                     |
| 0,218 | 0,098 | Coccolysin inhibitor                                                            |
| 0,246 | 0,126 | Alkane 1-monooxygenase inhibitor                                                |
| 0,215 | 0,096 | Oxytocic                                                                        |
| 0,136 | 0,018 | High-mannose-oligosaccharide beta-1,4-N-acetylglucosaminyltransferase inhibitor |
| 0,151 | 0,033 | Choline dehydrogenase inhibitor                                                 |
| 0,206 | 0,088 | Bothrolysin inhibitor                                                           |
| 0,162 | 0,043 | Methionine decarboxylase inhibitor                                              |
| 0,175 | 0,057 | 3-Carboxyethylcatechol 2,3-dioxygenase inhibitor                                |
| 0,164 | 0,046 | CDP-diacylglycerol-inositol 3-phosphatidyltransferase inhibitor                 |
| 0,161 | 0,043 | Glutamate-1-semialdehyde 2,1-aminomutase inhibitor                              |
| 0,131 | 0,013 | Acetylcholine M3 receptor agonist                                               |
| 0,201 | 0,083 | Diabetic nephropathy treatment                                                  |
| 0,182 | 0,063 | IgA-specific metalloendopeptidase inhibitor                                     |
| 0,144 | 0,026 | Beta-amylase inhibitor                                                          |
| 0,159 | 0,041 | Carboxymethylenebutenolidase inhibitor                                          |
| 0,209 | 0,092 | Nardilysin inhibitor                                                            |
| 0,245 | 0,128 | HMOX1 expression enhancer                                                       |
| 0,172 | 0,056 | Methyltransferase substrate                                                     |
| 0,146 | 0,030 | 2-Dehydropantolactone reductase (A-specific) inhibitor                          |
| 0,127 | 0,012 | Alpha,alpha-trehalose phosphorylase inhibitor                                   |
| 0,131 | 0,016 | 11-Cis-retinyl-palmitate hydrolase inhibitor                                    |
| 0,190 | 0,075 | CYP4A2 substrate                                                                |
| 0,283 | 0,169 | RNA-directed RNA polymerase inhibitor                                           |
| 0,170 | 0,056 | Glutamate (mGluR5) agonist                                                      |
| 0,194 | 0,080 | 2,6-Dihydroxypyridine 3-monooxygenase inhibitor                                 |
| 0,146 | 0,033 | Nicotinamide-nucleotide adenyltransferase inhibitor                             |
| 0,176 | 0,063 | Vomilenine glucosyltransferase inhibitor                                        |

|       |       |                                                                |
|-------|-------|----------------------------------------------------------------|
| 0,148 | 0,036 | D-arabinonolactone oxidase inhibitor                           |
| 0,133 | 0,020 | Alternansucrase inhibitor                                      |
| 0,233 | 0,121 | RNA synthesis inhibitor                                        |
| 0,191 | 0,079 | Phosphatidylglycerophosphatase inhibitor                       |
| 0,180 | 0,068 | Mitochondrial intermediate peptidase inhibitor                 |
| 0,224 | 0,112 | ATP phosphoribosyltransferase inhibitor                        |
| 0,194 | 0,082 | Antihematotoxic                                                |
| 0,159 | 0,047 | Acetyl-CoA C-acyltransferase inhibitor                         |
| 0,176 | 0,065 | tRNA nucleotidyltransferase inhibitor                          |
| 0,142 | 0,031 | Glutamine-pyruvate transaminase inhibitor                      |
| 0,294 | 0,184 | 2-Hydroxyquinoline 8-monooxygenase inhibitor                   |
| 0,137 | 0,027 | Rhodopsin kinase inhibitor                                     |
| 0,143 | 0,032 | Valine dehydrogenase (NADP+) inhibitor                         |
| 0,167 | 0,057 | Geranylgeranyl-diphosphate geranylgeranyltransferase inhibitor |
| 0,234 | 0,124 | 4-Methoxybenzoate monooxygenase (O-demethylating) inhibitor    |
| 0,217 | 0,108 | CYP2C3 substrate                                               |
| 0,187 | 0,078 | UGT2B10 substrate                                              |
| 0,180 | 0,071 | UGT1A5 substrate                                               |
| 0,131 | 0,023 | Homoserine O-succinyltransferase inhibitor                     |
| 0,134 | 0,025 | Fructuronate reductase inhibitor                               |
| 0,134 | 0,025 | Tagaturonate reductase inhibitor                               |
| 0,142 | 0,034 | DELTA24-sterol reductase inhibitor                             |
| 0,187 | 0,080 | 2-Enoate reductase inhibitor                                   |
| 0,149 | 0,043 | Phosphonoacetate hydrolase inhibitor                           |
| 0,201 | 0,094 | Methanol dehydrogenase inhibitor                               |
| 0,140 | 0,033 | Glucan 1,3-beta-glucosidase inhibitor                          |
| 0,177 | 0,071 | Microtubule formation inhibitor                                |
| 0,200 | 0,094 | Carnitinamidase inhibitor                                      |
| 0,140 | 0,035 | Secretase alpha stimulant                                      |
| 0,140 | 0,035 | Secretase stimulant                                            |
| 0,180 | 0,074 | N-acetyl-gamma-glutamyl-phosphate reductase inhibitor          |
| 0,160 | 0,055 | 3-Oxadipate enol-lactonase inhibitor                           |
| 0,140 | 0,036 | Malonate-semialdehyde dehydrogenase inhibitor                  |
| 0,198 | 0,094 | Hyponitrite reductase inhibitor                                |
| 0,148 | 0,044 | Glycosylphosphatidylinositol diacylglycerol-lyase inhibitor    |
| 0,121 | 0,017 | 2-Dehydro-3-deoxy-phosphogluconate aldolase inhibitor          |
| 0,123 | 0,019 | Ca <sup>2+</sup> -transporting ATPase inhibitor                |

|       |       |                                                       |
|-------|-------|-------------------------------------------------------|
| 0,141 | 0,037 | Deoxyribonuclease X inhibitor                         |
| 0,180 | 0,076 | Rhamnulose-1-phosphate aldolase inhibitor             |
| 0,186 | 0,083 | Phenylalanine(histidine) transaminase inhibitor       |
| 0,133 | 0,030 | Isomaltulose synthase inhibitor                       |
| 0,224 | 0,121 | AR expression inhibitor                               |
| 0,230 | 0,127 | Urethanase inhibitor                                  |
| 0,130 | 0,027 | Ribose-5-phosphate-ammonia ligase inhibitor           |
| 0,170 | 0,067 | 3'-Nucleotidase inhibitor                             |
| 0,200 | 0,097 | Bontoxilysin inhibitor                                |
| 0,268 | 0,165 | Spermidine dehydrogenase inhibitor                    |
| 0,181 | 0,079 | CYP4F2 substrate                                      |
| 0,177 | 0,075 | 2,4-Diaminopentanoate dehydrogenase inhibitor         |
| 0,177 | 0,075 | 3-Hydroxybutyryl-CoA dehydrogenase inhibitor          |
| 0,177 | 0,075 | Lysine 6-dehydrogenase inhibitor                      |
| 0,168 | 0,066 | Allantoin racemase inhibitor                          |
| 0,148 | 0,046 | Beta-mannosidase inhibitor                            |
| 0,129 | 0,027 | Arabinose isomerase inhibitor                         |
| 0,111 | 0,010 | Phosphatidylinositol 3-kinase beta inhibitor          |
| 0,115 | 0,014 | Arabinogalactan endo-1,4-beta-galactosidase inhibitor |
| 0,150 | 0,049 | 2-Oxoisovalerate dehydrogenase (acylating) inhibitor  |
| 0,229 | 0,128 | Venom exonuclease inhibitor                           |
| 0,185 | 0,085 | Gallate decarboxylase inhibitor                       |
| 0,111 | 0,012 | Inositol 1,4,5-triphosphate receptor antagonist       |
| 0,139 | 0,040 | Fructose-2,6-bisphosphate 6-phosphatase inhibitor     |
| 0,166 | 0,067 | Calcium-sensing receptor agonist                      |
| 0,167 | 0,068 | Granzyme A inhibitor                                  |
| 0,205 | 0,107 | Eye irritation, inactive                              |
| 0,208 | 0,111 | Antifibrinolytic                                      |
| 0,283 | 0,186 | Preneoplastic conditions treatment                    |
| 0,123 | 0,026 | 2-Methyleneglutarate mutase inhibitor                 |
| 0,219 | 0,123 | 4-Nitrophenylphosphatase inhibitor                    |
| 0,160 | 0,065 | Homoserine dehydrogenase inhibitor                    |
| 0,111 | 0,015 | Alpha,alpha-phosphotrehalase inhibitor                |
| 0,215 | 0,120 | Myosin ATPase inhibitor                               |
| 0,126 | 0,031 | 3-Deoxy-8-phosphooctulonate synthase inhibitor        |
| 0,147 | 0,052 | D-lactate dehydrogenase inhibitor                     |
| 0,136 | 0,040 | Cytochrome-c3 hydrogenase inhibitor                   |

|       |       |                                                          |
|-------|-------|----------------------------------------------------------|
| 0,169 | 0,073 | Protein synthesis inhibitor                              |
| 0,142 | 0,047 | Lactaldehyde reductase (NADPH) inhibitor                 |
| 0,152 | 0,057 | Diisopropyl-fluorophosphatase inhibitor                  |
| 0,138 | 0,044 | Omega-amidase inhibitor                                  |
| 0,142 | 0,048 | CYP19 substrate                                          |
| 0,158 | 0,064 | Cerebroside-sulfatase inhibitor                          |
| 0,132 | 0,039 | Phosphofructokinase-1 inhibitor                          |
| 0,132 | 0,039 | Sorbose dehydrogenase inhibitor                          |
| 0,167 | 0,074 | Lactate 2-monooxygenase inhibitor                        |
| 0,101 | 0,008 | Glutamate (mGluR3) agonist                               |
| 0,150 | 0,057 | Glutathione S-transferase substrate                      |
| 0,193 | 0,100 | Nucleoside oxidase (H2O2-forming) inhibitor              |
| 0,166 | 0,073 | Tetrahydroxynaphthalene reductase inhibitor              |
| 0,175 | 0,082 | Biotin-CoA ligase inhibitor                              |
| 0,175 | 0,082 | Triacetate-lactonase inhibitor                           |
| 0,175 | 0,082 | 6-Carboxyhexanoate-CoA ligase inhibitor                  |
| 0,175 | 0,082 | Homoaconitate hydratase inhibitor                        |
| 0,158 | 0,066 | Lipotropic                                               |
| 0,177 | 0,085 | Camphor 1,2-monooxygenase inhibitor                      |
| 0,132 | 0,040 | Gluconate dehydratase inhibitor                          |
| 0,165 | 0,073 | Pyruvate dehydrogenase (cytochrome) inhibitor            |
| 0,165 | 0,073 | Trans-2-enoyl-CoA reductase (NAD+) inhibitor             |
| 0,176 | 0,084 | Metallo-carboxypeptidase D inhibitor                     |
| 0,145 | 0,054 | GABA inverse agonist                                     |
| 0,145 | 0,054 | GABA A inverse agonist                                   |
| 0,182 | 0,090 | Antihypotensive                                          |
| 0,158 | 0,067 | Gly-X carboxypeptidase inhibitor                         |
| 0,282 | 0,191 | Sulfur reductase inhibitor                               |
| 0,127 | 0,036 | 1,5-Anhydro-D-fructose reductase inhibitor               |
| 0,164 | 0,073 | N6-methyl-lysine oxidase inhibitor                       |
| 0,117 | 0,027 | 2-Methylcitrate dehydratase inhibitor                    |
| 0,194 | 0,103 | Alcohol dehydrogenase [NAD(P)+] inhibitor                |
| 0,129 | 0,039 | Glycerophosphocholine cholinephosphodiesterase inhibitor |
| 0,114 | 0,025 | Heme oxygenase inhibitor                                 |
| 0,156 | 0,067 | Melanin inhibitor                                        |
| 0,115 | 0,026 | Inositol-3-phosphate synthase inhibitor                  |
| 0,093 | 0,004 | Protein phosphatase 2A inhibitor                         |

|       |       |                                                                                            |
|-------|-------|--------------------------------------------------------------------------------------------|
| 0,150 | 0,061 | Iron-cytochrome-c reductase inhibitor                                                      |
| 0,151 | 0,062 | Cellulase inhibitor                                                                        |
| 0,119 | 0,030 | Phosphatidylglycerol-membrane-oligosaccharide glycerophosphotransferase inhibitor          |
| 0,129 | 0,040 | Aerobactin synthase inhibitor                                                              |
| 0,167 | 0,078 | Antineoplastic (renal cancer)                                                              |
| 0,137 | 0,049 | 2-Aminoacidipate transaminase inhibitor                                                    |
| 0,127 | 0,039 | 2-Aminoethylphosphonate-pyruvate transaminase inhibitor                                    |
| 0,139 | 0,051 | UDP-N-acetylglucosamine-dolichyl-phosphate N-acetylglucosaminophosphotransferase inhibitor |
| 0,119 | 0,031 | Platelet activating factor beta antagonist                                                 |
| 0,151 | 0,063 | Phosphoinositide phospholipase C inhibitor                                                 |
| 0,131 | 0,043 | DNA nucleotidylexotransferase inhibitor                                                    |
| 0,187 | 0,100 | Retinal dehydrogenase inhibitor                                                            |
| 0,121 | 0,034 | Ketohexokinase inhibitor                                                                   |
| 0,125 | 0,038 | Beta-D-fucosidase inhibitor                                                                |
| 0,121 | 0,034 | Glyceraldehyde-3-phosphate dehydrogenase (NADP+) inhibitor                                 |
| 0,165 | 0,079 | Carnosine synthase inhibitor                                                               |
| 0,190 | 0,104 | Glutaminase inhibitor                                                                      |
| 0,117 | 0,031 | Beta-N-acetylgalactosaminidase inhibitor                                                   |
| 0,117 | 0,031 | CYP4F substrate                                                                            |
| 0,120 | 0,035 | Proline dehydrogenase inhibitor                                                            |
| 0,115 | 0,029 | L-fuconate dehydratase inhibitor                                                           |
| 0,133 | 0,047 | Diacylglycerol kinase inhibitor                                                            |
| 0,144 | 0,059 | Allophanate hydrolase inhibitor                                                            |
| 0,147 | 0,062 | Valine-tRNA ligase inhibitor                                                               |
| 0,132 | 0,047 | Lysozyme inhibitor                                                                         |
| 0,143 | 0,058 | Prepilin peptidase inhibitor                                                               |
| 0,143 | 0,058 | Haloacetate dehalogenase inhibitor                                                         |
| 0,152 | 0,067 | UGT2B18 substrate                                                                          |
| 0,151 | 0,066 | Alpha-Methylacyl-CoA racemase inhibitor                                                    |
| 0,143 | 0,058 | Selenocysteine lyase inhibitor                                                             |
| 0,107 | 0,022 | Alpha,alpha-trehalose phosphorylase (configuration-retaining) inhibitor                    |
| 0,201 | 0,116 | CYP2B2 substrate                                                                           |
| 0,154 | 0,070 | 3-Aminobutyryl-CoA ammonia-lyase inhibitor                                                 |
| 0,220 | 0,136 | Cytochrome-b5 reductase inhibitor                                                          |
| 0,297 | 0,213 | TP53 expression enhancer                                                                   |
| 0,116 | 0,032 | Ribonuclease U2 inhibitor                                                                  |

|       |       |                                                       |
|-------|-------|-------------------------------------------------------|
| 0,125 | 0,041 | Homocysteine desulfhydrase inhibitor                  |
| 0,210 | 0,126 | Cyclic AMP modulator                                  |
| 0,115 | 0,031 | Beta-glucosidase inhibitor                            |
| 0,243 | 0,159 | CYP3A3 substrate                                      |
| 0,113 | 0,029 | Amino-acid racemase inhibitor                         |
| 0,228 | 0,144 | Tyrosine 3 hydroxylase inhibitor                      |
| 0,121 | 0,037 | Bis(5'-adenosyl)-triphosphatase inhibitor             |
| 0,120 | 0,037 | 2-Hydroxy-3-oxopropionate reductase inhibitor         |
| 0,201 | 0,119 | UGT2B4 substrate                                      |
| 0,101 | 0,018 | Chitin deacetylase inhibitor                          |
| 0,135 | 0,053 | NAD+ kinase inhibitor                                 |
| 0,164 | 0,082 | GST M1-1 substrate                                    |
| 0,129 | 0,047 | 1-Aminocyclopropane-1-carboxylate deaminase inhibitor |
| 0,135 | 0,054 | Poly(ADP-ribose) glycohydrolase inhibitor             |
| 0,163 | 0,082 | 6-Pyruvoyltetrahydropterin synthase inhibitor         |
| 0,120 | 0,038 | Dichloromuconate cycloisomerase inhibitor             |
| 0,108 | 0,026 | Alpha-L-fucosidase inhibitor                          |
| 0,137 | 0,055 | Mevalonate kinase inhibitor                           |
| 0,156 | 0,076 | Phenylacetate-CoA ligase inhibitor                    |
| 0,116 | 0,035 | 3-Oxosteroid 1-dehydrogenase inhibitor                |
| 0,154 | 0,073 | SMN2 expression enhancer                              |
| 0,149 | 0,068 | Aldehyde ferredoxin oxidoreductase inhibitor          |
| 0,109 | 0,029 | Alpha-L-rhamnosidase inhibitor                        |
| 0,181 | 0,101 | Sulfite reductase inhibitor                           |
| 0,166 | 0,086 | Penicillin amidase inhibitor                          |
| 0,138 | 0,058 | Urolithiasis treatment                                |
| 0,163 | 0,083 | 4-Hydroxyglutamate transaminase inhibitor             |
| 0,173 | 0,093 | Urate-ribonucleotide phosphorylase inhibitor          |
| 0,142 | 0,062 | Galactose 1-dehydrogenase (NADP+) inhibitor           |
| 0,142 | 0,062 | Beta-alanine-pyruvate transaminase inhibitor          |
| 0,116 | 0,036 | N-acetylneuraminate lyase inhibitor                   |
| 0,154 | 0,074 | 2-Acylglycerol O-acyltransferase inhibitor            |
| 0,095 | 0,016 | NMDA receptor polyamine site agonist                  |
| 0,136 | 0,057 | ATP adenylyltransferase inhibitor                     |
| 0,141 | 0,062 | 8-Amino-7-oxononanoate synthase inhibitor             |
| 0,136 | 0,057 | CYP26A substrate                                      |
| 0,114 | 0,035 | Gluconokinase inhibitor                               |

|       |       |                                                           |
|-------|-------|-----------------------------------------------------------|
| 0,206 | 0,128 | Indanol dehydrogenase inhibitor                           |
| 0,137 | 0,059 | Agmatinase inhibitor                                      |
| 0,142 | 0,064 | Thiamine-phosphate kinase inhibitor                       |
| 0,125 | 0,047 | Glutamate N-acetyltransferase inhibitor                   |
| 0,103 | 0,025 | (S)-2-Methylmalate dehydratase inhibitor                  |
| 0,122 | 0,044 | NMDA receptor polyamine site antagonist                   |
| 0,161 | 0,083 | Creatinine deaminase inhibitor                            |
| 0,157 | 0,079 | Allyl-alcohol dehydrogenase inhibitor                     |
| 0,208 | 0,131 | Gingipain K inhibitor                                     |
| 0,263 | 0,186 | Antipruritic, allergic                                    |
| 0,126 | 0,048 | Heparan-alpha-glucosaminide N-acetyltransferase inhibitor |
| 0,127 | 0,050 | Guanidinodeoxy-scylo-inositol-4-phosphatase inhibitor     |
| 0,138 | 0,061 | Biotin carboxylase inhibitor                              |
| 0,190 | 0,112 | Aromatic-hydroxylamine O-acetyltransferase inhibitor      |
| 0,141 | 0,063 | Aminocarboxymuconate-semialdehyde decarboxylase inhibitor |
| 0,158 | 0,081 | Lipoxygenase substrate                                    |
| 0,178 | 0,101 | Dihydroxy-acid dehydratase inhibitor                      |
| 0,169 | 0,092 | Antiprotozoal (Plasmodium)                                |
| 0,164 | 0,087 | Acetylornithine deacetylase inhibitor                     |
| 0,174 | 0,097 | Coenzyme-B sulfoethylthiotransferase inhibitor            |
| 0,125 | 0,049 | Galactoside 2-alpha-L-fucosyltransferase inhibitor        |
| 0,163 | 0,088 | Aldehyde dehydrogenase 2 substrate                        |
| 0,241 | 0,166 | Retinoic acid metabolism inhibitor                        |
| 0,159 | 0,083 | 2,4-Dichlorophenol 6-monooxygenase inhibitor              |
| 0,112 | 0,037 | 2-Dehydro-3-deoxy-L-arabinonate dehydratase inhibitor     |
| 0,181 | 0,106 | Opine dehydrogenase inhibitor                             |
| 0,157 | 0,082 | UGT2B9 substrate                                          |
| 0,164 | 0,090 | Glutathione peroxidase inhibitor                          |
| 0,092 | 0,018 | Alpha-mannosidase inhibitor                               |
| 0,108 | 0,034 | Squalene-hopene cyclase inhibitor                         |
| 0,105 | 0,031 | Xylan 1,4-beta-xylosidase inhibitor                       |
| 0,203 | 0,130 | Gamma-glutamyltransferase inhibitor                       |
| 0,186 | 0,112 | Histidinol dehydrogenase inhibitor                        |
| 0,155 | 0,082 | Aspartoacylase inhibitor                                  |
| 0,120 | 0,047 | UDP-glucose 4-epimerase inhibitor                         |
| 0,123 | 0,050 | Pantothenase inhibitor                                    |
| 0,140 | 0,067 | Phenylpyruvate decarboxylase inhibitor                    |

|       |       |                                                                                  |
|-------|-------|----------------------------------------------------------------------------------|
| 0,153 | 0,081 | Adenylate cyclase stimulant                                                      |
| 0,165 | 0,092 | Antihelminthic (Fasciola)                                                        |
| 0,186 | 0,114 | Ferredoxin hydrogenase inhibitor                                                 |
| 0,107 | 0,035 | Galactosylgalactosylglucosylceramidase inhibitor                                 |
| 0,114 | 0,042 | Globoside alpha-N-acetylgalactosaminyltransferase inhibitor                      |
| 0,244 | 0,172 | Superoxide dismutase inhibitor                                                   |
| 0,115 | 0,043 | Lysine decarboxylase inhibitor                                                   |
| 0,109 | 0,037 | 3-Isopropylmalate dehydrogenase inhibitor                                        |
| 0,096 | 0,024 | CYP4F12 substrate                                                                |
| 0,121 | 0,050 | Chondroitin 6-sulfotransferase inhibitor                                         |
| 0,134 | 0,062 | O-acetylhomoserine aminocarboxypropyltransferase inhibitor                       |
| 0,134 | 0,062 | Interferon gamma antagonist                                                      |
| 0,136 | 0,065 | Interferon antagonist                                                            |
| 0,147 | 0,076 | Aldehyde dehydrogenase (NADP+) inhibitor                                         |
| 0,170 | 0,099 | Indoleacetaldoxime dehydratase inhibitor                                         |
| 0,131 | 0,060 | Isovaleryl-CoA dehydrogenase inhibitor                                           |
| 0,151 | 0,081 | Pyridoxine 4-oxidase inhibitor                                                   |
| 0,111 | 0,041 | Cell wall synthesis inhibitor                                                    |
| 0,141 | 0,071 | 2-Oxoglutarate decarboxylase inhibitor                                           |
| 0,120 | 0,051 | Leucine transaminase inhibitor                                                   |
| 0,226 | 0,156 | 4-Hydroxyproline epimerase inhibitor                                             |
| 0,252 | 0,182 | N-hydroxyarylamine O-acetyltransferase inhibitor                                 |
| 0,187 | 0,118 | Peroxidase substrate                                                             |
| 0,132 | 0,063 | Glucan endo-1,3-alpha-glucosidase inhibitor                                      |
| 0,157 | 0,088 | CDP-4-dehydro-6-deoxyglucose reductase inhibitor                                 |
| 0,122 | 0,052 | UGT2B11 substrate                                                                |
| 0,160 | 0,091 | Glycine C-acetyltransferase inhibitor                                            |
| 0,099 | 0,030 | Long-chain-fatty-acid-CoA ligase inhibitor                                       |
| 0,117 | 0,048 | D-glutamate oxidase inhibitor                                                    |
| 0,102 | 0,034 | Homospermidine synthase inhibitor                                                |
| 0,097 | 0,028 | Alpha-1,6-mannosyl-glycoprotein 6-beta-N-acetylglucosaminyltransferase inhibitor |
| 0,129 | 0,061 | NAD(P)+ transhydrogenase (B-specific) inhibitor                                  |
| 0,128 | 0,060 | Neurotrophin inhibitor                                                           |
| 0,160 | 0,092 | Stromelysin 2 inhibitor                                                          |
| 0,158 | 0,091 | Hydroxymethylglutaryl-CoA lyase inhibitor                                        |
| 0,160 | 0,092 | Arylacetonitrilase inhibitor                                                     |
| 0,159 | 0,092 | Dolichol kinase inhibitor                                                        |

|       |       |                                                                |
|-------|-------|----------------------------------------------------------------|
| 0,072 | 0,005 | Antimitotic, Podophyllotoxin-like                              |
| 0,285 | 0,218 | Taurine dehydrogenase inhibitor                                |
| 0,101 | 0,035 | [hydroxymethylglutaryl-CoA reductase (NADPH)] kinase inhibitor |
| 0,139 | 0,072 | CYP4B substrate                                                |
| 0,124 | 0,058 | L-lysine 6-transaminase inhibitor                              |
| 0,221 | 0,154 | Analgesic stimulant                                            |
| 0,087 | 0,020 | 3-Alpha-hydroxysteroid dehydrogenase (B-specific) inhibitor    |
| 0,198 | 0,132 | Cathepsin T inhibitor                                          |
| 0,131 | 0,065 | (S)-2-hydroxy-acid oxidase inhibitor                           |
| 0,128 | 0,062 | Iduronate-2-sulfatase inhibitor                                |
| 0,124 | 0,058 | Glycoprotein 3-alpha-L-fucosyltransferase inhibitor            |
| 0,098 | 0,033 | 6-Phosphofructo-2-kinase inhibitor                             |
| 0,126 | 0,060 | D-2-hydroxy-acid dehydrogenase inhibitor                       |
| 0,179 | 0,114 | Indolepyruvate C-methyltransferase inhibitor                   |
| 0,171 | 0,106 | Mucolytic                                                      |
| 0,147 | 0,082 | Aminopeptidase Y inhibitor                                     |
| 0,127 | 0,063 | N4-(beta-N-acetylglucosaminy)-L-asparaginase inhibitor         |
| 0,235 | 0,171 | Loop diuretic                                                  |
| 0,104 | 0,039 | Phosphoenolpyruvate carboxykinase (diphosphate) inhibitor      |
| 0,156 | 0,092 | CYP2D1 substrate                                               |
| 0,134 | 0,070 | Antineoplastic (cervical cancer)                               |
| 0,106 | 0,042 | Monocarboxylic acid transporter 1 inhibitor                    |
| 0,106 | 0,042 | Monocarboxylic acid transporter inhibitor                      |
| 0,083 | 0,020 | ATP diphosphatase inhibitor                                    |
| 0,146 | 0,083 | Plasmanylethanolamine desaturase inhibitor                     |
| 0,197 | 0,134 | Methane monooxygenase inhibitor                                |
| 0,147 | 0,084 | Tryptophan transaminase inhibitor                              |
| 0,128 | 0,066 | Antineoplastic (uterine cancer)                                |
| 0,070 | 0,007 | CYP4F8 substrate                                               |
| 0,144 | 0,081 | Glucosyl transferase inhibitor                                 |
| 0,077 | 0,014 | Sucrose-phosphate phosphatase inhibitor                        |
| 0,105 | 0,042 | Cysteine transaminase inhibitor                                |
| 0,198 | 0,135 | Sigma receptor agonist                                         |
| 0,139 | 0,077 | Antibacterial, ophthalmic                                      |
| 0,091 | 0,028 | CYP2A13 substrate                                              |
| 0,155 | 0,093 | Inorganic diphosphatase inhibitor                              |
| 0,139 | 0,077 | Chitin synthase inhibitor                                      |

|       |       |                                                            |
|-------|-------|------------------------------------------------------------|
| 0,094 | 0,032 | 3-Oxoacyl-[acyl-carrier-protein] synthase inhibitor        |
| 0,115 | 0,053 | Aspartate-ammonia ligase (ADP-forming) inhibitor           |
| 0,247 | 0,185 | Antiinflammatory, ophthalmic                               |
| 0,129 | 0,068 | Pantoate 4-dehydrogenase inhibitor                         |
| 0,152 | 0,091 | N-methyl-2-oxoglutaramate hydrolase inhibitor              |
| 0,140 | 0,079 | Adenylate kinase inhibitor                                 |
| 0,120 | 0,059 | L-galactonolactone oxidase inhibitor                       |
| 0,093 | 0,032 | Amylo-alpha-1,6-glucosidase inhibitor                      |
| 0,122 | 0,061 | D-lactate dehydrogenase (cytochrome) inhibitor             |
| 0,099 | 0,038 | (R)-aminopropanol dehydrogenase inhibitor                  |
| 0,150 | 0,090 | L-glucuronate reductase inhibitor                          |
| 0,130 | 0,070 | CYP4B1 substrate                                           |
| 0,088 | 0,028 | Peptidoglycan beta-N-acetylmuramidase inhibitor            |
| 0,185 | 0,126 | Tankyrase inhibitor                                        |
| 0,098 | 0,039 | Malate dehydrogenase (NADP+) inhibitor                     |
| 0,128 | 0,069 | Pyruvate dehydrogenase inhibitor                           |
| 0,090 | 0,031 | 4a-Hydroxytetrahydrobiopterin dehydratase inhibitor        |
| 0,109 | 0,050 | Leucine-tRNA ligase inhibitor                              |
| 0,149 | 0,090 | Polynucleotide 5'-hydroxy-kinase inhibitor                 |
| 0,140 | 0,081 | Peptidylamidoglycolate lyase inhibitor                     |
| 0,125 | 0,066 | Carnitine 3-dehydrogenase inhibitor                        |
| 0,148 | 0,089 | Cytochrome-b5 reductase substrate                          |
| 0,101 | 0,043 | Retinol O-fatty-acyltransferase inhibitor                  |
| 0,095 | 0,036 | Epoxide hydrolase substrate                                |
| 0,101 | 0,042 | Cellobiose phosphorylase inhibitor                         |
| 0,138 | 0,080 | Methylaspartate ammonia-lyase inhibitor                    |
| 0,111 | 0,052 | Adenylylsulphatase inhibitor                               |
| 0,081 | 0,022 | 1-Alkyl-2-acetyl glycerol O-acyltransferase inhibitor      |
| 0,223 | 0,165 | Antiviral (Influenza)                                      |
| 0,189 | 0,131 | Acetylserotonin O-methyltransferase inhibitor              |
| 0,086 | 0,029 | Aldose 1-epimerase inhibitor                               |
| 0,136 | 0,079 | HIV-2 reverse transcriptase inhibitor                      |
| 0,089 | 0,032 | Steroid sulfotransferase inhibitor                         |
| 0,118 | 0,060 | Ribonuclease inhibitor                                     |
| 0,118 | 0,061 | Aldehyde dehydrogenase [NAD(P)+] inhibitor                 |
| 0,187 | 0,130 | 1-Alkylglycerophosphocholine O-acetyltransferase inhibitor |
| 0,112 | 0,055 | Aspartate transaminase inhibitor                           |

|       |       |                                                                |
|-------|-------|----------------------------------------------------------------|
| 0,097 | 0,040 | Argininosuccinate lyase inhibitor                              |
| 0,147 | 0,090 | Benzoylformate decarboxylase inhibitor                         |
| 0,097 | 0,040 | Ribulose-bisphosphate carboxylase inhibitor                    |
| 0,187 | 0,130 | Antibacterial                                                  |
| 0,116 | 0,059 | Cholate-CoA ligase inhibitor                                   |
| 0,145 | 0,088 | Brachyurin inhibitor                                           |
| 0,115 | 0,059 | Pyrimidine-deoxynucleoside 2'-dioxygenase inhibitor            |
| 0,103 | 0,046 | UDP-N-acetylglucosamine diphosphorylase inhibitor              |
| 0,195 | 0,139 | X-methyl-His dipeptidase inhibitor                             |
| 0,193 | 0,137 | Acidifying agent non gastric                                   |
| 0,102 | 0,046 | 5-Oxoprolinase (ATP-hydrolysing) inhibitor                     |
| 0,155 | 0,099 | 3-Demethylubiquinone-9 3-O-methyltransferase inhibitor         |
| 0,119 | 0,063 | Diacylglycerol cholinephosphotransferase inhibitor             |
| 0,119 | 0,063 | NADH dehydrogenase inhibitor                                   |
| 0,146 | 0,090 | Acetate kinase inhibitor                                       |
| 0,130 | 0,075 | Ethanolaminephosphotransferase inhibitor                       |
| 0,078 | 0,023 | Mannosidase inhibitor                                          |
| 0,088 | 0,033 | Aspartate 1-decarboxylase inhibitor                            |
| 0,139 | 0,084 | Oligopeptidase B inhibitor                                     |
| 0,072 | 0,017 | Phosphatidylinositol 3-kinase alpha inhibitor                  |
| 0,096 | 0,042 | L-lysine oxidase inhibitor                                     |
| 0,071 | 0,017 | Biotin-[methylmalonyl-CoA-carboxytransferase] ligase inhibitor |
| 0,121 | 0,067 | Sulfate adenylyltransferase (ADP) inhibitor                    |
| 0,187 | 0,133 | Prostaglandin-E2 9-reductase inhibitor                         |
| 0,087 | 0,033 | Lactate-malate transhydrogenase inhibitor                      |
| 0,105 | 0,051 | Inositol-polyphosphate 5-phosphatase inhibitor                 |
| 0,169 | 0,116 | Aminomuconate-semialdehyde dehydrogenase inhibitor             |
| 0,198 | 0,145 | Chloride channel activator                                     |
| 0,107 | 0,053 | Dihydrouracil oxidase inhibitor                                |
| 0,086 | 0,033 | 3-Dehydroquinase synthase inhibitor                            |
| 0,115 | 0,062 | Alkanal monooxygenase (FMN-linked) inhibitor                   |
| 0,086 | 0,033 | mRNA (guanine-N7-)-methyltransferase inhibitor                 |
| 0,122 | 0,069 | Glycogen (starch) synthase inhibitor                           |
| 0,155 | 0,103 | Guanidinoacetate kinase inhibitor                              |
| 0,124 | 0,072 | Skin whitener                                                  |
| 0,070 | 0,017 | Prostaglandin-I synthase inhibitor                             |
| 0,267 | 0,215 | Intermittent claudication treatment                            |

|       |       |                                                                  |
|-------|-------|------------------------------------------------------------------|
| 0,073 | 0,021 | Glucan 1,4-alpha-glucosidase inhibitor                           |
| 0,190 | 0,138 | Glutaminy-peptide cyclotransferase inhibitor                     |
| 0,095 | 0,044 | Phenylalanine-tRNA ligase inhibitor                              |
| 0,106 | 0,055 | Acyloxyacyl hydrolase inhibitor                                  |
| 0,116 | 0,066 | Anabolic                                                         |
| 0,088 | 0,038 | Glutaminyl-tRNA synthase (glutamine-hydrolysing) inhibitor       |
| 0,085 | 0,035 | CYP2C2 substrate                                                 |
| 0,070 | 0,020 | Amylosucrase inhibitor                                           |
| 0,098 | 0,049 | Galactosylceramide sulfotransferase inhibitor                    |
| 0,116 | 0,067 | Cysteine desulfurase inhibitor                                   |
| 0,106 | 0,056 | tRNA (cytosine-5-)-methyltransferase inhibitor                   |
| 0,101 | 0,051 | Benzaldehyde dehydrogenase (NAD+) inhibitor                      |
| 0,143 | 0,094 | Hydroxymethylbilane synthase inhibitor                           |
| 0,199 | 0,150 | CYP2C6 substrate                                                 |
| 0,108 | 0,060 | Allantoicase inhibitor                                           |
| 0,119 | 0,070 | Beta lactamase inhibitor                                         |
| 0,112 | 0,064 | Glycerol-3-phosphate O-acyltransferase inhibitor                 |
| 0,091 | 0,043 | 2-Methylcitrate synthase inhibitor                               |
| 0,109 | 0,061 | DNA-3-methyladenine glycosylase II inhibitor                     |
| 0,124 | 0,076 | Aryl-alcohol dehydrogenase inhibitor                             |
| 0,098 | 0,050 | Deoxyribonuclease (pyrimidine dimer) inhibitor                   |
| 0,081 | 0,033 | Carnitine O-octanoyltransferase inhibitor                        |
| 0,127 | 0,079 | Sulfur dioxygenase inhibitor                                     |
| 0,077 | 0,029 | Beta galactosidase inhibitor                                     |
| 0,202 | 0,154 | NADPH-ferrihemoprotein reductase inhibitor                       |
| 0,058 | 0,010 | Sucrose phosphorylase inhibitor                                  |
| 0,102 | 0,054 | Mannonate dehydratase inhibitor                                  |
| 0,095 | 0,047 | Saccharopine dehydrogenase (NAD+, L-glutamate-forming) inhibitor |
| 0,070 | 0,022 | UGT2B4E substrate                                                |
| 0,070 | 0,022 | UGT2B30 substrate                                                |
| 0,070 | 0,022 | UGT2B19 substrate                                                |
| 0,070 | 0,022 | UGT2B23 substrate                                                |
| 0,070 | 0,022 | UGT2B4D substrate                                                |
| 0,114 | 0,067 | Aspartate kinase inhibitor                                       |
| 0,134 | 0,086 | (R,R)-butanediol dehydrogenase inhibitor                         |
| 0,192 | 0,145 | Antineoplastic (brain cancer)                                    |
| 0,208 | 0,160 | FMO1 substrate                                                   |

|       |       |                                                                                       |
|-------|-------|---------------------------------------------------------------------------------------|
| 0,126 | 0,078 | Protein-tyrosine sulfotransferase inhibitor                                           |
| 0,083 | 0,035 | Pyruvate, phosphate dikinase inhibitor                                                |
| 0,115 | 0,068 | 5 Hydroxytryptamine 4A antagonist                                                     |
| 0,078 | 0,032 | [acetyl-CoA carboxylase] kinase inhibitor                                             |
| 0,070 | 0,023 | Glucan 1,3-alpha-glucosidase inhibitor                                                |
| 0,136 | 0,089 | Glutamate synthase (ferredoxin) inhibitor                                             |
| 0,191 | 0,144 | Trimethylamine dehydrogenase inhibitor                                                |
| 0,072 | 0,025 | D-lactate-2-sulfatase inhibitor                                                       |
| 0,171 | 0,124 | Pitrilysin inhibitor                                                                  |
| 0,135 | 0,089 | N-Acyl-D-amino-acid deacylase inhibitor                                               |
| 0,185 | 0,139 | L-threonine 3-dehydrogenase inhibitor                                                 |
| 0,137 | 0,091 | 3,4-Dihydroxy-9,10-secoandrosta-1,3,5(10)-triene-9,17-dione 4,5-dioxygenase inhibitor |
| 0,084 | 0,038 | 4-Hydroxy-4-methyl-2-oxoglutarate aldolase inhibitor                                  |
| 0,064 | 0,018 | D(-)-tartrate dehydratase inhibitor                                                   |
| 0,086 | 0,041 | Glycerophosphocholine phosphodiesterase inhibitor                                     |
| 0,082 | 0,037 | 3(or 17)alpha-hydroxysteroid dehydrogenase inhibitor                                  |
| 0,080 | 0,035 | Lactaldehyde dehydrogenase inhibitor                                                  |
| 0,143 | 0,099 | Tyrosine kinase stimulant                                                             |
| 0,114 | 0,070 | CYP19 inhibitor                                                                       |
| 0,087 | 0,043 | Aspartate-semialdehyde dehydrogenase inhibitor                                        |
| 0,072 | 0,029 | Acidifying agent gastric                                                              |
| 0,127 | 0,084 | Cysteine synthase inhibitor                                                           |
| 0,071 | 0,028 | CYP24 inhibitor                                                                       |
| 0,136 | 0,093 | (S)-3-hydroxyacid ester dehydrogenase inhibitor                                       |
| 0,239 | 0,196 | CYP19A1 expression inhibitor                                                          |
| 0,129 | 0,086 | Candidapepsin inhibitor                                                               |
| 0,090 | 0,047 | 2-Oxoaldehyde dehydrogenase (NAD+) inhibitor                                          |
| 0,084 | 0,041 | ATP deaminase inhibitor                                                               |
| 0,092 | 0,049 | Scyllo-inosamine-4-phosphate amidinotransferase inhibitor                             |
| 0,205 | 0,162 | 3C-like protease (Human coronavirus) inhibitor                                        |
| 0,088 | 0,046 | Deoxycytidine kinase inhibitor                                                        |
| 0,110 | 0,068 | Glucose 1-dehydrogenase inhibitor                                                     |
| 0,085 | 0,043 | Polyamine biosynthesis inhibitor                                                      |
| 0,085 | 0,044 | Cyanate hydratase inhibitor                                                           |
| 0,067 | 0,025 | 3'(2'),5'-Bisphosphate nucleotidase inhibitor                                         |
| 0,066 | 0,025 | Aromatase inhibitor                                                                   |
| 0,151 | 0,110 | Cyclopentanone monooxygenase inhibitor                                                |

|       |       |                                                                  |
|-------|-------|------------------------------------------------------------------|
| 0,103 | 0,062 | Phosphatidate cytidyltransferase inhibitor                       |
| 0,124 | 0,083 | Endoglycosylceramidase inhibitor                                 |
| 0,093 | 0,053 | UDP-N-acetylglucosamine 2-epimerase inhibitor                    |
| 0,106 | 0,065 | Site-specific DNA-methyltransferase (adenine-specific) inhibitor |
| 0,068 | 0,028 | D-Serine ammonia-lyase inhibitor                                 |
| 0,055 | 0,015 | Tartrate decarboxylase inhibitor                                 |
| 0,253 | 0,213 | Oxidoreductase inhibitor                                         |
| 0,086 | 0,046 | Alpha,alpha-trehalose-phosphate synthase (UDP-forming) inhibitor |
| 0,101 | 0,062 | Ribitol 2-dehydrogenase inhibitor                                |
| 0,105 | 0,067 | Adenosylmethionine-8-amino-7-oxononanoate transaminase inhibitor |
| 0,044 | 0,005 | Progesterone receptor B antagonist                               |
| 0,098 | 0,059 | Thiamine-phosphate diphosphorylase inhibitor                     |
| 0,097 | 0,058 | Glycerol dehydratase inhibitor                                   |
| 0,156 | 0,117 | Thermitase inhibitor                                             |
| 0,090 | 0,051 | CYP26 substrate                                                  |
| 0,094 | 0,056 | Acetoacetate decarboxylase inhibitor                             |
| 0,099 | 0,061 | Cytosole dipeptidase inhibitor                                   |
| 0,071 | 0,033 | Corticotropin releasing factor antagonist                        |
| 0,208 | 0,170 | Antiprotozoal (Coccidial)                                        |
| 0,175 | 0,137 | Antiprotozoal                                                    |
| 0,128 | 0,090 | Tryptophanyl aminopeptidase inhibitor                            |
| 0,142 | 0,104 | 4-Chlorophenylacetate 3,4-dioxygenase inhibitor                  |
| 0,168 | 0,130 | Diamine N-acetyltransferase inhibitor                            |
| 0,126 | 0,088 | 3-Hydroxyphenylacetate 6-hydroxylase inhibitor                   |
| 0,135 | 0,097 | Pyruvate carboxylase inhibitor                                   |
| 0,122 | 0,084 | Acylglycerone-phosphate reductase inhibitor                      |
| 0,061 | 0,023 | CYP17 substrate                                                  |
| 0,061 | 0,024 | Na <sup>+</sup> K <sup>+</sup> transporting ATPase inhibitor     |
| 0,134 | 0,097 | 4-Hydroxybenzoate nonaprenyltransferase inhibitor                |
| 0,174 | 0,137 | O-aminophenol oxidase inhibitor                                  |
| 0,089 | 0,053 | Necroptosis inhibitor                                            |
| 0,121 | 0,084 | Gingipain R inhibitor                                            |
| 0,074 | 0,037 | Glutathione reductase stimulant                                  |
| 0,074 | 0,037 | Glutathione reductase (NADPH) stimulant                          |
| 0,121 | 0,084 | Galactoside O-acetyltransferase inhibitor                        |
| 0,119 | 0,084 | Arylalkyl acylamidase inhibitor                                  |
| 0,107 | 0,071 | Aspartyl aminopeptidase inhibitor                                |

|       |       |                                                                                             |
|-------|-------|---------------------------------------------------------------------------------------------|
| 0,150 | 0,114 | Ferredoxin-nitrite reductase inhibitor                                                      |
| 0,103 | 0,068 | Alanine transaminase inhibitor                                                              |
| 0,103 | 0,068 | Malyl-CoA lyase inhibitor                                                                   |
| 0,100 | 0,065 | Glycerol-3-phosphate dehydrogenase (NAD+) inhibitor                                         |
| 0,101 | 0,065 | Glycoprotein-fucosylgalactoside alpha-N-acetylgalactosaminyltransferase inhibitor           |
| 0,065 | 0,030 | Hydroxylysine kinase inhibitor                                                              |
| 0,096 | 0,062 | Alpha, alpha-trehalase inhibitor                                                            |
| 0,081 | 0,046 | Phosphoribulokinase inhibitor                                                               |
| 0,257 | 0,223 | Mannotetraose 2-alpha-N-acetylglucosaminyltransferase inhibitor                             |
| 0,105 | 0,070 | Squalene epoxidase inhibitor                                                                |
| 0,133 | 0,098 | Heat shock protein agonist                                                                  |
| 0,061 | 0,027 | Propionate CoA-transferase inhibitor                                                        |
| 0,073 | 0,039 | Dextranucrase inhibitor                                                                     |
| 0,197 | 0,163 | DNA synthesis inhibitor                                                                     |
| 0,073 | 0,039 | Deoxyhypusine synthase inhibitor                                                            |
| 0,070 | 0,036 | Malate synthase inhibitor                                                                   |
| 0,079 | 0,045 | 3-Dehydroquinate dehydratase inhibitor                                                      |
| 0,112 | 0,078 | Narcotic antagonist                                                                         |
| 0,231 | 0,198 | Polarisation stimulant                                                                      |
| 0,077 | 0,044 | N-acetylglucosaminyldiphosphoundecaprenol N-acetyl-beta-D-mannosaminyltransferase inhibitor |
| 0,087 | 0,054 | Guanidinopropionase inhibitor                                                               |
| 0,166 | 0,133 | Severe acute respiratory syndrome treatment                                                 |
| 0,047 | 0,014 | Thymidine phosphorylase inhibitor                                                           |
| 0,078 | 0,045 | Dihydrolipoamide S-acetyltransferase inhibitor                                              |
| 0,063 | 0,031 | CMP-KDO synthase inhibitor                                                                  |
| 0,077 | 0,044 | Hydroperoxide dehydratase inhibitor                                                         |
| 0,096 | 0,064 | Isocitrate dehydrogenase (NAD+) inhibitor                                                   |
| 0,035 | 0,003 | 3-Oxoacyl-[acyl-carrier-protein] synthase II inhibitor                                      |
| 0,251 | 0,219 | Insulin promoter                                                                            |
| 0,062 | 0,030 | Biotin-[propionyl-CoA-carboxylase (ATP-hydrolysing)] ligase inhibitor                       |
| 0,097 | 0,065 | Malate dehydrogenase (oxaloacetate-decarboxylating) inhibitor                               |
| 0,154 | 0,123 | Nicotinic alpha4beta2 receptor antagonist                                                   |
| 0,099 | 0,067 | Tyrosine-protein kinase TYRO 10 inhibitor                                                   |
| 0,098 | 0,066 | Glutamate (mGluR6) antagonist                                                               |
| 0,210 | 0,178 | Pyroglutamyl-peptidase II inhibitor                                                         |
| 0,081 | 0,050 | S-methyl-5-thioribose kinase inhibitor                                                      |
| 0,213 | 0,182 | Membrane integrity antagonist                                                               |

|       |       |                                                                                  |
|-------|-------|----------------------------------------------------------------------------------|
| 0,074 | 0,042 | Glycerol kinase inhibitor                                                        |
| 0,125 | 0,094 | Procollagen C-endopeptidase inhibitor                                            |
| 0,116 | 0,085 | Cathepsin H inhibitor                                                            |
| 0,102 | 0,071 | Cerevisin inhibitor                                                              |
| 0,133 | 0,103 | Tryptophan alpha,beta-oxidase inhibitor                                          |
| 0,062 | 0,031 | Glycine N-choloyltransferase inhibitor                                           |
| 0,107 | 0,077 | CYP3C substrate                                                                  |
| 0,075 | 0,044 | L-aminoadipate-semialdehyde dehydrogenase inhibitor                              |
| 0,109 | 0,079 | Glucosamine-6-phosphate deaminase inhibitor                                      |
| 0,105 | 0,074 | Decylcitrate synthase inhibitor                                                  |
| 0,065 | 0,035 | Alpha-1,6-mannosyl-glycoprotein 2-beta-N-acetylglucosaminyltransferase inhibitor |
| 0,063 | 0,033 | Deoxyadenosine kinase inhibitor                                                  |
| 0,079 | 0,050 | N-acetylglucosamine-6-phosphate deacetylase inhibitor                            |
| 0,100 | 0,070 | D-Ornithine 4,5-aminomutase inhibitor                                            |
| 0,128 | 0,099 | Lombricine kinase inhibitor                                                      |
| 0,101 | 0,071 | Diiodophenylpyruvate reductase inhibitor                                         |
| 0,136 | 0,107 | Tryptophan dimethylallyltransferase inhibitor                                    |
| 0,050 | 0,021 | Methylaspartate mutase inhibitor                                                 |
| 0,072 | 0,043 | UGT2B7H substrate                                                                |
| 0,072 | 0,043 | UGT2B7Y substrate                                                                |
| 0,155 | 0,126 | Sodium channel blocker class Ib                                                  |
| 0,190 | 0,161 | Monoamine uptake inhibitor                                                       |
| 0,191 | 0,162 | 4-Hydroxyphenylacetate 3-monooxygenase inhibitor                                 |
| 0,082 | 0,054 | Neolactotetraosylceramide alpha-2,3-sialyltransferase inhibitor                  |
| 0,127 | 0,098 | Peptide-tryptophan 2,3-dioxygenase inhibitor                                     |
| 0,114 | 0,086 | 3-Isopropylmalate dehydratase inhibitor                                          |
| 0,073 | 0,045 | Glutamate (mGluR8) agonist                                                       |
| 0,042 | 0,014 | Homoisocitrate dehydrogenase inhibitor                                           |
| 0,082 | 0,054 | Oligo-1,6-glucosidase inhibitor                                                  |
| 0,089 | 0,061 | CTP synthase inhibitor                                                           |
| 0,103 | 0,075 | D-cysteine desulfhydrase inhibitor                                               |
| 0,060 | 0,032 | Sucrose alpha-glucosidase inhibitor                                              |
| 0,091 | 0,062 | Astringent                                                                       |
| 0,049 | 0,021 | Orotidylate decarboxylase inhibitor                                              |
| 0,103 | 0,075 | Glucosamine-1-phosphate N-acetyltransferase inhibitor                            |
| 0,074 | 0,047 | Serine-tRNA ligase inhibitor                                                     |
| 0,161 | 0,134 | Corticosteroid side-chain-isomerase inhibitor                                    |

|       |       |                                                                |
|-------|-------|----------------------------------------------------------------|
| 0,088 | 0,060 | D-malate dehydrogenase (decarboxylating) inhibitor             |
| 0,066 | 0,039 | Quinate 5-dehydrogenase inhibitor                              |
| 0,070 | 0,043 | 3-Hydroxydecanoyl-[acyl-carrier-protein] dehydratase inhibitor |
| 0,058 | 0,031 | CYP24 substrate                                                |
| 0,067 | 0,040 | GMP synthase inhibitor                                         |
| 0,082 | 0,056 | Succinate-hydroxymethylglutarate CoA-transferase inhibitor     |
| 0,118 | 0,092 | Homogentisate 1,2-dioxygenase inhibitor                        |
| 0,040 | 0,014 | Transaldolase inhibitor                                        |
| 0,070 | 0,043 | Formimidoylglutamase inhibitor                                 |
| 0,132 | 0,105 | Restless leg syndrome treatment                                |
| 0,066 | 0,039 | Thioether S-methyltransferase inhibitor                        |
| 0,168 | 0,142 | N-methylhydantoinase (ATP-hydrolysing) inhibitor               |
| 0,109 | 0,083 | Phenylacetaldehyde dehydrogenase inhibitor                     |
| 0,066 | 0,040 | Phosphoglucomutase inhibitor                                   |
| 0,112 | 0,086 | Acylphosphatase inhibitor                                      |
| 0,119 | 0,093 | Succinic dehydrogenase inhibitor                               |
| 0,065 | 0,039 | Oxaloacetate tautomerase inhibitor                             |
| 0,093 | 0,067 | Formaldehyde dehydrogenase inhibitor                           |
| 0,053 | 0,027 | CYP3A11 substrate                                              |
| 0,058 | 0,033 | Uracil phosphoribosyltransferase inhibitor                     |
| 0,048 | 0,022 | Androst-4-ene-3,17-dione monooxygenase inhibitor               |
| 0,140 | 0,114 | Choline kinase inhibitor                                       |
| 0,071 | 0,046 | Isocitrate dehydrogenase (NADP+) inhibitor                     |
| 0,075 | 0,050 | Maleate hydratase inhibitor                                    |
| 0,098 | 0,073 | Sarcosine oxidase inhibitor                                    |
| 0,039 | 0,013 | Uridine phosphorylase inhibitor                                |
| 0,046 | 0,021 | Isopentenyl-diphosphate DELTA-isomerase inhibitor              |
| 0,103 | 0,078 | Asparaginase inhibitor                                         |
| 0,050 | 0,025 | NADPH oxidoreductase inhibitor                                 |
| 0,075 | 0,050 | ACK1 kinase inhibitor                                          |
| 0,084 | 0,059 | CMP-N-acylneuraminate phosphodiesterase inhibitor              |
| 0,099 | 0,075 | Aspartate racemase inhibitor                                   |
| 0,123 | 0,099 | Narcolepsy treatment                                           |
| 0,081 | 0,057 | Muconate cycloisomerase inhibitor                              |
| 0,097 | 0,074 | 2-Nitrophenol 2-monooxygenase inhibitor                        |
| 0,077 | 0,054 | D-alanine transaminase inhibitor                               |
| 0,104 | 0,081 | Acetolactate decarboxylase inhibitor                           |

|       |       |                                                                                  |
|-------|-------|----------------------------------------------------------------------------------|
| 0,083 | 0,061 | Diguanidinobutanase inhibitor                                                    |
| 0,090 | 0,068 | Vascular endothelial growth factor antagonist                                    |
| 0,057 | 0,035 | Aspartate ammonia-lyase inhibitor                                                |
| 0,102 | 0,080 | Dethiobiotin synthase inhibitor                                                  |
| 0,115 | 0,092 | FMN reductase inhibitor                                                          |
| 0,068 | 0,046 | L-lactate dehydrogenase (cytochrome) inhibitor                                   |
| 0,067 | 0,044 | UDP-glucose 6-dehydrogenase inhibitor                                            |
| 0,070 | 0,047 | Nicotinic receptor alpha7 subunit antagonist                                     |
| 0,088 | 0,066 | CYP2B4 substrate                                                                 |
| 0,080 | 0,058 | tRNA (guanine-N2-)-methyltransferase inhibitor                                   |
| 0,103 | 0,081 | Pyruvate dehydrogenase (lipoamide) inhibitor                                     |
| 0,101 | 0,080 | Serine-phosphoethanolamine synthase inhibitor                                    |
| 0,079 | 0,058 | SULT2A1 substrate                                                                |
| 0,152 | 0,131 | Expectorant                                                                      |
| 0,089 | 0,069 | Orotate reductase (NADPH) inhibitor                                              |
| 0,185 | 0,165 | Monodehydroascorbate reductase (NADH) inhibitor                                  |
| 0,109 | 0,089 | Thiol S-methyltransferase inhibitor                                              |
| 0,043 | 0,022 | Dichloromethane dehalogenase inhibitor                                           |
| 0,171 | 0,150 | TRPA1 agonist                                                                    |
| 0,128 | 0,108 | Glycerol dehydrogenase (NADP+) inhibitor                                         |
| 0,191 | 0,171 | Immunomodulator                                                                  |
| 0,151 | 0,131 | Gastrointestinal motility stimulant                                              |
| 0,086 | 0,067 | Capillary fragility treatment                                                    |
| 0,143 | 0,124 | Laxative                                                                         |
| 0,053 | 0,033 | AMP nucleosidase inhibitor                                                       |
| 0,079 | 0,059 | Cystathionine beta-lyase inhibitor                                               |
| 0,152 | 0,133 | Histone acetyltransferase inhibitor                                              |
| 0,049 | 0,029 | N-acetylglucosaminylidiphosphodolichol N-acetylglucosaminyltransferase inhibitor |
| 0,135 | 0,115 | Arylamine N-acetyltransferase inhibitor                                          |
| 0,074 | 0,055 | Alpha glucosidase inhibitor                                                      |
| 0,096 | 0,077 | Aryl-aldehyde dehydrogenase (NADP+) inhibitor                                    |
| 0,039 | 0,020 | Membrane-oligosaccharide glycerophosphotransferase inhibitor                     |
| 0,252 | 0,234 | Mucositis treatment                                                              |
| 0,084 | 0,066 | Diaminopropionate ammonia-lyase inhibitor                                        |
| 0,131 | 0,113 | Quisqualate antagonist                                                           |
| 0,159 | 0,141 | Renal tissue kallikrein inhibitor                                                |
| 0,041 | 0,023 | Phosphoglycerate phosphatase inhibitor                                           |

|       |       |                                                                                 |
|-------|-------|---------------------------------------------------------------------------------|
| 0,077 | 0,059 | [myelin basic protein]-arginine N-methyltransferase inhibitor                   |
| 0,063 | 0,045 | Beta-1,4-mannosyl-glycoprotein 4-beta-N-acetylglucosaminyltransferase inhibitor |
| 0,058 | 0,040 | Plus-end-directed kinesin ATPase inhibitor                                      |
| 0,050 | 0,033 | Anhydrotetracycline monooxygenase inhibitor                                     |
| 0,183 | 0,166 | Calcium channel activator                                                       |
| 0,045 | 0,028 | Thymidine-triphosphatase inhibitor                                              |
| 0,057 | 0,040 | Carbamoyl-serine ammonia-lyase inhibitor                                        |
| 0,092 | 0,075 | Ornithine-oxo-acid transaminase inhibitor                                       |
| 0,158 | 0,142 | Ribonucleoside triphosphate reductase inhibitor                                 |
| 0,073 | 0,056 | Urocanate hydratase inhibitor                                                   |
| 0,025 | 0,008 | Progesterone receptor B1 antagonist                                             |
| 0,062 | 0,046 | UDP-N-acetylmuramoylalanine-D-glutamate ligase inhibitor                        |
| 0,097 | 0,081 | Adenine deaminase inhibitor                                                     |
| 0,122 | 0,106 | Corticosteroid antagonist                                                       |
| 0,076 | 0,060 | Cushing's syndrome treatment                                                    |
| 0,072 | 0,056 | Carbamoyl-phosphate synthase (ammonia) inhibitor                                |
| 0,070 | 0,054 | Propanediol dehydratase inhibitor                                               |
| 0,119 | 0,103 | Guanidinoacetate N-methyltransferase inhibitor                                  |
| 0,091 | 0,075 | CMP-N-acetylneuraminate monooxygenase inhibitor                                 |
| 0,077 | 0,062 | Guanylate kinase inhibitor                                                      |
| 0,112 | 0,097 | Cancer procoagulant inhibitor                                                   |
| 0,104 | 0,089 | Malate-CoA ligase inhibitor                                                     |
| 0,060 | 0,045 | Methylthioadenosine nucleosidase inhibitor                                      |
| 0,037 | 0,022 | Glucose-6-phosphate isomerase inhibitor                                         |
| 0,104 | 0,090 | Lysine 2-monooxygenase inhibitor                                                |
| 0,088 | 0,073 | Triose-phosphate isomerase inhibitor                                            |
| 0,178 | 0,163 | Antiparkinsonian, rigidity relieving                                            |
| 0,169 | 0,155 | Dactylisin inhibitor                                                            |
| 0,081 | 0,067 | UDP-N-acetylglucosamine 1-carboxyvinyltransferase inhibitor                     |
| 0,178 | 0,164 | Antitoxic                                                                       |
| 0,156 | 0,141 | D-amino-acid dehydrogenase inhibitor                                            |
| 0,053 | 0,039 | Glutamate (mGluR1) agonist                                                      |
| 0,030 | 0,016 | Alpha glucosidase I inhibitor                                                   |
| 0,126 | 0,112 | Tryptophanamidase inhibitor                                                     |
| 0,038 | 0,024 | Endo-beta-N-acetylglucosaminidase inhibitor                                     |
| 0,064 | 0,051 | 4-Hydroxy-2-oxoglutarate aldolase inhibitor                                     |
| 0,058 | 0,045 | Androgen antagonist                                                             |

|       |       |                                                                |
|-------|-------|----------------------------------------------------------------|
| 0,103 | 0,089 | Cysteine-S-conjugate beta-lyase inhibitor                      |
| 0,114 | 0,101 | Isoquinoline 1-oxidoreductase inhibitor                        |
| 0,080 | 0,066 | Haloalkane dehalogenase inhibitor                              |
| 0,128 | 0,115 | Acetylspermidine deacetylase inhibitor                         |
| 0,076 | 0,064 | Carboxylate reductase inhibitor                                |
| 0,100 | 0,087 | Arginine deiminase inhibitor                                   |
| 0,059 | 0,047 | Asparagine-oxo-acid transaminase inhibitor                     |
| 0,224 | 0,212 | Cancer associated disorders treatment                          |
| 0,043 | 0,031 | 2-Ethylmalate synthase inhibitor                               |
| 0,030 | 0,018 | Phosphopyruvate hydratase inhibitor                            |
| 0,094 | 0,082 | Sulfate adenylyltransferase inhibitor                          |
| 0,066 | 0,054 | Cellulose synthase (UDP-forming) inhibitor                     |
| 0,096 | 0,084 | Photinus-luciferin 4-monooxygenase (ATP-hydrolysing) inhibitor |
| 0,086 | 0,074 | Agaritine gamma-glutamyltransferase inhibitor                  |
| 0,078 | 0,067 | Threonine ammonia-lyase inhibitor                              |
| 0,092 | 0,081 | Putrescine oxidase inhibitor                                   |
| 0,075 | 0,064 | Gastricsin inhibitor                                           |
| 0,094 | 0,083 | Xanthommatin reductase inhibitor                               |
| 0,087 | 0,076 | Streptopain inhibitor                                          |
| 0,048 | 0,037 | Nucleoside deoxyribosyltransferase inhibitor                   |
| 0,080 | 0,069 | Nucleotide diphosphatase inhibitor                             |
| 0,195 | 0,184 | Aldehyde oxidase inhibitor                                     |
| 0,116 | 0,105 | Dolichyl-phosphate beta-D-mannosyltransferase inhibitor        |
| 0,024 | 0,013 | Dopamine D2B antagonist                                        |
| 0,054 | 0,044 | Malate dehydrogenase (decarboxylating) inhibitor               |
| 0,100 | 0,090 | Venombin A inhibitor                                           |
| 0,055 | 0,045 | 1-Phosphofructokinase inhibitor                                |
| 0,053 | 0,043 | Assemblin inhibitor                                            |
| 0,117 | 0,107 | Phenylalanine racemase (ATP-hydrolysing) inhibitor             |
| 0,110 | 0,100 | Polyamine oxidase inhibitor                                    |
| 0,052 | 0,043 | Protein N-acetylglucosaminyltransferase inhibitor              |
| 0,051 | 0,042 | Aldehyde dehydrogenase 1A2 inhibitor                           |
| 0,127 | 0,118 | UGT2B7 substrate                                               |
| 0,106 | 0,096 | Prolactin inhibitor                                            |
| 0,018 | 0,009 | Antiprotozoal activity enhancer                                |
| 0,098 | 0,089 | Coagulant                                                      |
| 0,074 | 0,065 | Isocitrate lyase inhibitor                                     |

|       |       |                                                                   |
|-------|-------|-------------------------------------------------------------------|
| 0,075 | 0,066 | [acyl-carrier-protein] S-malonyltransferase inhibitor             |
| 0,116 | 0,107 | Quinoline-4-carboxylate 2-oxidoreductase inhibitor                |
| 0,090 | 0,081 | Antineoplastic (squamous cell carcinoma)                          |
| 0,056 | 0,047 | Altronate dehydratase inhibitor                                   |
| 0,048 | 0,040 | Tubulin GTPase inhibitor                                          |
| 0,043 | 0,035 | Glucose-1-phosphate adenylyltransferase inhibitor                 |
| 0,016 | 0,008 | Kanamycin kinase inhibitor                                        |
| 0,049 | 0,041 | D-Alanine-poly(phosphoribitol) ligase inhibitor                   |
| 0,042 | 0,034 | Fructose 5-dehydrogenase (NADP+) inhibitor                        |
| 0,026 | 0,018 | Tartrate dehydrogenase inhibitor                                  |
| 0,084 | 0,076 | Neuropeptide FF2 agonist                                          |
| 0,084 | 0,076 | Neuropeptide FF agonist                                           |
| 0,095 | 0,087 | Pyridoxine 5-dehydrogenase inhibitor                              |
| 0,039 | 0,032 | Glucose-1-phosphatase inhibitor                                   |
| 0,108 | 0,101 | Saccharopine dehydrogenase (NADP+, L-glutamate-forming) inhibitor |
| 0,022 | 0,015 | Cortisone alpha-reductase inhibitor                               |
| 0,090 | 0,083 | Glutamine-tRNA ligase inhibitor                                   |
| 0,142 | 0,135 | Antinaupathic                                                     |
| 0,070 | 0,063 | 4-Pyridoxolactonase inhibitor                                     |
| 0,207 | 0,200 | Nicotinate dehydrogenase inhibitor                                |
| 0,149 | 0,142 | Beta-carotene 15,15'-monooxygenase inhibitor                      |
| 0,068 | 0,061 | 1-Pyrroline-5-carboxylate dehydrogenase inhibitor                 |
| 0,050 | 0,043 | Chalcone isomerase inhibitor                                      |
| 0,135 | 0,128 | Atrolysin A inhibitor                                             |
| 0,037 | 0,030 | Kainate receptor agonist                                          |
| 0,069 | 0,063 | Thiosulfate sulfurtransferase inhibitor                           |
| 0,081 | 0,074 | Glycine transaminase inhibitor                                    |
| 0,050 | 0,044 | Pyruvate, water dikinase inhibitor                                |
| 0,114 | 0,108 | UGT2B15 substrate                                                 |
| 0,069 | 0,063 | Serine-glyoxylate transaminase inhibitor                          |
| 0,119 | 0,113 | N-Carbamoyl-D-amino acid hydrolase inhibitor                      |
| 0,109 | 0,103 | Protein-glutamate methylesterase inhibitor                        |
| 0,012 | 0,006 | Prostaglandin EP12 antagonist                                     |
| 0,080 | 0,075 | Glycine hydroxymethyltransferase inhibitor                        |
| 0,036 | 0,030 | Glucosylceramidase inhibitor                                      |
| 0,038 | 0,033 | Strombine dehydrogenase inhibitor                                 |
| 0,067 | 0,062 | Aminolevulinate transaminase inhibitor                            |

|       |       |                                                            |
|-------|-------|------------------------------------------------------------|
| 0,038 | 0,033 | Sodium-dependent vitamin C transporter 2 inhibitor         |
| 0,088 | 0,083 | Phosphoglycerate mutase inhibitor                          |
| 0,043 | 0,038 | Polyphosphate kinase inhibitor                             |
| 0,129 | 0,125 | Glucuronate isomerase inhibitor                            |
| 0,087 | 0,083 | Chloramphenicol O-acetyltransferase inhibitor              |
| 0,033 | 0,029 | Ribose-5-phosphate adenylyltransferase inhibitor           |
| 0,054 | 0,050 | Urate transporter 1 inhibitor                              |
| 0,042 | 0,038 | Carboxy-cis,cis-muconate cyclase inhibitor                 |
| 0,065 | 0,061 | Phosphoglycolate phosphatase inhibitor                     |
| 0,058 | 0,054 | Dihydrodipicolinate synthase inhibitor                     |
| 0,073 | 0,069 | Carboxypeptidase M inhibitor                               |
| 0,033 | 0,029 | RNA agonist                                                |
| 0,024 | 0,020 | Dolichyldiphosphatase inhibitor                            |
| 0,182 | 0,178 | Choline-phosphate cytidylyltransferase inhibitor           |
| 0,043 | 0,040 | Bis(5'-nucleosyl)-tetraphosphatase (symmetrical) inhibitor |
| 0,032 | 0,029 | Diphosphate-serine phosphotransferase inhibitor            |
| 0,037 | 0,034 | Adenylate cyclase I inhibitor                              |
| 0,024 | 0,021 | Cathepsin S inhibitor                                      |
| 0,045 | 0,041 | Glutamate uptake inhibitor                                 |
| 0,053 | 0,050 | Aryl hydrocarbon receptor antagonist                       |
| 0,102 | 0,100 | Heat shock protein 70 agonist                              |
| 0,016 | 0,013 | CYP11B1 substrate                                          |
| 0,034 | 0,032 | Phosphoserine transaminase inhibitor                       |
| 0,096 | 0,094 | Reductase inhibitor                                        |
| 0,111 | 0,109 | Diphosphomevalonate decarboxylase inhibitor                |
| 0,036 | 0,034 | [Isocitrate dehydrogenase (NADP+)] kinase inhibitor        |
| 0,074 | 0,072 | Alcohol oxidase inhibitor                                  |
| 0,123 | 0,121 | Phosphatidate phosphatase inhibitor                        |
| 0,098 | 0,096 | Deoxycytidylate 5-hydroxymethyltransferase inhibitor       |
| 0,058 | 0,056 | Citrate (Si)-synthase inhibitor                            |
| 0,143 | 0,142 | Histidinol-phosphatase inhibitor                           |
| 0,222 | 0,220 | CYP3A5 substrate                                           |
| 0,027 | 0,025 | Glutamate (mGluR5a) agonist                                |
| 0,027 | 0,025 | Glutamate (mGluR1a) agonist                                |
| 0,058 | 0,057 | Fumarylacetoacetase inhibitor                              |
| 0,161 | 0,160 | Hydroxylamine reductase inhibitor                          |
| 0,088 | 0,087 | Lysyl endopeptidase inhibitor                              |

|       |       |                                                |
|-------|-------|------------------------------------------------|
| 0,093 | 0,093 | Estrone sulfotransferase inhibitor             |
| 0,123 | 0,122 | MDM2 inhibitor                                 |
| 0,058 | 0,058 | NMN nucleosidase inhibitor                     |
| 0,044 | 0,044 | Mannosyl-oligosaccharide glucosidase inhibitor |
| 0,140 | 0,140 | UGT1A1 substrate                               |

### Complex 3 All

☒ All
 ☐ Pa>Pi
 ☐ Pa>0,3
 ☐ Pa>0,7

| Pa    | Pi    | Activity                                              |
|-------|-------|-------------------------------------------------------|
| 0,850 | 0,001 | Prostaglandin E1 antagonist                           |
| 0,836 | 0,004 | Ophthalmic drug                                       |
| 0,824 | 0,003 | Antiglaucomic                                         |
| 0,831 | 0,023 | Phobic disorders treatment                            |
| 0,799 | 0,011 | Nicotinic alpha6beta3beta4alpha5 receptor antagonist  |
| 0,767 | 0,002 | Gestagen antagonist                                   |
| 0,760 | 0,013 | 5-O-(4-coumaroyl)-D-quinic 3'-monooxygenase inhibitor |
| 0,778 | 0,031 | Testosterone 17beta-dehydrogenase (NADP+) inhibitor   |
| 0,760 | 0,016 | Nicotinic alpha2beta2 receptor antagonist             |
| 0,760 | 0,029 | Acrocyllindropepsin inhibitor                         |
| 0,760 | 0,029 | Saccharopepsin inhibitor                              |
| 0,760 | 0,029 | Chymosin inhibitor                                    |
| 0,720 | 0,008 | Glucan 1,4-alpha-maltotriohydrolase inhibitor         |
| 0,671 | 0,005 | Antineoplastic (non-Hodgkin's lymphoma)               |
| 0,696 | 0,034 | Sugar-phosphatase inhibitor                           |
| 0,683 | 0,022 | Alkylacetyl glycerophosphatase inhibitor              |
| 0,689 | 0,028 | Acylcarnitine hydrolase inhibitor                     |
| 0,665 | 0,008 | Insulin promoter                                      |
| 0,702 | 0,050 | CYP2J substrate                                       |
| 0,642 | 0,005 | Imidazoline receptor agonist                          |
| 0,677 | 0,045 | Polyporopepsin inhibitor                              |
| 0,696 | 0,070 | Ubiquinol-cytochrome-c reductase inhibitor            |
| 0,657 | 0,037 | Glutamyl endopeptidase II inhibitor                   |
| 0,646 | 0,030 | Ribulose-phosphate 3-epimerase inhibitor              |

|       |       |                                                                      |
|-------|-------|----------------------------------------------------------------------|
| 0,683 | 0,069 | Aspulvinone dimethylallyltransferase inhibitor                       |
| 0,649 | 0,047 | CYP2J2 substrate                                                     |
| 0,635 | 0,039 | NADPH peroxidase inhibitor                                           |
| 0,618 | 0,024 | Cytoprotectant                                                       |
| 0,616 | 0,023 | 27-Hydroxycholesterol 7alpha-monooxygenase inhibitor                 |
| 0,624 | 0,033 | Complement factor D inhibitor                                        |
| 0,595 | 0,004 | Pediculicide                                                         |
| 0,592 | 0,011 | Dolichyl-diphosphooligosaccharide-protein glycotransferase inhibitor |
| 0,579 | 0,005 | Antineoplastic (ovarian cancer)                                      |
| 0,584 | 0,029 | Chloride peroxidase inhibitor                                        |
| 0,595 | 0,046 | Alkenylglycerophosphocholine hydrolase inhibitor                     |
| 0,596 | 0,051 | TP53 expression enhancer                                             |
| 0,550 | 0,005 | CYP2B11 substrate                                                    |
| 0,560 | 0,019 | Mannan endo-1,4-beta-mannosidase inhibitor                           |
| 0,572 | 0,033 | Gastrin inhibitor                                                    |
| 0,563 | 0,027 | L-glutamate oxidase inhibitor                                        |
| 0,596 | 0,066 | Glycosylphosphatidylinositol phospholipase D inhibitor               |
| 0,550 | 0,020 | CYP2A4 substrate                                                     |
| 0,574 | 0,061 | Phosphatase inhibitor                                                |
| 0,513 | 0,009 | Imidazoline I1 receptor agonist                                      |
| 0,546 | 0,046 | Platelet aggregation stimulant                                       |
| 0,537 | 0,044 | JAK2 expression inhibitor                                            |
| 0,549 | 0,060 | Omptin inhibitor                                                     |
| 0,518 | 0,033 | Antipruritic, allergic                                               |
| 0,530 | 0,048 | UDP-N-acetylglucosamine 4-epimerase inhibitor                        |
| 0,528 | 0,047 | Glucan endo-1,6-beta-glucosidase inhibitor                           |
| 0,536 | 0,056 | Lysase inhibitor                                                     |
| 0,522 | 0,043 | Pterin deaminase inhibitor                                           |
| 0,531 | 0,052 | Macrophage colony stimulating factor agonist                         |
| 0,502 | 0,027 | Glyoxylate reductase inhibitor                                       |
| 0,493 | 0,019 | Albendazole monooxygenase inhibitor                                  |
| 0,521 | 0,049 | Glucan endo-1,3-beta-D-glucosidase inhibitor                         |
| 0,521 | 0,049 | Venombin AB inhibitor                                                |
| 0,498 | 0,031 | Pullulanase inhibitor                                                |
| 0,489 | 0,022 | Cutinase inhibitor                                                   |
| 0,484 | 0,018 | Dementia treatment                                                   |
| 0,474 | 0,009 | Acaricide                                                            |

|       |       |                                                            |
|-------|-------|------------------------------------------------------------|
| 0,523 | 0,058 | Antidyskinetic                                             |
| 0,498 | 0,033 | CYP2B5 substrate                                           |
| 0,510 | 0,052 | Limulus clotting factor B inhibitor                        |
| 0,491 | 0,038 | 3-Hydroxybenzoate 6-monooxygenase inhibitor                |
| 0,492 | 0,039 | Respiratory analeptic                                      |
| 0,505 | 0,058 | Carboxypeptidase Taq inhibitor                             |
| 0,475 | 0,028 | Peptidoglycan glycosyltransferase inhibitor                |
| 0,508 | 0,061 | Electron-transferring-flavoprotein dehydrogenase inhibitor |
| 0,494 | 0,047 | Feruloyl esterase inhibitor                                |
| 0,479 | 0,033 | IgA-specific serine endopeptidase inhibitor                |
| 0,522 | 0,079 | Pseudolysin inhibitor                                      |
| 0,476 | 0,034 | All-trans-retinyl-palmitate hydrolase inhibitor            |
| 0,455 | 0,013 | RNA directed DNA polymerase inhibitor                      |
| 0,488 | 0,046 | Exoribonuclease II inhibitor                               |
| 0,520 | 0,084 | Kidney function stimulant                                  |
| 0,445 | 0,010 | Endo-1,3(4)-beta-glucanase inhibitor                       |
| 0,485 | 0,051 | 1,4-Lactonase inhibitor                                    |
| 0,503 | 0,071 | Phthalate 4,5-dioxygenase inhibitor                        |
| 0,472 | 0,045 | Cyclic AMP agonist                                         |
| 0,496 | 0,069 | Platelet adhesion inhibitor                                |
| 0,463 | 0,039 | TNF expression inhibitor                                   |
| 0,445 | 0,020 | Hematopoietic inhibitor                                    |
| 0,459 | 0,035 | Na <sup>+</sup> -transporting two-sector ATPase inhibitor  |
| 0,485 | 0,062 | GST A substrate                                            |
| 0,543 | 0,121 | Membrane permeability inhibitor                            |
| 0,453 | 0,031 | Aspergillopepsin I inhibitor                               |
| 0,469 | 0,051 | Hydrogen dehydrogenase inhibitor                           |
| 0,462 | 0,046 | Gluconate 5-dehydrogenase inhibitor                        |
| 0,466 | 0,050 | Trimethylamine-oxide aldolase inhibitor                    |
| 0,430 | 0,017 | Oxidizing agent                                            |
| 0,442 | 0,031 | Cardiovascular analeptic                                   |
| 0,424 | 0,012 | Sweetener                                                  |
| 0,480 | 0,069 | Phospholipid-translocating ATPase inhibitor                |
| 0,448 | 0,041 | Acetylesterase inhibitor                                   |
| 0,487 | 0,083 | Acetylcholine neuromuscular blocking agent                 |
| 0,438 | 0,037 | Simian immunodeficiency virus proteinase inhibitor         |
| 0,463 | 0,063 | Phosphatidylcholine-retinol O-acyltransferase inhibitor    |

|       |       |                                                                                                 |
|-------|-------|-------------------------------------------------------------------------------------------------|
| 0,411 | 0,013 | Uterine relaxant                                                                                |
| 0,398 | 0,002 | Transactivator transcription protein inhibitor                                                  |
| 0,490 | 0,096 | Fusarinine-C ornithinesterase inhibitor                                                         |
| 0,497 | 0,103 | Membrane integrity agonist                                                                      |
| 0,418 | 0,025 | Xylan endo-1,3-beta-xylosidase inhibitor                                                        |
| 0,451 | 0,060 | Arginine 2-monooxygenase inhibitor                                                              |
| 0,412 | 0,024 | Taurine-2-oxoglutarate transaminase inhibitor                                                   |
| 0,435 | 0,048 | Alkenylglycerophosphoethanolamine hydrolase inhibitor                                           |
| 0,409 | 0,022 | Sorbitol-6-phosphate 2-dehydrogenase inhibitor                                                  |
| 0,469 | 0,083 | Protein-disulfide reductase (glutathione) inhibitor                                             |
| 0,426 | 0,041 | Limulus clotting factor C inhibitor                                                             |
| 0,458 | 0,074 | Thioredoxin inhibitor                                                                           |
| 0,388 | 0,007 | Insecticide                                                                                     |
| 0,453 | 0,072 | Alopecia treatment                                                                              |
| 0,413 | 0,033 | Sulfite oxidase inhibitor                                                                       |
| 0,394 | 0,015 | Antipruritic, non-allergic                                                                      |
| 0,410 | 0,032 | Glucan 1,4-alpha-maltotetraohydrolase inhibitor                                                 |
| 0,432 | 0,056 | Cl--transporting ATPase inhibitor                                                               |
| 0,425 | 0,048 | Analeptic                                                                                       |
| 0,423 | 0,048 | Acetylgalactosaminyl-O-glycosyl-glycoprotein beta-1,3-N-acetylglucosaminyltransferase inhibitor |
| 0,404 | 0,030 | H+-exporting ATPase inhibitor                                                                   |
| 0,404 | 0,032 | Poly(beta-D-mannuronate) lyase inhibitor                                                        |
| 0,467 | 0,095 | CYP3A2 substrate                                                                                |
| 0,411 | 0,040 | EIF4E expression inhibitor                                                                      |
| 0,400 | 0,030 | Glycolate dehydrogenase inhibitor                                                               |
| 0,393 | 0,023 | CDP-diacylglycerol-glycerol-3-phosphate 3-phosphatidyltransferase inhibitor                     |
| 0,396 | 0,027 | Shikimate O-hydroxycinnamoyltransferase inhibitor                                               |
| 0,433 | 0,065 | Fatty-acyl-CoA synthase inhibitor                                                               |
| 0,423 | 0,055 | Formaldehyde transketolase inhibitor                                                            |
| 0,414 | 0,048 | Cyclohexanone monooxygenase inhibitor                                                           |
| 0,430 | 0,064 | Fragilysin inhibitor                                                                            |
| 0,416 | 0,051 | N-acetylneuraminate 7-O(or 9-O)-acetyltransferase inhibitor                                     |
| 0,417 | 0,054 | Antipruritic                                                                                    |
| 0,422 | 0,058 | Apyrase inhibitor                                                                               |
| 0,365 | 0,003 | Antineoplastic (bone cancer)                                                                    |
| 0,434 | 0,072 | Lysine 2,3-aminomutase inhibitor                                                                |
| 0,416 | 0,055 | CYP2A8 substrate                                                                                |

|       |       |                                                                                           |
|-------|-------|-------------------------------------------------------------------------------------------|
| 0,373 | 0,012 | Vascular dementia treatment                                                               |
| 0,362 | 0,004 | CYP2B18 substrate                                                                         |
| 0,425 | 0,068 | Dehydro-L-gulonate decarboxylase inhibitor                                                |
| 0,407 | 0,051 | Thymidylate 5'-phosphatase inhibitor                                                      |
| 0,362 | 0,006 | GST T substrate                                                                           |
| 0,362 | 0,006 | GST T1-1 substrate                                                                        |
| 0,357 | 0,001 | Prostaglandin EP2 agonist                                                                 |
| 0,358 | 0,002 | Interleukin 10 antagonist                                                                 |
| 0,360 | 0,006 | Osteoarthritis treatment                                                                  |
| 0,393 | 0,038 | Antiviral (Herpes)                                                                        |
| 0,445 | 0,091 | Ovulation inhibitor                                                                       |
| 0,383 | 0,030 | Clavamate synthase inhibitor                                                              |
| 0,360 | 0,007 | Alpha-pinene-oxide decyclase inhibitor                                                    |
| 0,436 | 0,084 | Antiviral (Picornavirus)                                                                  |
| 0,386 | 0,035 | CYP7 inhibitor                                                                            |
| 0,359 | 0,007 | Ligase inhibitor                                                                          |
| 0,376 | 0,025 | Myeloblastin inhibitor                                                                    |
| 0,368 | 0,018 | 2-Haloacid dehalogenase (configuration-inverting) inhibitor                               |
| 0,460 | 0,112 | Calcium channel (voltage-sensitive) activator                                             |
| 0,396 | 0,050 | GABA aminotransferase inhibitor                                                           |
| 0,408 | 0,065 | CYP2D15 substrate                                                                         |
| 0,358 | 0,015 | Maltose-transporting ATPase inhibitor                                                     |
| 0,410 | 0,068 | CYP2D16 substrate                                                                         |
| 0,412 | 0,072 | Vasoprotector                                                                             |
| 0,379 | 0,039 | 2-Haloacid dehalogenase inhibitor                                                         |
| 0,386 | 0,047 | Creatininase inhibitor                                                                    |
| 0,377 | 0,038 | Undecaprenyldiphospho-muramoylpentapeptide beta-N-acetylglucosaminyltransferase inhibitor |
| 0,388 | 0,050 | Malate oxidase inhibitor                                                                  |
| 0,418 | 0,081 | CYP3A1 substrate                                                                          |
| 0,437 | 0,101 | CYP2C12 substrate                                                                         |
| 0,430 | 0,096 | NADPH-cytochrome-c2 reductase inhibitor                                                   |
| 0,375 | 0,041 | Dextranase inhibitor                                                                      |
| 0,364 | 0,031 | Yeast ribonuclease inhibitor                                                              |
| 0,369 | 0,035 | DELTA14-sterol reductase inhibitor                                                        |
| 0,357 | 0,024 | Sclerosant                                                                                |
| 0,374 | 0,042 | Mannose isomerase inhibitor                                                               |
| 0,367 | 0,037 | Fructan beta-fructosidase inhibitor                                                       |

|       |       |                                                              |
|-------|-------|--------------------------------------------------------------|
| 0,414 | 0,084 | Leukopoiesis stimulant                                       |
| 0,367 | 0,038 | Cyclomaltodextrinase inhibitor                               |
| 0,410 | 0,082 | Erythropoiesis stimulant                                     |
| 0,350 | 0,024 | Styrene-oxide isomerase inhibitor                            |
| 0,332 | 0,007 | Antineoplastic, alkylator                                    |
| 0,382 | 0,058 | Mucinaminyserine mucinaminidase inhibitor                    |
| 0,348 | 0,025 | Phosphoenolpyruvate mutase inhibitor                         |
| 0,340 | 0,018 | Undecaprenyl-diphosphatase inhibitor                         |
| 0,393 | 0,070 | Polyamine-transporting ATPase inhibitor                      |
| 0,370 | 0,048 | Nitrite reductase (NO-forming) inhibitor                     |
| 0,424 | 0,103 | Chlordecone reductase inhibitor                              |
| 0,381 | 0,060 | Glycerol-3-phosphate oxidase inhibitor                       |
| 0,410 | 0,091 | Antiseborrheic                                               |
| 0,371 | 0,054 | CYP2D2 inhibitor                                             |
| 0,405 | 0,089 | Neurotransmitter antagonist                                  |
| 0,345 | 0,030 | D-alanine 2-hydroxymethyltransferase inhibitor               |
| 0,413 | 0,099 | 5 Hydroxytryptamine uptake stimulant                         |
| 0,389 | 0,075 | Beta-adrenergic receptor kinase inhibitor                    |
| 0,389 | 0,075 | G-protein-coupled receptor kinase inhibitor                  |
| 0,368 | 0,054 | Steroid N-acetylglucosaminytransferase inhibitor             |
| 0,357 | 0,044 | 2-Hydroxymuconate-semialdehyde hydrolase inhibitor           |
| 0,381 | 0,068 | Phenol O-methyltransferase inhibitor                         |
| 0,378 | 0,066 | Antimyopathies                                               |
| 0,398 | 0,089 | (R)-6-hydroxynicotine oxidase inhibitor                      |
| 0,352 | 0,043 | Opioid kappa 3 receptor antagonist                           |
| 0,361 | 0,053 | Phosphopantothenoylecysteine decarboxylase inhibitor         |
| 0,387 | 0,080 | Ecdysone 20-monooxygenase inhibitor                          |
| 0,338 | 0,031 | Hyaluronic acid agonist                                      |
| 0,339 | 0,034 | GST M substrate                                              |
| 0,369 | 0,064 | Tpr proteinase ( <i>Porphyromonas gingivalis</i> ) inhibitor |
| 0,372 | 0,068 | (S)-6-hydroxynicotine oxidase inhibitor                      |
| 0,374 | 0,071 | Adenomatous polyposis treatment                              |
| 0,344 | 0,042 | Glyoxylate oxidase inhibitor                                 |
| 0,338 | 0,037 | Carminative                                                  |
| 0,357 | 0,056 | N-formylmethionyl-peptidase inhibitor                        |
| 0,379 | 0,079 | Linoleate diol synthase inhibitor                            |
| 0,372 | 0,072 | Membrane permeability enhancer                               |

|       |       |                                                                              |
|-------|-------|------------------------------------------------------------------------------|
| 0,300 | 0,002 | Prostaglandin D2 agonist                                                     |
| 0,383 | 0,086 | 4-Nitrophenol 2-monooxygenase inhibitor                                      |
| 0,389 | 0,092 | Histamine release stimulant                                                  |
| 0,325 | 0,028 | Licheninase inhibitor                                                        |
| 0,382 | 0,086 | Fibrolase inhibitor                                                          |
| 0,297 | 0,004 | Insulin secretagoues                                                         |
| 0,352 | 0,059 | Peptide-N4-(N-acetyl-beta-glucosaminy)asparagine amidase inhibitor           |
| 0,371 | 0,078 | Aspartate-phenylpyruvate transaminase inhibitor                              |
| 0,379 | 0,086 | Dimethylargininase inhibitor                                                 |
| 0,389 | 0,097 | Aminobutyraldehyde dehydrogenase inhibitor                                   |
| 0,397 | 0,105 | Antineoplastic                                                               |
| 0,318 | 0,026 | Fumarate reductase (NADH) inhibitor                                          |
| 0,329 | 0,038 | CYP2B10 substrate                                                            |
| 0,324 | 0,035 | Oryzin inhibitor                                                             |
| 0,329 | 0,040 | 2,3,4,5-Tetrahydropyridine-2,6-dicarboxylate N-succinyltransferase inhibitor |
| 0,365 | 0,078 | Manganese peroxidase inhibitor                                               |
| 0,365 | 0,081 | Pro-opiomelanocortin converting enzyme inhibitor                             |
| 0,347 | 0,064 | Phosphoinositide 5-phosphatase inhibitor                                     |
| 0,331 | 0,048 | CYP2A2 substrate                                                             |
| 0,374 | 0,091 | CYP2A1 substrate                                                             |
| 0,324 | 0,042 | Quinoprotein glucose dehydrogenase inhibitor                                 |
| 0,327 | 0,044 | DNA synthesis inhibitor                                                      |
| 0,319 | 0,037 | Chaperonin ATPase inhibitor                                                  |
| 0,359 | 0,080 | Caspase 8 stimulant                                                          |
| 0,346 | 0,067 | Prostaglandin-A1 DELTA-isomerase inhibitor                                   |
| 0,309 | 0,031 | Galactolipase inhibitor                                                      |
| 0,306 | 0,030 | Bisphosphoglycerate mutase inhibitor                                         |
| 0,358 | 0,082 | CYP4A11 substrate                                                            |
| 0,337 | 0,062 | Lysostaphin inhibitor                                                        |
| 0,351 | 0,076 | Histidine N-acetyltransferase inhibitor                                      |
| 0,336 | 0,062 | tRNA-pseudouridine synthase I inhibitor                                      |
| 0,334 | 0,061 | 3-Phytase inhibitor                                                          |
| 0,303 | 0,031 | Vitamin-K-epoxide reductase (warfarin-insensitive) inhibitor                 |
| 0,305 | 0,033 | Aspergillopepsin II inhibitor                                                |
| 0,322 | 0,051 | Hydroxylamine reductase (NADH) inhibitor                                     |
| 0,301 | 0,030 | Antineoplastic (small cell lung cancer)                                      |
| 0,348 | 0,081 | Hydroxylamine oxidase inhibitor                                              |

|       |       |                                                                 |
|-------|-------|-----------------------------------------------------------------|
| 0,303 | 0,037 | Alpha-N-acetylglucosaminidase inhibitor                         |
| 0,272 | 0,005 | Cytokine release inhibitor                                      |
| 0,307 | 0,042 | Steroid synthesis inhibitor                                     |
| 0,350 | 0,086 | Sphinganine kinase inhibitor                                    |
| 0,332 | 0,069 | RELA expression inhibitor                                       |
| 0,288 | 0,025 | 3-Chloro-D-alanine dehydrochlorinase inhibitor                  |
| 0,296 | 0,035 | Alkylglycerophosphoethanolamine phosphodiesterase inhibitor     |
| 0,353 | 0,091 | Rubredoxin-NAD <sup>+</sup> reductase inhibitor                 |
| 0,282 | 0,022 | 2-Dehydropantoate aldolase inhibitor                            |
| 0,354 | 0,095 | Pancreatic elastase inhibitor                                   |
| 0,327 | 0,068 | Alcohol dehydrogenase (acceptor) inhibitor                      |
| 0,320 | 0,061 | CYP2A5 substrate                                                |
| 0,293 | 0,036 | Polyneuridine-aldehyde esterase inhibitor                       |
| 0,283 | 0,026 | Hydroxysteroid dehydrogenase inhibitor                          |
| 0,344 | 0,087 | Centromere associated protein inhibitor                         |
| 0,321 | 0,067 | 3-Cyanoalanine hydratase inhibitor                              |
| 0,304 | 0,050 | CYP2G1 substrate                                                |
| 0,293 | 0,040 | Antihelmintic                                                   |
| 0,378 | 0,126 | Antinociceptive                                                 |
| 0,301 | 0,049 | CYP2C29 substrate                                               |
| 0,254 | 0,002 | Prostaglandin E2 agonist                                        |
| 0,321 | 0,070 | Glutamine-phenylpyruvate transaminase inhibitor                 |
| 0,329 | 0,079 | Leukopoiesis inhibitor                                          |
| 0,303 | 0,053 | Transketolase inhibitor                                         |
| 0,291 | 0,041 | N-Acyl-D-aspartate deacylase inhibitor                          |
| 0,299 | 0,050 | Linoleoyl-CoA desaturase inhibitor                              |
| 0,330 | 0,080 | Methylamine-glutamate N-methyltransferase inhibitor             |
| 0,291 | 0,043 | Protein-Npi-phosphohistidine-sugar phosphotransferase inhibitor |
| 0,374 | 0,126 | Thromboxane B2 antagonist                                       |
| 0,304 | 0,056 | Antihypercholesterolemic                                        |
| 0,358 | 0,111 | 2-Dehydropantoate 2-reductase inhibitor                         |
| 0,326 | 0,079 | CYP2F1 substrate                                                |
| 0,286 | 0,040 | Poly(alpha-L-gulonate) lyase inhibitor                          |
| 0,335 | 0,089 | Cytochrome P450 stimulant                                       |
| 0,328 | 0,082 | (R)-Pantolactone dehydrogenase (flavin) inhibitor               |
| 0,265 | 0,021 | Galacturan 1,4-alpha-galacturonidase inhibitor                  |
| 0,319 | 0,075 | ADP-thymidine kinase inhibitor                                  |

|       |       |                                                     |
|-------|-------|-----------------------------------------------------|
| 0,335 | 0,092 | Glucose oxidase inhibitor                           |
| 0,286 | 0,042 | Pseudouridylate synthase inhibitor                  |
| 0,315 | 0,072 | Phosphatidylinositol diacylglycerol-lyase inhibitor |
| 0,261 | 0,019 | Deoxyribonuclease I inhibitor                       |
| 0,319 | 0,077 | Chenodeoxycholytaurine hydrolase inhibitor          |
| 0,246 | 0,006 | 4-Carboxymethyl-4-methylbutenolide mutase inhibitor |
| 0,258 | 0,018 | Melanin inhibitor                                   |
| 0,268 | 0,028 | Alpha-glucuronidase inhibitor                       |
| 0,335 | 0,097 | Endopeptidase So inhibitor                          |
| 0,309 | 0,071 | Chitosanase inhibitor                               |
| 0,304 | 0,066 | Cytostatic                                          |
| 0,298 | 0,061 | Lysyl oxidase inhibitor                             |
| 0,319 | 0,082 | Fucoesterol-epoxide lyase inhibitor                 |
| 0,282 | 0,046 | Horrisysin inhibitor                                |
| 0,294 | 0,058 | Antiparasitic                                       |
| 0,329 | 0,094 | CYP2C9 inducer                                      |
| 0,247 | 0,012 | Arachidonic acid antagonist                         |
| 0,263 | 0,028 | Tropinesterase inhibitor                            |
| 0,291 | 0,057 | Opheline kinase inhibitor                           |
| 0,291 | 0,057 | Taurocyamine kinase inhibitor                       |
| 0,309 | 0,076 | Adenylyl-sulfate reductase inhibitor                |
| 0,276 | 0,044 | Dopamine release stimulant                          |
| 0,304 | 0,071 | N-acylmannosamine kinase inhibitor                  |
| 0,278 | 0,046 | Antiperistaltic                                     |
| 0,334 | 0,103 | Gonadotropin antagonist                             |
| 0,308 | 0,077 | CYP3A7 substrate                                    |
| 0,334 | 0,103 | Biotinidase inhibitor                               |
| 0,294 | 0,063 | Antineoplastic (pancreatic cancer)                  |
| 0,289 | 0,059 | NF-E2-related factor 2 stimulant                    |
| 0,328 | 0,100 | Malate dehydrogenase (acceptor) inhibitor           |
| 0,258 | 0,030 | Rhizopuspepsin inhibitor                            |
| 0,282 | 0,054 | Adrenaline release stimulant                        |
| 0,291 | 0,064 | Long-chain-aldehyde dehydrogenase inhibitor         |
| 0,328 | 0,101 | S-formylglutathione hydrolase inhibitor             |
| 0,247 | 0,020 | Antihypotensive                                     |
| 0,282 | 0,055 | Levanase inhibitor                                  |
| 0,299 | 0,075 | D-lactaldehyde dehydrogenase inhibitor              |

|       |       |                                                                          |
|-------|-------|--------------------------------------------------------------------------|
| 0,288 | 0,063 | Glycerol-3-phosphate dehydrogenase inhibitor                             |
| 0,316 | 0,092 | Sulfite dehydrogenase inhibitor                                          |
| 0,358 | 0,134 | Octopamine antagonist                                                    |
| 0,272 | 0,049 | 2-Oxoaldehyde dehydrogenase (NADP+) inhibitor                            |
| 0,271 | 0,048 | UGT2B28 substrate                                                        |
| 0,298 | 0,075 | Isopenicillin-N epimerase inhibitor                                      |
| 0,265 | 0,043 | Anthranilate-CoA ligase inhibitor                                        |
| 0,295 | 0,073 | Peptide alpha-N-acetyltransferase inhibitor                              |
| 0,280 | 0,059 | Bisphosphoglycerate phosphatase inhibitor                                |
| 0,355 | 0,134 | Fructose 5-dehydrogenase inhibitor                                       |
| 0,280 | 0,060 | Dipeptidase E inhibitor                                                  |
| 0,289 | 0,069 | Glutamate-tRNA ligase inhibitor                                          |
| 0,235 | 0,015 | Trehalose-phosphatase inhibitor                                          |
| 0,282 | 0,063 | Endothelial growth factor antagonist                                     |
| 0,256 | 0,037 | D-xylulose reductase inhibitor                                           |
| 0,268 | 0,050 | 2-Hydroxy-3-oxoadipate synthase inhibitor                                |
| 0,250 | 0,033 | 1,4-Alpha-glucan branching enzyme inhibitor                              |
| 0,262 | 0,045 | Mannitol-1-phosphatase inhibitor                                         |
| 0,307 | 0,090 | Plastoquinol-plastocyanin reductase inhibitor                            |
| 0,289 | 0,072 | Pyruvate decarboxylase inhibitor                                         |
| 0,278 | 0,062 | Salicylate 1-monooxygenase inhibitor                                     |
| 0,245 | 0,029 | BRAF expression inhibitor                                                |
| 0,309 | 0,095 | MMP9 expression inhibitor                                                |
| 0,278 | 0,064 | MAP kinase kinase 4 inhibitor                                            |
| 0,270 | 0,056 | Benzaldehyde dehydrogenase (NADP+) inhibitor                             |
| 0,242 | 0,028 | GABA B receptor agonist                                                  |
| 0,289 | 0,075 | N-benzyloxycarbonylglycine hydrolase inhibitor                           |
| 0,305 | 0,092 | Peptidyl-dipeptidase Dcp inhibitor                                       |
| 0,263 | 0,050 | Aldosterone antagonist                                                   |
| 0,266 | 0,053 | Flavin-containing monooxygenase inhibitor                                |
| 0,297 | 0,084 | Enteropeptidase inhibitor                                                |
| 0,230 | 0,017 | Alpha-N-acetylgalactosaminidase inhibitor                                |
| 0,275 | 0,062 | Gluconolactonase inhibitor                                               |
| 0,258 | 0,046 | N-acetyllactosaminide beta-1,3-N-acetylglucosaminyltransferase inhibitor |
| 0,278 | 0,066 | NADH kinase inhibitor                                                    |
| 0,248 | 0,037 | NAD+ synthase (glutamine-hydrolysing) inhibitor                          |
| 0,262 | 0,052 | Glutarate-semialdehyde dehydrogenase inhibitor                           |

|       |       |                                                                                  |
|-------|-------|----------------------------------------------------------------------------------|
| 0,338 | 0,130 | Pin1 inhibitor                                                                   |
| 0,223 | 0,016 | (R)-limonene 6-monooxygenase inhibitor                                           |
| 0,313 | 0,106 | Lipoprotein lipase inhibitor                                                     |
| 0,222 | 0,015 | Antiemphysemic                                                                   |
| 0,210 | 0,003 | Lipase inhibitor                                                                 |
| 0,251 | 0,044 | Dynein ATPase inhibitor                                                          |
| 0,312 | 0,106 | 5 Hydroxytryptamine release stimulant                                            |
| 0,320 | 0,115 | Nitrate reductase (cytochrome) inhibitor                                         |
| 0,251 | 0,046 | Cellulose 1,4-beta-cellobiosidase inhibitor                                      |
| 0,245 | 0,041 | Aureolysin inhibitor                                                             |
| 0,286 | 0,081 | Methylumbelliferyl-acetate deacetylase inhibitor                                 |
| 0,303 | 0,099 | Cyanoalanine nitrilase inhibitor                                                 |
| 0,233 | 0,030 | Alkene monooxygenase inhibitor                                                   |
| 0,252 | 0,051 | Prunasin beta-glucosidase inhibitor                                              |
| 0,268 | 0,067 | Thiamine pyridinylase inhibitor                                                  |
| 0,265 | 0,065 | Morphine 6-dehydrogenase inhibitor                                               |
| 0,257 | 0,057 | N-hydroxy-2-acetamidofluorene reductase inhibitor                                |
| 0,222 | 0,022 | Riboflavin phosphotransferase inhibitor                                          |
| 0,291 | 0,091 | Arylsulfate sulfotransferase inhibitor                                           |
| 0,232 | 0,032 | Aldehyde dehydrogenase inhibitor                                                 |
| 0,227 | 0,028 | Ferredoxin-NADP+ reductase inhibitor                                             |
| 0,262 | 0,063 | Transcription factor NF kappa A inhibitor                                        |
| 0,210 | 0,011 | CYP3A5 inducer                                                                   |
| 0,241 | 0,042 | Aryldialkylphosphatase inhibitor                                                 |
| 0,264 | 0,066 | Ethanolamine-phosphate cytidyltransferase inhibitor                              |
| 0,237 | 0,039 | Inulinase inhibitor                                                              |
| 0,284 | 0,086 | P-benzoquinone reductase (NADPH) inhibitor                                       |
| 0,338 | 0,140 | Oxygen scavenger                                                                 |
| 0,251 | 0,053 | Alpha-1,6-mannosyl-glycoprotein 4-beta-N-acetylglucosaminyltransferase inhibitor |
| 0,339 | 0,142 | MAP kinase stimulant                                                             |
| 0,375 | 0,180 | Antineurotic                                                                     |
| 0,244 | 0,049 | Polygalacturonase inhibitor                                                      |
| 0,251 | 0,056 | Pappalysin-1 inhibitor                                                           |
| 0,258 | 0,062 | Carboxypeptidase D inhibitor                                                     |
| 0,275 | 0,079 | Arylmalonate decarboxylase inhibitor                                             |
| 0,225 | 0,030 | Glucan 1,6-alpha-glucosidase inhibitor                                           |
| 0,272 | 0,077 | Opioid dependency treatment                                                      |

|       |       |                                                       |
|-------|-------|-------------------------------------------------------|
| 0,274 | 0,080 | Thiosulfate dehydrogenase inhibitor                   |
| 0,245 | 0,051 | 3-Methylbutanal reductase inhibitor                   |
| 0,235 | 0,042 | Glucan 1,4-beta-glucosidase inhibitor                 |
| 0,227 | 0,034 | Glycerol-1-phosphatase inhibitor                      |
| 0,235 | 0,042 | Lactaldehyde reductase inhibitor                      |
| 0,221 | 0,028 | 2,2-Dialkylglycine decarboxylase (pyruvate) inhibitor |
| 0,262 | 0,070 | S-alkylcysteine lyase inhibitor                       |
| 0,220 | 0,028 | Pancreatic endopeptidase E inhibitor                  |
| 0,273 | 0,081 | Aspergillus nuclease S1 inhibitor                     |
| 0,236 | 0,045 | Snapalysin inhibitor                                  |
| 0,244 | 0,053 | Glycine dehydrogenase (decarboxylating) inhibitor     |
| 0,239 | 0,049 | Cyclooxygenase substrate                              |
| 0,213 | 0,024 | Estradiol 17alpha-dehydrogenase inhibitor             |
| 0,318 | 0,129 | RNA-directed RNA polymerase inhibitor                 |
| 0,238 | 0,049 | 4-Chlorobenzoyl-CoA dehalogenase inhibitor            |
| 0,283 | 0,094 | Chitinase inhibitor                                   |
| 0,298 | 0,110 | Leukotriene-C4 synthase inhibitor                     |
| 0,225 | 0,037 | Aspartate-tRNA ligase inhibitor                       |
| 0,243 | 0,056 | GABA C receptor agonist                               |
| 0,257 | 0,072 | NOS2 expression inhibitor                             |
| 0,262 | 0,077 | Antibacterial                                         |
| 0,218 | 0,033 | Allantoate deiminase inhibitor                        |
| 0,222 | 0,037 | Bile-salt sulfotransferase inhibitor                  |
| 0,251 | 0,068 | Cyclohexyl-isocyanide hydratase inhibitor             |
| 0,222 | 0,039 | Cycloartenol synthase inhibitor                       |
| 0,209 | 0,027 | Carnitine dehydratase inhibitor                       |
| 0,254 | 0,072 | Thiamine-triphosphatase inhibitor                     |
| 0,239 | 0,057 | Crotonoyl-[acyl-carrier-protein] hydratase inhibitor  |
| 0,242 | 0,059 | Ornithine cyclodeaminase inhibitor                    |
| 0,268 | 0,087 | 4-Coumarate-CoA ligase inhibitor                      |
| 0,287 | 0,107 | Myc inhibitor                                         |
| 0,193 | 0,013 | Succinate dehydrogenase inhibitor                     |
| 0,244 | 0,064 | N-acetyllactosamine synthase inhibitor                |
| 0,256 | 0,077 | Arylesterase inhibitor                                |
| 0,212 | 0,032 | L-iduronidase inhibitor                               |
| 0,238 | 0,059 | N-(long-chain-acyl)ethanolamine deacylase inhibitor   |
| 0,216 | 0,038 | Cyclamate sulfohydrolase inhibitor                    |

|       |       |                                                             |
|-------|-------|-------------------------------------------------------------|
| 0,251 | 0,072 | Glutathione dehydrogenase (ascorbate) inhibitor             |
| 0,315 | 0,136 | Nicotine dehydrogenase inhibitor                            |
| 0,252 | 0,075 | Coccolysin inhibitor                                        |
| 0,303 | 0,125 | Apoptosis agonist                                           |
| 0,290 | 0,113 | CYP3A4 inducer                                              |
| 0,209 | 0,033 | Glycopeptide alpha-N-acetylgalactosaminidase inhibitor      |
| 0,209 | 0,033 | Glycerone-phosphate O-acyltransferase inhibitor             |
| 0,227 | 0,050 | Sedoheptulose-bisphosphatase inhibitor                      |
| 0,181 | 0,004 | Glycine receptor antagonist                                 |
| 0,251 | 0,075 | Aspartate-ammonia ligase inhibitor                          |
| 0,226 | 0,050 | Guanosine-3',5'-bis(diphosphate) 3'-diphosphatase inhibitor |
| 0,235 | 0,059 | Ubiquitin thiolesterase inhibitor                           |
| 0,197 | 0,022 | Interferon antagonist                                       |
| 0,280 | 0,105 | HMOX1 expression enhancer                                   |
| 0,225 | 0,050 | IgA-specific metalloendopeptidase inhibitor                 |
| 0,235 | 0,060 | Procollagen N-endopeptidase inhibitor                       |
| 0,299 | 0,125 | Amine dehydrogenase inhibitor                               |
| 0,282 | 0,108 | CYP3A inducer                                               |
| 0,209 | 0,036 | Retinyl-palmitate esterase inhibitor                        |
| 0,210 | 0,037 | Acetylenecarboxylate hydratase inhibitor                    |
| 0,176 | 0,004 | Anesthetic inhalation                                       |
| 0,270 | 0,099 | Ferredoxin-NAD+ reductase inhibitor                         |
| 0,270 | 0,099 | Naphthalene 1,2-dioxygenase inhibitor                       |
| 0,290 | 0,119 | Antihelminthic (Nematodes)                                  |
| 0,190 | 0,020 | Interferon gamma antagonist                                 |
| 0,223 | 0,052 | 2,3-Dihydroxyindole 2,3-dioxygenase inhibitor               |
| 0,252 | 0,081 | Carbon-monoxide dehydrogenase inhibitor                     |
| 0,267 | 0,097 | Para amino benzoic acid antagonist                          |
| 0,248 | 0,078 | Cholestanetriol 26-monooxygenase inhibitor                  |
| 0,270 | 0,101 | Nitrite reductase [NAD(P)H] inhibitor                       |
| 0,219 | 0,050 | Tetrahydroxynaphthalene reductase inhibitor                 |
| 0,171 | 0,003 | Prostaglandin EP1 antagonist                                |
| 0,247 | 0,079 | Phosphatidylcholine-sterol O-acyltransferase inhibitor      |
| 0,199 | 0,033 | Valine-tRNA ligase inhibitor                                |
| 0,183 | 0,017 | Demethylsterigmatocystin 6-O-methyltransferase inhibitor    |
| 0,216 | 0,050 | Sterol 3-beta-glucosyltransferase inhibitor                 |
| 0,256 | 0,090 | Antiviral (Poxvirus)                                        |

|       |       |                                                               |
|-------|-------|---------------------------------------------------------------|
| 0,210 | 0,044 | Alkylator                                                     |
| 0,284 | 0,118 | NAD(P)+-arginine ADP-ribosyltransferase inhibitor             |
| 0,197 | 0,031 | Protein-glucosylgalactosylhydroxylysine glucosidase inhibitor |
| 0,266 | 0,101 | 4-Hydroxymandelate oxidase inhibitor                          |
| 0,263 | 0,099 | DNA-(apurinic or apyrimidinic site) lyase inhibitor           |
| 0,225 | 0,061 | Rhodotorulapepsin inhibitor                                   |
| 0,193 | 0,028 | Pectin lyase inhibitor                                        |
| 0,293 | 0,128 | Polarisation stimulant                                        |
| 0,223 | 0,058 | D-threo-aldose 1-dehydrogenase inhibitor                      |
| 0,207 | 0,044 | Nitric oxide scavenger                                        |
| 0,204 | 0,041 | Phosphoenolpyruvate-protein phosphotransferase inhibitor      |
| 0,195 | 0,032 | Glucuronolactone reductase inhibitor                          |
| 0,232 | 0,070 | Di-trans,poly-cis-decaprenylcistransferase inhibitor          |
| 0,240 | 0,079 | Cell wall biosynthesis inhibitor                              |
| 0,237 | 0,076 | Lactose synthase inhibitor                                    |
| 0,318 | 0,157 | 2-Hydroxyquinoline 8-monooxygenase inhibitor                  |
| 0,180 | 0,020 | Isoamylase inhibitor                                          |
| 0,198 | 0,039 | Antineoplastic (lymphocytic leukemia)                         |
| 0,231 | 0,073 | Dimethylmaleate hydratase inhibitor                           |
| 0,244 | 0,086 | Succinate-semialdehyde dehydrogenase [NAD(P)+] inhibitor      |
| 0,204 | 0,047 | Antirickettsial                                               |
| 0,218 | 0,061 | Tauropine dehydrogenase inhibitor                             |
| 0,210 | 0,054 | Leucine dehydrogenase inhibitor                               |
| 0,243 | 0,087 | Antiviral (CMV)                                               |
| 0,285 | 0,130 | Glutathione thiolesterase inhibitor                           |
| 0,188 | 0,033 | Gaucher disease treatment                                     |
| 0,234 | 0,080 | [acyl-carrier-protein] S-acetyltransferase inhibitor          |
| 0,197 | 0,043 | Dolichyl-phosphatase inhibitor                                |
| 0,255 | 0,102 | Urethanase inhibitor                                          |
| 0,204 | 0,051 | Farnesyltranstransferase inhibitor                            |
| 0,194 | 0,042 | Ganglioside galactosyltransferase inhibitor                   |
| 0,192 | 0,039 | Thioredoxin reductase inhibitor                               |
| 0,207 | 0,055 | Alpha-amylase inhibitor                                       |
| 0,290 | 0,138 | Spermidine dehydrogenase inhibitor                            |
| 0,171 | 0,019 | Dry eye syndrome treatment                                    |
| 0,236 | 0,084 | CYP2C3 substrate                                              |
| 0,222 | 0,072 | Glycerol 2-dehydrogenase (NADP+) inhibitor                    |

|       |       |                                                             |
|-------|-------|-------------------------------------------------------------|
| 0,227 | 0,076 | Nardilysin inhibitor                                        |
| 0,226 | 0,076 | Gamma-D-Glutamyl-meso-diaminopimelate peptidase inhibitor   |
| 0,217 | 0,068 | UGT2B17 substrate                                           |
| 0,276 | 0,127 | CYP3A3 substrate                                            |
| 0,205 | 0,056 | Serratia marcescens nuclease inhibitor                      |
| 0,202 | 0,053 | Protein synthesis inhibitor                                 |
| 0,198 | 0,049 | Choline-sulfatase inhibitor                                 |
| 0,277 | 0,128 | CYP2E1 inducer                                              |
| 0,197 | 0,049 | Trans-pentaprenyltranstransferase inhibitor                 |
| 0,182 | 0,034 | Deoxyribose-phosphate aldolase inhibitor                    |
| 0,212 | 0,064 | Peptidyl-dipeptidase B inhibitor                            |
| 0,190 | 0,042 | Saccharolysin inhibitor                                     |
| 0,187 | 0,039 | Protein synthesis stimulant                                 |
| 0,185 | 0,039 | 3-Ketovalidoxyamine C-N-lyase inhibitor                     |
| 0,175 | 0,028 | Choloylglycine hydrolase inhibitor                          |
| 0,191 | 0,044 | Mannan endo-1,6-alpha-mannosidase inhibitor                 |
| 0,302 | 0,155 | Antihypoxic                                                 |
| 0,271 | 0,124 | Bilirubin oxidase inhibitor                                 |
| 0,226 | 0,081 | Meprin B inhibitor                                          |
| 0,170 | 0,024 | Aconitate decarboxylase inhibitor                           |
| 0,252 | 0,106 | Tyrosine 3 hydroxylase inhibitor                            |
| 0,252 | 0,107 | Formate-dihydrofolate ligase inhibitor                      |
| 0,244 | 0,099 | Aldehyde dehydrogenase (pyrroloquinoline-quinone) inhibitor |
| 0,206 | 0,061 | (S)-3-amino-2-methylpropionate transaminase inhibitor       |
| 0,274 | 0,130 | Gamma-guanidinobutyraldehyde dehydrogenase inhibitor        |
| 0,189 | 0,044 | Testosterone 17beta-dehydrogenase inhibitor                 |
| 0,161 | 0,016 | Shab potassium channel blocker                              |
| 0,195 | 0,050 | Vascular adhesion protein 1 inhibitor                       |
| 0,245 | 0,101 | AR expression inhibitor                                     |
| 0,195 | 0,052 | Granzyme A inhibitor                                        |
| 0,197 | 0,054 | Gamma-butyrobetaine dioxygenase inhibitor                   |
| 0,307 | 0,164 | Preneoplastic conditions treatment                          |
| 0,170 | 0,027 | Pregnane X receptor agonist                                 |
| 0,186 | 0,043 | Glutamate (mGluR5) agonist                                  |
| 0,226 | 0,084 | DNA ligase (ATP) inhibitor                                  |
| 0,186 | 0,044 | Polar-amino-acid-transporting ATPase inhibitor              |
| 0,182 | 0,041 | Allantoinase inhibitor                                      |

|       |       |                                                                        |
|-------|-------|------------------------------------------------------------------------|
| 0,146 | 0,004 | Prostaglandin EP2 antagonist                                           |
| 0,168 | 0,028 | Glyceraldehyde-3-phosphate dehydrogenase (phosphorylating) inhibitor   |
| 0,177 | 0,037 | Xylose isomerase inhibitor                                             |
| 0,224 | 0,085 | Glycine amidinotransferase inhibitor                                   |
| 0,247 | 0,108 | Antifungal                                                             |
| 0,254 | 0,115 | Antiinflammatory, intestinal                                           |
| 0,214 | 0,075 | CYP2A3 substrate                                                       |
| 0,242 | 0,103 | Leukotriene-B4 20-monooxygenase inhibitor                              |
| 0,238 | 0,100 | Phosphatidylserine decarboxylase inhibitor                             |
| 0,192 | 0,054 | ADP-ribosylarginine hydrolase inhibitor                                |
| 0,150 | 0,012 | Fatty-acyl-ethyl-ester synthase inhibitor                              |
| 0,220 | 0,082 | Proliferative diseases treatment                                       |
| 0,184 | 0,046 | N-acetylneuraminate synthase inhibitor                                 |
| 0,194 | 0,056 | N6-methyl-lysine oxidase inhibitor                                     |
| 0,246 | 0,108 | Methylenetetrahydrofolate reductase (NADPH) inhibitor                  |
| 0,198 | 0,061 | 2,4-Dichlorophenol 6-monooxygenase inhibitor                           |
| 0,189 | 0,053 | Laminaribiose phosphorylase inhibitor                                  |
| 0,172 | 0,036 | Glucarate dehydratase inhibitor                                        |
| 0,231 | 0,095 | DNA-3-methyladenine glycosylase I inhibitor                            |
| 0,186 | 0,050 | Glutamin-(asparagin-)ase inhibitor                                     |
| 0,302 | 0,166 | Sulfur reductase inhibitor                                             |
| 0,146 | 0,011 | Imidazoleglycerol-phosphate dehydratase inhibitor                      |
| 0,175 | 0,040 | Cholesterol oxidase inhibitor                                          |
| 0,144 | 0,010 | Acetylcholine M3 receptor agonist                                      |
| 0,165 | 0,031 | Trimethyllysine dioxygenase inhibitor                                  |
| 0,179 | 0,046 | Alpha-N-arabinofuranosidase inhibitor                                  |
| 0,341 | 0,208 | Mucomembranous protector                                               |
| 0,233 | 0,100 | Hepatoprotectant                                                       |
| 0,238 | 0,105 | Gingipain K inhibitor                                                  |
| 0,241 | 0,109 | Cytochrome-b5 reductase inhibitor                                      |
| 0,237 | 0,104 | Cis-1,2-dihydro-1,2-dihydroxynaphthalene dehydrogenase inhibitor       |
| 0,172 | 0,040 | Asparagine-tRNA ligase inhibitor                                       |
| 0,183 | 0,051 | Galactokinase inhibitor                                                |
| 0,260 | 0,128 | Loop diuretic                                                          |
| 0,287 | 0,155 | Caspase 3 stimulant                                                    |
| 0,174 | 0,043 | N-(5-amino-5-carboxypentanoyl)-L-cysteinyl-D-valine synthase inhibitor |
| 0,277 | 0,146 | N-hydroxyarylamine O-acetyltransferase inhibitor                       |

|       |       |                                                             |
|-------|-------|-------------------------------------------------------------|
| 0,146 | 0,016 | Mycodextranase inhibitor                                    |
| 0,192 | 0,061 | UGT1A5 substrate                                            |
| 0,265 | 0,134 | Mitochondrial processing peptidase inhibitor                |
| 0,193 | 0,063 | Tentoxilysin inhibitor                                      |
| 0,205 | 0,075 | Serine-pyruvate transaminase inhibitor                      |
| 0,220 | 0,090 | Prolyl aminopeptidase inhibitor                             |
| 0,232 | 0,103 | Indanol dehydrogenase inhibitor                             |
| 0,161 | 0,031 | 4-Alpha-glucanotransferase inhibitor                        |
| 0,191 | 0,061 | Isopenicillin-N synthase inhibitor                          |
| 0,162 | 0,033 | (S)-carnitine 3-dehydrogenase inhibitor                     |
| 0,243 | 0,114 | 4-Methoxybenzoate monooxygenase (O-demethylating) inhibitor |
| 0,232 | 0,104 | Acidifying agent non gastric                                |
| 0,170 | 0,041 | Acyl-lysine deacylase inhibitor                             |
| 0,273 | 0,145 | Menopausal disorders treatment                              |
| 0,239 | 0,112 | ICAM1 expression inhibitor                                  |
| 0,265 | 0,138 | Retinoic acid metabolism inhibitor                          |
| 0,203 | 0,077 | Cyclopropane-fatty-acyl-phospholipid synthase inhibitor     |
| 0,200 | 0,073 | Signal peptidase I inhibitor                                |
| 0,316 | 0,190 | Taurine dehydrogenase inhibitor                             |
| 0,167 | 0,041 | Serine 3-dehydrogenase inhibitor                            |
| 0,141 | 0,016 | Gentamicin 2"-nucleotidyltransferase inhibitor              |
| 0,191 | 0,066 | CDP-4-dehydro-6-deoxyglucose reductase inhibitor            |
| 0,158 | 0,033 | Creatinase inhibitor                                        |
| 0,193 | 0,068 | Antihelminthic (Fasciola)                                   |
| 0,188 | 0,063 | Glyoxylate reductase (NADP+) inhibitor                      |
| 0,188 | 0,064 | Sphinganine-1-phosphate aldolase inhibitor                  |
| 0,224 | 0,099 | CYP2B substrate                                             |
| 0,233 | 0,110 | Sigma receptor agonist                                      |
| 0,151 | 0,028 | Thermomycolin inhibitor                                     |
| 0,136 | 0,013 | Alpha glucosidase inhibitor                                 |
| 0,190 | 0,067 | 3-Hydroxy-4-oxoquinoline 2,4-dioxygenase inhibitor          |
| 0,166 | 0,043 | Selenocysteine lyase inhibitor                              |
| 0,150 | 0,027 | DELTA24-sterol reductase inhibitor                          |
| 0,216 | 0,093 | Uroporphyrinogen-III synthase inhibitor                     |
| 0,129 | 0,007 | Progesterone agonist                                        |
| 0,197 | 0,075 | Antihematotoxic                                             |
| 0,168 | 0,047 | Valine decarboxylase inhibitor                              |

|       |       |                                                                                 |
|-------|-------|---------------------------------------------------------------------------------|
| 0,131 | 0,009 | Osmotic diuretic                                                                |
| 0,216 | 0,094 | Antifibrinolytic                                                                |
| 0,181 | 0,059 | GST M1-1 substrate                                                              |
| 0,189 | 0,067 | Glutamate 5-kinase inhibitor                                                    |
| 0,211 | 0,091 | Peroxidase substrate                                                            |
| 0,261 | 0,141 | Cholesterol antagonist                                                          |
| 0,183 | 0,063 | N-acetylneuraminate 4-O-acetyltransferase inhibitor                             |
| 0,148 | 0,028 | Homocysteine desulfhydrase inhibitor                                            |
| 0,141 | 0,021 | Phosphatidylinositol 3-kinase stimulant                                         |
| 0,175 | 0,055 | Galactose oxidase inhibitor                                                     |
| 0,246 | 0,126 | Alkane 1-monooxygenase inhibitor                                                |
| 0,147 | 0,027 | Secretase alpha stimulant                                                       |
| 0,147 | 0,027 | Secretase stimulant                                                             |
| 0,215 | 0,096 | Oxytocic                                                                        |
| 0,167 | 0,048 | Pectate lyase inhibitor                                                         |
| 0,136 | 0,018 | High-mannose-oligosaccharide beta-1,4-N-acetylglucosaminyltransferase inhibitor |
| 0,151 | 0,033 | Choline dehydrogenase inhibitor                                                 |
| 0,206 | 0,088 | Bothrolysin inhibitor                                                           |
| 0,162 | 0,043 | Methionine decarboxylase inhibitor                                              |
| 0,175 | 0,057 | 3-Carboxyethylcatechol 2,3-dioxygenase inhibitor                                |
| 0,164 | 0,046 | CDP-diacylglycerol-inositol 3-phosphatidyltransferase inhibitor                 |
| 0,161 | 0,043 | Glutamate-1-semialdehyde 2,1-aminomutase inhibitor                              |
| 0,204 | 0,086 | Aminomuconate-semialdehyde dehydrogenase inhibitor                              |
| 0,144 | 0,026 | Beta-amylase inhibitor                                                          |
| 0,159 | 0,041 | Carboxymethylenebutenolidase inhibitor                                          |
| 0,200 | 0,084 | Retinal dehydrogenase inhibitor                                                 |
| 0,172 | 0,056 | Methyltransferase substrate                                                     |
| 0,146 | 0,030 | 2-Dehydropantolactone reductase (A-specific) inhibitor                          |
| 0,127 | 0,012 | Alpha,alpha-trehalose phosphorylase inhibitor                                   |
| 0,190 | 0,075 | CYP4A2 substrate                                                                |
| 0,221 | 0,106 | Methane monooxygenase inhibitor                                                 |
| 0,183 | 0,068 | Alkylglycerone-phosphate synthase inhibitor                                     |
| 0,218 | 0,104 | UGT2B4 substrate                                                                |
| 0,237 | 0,123 | Analgesic stimulant                                                             |
| 0,194 | 0,080 | 2,6-Dihydroxypyridine 3-monooxygenase inhibitor                                 |
| 0,146 | 0,033 | Nicotinamide-nucleotide adenyltransferase inhibitor                             |
| 0,158 | 0,046 | Dihydrouracil dehydrogenase (NAD+) inhibitor                                    |

|       |       |                                                                |
|-------|-------|----------------------------------------------------------------|
| 0,251 | 0,138 | Antiviral (Adenovirus)                                         |
| 0,176 | 0,063 | Vomilenine glucosyltransferase inhibitor                       |
| 0,148 | 0,036 | D-arabinonolactone oxidase inhibitor                           |
| 0,133 | 0,020 | Alternansucrase inhibitor                                      |
| 0,191 | 0,079 | Phosphatidylglycerophosphatase inhibitor                       |
| 0,180 | 0,068 | Mitochondrial intermediate peptidase inhibitor                 |
| 0,176 | 0,065 | tRNA nucleotidyltransferase inhibitor                          |
| 0,178 | 0,067 | Lipoxygenase substrate                                         |
| 0,142 | 0,031 | Glutamine-pyruvate transaminase inhibitor                      |
| 0,143 | 0,032 | Valine dehydrogenase (NADP+) inhibitor                         |
| 0,177 | 0,067 | Lactate 2-monooxygenase inhibitor                              |
| 0,182 | 0,071 | CYP2D1 substrate                                               |
| 0,167 | 0,057 | Geranylgeranyl-diphosphate geranylgeranyltransferase inhibitor |
| 0,218 | 0,108 | Prostaglandin-E2 9-reductase inhibitor                         |
| 0,221 | 0,112 | Cathepsin T inhibitor                                          |
| 0,152 | 0,043 | Endo-1,4-beta-xylanase inhibitor                               |
| 0,243 | 0,134 | 4-Hydroxyproline epimerase inhibitor                           |
| 0,178 | 0,069 | Carnosine synthase inhibitor                                   |
| 0,175 | 0,066 | UGT2B9 substrate                                               |
| 0,255 | 0,146 | Membrane integrity antagonist                                  |
| 0,187 | 0,078 | UGT2B10 substrate                                              |
| 0,165 | 0,057 | SMN2 expression enhancer                                       |
| 0,131 | 0,023 | Homoserine O-succinyltransferase inhibitor                     |
| 0,176 | 0,067 | Brachyurin inhibitor                                           |
| 0,134 | 0,025 | Tagaturonate reductase inhibitor                               |
| 0,134 | 0,025 | Fructuronate reductase inhibitor                               |
| 0,130 | 0,022 | Amino-acid racemase inhibitor                                  |
| 0,123 | 0,015 | Heme oxygenase inhibitor                                       |
| 0,187 | 0,080 | 2-Enoate reductase inhibitor                                   |
| 0,117 | 0,010 | Inositol 1,4,5-triphosphate receptor antagonist                |
| 0,133 | 0,026 | Hair growth stimulant                                          |
| 0,135 | 0,029 | Rhodopsin kinase inhibitor                                     |
| 0,149 | 0,043 | Phosphonoacetate hydrolase inhibitor                           |
| 0,146 | 0,039 | 1-Aminocyclopropane-1-carboxylate deaminase inhibitor          |
| 0,201 | 0,094 | Methanol dehydrogenase inhibitor                               |
| 0,140 | 0,033 | Glucan 1,3-beta-glucosidase inhibitor                          |
| 0,224 | 0,118 | 4-Nitrophenylphosphatase inhibitor                             |

|       |       |                                                             |
|-------|-------|-------------------------------------------------------------|
| 0,261 | 0,155 | Superoxide dismutase inhibitor                              |
| 0,200 | 0,094 | Carnitinamidase inhibitor                                   |
| 0,180 | 0,074 | N-acetyl-gamma-glutamyl-phosphate reductase inhibitor       |
| 0,221 | 0,115 | ATP phosphoribosyltransferase inhibitor                     |
| 0,160 | 0,055 | 3-Oxoadipate enol-lactonase inhibitor                       |
| 0,135 | 0,030 | Deoxycytidine deaminase inhibitor                           |
| 0,140 | 0,036 | Malonate-semialdehyde dehydrogenase inhibitor               |
| 0,198 | 0,094 | Hyponitrite reductase inhibitor                             |
| 0,223 | 0,119 | CYP2C6 substrate                                            |
| 0,148 | 0,044 | Glycosylphosphatidylinositol diacylglycerol-lyase inhibitor |
| 0,123 | 0,019 | Ca <sup>2+</sup> -transporting ATPase inhibitor             |
| 0,217 | 0,113 | Cyclic AMP modulator                                        |
| 0,141 | 0,037 | Deoxyribonuclease X inhibitor                               |
| 0,180 | 0,076 | Rhamnulose-1-phosphate aldolase inhibitor                   |
| 0,186 | 0,083 | Phenylalanine(histidine) transaminase inhibitor             |
| 0,133 | 0,030 | Isomaltulose synthase inhibitor                             |
| 0,224 | 0,121 | Monoamine uptake inhibitor                                  |
| 0,177 | 0,074 | Dolichol kinase inhibitor                                   |
| 0,130 | 0,027 | Ribose-5-phosphate-ammonia ligase inhibitor                 |
| 0,170 | 0,067 | 3'-Nucleotidase inhibitor                                   |
| 0,200 | 0,097 | Bontoxilysin inhibitor                                      |
| 0,181 | 0,079 | CYP4F2 substrate                                            |
| 0,177 | 0,075 | 2,4-Diaminopentanoate dehydrogenase inhibitor               |
| 0,177 | 0,075 | 3-Hydroxybutyryl-CoA dehydrogenase inhibitor                |
| 0,177 | 0,075 | Lysine 6-dehydrogenase inhibitor                            |
| 0,168 | 0,066 | Allantoin racemase inhibitor                                |
| 0,163 | 0,061 | Glucosyl transferase inhibitor                              |
| 0,148 | 0,046 | Beta-mannosidase inhibitor                                  |
| 0,129 | 0,027 | Arabinose isomerase inhibitor                               |
| 0,157 | 0,056 | Chitin synthase inhibitor                                   |
| 0,229 | 0,128 | RNA synthesis inhibitor                                     |
| 0,115 | 0,014 | Arabinogalactan endo-1,4-beta-galactosidase inhibitor       |
| 0,150 | 0,049 | 2-Oxoisovalerate dehydrogenase (acylating) inhibitor        |
| 0,229 | 0,128 | Venom exonuclease inhibitor                                 |
| 0,185 | 0,085 | Gallate decarboxylase inhibitor                             |
| 0,174 | 0,074 | Aldehyde dehydrogenase 2 substrate                          |
| 0,139 | 0,040 | Fructose-2,6-bisphosphate 6-phosphatase inhibitor           |

|       |       |                                               |
|-------|-------|-----------------------------------------------|
| 0,149 | 0,049 | Antineoplastic antimetabolite                 |
| 0,166 | 0,067 | Calcium-sensing receptor agonist              |
| 0,155 | 0,056 | Hepatocyte nuclear factor antagonist          |
| 0,155 | 0,056 | Hepatocyte nuclear factor 4 alpha antagonist  |
| 0,111 | 0,013 | D-lactate-2-sulfatase inhibitor               |
| 0,260 | 0,161 | CYP19A1 expression inhibitor                  |
| 0,145 | 0,047 | Urolithiasis treatment                        |
| 0,123 | 0,026 | 2-Methyleneglutarate mutase inhibitor         |
| 0,146 | 0,050 | Agmatinase inhibitor                          |
| 0,190 | 0,095 | Alanine-tRNA ligase inhibitor                 |
| 0,213 | 0,117 | X-methyl-His dipeptidase inhibitor            |
| 0,160 | 0,065 | Homoserine dehydrogenase inhibitor            |
| 0,111 | 0,015 | Alpha,alpha-phosphotrehalase inhibitor        |
| 0,215 | 0,120 | Myosin ATPase inhibitor                       |
| 0,147 | 0,052 | D-lactate dehydrogenase inhibitor             |
| 0,136 | 0,040 | Cytochrome-c3 hydrogenase inhibitor           |
| 0,142 | 0,047 | Lactaldehyde reductase (NADPH) inhibitor      |
| 0,152 | 0,057 | Diisopropyl-fluorophosphatase inhibitor       |
| 0,138 | 0,044 | Omega-amidase inhibitor                       |
| 0,142 | 0,048 | CYP19 substrate                               |
| 0,158 | 0,064 | Cerebroside-sulfatase inhibitor               |
| 0,132 | 0,039 | Sorbose dehydrogenase inhibitor               |
| 0,101 | 0,008 | Glutamate (mGluR3) agonist                    |
| 0,193 | 0,100 | Nucleoside oxidase (H2O2-forming) inhibitor   |
| 0,175 | 0,082 | 6-Carboxyhexanoate-CoA ligase inhibitor       |
| 0,175 | 0,082 | Triacetate-lactonase inhibitor                |
| 0,175 | 0,082 | Homoaconitate hydratase inhibitor             |
| 0,175 | 0,082 | Biotin-CoA ligase inhibitor                   |
| 0,158 | 0,066 | Lipotropic                                    |
| 0,177 | 0,085 | Camphor 1,2-monooxygenase inhibitor           |
| 0,132 | 0,040 | Gluconate dehydratase inhibitor               |
| 0,165 | 0,073 | Pyruvate dehydrogenase (cytochrome) inhibitor |
| 0,165 | 0,073 | Trans-2-enoyl-CoA reductase (NAD+) inhibitor  |
| 0,169 | 0,077 | Antimycoplasmal                               |
| 0,176 | 0,084 | Metallo-carboxypeptidase D inhibitor          |
| 0,158 | 0,067 | Gly-X carboxypeptidase inhibitor              |
| 0,127 | 0,036 | 1,5-Anhydro-D-fructose reductase inhibitor    |

|       |       |                                                                                            |
|-------|-------|--------------------------------------------------------------------------------------------|
| 0,117 | 0,027 | 2-Methylcitrate dehydratase inhibitor                                                      |
| 0,175 | 0,084 | Guanidinoacetate kinase inhibitor                                                          |
| 0,194 | 0,103 | Alcohol dehydrogenase [NAD(P)+] inhibitor                                                  |
| 0,129 | 0,039 | Glycerophosphocholine cholinephosphodiesterase inhibitor                                   |
| 0,284 | 0,194 | Mucositis treatment                                                                        |
| 0,115 | 0,026 | Inositol-3-phosphate synthase inhibitor                                                    |
| 0,170 | 0,081 | Inorganic diphosphatase inhibitor                                                          |
| 0,150 | 0,061 | Iron-cytochrome-c reductase inhibitor                                                      |
| 0,151 | 0,062 | Cellulase inhibitor                                                                        |
| 0,219 | 0,130 | NADPH-ferrihemoprotein reductase inhibitor                                                 |
| 0,112 | 0,024 | 11-Cis-retinyl-palmitate hydrolase inhibitor                                               |
| 0,119 | 0,030 | Phosphatidylglycerol-membrane-oligosaccharide glycerophosphotransferase inhibitor          |
| 0,129 | 0,040 | Aerobactin synthase inhibitor                                                              |
| 0,137 | 0,049 | 2-Amino adipate transaminase inhibitor                                                     |
| 0,127 | 0,039 | 2-Aminoethylphosphonate-pyruvate transaminase inhibitor                                    |
| 0,139 | 0,051 | UDP-N-acetylglucosamine-dolichyl-phosphate N-acetylglucosaminophosphotransferase inhibitor |
| 0,096 | 0,008 | Lipocortins synthesis agonist                                                              |
| 0,151 | 0,063 | Phosphoinositide phospholipase C inhibitor                                                 |
| 0,138 | 0,051 | Fructose-2,6-bisphosphate 2-phosphatase inhibitor                                          |
| 0,121 | 0,034 | Ketohexokinase inhibitor                                                                   |
| 0,125 | 0,038 | Beta-D-fucosidase inhibitor                                                                |
| 0,177 | 0,091 | Nicotinic alpha4beta2 receptor antagonist                                                  |
| 0,130 | 0,044 | Poly(3-hydroxybutyrate) depolymerase inhibitor                                             |
| 0,117 | 0,031 | Beta-N-acetylgalactosaminidase inhibitor                                                   |
| 0,189 | 0,103 | Acyl-CoA oxidase inhibitor                                                                 |
| 0,117 | 0,031 | CYP4F substrate                                                                            |
| 0,120 | 0,035 | Proline dehydrogenase inhibitor                                                            |
| 0,115 | 0,029 | L-fuconate dehydratase inhibitor                                                           |
| 0,133 | 0,047 | Diacylglycerol kinase inhibitor                                                            |
| 0,144 | 0,059 | Allophanate hydrolase inhibitor                                                            |
| 0,132 | 0,047 | Lysozyme inhibitor                                                                         |
| 0,143 | 0,058 | Haloacetate dehalogenase inhibitor                                                         |
| 0,143 | 0,058 | Prepilin peptidase inhibitor                                                               |
| 0,152 | 0,067 | UGT2B18 substrate                                                                          |
| 0,151 | 0,066 | Alpha-Methylacyl-CoA racemase inhibitor                                                    |
| 0,107 | 0,022 | Alpha, alpha-trehalose phosphorylase (configuration-retaining) inhibitor                   |

|       |       |                                                          |
|-------|-------|----------------------------------------------------------|
| 0,154 | 0,070 | 3-Aminobutyryl-CoA ammonia-lyase inhibitor               |
| 0,116 | 0,032 | Ribonuclease U2 inhibitor                                |
| 0,121 | 0,037 | Bis(5'-adenosyl)-triphosphatase inhibitor                |
| 0,148 | 0,065 | Protein-tyrosine sulfotransferase inhibitor              |
| 0,120 | 0,037 | 2-Hydroxy-3-oxopropionate reductase inhibitor            |
| 0,144 | 0,061 | Glutathione S-transferase substrate                      |
| 0,101 | 0,018 | Chitin deacetylase inhibitor                             |
| 0,135 | 0,053 | NAD <sup>+</sup> kinase inhibitor                        |
| 0,147 | 0,065 | CYP4B substrate                                          |
| 0,155 | 0,074 | Penicillopepsin inhibitor                                |
| 0,095 | 0,013 | Prostaglandin agonist                                    |
| 0,135 | 0,054 | Poly(ADP-ribose) glycohydrolase inhibitor                |
| 0,163 | 0,082 | 6-Pyruvoyltetrahydropterin synthase inhibitor            |
| 0,159 | 0,077 | Polynucleotide 5'-hydroxy-kinase inhibitor               |
| 0,120 | 0,038 | Dichloromuconate cycloisomerase inhibitor                |
| 0,108 | 0,026 | Alpha-L-fucosidase inhibitor                             |
| 0,140 | 0,059 | Excitatory amino acid transporter EAAC1 inhibitor        |
| 0,137 | 0,055 | Mevalonate kinase inhibitor                              |
| 0,126 | 0,045 | 5 Hydroxytryptamine 4A antagonist                        |
| 0,156 | 0,076 | Phenylacetate-CoA ligase inhibitor                       |
| 0,116 | 0,035 | 3-Oxosteroid 1-dehydrogenase inhibitor                   |
| 0,149 | 0,068 | Aldehyde ferredoxin oxidoreductase inhibitor             |
| 0,109 | 0,029 | Alpha-L-rhamnosidase inhibitor                           |
| 0,181 | 0,101 | Sulfite reductase inhibitor                              |
| 0,166 | 0,086 | Penicillin amidase inhibitor                             |
| 0,156 | 0,075 | Adenylate cyclase stimulant                              |
| 0,160 | 0,079 | Antidiabetic (type 2)                                    |
| 0,163 | 0,083 | 4-Hydroxyglutamate transaminase inhibitor                |
| 0,165 | 0,084 | Picornain 3C inhibitor                                   |
| 0,173 | 0,093 | Urate-ribonucleotide phosphorylase inhibitor             |
| 0,142 | 0,062 | Galactose 1-dehydrogenase (NADP <sup>+</sup> ) inhibitor |
| 0,142 | 0,062 | Beta-alanine-pyruvate transaminase inhibitor             |
| 0,134 | 0,054 | Diacylglycerol cholinephosphotransferase inhibitor       |
| 0,145 | 0,065 | Antibacterial, ophthalmic                                |
| 0,154 | 0,074 | 2-Acylglycerol O-acyltransferase inhibitor               |
| 0,165 | 0,085 | Microtubule formation inhibitor                          |
| 0,090 | 0,010 | Aldehyde dehydrogenase 1A2 inhibitor                     |

|       |       |                                                            |
|-------|-------|------------------------------------------------------------|
| 0,200 | 0,121 | Glutaminyl-peptide cyclotransferase inhibitor              |
| 0,095 | 0,016 | NMDA receptor polyamine site agonist                       |
| 0,136 | 0,057 | ATP adenyltransferase inhibitor                            |
| 0,104 | 0,025 | 2-Dehydro-3-deoxy-phosphogluconate aldolase inhibitor      |
| 0,088 | 0,010 | Elastase 1 inhibitor                                       |
| 0,270 | 0,191 | Oxidoreductase inhibitor                                   |
| 0,141 | 0,062 | 8-Amino-7-oxononanoate synthase inhibitor                  |
| 0,136 | 0,057 | CYP26A substrate                                           |
| 0,114 | 0,035 | Gluconokinase inhibitor                                    |
| 0,141 | 0,062 | GABA A inverse agonist                                     |
| 0,141 | 0,062 | GABA inverse agonist                                       |
| 0,130 | 0,052 | NADH dehydrogenase inhibitor                               |
| 0,115 | 0,037 | Cell wall synthesis inhibitor                              |
| 0,142 | 0,064 | Thiamine-phosphate kinase inhibitor                        |
| 0,103 | 0,025 | (S)-2-Methylmalate dehydratase inhibitor                   |
| 0,150 | 0,072 | Oligopeptidase B inhibitor                                 |
| 0,122 | 0,044 | NMDA receptor polyamine site antagonist                    |
| 0,161 | 0,083 | Creatinine deaminase inhibitor                             |
| 0,157 | 0,079 | Allyl-alcohol dehydrogenase inhibitor                      |
| 0,126 | 0,048 | Heparan-alpha-glucosaminide N-acetyltransferase inhibitor  |
| 0,127 | 0,050 | Guanidinodeoxy-scylo-inositol-4-phosphatase inhibitor      |
| 0,138 | 0,061 | Biotin carboxylase inhibitor                               |
| 0,190 | 0,112 | Aromatic-hydroxylamine O-acetyltransferase inhibitor       |
| 0,141 | 0,063 | Aminocarboxymuconate-semialdehyde decarboxylase inhibitor  |
| 0,178 | 0,101 | Dihydroxy-acid dehydratase inhibitor                       |
| 0,205 | 0,128 | CYP2C10 substrate                                          |
| 0,164 | 0,087 | Acetylornithine deacetylase inhibitor                      |
| 0,125 | 0,049 | Galactoside 2-alpha-L-fucosyltransferase inhibitor         |
| 0,140 | 0,065 | Gingipain R inhibitor                                      |
| 0,112 | 0,037 | 2-Dehydro-3-deoxy-L-arabinonate dehydratase inhibitor      |
| 0,186 | 0,111 | Histidinol dehydrogenase inhibitor                         |
| 0,181 | 0,106 | Opine dehydrogenase inhibitor                              |
| 0,164 | 0,090 | Glutathione peroxidase inhibitor                           |
| 0,115 | 0,041 | Glyceraldehyde-3-phosphate dehydrogenase (NADP+) inhibitor |
| 0,203 | 0,129 | Gamma-glutamyltransferase inhibitor                        |
| 0,137 | 0,063 | CYP4B1 substrate                                           |
| 0,105 | 0,031 | Xylan 1,4-beta-xylosidase inhibitor                        |

|       |       |                                                                                  |
|-------|-------|----------------------------------------------------------------------------------|
| 0,188 | 0,114 | O-aminophenol oxidase inhibitor                                                  |
| 0,155 | 0,082 | Aspartoacylase inhibitor                                                         |
| 0,134 | 0,061 | (S)-2-hydroxy-acid oxidase inhibitor                                             |
| 0,155 | 0,083 | 4-Hydroxybenzoate nonaprenyltransferase inhibitor                                |
| 0,123 | 0,050 | Pantothenase inhibitor                                                           |
| 0,140 | 0,067 | Phenylpyruvate decarboxylase inhibitor                                           |
| 0,204 | 0,131 | Chloride channel activator                                                       |
| 0,186 | 0,114 | Ferredoxin hydrogenase inhibitor                                                 |
| 0,308 | 0,236 | Antiviral (Rhinovirus)                                                           |
| 0,107 | 0,035 | Galactosylgalactosylglucosylceramidase inhibitor                                 |
| 0,114 | 0,042 | Globoside alpha-N-acetylgalactosaminyltransferase inhibitor                      |
| 0,115 | 0,043 | Lysine decarboxylase inhibitor                                                   |
| 0,109 | 0,037 | 3-Isopropylmalate dehydrogenase inhibitor                                        |
| 0,096 | 0,024 | CYP4F12 substrate                                                                |
| 0,121 | 0,050 | Chondroitin 6-sulfotransferase inhibitor                                         |
| 0,134 | 0,062 | O-acetylhomoserine aminocarboxypropyltransferase inhibitor                       |
| 0,147 | 0,076 | Aldehyde dehydrogenase (NADP+) inhibitor                                         |
| 0,170 | 0,099 | Indoleacetaldoxime dehydratase inhibitor                                         |
| 0,131 | 0,060 | Isovaleryl-CoA dehydrogenase inhibitor                                           |
| 0,075 | 0,005 | Prostaglandin EP4 antagonist                                                     |
| 0,074 | 0,003 | Beta glucosidase inhibitor                                                       |
| 0,151 | 0,081 | Pyridoxine 4-oxidase inhibitor                                                   |
| 0,160 | 0,090 | Antineoplastic (renal cancer)                                                    |
| 0,168 | 0,099 | Thermitase inhibitor                                                             |
| 0,141 | 0,071 | 2-Oxoglutarate decarboxylase inhibitor                                           |
| 0,120 | 0,051 | Leucine transaminase inhibitor                                                   |
| 0,117 | 0,048 | Adenylylsulphatase inhibitor                                                     |
| 0,202 | 0,133 | Antiparkinsonian, rigidity relieving                                             |
| 0,132 | 0,063 | Glucan endo-1,3-alpha-glucosidase inhibitor                                      |
| 0,128 | 0,059 | Myocardial infarction treatment                                                  |
| 0,122 | 0,052 | UGT2B11 substrate                                                                |
| 0,160 | 0,091 | Glycine C-acetyltransferase inhibitor                                            |
| 0,117 | 0,048 | D-glutamate oxidase inhibitor                                                    |
| 0,102 | 0,034 | Homospermidine synthase inhibitor                                                |
| 0,097 | 0,028 | Alpha-1,6-mannosyl-glycoprotein 6-beta-N-acetylglucosaminyltransferase inhibitor |
| 0,115 | 0,046 | Phosphofructokinase-1 inhibitor                                                  |
| 0,129 | 0,061 | NAD(P)+ transhydrogenase (B-specific) inhibitor                                  |

|       |       |                                                             |
|-------|-------|-------------------------------------------------------------|
| 0,128 | 0,060 | Neuropsin inhibitor                                         |
| 0,160 | 0,092 | Stromelysin 2 inhibitor                                     |
| 0,171 | 0,104 | Sodium channel blocker class Ib                             |
| 0,158 | 0,091 | Hydroxymethylglutaryl-CoA lyase inhibitor                   |
| 0,203 | 0,135 | CYP2C11 substrate                                           |
| 0,125 | 0,058 | CYP19 inhibitor                                             |
| 0,160 | 0,092 | Arylacetonitrilase inhibitor                                |
| 0,072 | 0,005 | Antimitotic, Podophyllotoxin-like                           |
| 0,124 | 0,058 | L-lysine 6-transaminase inhibitor                           |
| 0,087 | 0,020 | 3-Alpha-hydroxysteroid dehydrogenase (B-specific) inhibitor |
| 0,219 | 0,153 | Aldehyde oxidase inhibitor                                  |
| 0,194 | 0,128 | CYP2B2 substrate                                            |
| 0,128 | 0,062 | Iduronate-2-sulfatase inhibitor                             |
| 0,124 | 0,058 | Glycoprotein 3-alpha-L-fucosyltransferase inhibitor         |
| 0,179 | 0,114 | D-amino-acid dehydrogenase inhibitor                        |
| 0,126 | 0,060 | D-2-hydroxy-acid dehydrogenase inhibitor                    |
| 0,143 | 0,078 | Restless leg syndrome treatment                             |
| 0,183 | 0,118 | Renal tissue kallikrein inhibitor                           |
| 0,179 | 0,114 | Indolepyruvate C-methyltransferase inhibitor                |
| 0,111 | 0,047 | Leucine-tRNA ligase inhibitor                               |
| 0,147 | 0,082 | Aminopeptidase Y inhibitor                                  |
| 0,127 | 0,063 | N4-(beta-N-acetylglucosaminy)-L-asparaginase inhibitor      |
| 0,104 | 0,039 | Phosphoenolpyruvate carboxykinase (diphosphate) inhibitor   |
| 0,203 | 0,139 | Calcium channel activator                                   |
| 0,205 | 0,141 | 4-Hydroxyphenylacetate 3-monooxygenase inhibitor            |
| 0,106 | 0,042 | Monocarboxylic acid transporter 1 inhibitor                 |
| 0,106 | 0,042 | Monocarboxylic acid transporter inhibitor                   |
| 0,116 | 0,052 | DNA nucleotidylexotransferase inhibitor                     |
| 0,083 | 0,020 | ATP diphosphatase inhibitor                                 |
| 0,146 | 0,083 | Plasmanylethanolamine desaturase inhibitor                  |
| 0,117 | 0,053 | Interleukin 2 antagonist                                    |
| 0,147 | 0,084 | Tryptophan transaminase inhibitor                           |
| 0,070 | 0,007 | CYP4F8 substrate                                            |
| 0,104 | 0,042 | N-acetylneuraminate lyase inhibitor                         |
| 0,137 | 0,074 | Antineoplastic (gastric cancer)                             |
| 0,077 | 0,014 | Sucrose-phosphate phosphatase inhibitor                     |
| 0,105 | 0,042 | Cysteine transaminase inhibitor                             |

|       |       |                                                       |
|-------|-------|-------------------------------------------------------|
| 0,172 | 0,110 | Ribonucleoside triphosphate reductase inhibitor       |
| 0,091 | 0,028 | CYP2A13 substrate                                     |
| 0,120 | 0,058 | Ribonuclease inhibitor                                |
| 0,115 | 0,053 | Aspartate-ammonia ligase (ADP-forming) inhibitor      |
| 0,129 | 0,068 | Pantoate 4-dehydrogenase inhibitor                    |
| 0,152 | 0,091 | N-methyl-2-oxoglutaramate hydrolase inhibitor         |
| 0,120 | 0,059 | Anabolic                                              |
| 0,120 | 0,059 | L-galactonolactone oxidase inhibitor                  |
| 0,142 | 0,081 | Ferrochelataze inhibitor                              |
| 0,093 | 0,032 | Amylo-alpha-1,6-glucosidase inhibitor                 |
| 0,103 | 0,043 | Galactosylceramide sulfotransferase inhibitor         |
| 0,122 | 0,061 | D-lactate dehydrogenase (cytochrome) inhibitor        |
| 0,295 | 0,235 | CYP2C8 inhibitor                                      |
| 0,163 | 0,103 | Antinaupathic                                         |
| 0,088 | 0,028 | Peptidoglycan beta-N-acetylmuramidase inhibitor       |
| 0,185 | 0,126 | Tankyrase inhibitor                                   |
| 0,098 | 0,039 | Malate dehydrogenase (NADP+) inhibitor                |
| 0,084 | 0,024 | Alpha-mannosidase inhibitor                           |
| 0,125 | 0,066 | Contraceptive                                         |
| 0,119 | 0,060 | CYP3C substrate                                       |
| 0,090 | 0,031 | 4a-Hydroxytetrahydrobiopterin dehydratase inhibitor   |
| 0,096 | 0,037 | Aspartate-semialdehyde dehydrogenase inhibitor        |
| 0,140 | 0,081 | Peptidylamidoglycolate lyase inhibitor                |
| 0,125 | 0,066 | Carnitine 3-dehydrogenase inhibitor                   |
| 0,148 | 0,089 | Cytochrome-b5 reductase substrate                     |
| 0,101 | 0,043 | Retinol O-fatty-acyltransferase inhibitor             |
| 0,116 | 0,057 | Alanine transaminase inhibitor                        |
| 0,101 | 0,042 | Cellobiose phosphorylase inhibitor                    |
| 0,175 | 0,117 | Glutaminase inhibitor                                 |
| 0,081 | 0,022 | 1-Alkyl-2-acetylgllycerol O-acyltransferase inhibitor |
| 0,189 | 0,131 | Acetylserotonin O-methyltransferase inhibitor         |
| 0,086 | 0,029 | Aldose 1-epimerase inhibitor                          |
| 0,136 | 0,079 | HIV-2 reverse transcriptase inhibitor                 |
| 0,089 | 0,032 | Steroid sulfotransferase inhibitor                    |
| 0,118 | 0,061 | Aldehyde dehydrogenase [NAD(P)+] inhibitor            |
| 0,112 | 0,055 | Aspartate transaminase inhibitor                      |
| 0,147 | 0,090 | Benzoylformate decarboxylase inhibitor                |

|       |       |                                                                   |
|-------|-------|-------------------------------------------------------------------|
| 0,097 | 0,040 | Ribulose-bisphosphate carboxylase inhibitor                       |
| 0,116 | 0,059 | Cholate-CoA ligase inhibitor                                      |
| 0,092 | 0,035 | 3-Oxoacyl-[acyl-carrier-protein] synthase inhibitor               |
| 0,293 | 0,236 | Acute neurologic disorders treatment                              |
| 0,118 | 0,062 | Aspartate kinase inhibitor                                        |
| 0,115 | 0,059 | Pyrimidine-deoxynucleoside 2'-dioxygenase inhibitor               |
| 0,103 | 0,046 | UDP-N-acetylglucosamine diphosphorylase inhibitor                 |
| 0,102 | 0,046 | 5-Oxoprolinase (ATP-hydrolysing) inhibitor                        |
| 0,155 | 0,099 | 3-Demethylubiquinone-9 3-O-methyltransferase inhibitor            |
| 0,101 | 0,045 | 3-Deoxy-8-phosphooctulonate synthase inhibitor                    |
| 0,146 | 0,090 | Acetate kinase inhibitor                                          |
| 0,276 | 0,220 | Fibrinolytic                                                      |
| 0,110 | 0,054 | UDP-glucose 4-epimerase inhibitor                                 |
| 0,086 | 0,031 | Hydroperoxide dehydratase inhibitor                               |
| 0,130 | 0,075 | Ethanolaminephosphotransferase inhibitor                          |
| 0,088 | 0,033 | Aspartate 1-decarboxylase inhibitor                               |
| 0,145 | 0,090 | Potassium channel intermediate-conductance Ca-activated activator |
| 0,145 | 0,090 | K(Ca) 3.1 channel activator                                       |
| 0,137 | 0,083 | Heat shock protein agonist                                        |
| 0,096 | 0,042 | L-lysine oxidase inhibitor                                        |
| 0,071 | 0,017 | Biotin-[methylmalonyl-CoA-carboxytransferase] ligase inhibitor    |
| 0,095 | 0,041 | Necroptosis inhibitor                                             |
| 0,121 | 0,067 | Sulfate adenylyltransferase (ADP) inhibitor                       |
| 0,087 | 0,033 | Lactate-malate transhydrogenase inhibitor                         |
| 0,105 | 0,051 | Inositol-polyphosphate 5-phosphatase inhibitor                    |
| 0,125 | 0,071 | Cathepsin H inhibitor                                             |
| 0,086 | 0,033 | 3-Dehydroquinase synthase inhibitor                               |
| 0,123 | 0,070 | Adenylate cyclase inhibitor                                       |
| 0,090 | 0,037 | Polyamine biosynthesis inhibitor                                  |
| 0,086 | 0,033 | mRNA (guanine-N7-)-methyltransferase inhibitor                    |
| 0,122 | 0,069 | Glycogen (starch) synthase inhibitor                              |
| 0,073 | 0,021 | Glucan 1,4-alpha-glucosidase inhibitor                            |
| 0,208 | 0,156 | 3C-like protease (Human coronavirus) inhibitor                    |
| 0,106 | 0,054 | Tyrosine-protein kinase TYRO 10 inhibitor                         |
| 0,054 | 0,002 | Prostaglandin EP12 antagonist                                     |
| 0,094 | 0,042 | (R)-aminopropanol dehydrogenase inhibitor                         |
| 0,090 | 0,039 | Epoxide hydrolase substrate                                       |

|       |       |                                                                               |
|-------|-------|-------------------------------------------------------------------------------|
| 0,223 | 0,172 | Nicotinate dehydrogenase inhibitor                                            |
| 0,088 | 0,038 | Glutaminyl-tRNA synthase (glutamine-hydrolysing) inhibitor                    |
| 0,133 | 0,082 | Quinoline-4-carboxylate 2-oxidoreductase inhibitor                            |
| 0,085 | 0,035 | CYP2C2 substrate                                                              |
| 0,070 | 0,020 | Amylosucrase inhibitor                                                        |
| 0,201 | 0,151 | Choline-phosphate cytidyltransferase inhibitor                                |
| 0,116 | 0,067 | Cysteine desulfurase inhibitor                                                |
| 0,106 | 0,056 | tRNA (cytosine-5-)-methyltransferase inhibitor                                |
| 0,143 | 0,094 | Hydroxymethylbilane synthase inhibitor                                        |
| 0,224 | 0,174 | Antithrombotic                                                                |
| 0,207 | 0,158 | Farnesoid X receptor antagonist                                               |
| 0,074 | 0,024 | CYP24 inhibitor                                                               |
| 0,100 | 0,050 | D-proline reductase (dithiol) inhibitor                                       |
| 0,174 | 0,124 | Thiol oxidase inhibitor                                                       |
| 0,068 | 0,019 | Prostaglandin-I synthase inhibitor                                            |
| 0,108 | 0,060 | Allantoicase inhibitor                                                        |
| 0,112 | 0,064 | Glycerol-3-phosphate O-acyltransferase inhibitor                              |
| 0,075 | 0,026 | Corticotropin releasing factor antagonist                                     |
| 0,094 | 0,045 | Phenylalanine-tRNA ligase inhibitor                                           |
| 0,096 | 0,047 | Squalene-hopene cyclase inhibitor                                             |
| 0,266 | 0,217 | Intermittent claudication treatment                                           |
| 0,091 | 0,043 | 2-Methylcitrate synthase inhibitor                                            |
| 0,109 | 0,061 | DNA-3-methyladenine glycosylase II inhibitor                                  |
| 0,098 | 0,050 | Deoxyribonuclease (pyrimidine dimer) inhibitor                                |
| 0,127 | 0,079 | Sulfur dioxygenase inhibitor                                                  |
| 0,058 | 0,010 | Sucrose phosphorylase inhibitor                                               |
| 0,102 | 0,054 | Mannonate dehydratase inhibitor                                               |
| 0,151 | 0,103 | Threonine aldolase inhibitor                                                  |
| 0,095 | 0,047 | Saccharopine dehydrogenase (NAD <sup>+</sup> , L-glutamate-forming) inhibitor |
| 0,070 | 0,022 | UGT2B19 substrate                                                             |
| 0,070 | 0,022 | UGT2B30 substrate                                                             |
| 0,070 | 0,022 | UGT2B4E substrate                                                             |
| 0,070 | 0,022 | UGT2B4D substrate                                                             |
| 0,070 | 0,022 | UGT2B23 substrate                                                             |
| 0,134 | 0,086 | (R,R)-butanediol dehydrogenase inhibitor                                      |
| 0,088 | 0,040 | Estrogen agonist                                                              |
| 0,092 | 0,045 | [hydroxymethylglutaryl-CoA reductase (NADPH)] kinase inhibitor                |

|       |       |                                                                                       |
|-------|-------|---------------------------------------------------------------------------------------|
| 0,208 | 0,160 | FMO1 substrate                                                                        |
| 0,084 | 0,037 | Glycerol kinase inhibitor                                                             |
| 0,078 | 0,032 | [acetyl-CoA carboxylase] kinase inhibitor                                             |
| 0,070 | 0,023 | Glucan 1,3-alpha-glucosidase inhibitor                                                |
| 0,052 | 0,005 | Glucocorticoid agonist                                                                |
| 0,191 | 0,144 | Trimethylamine dehydrogenase inhibitor                                                |
| 0,171 | 0,124 | Pitrilysin inhibitor                                                                  |
| 0,288 | 0,242 | Diabetic neuropathy treatment                                                         |
| 0,135 | 0,089 | N-Acyl-D-amino-acid deacylase inhibitor                                               |
| 0,185 | 0,139 | L-threonine 3-dehydrogenase inhibitor                                                 |
| 0,084 | 0,038 | Beta-glucosidase inhibitor                                                            |
| 0,115 | 0,069 | Glutamate release inhibitor                                                           |
| 0,137 | 0,091 | 3,4-Dihydroxy-9,10-secoandrosta-1,3,5(10)-triene-9,17-dione 4,5-dioxygenase inhibitor |
| 0,084 | 0,038 | 4-Hydroxy-4-methyl-2-oxoglutarate aldolase inhibitor                                  |
| 0,064 | 0,018 | D(-)-tartrate dehydratase inhibitor                                                   |
| 0,086 | 0,041 | Glycerophosphocholine phosphodiesterase inhibitor                                     |
| 0,126 | 0,081 | Homogentisate 1,2-dioxygenase inhibitor                                               |
| 0,227 | 0,182 | Beta glucuronidase inhibitor                                                          |
| 0,082 | 0,037 | 3(or 17)alpha-hydroxysteroid dehydrogenase inhibitor                                  |
| 0,089 | 0,044 | Deoxycytidine kinase inhibitor                                                        |
| 0,080 | 0,035 | Lactaldehyde dehydrogenase inhibitor                                                  |
| 0,238 | 0,193 | CYP3A5 substrate                                                                      |
| 0,211 | 0,166 | Antiprotozoal (Coccidial)                                                             |
| 0,143 | 0,099 | Tyrosine kinase stimulant                                                             |
| 0,072 | 0,029 | Acidifying agent gastric                                                              |
| 0,080 | 0,037 | ACK1 kinase inhibitor                                                                 |
| 0,127 | 0,084 | Cysteine synthase inhibitor                                                           |
| 0,137 | 0,094 | Pyruvate carboxylase inhibitor                                                        |
| 0,136 | 0,093 | (S)-3-hydroxyacid ester dehydrogenase inhibitor                                       |
| 0,150 | 0,107 | Atrolisin A inhibitor                                                                 |
| 0,129 | 0,086 | Candidapepsin inhibitor                                                               |
| 0,090 | 0,047 | 2-Oxoaldehyde dehydrogenase (NAD+) inhibitor                                          |
| 0,084 | 0,041 | ATP deaminase inhibitor                                                               |
| 0,092 | 0,049 | Scyllo-inosamine-4-phosphate amidinotransferase inhibitor                             |
| 0,102 | 0,060 | Dihydrouracil oxidase inhibitor                                                       |
| 0,110 | 0,068 | Glucose 1-dehydrogenase inhibitor                                                     |
| 0,101 | 0,060 | Triose-phosphate isomerase inhibitor                                                  |

|       |       |                                                                  |
|-------|-------|------------------------------------------------------------------|
| 0,085 | 0,044 | Cyanate hydratase inhibitor                                      |
| 0,088 | 0,047 | D-alanine transaminase inhibitor                                 |
| 0,180 | 0,138 | Endopeptidase La inhibitor                                       |
| 0,067 | 0,025 | 3'(2'),5'-Bisphosphate nucleotidase inhibitor                    |
| 0,151 | 0,110 | Cyclopentanone monooxygenase inhibitor                           |
| 0,103 | 0,062 | Phosphatidate cytidyltransferase inhibitor                       |
| 0,124 | 0,083 | Endoglycosylceramidase inhibitor                                 |
| 0,073 | 0,032 | 3-Methyl-2-oxobutanoate dehydrogenase (lipoamide) inhibitor      |
| 0,105 | 0,064 | Glutamate N-acetyltransferase inhibitor                          |
| 0,158 | 0,117 | Gastrointestinal motility stimulant                              |
| 0,093 | 0,053 | UDP-N-acetylglucosamine 2-epimerase inhibitor                    |
| 0,106 | 0,065 | Site-specific DNA-methyltransferase (adenine-specific) inhibitor |
| 0,070 | 0,030 | Mannosidase inhibitor                                            |
| 0,068 | 0,028 | D-Serine ammonia-lyase inhibitor                                 |
| 0,055 | 0,015 | Tartrate decarboxylase inhibitor                                 |
| 0,154 | 0,114 | CTGF expression inhibitor                                        |
| 0,144 | 0,105 | UGT2B7 substrate                                                 |
| 0,086 | 0,046 | Alpha,alpha-trehalose-phosphate synthase (UDP-forming) inhibitor |
| 0,069 | 0,030 | Carbamoyl-serine ammonia-lyase inhibitor                         |
| 0,101 | 0,062 | Ribitol 2-dehydrogenase inhibitor                                |
| 0,105 | 0,067 | Adenosylmethionine-8-amino-7-oxononanoate transaminase inhibitor |
| 0,098 | 0,059 | Thiamine-phosphate diphosphorylase inhibitor                     |
| 0,097 | 0,058 | Glycerol dehydratase inhibitor                                   |
| 0,096 | 0,057 | Benzaldehyde dehydrogenase (NAD+) inhibitor                      |
| 0,054 | 0,015 | Dichloromethane dehalogenase inhibitor                           |
| 0,090 | 0,051 | CYP26 substrate                                                  |
| 0,094 | 0,056 | Acetoacetate decarboxylase inhibitor                             |
| 0,061 | 0,023 | Na+ K+ transporting ATPase inhibitor                             |
| 0,099 | 0,061 | Cytosole dipeptidase inhibitor                                   |
| 0,120 | 0,082 | Choline acetyltransferase stimulant                              |
| 0,081 | 0,043 | 6-Phosphofructo-2-kinase inhibitor                               |
| 0,128 | 0,090 | Tryptophanyl aminopeptidase inhibitor                            |
| 0,142 | 0,104 | 4-Chlorophenylacetate 3,4-dioxygenase inhibitor                  |
| 0,168 | 0,130 | Diamine N-acetyltransferase inhibitor                            |
| 0,126 | 0,088 | 3-Hydroxyphenylacetate 6-hydroxylase inhibitor                   |
| 0,122 | 0,084 | Acylglycerone-phosphate reductase inhibitor                      |
| 0,132 | 0,095 | Glutamate synthase (ferredoxin) inhibitor                        |

|       |       |                                                                                             |
|-------|-------|---------------------------------------------------------------------------------------------|
| 0,061 | 0,023 | CYP17 substrate                                                                             |
| 0,119 | 0,082 | Xaa-Pro dipeptidyl-peptidase inhibitor                                                      |
| 0,096 | 0,059 | Glycine transaminase inhibitor                                                              |
| 0,074 | 0,037 | Glutathione reductase (NADPH) stimulant                                                     |
| 0,074 | 0,037 | Glutathione reductase stimulant                                                             |
| 0,121 | 0,084 | Galactoside O-acetyltransferase inhibitor                                                   |
| 0,105 | 0,069 | Squalene epoxidase inhibitor                                                                |
| 0,119 | 0,084 | Arylalkyl acylamidase inhibitor                                                             |
| 0,107 | 0,071 | Aspartyl aminopeptidase inhibitor                                                           |
| 0,150 | 0,114 | Ferredoxin-nitrite reductase inhibitor                                                      |
| 0,103 | 0,068 | Malyl-CoA lyase inhibitor                                                                   |
| 0,100 | 0,065 | Glycerol-3-phosphate dehydrogenase (NAD+) inhibitor                                         |
| 0,101 | 0,065 | Glycoprotein-fucosylgalactoside alpha-N-acetylgalactosaminyltransferase inhibitor           |
| 0,110 | 0,075 | Venombin A inhibitor                                                                        |
| 0,065 | 0,030 | Hydroxylysine kinase inhibitor                                                              |
| 0,173 | 0,138 | Hydroxylamine reductase inhibitor                                                           |
| 0,096 | 0,062 | Alpha,alpha-trehalase inhibitor                                                             |
| 0,081 | 0,046 | Phosphoribulokinase inhibitor                                                               |
| 0,061 | 0,026 | CYP24 substrate                                                                             |
| 0,257 | 0,223 | Mannotetraose 2-alpha-N-acetylglucosaminyltransferase inhibitor                             |
| 0,061 | 0,027 | Propionate CoA-transferase inhibitor                                                        |
| 0,074 | 0,040 | UGT2B7H substrate                                                                           |
| 0,074 | 0,040 | UGT2B7Y substrate                                                                           |
| 0,073 | 0,039 | Dextranucrase inhibitor                                                                     |
| 0,073 | 0,039 | Deoxyhypusine synthase inhibitor                                                            |
| 0,079 | 0,045 | 3-Dehydroquinate dehydratase inhibitor                                                      |
| 0,097 | 0,064 | CMP-N-acetylneuraminate monooxygenase inhibitor                                             |
| 0,128 | 0,095 | Adenylate kinase inhibitor                                                                  |
| 0,077 | 0,044 | N-acetylglucosaminyldiphosphoundecaprenol N-acetyl-beta-D-mannosaminyltransferase inhibitor |
| 0,087 | 0,054 | Guanidinopropionase inhibitor                                                               |
| 0,118 | 0,085 | Acid-sensing ion channel blocker                                                            |
| 0,066 | 0,034 | Beta galactosidase inhibitor                                                                |
| 0,078 | 0,045 | Dihydrolipoamide S-acetyltransferase inhibitor                                              |
| 0,063 | 0,031 | CMP-KDO synthase inhibitor                                                                  |
| 0,116 | 0,084 | Creatine kinase inhibitor                                                                   |
| 0,062 | 0,030 | Biotin-[propionyl-CoA-carboxylase (ATP-hydrolysing)] ligase inhibitor                       |
| 0,097 | 0,065 | Malate dehydrogenase (oxaloacetate-decarboxylating) inhibitor                               |

|       |       |                                                                                  |
|-------|-------|----------------------------------------------------------------------------------|
| 0,210 | 0,178 | Pyroglutamyl-peptidase II inhibitor                                              |
| 0,081 | 0,050 | S-methyl-5-thioribose kinase inhibitor                                           |
| 0,132 | 0,101 | TH expression enhancer                                                           |
| 0,106 | 0,075 | Adenylate cyclase V inhibitor                                                    |
| 0,125 | 0,094 | Procollagen C-endopeptidase inhibitor                                            |
| 0,119 | 0,088 | Cancer procoagulant inhibitor                                                    |
| 0,102 | 0,071 | Cerevisin inhibitor                                                              |
| 0,203 | 0,172 | CYP4A substrate                                                                  |
| 0,135 | 0,104 | Acetylspermidine deacetylase inhibitor                                           |
| 0,133 | 0,103 | Tryptophan alpha,beta-oxidase inhibitor                                          |
| 0,062 | 0,031 | Glycine N-choloyltransferase inhibitor                                           |
| 0,075 | 0,044 | L-aminoadipate-semialdehyde dehydrogenase inhibitor                              |
| 0,164 | 0,134 | Thiopurine S-methyltransferase inhibitor                                         |
| 0,109 | 0,079 | Glucosamine-6-phosphate deaminase inhibitor                                      |
| 0,105 | 0,074 | Decylcitrate synthase inhibitor                                                  |
| 0,071 | 0,041 | Alpha 3 adrenoreceptor agonist                                                   |
| 0,034 | 0,004 | 3-Oxoacyl-[acyl-carrier-protein] synthase II inhibitor                           |
| 0,069 | 0,039 | UDP-glucose 6-dehydrogenase inhibitor                                            |
| 0,065 | 0,035 | Alpha-1,6-mannosyl-glycoprotein 2-beta-N-acetylglucosaminyltransferase inhibitor |
| 0,054 | 0,025 | Anhydrotetracycline monooxygenase inhibitor                                      |
| 0,063 | 0,033 | Deoxyadenosine kinase inhibitor                                                  |
| 0,079 | 0,050 | N-acetylglucosamine-6-phosphate deacetylase inhibitor                            |
| 0,100 | 0,070 | D-Ornithine 4,5-aminomutase inhibitor                                            |
| 0,128 | 0,099 | Lombricine kinase inhibitor                                                      |
| 0,101 | 0,071 | Diiodophenylpyruvate reductase inhibitor                                         |
| 0,136 | 0,107 | Tryptophan dimethylallyltransferase inhibitor                                    |
| 0,132 | 0,102 | Gametolysin inhibitor                                                            |
| 0,167 | 0,138 | CYP1A2 inducer                                                                   |
| 0,078 | 0,049 | Carbamoyl-phosphate synthase (ammonia) inhibitor                                 |
| 0,081 | 0,052 | Serine-glyoxylate transaminase inhibitor                                         |
| 0,082 | 0,054 | Neolactotetraosylceramide alpha-2,3-sialyltransferase inhibitor                  |
| 0,127 | 0,098 | Peptide-tryptophan 2,3-dioxygenase inhibitor                                     |
| 0,113 | 0,085 | Aryl-alcohol dehydrogenase inhibitor                                             |
| 0,114 | 0,086 | 3-Isopropylmalate dehydratase inhibitor                                          |
| 0,158 | 0,130 | Mucolytic                                                                        |
| 0,073 | 0,045 | Glutamate (mGluR8) agonist                                                       |
| 0,042 | 0,014 | Homoisocitrate dehydrogenase inhibitor                                           |

|       |       |                                                            |
|-------|-------|------------------------------------------------------------|
| 0,082 | 0,054 | Oligo-1,6-glucosidase inhibitor                            |
| 0,089 | 0,061 | CTP synthase inhibitor                                     |
| 0,103 | 0,075 | D-cysteine desulfhydrase inhibitor                         |
| 0,091 | 0,062 | Astringent                                                 |
| 0,067 | 0,039 | Methylthioadenosine nucleosidase inhibitor                 |
| 0,049 | 0,021 | Orotidylate decarboxylase inhibitor                        |
| 0,103 | 0,075 | Glucosamine-1-phosphate N-acetyltransferase inhibitor      |
| 0,074 | 0,047 | Serine-tRNA ligase inhibitor                               |
| 0,161 | 0,134 | Corticosteroid side-chain-isomerase inhibitor              |
| 0,088 | 0,060 | D-malate dehydrogenase (decarboxylating) inhibitor         |
| 0,044 | 0,016 | Thymidine phosphorylase inhibitor                          |
| 0,066 | 0,039 | Quinate 5-dehydrogenase inhibitor                          |
| 0,112 | 0,085 | Pyruvate dehydrogenase inhibitor                           |
| 0,060 | 0,032 | Glutamate (mGluR1) agonist                                 |
| 0,040 | 0,013 | Uridine phosphorylase inhibitor                            |
| 0,082 | 0,056 | Succinate-hydroxymethylglutarate CoA-transferase inhibitor |
| 0,040 | 0,014 | Transaldolase inhibitor                                    |
| 0,070 | 0,043 | Formimidoylglutamase inhibitor                             |
| 0,066 | 0,039 | Thioether S-methyltransferase inhibitor                    |
| 0,168 | 0,142 | N-methylhydantoinase (ATP-hydrolysing) inhibitor           |
| 0,109 | 0,083 | Phenylacetaldehyde dehydrogenase inhibitor                 |
| 0,079 | 0,053 | Argininosuccinate lyase inhibitor                          |
| 0,066 | 0,040 | Phosphoglucomutase inhibitor                               |
| 0,112 | 0,086 | Acylphosphatase inhibitor                                  |
| 0,119 | 0,093 | Succinic dehydrogenase inhibitor                           |
| 0,065 | 0,039 | Oxaloacetate tautomerase inhibitor                         |
| 0,093 | 0,067 | Formaldehyde dehydrogenase inhibitor                       |
| 0,053 | 0,027 | CYP3A11 substrate                                          |
| 0,048 | 0,022 | Androst-4-ene-3,17-dione monooxygenase inhibitor           |
| 0,236 | 0,211 | Antiinflammatory, ophthalmic                               |
| 0,166 | 0,141 | Diuretic                                                   |
| 0,140 | 0,114 | Choline kinase inhibitor                                   |
| 0,071 | 0,046 | Isocitrate dehydrogenase (NADP+) inhibitor                 |
| 0,075 | 0,050 | Maleate hydratase inhibitor                                |
| 0,098 | 0,073 | Sarcosine oxidase inhibitor                                |
| 0,145 | 0,120 | Laxative                                                   |
| 0,050 | 0,025 | NADPH oxidoreductase inhibitor                             |

|       |       |                                                   |
|-------|-------|---------------------------------------------------|
| 0,136 | 0,112 | Antimutagenic                                     |
| 0,102 | 0,078 | Carboxylesterase inhibitor                        |
| 0,114 | 0,089 | Lanosterol 14 alpha demethylase inhibitor         |
| 0,115 | 0,090 | Polyamine oxidase inhibitor                       |
| 0,084 | 0,059 | CMP-N-acylneuraminate phosphodiesterase inhibitor |
| 0,088 | 0,063 | Neuropeptide FF agonist                           |
| 0,088 | 0,063 | Neuropeptide FF2 agonist                          |
| 0,099 | 0,075 | Aspartate racemase inhibitor                      |
| 0,192 | 0,168 | CYP2C18 substrate                                 |
| 0,141 | 0,117 | Contraceptive female                              |
| 0,081 | 0,057 | Muconate cycloisomerase inhibitor                 |
| 0,097 | 0,074 | 2-Nitrophenol 2-monooxygenase inhibitor           |
| 0,071 | 0,048 | Carnitine O-octanoyltransferase inhibitor         |
| 0,104 | 0,081 | Acetolactate decarboxylase inhibitor              |
| 0,217 | 0,195 | Antiprotozoal (Amoeba)                            |
| 0,083 | 0,061 | Diguanidinobutanase inhibitor                     |
| 0,122 | 0,099 | Shikimate 5-dehydrogenase inhibitor               |
| 0,210 | 0,188 | CYP17 inhibitor                                   |
| 0,179 | 0,156 | Saluretic                                         |
| 0,102 | 0,080 | Dethiobiotin synthase inhibitor                   |
| 0,115 | 0,092 | FMN reductase inhibitor                           |
| 0,068 | 0,046 | L-lactate dehydrogenase (cytochrome) inhibitor    |
| 0,080 | 0,058 | tRNA (guanine-N2-)-methyltransferase inhibitor    |
| 0,108 | 0,087 | Skin whitener                                     |
| 0,192 | 0,171 | Antimetastatic                                    |
| 0,103 | 0,082 | Coagulant                                         |
| 0,120 | 0,099 | Liver X receptor antagonist                       |
| 0,101 | 0,080 | Serine-phosphoethanolamine synthase inhibitor     |
| 0,079 | 0,058 | SULT2A1 substrate                                 |
| 0,092 | 0,072 | Aminoacylase inhibitor                            |
| 0,089 | 0,069 | Orotate reductase (NADPH) inhibitor               |
| 0,185 | 0,165 | Monodehydroascorbate reductase (NADH) inhibitor   |
| 0,115 | 0,095 | Beta-cyclopiazonate dehydrogenase inhibitor       |
| 0,064 | 0,044 | GMP synthase inhibitor                            |
| 0,107 | 0,086 | Narcotic antagonist                               |
| 0,109 | 0,089 | Thiol S-methyltransferase inhibitor               |
| 0,171 | 0,150 | TRPA1 agonist                                     |

|       |       |                                                                                 |
|-------|-------|---------------------------------------------------------------------------------|
| 0,128 | 0,108 | Glycerol dehydrogenase (NADP+) inhibitor                                        |
| 0,130 | 0,110 | Phosphatidate phosphatase inhibitor                                             |
| 0,086 | 0,067 | Capillary fragility treatment                                                   |
| 0,079 | 0,059 | Cystathionine beta-lyase inhibitor                                              |
| 0,050 | 0,030 | Carboxy-cis,cis-muconate cyclase inhibitor                                      |
| 0,049 | 0,029 | N-acetylglucosaminyldiphosphodolichol N-acetylglucosaminyltransferase inhibitor |
| 0,153 | 0,133 | Fibromyalgia syndrome treatment                                                 |
| 0,025 | 0,006 | Calcineurin inhibitor                                                           |
| 0,183 | 0,164 | Antineoplastic (brain cancer)                                                   |
| 0,096 | 0,077 | Aryl-aldehyde dehydrogenase (NADP+) inhibitor                                   |
| 0,039 | 0,020 | Membrane-oligosaccharide glycerophosphotransferase inhibitor                    |
| 0,106 | 0,087 | Beta lactamase inhibitor                                                        |
| 0,093 | 0,074 | Glutamate (mGluR6) antagonist                                                   |
| 0,084 | 0,066 | Diaminopropionate ammonia-lyase inhibitor                                       |
| 0,131 | 0,113 | Quisqualate antagonist                                                          |
| 0,041 | 0,023 | Phosphoglycerate phosphatase inhibitor                                          |
| 0,077 | 0,059 | [myelin basic protein]-arginine N-methyltransferase inhibitor                   |
| 0,063 | 0,045 | Beta-1,4-mannosyl-glycoprotein 4-beta-N-acetylglucosaminyltransferase inhibitor |
| 0,073 | 0,055 | Aminolevulinate transaminase inhibitor                                          |
| 0,058 | 0,040 | Plus-end-directed kinesin ATPase inhibitor                                      |
| 0,076 | 0,059 | Cushing's syndrome treatment                                                    |
| 0,045 | 0,028 | Thymidine-triphosphatase inhibitor                                              |
| 0,077 | 0,060 | Anticholelithogenic                                                             |
| 0,092 | 0,075 | Ornithine-oxo-acid transaminase inhibitor                                       |
| 0,024 | 0,008 | Gestagen-like                                                                   |
| 0,118 | 0,102 | Tardive dyskinesia treatment                                                    |
| 0,096 | 0,080 | Lysyl endopeptidase inhibitor                                                   |
| 0,097 | 0,081 | Adenine deaminase inhibitor                                                     |
| 0,115 | 0,099 | Acetyl-CoA C-acyltransferase inhibitor                                          |
| 0,176 | 0,160 | Antiprotozoal (Trichomonas)                                                     |
| 0,050 | 0,034 | Glutamate uptake inhibitor                                                      |
| 0,122 | 0,106 | Corticosteroid antagonist                                                       |
| 0,070 | 0,054 | Propanediol dehydratase inhibitor                                               |
| 0,119 | 0,103 | Guanidinoacetate N-methyltransferase inhibitor                                  |
| 0,082 | 0,067 | Nucleotide diphosphatase inhibitor                                              |
| 0,061 | 0,045 | Malate synthase inhibitor                                                       |
| 0,160 | 0,145 | Severe acute respiratory syndrome treatment                                     |

|       |       |                                                   |
|-------|-------|---------------------------------------------------|
| 0,042 | 0,026 | Adenylate cyclase I inhibitor                     |
| 0,104 | 0,089 | Malate-CoA ligase inhibitor                       |
| 0,037 | 0,022 | Glucose-6-phosphate isomerase inhibitor           |
| 0,104 | 0,090 | Lysine 2-monooxygenase inhibitor                  |
| 0,169 | 0,155 | Dactylisin inhibitor                              |
| 0,225 | 0,211 | Cancer associated disorders treatment             |
| 0,101 | 0,087 | Adenylyl-sulfate kinase inhibitor                 |
| 0,105 | 0,091 | Heat shock protein 70 agonist                     |
| 0,030 | 0,016 | Alpha glucosidase I inhibitor                     |
| 0,126 | 0,112 | Tryptophanamidase inhibitor                       |
| 0,038 | 0,024 | Endo-beta-N-acetylglucosaminidase inhibitor       |
| 0,107 | 0,094 | Inositol 1,4,5-trisphosphate 3-kinase inhibitor   |
| 0,103 | 0,089 | Cysteine-S-conjugate beta-lyase inhibitor         |
| 0,114 | 0,101 | Isoquinoline 1-oxidoreductase inhibitor           |
| 0,117 | 0,104 | UGT2B15 substrate                                 |
| 0,080 | 0,066 | Haloalkane dehalogenase inhibitor                 |
| 0,172 | 0,159 | 5 Hydroxytryptamine 2B agonist                    |
| 0,044 | 0,031 | Glutamate (mGluR group II) agonist                |
| 0,137 | 0,124 | Aryl hydrocarbon receptor agonist                 |
| 0,076 | 0,064 | Carboxylate reductase inhibitor                   |
| 0,061 | 0,048 | Hydroxyquinol 1,2-dioxygenase inhibitor           |
| 0,100 | 0,087 | Arginine deiminase inhibitor                      |
| 0,059 | 0,047 | Asparagine-oxo-acid transaminase inhibitor        |
| 0,178 | 0,165 | Antitoxic                                         |
| 0,042 | 0,030 | Glutamate (mGluR2) agonist                        |
| 0,043 | 0,031 | 2-Ethylmalate synthase inhibitor                  |
| 0,119 | 0,107 | Phenol 2-monooxygenase inhibitor                  |
| 0,030 | 0,018 | Phosphopyruvate hydratase inhibitor               |
| 0,094 | 0,082 | Sulfate adenylyltransferase inhibitor             |
| 0,066 | 0,054 | Cellulose synthase (UDP-forming) inhibitor        |
| 0,086 | 0,074 | Agaritine gamma-glutamyltransferase inhibitor     |
| 0,078 | 0,067 | Threonine ammonia-lyase inhibitor                 |
| 0,092 | 0,081 | Putrescine oxidase inhibitor                      |
| 0,053 | 0,042 | Sucrose alpha-glucosidase inhibitor               |
| 0,064 | 0,053 | Nicotinic receptor alpha7 subunit antagonist      |
| 0,094 | 0,083 | Xanthommatin reductase inhibitor                  |
| 0,038 | 0,027 | Isopentenyl-diphosphate DELTA-isomerase inhibitor |

|       |       |                                                             |
|-------|-------|-------------------------------------------------------------|
| 0,048 | 0,037 | Nucleoside deoxyribosyltransferase inhibitor                |
| 0,041 | 0,030 | Methylaspartate mutase inhibitor                            |
| 0,050 | 0,039 | Aspartate ammonia-lyase inhibitor                           |
| 0,122 | 0,112 | Tripeptidyl-peptidase I inhibitor                           |
| 0,116 | 0,105 | Dolichyl-phosphate beta-D-mannosyltransferase inhibitor     |
| 0,126 | 0,116 | Oxalate oxidase inhibitor                                   |
| 0,131 | 0,121 | Arylamine N-acetyltransferase inhibitor                     |
| 0,087 | 0,077 | Isocitrate dehydrogenase (NAD+) inhibitor                   |
| 0,126 | 0,116 | Nucleoside-diphosphatase inhibitor                          |
| 0,150 | 0,139 | Histone acetyltransferase inhibitor                         |
| 0,038 | 0,027 | Glucosylceramidase inhibitor                                |
| 0,163 | 0,153 | 1-Alkylglycerophosphocholine O-acetyltransferase inhibitor  |
| 0,205 | 0,195 | Immunosuppressant                                           |
| 0,055 | 0,045 | 1-Phosphofructokinase inhibitor                             |
| 0,053 | 0,043 | Assemblin inhibitor                                         |
| 0,052 | 0,043 | Protein N-acetylglucosaminyltransferase inhibitor           |
| 0,083 | 0,073 | Acyloxyacyl hydrolase inhibitor                             |
| 0,066 | 0,057 | Sphingosine kinase inhibitor                                |
| 0,018 | 0,009 | Antiprotozoal activity enhancer                             |
| 0,074 | 0,065 | Isocitrate lyase inhibitor                                  |
| 0,075 | 0,066 | [acyl-carrier-protein] S-malonyltransferase inhibitor       |
| 0,078 | 0,069 | UDP-N-acetylglucosamine 1-carboxyvinyltransferase inhibitor |
| 0,056 | 0,047 | Altronate dehydratase inhibitor                             |
| 0,138 | 0,129 | CYP1B substrate                                             |
| 0,048 | 0,040 | Tubulin GTPase inhibitor                                    |
| 0,080 | 0,072 | Interleukin 1a antagonist                                   |
| 0,064 | 0,056 | Betaine-aldehyde dehydrogenase inhibitor                    |
| 0,043 | 0,035 | Glucose-1-phosphate adenyltransferase inhibitor             |
| 0,118 | 0,110 | Bacterial efflux pump inhibitor                             |
| 0,088 | 0,080 | Phosphoserine phosphatase inhibitor                         |
| 0,016 | 0,008 | Kanamycin kinase inhibitor                                  |
| 0,072 | 0,064 | Scytalone dehydratase inhibitor                             |
| 0,049 | 0,041 | D-Alanine-poly(phosphoribitol) ligase inhibitor             |
| 0,042 | 0,034 | Fructose 5-dehydrogenase (NADP+) inhibitor                  |
| 0,026 | 0,018 | Tartrate dehydrogenase inhibitor                            |
| 0,095 | 0,087 | Pyridoxine 5-dehydrogenase inhibitor                        |
| 0,039 | 0,032 | Glucose-1-phosphatase inhibitor                             |

|       |       |                                                                   |
|-------|-------|-------------------------------------------------------------------|
| 0,025 | 0,017 | Corticosteroid-like                                               |
| 0,108 | 0,101 | Saccharopine dehydrogenase (NADP+, L-glutamate-forming) inhibitor |
| 0,022 | 0,015 | Cortisone alpha-reductase inhibitor                               |
| 0,090 | 0,083 | Glutamine-tRNA ligase inhibitor                                   |
| 0,047 | 0,040 | AMP nucleosidase inhibitor                                        |
| 0,179 | 0,172 | Phospholipase C inhibitor                                         |
| 0,070 | 0,063 | 4-Pyridoxolactonase inhibitor                                     |
| 0,149 | 0,142 | Beta-carotene 15,15'-monooxygenase inhibitor                      |
| 0,068 | 0,061 | 1-Pyrroline-5-carboxylate dehydrogenase inhibitor                 |
| 0,050 | 0,043 | Chalcone isomerase inhibitor                                      |
| 0,106 | 0,100 | Cholesterol synthesis inhibitor                                   |
| 0,123 | 0,117 | Hypoxia inducible factor 1 alpha inhibitor                        |
| 0,069 | 0,063 | Thiosulfate sulfurtransferase inhibitor                           |
| 0,050 | 0,044 | Pyruvate, water dikinase inhibitor                                |
| 0,119 | 0,113 | N-Carbamoyl-D-amino acid hydrolase inhibitor                      |
| 0,124 | 0,118 | L-glucuronate reductase inhibitor                                 |
| 0,111 | 0,106 | Acylaminoacyl-peptidase inhibitor                                 |
| 0,038 | 0,033 | Strombine dehydrogenase inhibitor                                 |
| 0,037 | 0,031 | GABA B receptor antagonist                                        |
| 0,079 | 0,074 | CYP2B4 substrate                                                  |
| 0,128 | 0,123 | Envelysin inhibitor                                               |
| 0,049 | 0,044 | Uracil phosphoribosyltransferase inhibitor                        |
| 0,095 | 0,090 | Estrone sulfotransferase inhibitor                                |
| 0,043 | 0,038 | Polyphosphate kinase inhibitor                                    |
| 0,104 | 0,099 | Prolactin inhibitor                                               |
| 0,129 | 0,125 | Glucuronate isomerase inhibitor                                   |
| 0,087 | 0,083 | Chloramphenicol O-acetyltransferase inhibitor                     |
| 0,043 | 0,038 | Pregnane X receptor antagonist                                    |
| 0,108 | 0,104 | Aldehyde dehydrogenase (NAD+) inhibitor                           |
| 0,033 | 0,029 | Ribose-5-phosphate adenylyltransferase inhibitor                  |
| 0,065 | 0,061 | Phosphoglycolate phosphatase inhibitor                            |
| 0,073 | 0,069 | Carboxypeptidase M inhibitor                                      |
| 0,033 | 0,029 | RNA agonist                                                       |
| 0,024 | 0,020 | Dolichyldiphosphatase inhibitor                                   |
| 0,096 | 0,092 | Asparaginase inhibitor                                            |
| 0,022 | 0,018 | Dopamine D2B antagonist                                           |
| 0,032 | 0,029 | Diphosphate-serine phosphotransferase inhibitor                   |

|       |       |                                                                |
|-------|-------|----------------------------------------------------------------|
| 0,097 | 0,094 | Alkanal monooxygenase (FMN-linked) inhibitor                   |
| 0,016 | 0,013 | CYP11B1 substrate                                              |
| 0,021 | 0,019 | CYP27A substrate                                               |
| 0,034 | 0,032 | Phosphoserine transaminase inhibitor                           |
| 0,053 | 0,050 | Aryl hydrocarbon receptor antagonist                           |
| 0,111 | 0,109 | Diphosphomevalonate decarboxylase inhibitor                    |
| 0,036 | 0,034 | [Isocitrate dehydrogenase (NADP+)] kinase inhibitor            |
| 0,037 | 0,035 | Sodium-dependent vitamin C transporter 2 inhibitor             |
| 0,074 | 0,072 | Alcohol oxidase inhibitor                                      |
| 0,167 | 0,166 | Diabetic nephropathy treatment                                 |
| 0,098 | 0,096 | Deoxycytidylate 5-hydroxymethyltransferase inhibitor           |
| 0,058 | 0,056 | Citrate (Si)-synthase inhibitor                                |
| 0,143 | 0,142 | Histidinol-phosphatase inhibitor                               |
| 0,022 | 0,020 | Sigma 3 receptor antagonist                                    |
| 0,027 | 0,025 | Glutamate (mGluR1a) agonist                                    |
| 0,027 | 0,025 | Glutamate (mGluR5a) agonist                                    |
| 0,058 | 0,057 | Fumarylacetoacetase inhibitor                                  |
| 0,060 | 0,059 | 3-Hydroxydecanoyl-[acyl-carrier-protein] dehydratase inhibitor |
| 0,058 | 0,058 | NMN nucleosidase inhibitor                                     |
| 0,044 | 0,044 | Mannosyl-oligosaccharide glucosidase inhibitor                 |

## Complex 4 All

☒ All
 ☐ Pa>Pi
 ☐ Pa>0,3
 ☐ Pa>0,7

| Pa    | Pi    | Activity                                             |
|-------|-------|------------------------------------------------------|
| 0,799 | 0,034 | Phobic disorders treatment                           |
| 0,731 | 0,003 | Antineoplastic (non-Hodgkin's lymphoma)              |
| 0,733 | 0,008 | Phosphatase inhibitor                                |
| 0,752 | 0,038 | Testosterone 17beta-dehydrogenase (NADP+) inhibitor  |
| 0,733 | 0,025 | Nicotinic alpha6beta3beta4alpha5 receptor antagonist |
| 0,731 | 0,036 | Chymosin inhibitor                                   |
| 0,731 | 0,036 | Acrocyllindropepsin inhibitor                        |
| 0,731 | 0,036 | Saccharopepsin inhibitor                             |
| 0,693 | 0,009 | Antiasthmatic                                        |

|       |       |                                                                      |
|-------|-------|----------------------------------------------------------------------|
| 0,692 | 0,010 | Glucan 1,4-alpha-maltotriohydrolase inhibitor                        |
| 0,692 | 0,024 | 5-O-(4-coumaroyl)-D-quinic acid 3'-monooxygenase inhibitor           |
| 0,667 | 0,033 | Nicotinic alpha2beta2 receptor antagonist                            |
| 0,663 | 0,041 | Sugar-phosphatase inhibitor                                          |
| 0,654 | 0,033 | Acylcarnitine hydrolase inhibitor                                    |
| 0,647 | 0,027 | Alkylacetylglucophosphatase inhibitor                                |
| 0,613 | 0,038 | Ribulose-phosphate 3-epimerase inhibitor                             |
| 0,579 | 0,016 | Antipruritic, allergic                                               |
| 0,644 | 0,082 | Aspulvinone dimethylallyltransferase inhibitor                       |
| 0,567 | 0,013 | Dolichyl-diphosphooligosaccharide-protein glycotransferase inhibitor |
| 0,628 | 0,076 | CYP2J substrate                                                      |
| 0,554 | 0,009 | Imidazoline receptor agonist                                         |
| 0,580 | 0,043 | Antidyskinetic                                                       |
| 0,604 | 0,067 | Polyporopepsin inhibitor                                             |
| 0,581 | 0,060 | Glutamyl endopeptidase II inhibitor                                  |
| 0,538 | 0,027 | Antipruritic                                                         |
| 0,545 | 0,038 | 27-Hydroxycholesterol 7alpha-monooxygenase inhibitor                 |
| 0,519 | 0,015 | Rhinitis treatment                                                   |
| 0,528 | 0,024 | Mannan endo-1,4-beta-mannosidase inhibitor                           |
| 0,558 | 0,055 | Antineoplastic                                                       |
| 0,606 | 0,105 | Ubiquinol-cytochrome-c reductase inhibitor                           |
| 0,520 | 0,026 | CYP2A4 substrate                                                     |
| 0,568 | 0,074 | CYP2J2 substrate                                                     |
| 0,503 | 0,010 | Antidiabetic (type 2)                                                |
| 0,536 | 0,055 | Alkenylglycerophosphocholine hydrolase inhibitor                     |
| 0,536 | 0,057 | Complement factor D inhibitor                                        |
| 0,498 | 0,028 | Antiallergic                                                         |
| 0,479 | 0,011 | RNA directed DNA polymerase inhibitor                                |
| 0,529 | 0,061 | NADPH peroxidase inhibitor                                           |
| 0,523 | 0,057 | Platelet aggregation stimulant                                       |
| 0,494 | 0,033 | Dermatologic                                                         |
| 0,470 | 0,011 | DNA polymerase I inhibitor                                           |
| 0,478 | 0,020 | Dementia treatment                                                   |
| 0,504 | 0,051 | Chloride peroxidase inhibitor                                        |
| 0,467 | 0,026 | Membrane permeability enhancer                                       |
| 0,502 | 0,064 | Macrophage colony stimulating factor agonist                         |
| 0,493 | 0,059 | UDP-N-acetylglucosamine 4-epimerase inhibitor                        |

|       |       |                                                            |
|-------|-------|------------------------------------------------------------|
| 0,492 | 0,060 | Glucan endo-1,3-beta-D-glucosidase inhibitor               |
| 0,469 | 0,037 | Acetylesterase inhibitor                                   |
| 0,465 | 0,034 | Glyoxylate reductase inhibitor                             |
| 0,441 | 0,010 | Antiviral (Hepatitis B)                                    |
| 0,455 | 0,025 | Albendazole monooxygenase inhibitor                        |
| 0,479 | 0,054 | Pterin deaminase inhibitor                                 |
| 0,434 | 0,014 | Imidazoline I1 receptor agonist                            |
| 0,480 | 0,063 | Limulus clotting factor B inhibitor                        |
| 0,474 | 0,058 | Glucan endo-1,6-beta-glucosidase inhibitor                 |
| 0,449 | 0,034 | Peptidoglycan glycosyltransferase inhibitor                |
| 0,456 | 0,041 | CYP2B5 substrate                                           |
| 0,423 | 0,011 | Antipruritic, non-allergic                                 |
| 0,457 | 0,044 | Antiviral (Rhinovirus)                                     |
| 0,422 | 0,011 | Opioid dependency treatment                                |
| 0,437 | 0,026 | Cutinase inhibitor                                         |
| 0,470 | 0,061 | Phosphatidylcholine-retinol O-acyltransferase inhibitor    |
| 0,455 | 0,047 | L-glutamate oxidase inhibitor                              |
| 0,484 | 0,079 | Platelet adhesion inhibitor                                |
| 0,476 | 0,075 | Electron-transferring-flavoprotein dehydrogenase inhibitor |
| 0,404 | 0,011 | Chronic obstructive pulmonary disease treatment            |
| 0,434 | 0,042 | All-trans-retinyl-palmitate hydrolase inhibitor            |
| 0,448 | 0,057 | Cyclic AMP agonist                                         |
| 0,447 | 0,056 | Feruloyl esterase inhibitor                                |
| 0,454 | 0,063 | 1,4-Lactonase inhibitor                                    |
| 0,461 | 0,070 | Carboxypeptidase Taq inhibitor                             |
| 0,430 | 0,039 | Pullulanase inhibitor                                      |
| 0,444 | 0,055 | Exoribonuclease II inhibitor                               |
| 0,417 | 0,028 | Phosphatidylinositol diacylglycerol-lyase inhibitor        |
| 0,474 | 0,089 | Omptin inhibitor                                           |
| 0,398 | 0,013 | Endo-1,3(4)-beta-glucanase inhibitor                       |
| 0,435 | 0,051 | Apyrase inhibitor                                          |
| 0,460 | 0,076 | Lysase inhibitor                                           |
| 0,405 | 0,021 | Prostate cancer treatment                                  |
| 0,440 | 0,060 | Hydrogen dehydrogenase inhibitor                           |
| 0,485 | 0,105 | Glycosylphosphatidylinositol phospholipase D inhibitor     |
| 0,486 | 0,107 | Kidney function stimulant                                  |
| 0,437 | 0,061 | Trimethylamine-oxide aldolase inhibitor                    |

|       |       |                                                                                                 |
|-------|-------|-------------------------------------------------------------------------------------------------|
| 0,432 | 0,058 | CYP3A5 substrate                                                                                |
| 0,446 | 0,074 | Venombin AB inhibitor                                                                           |
| 0,417 | 0,045 | Simian immunodeficiency virus proteinase inhibitor                                              |
| 0,441 | 0,071 | JAK2 expression inhibitor                                                                       |
| 0,420 | 0,056 | Gluconate 5-dehydrogenase inhibitor                                                             |
| 0,385 | 0,024 | Oxidizing agent                                                                                 |
| 0,418 | 0,058 | CYP2D15 substrate                                                                               |
| 0,415 | 0,059 | 3-Hydroxybenzoate 6-monooxygenase inhibitor                                                     |
| 0,357 | 0,002 | Glucocorticoid agonist                                                                          |
| 0,391 | 0,040 | Antiviral (Herpes)                                                                              |
| 0,364 | 0,014 | Vascular dementia treatment                                                                     |
| 0,376 | 0,028 | Sorbitol-6-phosphate 2-dehydrogenase inhibitor                                                  |
| 0,394 | 0,046 | Malate oxidase inhibitor                                                                        |
| 0,379 | 0,031 | Taurine-2-oxoglutarate transaminase inhibitor                                                   |
| 0,411 | 0,063 | Immunosuppressant                                                                               |
| 0,496 | 0,151 | Membrane permeability inhibitor                                                                 |
| 0,459 | 0,115 | Fusarinine-C ornithinesterase inhibitor                                                         |
| 0,401 | 0,057 | Alkenylglycerophosphoethanolamine hydrolase inhibitor                                           |
| 0,373 | 0,030 | Xylan endo-1,3-beta-xylosidase inhibitor                                                        |
| 0,402 | 0,060 | Acetylgalactosaminyl-O-glycosyl-glycoprotein beta-1,3-N-acetylglucosaminyltransferase inhibitor |
| 0,426 | 0,089 | Alopecia treatment                                                                              |
| 0,401 | 0,064 | Adenomatous polyposis treatment                                                                 |
| 0,386 | 0,049 | Aspergillopepsin I inhibitor                                                                    |
| 0,455 | 0,120 | Pseudolysin inhibitor                                                                           |
| 0,362 | 0,028 | CDP-diacylglycerol-glycerol-3-phosphate 3-phosphatidyltransferase inhibitor                     |
| 0,393 | 0,060 | Na <sup>+</sup> -transporting two-sector ATPase inhibitor                                       |
| 0,347 | 0,014 | Systemic lupus erythematosus treatment                                                          |
| 0,421 | 0,091 | Thioredoxin inhibitor                                                                           |
| 0,369 | 0,040 | Glucan 1,4-alpha-maltotetraohydrolase inhibitor                                                 |
| 0,366 | 0,038 | Glycolate dehydrogenase inhibitor                                                               |
| 0,367 | 0,039 | Poly(beta-D-mannuronate) lyase inhibitor                                                        |
| 0,356 | 0,033 | Shikimate O-hydroxycinnamoyltransferase inhibitor                                               |
| 0,380 | 0,057 | GABA aminotransferase inhibitor                                                                 |
| 0,331 | 0,010 | Alpha-pinene-oxide decyclase inhibitor                                                          |
| 0,382 | 0,063 | N-acetylneuraminate 7-O(or 9-O)-acetyltransferase inhibitor                                     |
| 0,347 | 0,030 | Antiinflammatory, ophthalmic                                                                    |
| 0,334 | 0,019 | Maltose-transporting ATPase inhibitor                                                           |

|       |       |                                                                                           |
|-------|-------|-------------------------------------------------------------------------------------------|
| 0,393 | 0,078 | Fatty-acyl-CoA synthase inhibitor                                                         |
| 0,357 | 0,043 | Cardiovascular analeptic                                                                  |
| 0,400 | 0,086 | Lysine 2,3-aminomutase inhibitor                                                          |
| 0,352 | 0,037 | Clavamate synthase inhibitor                                                              |
| 0,426 | 0,112 | Phthalate 4,5-dioxygenase inhibitor                                                       |
| 0,381 | 0,068 | Formaldehyde transketolase inhibitor                                                      |
| 0,391 | 0,079 | Fragilysin inhibitor                                                                      |
| 0,402 | 0,091 | Neurotransmitter antagonist                                                               |
| 0,429 | 0,120 | Acetylcholine neuromuscular blocking agent                                                |
| 0,333 | 0,029 | Sclerosant                                                                                |
| 0,349 | 0,047 | Undecaprenyldiphospho-muramoylpentapeptide beta-N-acetylglucosaminyltransferase inhibitor |
| 0,353 | 0,051 | CYP7 inhibitor                                                                            |
| 0,329 | 0,028 | Galactolipase inhibitor                                                                   |
| 0,338 | 0,037 | Yeast ribonuclease inhibitor                                                              |
| 0,306 | 0,005 | Alternansucrase inhibitor                                                                 |
| 0,351 | 0,050 | Mannose isomerase inhibitor                                                               |
| 0,385 | 0,085 | Vasoprotector                                                                             |
| 0,407 | 0,108 | Phospholipid-translocating ATPase inhibitor                                               |
| 0,411 | 0,113 | Ovulation inhibitor                                                                       |
| 0,352 | 0,054 | H <sup>+</sup> -transporting two-sector ATPase inhibitor                                  |
| 0,381 | 0,084 | CYP2D16 substrate                                                                         |
| 0,304 | 0,009 | Allergic rhinitis treatment                                                               |
| 0,344 | 0,049 | 2-Haloacid dehalogenase inhibitor                                                         |
| 0,338 | 0,044 | CYP2B11 substrate                                                                         |
| 0,411 | 0,117 | Protein-disulfide reductase (glutathione) inhibitor                                       |
| 0,340 | 0,047 | Cyclomaltodextrinase inhibitor                                                            |
| 0,374 | 0,081 | Dehydro-L-gulonate decarboxylase inhibitor                                                |
| 0,314 | 0,022 | Undecaprenyl-diphosphatase inhibitor                                                      |
| 0,336 | 0,045 | Fructan beta-fructosidase inhibitor                                                       |
| 0,325 | 0,037 | GST M substrate                                                                           |
| 0,297 | 0,011 | GST T substrate                                                                           |
| 0,297 | 0,011 | GST T1-1 substrate                                                                        |
| 0,315 | 0,029 | Styrene-oxide isomerase inhibitor                                                         |
| 0,357 | 0,071 | Cyclohexanone monooxygenase inhibitor                                                     |
| 0,398 | 0,113 | NADPH-cytochrome-c2 reductase inhibitor                                                   |
| 0,353 | 0,068 | Mucinaminyserine mucinaminidase inhibitor                                                 |
| 0,359 | 0,074 | EIF4E expression inhibitor                                                                |

|       |       |                                                     |
|-------|-------|-----------------------------------------------------|
| 0,315 | 0,031 | Phosphoenolpyruvate mutase inhibitor                |
| 0,345 | 0,061 | Limulus clotting factor C inhibitor                 |
| 0,341 | 0,058 | Nitrite reductase (NO-forming) inhibitor            |
| 0,383 | 0,101 | Erythropoiesis stimulant                            |
| 0,327 | 0,046 | H <sup>+</sup> -exporting ATPase inhibitor          |
| 0,356 | 0,076 | Thymidylate 5'-phosphatase inhibitor                |
| 0,337 | 0,059 | IgA-specific serine endopeptidase inhibitor         |
| 0,331 | 0,053 | Sulfite oxidase inhibitor                           |
| 0,294 | 0,017 | Ligase inhibitor                                    |
| 0,315 | 0,038 | Pediculicide                                        |
| 0,381 | 0,105 | Leukopoiesis stimulant                              |
| 0,298 | 0,021 | Hydroxysteroid dehydrogenase inhibitor              |
| 0,308 | 0,036 | D-alanine 2-hydroxymethyltransferase inhibitor      |
| 0,336 | 0,064 | Steroid N-acetylglucosaminyltransferase inhibitor   |
| 0,369 | 0,099 | GST A substrate                                     |
| 0,305 | 0,036 | Pseudouridylate synthase inhibitor                  |
| 0,338 | 0,068 | CYP2D2 inhibitor                                    |
| 0,334 | 0,067 | RELA expression inhibitor                           |
| 0,352 | 0,085 | Polyamine-transporting ATPase inhibitor             |
| 0,359 | 0,094 | Arginine 2-monooxygenase inhibitor                  |
| 0,297 | 0,032 | Fumarate reductase (NADH) inhibitor                 |
| 0,354 | 0,090 | G-protein-coupled receptor kinase inhibitor         |
| 0,354 | 0,090 | Beta-adrenergic receptor kinase inhibitor           |
| 0,346 | 0,082 | Phenol O-methyltransferase inhibitor                |
| 0,318 | 0,055 | Hematopoietic inhibitor                             |
| 0,311 | 0,050 | Glyoxylate oxidase inhibitor                        |
| 0,310 | 0,050 | DNA synthesis inhibitor                             |
| 0,326 | 0,067 | Phosphopantothenoilcysteine decarboxylase inhibitor |
| 0,400 | 0,140 | CYP3A2 substrate                                    |
| 0,387 | 0,128 | 5 Hydroxytryptamine uptake stimulant                |
| 0,308 | 0,049 | CYP2B10 substrate                                   |
| 0,293 | 0,034 | Antineoplastic (small cell lung cancer)             |
| 0,264 | 0,007 | Endometriosis treatment                             |
| 0,364 | 0,107 | (R)-6-hydroxynicotine oxidase inhibitor             |
| 0,264 | 0,007 | Arachidonic acid antagonist                         |
| 0,260 | 0,004 | Cyclin-dependent kinase 7 inhibitor                 |
| 0,290 | 0,033 | Licheninase inhibitor                               |

|       |       |                                                                              |
|-------|-------|------------------------------------------------------------------------------|
| 0,396 | 0,141 | Membrane integrity agonist                                                   |
| 0,352 | 0,097 | Ecdysone 20-monooxygenase inhibitor                                          |
| 0,300 | 0,046 | Steroid synthesis inhibitor                                                  |
| 0,324 | 0,070 | Antidiabetic                                                                 |
| 0,312 | 0,058 | Dextranase inhibitor                                                         |
| 0,261 | 0,008 | Glucan 1,3-beta-glucosidase inhibitor                                        |
| 0,319 | 0,066 | Opioid kappa 3 receptor antagonist                                           |
| 0,278 | 0,025 | Antimycoplasmal                                                              |
| 0,289 | 0,037 | Dopamine release stimulant                                                   |
| 0,355 | 0,104 | 4-Nitrophenol 2-monooxygenase inhibitor                                      |
| 0,322 | 0,071 | Peptide-N4-(N-acetyl-beta-glucosaminy)asparagine amidase inhibitor           |
| 0,334 | 0,083 | (S)-6-hydroxynicotine oxidase inhibitor                                      |
| 0,320 | 0,069 | N-formylmethionyl-peptidase inhibitor                                        |
| 0,297 | 0,047 | Carminative                                                                  |
| 0,343 | 0,093 | Aspartate-phenylpyruvate transaminase inhibitor                              |
| 0,354 | 0,104 | Fibrolase inhibitor                                                          |
| 0,297 | 0,048 | 2,3,4,5-Tetrahydropyridine-2,6-dicarboxylate N-succinyltransferase inhibitor |
| 0,369 | 0,121 | CYP2C12 substrate                                                            |
| 0,304 | 0,056 | Antineoplastic (pancreatic cancer)                                           |
| 0,363 | 0,116 | Aminobutyraldehyde dehydrogenase inhibitor                                   |
| 0,341 | 0,095 | Cl--transporting ATPase inhibitor                                            |
| 0,341 | 0,096 | Caspase 8 stimulant                                                          |
| 0,321 | 0,077 | Phosphoinositide 5-phosphatase inhibitor                                     |
| 0,294 | 0,051 | Quinoprotein glucose dehydrogenase inhibitor                                 |
| 0,300 | 0,057 | DELTA14-sterol reductase inhibitor                                           |
| 0,345 | 0,103 | Dimethylargininase inhibitor                                                 |
| 0,276 | 0,035 | Bisphosphoglycerate mutase inhibitor                                         |
| 0,318 | 0,081 | Prostaglandin-A1 DELTA-isomerase inhibitor                                   |
| 0,334 | 0,097 | Glycerol-3-phosphate oxidase inhibitor                                       |
| 0,356 | 0,119 | Antiinflammatory                                                             |
| 0,329 | 0,094 | Manganese peroxidase inhibitor                                               |
| 0,288 | 0,054 | Hyaluronic acid agonist                                                      |
| 0,369 | 0,137 | Antiviral (Picornavirus)                                                     |
| 0,255 | 0,023 | GABA B receptor agonist                                                      |
| 0,334 | 0,103 | Antimyopathies                                                               |
| 0,323 | 0,093 | Histidine N-acetyltransferase inhibitor                                      |
| 0,307 | 0,078 | Creatininase inhibitor                                                       |

|       |       |                                                                 |
|-------|-------|-----------------------------------------------------------------|
| 0,274 | 0,046 | Alpha-N-acetylglucosaminidase inhibitor                         |
| 0,271 | 0,043 | Alkylglycerophosphoethanolamine phosphodiesterase inhibitor     |
| 0,281 | 0,054 | Adrenaline release stimulant                                    |
| 0,330 | 0,104 | CYP4A11 substrate                                               |
| 0,252 | 0,027 | 2-Dehydropantoate aldolase inhibitor                            |
| 0,300 | 0,075 | tRNA-pseudouridine synthase I inhibitor                         |
| 0,273 | 0,049 | Oryzin inhibitor                                                |
| 0,267 | 0,045 | Myeloblastin inhibitor                                          |
| 0,235 | 0,013 | N-acetylneuraminate lyase inhibitor                             |
| 0,297 | 0,076 | Lysostaphin inhibitor                                           |
| 0,286 | 0,065 | RNA synthesis inhibitor                                         |
| 0,292 | 0,072 | Arylmalonate decarboxylase inhibitor                            |
| 0,301 | 0,081 | Antimetastatic                                                  |
| 0,316 | 0,096 | CYP2A8 substrate                                                |
| 0,244 | 0,025 | Deoxyribonuclease I inhibitor                                   |
| 0,301 | 0,082 | 3-Cyanoalanine hydratase inhibitor                              |
| 0,320 | 0,102 | Sphinganine kinase inhibitor                                    |
| 0,396 | 0,178 | Calcium channel (voltage-sensitive) activator                   |
| 0,281 | 0,064 | NF-E2-related factor 2 stimulant                                |
| 0,300 | 0,084 | Alcohol dehydrogenase (acceptor) inhibitor                      |
| 0,314 | 0,098 | Tpr proteinase ( <i>Porphyromonas gingivalis</i> ) inhibitor    |
| 0,340 | 0,125 | Histamine release stimulant                                     |
| 0,276 | 0,061 | CYP2A2 substrate                                                |
| 0,311 | 0,096 | Pro-opiomelanocortin converting enzyme inhibitor                |
| 0,285 | 0,070 | Hydroxylamine reductase (NADH) inhibitor                        |
| 0,222 | 0,008 | 4-Carboxymethyl-4-methylbutenolide mutase inhibitor             |
| 0,258 | 0,044 | Polyneuridine-aldehyde esterase inhibitor                       |
| 0,340 | 0,128 | Pin1 inhibitor                                                  |
| 0,246 | 0,035 | Alpha-glucuronidase inhibitor                                   |
| 0,236 | 0,025 | Galacturan 1,4-alpha-galacturonidase inhibitor                  |
| 0,246 | 0,035 | Tropinesterase inhibitor                                        |
| 0,224 | 0,014 | Aconitate decarboxylase inhibitor                               |
| 0,271 | 0,061 | Linoleoyl-CoA desaturase inhibitor                              |
| 0,345 | 0,136 | Cytoprotectant                                                  |
| 0,241 | 0,034 | Ribonucleoside triphosphate reductase inhibitor                 |
| 0,259 | 0,052 | Protein-Npi-phosphohistidine-sugar phosphotransferase inhibitor |
| 0,351 | 0,145 | Antinociceptive                                                 |

|       |       |                                                              |
|-------|-------|--------------------------------------------------------------|
| 0,243 | 0,037 | Rhizopuspepsin inhibitor                                     |
| 0,256 | 0,050 | N-Acyl-D-aspartate deacylase inhibitor                       |
| 0,215 | 0,009 | Keratosis actinic (solar) treatment                          |
| 0,325 | 0,123 | CYP3A1 substrate                                             |
| 0,284 | 0,083 | Glutamine-phenylpyruvate transaminase inhibitor              |
| 0,257 | 0,056 | Aspergillopepsin II inhibitor                                |
| 0,227 | 0,027 | 2,2-Dialkylglycine decarboxylase (pyruvate) inhibitor        |
| 0,221 | 0,020 | DNA nucleotidyltransferase inhibitor                         |
| 0,331 | 0,131 | 2-Dehydropantoate 2-reductase inhibitor                      |
| 0,314 | 0,116 | Linoleate diol synthase inhibitor                            |
| 0,287 | 0,088 | 3-Phytase inhibitor                                          |
| 0,257 | 0,059 | Aldosterone antagonist                                       |
| 0,294 | 0,097 | Methylamine-glutamate N-methyltransferase inhibitor          |
| 0,288 | 0,090 | Adenylyl-sulfate reductase inhibitor                         |
| 0,246 | 0,048 | Poly(alpha-L-guluronate) lyase inhibitor                     |
| 0,282 | 0,085 | Chitosanase inhibitor                                        |
| 0,322 | 0,125 | Rubredoxin-NAD <sup>+</sup> reductase inhibitor              |
| 0,309 | 0,113 | Centromere associated protein inhibitor                      |
| 0,251 | 0,056 | Horrisin inhibitor                                           |
| 0,271 | 0,076 | 2-Hydroxymuconate-semialdehyde hydrolase inhibitor           |
| 0,232 | 0,039 | 1,4-Alpha-glucan branching enzyme inhibitor                  |
| 0,212 | 0,019 | Trehalose-phosphatase inhibitor                              |
| 0,302 | 0,109 | Glucose oxidase inhibitor                                    |
| 0,250 | 0,058 | UGT2B28 substrate                                            |
| 0,282 | 0,090 | ADP-thymidine kinase inhibitor                               |
| 0,279 | 0,087 | N-acylmannosamine kinase inhibitor                           |
| 0,286 | 0,094 | Chenodeoxycholytaurine hydrolase inhibitor                   |
| 0,249 | 0,058 | Chaperonin ATPase inhibitor                                  |
| 0,267 | 0,077 | CYP2C29 substrate                                            |
| 0,260 | 0,071 | Dipeptidase E inhibitor                                      |
| 0,271 | 0,082 | Cytostatic                                                   |
| 0,252 | 0,063 | Antiprotozoal (Trichomonas)                                  |
| 0,238 | 0,051 | Vitamin-K-epoxide reductase (warfarin-insensitive) inhibitor |
| 0,270 | 0,083 | Glutamate-tRNA ligase inhibitor                              |
| 0,208 | 0,021 | Alpha-N-acetylgalactosaminidase inhibitor                    |
| 0,275 | 0,089 | D-lactaldehyde dehydrogenase inhibitor                       |
| 0,282 | 0,097 | CYP2F1 substrate                                             |

|       |       |                                                                          |
|-------|-------|--------------------------------------------------------------------------|
| 0,283 | 0,099 | Fucoesterol-epoxide lyase inhibitor                                      |
| 0,296 | 0,112 | Sulfite dehydrogenase inhibitor                                          |
| 0,304 | 0,120 | S-formylglutathione hydrolase inhibitor                                  |
| 0,343 | 0,159 | Thromboxane B2 antagonist                                                |
| 0,234 | 0,051 | Anthranilate-CoA ligase inhibitor                                        |
| 0,245 | 0,062 | Antineoplastic (brain cancer)                                            |
| 0,237 | 0,055 | N-acetyllactosaminide beta-1,3-N-acetylglucosaminyltransferase inhibitor |
| 0,190 | 0,008 | Inositol-3-phosphate synthase inhibitor                                  |
| 0,241 | 0,059 | 2-Oxoaldehyde dehydrogenase (NADP+) inhibitor                            |
| 0,260 | 0,078 | Long-chain-aldehyde dehydrogenase inhibitor                              |
| 0,247 | 0,065 | Levanase inhibitor                                                       |
| 0,196 | 0,015 | CYP3A5 inducer                                                           |
| 0,275 | 0,094 | Lysyl oxidase inhibitor                                                  |
| 0,241 | 0,060 | 2-Hydroxy-3-oxoadipate synthase inhibitor                                |
| 0,263 | 0,083 | MAP kinase kinase 4 inhibitor                                            |
| 0,304 | 0,124 | Biotinidase inhibitor                                                    |
| 0,215 | 0,035 | BRAF expression inhibitor                                                |
| 0,223 | 0,045 | NAD+ synthase (glutamine-hydrolysing) inhibitor                          |
| 0,187 | 0,008 | Tardive dyskinesia treatment                                             |
| 0,219 | 0,040 | 3-Chloro-D-alanine dehydrochlorinase inhibitor                           |
| 0,224 | 0,045 | D-xylulose reductase inhibitor                                           |
| 0,279 | 0,100 | Antisecretoric                                                           |
| 0,233 | 0,054 | Mannitol-1-phosphatase inhibitor                                         |
| 0,267 | 0,089 | Peptide alpha-N-acetyltransferase inhibitor                              |
| 0,229 | 0,052 | Dynein ATPase inhibitor                                                  |
| 0,203 | 0,026 | Riboflavin phosphotransferase inhibitor                                  |
| 0,245 | 0,068 | Benzaldehyde dehydrogenase (NADP+) inhibitor                             |
| 0,269 | 0,093 | Isopenicillin-N epimerase inhibitor                                      |
| 0,241 | 0,065 | Flavin-containing monooxygenase inhibitor                                |
| 0,232 | 0,057 | Cellulose 1,4-beta-cellobiosidase inhibitor                              |
| 0,255 | 0,081 | Transketolase inhibitor                                                  |
| 0,211 | 0,038 | Alkene monooxygenase inhibitor                                           |
| 0,247 | 0,074 | Salicylate 1-monooxygenase inhibitor                                     |
| 0,206 | 0,033 | Ferredoxin-NADP+ reductase inhibitor                                     |
| 0,301 | 0,128 | CYP2C9 inducer                                                           |
| 0,233 | 0,061 | 3-Methylbutanal reductase inhibitor                                      |
| 0,182 | 0,010 | Amylo-alpha-1,6-glucosidase inhibitor                                    |

|       |       |                                                                                  |
|-------|-------|----------------------------------------------------------------------------------|
| 0,246 | 0,075 | Gluconolactonase inhibitor                                                       |
| 0,291 | 0,120 | Membrane integrity antagonist                                                    |
| 0,241 | 0,071 | Bisphosphoglycerate phosphatase inhibitor                                        |
| 0,232 | 0,062 | Glutarate-semialdehyde dehydrogenase inhibitor                                   |
| 0,266 | 0,096 | Antipsoriatic                                                                    |
| 0,220 | 0,051 | Aureolysin inhibitor                                                             |
| 0,290 | 0,121 | Hydroxylamine oxidase inhibitor                                                  |
| 0,305 | 0,137 | CYP2A1 substrate                                                                 |
| 0,231 | 0,063 | Alpha-1,6-mannosyl-glycoprotein 4-beta-N-acetylglucosaminyltransferase inhibitor |
| 0,247 | 0,079 | NADH kinase inhibitor                                                            |
| 0,274 | 0,107 | Plastoquinol-plastocyanin reductase inhibitor                                    |
| 0,228 | 0,061 | Prunasin beta-glucosidase inhibitor                                              |
| 0,195 | 0,029 | Estradiol 17alpha-dehydrogenase inhibitor                                        |
| 0,249 | 0,084 | Glycerol-3-phosphate dehydrogenase inhibitor                                     |
| 0,249 | 0,084 | Endothelial growth factor antagonist                                             |
| 0,261 | 0,097 | CYP2A5 substrate                                                                 |
| 0,226 | 0,062 | Cyclooxygenase substrate                                                         |
| 0,232 | 0,069 | N-hydroxy-2-acetamidofluorene reductase inhibitor                                |
| 0,222 | 0,059 | Polygalacturonase inhibitor                                                      |
| 0,204 | 0,041 | Glycerol-1-phosphatase inhibitor                                                 |
| 0,167 | 0,004 | Inositol 1,4,5-triphosphate receptor antagonist                                  |
| 0,206 | 0,043 | Cycloartenol synthase inhibitor                                                  |
| 0,187 | 0,025 | Interferon antagonist                                                            |
| 0,200 | 0,038 | CYP2B18 substrate                                                                |
| 0,268 | 0,106 | Chitinase inhibitor                                                              |
| 0,240 | 0,078 | Ethanolamine-phosphate cytidyltransferase inhibitor                              |
| 0,201 | 0,040 | Antineoplastic (renal cancer)                                                    |
| 0,230 | 0,068 | Pappalysin-1 inhibitor                                                           |
| 0,263 | 0,102 | P-benzoquinone reductase (NADPH) inhibitor                                       |
| 0,305 | 0,144 | Pancreatic elastase inhibitor                                                    |
| 0,208 | 0,048 | Inulinase inhibitor                                                              |
| 0,281 | 0,122 | Cyanoalanine nitrilase inhibitor                                                 |
| 0,179 | 0,020 | Isoamylase inhibitor                                                             |
| 0,268 | 0,109 | Peptidyl-dipeptidase Dcp inhibitor                                               |
| 0,210 | 0,051 | Aryldialkylphosphatase inhibitor                                                 |
| 0,181 | 0,023 | Interferon gamma antagonist                                                      |
| 0,279 | 0,122 | (R)-Pantolactone dehydrogenase (flavin) inhibitor                                |

|       |       |                                                             |
|-------|-------|-------------------------------------------------------------|
| 0,193 | 0,037 | Glucan 1,6-alpha-glucosidase inhibitor                      |
| 0,189 | 0,033 | Carnitine dehydratase inhibitor                             |
| 0,305 | 0,150 | Chlordecone reductase inhibitor                             |
| 0,201 | 0,046 | Bile-salt sulfotransferase inhibitor                        |
| 0,205 | 0,051 | Lactaldehyde reductase inhibitor                            |
| 0,244 | 0,090 | Hepatoprotectant                                            |
| 0,275 | 0,120 | MMP9 expression inhibitor                                   |
| 0,278 | 0,124 | 5 Hydroxytryptamine release stimulant                       |
| 0,281 | 0,127 | Leukopoiesis inhibitor                                      |
| 0,208 | 0,055 | Snalysin inhibitor                                          |
| 0,194 | 0,040 | Allantoate deiminase inhibitor                              |
| 0,192 | 0,040 | Antineoplastic (ovarian cancer)                             |
| 0,217 | 0,065 | Glycine dehydrogenase (decarboxylating) inhibitor           |
| 0,198 | 0,046 | Aspartate-tRNA ligase inhibitor                             |
| 0,210 | 0,058 | (S)-3-amino-2-methylpropionate transaminase inhibitor       |
| 0,153 | 0,002 | Lipocortins synthesis agonist                               |
| 0,234 | 0,083 | S-alkylcysteine lyase inhibitor                             |
| 0,209 | 0,059 | Sedoheptulose-bisphosphatase inhibitor                      |
| 0,201 | 0,051 | Glucan 1,4-beta-glucosidase inhibitor                       |
| 0,286 | 0,137 | Cytochrome P450 stimulant                                   |
| 0,198 | 0,049 | 2-Haloacid dehalogenase (configuration-inverting) inhibitor |
| 0,188 | 0,039 | L-iduronidase inhibitor                                     |
| 0,244 | 0,095 | Aspergillus nuclease S1 inhibitor                           |
| 0,216 | 0,067 | GABA C receptor agonist                                     |
| 0,285 | 0,136 | Malate dehydrogenase (acceptor) inhibitor                   |
| 0,190 | 0,043 | Retinyl-palmitate esterase inhibitor                        |
| 0,168 | 0,022 | Demethylsterigmatocystin 6-O-methyltransferase inhibitor    |
| 0,228 | 0,082 | Antiperistaltic                                             |
| 0,313 | 0,167 | MAP kinase stimulant                                        |
| 0,192 | 0,046 | Cyclamate sulfohydrolase inhibitor                          |
| 0,191 | 0,045 | Acetylenecarboxylate hydratase inhibitor                    |
| 0,259 | 0,115 | CYP3A7 substrate                                            |
| 0,286 | 0,142 | Gonadotropin antagonist                                     |
| 0,183 | 0,039 | Glycerone-phosphate O-acyltransferase inhibitor             |
| 0,246 | 0,102 | 4-Coumarate-CoA ligase inhibitor                            |
| 0,239 | 0,096 | Transcription factor NF kappa A inhibitor                   |
| 0,196 | 0,053 | Nitric oxide scavenger                                      |

|       |       |                                                               |
|-------|-------|---------------------------------------------------------------|
| 0,211 | 0,069 | Crotonoyl-[acyl-carrier-protein] hydratase inhibitor          |
| 0,179 | 0,037 | Protein-glucosylgalactosylhydroxylysine glucosidase inhibitor |
| 0,273 | 0,132 | CYP2E1 inducer                                                |
| 0,218 | 0,078 | N-acetyllactosamine synthase inhibitor                        |
| 0,222 | 0,082 | Cyclohexyl-isocyanide hydratase inhibitor                     |
| 0,214 | 0,073 | Ornithine cyclodeaminase inhibitor                            |
| 0,309 | 0,169 | Oxygen scavenger                                              |
| 0,243 | 0,103 | Pyruvate decarboxylase inhibitor                              |
| 0,178 | 0,040 | Glucuronolactone reductase inhibitor                          |
| 0,190 | 0,052 | Myosin-light-chain-phosphatase inhibitor                      |
| 0,246 | 0,109 | Methylumbelliferyl-acetate deacetylase inhibitor              |
| 0,141 | 0,004 | Alpha 3 adrenoreceptor agonist                                |
| 0,205 | 0,068 | D-threo-aldose 1-dehydrogenase inhibitor                      |
| 0,228 | 0,091 | ATPase stimulant                                              |
| 0,168 | 0,032 | (R)-limonene 6-monooxygenase inhibitor                        |
| 0,207 | 0,071 | N-(long-chain-acyl)ethanolamine deacylase inhibitor           |
| 0,191 | 0,055 | Microtubule formation inhibitor                               |
| 0,216 | 0,080 | CYP2G1 substrate                                              |
| 0,147 | 0,012 | Phosphoglucomutase inhibitor                                  |
| 0,175 | 0,040 | Glycopeptide alpha-N-acetylgalactosaminidase inhibitor        |
| 0,243 | 0,109 | N-benzyloxycarbonylglycine hydrolase inhibitor                |
| 0,170 | 0,035 | Pectin lyase inhibitor                                        |
| 0,175 | 0,040 | Cholesterol oxidase inhibitor                                 |
| 0,265 | 0,132 | Myc inhibitor                                                 |
| 0,223 | 0,089 | Glutathione dehydrogenase (ascorbate) inhibitor               |
| 0,146 | 0,013 | Dextranucrase inhibitor                                       |
| 0,196 | 0,063 | 2,3-Dihydroxyindole 2,3-dioxygenase inhibitor                 |
| 0,149 | 0,016 | 2-Methylcitrate dehydratase inhibitor                         |
| 0,222 | 0,090 | Aspartate-ammonia ligase inhibitor                            |
| 0,205 | 0,072 | Procollagen N-endopeptidase inhibitor                         |
| 0,193 | 0,061 | Sterol 3-beta-glucosyltransferase inhibitor                   |
| 0,180 | 0,049 | Phosphoenolpyruvate-protein phosphotransferase inhibitor      |
| 0,222 | 0,091 | Lactose synthase inhibitor                                    |
| 0,195 | 0,064 | Leucine dehydrogenase inhibitor                               |
| 0,172 | 0,041 | Gaucher disease treatment                                     |
| 0,194 | 0,063 | Alkylglycerone-phosphate synthase inhibitor                   |
| 0,248 | 0,118 | Para amino benzoic acid antagonist                            |

|       |       |                                                          |
|-------|-------|----------------------------------------------------------|
| 0,202 | 0,072 | Tauropine dehydrogenase inhibitor                        |
| 0,225 | 0,095 | Cholestanetriol 26-monooxygenase inhibitor               |
| 0,252 | 0,123 | Enteropeptidase inhibitor                                |
| 0,153 | 0,024 | Antitreponemal                                           |
| 0,165 | 0,036 | Cocain dependency treatment                              |
| 0,225 | 0,097 | Carbon-monoxide dehydrogenase inhibitor                  |
| 0,269 | 0,141 | Endopeptidase So inhibitor                               |
| 0,150 | 0,022 | Shab potassium channel blocker                           |
| 0,225 | 0,097 | NOS2 expression inhibitor                                |
| 0,161 | 0,034 | Choloylglycine hydrolase inhibitor                       |
| 0,201 | 0,074 | Rhodotorulapepsin inhibitor                              |
| 0,189 | 0,062 | Alpha-amylase inhibitor                                  |
| 0,184 | 0,057 | GST M1-1 substrate                                       |
| 0,265 | 0,139 | Antiseborrheic                                           |
| 0,134 | 0,007 | Anesthetic inhalation                                    |
| 0,175 | 0,050 | Ganglioside galactosyltransferase inhibitor              |
| 0,316 | 0,192 | Octopamine antagonist                                    |
| 0,165 | 0,041 | Deoxyribose-phosphate aldolase inhibitor                 |
| 0,173 | 0,049 | Protein synthesis stimulant                              |
| 0,226 | 0,102 | Succinate-semialdehyde dehydrogenase [NAD(P)+] inhibitor |
| 0,137 | 0,013 | Thromboxane antagonist                                   |
| 0,207 | 0,083 | Di-trans,poly-cis-decaprenylcistransferase inhibitor     |
| 0,170 | 0,046 | 3-Ketovalidoxylamine C-N-lyase inhibitor                 |
| 0,207 | 0,084 | Carboxypeptidase D inhibitor                             |
| 0,175 | 0,053 | Testosterone 17beta-dehydrogenase inhibitor              |
| 0,210 | 0,088 | Morphine 6-dehydrogenase inhibitor                       |
| 0,136 | 0,014 | Fatty-acyl-ethyl-ester synthase inhibitor                |
| 0,239 | 0,117 | Thiosulfate dehydrogenase inhibitor                      |
| 0,158 | 0,037 | Pregnane X receptor agonist                              |
| 0,171 | 0,049 | Saccharolysin inhibitor                                  |
| 0,241 | 0,119 | Ferredoxin-NAD+ reductase inhibitor                      |
| 0,241 | 0,119 | Naphthalene 1,2-dioxygenase inhibitor                    |
| 0,199 | 0,078 | Peptidyl-dipeptidase B inhibitor                         |
| 0,186 | 0,065 | Serratia marcescens nuclease inhibitor                   |
| 0,213 | 0,093 | DNA ligase (ATP) inhibitor                               |
| 0,174 | 0,054 | Polar-amino-acid-transporting ATPase inhibitor           |
| 0,207 | 0,087 | Dimethylmaleate hydratase inhibitor                      |

|       |       |                                                                      |
|-------|-------|----------------------------------------------------------------------|
| 0,162 | 0,042 | Glutamate-1-semialdehyde 2,1-aminomutase inhibitor                   |
| 0,136 | 0,017 | 3(or 17)beta-hydroxysteroid dehydrogenase inhibitor                  |
| 0,199 | 0,080 | Guanosine-3',5'-bis(diphosphate) 3'-diphosphatase inhibitor          |
| 0,259 | 0,140 | NAD(P)+-arginine ADP-ribosyltransferase inhibitor                    |
| 0,182 | 0,064 | ADP-ribosylarginine hydrolase inhibitor                              |
| 0,179 | 0,061 | Farnesyltranstransferase inhibitor                                   |
| 0,131 | 0,014 | Imidazoleglycerol-phosphate dehydratase inhibitor                    |
| 0,151 | 0,034 | Glyceraldehyde-3-phosphate dehydrogenase (phosphorylating) inhibitor |
| 0,169 | 0,052 | Dolichyl-phosphatase inhibitor                                       |
| 0,196 | 0,080 | UGT2B17 substrate                                                    |
| 0,153 | 0,037 | Trimethyllysine dioxygenase inhibitor                                |
| 0,211 | 0,096 | Opheline kinase inhibitor                                            |
| 0,211 | 0,096 | Taurocyamine kinase inhibitor                                        |
| 0,200 | 0,085 | Glycerol 2-dehydrogenase (NADP+) inhibitor                           |
| 0,175 | 0,060 | Trans-pentaprenyltranstransferase inhibitor                          |
| 0,186 | 0,071 | Dependence treatment                                                 |
| 0,210 | 0,096 | [acyl-carrier-protein] S-acetyltransferase inhibitor                 |
| 0,236 | 0,121 | 4-Methoxybenzoate monooxygenase (O-demethylating) inhibitor          |
| 0,283 | 0,169 | RNA-directed RNA polymerase inhibitor                                |
| 0,133 | 0,019 | Mycodextranase inhibitor                                             |
| 0,168 | 0,054 | Mannan endo-1,6-alpha-mannosidase inhibitor                          |
| 0,169 | 0,056 | Glutamate (mGluR5) agonist                                           |
| 0,186 | 0,073 | Sweetener                                                            |
| 0,305 | 0,192 | Fructose 5-dehydrogenase inhibitor                                   |
| 0,222 | 0,110 | Thiamine-triphosphatase inhibitor                                    |
| 0,227 | 0,115 | Thiamine pyridinylase inhibitor                                      |
| 0,168 | 0,056 | Thioredoxin reductase inhibitor                                      |
| 0,161 | 0,050 | Allantoinase inhibitor                                               |
| 0,223 | 0,112 | Calcium channel activator                                            |
| 0,203 | 0,092 | Gamma-D-Glutamyl-meso-diaminopimelate peptidase inhibitor            |
| 0,154 | 0,043 | Glucarate dehydratase inhibitor                                      |
| 0,215 | 0,105 | Arylesterase inhibitor                                               |
| 0,211 | 0,102 | Antifibrinolytic                                                     |
| 0,129 | 0,020 | Gentamicin 2"-nucleotidyltransferase inhibitor                       |
| 0,142 | 0,034 | DELTA24-sterol reductase inhibitor                                   |
| 0,171 | 0,062 | Laminaribiose phosphorylase inhibitor                                |
| 0,148 | 0,040 | (S)-carnitine 3-dehydrogenase inhibitor                              |

|       |       |                                                                                 |
|-------|-------|---------------------------------------------------------------------------------|
| 0,217 | 0,109 | CYP2C3 substrate                                                                |
| 0,153 | 0,045 | Xylose isomerase inhibitor                                                      |
| 0,258 | 0,151 | CYP3A4 inducer                                                                  |
| 0,180 | 0,073 | Tentoxilysin inhibitor                                                          |
| 0,134 | 0,028 | Phosphatidylinositol 3-kinase stimulant                                         |
| 0,157 | 0,052 | Pancreatic endopeptidase E inhibitor                                            |
| 0,153 | 0,047 | Antineoplastic antimetabolite                                                   |
| 0,202 | 0,096 | Meprin B inhibitor                                                              |
| 0,161 | 0,056 | N-acetylneuraminate synthase inhibitor                                          |
| 0,169 | 0,064 | Calcium-sensing receptor agonist                                                |
| 0,158 | 0,053 | Hepatocyte nuclear factor antagonist                                            |
| 0,158 | 0,053 | Hepatocyte nuclear factor 4 alpha antagonist                                    |
| 0,138 | 0,034 | Succinate dehydrogenase inhibitor                                               |
| 0,156 | 0,051 | N-(5-amino-5-carboxypentanoyl)-L-cysteinyl-D-valine synthase inhibitor          |
| 0,205 | 0,101 | Glycine amidinotransferase inhibitor                                            |
| 0,116 | 0,012 | Osmotic diuretic                                                                |
| 0,158 | 0,055 | Alpha-N-arabinofuranosidase inhibitor                                           |
| 0,152 | 0,048 | Asparagine-tRNA ligase inhibitor                                                |
| 0,224 | 0,121 | Aldehyde dehydrogenase (pyrroloquinoline-quinone) inhibitor                     |
| 0,137 | 0,034 | Thermomycin inhibitor                                                           |
| 0,252 | 0,149 | Lipoprotein lipase inhibitor                                                    |
| 0,277 | 0,174 | Caspase 3 stimulant                                                             |
| 0,152 | 0,050 | Acyl-lysine deacylase inhibitor                                                 |
| 0,121 | 0,019 | Alpha glucosidase inhibitor                                                     |
| 0,113 | 0,011 | Nav1.7 sodium channel blocker                                                   |
| 0,324 | 0,223 | Antineurotic                                                                    |
| 0,247 | 0,146 | CYP3A inducer                                                                   |
| 0,123 | 0,021 | High-mannose-oligosaccharide beta-1,4-N-acetylglucosaminyltransferase inhibitor |
| 0,122 | 0,020 | Ca <sup>2+</sup> -transporting ATPase inhibitor                                 |
| 0,139 | 0,038 | 4-Alpha-glucanotransferase inhibitor                                            |
| 0,161 | 0,060 | Galactokinase inhibitor                                                         |
| 0,173 | 0,072 | Isopenicillin-N synthase inhibitor                                              |
| 0,259 | 0,158 | Leukotriene-C4 synthase inhibitor                                               |
| 0,179 | 0,080 | Antirickettsial                                                                 |
| 0,198 | 0,098 | Alcohol dehydrogenase [NAD(P)+] inhibitor                                       |
| 0,174 | 0,074 | Gamma-butyrobetaine dioxygenase inhibitor                                       |
| 0,138 | 0,038 | Secretase stimulant                                                             |

|       |       |                                                                 |
|-------|-------|-----------------------------------------------------------------|
| 0,138 | 0,038 | Secretase alpha stimulant                                       |
| 0,236 | 0,137 | Antiinflammatory, intestinal                                    |
| 0,114 | 0,015 | Alpha,alpha-trehalose phosphorylase inhibitor                   |
| 0,252 | 0,153 | Glutathione thiolesterase inhibitor                             |
| 0,208 | 0,109 | Phosphatidylcholine-sterol O-acyltransferase inhibitor          |
| 0,129 | 0,030 | 3-Deoxy-8-phosphooctulonate synthase inhibitor                  |
| 0,107 | 0,008 | Prostaglandin agonist                                           |
| 0,153 | 0,055 | CDP-diacylglycerol-inositol 3-phosphatidyltransferase inhibitor |
| 0,252 | 0,155 | Gamma-guanidinobutyraldehyde dehydrogenase inhibitor            |
| 0,189 | 0,092 | CYP2A3 substrate                                                |
| 0,226 | 0,129 | Formate-dihydrofolate ligase inhibitor                          |
| 0,188 | 0,091 | Cyclopropane-fatty-acyl-phospholipid synthase inhibitor         |
| 0,263 | 0,166 | Nitrate reductase (cytochrome) inhibitor                        |
| 0,114 | 0,017 | Acetylcholine M3 receptor agonist                               |
| 0,118 | 0,022 | NAD+ nucleosidase inhibitor                                     |
| 0,176 | 0,079 | Vascular adhesion protein 1 inhibitor                           |
| 0,151 | 0,056 | Valine decarboxylase inhibitor                                  |
| 0,135 | 0,040 | Choline dehydrogenase inhibitor                                 |
| 0,168 | 0,073 | Lactate 2-monooxygenase inhibitor                               |
| 0,245 | 0,149 | Bilirubin oxidase inhibitor                                     |
| 0,171 | 0,076 | 4-Chlorobenzoyl-CoA dehalogenase inhibitor                      |
| 0,135 | 0,040 | Creatinase inhibitor                                            |
| 0,170 | 0,075 | Glyoxylate reductase (NADP+) inhibitor                          |
| 0,131 | 0,037 | 2-Dehydropantolactone reductase (A-specific) inhibitor          |
| 0,186 | 0,092 | Ubiquitin thiolesterase inhibitor                               |
| 0,105 | 0,011 | Thromboxane A2 antagonist                                       |
| 0,143 | 0,050 | Serine 3-dehydrogenase inhibitor                                |
| 0,163 | 0,069 | Choline-sulfatase inhibitor                                     |
| 0,108 | 0,015 | Androgen agonist                                                |
| 0,143 | 0,050 | Carboxymethylenebutenolidase inhibitor                          |
| 0,233 | 0,140 | Nitrite reductase [NAD(P)H] inhibitor                           |
| 0,208 | 0,115 | DNA-3-methyladenine glycosylase I inhibitor                     |
| 0,167 | 0,075 | N-acetylneuraminate 4-O-acetyltransferase inhibitor             |
| 0,227 | 0,135 | 4-Hydroxymandelate oxidase inhibitor                            |
| 0,173 | 0,081 | Antineoplastic (bladder cancer)                                 |
| 0,173 | 0,081 | Glutamate 5-kinase inhibitor                                    |
| 0,122 | 0,031 | Fructuronate reductase inhibitor                                |

|       |       |                                                                  |
|-------|-------|------------------------------------------------------------------|
| 0,122 | 0,031 | Tagaturonate reductase inhibitor                                 |
| 0,218 | 0,127 | AR expression inhibitor                                          |
| 0,187 | 0,096 | Antihematotoxic                                                  |
| 0,134 | 0,044 | D-arabinonolactone oxidase inhibitor                             |
| 0,211 | 0,120 | Leukotriene-B4 20-monooxygenase inhibitor                        |
| 0,118 | 0,027 | Homoserine O-succinyltransferase inhibitor                       |
| 0,123 | 0,033 | Beta-amylase inhibitor                                           |
| 0,220 | 0,130 | Antiviral (Poxvirus)                                             |
| 0,143 | 0,052 | Methionine decarboxylase inhibitor                               |
| 0,129 | 0,039 | Nicotinamide-nucleotide adenyltransferase inhibitor              |
| 0,228 | 0,138 | Arylsulfate sulfotransferase inhibitor                           |
| 0,117 | 0,027 | Amino-acid racemase inhibitor                                    |
| 0,212 | 0,123 | Cis-1,2-dihydro-1,2-dihydroxynaphthalene dehydrogenase inhibitor |
| 0,157 | 0,068 | Homoserine dehydrogenase inhibitor                               |
| 0,147 | 0,058 | Dihydrouracil dehydrogenase (NAD+) inhibitor                     |
| 0,127 | 0,038 | Glutamine-pyruvate transaminase inhibitor                        |
| 0,127 | 0,038 | Rhodopsin kinase inhibitor                                       |
| 0,092 | 0,003 | Corticosteroid-like                                              |
| 0,146 | 0,058 | Pectate lyase inhibitor                                          |
| 0,120 | 0,031 | Ribose-5-phosphate-ammonia ligase inhibitor                      |
| 0,181 | 0,092 | Serine-pyruvate transaminase inhibitor                           |
| 0,110 | 0,022 | Anticholelithogenic                                              |
| 0,157 | 0,069 | Geranylgeranyl-diphosphate geranylgeranyltransferase inhibitor   |
| 0,207 | 0,120 | Phosphatidylserine decarboxylase inhibitor                       |
| 0,124 | 0,037 | Deoxycytidine deaminase inhibitor                                |
| 0,146 | 0,059 | Antidiabetic (type 1)                                            |
| 0,104 | 0,017 | Arabinogalactan endo-1,4-beta-galactosidase inhibitor            |
| 0,155 | 0,068 | 3-Carboxyethylcatechol 2,3-dioxygenase inhibitor                 |
| 0,124 | 0,038 | Lysine decarboxylase inhibitor                                   |
| 0,155 | 0,070 | Methyltransferase substrate                                      |
| 0,154 | 0,069 | Glutamin-(asparagin-)ase inhibitor                               |
| 0,245 | 0,160 | Mitochondrial processing peptidase inhibitor                     |
| 0,125 | 0,040 | Valine dehydrogenase (NADP+) inhibitor                           |
| 0,140 | 0,055 | Urolithiasis treatment                                           |
| 0,161 | 0,076 | Sphinganine-1-phosphate aldolase inhibitor                       |
| 0,214 | 0,130 | Methylenetetrahydrofolate reductase (NADPH) inhibitor            |
| 0,259 | 0,175 | Amine dehydrogenase inhibitor                                    |

|       |       |                                                                         |
|-------|-------|-------------------------------------------------------------------------|
| 0,127 | 0,042 | Malonate-semialdehyde dehydrogenase inhibitor                           |
| 0,273 | 0,188 | Nicotine dehydrogenase inhibitor                                        |
| 0,196 | 0,112 | Uroporphyrinogen-III synthase inhibitor                                 |
| 0,138 | 0,054 | Glycosylphosphatidylinositol diacylglycerol-lyase inhibitor             |
| 0,107 | 0,022 | Alpha,alpha-trehalose phosphorylase (configuration-retaining) inhibitor |
| 0,102 | 0,018 | Alpha,alpha-phosphotrehalase inhibitor                                  |
| 0,165 | 0,081 | 3-Hydroxy-4-oxoquinoline 2,4-dioxygenase inhibitor                      |
| 0,173 | 0,089 | CYP4A2 substrate                                                        |
| 0,213 | 0,129 | Cell wall biosynthesis inhibitor                                        |
| 0,116 | 0,033 | Arabinose isomerase inhibitor                                           |
| 0,176 | 0,093 | UGT2B10 substrate                                                       |
| 0,095 | 0,012 | 17-Beta-hydroxysteroid dehydrogenase 1 inhibitor                        |
| 0,200 | 0,117 | Oxytocic                                                                |
| 0,093 | 0,010 | Glutamate (mGluR3) agonist                                              |
| 0,120 | 0,037 | Isomaltulose synthase inhibitor                                         |
| 0,130 | 0,047 | 1-Aminocyclopropane-1-carboxylate deaminase inhibitor                   |
| 0,252 | 0,169 | Menopausal disorders treatment                                          |
| 0,117 | 0,035 | Tyrosine-protein kinase TYRO 10 inhibitor                               |
| 0,251 | 0,170 | Polarisation stimulant                                                  |
| 0,125 | 0,044 | Deoxyribonuclease X inhibitor                                           |
| 0,218 | 0,137 | Antiviral (CMV)                                                         |
| 0,115 | 0,034 | Glycine receptor antagonist                                             |
| 0,112 | 0,032 | 2-Methyleneglutarate mutase inhibitor                                   |
| 0,236 | 0,156 | Antiviral (Adenovirus)                                                  |
| 0,133 | 0,053 | Phosphonoacetate hydrolase inhibitor                                    |
| 0,132 | 0,052 | Endo-1,4-beta-xylanase inhibitor                                        |
| 0,146 | 0,066 | Galactose oxidase inhibitor                                             |
| 0,174 | 0,094 | 2,6-Dihydroxypyridine 3-monooxygenase inhibitor                         |
| 0,198 | 0,119 | Coccolysin inhibitor                                                    |
| 0,183 | 0,104 | Bothrolysin inhibitor                                                   |
| 0,190 | 0,111 | Nardilysin inhibitor                                                    |
| 0,163 | 0,085 | UGT1A5 substrate                                                        |
| 0,156 | 0,078 | tRNA nucleotidyltransferase inhibitor                                   |
| 0,224 | 0,146 | HMOX1 expression enhancer                                               |
| 0,154 | 0,076 | Vomilenine glucosyltransferase inhibitor                                |
| 0,166 | 0,088 | Signal peptidase I inhibitor                                            |
| 0,204 | 0,126 | Acidifying agent non gastric                                            |

|       |       |                                                                                   |
|-------|-------|-----------------------------------------------------------------------------------|
| 0,199 | 0,121 | Anticarcinogenic                                                                  |
| 0,116 | 0,038 | Beta amyloid protein antagonist                                                   |
| 0,157 | 0,080 | Mitochondrial intermediate peptidase inhibitor                                    |
| 0,144 | 0,067 | Antibacterial, ophthalmic                                                         |
| 0,141 | 0,065 | 3-Oxoadipate enol-lactonase inhibitor                                             |
| 0,134 | 0,058 | CYP19 substrate                                                                   |
| 0,109 | 0,033 | Heme oxygenase inhibitor                                                          |
| 0,128 | 0,053 | Diacylglycerol kinase inhibitor                                                   |
| 0,154 | 0,078 | IgA-specific metalloendopeptidase inhibitor                                       |
| 0,137 | 0,061 | D-lactate dehydrogenase inhibitor                                                 |
| 0,154 | 0,078 | Tryptophan transaminase inhibitor                                                 |
| 0,169 | 0,094 | 2-Enoate reductase inhibitor                                                      |
| 0,123 | 0,049 | Fructose-2,6-bisphosphate 6-phosphatase inhibitor                                 |
| 0,135 | 0,060 | Glycogen (starch) synthase inhibitor                                              |
| 0,151 | 0,077 | SMN2 expression enhancer                                                          |
| 0,277 | 0,204 | HIF1A expression inhibitor                                                        |
| 0,125 | 0,052 | Antineoplastic, alkylator                                                         |
| 0,167 | 0,094 | CYP4F2 substrate                                                                  |
| 0,103 | 0,030 | 11-Cis-retinyl-palmitate hydrolase inhibitor                                      |
| 0,133 | 0,060 | 2-Oxoisovalerate dehydrogenase (acylating) inhibitor                              |
| 0,113 | 0,041 | Ketohexokinase inhibitor                                                          |
| 0,120 | 0,047 | Sorbose dehydrogenase inhibitor                                                   |
| 0,173 | 0,101 | Choleretic                                                                        |
| 0,128 | 0,056 | Lactaldehyde reductase (NADPH) inhibitor                                          |
| 0,108 | 0,036 | Phosphatidylglycerol-membrane-oligosaccharide glycerophosphotransferase inhibitor |
| 0,221 | 0,150 | Antiprotozoal (Coccidial)                                                         |
| 0,119 | 0,047 | Gluconate dehydratase inhibitor                                                   |
| 0,189 | 0,117 | Tankyrase inhibitor                                                               |
| 0,218 | 0,147 | ICAM1 expression inhibitor                                                        |
| 0,160 | 0,089 | N-acetyl-gamma-glutamyl-phosphate reductase inhibitor                             |
| 0,128 | 0,057 | NAD+ kinase inhibitor                                                             |
| 0,120 | 0,049 | Cytochrome-c3 hydrogenase inhibitor                                               |
| 0,109 | 0,038 | CYP4F substrate                                                                   |
| 0,109 | 0,038 | Beta-N-acetylgalactosaminidase inhibitor                                          |
| 0,108 | 0,038 | Ribonuclease U2 inhibitor                                                         |
| 0,202 | 0,133 | Indanol dehydrogenase inhibitor                                                   |
| 0,118 | 0,049 | Aerobactin synthase inhibitor                                                     |

|       |       |                                                                                            |
|-------|-------|--------------------------------------------------------------------------------------------|
| 0,214 | 0,145 | Cytochrome-b5 reductase inhibitor                                                          |
| 0,163 | 0,094 | Phosphatidylglycerophosphatase inhibitor                                                   |
| 0,125 | 0,056 | Beta-mannosidase inhibitor                                                                 |
| 0,149 | 0,080 | 3'-Nucleotidase inhibitor                                                                  |
| 0,216 | 0,148 | Alkane 1-monooxygenase inhibitor                                                           |
| 0,114 | 0,046 | 2-Aminoethylphosphonate-pyruvate transaminase inhibitor                                    |
| 0,139 | 0,070 | Antineoplastic (gastric cancer)                                                            |
| 0,150 | 0,082 | Allantoin racemase inhibitor                                                               |
| 0,123 | 0,055 | Glutamate release inhibitor                                                                |
| 0,193 | 0,125 | Antibacterial                                                                              |
| 0,159 | 0,091 | Rhamnulose-1-phosphate aldolase inhibitor                                                  |
| 0,157 | 0,090 | 2,4-Diaminopentanoate dehydrogenase inhibitor                                              |
| 0,157 | 0,090 | 3-Hydroxybutyryl-CoA dehydrogenase inhibitor                                               |
| 0,157 | 0,090 | Lysine 6-dehydrogenase inhibitor                                                           |
| 0,125 | 0,058 | 2-Aminoadipate transaminase inhibitor                                                      |
| 0,090 | 0,023 | Chitin deacetylase inhibitor                                                               |
| 0,177 | 0,110 | Hyponitrite reductase inhibitor                                                            |
| 0,111 | 0,044 | 1,5-Anhydro-D-fructose reductase inhibitor                                                 |
| 0,142 | 0,075 | Dry eye syndrome treatment                                                                 |
| 0,110 | 0,043 | 2-Hydroxy-3-oxopropionate reductase inhibitor                                              |
| 0,137 | 0,070 | UGT1A10 substrate                                                                          |
| 0,119 | 0,053 | Omega-amidase inhibitor                                                                    |
| 0,110 | 0,044 | Bis(5'-adenosyl)-triphosphatase inhibitor                                                  |
| 0,128 | 0,061 | UDP-N-acetylglucosamine-dolichyl-phosphate N-acetylglucosaminophosphotransferase inhibitor |
| 0,182 | 0,116 | Bontoxilysin inhibitor                                                                     |
| 0,165 | 0,099 | Phenylalanine(histidine) transaminase inhibitor                                            |
| 0,142 | 0,076 | UGT2B18 substrate                                                                          |
| 0,125 | 0,060 | Fructose-2,6-bisphosphate 2-phosphatase inhibitor                                          |
| 0,096 | 0,030 | 2-Dehydro-3-deoxy-phosphogluconate aldolase inhibitor                                      |
| 0,112 | 0,047 | Glycerophosphocholine cholinephosphodiesterase inhibitor                                   |
| 0,178 | 0,113 | Carnitinamidase inhibitor                                                                  |
| 0,158 | 0,093 | Dolichol kinase inhibitor                                                                  |
| 0,076 | 0,011 | Microtubule stabilization                                                                  |
| 0,085 | 0,020 | NMDA receptor polyamine site agonist                                                       |
| 0,101 | 0,036 | L-fuconate dehydratase inhibitor                                                           |
| 0,136 | 0,072 | Iron-cytochrome-c reductase inhibitor                                                      |
| 0,145 | 0,081 | Melanin inhibitor                                                                          |

|       |       |                                                             |
|-------|-------|-------------------------------------------------------------|
| 0,133 | 0,069 | Diisopropyl-fluorophosphatase inhibitor                     |
| 0,178 | 0,114 | Methanol dehydrogenase inhibitor                            |
| 0,286 | 0,222 | TP53 expression enhancer                                    |
| 0,106 | 0,042 | Gluconokinase inhibitor                                     |
| 0,145 | 0,082 | Granzyme A inhibitor                                        |
| 0,094 | 0,031 | (S)-2-Methylmalate dehydratase inhibitor                    |
| 0,113 | 0,049 | Homocysteine desulphydrase inhibitor                        |
| 0,106 | 0,043 | Proline dehydrogenase inhibitor                             |
| 0,138 | 0,076 | Phosphoinositide phospholipase C inhibitor                  |
| 0,069 | 0,006 | Protein phosphatase 2A inhibitor                            |
| 0,117 | 0,055 | Lysozyme inhibitor                                          |
| 0,136 | 0,074 | Cellulase inhibitor                                         |
| 0,210 | 0,149 | DNA-(apurinic or apyrimidinic site) lyase inhibitor         |
| 0,203 | 0,141 | 4-Nitrophenylphosphatase inhibitor                          |
| 0,107 | 0,046 | Dichloromuconate cycloisomerase inhibitor                   |
| 0,202 | 0,141 | Myosin ATPase inhibitor                                     |
| 0,094 | 0,034 | Alpha-L-fucosidase inhibitor                                |
| 0,131 | 0,070 | Allophanate hydrolase inhibitor                             |
| 0,130 | 0,070 | Selenocysteine lyase inhibitor                              |
| 0,163 | 0,103 | Gallate decarboxylase inhibitor                             |
| 0,136 | 0,076 | Cerebroside-sulfatase inhibitor                             |
| 0,212 | 0,152 | Venom exonuclease inhibitor                                 |
| 0,161 | 0,101 | Metallo-carboxypeptidase D inhibitor                        |
| 0,147 | 0,088 | Pyruvate dehydrogenase (cytochrome) inhibitor               |
| 0,147 | 0,088 | Trans-2-enoyl-CoA reductase (NAD+) inhibitor                |
| 0,089 | 0,030 | CYP4F12 substrate                                           |
| 0,212 | 0,152 | Urethanase inhibitor                                        |
| 0,135 | 0,076 | GABA inverse agonist                                        |
| 0,135 | 0,076 | GABA A inverse agonist                                      |
| 0,101 | 0,042 | 3-Oxosteroid 1-dehydrogenase inhibitor                      |
| 0,109 | 0,050 | Globoside alpha-N-acetylgalactosaminyltransferase inhibitor |
| 0,113 | 0,054 | NMDA receptor polyamine site antagonist                     |
| 0,066 | 0,007 | Antimitotic, Podophyllotoxin-like                           |
| 0,146 | 0,088 | N6-methyl-lysine oxidase inhibitor                          |
| 0,064 | 0,006 | Dipeptidyl peptidase IV inhibitor                           |
| 0,102 | 0,044 | 2-Dehydro-3-deoxy-L-arabinonate dehydratase inhibitor       |
| 0,128 | 0,070 | Haloacetate dehalogenase inhibitor                          |

|       |       |                                                                                  |
|-------|-------|----------------------------------------------------------------------------------|
| 0,128 | 0,070 | Prepilin peptidase inhibitor                                                     |
| 0,085 | 0,027 | Oxaloacetate tautomerase inhibitor                                               |
| 0,104 | 0,046 | Beta-D-fucosidase inhibitor                                                      |
| 0,128 | 0,070 | Agmatinase inhibitor                                                             |
| 0,139 | 0,081 | Gly-X carboxypeptidase inhibitor                                                 |
| 0,083 | 0,026 | Deoxyhypusine synthase inhibitor                                                 |
| 0,082 | 0,025 | 3-Alpha-hydroxysteroid dehydrogenase (B-specific) inhibitor                      |
| 0,094 | 0,037 | Epoxide hydrolase substrate                                                      |
| 0,091 | 0,034 | Alpha-1,6-mannosyl-glycoprotein 6-beta-N-acetylglucosaminyltransferase inhibitor |
| 0,135 | 0,078 | Lipotropic                                                                       |
| 0,155 | 0,098 | Homoaconitate hydratase inhibitor                                                |
| 0,155 | 0,098 | 6-Carboxyhexanoate-CoA ligase inhibitor                                          |
| 0,155 | 0,098 | Biotin-CoA ligase inhibitor                                                      |
| 0,155 | 0,098 | Triacetate-lactonase inhibitor                                                   |
| 0,091 | 0,034 | Alpha-L-rhamnosidase inhibitor                                                   |
| 0,067 | 0,011 | 11-Beta-hydroxysteroid dehydrogenase inhibitor                                   |
| 0,121 | 0,065 | Poly(ADP-ribose) glycohydrolase inhibitor                                        |
| 0,126 | 0,070 | CYP26A substrate                                                                 |
| 0,132 | 0,076 | Valine-tRNA ligase inhibitor                                                     |
| 0,188 | 0,132 | UGT2B4 substrate                                                                 |
| 0,110 | 0,054 | Poly(3-hydroxybutyrate) depolymerase inhibitor                                   |
| 0,271 | 0,215 | 2-Hydroxyquinoline 8-monooxygenase inhibitor                                     |
| 0,115 | 0,060 | Guanidinodeoxy-scylo-inositol-4-phosphatase inhibitor                            |
| 0,157 | 0,102 | Camphor 1,2-monooxygenase inhibitor                                              |
| 0,128 | 0,073 | Galactose 1-dehydrogenase (NADP+) inhibitor                                      |
| 0,128 | 0,073 | Beta-alanine-pyruvate transaminase inhibitor                                     |
| 0,147 | 0,092 | UGT2B9 substrate                                                                 |
| 0,111 | 0,056 | Heparan-alpha-glucosaminide N-acetyltransferase inhibitor                        |
| 0,133 | 0,078 | CYP4B substrate                                                                  |
| 0,148 | 0,094 | Carnosine synthase inhibitor                                                     |
| 0,121 | 0,066 | Mevalonate kinase inhibitor                                                      |
| 0,217 | 0,163 | Analgesic stimulant                                                              |
| 0,095 | 0,042 | Galactosylgalactosylglucosylceramidase inhibitor                                 |
| 0,062 | 0,009 | CYP4F8 substrate                                                                 |
| 0,067 | 0,013 | Actin depolymerization stimulant                                                 |
| 0,112 | 0,059 | Galactoside 2-alpha-L-fucosyltransferase inhibitor                               |
| 0,077 | 0,023 | ATP diphosphatase inhibitor                                                      |

|       |       |                                                            |
|-------|-------|------------------------------------------------------------|
| 0,200 | 0,147 | Cyclic AMP modulator                                       |
| 0,070 | 0,017 | Sucrose-phosphate phosphatase inhibitor                    |
| 0,111 | 0,059 | Chondroitin 6-sulfotransferase inhibitor                   |
| 0,138 | 0,085 | 3-Aminobutyryl-CoA ammonia-lyase inhibitor                 |
| 0,248 | 0,196 | Spermidine dehydrogenase inhibitor                         |
| 0,071 | 0,019 | Amylosucrase inhibitor                                     |
| 0,064 | 0,012 | 11-Beta-hydroxysteroid dehydrogenase 1 inhibitor           |
| 0,138 | 0,086 | Penicillopepsin inhibitor                                  |
| 0,098 | 0,046 | Contraceptive male                                         |
| 0,094 | 0,041 | Homospermidine synthase inhibitor                          |
| 0,174 | 0,122 | Acyl-CoA oxidase inhibitor                                 |
| 0,165 | 0,113 | Alanine-tRNA ligase inhibitor                              |
| 0,142 | 0,090 | Tetrahydroxynaphthalene reductase inhibitor                |
| 0,114 | 0,063 | UGT2B11 substrate                                          |
| 0,079 | 0,028 | Alpha-mannosidase inhibitor                                |
| 0,125 | 0,074 | Biotin carboxylase inhibitor                               |
| 0,133 | 0,083 | Aldehyde ferredoxin oxidoreductase inhibitor               |
| 0,118 | 0,068 | ATP adenylyltransferase inhibitor                          |
| 0,179 | 0,128 | Peroxidase substrate                                       |
| 0,137 | 0,087 | 2-Acylglycerol O-acyltransferase inhibitor                 |
| 0,096 | 0,045 | 3-Isopropylmalate dehydrogenase inhibitor                  |
| 0,110 | 0,060 | Pantothenase inhibitor                                     |
| 0,125 | 0,075 | CYP4B1 substrate                                           |
| 0,103 | 0,053 | Cell wall synthesis inhibitor                              |
| 0,129 | 0,079 | Alpha-Methylacyl-CoA racemase inhibitor                    |
| 0,124 | 0,075 | 8-Amino-7-oxononanoate synthase inhibitor                  |
| 0,173 | 0,123 | Retinal dehydrogenase inhibitor                            |
| 0,192 | 0,143 | X-methyl-His dipeptidase inhibitor                         |
| 0,122 | 0,073 | Excitatory amino acid transporter EAAC1 inhibitor          |
| 0,104 | 0,055 | Glyceraldehyde-3-phosphate dehydrogenase (NADP+) inhibitor |
| 0,175 | 0,126 | Histidinol dehydrogenase inhibitor                         |
| 0,087 | 0,038 | Xylan 1,4-beta-xylosidase inhibitor                        |
| 0,241 | 0,193 | CYP19A1 expression inhibitor                               |
| 0,124 | 0,076 | Thiamine-phosphate kinase inhibitor                        |
| 0,161 | 0,113 | Urate-ribonucleotide phosphorylase inhibitor               |
| 0,161 | 0,113 | Nicotinic alpha4beta2 receptor antagonist                  |
| 0,121 | 0,073 | O-acetylhomoserine aminocarboxypropyltransferase inhibitor |

|       |       |                                                                |
|-------|-------|----------------------------------------------------------------|
| 0,152 | 0,105 | Aldehyde dehydrogenase 2 substrate                             |
| 0,081 | 0,034 | Peptidoglycan beta-N-acetylmuramidase inhibitor                |
| 0,085 | 0,038 | Steroid sulfotransferase inhibitor                             |
| 0,073 | 0,027 | 1-Alkyl-2-acetyl glycerol O-acyltransferase inhibitor          |
| 0,119 | 0,073 | NAD(P)+ transhydrogenase (B-specific) inhibitor                |
| 0,107 | 0,061 | Leucine transaminase inhibitor                                 |
| 0,144 | 0,098 | 6-Pyruvoyltetrahydropterin synthase inhibitor                  |
| 0,116 | 0,070 | Glycoprotein 3-alpha-L-fucosyltransferase inhibitor            |
| 0,084 | 0,038 | Gynecological disorders treatment                              |
| 0,080 | 0,034 | CYP2A13 substrate                                              |
| 0,132 | 0,087 | Chitin synthase inhibitor                                      |
| 0,099 | 0,054 | Phosphofructokinase-1 inhibitor                                |
| 0,103 | 0,058 | D-glutamate oxidase inhibitor                                  |
| 0,123 | 0,078 | Aminocarboxymuconate-semialdehyde decarboxylase inhibitor      |
| 0,124 | 0,079 | Phenylpyruvate decarboxylase inhibitor                         |
| 0,223 | 0,178 | Antineoplastic (solid tumors)                                  |
| 0,150 | 0,105 | Penicillin amidase inhibitor                                   |
| 0,136 | 0,092 | Glucosyl transferase inhibitor                                 |
| 0,141 | 0,097 | Lipoxygenase substrate                                         |
| 0,136 | 0,091 | Lombricine kinase inhibitor                                    |
| 0,099 | 0,055 | Monocarboxylic acid transporter 1 inhibitor                    |
| 0,099 | 0,055 | Monocarboxylic acid transporter inhibitor                      |
| 0,091 | 0,046 | [hydroxymethylglutaryl-CoA reductase (NADPH)] kinase inhibitor |
| 0,167 | 0,122 | Nucleoside oxidase (H2O2-forming) inhibitor                    |
| 0,115 | 0,071 | Neuropsin inhibitor                                            |
| 0,116 | 0,072 | Isovaleryl-CoA dehydrogenase inhibitor                         |
| 0,134 | 0,089 | Phenylacetate-CoA ligase inhibitor                             |
| 0,091 | 0,047 | Phosphoenolpyruvate carboxykinase (diphosphate) inhibitor      |
| 0,122 | 0,078 | (S)-2-hydroxy-acid oxidase inhibitor                           |
| 0,250 | 0,206 | Antihypoxic                                                    |
| 0,144 | 0,100 | 4-Hydroxyglutamate transaminase inhibitor                      |
| 0,093 | 0,049 | Cysteine transaminase inhibitor                                |
| 0,143 | 0,100 | Creatinine deaminase inhibitor                                 |
| 0,149 | 0,106 | Glutathione peroxidase inhibitor                               |
| 0,083 | 0,040 | mRNA (guanine-N7-)-methyltransferase inhibitor                 |
| 0,228 | 0,185 | Antihelmintic (Nematodes)                                      |
| 0,064 | 0,021 | Biotin-[methylmalonyl-CoA-carboxytransferase] ligase inhibitor |

|       |       |                                                         |
|-------|-------|---------------------------------------------------------|
| 0,082 | 0,039 | 4a-Hydroxytetrahydrobiopterin dehydratase inhibitor     |
| 0,077 | 0,034 | Aldose 1-epimerase inhibitor                            |
| 0,145 | 0,103 | Acaricide                                               |
| 0,117 | 0,075 | Glucan endo-1,3-alpha-glucosidase inhibitor             |
| 0,116 | 0,073 | DNA directed DNA polymerase inhibitor                   |
| 0,225 | 0,184 | CYP3A3 substrate                                        |
| 0,100 | 0,058 | Isocitrate dehydrogenase (NAD+) inhibitor               |
| 0,178 | 0,136 | Aromatic-hydroxylamine O-acetyltransferase inhibitor    |
| 0,150 | 0,109 | Antihelmintic (Fasciola)                                |
| 0,071 | 0,029 | CYP24 inhibitor                                         |
| 0,138 | 0,097 | Pyridoxine 4-oxidase inhibitor                          |
| 0,138 | 0,096 | Allyl-alcohol dehydrogenase inhibitor                   |
| 0,089 | 0,047 | Ribulose-bisphosphate carboxylase inhibitor             |
| 0,144 | 0,103 | Adenylate cyclase stimulant                             |
| 0,114 | 0,073 | Iduronate-2-sulfatase inhibitor                         |
| 0,087 | 0,046 | Malate dehydrogenase (NADP+) inhibitor                  |
| 0,168 | 0,127 | Antihypotensive                                         |
| 0,102 | 0,062 | Leucine-tRNA ligase inhibitor                           |
| 0,109 | 0,069 | L-lysine 6-transaminase inhibitor                       |
| 0,140 | 0,100 | 2,4-Dichlorophenol 6-monooxygenase inhibitor            |
| 0,103 | 0,063 | Aspartate-ammonia ligase (ADP-forming) inhibitor        |
| 0,137 | 0,097 | Aspartoacylase inhibitor                                |
| 0,079 | 0,039 | Aspartate 1-decarboxylase inhibitor                     |
| 0,256 | 0,216 | Preneoplastic conditions treatment                      |
| 0,079 | 0,039 | Lactate-malate transhydrogenase inhibitor               |
| 0,144 | 0,105 | Acetylornithine deacetylase inhibitor                   |
| 0,065 | 0,026 | Glucan 1,4-alpha-glucosidase inhibitor                  |
| 0,160 | 0,121 | Sulfite reductase inhibitor                             |
| 0,051 | 0,013 | Sucrose phosphorylase inhibitor                         |
| 0,064 | 0,025 | Prostaglandin-I synthase inhibitor                      |
| 0,113 | 0,074 | N4-(beta-N-acetylglucosaminyl)-L-asparaginase inhibitor |
| 0,089 | 0,051 | Cellobiose phosphorylase inhibitor                      |
| 0,212 | 0,174 | Tyrosine 3 hydroxylase inhibitor                        |
| 0,065 | 0,027 | UGT2B4E substrate                                       |
| 0,065 | 0,027 | UGT2B23 substrate                                       |
| 0,065 | 0,027 | UGT2B19 substrate                                       |
| 0,065 | 0,027 | UGT2B30 substrate                                       |

|       |       |                                                            |
|-------|-------|------------------------------------------------------------|
| 0,065 | 0,027 | UGT2B4D substrate                                          |
| 0,100 | 0,061 | Adenylylsulphatase inhibitor                               |
| 0,088 | 0,050 | L-lysine oxidase inhibitor                                 |
| 0,168 | 0,130 | Diamine N-acetyltransferase inhibitor                      |
| 0,158 | 0,120 | Dihydroxy-acid dehydratase inhibitor                       |
| 0,111 | 0,073 | D-2-hydroxy-acid dehydrogenase inhibitor                   |
| 0,089 | 0,051 | Retinol O-fatty-acyltransferase inhibitor                  |
| 0,053 | 0,016 | Dipeptidyl peptidase II inhibitor                          |
| 0,079 | 0,042 | CYP2C2 substrate                                           |
| 0,063 | 0,026 | Aromatase inhibitor                                        |
| 0,146 | 0,109 | Hydroxymethylglutaryl-CoA lyase inhibitor                  |
| 0,146 | 0,110 | Glycine C-acetyltransferase inhibitor                      |
| 0,101 | 0,065 | Aminoacylase inhibitor                                     |
| 0,112 | 0,076 | Anabolic                                                   |
| 0,109 | 0,073 | Ribonuclease inhibitor                                     |
| 0,173 | 0,137 | Prolyl aminopeptidase inhibitor                            |
| 0,055 | 0,019 | Methylaspartate mutase inhibitor                           |
| 0,127 | 0,091 | Aldehyde dehydrogenase (NADP+) inhibitor                   |
| 0,188 | 0,153 | Gingipain K inhibitor                                      |
| 0,082 | 0,047 | Cushing's syndrome treatment                               |
| 0,135 | 0,100 | Protein synthesis inhibitor                                |
| 0,061 | 0,026 | Dipeptidyl peptidase inhibitor                             |
| 0,063 | 0,028 | Glucan 1,3-alpha-glucosidase inhibitor                     |
| 0,184 | 0,149 | Glutaminy-peptide cyclotransferase inhibitor               |
| 0,075 | 0,041 | 3-Dehydroquinase synthase inhibitor                        |
| 0,059 | 0,025 | CYP17 substrate                                            |
| 0,114 | 0,080 | Pantoate 4-dehydrogenase inhibitor                         |
| 0,120 | 0,086 | 2-Oxoglutarate decarboxylase inhibitor                     |
| 0,078 | 0,044 | Glutaminyl-tRNA synthase (glutamine-hydrolysing) inhibitor |
| 0,091 | 0,057 | UDP-N-acetylglucosamine diphosphorylase inhibitor          |
| 0,160 | 0,126 | Opine dehydrogenase inhibitor                              |
| 0,071 | 0,037 | [acetyl-CoA carboxylase] kinase inhibitor                  |
| 0,258 | 0,224 | Sulfur reductase inhibitor                                 |
| 0,056 | 0,022 | D(-)-tartrate dehydratase inhibitor                        |
| 0,085 | 0,051 | 2-Methylcitrate synthase inhibitor                         |
| 0,063 | 0,030 | D-lactate-2-sulfatase inhibitor                            |
| 0,138 | 0,105 | CDP-4-dehydro-6-deoxyglucose reductase inhibitor           |

|       |       |                                                                               |
|-------|-------|-------------------------------------------------------------------------------|
| 0,153 | 0,120 | Indoleacetaldoxime dehydratase inhibitor                                      |
| 0,052 | 0,018 | Orotidylate decarboxylase inhibitor                                           |
| 0,053 | 0,019 | NADPH oxidoreductase inhibitor                                                |
| 0,092 | 0,059 | Galactosylceramide sulfotransferase inhibitor                                 |
| 0,114 | 0,081 | Glutathione S-transferase substrate                                           |
| 0,083 | 0,050 | Argininosuccinate lyase inhibitor                                             |
| 0,104 | 0,072 | L-galactonolactone oxidase inhibitor                                          |
| 0,105 | 0,073 | Aldehyde dehydrogenase [NAD(P)+] inhibitor                                    |
| 0,139 | 0,107 | Polynucleotide 5'-hydroxy-kinase inhibitor                                    |
| 0,085 | 0,053 | Deoxycytidine kinase inhibitor                                                |
| 0,103 | 0,072 | Pyrimidine-deoxynucleoside 2'-dioxygenase inhibitor                           |
| 0,108 | 0,076 | NADH dehydrogenase inhibitor                                                  |
| 0,089 | 0,057 | Squalene-hopene cyclase inhibitor                                             |
| 0,059 | 0,028 | Na <sup>+</sup> K <sup>+</sup> transporting ATPase inhibitor                  |
| 0,088 | 0,057 | 5-Oxoprolinase (ATP-hydrolysing) inhibitor                                    |
| 0,106 | 0,075 | D-lactate dehydrogenase (cytochrome) inhibitor                                |
| 0,102 | 0,071 | Cholate-CoA ligase inhibitor                                                  |
| 0,087 | 0,056 | Saccharopine dehydrogenase (NAD <sup>+</sup> , L-glutamate-forming) inhibitor |
| 0,061 | 0,030 | 3'(2'),5'-Bisphosphate nucleotidase inhibitor                                 |
| 0,138 | 0,107 | Cytochrome-b5 reductase substrate                                             |
| 0,134 | 0,104 | Histamine agonist                                                             |
| 0,049 | 0,018 | Tartrate decarboxylase inhibitor                                              |
| 0,035 | 0,004 | Prostaglandin EP2 agonist                                                     |
| 0,097 | 0,067 | tRNA (cytosine-5-)-methyltransferase inhibitor                                |
| 0,090 | 0,059 | D-proline reductase (dithiol) inhibitor                                       |
| 0,124 | 0,094 | HIV-2 reverse transcriptase inhibitor                                         |
| 0,153 | 0,123 | Antineoplastic (thyroid cancer)                                               |
| 0,065 | 0,035 | Mannosidase inhibitor                                                         |
| 0,064 | 0,034 | Acidifying agent gastric                                                      |
| 0,136 | 0,107 | Benzoylformate decarboxylase inhibitor                                        |
| 0,167 | 0,137 | Ferredoxin hydrogenase inhibitor                                              |
| 0,074 | 0,045 | 3(or 17)alpha-hydroxysteroid dehydrogenase inhibitor                          |
| 0,072 | 0,042 | L-lactate dehydrogenase (cytochrome) inhibitor                                |
| 0,148 | 0,119 | Stromelysin 2 inhibitor                                                       |
| 0,072 | 0,043 | Lactaldehyde dehydrogenase inhibitor                                          |
| 0,128 | 0,099 | Oligopeptidase B inhibitor                                                    |
| 0,137 | 0,108 | N-methyl-2-oxoglutaramate hydrolase inhibitor                                 |

|       |       |                                                                  |
|-------|-------|------------------------------------------------------------------|
| 0,094 | 0,066 | Aspartate transaminase inhibitor                                 |
| 0,109 | 0,081 | Carnitine 3-dehydrogenase inhibitor                              |
| 0,066 | 0,038 | Androgen antagonist                                              |
| 0,107 | 0,078 | CYP19 inhibitor                                                  |
| 0,106 | 0,078 | Aspartate kinase inhibitor                                       |
| 0,139 | 0,111 | Inorganic diphosphatase inhibitor                                |
| 0,087 | 0,059 | Deoxyribonuclease (pyrimidine dimer) inhibitor                   |
| 0,058 | 0,031 | CYP24 substrate                                                  |
| 0,125 | 0,098 | Aminopeptidase Y inhibitor                                       |
| 0,082 | 0,054 | Alpha,alpha-trehalose-phosphate synthase (UDP-forming) inhibitor |
| 0,073 | 0,046 | 4-Hydroxy-4-methyl-2-oxoglutarate aldolase inhibitor             |
| 0,134 | 0,107 | Acetate kinase inhibitor                                         |
| 0,101 | 0,074 | Diacylglycerol cholinephosphotransferase inhibitor               |
| 0,062 | 0,035 | Prolyl endopeptidase inhibitor                                   |
| 0,075 | 0,049 | 3-Dehydroquinase dehydratase inhibitor                           |
| 0,076 | 0,050 | Glycerophosphocholine phosphodiesterase inhibitor                |
| 0,060 | 0,033 | D-Serine ammonia-lyase inhibitor                                 |
| 0,075 | 0,049 | ATP deaminase inhibitor                                          |
| 0,113 | 0,087 | Ethanolaminephosphotransferase inhibitor                         |
| 0,125 | 0,100 | Peptide-tryptophan 2,3-dioxygenase inhibitor                     |
| 0,076 | 0,051 | Aspartate-semialdehyde dehydrogenase inhibitor                   |
| 0,078 | 0,053 | Cyanate hydratase inhibitor                                      |
| 0,083 | 0,058 | Scyllo-inosamine-4-phosphate amidinotransferase inhibitor        |
| 0,106 | 0,081 | Sulfate adenylyltransferase (ADP) inhibitor                      |
| 0,124 | 0,099 | Ferrochelataze inhibitor                                         |
| 0,100 | 0,075 | Glycerol-3-phosphate O-acyltransferase inhibitor                 |
| 0,178 | 0,153 | Sigma receptor agonist                                           |
| 0,091 | 0,066 | Mannonate dehydratase inhibitor                                  |
| 0,099 | 0,074 | DNA-3-methyladenine glycosylase II inhibitor                     |
| 0,160 | 0,136 | Indolepyruvate C-methyltransferase inhibitor                     |
| 0,176 | 0,152 | Acetylserotonin O-methyltransferase inhibitor                    |
| 0,122 | 0,098 | Peptidylamidoglycolate lyase inhibitor                           |
| 0,103 | 0,079 | Cysteine desulfurase inhibitor                                   |
| 0,047 | 0,023 | Electron transport complex I inhibitor                           |
| 0,180 | 0,156 | CYP2B2 substrate                                                 |
| 0,124 | 0,100 | Plasmanylethanolamine desaturase inhibitor                       |
| 0,058 | 0,035 | Hydroxylysine kinase inhibitor                                   |

|       |       |                                                                       |
|-------|-------|-----------------------------------------------------------------------|
| 0,027 | 0,005 | NADH oxidase inhibitor                                                |
| 0,138 | 0,116 | 3-Demethylubiquinone-9 3-O-methyltransferase inhibitor                |
| 0,045 | 0,022 | Glucocorticoid antagonist                                             |
| 0,077 | 0,054 | Polyamine biosynthesis inhibitor                                      |
| 0,058 | 0,036 | Biotin-[propionyl-CoA-carboxylase (ATP-hydrolysing)] ligase inhibitor |
| 0,094 | 0,072 | Allantoicase inhibitor                                                |
| 0,083 | 0,061 | Inositol-polyphosphate 5-phosphatase inhibitor                        |
| 0,054 | 0,032 | Propionate CoA-transferase inhibitor                                  |
| 0,248 | 0,226 | Insulin promoter                                                      |
| 0,069 | 0,048 | Glutathione reductase stimulant                                       |
| 0,069 | 0,048 | Glutathione reductase (NADPH) stimulant                               |
| 0,234 | 0,213 | N-hydroxyarylamine O-acetyltransferase inhibitor                      |
| 0,066 | 0,045 | Dipeptidyl peptidase I inhibitor                                      |
| 0,078 | 0,057 | 2-Oxoaldehyde dehydrogenase (NAD <sup>+</sup> ) inhibitor             |
| 0,084 | 0,063 | CYP26 substrate                                                       |
| 0,108 | 0,087 | 5 Hydroxytryptamine 4A antagonist                                     |
| 0,180 | 0,159 | Methane monooxygenase inhibitor                                       |
| 0,071 | 0,051 | 6-Phosphofructo-2-kinase inhibitor                                    |
| 0,126 | 0,105 | Brachyurin inhibitor                                                  |
| 0,060 | 0,040 | Deoxyadenosine kinase inhibitor                                       |
| 0,195 | 0,175 | FMO1 substrate                                                        |
| 0,037 | 0,017 | Homoisocitrate dehydrogenase inhibitor                                |
| 0,058 | 0,038 | Glycine N-choloyltransferase inhibitor                                |
| 0,083 | 0,064 | UDP-N-acetylglucosamine 2-epimerase inhibitor                         |
| 0,092 | 0,073 | Dihydrouracil oxidase inhibitor                                       |
| 0,056 | 0,037 | CMP-KDO synthase inhibitor                                            |
| 0,095 | 0,075 | Glutamate N-acetyltransferase inhibitor                               |
| 0,131 | 0,112 | Arylacetonitrilase inhibitor                                          |
| 0,036 | 0,017 | Transaldolase inhibitor                                               |
| 0,141 | 0,122 | Guanidinoacetate kinase inhibitor                                     |
| 0,175 | 0,157 | Cathepsin T inhibitor                                                 |
| 0,206 | 0,187 | 4-Hydroxyproline epimerase inhibitor                                  |
| 0,169 | 0,151 | Endopeptidase La inhibitor                                            |
| 0,089 | 0,071 | Thiamine-phosphate diphosphorylase inhibitor                          |
| 0,092 | 0,074 | UDP-glucose 4-epimerase inhibitor                                     |
| 0,093 | 0,075 | Chloramphenicol O-acetyltransferase inhibitor                         |
| 0,072 | 0,054 | Phosphoribulokinase inhibitor                                         |

|       |       |                                                                                             |
|-------|-------|---------------------------------------------------------------------------------------------|
| 0,072 | 0,054 | N-acetylglucosaminyldiphosphoundecaprenol N-acetyl-beta-D-mannosaminyltransferase inhibitor |
| 0,096 | 0,078 | Site-specific DNA-methyltransferase (adenine-specific) inhibitor                            |
| 0,071 | 0,054 | Dihydrolipoamide S-acetyltransferase inhibitor                                              |
| 0,059 | 0,042 | Acetylcholine muscarinic agonist                                                            |
| 0,060 | 0,042 | Alpha-1,6-mannosyl-glycoprotein 2-beta-N-acetylglucosaminyltransferase inhibitor            |
| 0,112 | 0,094 | Cathepsin H inhibitor                                                                       |
| 0,066 | 0,048 | Corticotropin releasing factor antagonist                                                   |
| 0,044 | 0,026 | Androst-4-ene-3,17-dione monooxygenase inhibitor                                            |
| 0,090 | 0,073 | Cytosole dipeptidase inhibitor                                                              |
| 0,111 | 0,094 | Sulfur dioxygenase inhibitor                                                                |
| 0,109 | 0,092 | Protein-tyrosine sulfotransferase inhibitor                                                 |
| 0,030 | 0,014 | Phenylethanolamine N methyltransferase inhibitor                                            |
| 0,129 | 0,113 | Hydroxymethylbilane synthase inhibitor                                                      |
| 0,114 | 0,098 | Endoglycosylceramidase inhibitor                                                            |
| 0,123 | 0,107 | 3,4-Dihydroxy-9,10-secoandrosta-1,3,5(10)-triene-9,17-dione 4,5-dioxygenase inhibitor       |
| 0,051 | 0,035 | HCV NS3/NS4A protease inhibitor                                                             |
| 0,068 | 0,052 | UGT2B7Y substrate                                                                           |
| 0,068 | 0,052 | UGT2B7H substrate                                                                           |
| 0,129 | 0,113 | Restless leg syndrome treatment                                                             |
| 0,132 | 0,116 | CYP2D1 substrate                                                                            |
| 0,094 | 0,078 | Glycoprotein-fucosylgalactoside alpha-N-acetylgalactosaminyltransferase inhibitor           |
| 0,119 | 0,103 | (R,R)-butanediol dehydrogenase inhibitor                                                    |
| 0,048 | 0,032 | Thymidine kinase 1 inhibitor                                                                |
| 0,071 | 0,056 | Hydroperoxide dehydratase inhibitor                                                         |
| 0,074 | 0,059 | S-methyl-5-thioribose kinase inhibitor                                                      |
| 0,085 | 0,070 | Benzaldehyde dehydrogenase (NAD+) inhibitor                                                 |
| 0,081 | 0,066 | Acetoacetate decarboxylase inhibitor                                                        |
| 0,215 | 0,200 | Retinoic acid metabolism inhibitor                                                          |
| 0,084 | 0,069 | Necroptosis inhibitor                                                                       |
| 0,115 | 0,100 | Cysteine synthase inhibitor                                                                 |
| 0,085 | 0,070 | Glycerol dehydratase inhibitor                                                              |
| 0,079 | 0,064 | Guanidinopropionase inhibitor                                                               |
| 0,048 | 0,034 | CYP3A11 substrate                                                                           |
| 0,112 | 0,098 | Antitussive, narcotic                                                                       |
| 0,089 | 0,075 | Ribitol 2-dehydrogenase inhibitor                                                           |
| 0,076 | 0,062 | Cystathionine beta-lyase inhibitor                                                          |

|       |       |                                                                  |
|-------|-------|------------------------------------------------------------------|
| 0,063 | 0,049 | Glycerol kinase inhibitor                                        |
| 0,095 | 0,081 | Mallyl-CoA lyase inhibitor                                       |
| 0,067 | 0,053 | L-aminoadipate-semialdehyde dehydrogenase inhibitor              |
| 0,095 | 0,081 | Glucose 1-dehydrogenase inhibitor                                |
| 0,121 | 0,107 | Adenylate kinase inhibitor                                       |
| 0,119 | 0,105 | N-Acyl-D-amino-acid deacylase inhibitor                          |
| 0,069 | 0,055 | Serine-tRNA ligase inhibitor                                     |
| 0,104 | 0,090 | Contraceptive                                                    |
| 0,066 | 0,052 | Glutamate (mGluR8) agonist                                       |
| 0,105 | 0,091 | Transcription factor NF kappa B inhibitor                        |
| 0,060 | 0,047 | Thioether S-methyltransferase inhibitor                          |
| 0,115 | 0,102 | Candidapepsin inhibitor                                          |
| 0,111 | 0,098 | Cancer procoagulant inhibitor                                    |
| 0,054 | 0,041 | Assemblin inhibitor                                              |
| 0,029 | 0,016 | Hexokinase stimulant                                             |
| 0,058 | 0,046 | Quinate 5-dehydrogenase inhibitor                                |
| 0,150 | 0,138 | Aminomuconate-semialdehyde dehydrogenase inhibitor               |
| 0,086 | 0,074 | Phosphatidate cytidyltransferase inhibitor                       |
| 0,218 | 0,206 | Loop diuretic                                                    |
| 0,132 | 0,120 | Tyrosine kinase stimulant                                        |
| 0,035 | 0,024 | Membrane-oligosaccharide glycerophosphotransferase inhibitor     |
| 0,075 | 0,064 | (R)-aminopropanol dehydrogenase inhibitor                        |
| 0,121 | 0,109 | (S)-3-hydroxyacid ester dehydrogenase inhibitor                  |
| 0,132 | 0,121 | Threonine aldolase inhibitor                                     |
| 0,019 | 0,008 | Glutamate (mGluR2) antagonist                                    |
| 0,217 | 0,206 | Superoxide dismutase inhibitor                                   |
| 0,088 | 0,077 | Glycerol-3-phosphate dehydrogenase (NAD+) inhibitor              |
| 0,112 | 0,101 | Galactoside O-acetyltransferase inhibitor                        |
| 0,090 | 0,080 | Adenosylmethionine-8-amino-7-oxononanoate transaminase inhibitor |
| 0,105 | 0,094 | Pyruvate dehydrogenase inhibitor                                 |
| 0,082 | 0,072 | Alpha,alpha-trehalase inhibitor                                  |
| 0,062 | 0,052 | Formimidoylglutamase inhibitor                                   |
| 0,070 | 0,060 | N-acetylglucosamine-6-phosphate deacetylase inhibitor            |
| 0,074 | 0,064 | Neolactotetraosylceramide alpha-2,3-sialyltransferase inhibitor  |
| 0,038 | 0,028 | Dichloromethane dehalogenase inhibitor                           |
| 0,063 | 0,053 | UDP-glucose 6-dehydrogenase inhibitor                            |
| 0,038 | 0,028 | Isopentenyl-diphosphate DELTA-isomerase inhibitor                |

|       |       |                                                                                 |
|-------|-------|---------------------------------------------------------------------------------|
| 0,019 | 0,010 | Gestagen-like                                                                   |
| 0,117 | 0,108 | Liver X receptor antagonist                                                     |
| 0,045 | 0,036 | N-acetylglucosaminyldiphosphodolichol N-acetylglucosaminyltransferase inhibitor |
| 0,187 | 0,178 | Chloride channel activator                                                      |
| 0,085 | 0,076 | Triose-phosphate isomerase inhibitor                                            |
| 0,181 | 0,171 | Monodehydroascorbate reductase (NADH) inhibitor                                 |
| 0,098 | 0,089 | Decylcitrate synthase inhibitor                                                 |
| 0,036 | 0,028 | Phosphoglycerate phosphatase inhibitor                                          |
| 0,187 | 0,178 | NADPH-ferrihemoprotein reductase inhibitor                                      |
| 0,058 | 0,050 | Beta-glucosidase inhibitor                                                      |
| 0,172 | 0,164 | L-threonine 3-dehydrogenase inhibitor                                           |
| 0,165 | 0,157 | Prostaglandin-E2 9-reductase inhibitor                                          |
| 0,085 | 0,077 | Malate dehydrogenase (oxaloacetate-decarboxylating) inhibitor                   |
| 0,166 | 0,158 | Immunostimulant                                                                 |
| 0,074 | 0,066 | Succinate-hydroxymethylglutarate CoA-transferase inhibitor                      |
| 0,092 | 0,085 | Aspartyl aminopeptidase inhibitor                                               |
| 0,031 | 0,023 | Nociceptin (N/OFQ) receptor antagonist                                          |
| 0,107 | 0,100 | Acylglycerone-phosphate reductase inhibitor                                     |
| 0,112 | 0,104 | 3-Hydroxyphenylacetate 6-hydroxylase inhibitor                                  |
| 0,097 | 0,090 | Squalene epoxidase inhibitor                                                    |
| 0,016 | 0,009 | Ether-a-go-go potassium channel blocker                                         |
| 0,016 | 0,009 | Ether-a-go-go potassium channel 1 blocker                                       |
| 0,081 | 0,074 | Astringent                                                                      |
| 0,101 | 0,094 | Skin whitener                                                                   |
| 0,115 | 0,109 | Tryptophanyl aminopeptidase inhibitor                                           |
| 0,026 | 0,020 | Alpha glucosidase I inhibitor                                                   |
| 0,022 | 0,015 | 11-Beta-hydroxysteroid dehydrogenase 2 inhibitor                                |
| 0,033 | 0,026 | Glucose-6-phosphate isomerase inhibitor                                         |
| 0,091 | 0,084 | Cerevisin inhibitor                                                             |
| 0,123 | 0,116 | Pyruvate carboxylase inhibitor                                                  |
| 0,152 | 0,146 | Pitrilysin inhibitor                                                            |
| 0,144 | 0,138 | Thermitase inhibitor                                                            |
| 0,080 | 0,073 | CTP synthase inhibitor                                                          |
| 0,061 | 0,055 | Isocitrate dehydrogenase (NADP+) inhibitor                                      |
| 0,088 | 0,082 | Alanine transaminase inhibitor                                                  |
| 0,047 | 0,041 | Prostacyclin agonist                                                            |
| 0,089 | 0,083 | Diiodophenylpyruvate reductase inhibitor                                        |

|       |       |                                                                                 |
|-------|-------|---------------------------------------------------------------------------------|
| 0,066 | 0,060 | Maleate hydratase inhibitor                                                     |
| 0,172 | 0,166 | ATP phosphoribosyltransferase inhibitor                                         |
| 0,077 | 0,071 | D-malate dehydrogenase (decarboxylating) inhibitor                              |
| 0,107 | 0,101 | Gingipain R inhibitor                                                           |
| 0,054 | 0,048 | Plus-end-directed kinesin ATPase inhibitor                                      |
| 0,049 | 0,044 | Beta galactosidase inhibitor                                                    |
| 0,040 | 0,035 | Thymidine-triphosphatase inhibitor                                              |
| 0,031 | 0,026 | Sodium/glucose cotransporter 1 inhibitor                                        |
| 0,027 | 0,022 | Phosphopyruvate hydratase inhibitor                                             |
| 0,089 | 0,084 | D-Ornithine 4,5-aminomutase inhibitor                                           |
| 0,049 | 0,045 | Uracil phosphoribosyltransferase inhibitor                                      |
| 0,105 | 0,101 | Inositol 1,4,5-trisphosphate 3-kinase inhibitor                                 |
| 0,072 | 0,068 | tRNA (guanine-N2-)-methyltransferase inhibitor                                  |
| 0,014 | 0,010 | Kanamycin kinase inhibitor                                                      |
| 0,135 | 0,131 | Cyclopentanone monooxygenase inhibitor                                          |
| 0,019 | 0,015 | Glutamate (mGluR3) antagonist                                                   |
| 0,057 | 0,054 | Beta-1,4-mannosyl-glycoprotein 4-beta-N-acetylglucosaminyltransferase inhibitor |
| 0,073 | 0,069 | CMP-N-acylneuraminate phosphodiesterase inhibitor                               |
| 0,046 | 0,043 | Anhydrotetracycline monooxygenase inhibitor                                     |
| 0,075 | 0,071 | SULT2A1 substrate                                                               |
| 0,072 | 0,068 | Muconate cycloisomerase inhibitor                                               |
| 0,091 | 0,088 | Carboxylesterase inhibitor                                                      |
| 0,016 | 0,012 | Antiprotozoal activity enhancer                                                 |
| 0,050 | 0,047 | Carbamoyl-serine ammonia-lyase inhibitor                                        |
| 0,074 | 0,072 | Diguanidinobutanase inhibitor                                                   |
| 0,069 | 0,066 | ACK1 kinase inhibitor                                                           |
| 0,087 | 0,084 | Ornithine-oxo-acid transaminase inhibitor                                       |
| 0,109 | 0,107 | Homogentisate 1,2-dioxygenase inhibitor                                         |
| 0,012 | 0,009 | Actin polymerization inhibitor                                                  |
| 0,033 | 0,031 | Endo-beta-N-acetylglucosaminidase inhibitor                                     |
| 0,068 | 0,065 | Ribonucleoside diphosphate reductase inhibitor                                  |
| 0,105 | 0,102 | Arylalkyl acylamidase inhibitor                                                 |
| 0,091 | 0,089 | D-cysteine desulfhydrase inhibitor                                              |
| 0,067 | 0,065 | Oligo-1,6-glucosidase inhibitor                                                 |
| 0,092 | 0,090 | Glucosamine-1-phosphate N-acetyltransferase inhibitor                           |
| 0,140 | 0,138 | CTGF expression inhibitor                                                       |
| 0,095 | 0,093 | Glucosamine-6-phosphate deaminase inhibitor                                     |

|       |       |                                                               |
|-------|-------|---------------------------------------------------------------|
| 0,038 | 0,036 | 2-Ethylmalate synthase inhibitor                              |
| 0,071 | 0,070 | [myelin basic protein]-arginine N-methyltransferase inhibitor |
| 0,123 | 0,122 | UGT2B7 substrate                                              |
| 0,097 | 0,095 | CYP3C substrate                                               |
| 0,066 | 0,065 | D-alanine transaminase inhibitor                              |
| 0,123 | 0,122 | Tryptophan alpha,beta-oxidase inhibitor                       |
| 0,126 | 0,125 | Heat shock protein agonist                                    |
| 0,020 | 0,019 | Cortisone alpha-reductase inhibitor                           |
| 0,023 | 0,022 | Tartrate dehydrogenase inhibitor                              |
| 0,109 | 0,108 | Acid-sensing ion channel blocker                              |
| 0,088 | 0,088 | 2-Nitrophenol 2-monooxygenase inhibitor                       |
| 0,079 | 0,079 | Capillary fragility treatment                                 |
| 0,125 | 0,125 | 4-Chlorophenylacetate 3,4-dioxygenase inhibitor               |
| 0,116 | 0,115 | 4-Hydroxybenzoate nonaprenyltransferase inhibitor             |
| 0,123 | 0,123 | Picornain 3C inhibitor                                        |
| 0,047 | 0,047 | Glutamate (mGluR1) agonist                                    |
| 0,195 | 0,194 | Farnesoid X receptor antagonist                               |
| 0,057 | 0,057 | GMP synthase inhibitor                                        |

## Complex 5 All

☒ All
 ☐ Pa>Pi
 ☐ Pa>0,3
 ☐ Pa>0,7

| Pa    | Pi    | Activity                                            |
|-------|-------|-----------------------------------------------------|
| 0,847 | 0,018 | Phobic disorders treatment                          |
| 0,829 | 0,009 | Antineoplastic                                      |
| 0,832 | 0,018 | Testosterone 17beta-dehydrogenase (NADP+) inhibitor |
| 0,816 | 0,032 | CYP2C12 substrate                                   |
| 0,786 | 0,015 | Acylcarnitine hydrolase inhibitor                   |
| 0,790 | 0,023 | Saccharopepsin inhibitor                            |
| 0,790 | 0,023 | Chymosin inhibitor                                  |
| 0,790 | 0,023 | Acrocylindropepsin inhibitor                        |
| 0,774 | 0,024 | Antiseborrheic                                      |
| 0,754 | 0,014 | Alkylacetylglycerophosphatase inhibitor             |
| 0,757 | 0,024 | Alkenylglycerophosphocholine hydrolase inhibitor    |

|       |       |                                                                      |
|-------|-------|----------------------------------------------------------------------|
| 0,745 | 0,013 | JAK2 expression inhibitor                                            |
| 0,733 | 0,003 | Antineoplastic (non-Hodgkin's lymphoma)                              |
| 0,746 | 0,018 | Beta-adrenergic receptor kinase inhibitor                            |
| 0,746 | 0,018 | G-protein-coupled receptor kinase inhibitor                          |
| 0,753 | 0,030 | Antieczematic                                                        |
| 0,727 | 0,004 | Imidazoline receptor agonist                                         |
| 0,764 | 0,044 | Aspulvinone dimethylallyltransferase inhibitor                       |
| 0,730 | 0,018 | Lysase inhibitor                                                     |
| 0,717 | 0,008 | Glucan 1,4-alpha-maltotriohydrolase inhibitor                        |
| 0,744 | 0,036 | CYP2J substrate                                                      |
| 0,702 | 0,013 | 27-Hydroxycholesterol 7alpha-monooxygenase inhibitor                 |
| 0,729 | 0,058 | Ubiquinol-cytochrome-c reductase inhibitor                           |
| 0,703 | 0,032 | CYP2J2 substrate                                                     |
| 0,701 | 0,034 | Nicotinic alpha6beta3beta4alpha5 receptor antagonist                 |
| 0,679 | 0,012 | Vasoprotector                                                        |
| 0,665 | 0,008 | CYP2A4 substrate                                                     |
| 0,686 | 0,036 | Sugar-phosphatase inhibitor                                          |
| 0,673 | 0,029 | 5-O-(4-coumaroyl)-D-quinic acid 3'-monooxygenase inhibitor           |
| 0,667 | 0,024 | HIF1A expression inhibitor                                           |
| 0,637 | 0,003 | Dementia treatment                                                   |
| 0,692 | 0,060 | Mucosubstances protector                                             |
| 0,655 | 0,024 | Phosphatase inhibitor                                                |
| 0,637 | 0,011 | Cardiovascular analeptic                                             |
| 0,633 | 0,008 | Dolichyl-diphosphooligosaccharide-protein glycotransferase inhibitor |
| 0,628 | 0,005 | Antineoplastic (ovarian cancer)                                      |
| 0,625 | 0,009 | H <sup>+</sup> -exporting ATPase inhibitor                           |
| 0,651 | 0,036 | TP53 expression enhancer                                             |
| 0,668 | 0,062 | CDP-glycerol glycerophosphotransferase inhibitor                     |
| 0,637 | 0,032 | Ribulose-phosphate 3-epimerase inhibitor                             |
| 0,619 | 0,021 | Respiratory analeptic                                                |
| 0,620 | 0,023 | CYP3A2 substrate                                                     |
| 0,654 | 0,060 | Membrane permeability inhibitor                                      |
| 0,646 | 0,054 | Polyporopepsin inhibitor                                             |
| 0,601 | 0,011 | Platelet adhesion inhibitor                                          |
| 0,601 | 0,012 | Carminative                                                          |
| 0,615 | 0,035 | Antidyskinetic                                                       |
| 0,606 | 0,026 | Apoptosis agonist                                                    |

|       |       |                                                       |
|-------|-------|-------------------------------------------------------|
| 0,598 | 0,022 | Vasodilator, peripheral                               |
| 0,596 | 0,020 | CYP3A1 substrate                                      |
| 0,588 | 0,014 | CYP3A3 substrate                                      |
| 0,598 | 0,025 | CYP3A5 substrate                                      |
| 0,632 | 0,061 | Antineurotic                                          |
| 0,601 | 0,030 | Cytoprotectant                                        |
| 0,593 | 0,025 | Acetylcholine neuromuscular blocking agent            |
| 0,582 | 0,016 | Neurotransmitter antagonist                           |
| 0,579 | 0,015 | Antiviral (Influenza)                                 |
| 0,572 | 0,008 | Antimetastatic                                        |
| 0,623 | 0,059 | CYP2H substrate                                       |
| 0,608 | 0,046 | Nicotinic alpha2beta2 receptor antagonist             |
| 0,570 | 0,013 | Antineoplastic (breast cancer)                        |
| 0,584 | 0,027 | Membrane integrity antagonist                         |
| 0,574 | 0,021 | CYP3A4 inducer                                        |
| 0,557 | 0,007 | Imidazoline I1 receptor agonist                       |
| 0,571 | 0,025 | Ovulation inhibitor                                   |
| 0,577 | 0,033 | Glucan endo-1,3-beta-D-glucosidase inhibitor          |
| 0,565 | 0,021 | CYP3A inducer                                         |
| 0,552 | 0,013 | Peptidoglycan glycosyltransferase inhibitor           |
| 0,556 | 0,021 | CYP2A2 substrate                                      |
| 0,563 | 0,028 | Antiviral (Picornavirus)                              |
| 0,543 | 0,009 | Antineoplastic (solid tumors)                         |
| 0,556 | 0,022 | CYP2A1 substrate                                      |
| 0,555 | 0,021 | Antipruritic, allergic                                |
| 0,565 | 0,036 | Gastrin inhibitor                                     |
| 0,557 | 0,037 | Feruloyl esterase inhibitor                           |
| 0,545 | 0,028 | Linoleate diol synthase inhibitor                     |
| 0,538 | 0,026 | Alkenylglycerophosphoethanolamine hydrolase inhibitor |
| 0,531 | 0,020 | Cyclic AMP agonist                                    |
| 0,521 | 0,011 | Myc inhibitor                                         |
| 0,512 | 0,005 | Antineoplastic (brain cancer)                         |
| 0,519 | 0,014 | Anthelmintic (Nematodes)                              |
| 0,519 | 0,014 | Caspase 8 stimulant                                   |
| 0,512 | 0,009 | Endothelial growth factor antagonist                  |
| 0,530 | 0,032 | CYP2C8 substrate                                      |
| 0,511 | 0,013 | Antineoplastic (lung cancer)                          |

|       |       |                                                                                                 |
|-------|-------|-------------------------------------------------------------------------------------------------|
| 0,521 | 0,025 | Antinociceptive                                                                                 |
| 0,505 | 0,011 | CYP3A7 substrate                                                                                |
| 0,510 | 0,018 | CYP2D2 inhibitor                                                                                |
| 0,543 | 0,053 | CYP3A4 substrate                                                                                |
| 0,492 | 0,005 | Antineoplastic (pancreatic cancer)                                                              |
| 0,500 | 0,015 | Membrane permeability enhancer                                                                  |
| 0,519 | 0,034 | Cholesterol antagonist                                                                          |
| 0,535 | 0,052 | CYP3A substrate                                                                                 |
| 0,511 | 0,030 | Analeptic                                                                                       |
| 0,518 | 0,039 | Immunosuppressant                                                                               |
| 0,483 | 0,005 | Antineoplastic (small cell lung cancer)                                                         |
| 0,509 | 0,031 | CYP2B5 substrate                                                                                |
| 0,562 | 0,084 | Membrane integrity agonist                                                                      |
| 0,530 | 0,053 | Platelet aggregation stimulant                                                                  |
| 0,513 | 0,039 | Adenomatous polyposis treatment                                                                 |
| 0,521 | 0,051 | UDP-N-acetylglucosamine 4-epimerase inhibitor                                                   |
| 0,493 | 0,023 | Acetylgalactosaminyl-O-glycosyl-glycoprotein beta-1,3-N-acetylglucosaminyltransferase inhibitor |
| 0,495 | 0,026 | Steroid N-acetylglucosaminyltransferase inhibitor                                               |
| 0,498 | 0,030 | TNF expression inhibitor                                                                        |
| 0,485 | 0,018 | CYP2A11 substrate                                                                               |
| 0,481 | 0,017 | CYP2C9 inducer                                                                                  |
| 0,477 | 0,012 | Prostate cancer treatment                                                                       |
| 0,467 | 0,004 | Vascular dementia treatment                                                                     |
| 0,508 | 0,047 | Alopecia treatment                                                                              |
| 0,493 | 0,032 | Histamine release stimulant                                                                     |
| 0,485 | 0,030 | Caspase 3 stimulant                                                                             |
| 0,479 | 0,026 | CYP2D15 substrate                                                                               |
| 0,470 | 0,019 | P-glycoprotein substrate                                                                        |
| 0,515 | 0,065 | Complement factor D inhibitor                                                                   |
| 0,471 | 0,026 | CYP17 inhibitor                                                                                 |
| 0,483 | 0,038 | Antipruritic                                                                                    |
| 0,471 | 0,031 | AR expression inhibitor                                                                         |
| 0,470 | 0,033 | Cyclohexanone monooxygenase inhibitor                                                           |
| 0,489 | 0,055 | Glucan endo-1,6-beta-glucosidase inhibitor                                                      |
| 0,481 | 0,046 | Ecdysone 20-monooxygenase inhibitor                                                             |
| 0,502 | 0,068 | Protein-disulfide reductase (glutathione) inhibitor                                             |
| 0,441 | 0,010 | Endo-1,3(4)-beta-glucanase inhibitor                                                            |

|       |       |                                                 |
|-------|-------|-------------------------------------------------|
| 0,460 | 0,029 | Gonadotropin antagonist                         |
| 0,516 | 0,086 | Glutamyl endopeptidase II inhibitor             |
| 0,513 | 0,084 | Fusarinine-C ornithinesterase inhibitor         |
| 0,466 | 0,039 | Antiviral (Rhinovirus)                          |
| 0,491 | 0,065 | General pump inhibitor                          |
| 0,464 | 0,039 | Mannan endo-1,4-beta-mannosidase inhibitor      |
| 0,452 | 0,028 | Alcohol dehydrogenase (acceptor) inhibitor      |
| 0,436 | 0,014 | Pediculicide                                    |
| 0,448 | 0,026 | N-acylmannosamine kinase inhibitor              |
| 0,454 | 0,032 | Antiprotozoal (Leishmania)                      |
| 0,440 | 0,022 | DELTA14-sterol reductase inhibitor              |
| 0,433 | 0,016 | CYP2B11 substrate                               |
| 0,456 | 0,040 | Antisecretoric                                  |
| 0,426 | 0,010 | Antineoplastic (melanoma)                       |
| 0,497 | 0,082 | Nicotinic alpha4beta4 receptor agonist          |
| 0,452 | 0,037 | MMP9 expression inhibitor                       |
| 0,496 | 0,081 | Calcium channel (voltage-sensitive) activator   |
| 0,476 | 0,062 | Chloride peroxidase inhibitor                   |
| 0,437 | 0,023 | RELA expression inhibitor                       |
| 0,432 | 0,018 | Vanilloid 1 agonist                             |
| 0,445 | 0,034 | Rubredoxin-NAD <sup>+</sup> reductase inhibitor |
| 0,461 | 0,051 | Exoribonuclease II inhibitor                    |
| 0,452 | 0,042 | Apyrase inhibitor                               |
| 0,446 | 0,037 | Pullulanase inhibitor                           |
| 0,426 | 0,017 | Oxidizing agent                                 |
| 0,462 | 0,054 | Erythropoiesis stimulant                        |
| 0,439 | 0,031 | Leukopoiesis inhibitor                          |
| 0,481 | 0,074 | NADPH peroxidase inhibitor                      |
| 0,437 | 0,030 | Dextranase inhibitor                            |
| 0,427 | 0,022 | CYP7 inhibitor                                  |
| 0,414 | 0,009 | CYP2D1 substrate                                |
| 0,411 | 0,008 | Nicotinic alpha4beta2 receptor antagonist       |
| 0,425 | 0,023 | CYP2A5 substrate                                |
| 0,417 | 0,015 | Antiprotozoal (Coccidial)                       |
| 0,410 | 0,010 | Steroid synthesis inhibitor                     |
| 0,436 | 0,038 | Bilirubin oxidase inhibitor                     |
| 0,479 | 0,082 | Oxidoreductase inhibitor                        |

|       |       |                                                                             |
|-------|-------|-----------------------------------------------------------------------------|
| 0,432 | 0,036 | Menopausal disorders treatment                                              |
| 0,396 | 0,005 | Alpha-pinene-oxide decyclase inhibitor                                      |
| 0,407 | 0,017 | RNA directed DNA polymerase inhibitor                                       |
| 0,428 | 0,043 | Glyoxylate reductase inhibitor                                              |
| 0,464 | 0,081 | Macrophage colony stimulating factor agonist                                |
| 0,394 | 0,016 | CYP2B10 substrate                                                           |
| 0,402 | 0,027 | Hydroxylamine reductase (NADH) inhibitor                                    |
| 0,380 | 0,006 | Antineoplastic (renal cancer)                                               |
| 0,482 | 0,109 | Kidney function stimulant                                                   |
| 0,412 | 0,041 | Aspergillopepsin I inhibitor                                                |
| 0,427 | 0,058 | Polarisation stimulant                                                      |
| 0,391 | 0,023 | CDP-diacylglycerol-glycerol-3-phosphate 3-phosphatidyltransferase inhibitor |
| 0,409 | 0,043 | Phosphoinositide 5-phosphatase inhibitor                                    |
| 0,401 | 0,035 | Antiviral (Herpes)                                                          |
| 0,407 | 0,041 | Cytostatic                                                                  |
| 0,382 | 0,017 | Opioid dependency treatment                                                 |
| 0,489 | 0,125 | Fibrinolytic                                                                |
| 0,408 | 0,044 | Glycerol-3-phosphate oxidase inhibitor                                      |
| 0,381 | 0,017 | Antipruritic, non-allergic                                                  |
| 0,408 | 0,045 | GABA aminotransferase inhibitor                                             |
| 0,405 | 0,044 | EIF4E expression inhibitor                                                  |
| 0,373 | 0,013 | Glucan 1,6-alpha-glucosidase inhibitor                                      |
| 0,435 | 0,076 | GST A substrate                                                             |
| 0,375 | 0,017 | Alkylglycerophosphoethanolamine phosphodiesterase inhibitor                 |
| 0,373 | 0,017 | Acaricide                                                                   |
| 0,430 | 0,075 | 1,4-Lactonase inhibitor                                                     |
| 0,364 | 0,010 | Microtubule formation inhibitor                                             |
| 0,401 | 0,050 | All-trans-retinyl-palmitate hydrolase inhibitor                             |
| 0,374 | 0,023 | CYP2C6 substrate                                                            |
| 0,400 | 0,050 | Antifungal                                                                  |
| 0,403 | 0,053 | Cytochrome P450 stimulant                                                   |
| 0,376 | 0,026 | Protein-Npi-phosphohistidine-sugar phosphotransferase inhibitor             |
| 0,364 | 0,015 | Maltose-transporting ATPase inhibitor                                       |
| 0,376 | 0,026 | GST M substrate                                                             |
| 0,445 | 0,097 | Chlordecone reductase inhibitor                                             |
| 0,381 | 0,033 | UGT2B4 substrate                                                            |
| 0,359 | 0,012 | MAP kinase kinase 4 inhibitor                                               |

|       |       |                                                                                           |
|-------|-------|-------------------------------------------------------------------------------------------|
| 0,363 | 0,016 | UGT2B17 substrate                                                                         |
| 0,403 | 0,056 | Na <sup>+</sup> -transporting two-sector ATPase inhibitor                                 |
| 0,424 | 0,078 | Leukopoiesis stimulant                                                                    |
| 0,369 | 0,023 | Antitussive                                                                               |
| 0,384 | 0,038 | Phosphatidylinositol diacylglycerol-lyase inhibitor                                       |
| 0,414 | 0,070 | 4-Nitrophenol 2-monooxygenase inhibitor                                                   |
| 0,404 | 0,061 | Formaldehyde transketolase inhibitor                                                      |
| 0,411 | 0,069 | CYP2C substrate                                                                           |
| 0,396 | 0,054 | Simian immunodeficiency virus proteinase inhibitor                                        |
| 0,407 | 0,065 | Aldehyde oxidase inhibitor                                                                |
| 0,382 | 0,041 | Albendazole monooxygenase inhibitor                                                       |
| 0,412 | 0,073 | Trimethylamine-oxide aldolase inhibitor                                                   |
| 0,366 | 0,027 | RNA synthesis inhibitor                                                                   |
| 0,355 | 0,016 | Antiperistaltic                                                                           |
| 0,407 | 0,070 | Lipoprotein lipase inhibitor                                                              |
| 0,397 | 0,060 | HMOX1 expression enhancer                                                                 |
| 0,371 | 0,035 | CYP2G1 substrate                                                                          |
| 0,393 | 0,058 | N-acetylneuraminate 7-O(or 9-O)-acetyltransferase inhibitor                               |
| 0,390 | 0,057 | Antimyopathies                                                                            |
| 0,421 | 0,089 | Limulus clotting factor B inhibitor                                                       |
| 0,343 | 0,012 | Hydroxysteroid dehydrogenase inhibitor                                                    |
| 0,343 | 0,013 | Cycloartenol synthase inhibitor                                                           |
| 0,370 | 0,041 | Undecaprenyldiphospho-muramoylpentapeptide beta-N-acetylglucosaminyltransferase inhibitor |
| 0,353 | 0,025 | Sclerosant                                                                                |
| 0,375 | 0,049 | CYP2C11 substrate                                                                         |
| 0,332 | 0,006 | Retinyl-palmitate esterase inhibitor                                                      |
| 0,383 | 0,058 | Prostaglandin-E2 9-reductase inhibitor                                                    |
| 0,357 | 0,031 | Sorbitol-6-phosphate 2-dehydrogenase inhibitor                                            |
| 0,412 | 0,087 | Lipid metabolism regulator                                                                |
| 0,378 | 0,055 | Malate oxidase inhibitor                                                                  |
| 0,448 | 0,125 | Pseudolysin inhibitor                                                                     |
| 0,398 | 0,075 | Beta glucuronidase inhibitor                                                              |
| 0,334 | 0,012 | Antineoplastic (liver cancer)                                                             |
| 0,410 | 0,090 | Venombin AB inhibitor                                                                     |
| 0,338 | 0,017 | Antineoplastic (non-small cell lung cancer)                                               |
| 0,360 | 0,040 | Hepatoprotectant                                                                          |
| 0,365 | 0,045 | Mannose isomerase inhibitor                                                               |

|       |       |                                                              |
|-------|-------|--------------------------------------------------------------|
| 0,387 | 0,070 | 3-Hydroxybenzoate 6-monooxygenase inhibitor                  |
| 0,356 | 0,040 | Opioid kappa 3 receptor antagonist                           |
| 0,341 | 0,026 | Thiamine-triphosphatase inhibitor                            |
| 0,439 | 0,126 | Glycosylphosphatidylinositol phospholipase D inhibitor       |
| 0,368 | 0,055 | Sulfite dehydrogenase inhibitor                              |
| 0,354 | 0,040 | Fructan beta-fructosidase inhibitor                          |
| 0,395 | 0,083 | Pterin deaminase inhibitor                                   |
| 0,342 | 0,030 | DNA ligase (ATP) inhibitor                                   |
| 0,332 | 0,020 | Antimitotic                                                  |
| 0,341 | 0,033 | N-(long-chain-acyl)ethanolamine deacylase inhibitor          |
| 0,333 | 0,025 | Vitamin-K-epoxide reductase (warfarin-insensitive) inhibitor |
| 0,381 | 0,073 | Insulin promoter                                             |
| 0,370 | 0,063 | Plastoquinol-plastocyanin reductase inhibitor                |
| 0,312 | 0,005 | Nitric oxide scavenger                                       |
| 0,350 | 0,043 | Cyclomaltodextrinase inhibitor                               |
| 0,395 | 0,088 | Lysine 2,3-aminomutase inhibitor                             |
| 0,331 | 0,026 | UGT2B28 substrate                                            |
| 0,395 | 0,089 | Pin1 inhibitor                                               |
| 0,329 | 0,024 | Fumarate reductase (NADH) inhibitor                          |
| 0,354 | 0,049 | 4-Coumarate-CoA ligase inhibitor                             |
| 0,375 | 0,070 | CYP2D6 substrate                                             |
| 0,372 | 0,068 | CYP2D substrate                                              |
| 0,369 | 0,066 | Transcription factor stimulant                               |
| 0,369 | 0,066 | Transcription factor NF kappa B stimulant                    |
| 0,335 | 0,032 | Hyaluronic acid agonist                                      |
| 0,385 | 0,083 | Hydrogen dehydrogenase inhibitor                             |
| 0,338 | 0,037 | DNA polymerase I inhibitor                                   |
| 0,412 | 0,111 | Electron-transferring-flavoprotein dehydrogenase inhibitor   |
| 0,371 | 0,070 | L-glutamate oxidase inhibitor                                |
| 0,321 | 0,020 | Sterol 3-beta-glucosyltransferase inhibitor                  |
| 0,463 | 0,162 | Nootropic                                                    |
| 0,311 | 0,012 | UGT1A5 substrate                                             |
| 0,305 | 0,006 | Antineoplastic (gastric cancer)                              |
| 0,343 | 0,044 | Glycerol-3-phosphate dehydrogenase inhibitor                 |
| 0,338 | 0,041 | Clavamate synthase inhibitor                                 |
| 0,339 | 0,043 | Gestagen antagonist                                          |
| 0,305 | 0,009 | Deoxyribonuclease I inhibitor                                |

|       |       |                                                                |
|-------|-------|----------------------------------------------------------------|
| 0,361 | 0,066 | CYP2A substrate                                                |
| 0,310 | 0,015 | Insecticide                                                    |
| 0,344 | 0,049 | Eye irritation, inactive                                       |
| 0,300 | 0,006 | Antineoplastic (thyroid cancer)                                |
| 0,384 | 0,090 | Fibrinogen receptor antagonist                                 |
| 0,324 | 0,031 | CYP2A3 substrate                                               |
| 0,307 | 0,014 | Ligase inhibitor                                               |
| 0,391 | 0,099 | Phosphatidylcholine-retinol O-acyltransferase inhibitor        |
| 0,319 | 0,027 | Dopamine release stimulant                                     |
| 0,339 | 0,047 | Hematopoietic inhibitor                                        |
| 0,323 | 0,032 | Calcium channel activator                                      |
| 0,300 | 0,009 | Antineoplastic, alkylator                                      |
| 0,330 | 0,039 | Proliferative diseases treatment                               |
| 0,346 | 0,055 | D-lactaldehyde dehydrogenase inhibitor                         |
| 0,328 | 0,038 | Shikimate O-hydroxycinnamoyltransferase inhibitor              |
| 0,344 | 0,054 | Formate-dihydrofolate ligase inhibitor                         |
| 0,317 | 0,029 | Licheninase inhibitor                                          |
| 0,301 | 0,015 | Antineoplastic (endocrine cancer)                              |
| 0,315 | 0,028 | Protein synthesis inhibitor                                    |
| 0,327 | 0,041 | Morphine 6-dehydrogenase inhibitor                             |
| 0,317 | 0,031 | Antineoplastic alkaloid                                        |
| 0,366 | 0,081 | Pro-opiomelanocortin converting enzyme inhibitor               |
| 0,325 | 0,040 | Antitoxic                                                      |
| 0,296 | 0,011 | Transactivator transcription protein inhibitor                 |
| 0,408 | 0,123 | Omptin inhibitor                                               |
| 0,357 | 0,073 | NAD(P) <sup>+</sup> -arginine ADP-ribosyltransferase inhibitor |
| 0,367 | 0,084 | CYP2C9 substrate                                               |
| 0,317 | 0,035 | Flavin-containing monooxygenase inhibitor                      |
| 0,298 | 0,018 | Aldosterone antagonist                                         |
| 0,331 | 0,051 | Para amino benzoic acid antagonist                             |
| 0,353 | 0,073 | CYP2C19 inducer                                                |
| 0,350 | 0,070 | Mucinamylserine mucinaminidase inhibitor                       |
| 0,315 | 0,035 | Adrenaline release stimulant                                   |
| 0,294 | 0,014 | ATPase inhibitor                                               |
| 0,324 | 0,045 | DNA synthesis inhibitor                                        |
| 0,341 | 0,062 | Sigma receptor agonist                                         |
| 0,337 | 0,059 | Anesthetic general                                             |

|       |       |                                                                 |
|-------|-------|-----------------------------------------------------------------|
| 0,312 | 0,035 | Chemopreventive                                                 |
| 0,349 | 0,071 | CYP2E1 inducer                                                  |
| 0,380 | 0,103 | Carboxypeptidase Taq inhibitor                                  |
| 0,354 | 0,078 | Thymidylate 5'-phosphatase inhibitor                            |
| 0,290 | 0,013 | Antineoplastic (squamous cell carcinoma)                        |
| 0,357 | 0,082 | CYP4A11 substrate                                               |
| 0,341 | 0,066 | CYP19A1 expression inhibitor                                    |
| 0,292 | 0,018 | Glycerone-phosphate O-acyltransferase inhibitor                 |
| 0,387 | 0,114 | Thromboxane B2 antagonist                                       |
| 0,336 | 0,063 | Phosphopantothenoylcysteine decarboxylase inhibitor             |
| 0,307 | 0,035 | Antineoplastic (colorectal cancer)                              |
| 0,318 | 0,046 | NF-E2-related factor 2 stimulant                                |
| 0,285 | 0,013 | GST T substrate                                                 |
| 0,285 | 0,013 | GST T1-1 substrate                                              |
| 0,297 | 0,025 | Undecaprenyl-diphosphatase inhibitor                            |
| 0,354 | 0,083 | Malate dehydrogenase (acceptor) inhibitor                       |
| 0,289 | 0,020 | Tropinesterase inhibitor                                        |
| 0,317 | 0,047 | Cholestanetriol 26-monooxygenase inhibitor                      |
| 0,302 | 0,033 | Sweetener                                                       |
| 0,319 | 0,050 | Antiparasitic                                                   |
| 0,385 | 0,117 | Mannotetraose 2-alpha-N-acetylglucosaminyltransferase inhibitor |
| 0,311 | 0,043 | Cutinase inhibitor                                              |
| 0,316 | 0,049 | Taurine-2-oxoglutarate transaminase inhibitor                   |
| 0,277 | 0,010 | Interferon antagonist                                           |
| 0,299 | 0,033 | Antineoplastic (colon cancer)                                   |
| 0,279 | 0,014 | UGT2B10 substrate                                               |
| 0,348 | 0,084 | Centromere associated protein inhibitor                         |
| 0,358 | 0,095 | Fragilysin inhibitor                                            |
| 0,273 | 0,010 | Protein synthesis stimulant                                     |
| 0,351 | 0,089 | 5 Hydroxytryptamine release stimulant                           |
| 0,276 | 0,015 | Melanin inhibitor                                               |
| 0,294 | 0,034 | Retinoprotector                                                 |
| 0,307 | 0,048 | ICAM1 expression inhibitor                                      |
| 0,277 | 0,017 | Antineoplastic (carcinoma)                                      |
| 0,294 | 0,034 | Galactolipase inhibitor                                         |
| 0,373 | 0,114 | MAP kinase stimulant                                            |
| 0,345 | 0,086 | Manganese peroxidase inhibitor                                  |

|       |       |                                                                    |
|-------|-------|--------------------------------------------------------------------|
| 0,281 | 0,024 | Alkylator                                                          |
| 0,340 | 0,083 | Gluconate 5-dehydrogenase inhibitor                                |
| 0,294 | 0,038 | Aspergillopepsin II inhibitor                                      |
| 0,265 | 0,009 | Interferon gamma antagonist                                        |
| 0,276 | 0,022 | CYP2A10 substrate                                                  |
| 0,299 | 0,045 | NOS2 expression inhibitor                                          |
| 0,370 | 0,116 | Preneoplastic conditions treatment                                 |
| 0,298 | 0,044 | Xylan endo-1,3-beta-xylosidase inhibitor                           |
| 0,292 | 0,039 | Glycine dehydrogenase (decarboxylating) inhibitor                  |
| 0,265 | 0,014 | Estradiol 17alpha-dehydrogenase inhibitor                          |
| 0,330 | 0,078 | Acetylesterase inhibitor                                           |
| 0,277 | 0,025 | Cyclooxygenase substrate                                           |
| 0,315 | 0,064 | Antinephritic                                                      |
| 0,319 | 0,068 | 3-Cyanoalanine hydratase inhibitor                                 |
| 0,290 | 0,040 | Alpha-N-acetylglucosaminidase inhibitor                            |
| 0,272 | 0,024 | Bile-salt sulfotransferase inhibitor                               |
| 0,263 | 0,015 | 4-Alpha-glucanotransferase inhibitor                               |
| 0,304 | 0,056 | Anticarcinogenic                                                   |
| 0,276 | 0,029 | Antineoplastic (lymphoma)                                          |
| 0,266 | 0,019 | Gastrointestinal motility stimulant                                |
| 0,270 | 0,024 | Cholesterol oxidase inhibitor                                      |
| 0,304 | 0,057 | Antiviral (Poxvirus)                                               |
| 0,343 | 0,097 | Fatty-acyl-CoA synthase inhibitor                                  |
| 0,349 | 0,103 | CYP2D16 substrate                                                  |
| 0,322 | 0,077 | CYP2B6 substrate                                                   |
| 0,289 | 0,044 | Signal peptidase I inhibitor                                       |
| 0,250 | 0,005 | Pregnane X receptor agonist                                        |
| 0,318 | 0,073 | Peptide-N4-(N-acetyl-beta-glucosaminy)asparagine amidase inhibitor |
| 0,269 | 0,025 | Rhizopuspepsin inhibitor                                           |
| 0,314 | 0,070 | Nitrite reductase (NO-forming) inhibitor                           |
| 0,329 | 0,086 | Intermittent claudication treatment                                |
| 0,302 | 0,059 | Glycolate dehydrogenase inhibitor                                  |
| 0,341 | 0,099 | Biotinidase inhibitor                                              |
| 0,266 | 0,025 | Antitussive, narcotic                                              |
| 0,289 | 0,048 | Analgesic stimulant                                                |
| 0,299 | 0,058 | Poly(beta-D-mannuronate) lyase inhibitor                           |
| 0,263 | 0,023 | UGT2B9 substrate                                                   |

|       |       |                                                          |
|-------|-------|----------------------------------------------------------|
| 0,326 | 0,086 | Antithrombotic                                           |
| 0,242 | 0,003 | Anesthetic inhalation                                    |
| 0,252 | 0,014 | Antirickettsial                                          |
| 0,320 | 0,082 | CYP2A6 substrate                                         |
| 0,247 | 0,010 | Cyclooxygenase 1 substrate                               |
| 0,282 | 0,045 | Anthelmintic                                             |
| 0,288 | 0,052 | Yeast ribonuclease inhibitor                             |
| 0,315 | 0,078 | Radioprotector                                           |
| 0,377 | 0,140 | 5 Hydroxytryptamine uptake stimulant                     |
| 0,271 | 0,037 | Bisphosphoglycerate mutase inhibitor                     |
| 0,256 | 0,022 | Galacturan 1,4-alpha-galacturonidase inhibitor           |
| 0,294 | 0,061 | Glucan 1,4-alpha-maltotetraohydrolase inhibitor          |
| 0,288 | 0,055 | Ethanolamine-phosphate cytidyltransferase inhibitor      |
| 0,296 | 0,063 | Lysyl oxidase inhibitor                                  |
| 0,365 | 0,135 | NADPH-cytochrome-c2 reductase inhibitor                  |
| 0,336 | 0,106 | Arginine 2-monooxygenase inhibitor                       |
| 0,260 | 0,030 | Antimycoplasmal                                          |
| 0,260 | 0,031 | Cholesterol synthesis inhibitor                          |
| 0,341 | 0,112 | Radiosensitizer                                          |
| 0,259 | 0,030 | Vanilloid agonist                                        |
| 0,255 | 0,027 | Antineoplastic (bone cancer)                             |
| 0,326 | 0,098 | Sphinganine kinase inhibitor                             |
| 0,278 | 0,050 | Raynaud's phenomenon treatment                           |
| 0,305 | 0,078 | H <sup>+</sup> -transporting two-sector ATPase inhibitor |
| 0,272 | 0,045 | Phospholipase A1 inhibitor                               |
| 0,316 | 0,090 | (R)-Pantolactone dehydrogenase (flavin) inhibitor        |
| 0,330 | 0,105 | Interleukin 2 agonist                                    |
| 0,255 | 0,031 | CYP4F2 substrate                                         |
| 0,310 | 0,085 | CYP2F1 substrate                                         |
| 0,246 | 0,021 | UGT2B18 substrate                                        |
| 0,331 | 0,108 | Alcohol O-acetyltransferase inhibitor                    |
| 0,250 | 0,028 | CYP2C8 inducer                                           |
| 0,308 | 0,086 | Mediator release inhibitor                               |
| 0,290 | 0,069 | Sulfite oxidase inhibitor                                |
| 0,295 | 0,074 | IgA-specific serine endopeptidase inhibitor              |
| 0,354 | 0,134 | Fructose 5-dehydrogenase inhibitor                       |
| 0,302 | 0,083 | Chitinase inhibitor                                      |

|       |       |                                                                          |
|-------|-------|--------------------------------------------------------------------------|
| 0,330 | 0,111 | Nucleotide metabolism regulator                                          |
| 0,356 | 0,137 | Octopamine antagonist                                                    |
| 0,352 | 0,133 | Thioredoxin inhibitor                                                    |
| 0,254 | 0,036 | Interleukin 6 antagonist                                                 |
| 0,284 | 0,066 | Antibacterial                                                            |
| 0,245 | 0,027 | GABA B receptor agonist                                                  |
| 0,242 | 0,025 | Glucosyl transferase inhibitor                                           |
| 0,299 | 0,082 | Adenylyl-sulfate reductase inhibitor                                     |
| 0,249 | 0,033 | 1,4-Alpha-glucan branching enzyme inhibitor                              |
| 0,275 | 0,060 | Spasmolytic, Papaverin-like                                              |
| 0,219 | 0,005 | Interleukin 10 antagonist                                                |
| 0,297 | 0,083 | Antiinflammatory, ophthalmic                                             |
| 0,290 | 0,077 | UGT1A9 substrate                                                         |
| 0,291 | 0,078 | Antiinflammatory, intestinal                                             |
| 0,290 | 0,076 | Antiprotozoal (Amoeba)                                                   |
| 0,335 | 0,121 | Spasmolytic, urinary                                                     |
| 0,257 | 0,044 | UGT2B7 substrate                                                         |
| 0,286 | 0,073 | 4-Nitrophenylphosphatase inhibitor                                       |
| 0,233 | 0,021 | Chitin synthase inhibitor                                                |
| 0,254 | 0,042 | Styrene-oxide isomerase inhibitor                                        |
| 0,311 | 0,100 | Phenol O-methyltransferase inhibitor                                     |
| 0,235 | 0,023 | Endoglycosylceramidase inhibitor                                         |
| 0,237 | 0,026 | Testosterone 17beta-dehydrogenase inhibitor                              |
| 0,267 | 0,058 | Transcription factor NF kappa A inhibitor                                |
| 0,300 | 0,090 | Fucosterol-epoxide lyase inhibitor                                       |
| 0,282 | 0,073 | Thiosulfate dehydrogenase inhibitor                                      |
| 0,344 | 0,135 | Oxygen scavenger                                                         |
| 0,366 | 0,157 | Phthalate 4,5-dioxygenase inhibitor                                      |
| 0,256 | 0,047 | Phosphoenolpyruvate mutase inhibitor                                     |
| 0,267 | 0,059 | Levanase inhibitor                                                       |
| 0,255 | 0,047 | N-acetyllactosaminide beta-1,3-N-acetylglucosaminyltransferase inhibitor |
| 0,292 | 0,085 | ADP-thymidine kinase inhibitor                                           |
| 0,280 | 0,073 | 2-Haloacid dehalogenase inhibitor                                        |
| 0,232 | 0,026 | CYP4B substrate                                                          |
| 0,297 | 0,091 | Antiviral (Adenovirus)                                                   |
| 0,241 | 0,035 | CYP1B substrate                                                          |
| 0,301 | 0,096 | 1-Acylglycerol-3-phosphate O-acyltransferase inhibitor                   |

|       |       |                                                                              |
|-------|-------|------------------------------------------------------------------------------|
| 0,280 | 0,075 | Cytochrome-b5 reductase inhibitor                                            |
| 0,212 | 0,009 | 4-Carboxymethyl-4-methylbutenolide mutase inhibitor                          |
| 0,302 | 0,100 | Antiinfective                                                                |
| 0,263 | 0,060 | 2,3,4,5-Tetrahydropyridine-2,6-dicarboxylate N-succinyltransferase inhibitor |
| 0,230 | 0,028 | Antihypotensive                                                              |
| 0,306 | 0,104 | Histidine N-acetyltransferase inhibitor                                      |
| 0,306 | 0,105 | Calcium regulator                                                            |
| 0,257 | 0,055 | Chaperonin ATPase inhibitor                                                  |
| 0,247 | 0,047 | Anthranilate-CoA ligase inhibitor                                            |
| 0,211 | 0,011 | CYP3A5 inducer                                                               |
| 0,309 | 0,109 | Cyclic AMP phosphodiesterase inhibitor                                       |
| 0,226 | 0,026 | Arachidonic acid antagonist                                                  |
| 0,271 | 0,073 | CYP2C29 substrate                                                            |
| 0,249 | 0,051 | UGT1A4 substrate                                                             |
| 0,244 | 0,047 | Dynein ATPase inhibitor                                                      |
| 0,281 | 0,085 | Chitosanase inhibitor                                                        |
| 0,250 | 0,053 | Polyribonucleotide nucleotidyltransferase inhibitor                          |
| 0,244 | 0,049 | Polygalacturonase inhibitor                                                  |
| 0,348 | 0,153 | Phospholipid-translocating ATPase inhibitor                                  |
| 0,224 | 0,029 | Ferredoxin-NADP+ reductase inhibitor                                         |
| 0,211 | 0,016 | Hypoxia inducible factor 1 alpha inhibitor                                   |
| 0,222 | 0,028 | Protein kinase stimulant                                                     |
| 0,279 | 0,085 | tRNA-pseudouridine synthase I inhibitor                                      |
| 0,328 | 0,133 | 2-Dehydropantoate 2-reductase inhibitor                                      |
| 0,212 | 0,017 | Choloylglycine hydrolase inhibitor                                           |
| 0,218 | 0,024 | Adenylate cyclase inhibitor                                                  |
| 0,217 | 0,023 | Contraceptive female                                                         |
| 0,232 | 0,039 | UGT2B15 substrate                                                            |
| 0,266 | 0,074 | Antiviral (Influenza A)                                                      |
| 0,243 | 0,051 | Cellulose 1,4-beta-cellobiosidase inhibitor                                  |
| 0,209 | 0,017 | Corticosteroid antagonist                                                    |
| 0,249 | 0,058 | Oxytocic                                                                     |
| 0,215 | 0,023 | Riboflavin phosphotransferase inhibitor                                      |
| 0,230 | 0,039 | Lymphocytopoiesis inhibitor                                                  |
| 0,243 | 0,052 | D-alanine 2-hydroxymethyltransferase inhibitor                               |
| 0,277 | 0,086 | Limulus clotting factor C inhibitor                                          |
| 0,242 | 0,053 | Myeloblastin inhibitor                                                       |

|       |       |                                                                                  |
|-------|-------|----------------------------------------------------------------------------------|
| 0,274 | 0,086 | Lysostaphin inhibitor                                                            |
| 0,228 | 0,039 | Mucolytic                                                                        |
| 0,300 | 0,111 | Prion diseases treatment                                                         |
| 0,226 | 0,037 | Antihematotoxic                                                                  |
| 0,239 | 0,051 | Polyneuridine-aldehyde esterase inhibitor                                        |
| 0,244 | 0,056 | Alpha-1,6-mannosyl-glycoprotein 4-beta-N-acetylglucosaminyltransferase inhibitor |
| 0,304 | 0,116 | Vasodilator, coronary                                                            |
| 0,341 | 0,153 | Glycerol-ether monooxygenase inhibitor                                           |
| 0,298 | 0,111 | Muscular dystrophy treatment                                                     |
| 0,317 | 0,130 | RNA-directed RNA polymerase inhibitor                                            |
| 0,250 | 0,063 | Cyclic AMP modulator                                                             |
| 0,200 | 0,014 | Adenylate cyclase stimulant                                                      |
| 0,279 | 0,093 | Nitrite reductase [NAD(P)H] inhibitor                                            |
| 0,232 | 0,045 | Expectorant                                                                      |
| 0,229 | 0,043 | Glucan 1,4-beta-glucosidase inhibitor                                            |
| 0,294 | 0,108 | Cyanoalanine nitrilase inhibitor                                                 |
| 0,216 | 0,031 | L-iduronidase inhibitor                                                          |
| 0,277 | 0,093 | Methylenetetrahydrofolate reductase (NADPH) inhibitor                            |
| 0,189 | 0,004 | Phosphatidylinositol 3-kinase stimulant                                          |
| 0,222 | 0,038 | Antineoplastic (glioblastoma multiforme)                                         |
| 0,200 | 0,016 | Alpha-L-rhamnosidase inhibitor                                                   |
| 0,245 | 0,060 | CYP2B2 substrate                                                                 |
| 0,279 | 0,095 | Creatininase inhibitor                                                           |
| 0,208 | 0,024 | CYP4B1 substrate                                                                 |
| 0,258 | 0,075 | Phospholipase C inhibitor                                                        |
| 0,227 | 0,044 | Lipotropic                                                                       |
| 0,279 | 0,097 | Enteropeptidase inhibitor                                                        |
| 0,211 | 0,029 | Glutamate (mGluR5) agonist                                                       |
| 0,248 | 0,066 | Lactose synthase inhibitor                                                       |
| 0,277 | 0,096 | 3-Phytase inhibitor                                                              |
| 0,350 | 0,170 | CYP2C8 inhibitor                                                                 |
| 0,250 | 0,070 | Beta-carotene 15,15'-monooxygenase inhibitor                                     |
| 0,250 | 0,071 | Glyoxylate oxidase inhibitor                                                     |
| 0,241 | 0,063 | Oryzin inhibitor                                                                 |
| 0,293 | 0,115 | Glucose oxidase inhibitor                                                        |
| 0,181 | 0,003 | Inositol 1,4,5-triphosphate receptor antagonist                                  |
| 0,290 | 0,112 | Dehydro-L-gulonate decarboxylase inhibitor                                       |

|       |       |                                                               |
|-------|-------|---------------------------------------------------------------|
| 0,235 | 0,058 | Choleretic                                                    |
| 0,214 | 0,038 | ADP-ribosylarginine hydrolase inhibitor                       |
| 0,211 | 0,035 | GST M1-1 substrate                                            |
| 0,298 | 0,122 | Superoxide dismutase inhibitor                                |
| 0,300 | 0,125 | Cl--transporting ATPase inhibitor                             |
| 0,183 | 0,009 | Galactosylceramidase inhibitor                                |
| 0,241 | 0,067 | Peroxidase substrate                                          |
| 0,230 | 0,057 | Anesthetic                                                    |
| 0,188 | 0,015 | CYP19 substrate                                               |
| 0,225 | 0,052 | P-glycoprotein inhibitor                                      |
| 0,202 | 0,030 | Protein-glucosylgalactosylhydroxylysine glucosidase inhibitor |
| 0,288 | 0,116 | MAP3K5 inhibitor                                              |
| 0,205 | 0,033 | Thioredoxin reductase inhibitor                               |
| 0,233 | 0,062 | CYP1A1 inhibitor                                              |
| 0,234 | 0,064 | ATP-binding cassette A1 stimulant                             |
| 0,220 | 0,050 | Alpha-amylase inhibitor                                       |
| 0,222 | 0,052 | Sedoheptulose-bisphosphatase inhibitor                        |
| 0,260 | 0,091 | Glutamate-tRNA ligase inhibitor                               |
| 0,248 | 0,079 | 3C-like protease (Human coronavirus) inhibitor                |
| 0,215 | 0,046 | 2-Acylglycerol O-acyltransferase inhibitor                    |
| 0,243 | 0,075 | Cell wall biosynthesis inhibitor                              |
| 0,296 | 0,128 | Amine dehydrogenase inhibitor                                 |
| 0,187 | 0,019 | Isoamylase inhibitor                                          |
| 0,252 | 0,085 | CYP1A1 substrate                                              |
| 0,211 | 0,043 | Laxative                                                      |
| 0,218 | 0,051 | Severe acute respiratory syndrome treatment                   |
| 0,179 | 0,013 | Antitreponemal                                                |
| 0,196 | 0,030 | SMN2 expression enhancer                                      |
| 0,247 | 0,081 | Antiviral (CMV)                                               |
| 0,252 | 0,086 | Indanol dehydrogenase inhibitor                               |
| 0,184 | 0,019 | Guanylate cyclase stimulant                                   |
| 0,240 | 0,075 | Quinoprotein glucose dehydrogenase inhibitor                  |
| 0,227 | 0,063 | Ubiquitin thiolesterase inhibitor                             |
| 0,229 | 0,064 | 3-Methylbutanal reductase inhibitor                           |
| 0,307 | 0,144 | Nicotine dehydrogenase inhibitor                              |
| 0,239 | 0,076 | Antiprotozoal (Trichomonas)                                   |
| 0,201 | 0,038 | 2-Dehydropantoate aldolase inhibitor                          |

|       |       |                                                             |
|-------|-------|-------------------------------------------------------------|
| 0,232 | 0,070 | Aminomuconate-semialdehyde dehydrogenase inhibitor          |
| 0,204 | 0,041 | Phosphoenolpyruvate-protein phosphotransferase inhibitor    |
| 0,177 | 0,014 | UGT2B11 substrate                                           |
| 0,222 | 0,059 | D-threo-aldose 1-dehydrogenase inhibitor                    |
| 0,293 | 0,131 | Aspartate-phenylpyruvate transaminase inhibitor             |
| 0,263 | 0,102 | P-benzoquinone reductase (NADPH) inhibitor                  |
| 0,235 | 0,074 | UGT1A6 substrate                                            |
| 0,202 | 0,040 | Antineoplastic (cervical cancer)                            |
| 0,249 | 0,089 | 2-Hydroxymuconate-semialdehyde hydrolase inhibitor          |
| 0,202 | 0,042 | Glycerol-1-phosphatase inhibitor                            |
| 0,239 | 0,079 | Glutathione dehydrogenase (ascorbate) inhibitor             |
| 0,234 | 0,074 | Bisphosphoglycerate phosphatase inhibitor                   |
| 0,229 | 0,070 | Pseudouridylate synthase inhibitor                          |
| 0,284 | 0,125 | Leukotriene-C4 synthase inhibitor                           |
| 0,165 | 0,007 | Acetylcholine M3 receptor agonist                           |
| 0,170 | 0,012 | Shab potassium channel blocker                              |
| 0,281 | 0,123 | Polyamine-transporting ATPase inhibitor                     |
| 0,200 | 0,043 | Alkene monooxygenase inhibitor                              |
| 0,237 | 0,080 | Linoleoyl-CoA desaturase inhibitor                          |
| 0,240 | 0,083 | CYP2E1 substrate                                            |
| 0,210 | 0,053 | Growth stimulant                                            |
| 0,207 | 0,050 | Menstruation disorders treatment                            |
| 0,228 | 0,072 | 1,2- $\alpha$ -L-fucosidase inhibitor                       |
| 0,220 | 0,063 | Rhodotorulapepsin inhibitor                                 |
| 0,207 | 0,051 | Alpha-glucuronidase inhibitor                               |
| 0,258 | 0,102 | Isopenicillin-N epimerase inhibitor                         |
| 0,228 | 0,072 | N-acetyllactosamine synthase inhibitor                      |
| 0,216 | 0,061 | Mannitol-1-phosphatase inhibitor                            |
| 0,209 | 0,054 | Plasmanylethanolamine desaturase inhibitor                  |
| 0,220 | 0,066 | Aromatic-hydroxylamine O-acetyltransferase inhibitor        |
| 0,215 | 0,061 | 3-Demethylubiquinone-9 3-O-methyltransferase inhibitor      |
| 0,225 | 0,071 | Alcohol dehydrogenase [NAD(P)+] inhibitor                   |
| 0,247 | 0,093 | Aspergillus nuclease S1 inhibitor                           |
| 0,195 | 0,042 | Ganglioside galactosyltransferase inhibitor                 |
| 0,255 | 0,102 | N-formylmethionyl-peptidase inhibitor                       |
| 0,167 | 0,014 | DELTA24-sterol reductase inhibitor                          |
| 0,177 | 0,024 | Glycosylphosphatidylinositol diacylglycerol-lyase inhibitor |

|       |       |                                                             |
|-------|-------|-------------------------------------------------------------|
| 0,219 | 0,066 | Prunasin beta-glucosidase inhibitor                         |
| 0,267 | 0,115 | Prostaglandin-A1 DELTA-isomerase inhibitor                  |
| 0,301 | 0,148 | Fibrolase inhibitor                                         |
| 0,188 | 0,037 | Phosphatidate cytidyltransferase inhibitor                  |
| 0,290 | 0,139 | Nitrate reductase (cytochrome) inhibitor                    |
| 0,314 | 0,163 | Aminobutyraldehyde dehydrogenase inhibitor                  |
| 0,159 | 0,008 | Aldose 1-epimerase inhibitor                                |
| 0,237 | 0,087 | Antihypercholesterolemic                                    |
| 0,209 | 0,059 | P-glycoprotein 1 inhibitor                                  |
| 0,254 | 0,104 | CYP4A substrate                                             |
| 0,193 | 0,043 | Methyltransferase substrate                                 |
| 0,236 | 0,086 | CYP2E substrate                                             |
| 0,181 | 0,032 | Pectin lyase inhibitor                                      |
| 0,183 | 0,033 | Antibiotic                                                  |
| 0,173 | 0,024 | Beta-glucosidase inhibitor                                  |
| 0,300 | 0,152 | (R)-6-hydroxynicotine oxidase inhibitor                     |
| 0,227 | 0,079 | Antidote                                                    |
| 0,188 | 0,041 | Cellulase inhibitor                                         |
| 0,183 | 0,036 | Skin whitener                                               |
| 0,185 | 0,038 | Diacylglycerol cholinephosphotransferase inhibitor          |
| 0,235 | 0,089 | Dipeptidase E inhibitor                                     |
| 0,196 | 0,050 | Antineoplastic (bladder cancer)                             |
| 0,265 | 0,119 | (S)-6-hydroxynicotine oxidase inhibitor                     |
| 0,277 | 0,131 | Cancer associated disorders treatment                       |
| 0,150 | 0,005 | Alpha-mannosidase inhibitor                                 |
| 0,197 | 0,052 | Aldehyde dehydrogenase (NADP+) inhibitor                    |
| 0,208 | 0,063 | UGT1A1 substrate                                            |
| 0,190 | 0,045 | CYP2B18 substrate                                           |
| 0,251 | 0,106 | 4-Methoxybenzoate monooxygenase (O-demethylating) inhibitor |
| 0,184 | 0,039 | Valine-tRNA ligase inhibitor                                |
| 0,165 | 0,021 | Narcotic antagonist                                         |
| 0,198 | 0,054 | NAD+ synthase (glutamine-hydrolysing) inhibitor             |
| 0,204 | 0,060 | Retinol dehydrogenase inhibitor                             |
| 0,171 | 0,028 | Trehalose-phosphatase inhibitor                             |
| 0,203 | 0,060 | Inorganic diphosphatase inhibitor                           |
| 0,176 | 0,033 | CYP19 inhibitor                                             |
| 0,169 | 0,027 | Antineoplastic antibiotic                                   |

|       |       |                                                             |
|-------|-------|-------------------------------------------------------------|
| 0,157 | 0,015 | Testosterone agonist                                        |
| 0,180 | 0,038 | Glycopeptide alpha-N-acetylgalactosaminidase inhibitor      |
| 0,151 | 0,010 | Imidazoleglycerol-phosphate dehydratase inhibitor           |
| 0,285 | 0,145 | Dimethylargininase inhibitor                                |
| 0,258 | 0,118 | 4-Hydroxyproline epimerase inhibitor                        |
| 0,158 | 0,018 | Secretase stimulant                                         |
| 0,158 | 0,018 | Secretase alpha stimulant                                   |
| 0,248 | 0,108 | Urethanase inhibitor                                        |
| 0,241 | 0,102 | Aldehyde dehydrogenase (pyrroloquinoline-quinone) inhibitor |
| 0,176 | 0,037 | Peristaltic stimulant                                       |
| 0,169 | 0,031 | Alpha-N-acetylgalactosaminidase inhibitor                   |
| 0,201 | 0,064 | Antinaupathic                                               |
| 0,316 | 0,179 | Diabetic neuropathy treatment                               |
| 0,243 | 0,106 | Peptide alpha-N-acetyltransferase inhibitor                 |
| 0,164 | 0,027 | Urolithiasis treatment                                      |
| 0,193 | 0,056 | Maleate isomerase inhibitor                                 |
| 0,170 | 0,034 | Cocain dependency treatment                                 |
| 0,282 | 0,146 | Spermidine dehydrogenase inhibitor                          |
| 0,188 | 0,052 | Stromelysin 2 inhibitor                                     |
| 0,197 | 0,062 | Aureolysin inhibitor                                        |
| 0,206 | 0,071 | Antiparkinsonian, tremor relieving                          |
| 0,161 | 0,025 | Tubulin antagonist                                          |
| 0,236 | 0,101 | CYP2C10 substrate                                           |
| 0,198 | 0,063 | 4-Hydroxybenzoate nonaprenyltransferase inhibitor           |
| 0,180 | 0,046 | Allantoate deiminase inhibitor                              |
| 0,147 | 0,013 | Epoxide hydrolase substrate                                 |
| 0,181 | 0,047 | Polar-amino-acid-transporting ATPase inhibitor              |
| 0,241 | 0,108 | Vasodilator                                                 |
| 0,148 | 0,014 | CYP4F substrate                                             |
| 0,184 | 0,051 | Pyruvate carboxylase inhibitor                              |
| 0,197 | 0,064 | Antianorexic                                                |
| 0,172 | 0,039 | Histamine agonist                                           |
| 0,194 | 0,061 | Serratia marcescens nuclease inhibitor                      |
| 0,235 | 0,103 | Thiamine pyridinylase inhibitor                             |
| 0,173 | 0,041 | Gaucher disease treatment                                   |
| 0,268 | 0,135 | Retinoic acid metabolism inhibitor                          |
| 0,228 | 0,096 | Long-chain-aldehyde dehydrogenase inhibitor                 |

|       |       |                                                                                  |
|-------|-------|----------------------------------------------------------------------------------|
| 0,158 | 0,026 | Demethylsterigmatocystin 6-O-methyltransferase inhibitor                         |
| 0,270 | 0,138 | Tpr proteinase ( <i>Porphyromonas gingivalis</i> ) inhibitor                     |
| 0,150 | 0,019 | Rhodopsin kinase inhibitor                                                       |
| 0,147 | 0,016 | Mycodextranase inhibitor                                                         |
| 0,195 | 0,064 | Urate-ribonucleotide phosphorylase inhibitor                                     |
| 0,202 | 0,072 | Lipocortins synthesis antagonist                                                 |
| 0,256 | 0,126 | Inotropic                                                                        |
| 0,134 | 0,004 | Potassium channel Kv1.3 blocker                                                  |
| 0,146 | 0,016 | Leucine-tRNA ligase inhibitor                                                    |
| 0,185 | 0,055 | Laminaribiose phosphorylase inhibitor                                            |
| 0,303 | 0,173 | 2-Hydroxyquinoline 8-monooxygenase inhibitor                                     |
| 0,244 | 0,115 | CYP2C19 substrate                                                                |
| 0,168 | 0,039 | Xylose isomerase inhibitor                                                       |
| 0,137 | 0,009 | Osmotic diuretic                                                                 |
| 0,230 | 0,102 | Protein-arginine deiminase inhibitor                                             |
| 0,210 | 0,082 | Pappalysin-1 inhibitor                                                           |
| 0,175 | 0,048 | Alpha-N-arabinofuranosidase inhibitor                                            |
| 0,187 | 0,060 | Aryldialkylphosphatase inhibitor                                                 |
| 0,215 | 0,087 | UDP-glucuronosyltransferase substrate                                            |
| 0,163 | 0,036 | Cholate-CoA ligase inhibitor                                                     |
| 0,159 | 0,032 | Sodium/bile acid cotransporter inhibitor                                         |
| 0,146 | 0,019 | Anabolic                                                                         |
| 0,200 | 0,073 | N-Acyl-D-aspartate deacylase inhibitor                                           |
| 0,136 | 0,010 | Alpha-1,6-mannosyl-glycoprotein 6-beta-N-acetylglucosaminyltransferase inhibitor |
| 0,182 | 0,056 | Myosin-light-chain-phosphatase inhibitor                                         |
| 0,136 | 0,010 | Glutamate (mGluR1) antagonist                                                    |
| 0,141 | 0,016 | Gentamicin 2''-nucleotidyltransferase inhibitor                                  |
| 0,178 | 0,053 | Galactokinase inhibitor                                                          |
| 0,219 | 0,094 | Viral entry inhibitor                                                            |
| 0,157 | 0,033 | DNA directed DNA polymerase inhibitor                                            |
| 0,217 | 0,092 | Antifibrinolytic                                                                 |
| 0,177 | 0,052 | Ethanolaminephosphotransferase inhibitor                                         |
| 0,186 | 0,062 | CYP1B1 substrate                                                                 |
| 0,161 | 0,037 | NAD(P) <sup>+</sup> transhydrogenase (B-specific) inhibitor                      |
| 0,233 | 0,110 | Immunostimulant                                                                  |
| 0,129 | 0,006 | Mannosidase inhibitor                                                            |
| 0,159 | 0,036 | (R)-limonene 6-monooxygenase inhibitor                                           |

|       |       |                                                                      |
|-------|-------|----------------------------------------------------------------------|
| 0,150 | 0,028 | Glutamate release inhibitor                                          |
| 0,272 | 0,151 | S-formylglutathione hydrolase inhibitor                              |
| 0,214 | 0,093 | [acyl-carrier-protein] S-acetyltransferase inhibitor                 |
| 0,152 | 0,031 | Diacylglycerol kinase inhibitor                                      |
| 0,213 | 0,092 | Salicylate 1-monooxygenase inhibitor                                 |
| 0,154 | 0,033 | Glyceraldehyde-3-phosphate dehydrogenase (phosphorylating) inhibitor |
| 0,134 | 0,014 | Alpha glucosidase inhibitor                                          |
| 0,165 | 0,045 | CDP-diacylglycerol-inositol 3-phosphatidyltransferase inhibitor      |
| 0,184 | 0,064 | LDLR expression enhancer                                             |
| 0,174 | 0,055 | Aspartate-tRNA ligase inhibitor                                      |
| 0,243 | 0,125 | CYP2C18 substrate                                                    |
| 0,153 | 0,034 | D-arabinonolactone oxidase inhibitor                                 |
| 0,127 | 0,009 | RNA-directed RNA polymerase stimulant                                |
| 0,255 | 0,137 | CYP2A8 substrate                                                     |
| 0,199 | 0,082 | Horriylsin inhibitor                                                 |
| 0,179 | 0,062 | Lactaldehyde reductase inhibitor                                     |
| 0,200 | 0,084 | Polarisation inhibitor                                               |
| 0,198 | 0,081 | Cyclopropane-fatty-acyl-phospholipid synthase inhibitor              |
| 0,297 | 0,180 | Mucositis treatment                                                  |
| 0,166 | 0,050 | BRAF expression inhibitor                                            |
| 0,146 | 0,029 | Succinate dehydrogenase inhibitor                                    |
| 0,133 | 0,017 | Nicotinic receptor alpha7 subunit antagonist                         |
| 0,185 | 0,069 | UGT1A3 substrate                                                     |
| 0,187 | 0,071 | Glutathione peroxidase inhibitor                                     |
| 0,200 | 0,084 | Diabetic nephropathy treatment                                       |
| 0,270 | 0,155 | N-hydroxyarylamine O-acetyltransferase inhibitor                     |
| 0,128 | 0,013 | Ca <sup>2+</sup> -transporting ATPase inhibitor                      |
| 0,185 | 0,070 | Poly(alpha-L-guluronate) lyase inhibitor                             |
| 0,127 | 0,012 | Alpha,alpha-trehalose phosphorylase inhibitor                        |
| 0,183 | 0,068 | Vascular adhesion protein 1 inhibitor                                |
| 0,128 | 0,013 | Anticholelithogenic                                                  |
| 0,173 | 0,059 | 3-Chloro-D-alanine dehydrochlorinase inhibitor                       |
| 0,131 | 0,017 | Alpha-L-fucosidase inhibitor                                         |
| 0,181 | 0,067 | Gamma-butyrobetaine dioxygenase inhibitor                            |
| 0,173 | 0,060 | 2-Haloacid dehalogenase (configuration-inverting) inhibitor          |
| 0,284 | 0,171 | Pancreatic elastase inhibitor                                        |
| 0,133 | 0,020 | Alternansucrase inhibitor                                            |

|       |       |                                                             |
|-------|-------|-------------------------------------------------------------|
| 0,235 | 0,122 | Spasmolytic                                                 |
| 0,238 | 0,125 | 4-Hydroxymandelate oxidase inhibitor                        |
| 0,196 | 0,085 | Guanosine-3',5'-bis(diphosphate) 3'-diphosphatase inhibitor |
| 0,161 | 0,050 | UGT1A7 substrate                                            |
| 0,162 | 0,051 | 3-Ketovalidoxylamine C-N-lyase inhibitor                    |
| 0,181 | 0,071 | 4-Chlorobenzoyl-CoA dehalogenase inhibitor                  |
| 0,157 | 0,048 | Contraceptive                                               |
| 0,118 | 0,008 | Mannosyl-oligosaccharide 1,2-alpha-mannosidase inhibitor    |
| 0,191 | 0,081 | Neurotrophic factor enhancer                                |
| 0,135 | 0,025 | Cytokine release inhibitor                                  |
| 0,150 | 0,041 | Glycerol-3-phosphate O-acyltransferase inhibitor            |
| 0,198 | 0,089 | CYP1A2 inducer                                              |
| 0,172 | 0,063 | D-xylulose reductase inhibitor                              |
| 0,176 | 0,067 | Lipoxygenase substrate                                      |
| 0,116 | 0,007 | Prostacyclin agonist                                        |
| 0,228 | 0,119 | Age-related macular degeneration treatment                  |
| 0,111 | 0,003 | Antimitotic, Podophyllotoxin-like                           |
| 0,208 | 0,100 | Prolyl aminopeptidase inhibitor                             |
| 0,239 | 0,130 | Antimycobacterial                                           |
| 0,142 | 0,034 | Nicotinamide-nucleotide adenyltransferase inhibitor         |
| 0,176 | 0,068 | N-acetylneuraminate 4-O-acetyltransferase inhibitor         |
| 0,136 | 0,028 | Retinol O-fatty-acyltransferase inhibitor                   |
| 0,221 | 0,114 | Lipid peroxidase inhibitor                                  |
| 0,194 | 0,087 | 2-Hydroxy-3-oxoadipate synthase inhibitor                   |
| 0,200 | 0,093 | Interleukin 10 agonist                                      |
| 0,201 | 0,094 | UGT1A substrate                                             |
| 0,130 | 0,023 | Protein kinase C stimulant                                  |
| 0,213 | 0,106 | CYP2B substrate                                             |
| 0,202 | 0,095 | Ceramide glucosyltransferase inhibitor                      |
| 0,122 | 0,016 | Heme oxygenase inhibitor                                    |
| 0,150 | 0,044 | Endo-1,4-beta-xylanase inhibitor                            |
| 0,223 | 0,117 | Glutamine-phenylpyruvate transaminase inhibitor             |
| 0,162 | 0,057 | HMG CoA synthase inhibitor                                  |
| 0,134 | 0,029 | Beta-amylase inhibitor                                      |
| 0,177 | 0,072 | UGT2B substrate                                             |
| 0,126 | 0,021 | Squalene-hopene cyclase inhibitor                           |
| 0,132 | 0,027 | Squalene epoxidase inhibitor                                |

|       |       |                                                                |
|-------|-------|----------------------------------------------------------------|
| 0,249 | 0,145 | Antiulcerative                                                 |
| 0,130 | 0,026 | Globoside alpha-N-acetylgalactosaminyltransferase inhibitor    |
| 0,194 | 0,090 | GST P substrate                                                |
| 0,157 | 0,053 | UGT1A8 substrate                                               |
| 0,130 | 0,027 | Ribose-5-phosphate-ammonia ligase inhibitor                    |
| 0,110 | 0,006 | Glutamate (mGluR3) agonist                                     |
| 0,151 | 0,048 | Carnitine dehydratase inhibitor                                |
| 0,134 | 0,031 | Deoxycytidine deaminase inhibitor                              |
| 0,148 | 0,044 | CYP26A substrate                                               |
| 0,189 | 0,086 | 2-Oxoaldehyde dehydrogenase (NADP+) inhibitor                  |
| 0,117 | 0,014 | Arabinogalactan endo-1,4-beta-galactosidase inhibitor          |
| 0,209 | 0,107 | Phosphatidylcholine-sterol O-acyltransferase inhibitor         |
| 0,217 | 0,115 | Adenosine regulator                                            |
| 0,163 | 0,061 | Geranylgeranyl-diphosphate geranylgeranyltransferase inhibitor |
| 0,215 | 0,113 | Succinate-semialdehyde dehydrogenase [NAD(P)+] inhibitor       |
| 0,149 | 0,047 | Transcription factor NF kappa B inhibitor                      |
| 0,200 | 0,099 | Benzaldehyde dehydrogenase (NADP+) inhibitor                   |
| 0,138 | 0,038 | Deoxyribonuclease X inhibitor                                  |
| 0,134 | 0,034 | 5 Hydroxytryptamine 4A antagonist                              |
| 0,110 | 0,010 | Glucose-6-phosphate translocase inhibitor                      |
| 0,198 | 0,098 | Tankyrase inhibitor                                            |
| 0,135 | 0,035 | Glucan 1,3-beta-glucosidase inhibitor                          |
| 0,151 | 0,052 | 2,2-Dialkylglycine decarboxylase (pyruvate) inhibitor          |
| 0,142 | 0,042 | Tardive dyskinesia treatment                                   |
| 0,154 | 0,054 | Pectate lyase inhibitor                                        |
| 0,238 | 0,139 | Cardioprotectant                                               |
| 0,130 | 0,031 | Isomaltulose synthase inhibitor                                |
| 0,124 | 0,026 | Phenylalanine-tRNA ligase inhibitor                            |
| 0,188 | 0,090 | Gastric antisecretory                                          |
| 0,106 | 0,008 | 3-Alpha-hydroxysteroid dehydrogenase (B-specific) inhibitor    |
| 0,155 | 0,058 | VCAM1 expression inhibitor                                     |
| 0,153 | 0,057 | UGT1A10 substrate                                              |
| 0,165 | 0,068 | Antineoplastic (glioma)                                        |
| 0,115 | 0,018 | Threonine-tRNA ligase inhibitor                                |
| 0,234 | 0,137 | Methylamine-glutamate N-methyltransferase inhibitor            |
| 0,157 | 0,061 | Aldehyde oxidase substrate                                     |
| 0,157 | 0,061 | Galactose oxidase inhibitor                                    |

|       |       |                                                                                            |
|-------|-------|--------------------------------------------------------------------------------------------|
| 0,106 | 0,010 | 1,3-Beta-glucan synthase inhibitor                                                         |
| 0,171 | 0,076 | 2,3-Dihydroxyindole 2,3-dioxygenase inhibitor                                              |
| 0,211 | 0,115 | Chloride channel activator                                                                 |
| 0,215 | 0,120 | Transketolase inhibitor                                                                    |
| 0,229 | 0,134 | Chenodeoxycholytaurine hydrolase inhibitor                                                 |
| 0,159 | 0,065 | SULT1E1 substrate                                                                          |
| 0,101 | 0,006 | RNA agonist                                                                                |
| 0,182 | 0,087 | Glutarate-semialdehyde dehydrogenase inhibitor                                             |
| 0,275 | 0,181 | Antihypoxic                                                                                |
| 0,149 | 0,055 | N-(5-amino-5-carboxypentanoyl)-L-cysteinyl-D-valine synthase inhibitor                     |
| 0,173 | 0,079 | Glycine C-acetyltransferase inhibitor                                                      |
| 0,150 | 0,056 | Calcium antagonist                                                                         |
| 0,127 | 0,034 | Cholestenone 5alpha-reductase inhibitor                                                    |
| 0,185 | 0,091 | Skin irritation, inactive                                                                  |
| 0,161 | 0,068 | Inulinase inhibitor                                                                        |
| 0,121 | 0,029 | Phosphatidylglycerol-membrane-oligosaccharide glycerophosphotransferase inhibitor          |
| 0,128 | 0,036 | Beta-D-fucosidase inhibitor                                                                |
| 0,178 | 0,087 | 2-Enoate reductase inhibitor                                                               |
| 0,157 | 0,065 | Acetylenecarboxylate hydratase inhibitor                                                   |
| 0,113 | 0,021 | Alpha,alpha-trehalose phosphorylase (configuration-retaining) inhibitor                    |
| 0,161 | 0,070 | Cytochrome-b5 reductase substrate                                                          |
| 0,140 | 0,049 | Beta-mannosidase inhibitor                                                                 |
| 0,112 | 0,021 | Fatty-acyl-ethyl-ester synthase inhibitor                                                  |
| 0,136 | 0,045 | Lanosterol 14 alpha demethylase inhibitor                                                  |
| 0,168 | 0,077 | Glyoxylate reductase (NADP+) inhibitor                                                     |
| 0,123 | 0,033 | Ketohexokinase inhibitor                                                                   |
| 0,103 | 0,013 | UGT2B7H substrate                                                                          |
| 0,103 | 0,013 | UGT2B7Y substrate                                                                          |
| 0,188 | 0,099 | Retinal dehydrogenase inhibitor                                                            |
| 0,100 | 0,011 | Prostaglandin agonist                                                                      |
| 0,105 | 0,017 | Alpha,alpha-phosphotrehalase inhibitor                                                     |
| 0,188 | 0,100 | N-hydroxy-2-acetamidofluorene reductase inhibitor                                          |
| 0,196 | 0,108 | Gluconolactonase inhibitor                                                                 |
| 0,132 | 0,044 | Ribonuclease inhibitor                                                                     |
| 0,113 | 0,025 | High-mannose-oligosaccharide beta-1,4-N-acetylglucosaminyltransferase inhibitor            |
| 0,139 | 0,051 | UDP-N-acetylglucosamine-dolichyl-phosphate N-acetylglucosaminephosphotransferase inhibitor |

|       |       |                                                            |
|-------|-------|------------------------------------------------------------|
| 0,154 | 0,067 | Cerebroside-sulfatase inhibitor                            |
| 0,107 | 0,019 | Cushing's syndrome treatment                               |
| 0,166 | 0,078 | N-methyl-2-oxoglutaramate hydrolase inhibitor              |
| 0,131 | 0,044 | Fructose-2,6-bisphosphate 6-phosphatase inhibitor          |
| 0,118 | 0,031 | Ribonuclease U2 inhibitor                                  |
| 0,148 | 0,061 | Glucuronolactone reductase inhibitor                       |
| 0,093 | 0,007 | Actin depolymerization stimulant                           |
| 0,142 | 0,055 | Prolactin inhibitor                                        |
| 0,113 | 0,027 | Sterol 24-C-methyltransferase inhibitor                    |
| 0,177 | 0,091 | Tauropine dehydrogenase inhibitor                          |
| 0,119 | 0,033 | 3-Oxosteroid 1-dehydrogenase inhibitor                     |
| 0,092 | 0,007 | CYP24 inhibitor                                            |
| 0,125 | 0,039 | Polynucleotide adenylyltransferase inhibitor               |
| 0,123 | 0,038 | 1,5-Anhydro-D-fructose reductase inhibitor                 |
| 0,120 | 0,035 | Glyceraldehyde-3-phosphate dehydrogenase (NADP+) inhibitor |
| 0,104 | 0,019 | CYP4F12 substrate                                          |
| 0,136 | 0,051 | Fructose-2,6-bisphosphate 2-phosphatase inhibitor          |
| 0,104 | 0,019 | Steroid sulfotransferase inhibitor                         |
| 0,107 | 0,022 | 3(or 17)alpha-hydroxysteroid dehydrogenase inhibitor       |
| 0,100 | 0,016 | Butyrylcholinesterase inhibitor                            |
| 0,129 | 0,044 | DNA nucleotidylexotransferase inhibitor                    |
| 0,112 | 0,027 | Inositol-3-phosphate synthase inhibitor                    |
| 0,144 | 0,060 | Glutathione S-transferase substrate                        |
| 0,150 | 0,066 | Cyclamate sulfohydrolase inhibitor                         |
| 0,159 | 0,075 | IgA-specific metalloendopeptidase inhibitor                |
| 0,195 | 0,111 | NADH kinase inhibitor                                      |
| 0,146 | 0,063 | Dolichyl-phosphatase inhibitor                             |
| 0,209 | 0,126 | Antiparkinsonian, rigidity relieving                       |
| 0,158 | 0,075 | 3'-Nucleotidase inhibitor                                  |
| 0,109 | 0,027 | Long-chain-fatty-acid-CoA ligase inhibitor                 |
| 0,095 | 0,012 | Hyperparathyroidism treatment                              |
| 0,162 | 0,080 | Snapalysin inhibitor                                       |
| 0,143 | 0,061 | Acetyl-CoA C-acyltransferase inhibitor                     |
| 0,095 | 0,013 | Acetylcholine muscarinic agonist                           |
| 0,229 | 0,148 | CYP1A substrate                                            |
| 0,123 | 0,041 | 2-Dehydropantolactone reductase (A-specific) inhibitor     |
| 0,278 | 0,196 | Sulfur reductase inhibitor                                 |

|       |       |                                                           |
|-------|-------|-----------------------------------------------------------|
| 0,139 | 0,057 | Agmatinase inhibitor                                      |
| 0,132 | 0,051 | NADH dehydrogenase inhibitor                              |
| 0,098 | 0,017 | Protein 50S ribosomal subunit inhibitor                   |
| 0,182 | 0,101 | Di-trans,poly-cis-decaprenylcistransferase inhibitor      |
| 0,227 | 0,146 | Tyrosine 3 hydroxylase inhibitor                          |
| 0,096 | 0,015 | ACK1 kinase inhibitor                                     |
| 0,201 | 0,120 | Glutaminyl-peptide cyclotransferase inhibitor             |
| 0,140 | 0,061 | Protein-S-isoprenylcysteine O-methyltransferase inhibitor |
| 0,155 | 0,075 | Calcium-sensing receptor agonist                          |
| 0,091 | 0,011 | UGT2B4D substrate                                         |
| 0,091 | 0,011 | UGT2B4E substrate                                         |
| 0,091 | 0,011 | UGT2B19 substrate                                         |
| 0,091 | 0,011 | UGT2B23 substrate                                         |
| 0,091 | 0,011 | UGT2B30 substrate                                         |
| 0,147 | 0,068 | Anesthetic local                                          |
| 0,127 | 0,048 | Heparan-alpha-glucosaminide N-acetyltransferase inhibitor |
| 0,138 | 0,059 | Glycogen (starch) synthase inhibitor                      |
| 0,130 | 0,052 | Trimethyllysine dioxygenase inhibitor                     |
| 0,168 | 0,089 | Leucine dehydrogenase inhibitor                           |
| 0,121 | 0,043 | Aconitate decarboxylase inhibitor                         |
| 0,168 | 0,090 | Phosphatidylglycerophosphatase inhibitor                  |
| 0,117 | 0,039 | Bis(5'-adenosyl)-triphosphatase inhibitor                 |
| 0,145 | 0,067 | Dry eye syndrome treatment                                |
| 0,127 | 0,049 | Lysozyme inhibitor                                        |
| 0,145 | 0,068 | Trans-1,2-dihydrobenzene-1,2-diol dehydrogenase inhibitor |
| 0,096 | 0,020 | mRNA (guanine-N7-)-methyltransferase inhibitor            |
| 0,158 | 0,081 | CYP2B1 substrate                                          |
| 0,113 | 0,036 | Gluconokinase inhibitor                                   |
| 0,219 | 0,143 | Peptidyl-dipeptidase Dcp inhibitor                        |
| 0,108 | 0,032 | Homoserine O-succinyltransferase inhibitor                |
| 0,238 | 0,162 | Antiprotozoal (Trypanosoma)                               |
| 0,152 | 0,075 | Farnesyltranstransferase inhibitor                        |
| 0,134 | 0,058 | Deoxyribose-phosphate aldolase inhibitor                  |
| 0,118 | 0,042 | CMP-N-acetylneuraminate monooxygenase inhibitor           |
| 0,169 | 0,094 | Antileukemic                                              |
| 0,117 | 0,042 | GABA transporter 3 inhibitor                              |
| 0,168 | 0,093 | Antiprotozoal (Plasmodium)                                |

|       |       |                                                                  |
|-------|-------|------------------------------------------------------------------|
| 0,165 | 0,089 | Glutamate 5-kinase inhibitor                                     |
| 0,143 | 0,068 | Antibacterial, ophthalmic                                        |
| 0,106 | 0,031 | Xylan 1,4-beta-xylosidase inhibitor                              |
| 0,115 | 0,040 | Threonine ammonia-lyase inhibitor                                |
| 0,107 | 0,032 | Beta-N-acetylhexosaminidase inhibitor                            |
| 0,183 | 0,108 | Nucleoside oxidase (H2O2-forming) inhibitor                      |
| 0,089 | 0,015 | Glutathione reductase stimulant                                  |
| 0,089 | 0,015 | Glutathione reductase (NADPH) stimulant                          |
| 0,144 | 0,070 | Phosphoinositide phospholipase C inhibitor                       |
| 0,113 | 0,039 | Oligo-1,6-glucosidase inhibitor                                  |
| 0,124 | 0,049 | Galactoside 2-alpha-L-fucosyltransferase inhibitor               |
| 0,107 | 0,033 | L-fuconate dehydratase inhibitor                                 |
| 0,086 | 0,012 | Corticotropin releasing factor antagonist                        |
| 0,099 | 0,026 | Opioid mu 2 receptor antagonist                                  |
| 0,198 | 0,125 | Photosensitizer                                                  |
| 0,119 | 0,046 | Heat shock protein antagonist                                    |
| 0,129 | 0,056 | NAD+ kinase inhibitor                                            |
| 0,170 | 0,097 | GABA C receptor agonist                                          |
| 0,115 | 0,042 | Acetylcholine agonist                                            |
| 0,134 | 0,062 | Glucosamine-6-phosphate deaminase inhibitor                      |
| 0,129 | 0,057 | Estrone sulfotransferase inhibitor                               |
| 0,243 | 0,170 | Hydroxylamine oxidase inhibitor                                  |
| 0,090 | 0,018 | Androgen agonist                                                 |
| 0,176 | 0,104 | Carboxypeptidase D inhibitor                                     |
| 0,093 | 0,021 | Steroid DELTA-isomerase inhibitor                                |
| 0,129 | 0,058 | Poly(ADP-ribose) glycohydrolase inhibitor                        |
| 0,185 | 0,114 | S-alkylcysteine lyase inhibitor                                  |
| 0,287 | 0,216 | Taurine dehydrogenase inhibitor                                  |
| 0,297 | 0,226 | Heat shock protein 27 antagonist                                 |
| 0,077 | 0,006 | Peptidyl-prolyl cis-trans isomerase inhibitor                    |
| 0,112 | 0,041 | Cell wall synthesis inhibitor                                    |
| 0,077 | 0,006 | Na+ K+ transporting ATPase inhibitor                             |
| 0,239 | 0,168 | Mitochondrial processing peptidase inhibitor                     |
| 0,095 | 0,025 | Dextranucrase inhibitor                                          |
| 0,099 | 0,029 | Alpha,alpha-trehalose-phosphate synthase (UDP-forming) inhibitor |
| 0,130 | 0,060 | Bacterial efflux pump inhibitor                                  |
| 0,110 | 0,040 | Capillary fragility treatment                                    |

|       |       |                                                      |
|-------|-------|------------------------------------------------------|
| 0,170 | 0,101 | GST P1-1 substrate                                   |
| 0,137 | 0,068 | Saccharolysin inhibitor                              |
| 0,152 | 0,083 | N6-methyl-lysine oxidase inhibitor                   |
| 0,142 | 0,073 | Aryl sulfotransferase inhibitor                      |
| 0,131 | 0,063 | UGT2B1 substrate                                     |
| 0,133 | 0,064 | D-lactate dehydrogenase inhibitor                    |
| 0,073 | 0,004 | Rotamase (FKBP) inhibitor                            |
| 0,095 | 0,027 | SULT2A1 substrate                                    |
| 0,133 | 0,066 | Biotin carboxylase inhibitor                         |
| 0,147 | 0,080 | Penicillopepsin inhibitor                            |
| 0,074 | 0,007 | Sucrose phosphorylase inhibitor                      |
| 0,192 | 0,125 | Levansucrase inhibitor                               |
| 0,154 | 0,087 | Phosphatidate phosphatase inhibitor                  |
| 0,247 | 0,180 | Cell adhesion molecule inhibitor                     |
| 0,103 | 0,037 | Galactosylgalactosylglucosylceramidase inhibitor     |
| 0,143 | 0,077 | Psychosexual dysfunction treatment                   |
| 0,110 | 0,044 | Acetylcholine M2 receptor agonist                    |
| 0,118 | 0,052 | Chondroitin 6-sulfotransferase inhibitor             |
| 0,128 | 0,062 | ATP adenylyltransferase inhibitor                    |
| 0,079 | 0,013 | DNA directed RNA polymerase stimulant                |
| 0,122 | 0,057 | (S)-carnitine 3-dehydrogenase inhibitor              |
| 0,079 | 0,014 | Sucrose-phosphate phosphatase inhibitor              |
| 0,089 | 0,024 | Protein 30S ribosomal subunit inhibitor              |
| 0,259 | 0,194 | Mycothiol-S-conjugate amidase inhibitor              |
| 0,165 | 0,100 | Crotonoyl-[acyl-carrier-protein] hydratase inhibitor |
| 0,156 | 0,091 | Arylamine N-acetyltransferase inhibitor              |
| 0,186 | 0,121 | Hemostatic                                           |
| 0,098 | 0,034 | Phosphorylase kinase inhibitor                       |
| 0,168 | 0,104 | Fibromyalgia syndrome treatment                      |
| 0,095 | 0,031 | 3-Dehydroquinone dehydratase inhibitor               |
| 0,123 | 0,059 | Glycoprotein 3-alpha-L-fucosyltransferase inhibitor  |
| 0,143 | 0,079 | Sepsis treatment                                     |
| 0,111 | 0,048 | Phosphofructokinase-1 inhibitor                      |
| 0,179 | 0,116 | Acyl-CoA oxidase inhibitor                           |
| 0,221 | 0,158 | CYP1A inhibitor                                      |
| 0,202 | 0,138 | Skeletal muscle relaxant                             |
| 0,133 | 0,070 | Thiamine-phosphate kinase inhibitor                  |

|       |       |                                                                |
|-------|-------|----------------------------------------------------------------|
| 0,066 | 0,003 | Alpha 1L adrenoreceptor antagonist                             |
| 0,083 | 0,020 | ATP diphosphatase inhibitor                                    |
| 0,117 | 0,054 | Antispirochetal                                                |
| 0,164 | 0,101 | CTGF expression inhibitor                                      |
| 0,249 | 0,186 | Histamine release inhibitor                                    |
| 0,143 | 0,081 | Shikimate 5-dehydrogenase inhibitor                            |
| 0,141 | 0,078 | 3-Carboxyethylcatechol 2,3-dioxygenase inhibitor               |
| 0,205 | 0,142 | Chloride channel blocker                                       |
| 0,204 | 0,142 | Pyruvate decarboxylase inhibitor                               |
| 0,175 | 0,113 | Peptidyl-dipeptidase B inhibitor                               |
| 0,112 | 0,049 | Thermomycin inhibitor                                          |
| 0,096 | 0,034 | 11-Cis-retinyl-palmitate hydrolase inhibitor                   |
| 0,077 | 0,015 | Biotin-[methylmalonyl-CoA-carboxytransferase] ligase inhibitor |
| 0,130 | 0,069 | Alcohol dehydrogenase substrate                                |
| 0,110 | 0,048 | Valine dehydrogenase (NADP+) inhibitor                         |
| 0,096 | 0,034 | 3(or 17)beta-hydroxysteroid dehydrogenase inhibitor            |
| 0,191 | 0,130 | L-threonine 3-dehydrogenase inhibitor                          |
| 0,107 | 0,046 | Leukocyte elastase inhibitor                                   |
| 0,121 | 0,060 | Glucarate dehydratase inhibitor                                |
| 0,102 | 0,041 | Cellobiose phosphorylase inhibitor                             |
| 0,125 | 0,065 | Isovaleryl-CoA dehydrogenase inhibitor                         |
| 0,109 | 0,048 | Tyrosine-protein kinase TYRO 10 inhibitor                      |
| 0,195 | 0,135 | Arylmalonate decarboxylase inhibitor                           |
| 0,081 | 0,021 | UGT2B20 substrate                                              |
| 0,088 | 0,028 | Peptidoglycan beta-N-acetylmuramidase inhibitor                |
| 0,127 | 0,068 | Cathepsin H inhibitor                                          |
| 0,156 | 0,096 | Dolichol kinase inhibitor                                      |
| 0,145 | 0,086 | Homoserine dehydrogenase inhibitor                             |
| 0,103 | 0,043 | T cell inhibitor                                               |
| 0,092 | 0,033 | Amylo-alpha-1,6-glucosidase inhibitor                          |
| 0,098 | 0,039 | CYP26 substrate                                                |
| 0,128 | 0,069 | (S)-2-hydroxy-acid oxidase inhibitor                           |
| 0,137 | 0,079 | Hepatocyte nuclear factor antagonist                           |
| 0,137 | 0,079 | Hepatocyte nuclear factor 4 alpha antagonist                   |
| 0,134 | 0,075 | Alpha-Methylacyl-CoA racemase inhibitor                        |
| 0,102 | 0,043 | Fructuronate reductase inhibitor                               |
| 0,102 | 0,043 | Tagaturonate reductase inhibitor                               |

|       |       |                                                    |
|-------|-------|----------------------------------------------------|
| 0,233 | 0,175 | Diuretic inhibitor                                 |
| 0,128 | 0,070 | Pancreatic endopeptidase E inhibitor               |
| 0,188 | 0,130 | Endopeptidase La inhibitor                         |
| 0,072 | 0,014 | CYP17 substrate                                    |
| 0,168 | 0,110 | Ornithine cyclodeaminase inhibitor                 |
| 0,111 | 0,053 | Poly(3-hydroxybutyrate) depolymerase inhibitor     |
| 0,150 | 0,092 | Isopenicillin-N synthase inhibitor                 |
| 0,175 | 0,118 | Cyclohexyl-isocyanide hydratase inhibitor          |
| 0,120 | 0,063 | Bronchodilator                                     |
| 0,178 | 0,121 | Protein-synthesizing GTPase inhibitor              |
| 0,110 | 0,055 | Sorbose dehydrogenase inhibitor                    |
| 0,100 | 0,044 | Hair growth stimulant                              |
| 0,109 | 0,054 | Adenylylsulphatase inhibitor                       |
| 0,070 | 0,015 | CYP24 substrate                                    |
| 0,206 | 0,151 | Methylumbelliferyl-acetate deacetylase inhibitor   |
| 0,073 | 0,018 | Glycine N-choloyltransferase inhibitor             |
| 0,194 | 0,139 | Trimethylamine dehydrogenase inhibitor             |
| 0,117 | 0,062 | Adenylate cyclase V inhibitor                      |
| 0,165 | 0,111 | Free radical scavenger                             |
| 0,206 | 0,152 | N-benzyloxycarbonylglycine hydrolase inhibitor     |
| 0,186 | 0,132 | Coccolysin inhibitor                               |
| 0,101 | 0,047 | UDP-N-acetylglucosamine diphosphorylase inhibitor  |
| 0,068 | 0,014 | Microtubule stabilization                          |
| 0,155 | 0,101 | Tentoxilysin inhibitor                             |
| 0,148 | 0,095 | 3-Hydroxy-4-oxoquinoline 2,4-dioxygenase inhibitor |
| 0,126 | 0,073 | Allantoinase inhibitor                             |
| 0,185 | 0,133 | Arylesterase inhibitor                             |
| 0,158 | 0,106 | CYP4A2 substrate                                   |
| 0,124 | 0,072 | Glutamate-1-semialdehyde 2,1-aminomutase inhibitor |
| 0,155 | 0,103 | Procollagen N-endopeptidase inhibitor              |
| 0,074 | 0,021 | Glucan 1,4-alpha-glucosidase inhibitor             |
| 0,208 | 0,156 | Farnesoid X receptor antagonist                    |
| 0,076 | 0,024 | D-Serine ammonia-lyase inhibitor                   |
| 0,090 | 0,038 | Paget's disease treatment                          |
| 0,071 | 0,019 | Amylosucrase inhibitor                             |
| 0,138 | 0,086 | Phenylacetate-CoA ligase inhibitor                 |
| 0,122 | 0,070 | Acyl-lysine deacylase inhibitor                    |

|       |       |                                                                |
|-------|-------|----------------------------------------------------------------|
| 0,137 | 0,085 | Heat shock protein agonist                                     |
| 0,128 | 0,077 | Succinic dehydrogenase inhibitor                               |
| 0,222 | 0,171 | CYP1A2 substrate                                               |
| 0,205 | 0,155 | DNA-(apurinic or apyrimidinic site) lyase inhibitor            |
| 0,130 | 0,079 | Mannan endo-1,6-alpha-mannosidase inhibitor                    |
| 0,103 | 0,052 | CYP1B1 inhibitor                                               |
| 0,184 | 0,133 | 1-Alkylglycerophosphocholine O-acetyltransferase inhibitor     |
| 0,202 | 0,152 | NADPH-ferrihemoprotein reductase inhibitor                     |
| 0,071 | 0,021 | Deoxyadenosine kinase inhibitor                                |
| 0,108 | 0,058 | Choline dehydrogenase inhibitor                                |
| 0,100 | 0,050 | Acetylcholine nicotinic antagonist                             |
| 0,078 | 0,029 | Protein kinase C mu inhibitor                                  |
| 0,201 | 0,152 | ATPase stimulant                                               |
| 0,138 | 0,089 | Trans-pentaprenyltranstransferase inhibitor                    |
| 0,084 | 0,035 | 3-Dehydroquinate synthase inhibitor                            |
| 0,096 | 0,048 | Heat shock protein 90 antagonist                               |
| 0,118 | 0,070 | Sulfate adenylyltransferase (ADP) inhibitor                    |
| 0,060 | 0,012 | Androst-4-ene-3,17-dione monooxygenase inhibitor               |
| 0,158 | 0,110 | (S)-3-amino-2-methylpropionate transaminase inhibitor          |
| 0,092 | 0,045 | [hydroxymethylglutaryl-CoA reductase (NADPH)] kinase inhibitor |
| 0,159 | 0,112 | Gastritis treatment                                            |
| 0,054 | 0,006 | ATPase (Vacuolar H <sup>+</sup> ) inhibitor                    |
| 0,094 | 0,046 | 2-Methyleneglutarate mutase inhibitor                          |
| 0,097 | 0,050 | Galactosylceramide sulfotransferase inhibitor                  |
| 0,144 | 0,097 | Polynucleotide 5'-hydroxy-kinase inhibitor                     |
| 0,173 | 0,126 | Aspartate-ammonia ligase inhibitor                             |
| 0,117 | 0,070 | Asparagine-tRNA ligase inhibitor                               |
| 0,070 | 0,023 | Antibiotic Aminoglycoside-like                                 |
| 0,108 | 0,060 | Omega-amidase inhibitor                                        |
| 0,094 | 0,047 | Arabinose isomerase inhibitor                                  |
| 0,124 | 0,077 | Nitric oxide antagonist                                        |
| 0,090 | 0,044 | Malate dehydrogenase (NADP <sup>+</sup> ) inhibitor            |
| 0,196 | 0,150 | Myosin ATPase inhibitor                                        |
| 0,101 | 0,054 | Glutamine-pyruvate transaminase inhibitor                      |
| 0,092 | 0,045 | Shock treatment                                                |
| 0,111 | 0,065 | Liver cirrhosis treatment                                      |
| 0,207 | 0,162 | Arylsulfate sulfotransferase inhibitor                         |

|       |       |                                                            |
|-------|-------|------------------------------------------------------------|
| 0,140 | 0,094 | GDP-mannose 6-dehydrogenase inhibitor                      |
| 0,181 | 0,135 | Dactylisin inhibitor                                       |
| 0,090 | 0,045 | Diacylglycerol O-acyltransferase inhibitor                 |
| 0,180 | 0,135 | Carbon-monoxide dehydrogenase inhibitor                    |
| 0,088 | 0,042 | Amino-acid racemase inhibitor                              |
| 0,098 | 0,053 | Inositol-polyphosphate 5-phosphatase inhibitor             |
| 0,089 | 0,045 | 2-Methylcitrate synthase inhibitor                         |
| 0,191 | 0,146 | Anti-Helicobacter pylori                                   |
| 0,071 | 0,026 | Opioid mu 1 receptor antagonist                            |
| 0,121 | 0,077 | Valine decarboxylase inhibitor                             |
| 0,115 | 0,070 | Carboxymethylenebutenolidase inhibitor                     |
| 0,068 | 0,024 | Glucan 1,3-alpha-glucosidase inhibitor                     |
| 0,084 | 0,040 | Glutaminyl-tRNA synthase (glutamine-hydrolysing) inhibitor |
| 0,101 | 0,057 | Beta amyloid protein antagonist                            |
| 0,160 | 0,116 | Glycerol 2-dehydrogenase (NADP+) inhibitor                 |
| 0,094 | 0,050 | 3-Deoxy-8-phosphooctulonate synthase inhibitor             |
| 0,103 | 0,059 | Malonate-semialdehyde dehydrogenase inhibitor              |
| 0,064 | 0,020 | Protein kinase C nu inhibitor                              |
| 0,113 | 0,069 | Aspartate kinase inhibitor                                 |
| 0,062 | 0,018 | CYP3A11 substrate                                          |
| 0,088 | 0,045 | Deoxycytidine kinase inhibitor                             |
| 0,076 | 0,033 | [acetyl-CoA carboxylase] kinase inhibitor                  |
| 0,126 | 0,083 | 5 Hydroxytryptamine 2A agonist                             |
| 0,182 | 0,139 | Leukotriene-B4 20-monooxygenase inhibitor                  |
| 0,166 | 0,123 | Dimethylmaleate hydratase inhibitor                        |
| 0,205 | 0,162 | Venom exonuclease inhibitor                                |
| 0,075 | 0,032 | Malate synthase inhibitor                                  |
| 0,125 | 0,082 | N-acetylneuraminate synthase inhibitor                     |
| 0,085 | 0,043 | Cyanate hydratase inhibitor                                |
| 0,053 | 0,012 | CYP4F8 substrate                                           |
| 0,190 | 0,148 | Gamma-glutamyltransferase inhibitor                        |
| 0,087 | 0,046 | 2-Methylcitrate dehydratase inhibitor                      |
| 0,100 | 0,060 | Creatinase inhibitor                                       |
| 0,117 | 0,077 | O-acetylhomoserine aminocarboxypropyltransferase inhibitor |
| 0,102 | 0,061 | tRNA (cytosine-5-)-methyltransferase inhibitor             |
| 0,156 | 0,117 | Endopeptidase inhibitor                                    |
| 0,065 | 0,026 | 3'(2'),5'-Bisphosphate nucleotidase inhibitor              |

|       |       |                                                                                             |
|-------|-------|---------------------------------------------------------------------------------------------|
| 0,130 | 0,091 | Glutamin-(asparagin-)ase inhibitor                                                          |
| 0,082 | 0,044 | Propanediol dehydratase inhibitor                                                           |
| 0,081 | 0,042 | 2-Dehydro-3-deoxy-phosphogluconate aldolase inhibitor                                       |
| 0,146 | 0,108 | Hydroxymethylglutaryl-CoA lyase inhibitor                                                   |
| 0,175 | 0,137 | Uroporphyrinogen-III synthase inhibitor                                                     |
| 0,101 | 0,063 | UDP-glucose 4-epimerase inhibitor                                                           |
| 0,068 | 0,030 | 1-Alkyl-2-acetylgllycerol O-acyltransferase inhibitor                                       |
| 0,122 | 0,085 | FMN reductase inhibitor                                                                     |
| 0,092 | 0,054 | UDP-N-acetylglucosamine 2-epimerase inhibitor                                               |
| 0,054 | 0,017 | NADPH oxidoreductase inhibitor                                                              |
| 0,053 | 0,015 | Dichloromethane dehalogenase inhibitor                                                      |
| 0,068 | 0,030 | NMDA receptor polyamine site agonist                                                        |
| 0,070 | 0,033 | Chitin deacetylase inhibitor                                                                |
| 0,067 | 0,030 | Lipocortins synthesis agonist                                                               |
| 0,107 | 0,070 | Serine 3-dehydrogenase inhibitor                                                            |
| 0,095 | 0,058 | Glycerophosphocholine cholinephosphodiesterase inhibitor                                    |
| 0,193 | 0,156 | Monoamine uptake inhibitor                                                                  |
| 0,051 | 0,014 | Adenylate cyclase I inhibitor                                                               |
| 0,097 | 0,060 | Monocarboxylic acid transporter 1 inhibitor                                                 |
| 0,097 | 0,060 | Monocarboxylic acid transporter inhibitor                                                   |
| 0,083 | 0,046 | Vitamin                                                                                     |
| 0,130 | 0,093 | Adenylate kinase inhibitor                                                                  |
| 0,118 | 0,082 | Cholinergic                                                                                 |
| 0,102 | 0,066 | CYP1A3 substrate                                                                            |
| 0,101 | 0,065 | Glycoprotein-fucosylgalactoside alpha-N-acetylgalactosaminyltransferase inhibitor           |
| 0,093 | 0,057 | Beta-N-acetylgalactosaminidase inhibitor                                                    |
| 0,118 | 0,082 | 3-Isopropylmalate dehydratase inhibitor                                                     |
| 0,078 | 0,043 | N-acetylglucosaminyldiphosphoundecaprenol N-acetyl-beta-D-mannosaminyltransferase inhibitor |
| 0,110 | 0,075 | Mevalonate kinase inhibitor                                                                 |
| 0,127 | 0,091 | Dihydrouracil dehydrogenase (NAD+) inhibitor                                                |
| 0,068 | 0,033 | Beta galactosidase inhibitor                                                                |
| 0,106 | 0,071 | L-galactonolactone oxidase inhibitor                                                        |
| 0,064 | 0,029 | CMP-KDO synthase inhibitor                                                                  |
| 0,119 | 0,084 | Radical formation agonist                                                                   |
| 0,136 | 0,101 | Guanylate cyclase 1 stimulant                                                               |
| 0,110 | 0,076 | Methionine decarboxylase inhibitor                                                          |
| 0,078 | 0,044 | (S)-2-Methylmalate dehydratase inhibitor                                                    |

|       |       |                                                                       |
|-------|-------|-----------------------------------------------------------------------|
| 0,077 | 0,044 | CYP2C2 substrate                                                      |
| 0,047 | 0,013 | Cholesterol absorption inhibitor                                      |
| 0,132 | 0,098 | Choline-sulfatase inhibitor                                           |
| 0,050 | 0,017 | Electron transport complex I inhibitor                                |
| 0,096 | 0,062 | Thiamine-phosphate diphosphorylase inhibitor                          |
| 0,116 | 0,083 | Nav1.3 sodium channel blocker                                         |
| 0,092 | 0,059 | 2-Hydroxy-3-oxopropionate reductase inhibitor                         |
| 0,121 | 0,088 | Ca <sup>2+</sup> /calmodulin-dependent kinase I inhibitor             |
| 0,063 | 0,031 | Chalcone isomerase inhibitor                                          |
| 0,082 | 0,049 | S-methyl-5-thioribose kinase inhibitor                                |
| 0,034 | 0,002 | Actin polymerization inhibitor                                        |
| 0,162 | 0,130 | Gamma-D-Glutamyl-meso-diaminopimelate peptidase inhibitor             |
| 0,102 | 0,070 | Site-specific DNA-methyltransferase (adenine-specific) inhibitor      |
| 0,077 | 0,046 | 4a-Hydroxytetrahydrobiopterin dehydratase inhibitor                   |
| 0,083 | 0,052 | 2-Oxoaldehyde dehydrogenase (NAD <sup>+</sup> ) inhibitor             |
| 0,184 | 0,153 | Apoptosis antagonist                                                  |
| 0,166 | 0,135 | Opheline kinase inhibitor                                             |
| 0,166 | 0,135 | Taurocyamine kinase inhibitor                                         |
| 0,094 | 0,063 | Alpha,alpha-trehalase inhibitor                                       |
| 0,062 | 0,031 | Biotin-[propionyl-CoA-carboxylase (ATP-hydrolysing)] ligase inhibitor |
| 0,167 | 0,137 | Ferredoxin hydrogenase inhibitor                                      |
| 0,115 | 0,085 | Diisopropyl-fluorophosphatase inhibitor                               |
| 0,081 | 0,051 | Glycosylceramidase inhibitor                                          |
| 0,051 | 0,021 | Pregnane X receptor antagonist                                        |
| 0,050 | 0,020 | Orotidylate decarboxylase inhibitor                                   |
| 0,103 | 0,073 | Glucose 1-dehydrogenase inhibitor                                     |
| 0,146 | 0,116 | Uterine stimulant                                                     |
| 0,095 | 0,066 | Gluconate dehydratase inhibitor                                       |
| 0,177 | 0,147 | Wound healing agent                                                   |
| 0,125 | 0,095 | Obsessive-compulsive disorder treatment                               |
| 0,191 | 0,162 | Pancreatic ribonuclease inhibitor                                     |
| 0,088 | 0,059 | Alcohol oxidase inhibitor                                             |
| 0,055 | 0,026 | HCV NS3/NS4A protease inhibitor                                       |
| 0,182 | 0,153 | ATP phosphoribosyltransferase inhibitor                               |
| 0,100 | 0,071 | Sarcosine oxidase inhibitor                                           |
| 0,079 | 0,050 | N-acetylglucosamine-6-phosphate deacetylase inhibitor                 |
| 0,139 | 0,110 | Antimutagenic                                                         |

|       |       |                                                                                  |
|-------|-------|----------------------------------------------------------------------------------|
| 0,168 | 0,139 | Antiviral (Hepatitis B)                                                          |
| 0,099 | 0,070 | Antifungal enhancer                                                              |
| 0,089 | 0,061 | Neuropeptide FF agonist                                                          |
| 0,089 | 0,061 | Neuropeptide FF2 agonist                                                         |
| 0,136 | 0,107 | Benzoylformate decarboxylase inhibitor                                           |
| 0,170 | 0,142 | Glycine amidinotransferase inhibitor                                             |
| 0,098 | 0,070 | Aerobactin synthase inhibitor                                                    |
| 0,110 | 0,083 | Malate-CoA ligase inhibitor                                                      |
| 0,067 | 0,039 | Phosphoglucomutase inhibitor                                                     |
| 0,090 | 0,063 | 2-Aminoethylphosphonate-pyruvate transaminase inhibitor                          |
| 0,075 | 0,048 | 6-Phosphofructo-2-kinase inhibitor                                               |
| 0,078 | 0,051 | Nav1.7 sodium channel blocker                                                    |
| 0,169 | 0,142 | Nardilysin inhibitor                                                             |
| 0,104 | 0,077 | Phosphonoacetate hydrolase inhibitor                                             |
| 0,037 | 0,010 | GRP78 expression inhibitor                                                       |
| 0,064 | 0,037 | Alpha-1,6-mannosyl-glycoprotein 2-beta-N-acetylglucosaminyltransferase inhibitor |
| 0,084 | 0,058 | Interleukin 1a antagonist                                                        |
| 0,030 | 0,004 | Antiprotozoal activity enhancer                                                  |
| 0,096 | 0,070 | Glycine receptor antagonist                                                      |
| 0,182 | 0,156 | Methane monooxygenase inhibitor                                                  |
| 0,067 | 0,041 | GMP synthase inhibitor                                                           |
| 0,034 | 0,008 | CYP27A1 inhibitor                                                                |
| 0,103 | 0,077 | Lactaldehyde reductase (NADPH) inhibitor                                         |
| 0,040 | 0,014 | Postcoital contraceptive                                                         |
| 0,135 | 0,110 | Lactate 2-monooxygenase inhibitor                                                |
| 0,081 | 0,055 | Neolactotetraosylceramide alpha-2,3-sialyltransferase inhibitor                  |
| 0,101 | 0,076 | Acetylcholine release stimulant                                                  |
| 0,043 | 0,018 | CYP7B substrate                                                                  |
| 0,043 | 0,018 | CYP7B1 substrate                                                                 |
| 0,091 | 0,066 | Mannonate dehydratase inhibitor                                                  |
| 0,120 | 0,096 | Diphosphomevalonate decarboxylase inhibitor                                      |
| 0,073 | 0,049 | Serine-tRNA ligase inhibitor                                                     |
| 0,058 | 0,034 | Prostaglandin-I synthase inhibitor                                               |
| 0,081 | 0,058 | Heat shock protein 70 antagonist                                                 |
| 0,160 | 0,136 | Meprin B inhibitor                                                               |
| 0,039 | 0,015 | Alpha-1,3-mannosyl-glycoprotein 2-beta-N-acetylglucosaminyltransferase inhibitor |
| 0,065 | 0,041 | Thioether S-methyltransferase inhibitor                                          |

|       |       |                                                                                 |
|-------|-------|---------------------------------------------------------------------------------|
| 0,028 | 0,005 | Rotamase (FKBP12) inhibitor                                                     |
| 0,132 | 0,109 | Acetate kinase inhibitor                                                        |
| 0,104 | 0,080 | 2-Aminoadipate transaminase inhibitor                                           |
| 0,191 | 0,167 | Ferredoxin-NAD <sup>+</sup> reductase inhibitor                                 |
| 0,191 | 0,167 | Naphthalene 1,2-dioxygenase inhibitor                                           |
| 0,213 | 0,190 | Nicotinate dehydrogenase inhibitor                                              |
| 0,111 | 0,088 | Aryl-alcohol dehydrogenase inhibitor                                            |
| 0,198 | 0,175 | Hypolipemic                                                                     |
| 0,085 | 0,062 | 2-Dehydro-3-deoxy-L-arabinonate dehydratase inhibitor                           |
| 0,073 | 0,051 | Hydroperoxide dehydratase inhibitor                                             |
| 0,067 | 0,044 | UDP-glucose 6-dehydrogenase inhibitor                                           |
| 0,033 | 0,011 | Cyclomaltodextrin glucanotransferase inhibitor                                  |
| 0,054 | 0,032 | Antifungal (Pneumocystis)                                                       |
| 0,080 | 0,058 | Isocitrate lyase inhibitor                                                      |
| 0,087 | 0,066 | Contraceptive male                                                              |
| 0,027 | 0,005 | Calcineurin inhibitor                                                           |
| 0,070 | 0,048 | Estrogen agonist                                                                |
| 0,094 | 0,073 | 1-Aminocyclopropane-1-carboxylate deaminase inhibitor                           |
| 0,098 | 0,077 | Sulfotransferase substrate                                                      |
| 0,043 | 0,021 | Glycolipid 2-alpha-mannosyltransferase inhibitor                                |
| 0,111 | 0,089 | 3-Oxo adipate enol-lactonase inhibitor                                          |
| 0,086 | 0,065 | Dichloromuconate cycloisomerase inhibitor                                       |
| 0,196 | 0,174 | FMO1 substrate                                                                  |
| 0,073 | 0,052 | Dihydrolipoamide S-acetyltransferase inhibitor                                  |
| 0,107 | 0,086 | Heat shock protein 70 agonist                                                   |
| 0,094 | 0,073 | Cytochrome-c3 hydrogenase inhibitor                                             |
| 0,092 | 0,071 | Homocysteine desulfhydrase inhibitor                                            |
| 0,071 | 0,050 | Sphingosine kinase inhibitor                                                    |
| 0,039 | 0,019 | Membrane-oligosaccharide glycerophosphotransferase inhibitor                    |
| 0,049 | 0,029 | N-acetylglucosaminyldiphosphodolichol N-acetylglucosaminyltransferase inhibitor |
| 0,218 | 0,198 | Endopeptidase So inhibitor                                                      |
| 0,081 | 0,061 | CMP-N-acylneuraminate phosphodiesterase inhibitor                               |
| 0,085 | 0,066 | CTP synthase inhibitor                                                          |
| 0,110 | 0,091 | Protein-tyrosine sulfotransferase inhibitor                                     |
| 0,108 | 0,089 | Pyruvate dehydrogenase inhibitor                                                |
| 0,168 | 0,149 | O-aminophenol oxidase inhibitor                                                 |
| 0,094 | 0,076 | Adenosylmethionine-8-amino-7-oxononanoate transaminase inhibitor                |

|       |       |                                                                                          |
|-------|-------|------------------------------------------------------------------------------------------|
| 0,092 | 0,073 | Glycerol-3-phosphate dehydrogenase (NAD+) inhibitor                                      |
| 0,090 | 0,071 | Malate dehydrogenase (oxaloacetate-decarboxylating) inhibitor                            |
| 0,097 | 0,078 | Malyl-CoA lyase inhibitor                                                                |
| 0,098 | 0,080 | NMDA receptor polyamine site antagonist                                                  |
| 0,164 | 0,146 | Diuretic                                                                                 |
| 0,063 | 0,045 | Beta-1,4-mannosyl-glycoprotein 4-beta-N-acetylglucosaminyltransferase inhibitor          |
| 0,082 | 0,065 | Proline dehydrogenase inhibitor                                                          |
| 0,050 | 0,032 | UDP-N-acetylglucosamine-lysosomal-enzyme N-acetylglucosaminophosphotransferase inhibitor |
| 0,112 | 0,094 | Acylglycerone-phosphate reductase inhibitor                                              |
| 0,144 | 0,126 | Metallocoarboxypeptidase D inhibitor                                                     |
| 0,038 | 0,020 | Cortisol sulfotransferase inhibitor                                                      |
| 0,232 | 0,215 | 5 Hydroxytryptamine release inhibitor                                                    |
| 0,071 | 0,054 | Phosphoribulokinase inhibitor                                                            |
| 0,104 | 0,087 | 2-Oxoisovalerate dehydrogenase (acylating) inhibitor                                     |
| 0,106 | 0,089 | Excitatory amino acid transporter EAAC1 inhibitor                                        |
| 0,114 | 0,097 | Galactoside O-acetyltransferase inhibitor                                                |
| 0,101 | 0,085 | Iduronate-2-sulfatase inhibitor                                                          |
| 0,118 | 0,102 | Glycine receptor agonist                                                                 |
| 0,117 | 0,100 | Candidapepsin inhibitor                                                                  |
| 0,088 | 0,072 | D-glutamate oxidase inhibitor                                                            |
| 0,175 | 0,159 | Hepatic disorders treatment                                                              |
| 0,078 | 0,062 | Homospermidine synthase inhibitor                                                        |
| 0,077 | 0,061 | N-acetylneuraminate lyase inhibitor                                                      |
| 0,059 | 0,043 | Shaker potassium channel blocker                                                         |
| 0,055 | 0,039 | Hydroxylysine kinase inhibitor                                                           |
| 0,067 | 0,052 | Antihypermotility                                                                        |
| 0,057 | 0,042 | Plus-end-directed kinesin ATPase inhibitor                                               |
| 0,157 | 0,141 | Thiol oxidase inhibitor                                                                  |
| 0,112 | 0,097 | Aldehyde dehydrogenase (NAD+) inhibitor                                                  |
| 0,060 | 0,045 | Methylthioadenosine nucleosidase inhibitor                                               |
| 0,091 | 0,076 | Glutamate (mGluR6) antagonist                                                            |
| 0,186 | 0,171 | Choline-phosphate cytidyltransferase inhibitor                                           |
| 0,028 | 0,013 | Cholesterol ester transfer protein antagonist                                            |
| 0,076 | 0,061 | [myelin basic protein]-arginine N-methyltransferase inhibitor                            |
| 0,044 | 0,029 | Thymidine-triphosphatase inhibitor                                                       |
| 0,108 | 0,093 | Aminocarboxymuconate-semialdehyde decarboxylase inhibitor                                |
| 0,050 | 0,035 | Acetylcholine M1 receptor agonist                                                        |

|       |       |                                                          |
|-------|-------|----------------------------------------------------------|
| 0,064 | 0,049 | Parathyroid hormone antagonist                           |
| 0,035 | 0,021 | Methionyl aminopeptidase 2 inhibitor                     |
| 0,087 | 0,072 | Granulocyte macrophage colony stimulating factor agonist |
| 0,084 | 0,069 | CYP2B4 substrate                                         |
| 0,035 | 0,021 | Protein phosphatase 2A inhibitor                         |
| 0,025 | 0,011 | Dopamine D2B antagonist                                  |
| 0,037 | 0,023 | Glucose-6-phosphate isomerase inhibitor                  |
| 0,073 | 0,059 | Polyamine biosynthesis inhibitor                         |
| 0,038 | 0,024 | Endo-beta-N-acetylglucosaminidase inhibitor              |
| 0,142 | 0,128 | Prenyl-diphosphatase inhibitor                           |
| 0,119 | 0,106 | Granzyme A inhibitor                                     |
| 0,063 | 0,050 | Glycerol kinase inhibitor                                |
| 0,165 | 0,152 | Hydroxylamine reductase inhibitor                        |
| 0,125 | 0,111 | MDM2 inhibitor                                           |
| 0,099 | 0,086 | Decylcitrate synthase inhibitor                          |
| 0,132 | 0,119 | Glutathione reductase inhibitor                          |
| 0,027 | 0,013 | Antihyperaldosteronism                                   |
| 0,046 | 0,034 | Aromatase inhibitor                                      |
| 0,132 | 0,119 | Antileprosy                                              |
| 0,042 | 0,029 | ADAM10 endopeptidase inhibitor                           |
| 0,044 | 0,032 | Acetylcholine M4 receptor agonist                        |
| 0,123 | 0,110 | tRNA nucleotidyltransferase inhibitor                    |
| 0,063 | 0,050 | CYP2A13 substrate                                        |
| 0,111 | 0,099 | Iron-cytochrome-c reductase inhibitor                    |
| 0,168 | 0,155 | TRPA1 agonist                                            |
| 0,139 | 0,127 | 2,6-Dihydroxypyridine 3-monooxygenase inhibitor          |
| 0,119 | 0,107 | Vomilenine glucosyltransferase inhibitor                 |
| 0,120 | 0,108 | Sphinganine-1-phosphate aldolase inhibitor               |
| 0,046 | 0,034 | Dopamine transporter inhibitor                           |
| 0,116 | 0,104 | HIV-2 reverse transcriptase inhibitor                    |
| 0,038 | 0,026 | Glucosylceramidase inhibitor                             |
| 0,066 | 0,054 | Cellulose synthase (UDP-forming) inhibitor               |
| 0,025 | 0,013 | CYP27A substrate                                         |
| 0,104 | 0,093 | Nav1.2 sodium channel blocker                            |
| 0,022 | 0,011 | Ketosteroid monooxygenase inhibitor                      |
| 0,183 | 0,172 | CYP2C3 substrate                                         |
| 0,038 | 0,027 | Tartrate decarboxylase inhibitor                         |

|       |       |                                                                |
|-------|-------|----------------------------------------------------------------|
| 0,028 | 0,017 | Alpha glucosidase I inhibitor                                  |
| 0,044 | 0,033 | D(-)-tartrate dehydratase inhibitor                            |
| 0,055 | 0,045 | Urate transporter 1 inhibitor                                  |
| 0,055 | 0,045 | 1-Phosphofructokinase inhibitor                                |
| 0,075 | 0,064 | tRNA (guanine-N2-)-methyltransferase inhibitor                 |
| 0,024 | 0,013 | Alpha galactosidase inhibitor                                  |
| 0,066 | 0,055 | Lactate-malate transhydrogenase inhibitor                      |
| 0,136 | 0,126 | Penicillin amidase inhibitor                                   |
| 0,120 | 0,110 | Mitochondrial intermediate peptidase inhibitor                 |
| 0,070 | 0,060 | Trans-octaprenyltranstransferase inhibitor                     |
| 0,358 | 0,348 | Gluconate 2-dehydrogenase (acceptor) inhibitor                 |
| 0,057 | 0,047 | Quinate 5-dehydrogenase inhibitor                              |
| 0,052 | 0,043 | Protein N-acetylglucosaminyltransferase inhibitor              |
| 0,094 | 0,084 | Guanidinodeoxy-scylo-inositol-4-phosphatase inhibitor          |
| 0,064 | 0,055 | Aspartate 1-decarboxylase inhibitor                            |
| 0,021 | 0,012 | CYP17A substrate                                               |
| 0,049 | 0,039 | Tubulin GTPase inhibitor                                       |
| 0,078 | 0,069 | D-malate dehydrogenase (decarboxylating) inhibitor             |
| 0,095 | 0,086 | Photinus-luciferin 4-monooxygenase (ATP-hydrolysing) inhibitor |
| 0,016 | 0,007 | Kanamycin kinase inhibitor                                     |
| 0,020 | 0,012 | Antibiotic Macrolide-like                                      |
| 0,220 | 0,211 | CDP-diacylglycerol-serine O-phosphatidyltransferase inhibitor  |
| 0,123 | 0,115 | Antidiabetic (type 1)                                          |
| 0,093 | 0,085 | Pyrimidine-deoxynucleoside 2'-dioxygenase inhibitor            |
| 0,081 | 0,073 | Astringent                                                     |
| 0,052 | 0,043 | Sucrose alpha-glucosidase inhibitor                            |
| 0,049 | 0,041 | D-lactate-2-sulfatase inhibitor                                |
| 0,134 | 0,126 | Malate dehydrogenase inhibitor                                 |
| 0,079 | 0,071 | Nucleotide diphosphatase inhibitor                             |
| 0,083 | 0,075 | Aspartate transaminase inhibitor                               |
| 0,104 | 0,096 | Thiol S-methyltransferase inhibitor                            |
| 0,021 | 0,013 | CYP27 substrate                                                |
| 0,106 | 0,098 | Selenocysteine lyase inhibitor                                 |
| 0,047 | 0,039 | AMP nucleosidase inhibitor                                     |
| 0,074 | 0,066 | 3-Isopropylmalate dehydrogenase inhibitor                      |
| 0,022 | 0,014 | NMDA receptor phencyclidine site antagonist                    |
| 0,029 | 0,021 | Melatonin 2 agonist                                            |

|       |       |                                                            |
|-------|-------|------------------------------------------------------------|
| 0,069 | 0,061 | Aspartate carbamoyltransferase inhibitor                   |
| 0,074 | 0,066 | Ribulose-bisphosphate carboxylase inhibitor                |
| 0,074 | 0,066 | Succinate-hydroxymethylglutarate CoA-transferase inhibitor |
| 0,010 | 0,002 | Antibiotic Tribactam-like                                  |
| 0,020 | 0,013 | Progesterone receptor B1 antagonist                        |
| 0,032 | 0,025 | Steroid-like                                               |
| 0,056 | 0,049 | Beta-fructofuranosidase inhibitor                          |
| 0,124 | 0,117 | Alkylglycerone-phosphate synthase inhibitor                |
| 0,093 | 0,086 | L-lysine 6-transaminase inhibitor                          |
| 0,115 | 0,108 | Dolichyl-phosphate beta-D-mannosyltransferase inhibitor    |
| 0,067 | 0,061 | Carbamoyl-phosphate synthase (ammonia) inhibitor           |
| 0,016 | 0,009 | Antiinflammatory steroid                                   |
| 0,125 | 0,119 | Dependence treatment                                       |
| 0,073 | 0,066 | Cysteine transaminase inhibitor                            |
| 0,092 | 0,086 | Nav1.1 sodium channel blocker                              |
| 0,106 | 0,100 | Allophanate hydrolase inhibitor                            |
| 0,042 | 0,036 | Glucose-1-phosphate adenylyltransferase inhibitor          |
| 0,120 | 0,114 | Tetrahydroxynaphthalene reductase inhibitor                |
| 0,079 | 0,073 | Hydroxymethylglutaryl-CoA reductase inhibitor              |
| 0,054 | 0,049 | Androgen antagonist                                        |
| 0,042 | 0,037 | Arginine-tRNA ligase inhibitor                             |
| 0,059 | 0,053 | Hot flush treatment                                        |
| 0,039 | 0,033 | Glucose-1-phosphatase inhibitor                            |
| 0,034 | 0,028 | Ribose-5-phosphate adenylyltransferase inhibitor           |
| 0,046 | 0,040 | Nucleoside deoxyribosyltransferase inhibitor               |
| 0,017 | 0,012 | CYP11B1 substrate                                          |
| 0,140 | 0,135 | Serine-pyruvate transaminase inhibitor                     |
| 0,193 | 0,188 | CYP1A2 inhibitor                                           |
| 0,089 | 0,084 | Nicotinic alpha3beta4 receptor agonist                     |
| 0,071 | 0,066 | Phosphoenolpyruvate carboxykinase (diphosphate) inhibitor  |
| 0,055 | 0,050 | Phosphodiesterase IV inhibitor                             |
| 0,139 | 0,135 | 5 Hydroxytryptamine 7 agonist                              |
| 0,041 | 0,036 | Fructose 5-dehydrogenase (NADP+) inhibitor                 |
| 0,043 | 0,038 | Polyphosphate kinase inhibitor                             |
| 0,049 | 0,045 | Uracil phosphoribosyltransferase inhibitor                 |
| 0,077 | 0,073 | PRL phosphatase inhibitor                                  |
| 0,104 | 0,100 | Beta-alanine-pyruvate transaminase inhibitor               |

|       |       |                                                                  |
|-------|-------|------------------------------------------------------------------|
| 0,104 | 0,100 | Galactose 1-dehydrogenase (NADP+) inhibitor                      |
| 0,041 | 0,037 | Neuraminidase inhibitor                                          |
| 0,041 | 0,038 | Chorismate mutase inhibitor                                      |
| 0,029 | 0,025 | Transaldolase inhibitor                                          |
| 0,085 | 0,081 | SULT1A1 substrate                                                |
| 0,061 | 0,057 | 4-Hydroxy-4-methyl-2-oxoglutarate aldolase inhibitor             |
| 0,029 | 0,026 | Homoisocitrate dehydrogenase inhibitor                           |
| 0,073 | 0,070 | [acyl-carrier-protein] S-malonyltransferase inhibitor            |
| 0,073 | 0,070 | L-lysine oxidase inhibitor                                       |
| 0,079 | 0,075 | Lysine decarboxylase inhibitor                                   |
| 0,167 | 0,164 | DNA-3-methyladenine glycosylase I inhibitor                      |
| 0,062 | 0,059 | Deoxyhypusine synthase inhibitor                                 |
| 0,169 | 0,167 | Cis-1,2-dihydro-1,2-dihydroxynaphthalene dehydrogenase inhibitor |
| 0,196 | 0,194 | FMO3 substrate                                                   |
| 0,051 | 0,048 | Acidifying agent gastric                                         |
| 0,087 | 0,084 | Pantothenase inhibitor                                           |
| 0,094 | 0,091 | Dethiobiotin synthase inhibitor                                  |
| 0,061 | 0,059 | Purine biosynthesis inhibitor                                    |
| 0,108 | 0,106 | VEGF expression inhibitor                                        |
| 0,009 | 0,007 | Vanilloid 3 antagonist                                           |
| 0,112 | 0,110 | Peptidylamidoglycolate lyase inhibitor                           |
| 0,065 | 0,063 | Glycerophosphocholine phosphodiesterase inhibitor                |
| 0,102 | 0,101 | Prepilin peptidase inhibitor                                     |
| 0,102 | 0,101 | Haloacetate dehalogenase inhibitor                               |
| 0,056 | 0,054 | Prokinetic                                                       |
| 0,059 | 0,057 | Isocitrate dehydrogenase (NADP+) inhibitor                       |
| 0,044 | 0,043 | Glutamate uptake inhibitor                                       |
| 0,019 | 0,019 | Cortisone alpha-reductase inhibitor                              |
| 0,136 | 0,135 | Aldehyde dehydrogenase 2 substrate                               |
| 0,058 | 0,058 | NMN nucleosidase inhibitor                                       |
| 0,018 | 0,017 | 2-Hydroxyacylsphingosine 1-beta-galactosyltransferase inhibitor  |
| 0,126 | 0,126 | N-acetyl-gamma-glutamyl-phosphate reductase inhibitor            |

**Table S15.** Drug-induced gene expression profiles prediction (DIGEP-Pred). mRNA based, protein based, MCF-7 based, VCaP 6h based, VCaP 24h based, and combination prediction results for complexes 1–5. The name of each gene can be correlated with diseases, side-effects and biological pathways in Comparative Toxicogenomics Database (CTD), Mount Desert Island Biological Laboratory, Salisbury Cove, Maine (<http://ctdbase.org/>).

## Complex 1

### mRNA based prediction result

| Pa    | Pi    | DownRegulation  | Pa    | Pi    | UpRegulation    |
|-------|-------|-----------------|-------|-------|-----------------|
| 0.623 | 0.034 | <u>TAGLN</u>    | 0.764 | 0.025 | <u>TNNT1</u>    |
| 0.631 | 0.076 | <u>NSF</u>      | 0.708 | 0.072 | <u>SQLE</u>     |
| 0.670 | 0.118 | <u>TMEM194A</u> | 0.648 | 0.034 | <u>WIP1</u>     |
| 0.602 | 0.103 | <u>TRAF5</u>    | 0.634 | 0.036 | <u>ASAH1</u>    |
| 0.599 | 0.118 | <u>ADORA2B</u>  | 0.600 | 0.024 | <u>GDPD3</u>    |
| 0.599 | 0.118 | <u>CDCA4</u>    | 0.635 | 0.065 | <u>MT1B</u>     |
| 0.599 | 0.118 | <u>CENPJ</u>    | 0.653 | 0.088 | <u>SFRP1</u>    |
| 0.599 | 0.118 | <u>DNAJC9</u>   | 0.574 | 0.040 | <u>INHBE</u>    |
| 0.599 | 0.118 | <u>DONSON</u>   | 0.610 | 0.105 | <u>CACNG4</u>   |
| 0.599 | 0.118 | <u>HAUS8</u>    | 0.610 | 0.105 | <u>CHRNE</u>    |
| 0.599 | 0.118 | <u>MCMBP</u>    | 0.599 | 0.118 | <u>PFKFB2</u>   |
| 0.599 | 0.118 | <u>NUP155</u>   | 0.599 | 0.118 | <u>SH3BGRL</u>  |
| 0.599 | 0.118 | <u>PARP2</u>    | 0.599 | 0.118 | <u>TRIM13</u>   |
| 0.599 | 0.118 | <u>RMI1</u>     | 0.508 | 0.028 | <u>LSS</u>      |
| 0.599 | 0.118 | <u>SCARA3</u>   | 0.527 | 0.049 | <u>FABP1</u>    |
| 0.599 | 0.118 | <u>SLC16A14</u> | 0.510 | 0.033 | <u>PHYH</u>     |
| 0.599 | 0.118 | <u>SUV39H2</u>  | 0.523 | 0.050 | <u>FNDCA</u>    |
| 0.518 | 0.075 | <u>SRPK2</u>    | 0.551 | 0.080 | <u>CNTN1</u>    |
| 0.592 | 0.150 | <u>TPM1</u>     | 0.524 | 0.055 | <u>HPN</u>      |
| 0.578 | 0.137 | <u>GSS</u>      | 0.540 | 0.084 | <u>SERPINA3</u> |
| 0.520 | 0.104 | <u>CYP11A1</u>  | 0.547 | 0.130 | <u>CASP2</u>    |
| 0.524 | 0.168 | <u>TMSB15A</u>  | 0.551 | 0.141 | <u>GAS6</u>     |
|       |       |                 | 0.526 | 0.125 | <u>FAM49A</u>   |
|       |       |                 | 0.513 | 0.133 | <u>PLXNA2</u>   |

### Protein based prediction result

| Pa    | Pi    | DownRegulation | Pa    | Pi    | UpRegulation |
|-------|-------|----------------|-------|-------|--------------|
| 0.737 | 0.075 | <u>CHEK1</u>   | 0.626 | 0.077 | <u>NPPB</u>  |
| 0.564 | 0.124 | <u>CAT</u>     | 0.583 | 0.104 | <u>CD83</u>  |

### MCF7 based prediction result

| Pa    | Pi    | DownRegulation | Pa    | Pi    | UpRegulation  |
|-------|-------|----------------|-------|-------|---------------|
| 0.579 | 0.065 | <u>C3orf52</u> | 0.596 | 0.087 | <u>CDKN1B</u> |
| 0.647 | 0.138 | <u>UBE2C</u>   | 0.589 | 0.083 | <u>ZNF672</u> |

|       |       |               |       |       |                 |
|-------|-------|---------------|-------|-------|-----------------|
| 0.505 | 0.095 | <u>MRPL34</u> | 0.552 | 0.092 | <u>C11orf68</u> |
|       |       |               | 0.548 | 0.122 | <u>KIAA0232</u> |
|       |       |               | 0.542 | 0.116 | <u>RANGAP1</u>  |
|       |       |               | 0.536 | 0.111 | <u>STRN</u>     |
|       |       |               | 0.511 | 0.095 | <u>SCAND2P</u>  |
|       |       |               | 0.546 | 0.143 | <u>CLCF1</u>    |
|       |       |               | 0.506 | 0.113 | <u>CSRP2</u>    |
|       |       |               | 0.507 | 0.142 | <u>FOXC1</u>    |
|       |       |               | 0.508 | 0.154 | <u>WISP2</u>    |
|       |       |               | 0.547 | 0.206 | <u>CLDN9</u>    |
|       |       |               | 0.505 | 0.198 | <u>BIN1</u>     |

### VCAP\_6h based prediction result

| Pa    | Pi    | DownRegulation  | Pa    | Pi    | UpRegulation      |
|-------|-------|-----------------|-------|-------|-------------------|
| 0.961 | 0.005 | <u>WDR11</u>    | 0.972 | 0.004 | <u>B4GALT3</u>    |
| 0.958 | 0.005 | <u>SLC4A1AP</u> | 0.968 | 0.005 | <u>MRPS34</u>     |
| 0.940 | 0.019 | <u>MT1F</u>     | 0.952 | 0.005 | <u>TTC13</u>      |
| 0.939 | 0.018 | <u>MT1H</u>     | 0.952 | 0.010 | <u>SARS2</u>      |
| 0.933 | 0.020 | <u>EAPP</u>     | 0.946 | 0.007 | <u>PMF1</u>       |
| 0.888 | 0.020 | <u>SYNE2</u>    | 0.933 | 0.008 | <u>TUBA4A</u>     |
| 0.893 | 0.026 | <u>MT1P2</u>    | 0.919 | 0.013 | <u>SUGP2</u>      |
| 0.826 | 0.060 | <u>MT1X</u>     | 0.908 | 0.017 | <u>DHPS</u>       |
| 0.739 | 0.068 | <u>RAB1F</u>    | 0.896 | 0.013 | <u>ABCB8</u>      |
| 0.716 | 0.054 | <u>EBAG9</u>    | 0.667 | 0.092 | <u>DCTD</u>       |
| 0.678 | 0.074 | <u>MTHFD2</u>   | 0.607 | 0.097 | <u>DHX32</u>      |
| 0.670 | 0.066 | <u>SLC25A44</u> | 0.547 | 0.097 | <u>POLE2</u>      |
| 0.675 | 0.079 | <u>ZNF221</u>   | 0.515 | 0.068 | <u>CASC3</u>      |
| 0.644 | 0.086 | <u>PEG3</u>     | 0.528 | 0.099 | <u>RRNAD1</u>     |
| 0.630 | 0.081 | <u>ADH5</u>     | 0.539 | 0.120 | <u>ST6GALNAC4</u> |
| 0.595 | 0.079 | <u>KIAA0485</u> | 0.580 | 0.162 | <u>ALG5</u>       |
| 0.607 | 0.112 | <u>YWHAZ</u>    | 0.519 | 0.114 | <u>EHMT2</u>      |
| 0.642 | 0.149 | <u>C10ORF68</u> | 0.514 | 0.160 | <u>MIF</u>        |
| 0.529 | 0.141 | <u>ROBO4</u>    | 0.527 | 0.202 | <u>KIAA1324</u>   |
| 0.539 | 0.178 | <u>CXORF56</u>  |       |       |                   |
| 0.531 | 0.173 | <u>CETP</u>     |       |       |                   |
| 0.511 | 0.208 | <u>MAGEA11</u>  |       |       |                   |

### VCAP\_24h based prediction result

| Pa    | Pi    | DownRegulation | Pa    | Pi    | UpRegulation      |
|-------|-------|----------------|-------|-------|-------------------|
| 0.981 | 0.004 | <u>CBX1</u>    | 0.985 | 0.005 | <u>POU2F1</u>     |
| 0.978 | 0.005 | <u>SEC61G</u>  | 0.984 | 0.005 | <u>ABHD8</u>      |
| 0.977 | 0.005 | <u>RNASET2</u> | 0.982 | 0.005 | <u>GADD45GIP1</u> |
| 0.977 | 0.005 | <u>TALDO1</u>  | 0.981 | 0.005 | <u>PLAC1</u>      |
| 0.977 | 0.004 | <u>IFIT3</u>   | 0.981 | 0.005 | <u>AMPD1</u>      |
| 0.977 | 0.004 | <u>RGS4</u>    | 0.981 | 0.005 | <u>SPEF1</u>      |

|       |       |                 |       |       |                 |
|-------|-------|-----------------|-------|-------|-----------------|
| 0.976 | 0.004 | <u>UBE2E3</u>   | 0.980 | 0.005 | <u>NUDT18</u>   |
| 0.976 | 0.005 | <u>DAP3</u>     | 0.980 | 0.005 | <u>ODZ3</u>     |
| 0.976 | 0.005 | <u>GPBP1L1</u>  | 0.980 | 0.005 | <u>B3GAT1</u>   |
| 0.976 | 0.005 | <u>ATP6V1A</u>  | 0.980 | 0.005 | <u>WRAP53</u>   |
| 0.975 | 0.004 | <u>DMXL2</u>    | 0.979 | 0.005 | <u>CD27</u>     |
| 0.975 | 0.004 | <u>RALGAPB</u>  | 0.979 | 0.005 | <u>IRGQ</u>     |
| 0.975 | 0.004 | <u>C1ORF115</u> | 0.979 | 0.005 | <u>CCR9</u>     |
| 0.974 | 0.004 | <u>DNAJC13</u>  | 0.979 | 0.005 | <u>THSD7A</u>   |
| 0.972 | 0.004 | <u>EPPK1</u>    | 0.978 | 0.005 | <u>AK1</u>      |
| 0.976 | 0.008 | <u>ZNF24</u>    | 0.980 | 0.007 | <u>S100G</u>    |
| 0.973 | 0.005 | <u>NEK4</u>     | 0.978 | 0.005 | <u>UCN</u>      |
| 0.972 | 0.004 | <u>DCUN1D1</u>  | 0.979 | 0.006 | <u>GDF9</u>     |
| 0.972 | 0.005 | <u>DLG5</u>     | 0.979 | 0.006 | <u>GNRH2</u>    |
| 0.972 | 0.005 | <u>HBS1L</u>    | 0.976 | 0.005 | <u>COL9A1</u>   |
| 0.971 | 0.005 | <u>BCL2L1</u>   | 0.976 | 0.004 | <u>BCAM</u>     |
| 0.971 | 0.004 | <u>DCTN4</u>    | 0.976 | 0.005 | <u>ACTA1</u>    |
| 0.971 | 0.005 | <u>RAB5B</u>    | 0.977 | 0.005 | <u>WWC3</u>     |
| 0.971 | 0.005 | <u>TRAFD1</u>   | 0.975 | 0.004 | <u>HGSNAT</u>   |
| 0.972 | 0.006 | <u>MRPL18</u>   | 0.976 | 0.005 | <u>ATP5L</u>    |
| 0.970 | 0.004 | <u>CLIP1</u>    | 0.976 | 0.005 | <u>FAM86A</u>   |
| 0.971 | 0.005 | <u>CLCN3</u>    | 0.976 | 0.005 | <u>LDHC</u>     |
| 0.970 | 0.005 | <u>TSPYL1</u>   | 0.979 | 0.008 | <u>KRT85</u>    |
| 0.970 | 0.005 | <u>FTO</u>      | 0.976 | 0.005 | <u>USP19</u>    |
| 0.968 | 0.005 | <u>NRBF2</u>    | 0.975 | 0.005 | <u>PDE8B</u>    |
| 0.968 | 0.005 | <u>SERINC1</u>  | 0.975 | 0.005 | <u>CLTCL1</u>   |
| 0.966 | 0.004 | <u>CLMN</u>     | 0.975 | 0.004 | <u>TNNT1</u>    |
| 0.965 | 0.004 | <u>IFT52</u>    | 0.975 | 0.005 | <u>MYLPF</u>    |
| 0.966 | 0.005 | <u>POGZ</u>     | 0.975 | 0.005 | <u>CSNK1G2</u>  |
| 0.966 | 0.005 | <u>ZNF148</u>   | 0.974 | 0.005 | <u>CHST7</u>    |
| 0.965 | 0.004 | <u>NACC2</u>    | 0.976 | 0.006 | <u>MPZ</u>      |
| 0.965 | 0.005 | <u>DBN1</u>     | 0.975 | 0.006 | <u>ADAMTS12</u> |
| 0.964 | 0.004 | <u>CALML4</u>   | 0.978 | 0.008 | <u>IFT74</u>    |
| 0.963 | 0.004 | <u>RNF11</u>    | 0.974 | 0.005 | <u>MEGF6</u>    |
| 0.962 | 0.005 | <u>PTGES3</u>   | 0.974 | 0.004 | <u>ITGB1BP3</u> |
| 0.962 | 0.005 | <u>RRAS2</u>    | 0.974 | 0.005 | <u>PARD6A</u>   |
| 0.962 | 0.005 | <u>HMP19</u>    | 0.974 | 0.005 | <u>ARHGAP22</u> |
| 0.961 | 0.005 | <u>TBL1XR1</u>  | 0.973 | 0.005 | <u>TMEM186</u>  |
| 0.966 | 0.009 | <u>PPP1R12A</u> | 0.975 | 0.007 | <u>FAM155A</u>  |
| 0.962 | 0.007 | <u>ARPC3</u>    | 0.974 | 0.005 | <u>PPFIA2</u>   |
| 0.960 | 0.005 | <u>TRAPPC10</u> | 0.975 | 0.007 | <u>CLDN17</u>   |
| 0.957 | 0.004 | <u>EBLN2</u>    | 0.972 | 0.004 | <u>COPS7B</u>   |
| 0.960 | 0.007 | <u>SF3A1</u>    | 0.972 | 0.005 | <u>GPR35</u>    |
| 0.956 | 0.005 | <u>ASAP1</u>    | 0.972 | 0.005 | <u>HMGB3P1</u>  |
| 0.957 | 0.006 | <u>FAM13B</u>   | 0.976 | 0.009 | <u>CENPO</u>    |
| 0.954 | 0.005 | <u>NPTN</u>     | 0.972 | 0.005 | <u>AURKB</u>    |
| 0.954 | 0.005 | <u>COPS7A</u>   | 0.974 | 0.007 | <u>LECT2</u>    |
| 0.953 | 0.004 | <u>CORO1C</u>   | 0.972 | 0.005 | <u>CTNNBIP1</u> |

|       |       |                 |       |       |                     |
|-------|-------|-----------------|-------|-------|---------------------|
| 0.946 | 0.004 | <u>FGF13</u>    | 0.972 | 0.005 | <u>TTN</u>          |
| 0.948 | 0.007 | <u>KCNJ15</u>   | 0.974 | 0.007 | <u>CAMKMT</u>       |
| 0.949 | 0.010 | <u>OGFR</u>     | 0.972 | 0.005 | <u>PTPRCAP</u>      |
| 0.942 | 0.007 | <u>RAF1</u>     | 0.973 | 0.007 | <u>OR6A2</u>        |
| 0.944 | 0.009 | <u>PRPSAP1</u>  | 0.971 | 0.005 | <u>ZBTB48</u>       |
| 0.942 | 0.008 | <u>TRAF4</u>    | 0.973 | 0.007 | <u>CELA3B</u>       |
| 0.945 | 0.011 | <u>NAAA</u>     | 0.970 | 0.004 | <u>FSTL3</u>        |
| 0.949 | 0.016 | <u>RWDD1</u>    | 0.971 | 0.005 | <u>DEFA6</u>        |
| 0.937 | 0.005 | <u>UTP14C</u>   | 0.970 | 0.004 | <u>PNMT</u>         |
| 0.941 | 0.009 | <u>PCNP</u>     | 0.971 | 0.005 | <u>TFAP4</u>        |
| 0.943 | 0.012 | <u>LSM3</u>     | 0.970 | 0.005 | <u>VWA1</u>         |
| 0.941 | 0.010 | <u>NDFIP1</u>   | 0.974 | 0.008 | <u>C21ORF96</u>     |
| 0.939 | 0.008 | <u>CNOT6</u>    | 0.970 | 0.005 | <u>INSL6</u>        |
| 0.947 | 0.018 | <u>CEP170</u>   | 0.970 | 0.005 | <u>OXCT2</u>        |
| 0.950 | 0.021 | <u>SS18L1</u>   | 0.970 | 0.005 | <u>CPA2</u>         |
| 0.935 | 0.007 | <u>WSB2</u>     | 0.972 | 0.007 | <u>MYH3</u>         |
| 0.932 | 0.005 | <u>SAR1B</u>    | 0.970 | 0.005 | <u>FAM110B</u>      |
| 0.930 | 0.005 | <u>FLNA</u>     | 0.972 | 0.007 | <u>CAPN11</u>       |
| 0.932 | 0.008 | <u>STX3</u>     | 0.970 | 0.005 | <u>KIAA1644</u>     |
| 0.927 | 0.004 | <u>AKR1B10</u>  | 0.972 | 0.007 | <u>CLIP3</u>        |
| 0.932 | 0.010 | <u>TMX2</u>     | 0.969 | 0.004 | <u>CHST10</u>       |
| 0.928 | 0.009 | <u>USP15</u>    | 0.968 | 0.005 | <u>CLDN5</u>        |
| 0.930 | 0.010 | <u>RBM23</u>    | 0.968 | 0.005 | <u>ENDOU</u>        |
| 0.924 | 0.005 | <u>HELZ</u>     | 0.968 | 0.005 | <u>CBR4</u>         |
| 0.924 | 0.005 | <u>BMI1</u>     | 0.968 | 0.005 | <u>FARP2</u>        |
| 0.929 | 0.010 | <u>TOM1L1</u>   | 0.968 | 0.005 | <u>PROC</u>         |
| 0.931 | 0.013 | <u>RALBP1</u>   | 0.968 | 0.005 | <u>GRAP</u>         |
| 0.926 | 0.010 | <u>EIF2B1</u>   | 0.968 | 0.005 | <u>STIM1</u>        |
| 0.922 | 0.008 | <u>MTMR4</u>    | 0.968 | 0.005 | <u>CST5</u>         |
| 0.929 | 0.016 | <u>C6ORF62</u>  | 0.967 | 0.005 | <u>CYP4B1</u>       |
| 0.919 | 0.005 | <u>ID2</u>      | 0.967 | 0.005 | <u>ZSCAN16</u>      |
| 0.920 | 0.012 | <u>NIPA2</u>    | 0.969 | 0.007 | <u>RASL11B</u>      |
| 0.913 | 0.006 | <u>FXRD3</u>    | 0.967 | 0.005 | <u>CD300C</u>       |
| 0.921 | 0.015 | <u>CNBP</u>     | 0.966 | 0.005 | <u>CHRM4</u>        |
| 0.910 | 0.006 | <u>SH3BGR13</u> | 0.968 | 0.007 | <u>PGAM2</u>        |
| 0.916 | 0.013 | <u>SYNE2</u>    | 0.968 | 0.007 | <u>LOC100506469</u> |
| 0.911 | 0.017 | <u>SEC23IP</u>  | 0.966 | 0.005 | <u>NKG7</u>         |
| 0.908 | 0.013 | <u>RNF187</u>   | 0.970 | 0.009 | <u>GIF</u>          |
| 0.901 | 0.007 | <u>PUM2</u>     | 0.966 | 0.006 | <u>LSM4</u>         |
| 0.896 | 0.006 | <u>SLC35A5</u>  | 0.969 | 0.009 | <u>UBOX5</u>        |
| 0.900 | 0.010 | <u>MDH1</u>     | 0.964 | 0.004 | <u>CACNA2D2</u>     |
| 0.908 | 0.022 | <u>HSP90B1</u>  | 0.964 | 0.005 | <u>PMCHL1</u>       |
| 0.897 | 0.011 | <u>ELOVL2</u>   | 0.964 | 0.005 | <u>KLHL25</u>       |
| 0.894 | 0.014 | <u>CSNK1A1</u>  | 0.964 | 0.005 | <u>MUC2</u>         |
| 0.895 | 0.016 | <u>ZYX</u>      | 0.966 | 0.007 | <u>CCL5</u>         |
| 0.897 | 0.019 | <u>RNF114</u>   | 0.966 | 0.007 | <u>ARHGEF16</u>     |
| 0.892 | 0.016 | <u>HDGF</u>     | 0.966 | 0.007 | <u>CDH19</u>        |

|       |       |                   |       |       |                     |
|-------|-------|-------------------|-------|-------|---------------------|
| 0.889 | 0.013 | <u>MLH1</u>       | 0.962 | 0.003 | <u>XAB2</u>         |
| 0.891 | 0.018 | <u>TRAK1</u>      | 0.963 | 0.005 | <u>ZBED5</u>        |
| 0.891 | 0.024 | <u>PTPLB</u>      | 0.965 | 0.007 | <u>RNF32</u>        |
| 0.873 | 0.006 | <u>NUP43</u>      | 0.963 | 0.005 | <u>ERCC2</u>        |
| 0.882 | 0.020 | <u>DDX1</u>       | 0.963 | 0.005 | <u>LRMP</u>         |
| 0.885 | 0.023 | <u>COX6A1</u>     | 0.962 | 0.005 | <u>RANBP17</u>      |
| 0.886 | 0.025 | <u>MSL1</u>       | 0.962 | 0.005 | <u>NACAD</u>        |
| 0.877 | 0.018 | <u>IRS2</u>       | 0.964 | 0.006 | <u>ALPP</u>         |
| 0.883 | 0.029 | <u>UGCG</u>       | 0.967 | 0.009 | <u>TUBAL3</u>       |
| 0.858 | 0.005 | <u>KIAA0664L3</u> | 0.962 | 0.005 | <u>ETHE1</u>        |
| 0.888 | 0.035 | <u>CTTN</u>       | 0.964 | 0.007 | <u>PSORS1C2</u>     |
| 0.877 | 0.025 | <u>PNPO</u>       | 0.962 | 0.005 | <u>NRSN2</u>        |
| 0.853 | 0.008 | <u>SNUPN</u>      | 0.966 | 0.009 | <u>IFT140</u>       |
| 0.863 | 0.026 | <u>PGS1</u>       | 0.968 | 0.011 | <u>HSD3B2</u>       |
| 0.873 | 0.037 | <u>PSMG2</u>      | 0.967 | 0.010 | <u>NGB</u>          |
| 0.863 | 0.031 | <u>SNX11</u>      | 0.961 | 0.004 | <u>CHAC1</u>        |
| 0.833 | 0.006 | <u>TOMM22</u>     | 0.965 | 0.009 | <u>AKAP5</u>        |
| 0.856 | 0.030 | <u>FXR1</u>       | 0.970 | 0.014 | <u>GABRB1</u>       |
| 0.854 | 0.029 | <u>TFG</u>        | 0.961 | 0.005 | <u>RCC1</u>         |
| 0.857 | 0.033 | <u>EIF3I</u>      | 0.966 | 0.010 | <u>ZNF816</u>       |
| 0.864 | 0.040 | <u>SLC39A6</u>    | 0.969 | 0.013 | <u>LOC80054</u>     |
| 0.864 | 0.041 | <u>TOMM20</u>     | 0.962 | 0.006 | <u>ADCY8</u>        |
| 0.841 | 0.023 | <u>MED24</u>      | 0.960 | 0.005 | <u>ZNF629</u>       |
| 0.849 | 0.032 | <u>UFD1L</u>      | 0.960 | 0.005 | <u>STAP1</u>        |
| 0.846 | 0.029 | <u>KATNB1</u>     | 0.960 | 0.005 | <u>LOC100507424</u> |
| 0.828 | 0.026 | <u>IFNGR1</u>     | 0.960 | 0.005 | <u>AHDC1</u>        |
| 0.826 | 0.028 | <u>C1ORF216</u>   | 0.959 | 0.004 | <u>SLC37A1</u>      |
| 0.824 | 0.029 | <u>RPL36A</u>     | 0.966 | 0.012 | <u>ALDH1B1</u>      |
| 0.839 | 0.044 | <u>C14ORF109</u>  | 0.963 | 0.010 | <u>GPR153</u>       |
| 0.831 | 0.037 | <u>AASDHPPT</u>   | 0.959 | 0.005 | <u>ARHGEF7</u>      |
| 0.838 | 0.045 | <u>MICALL1</u>    | 0.959 | 0.005 | <u>EDN1</u>         |
| 0.823 | 0.031 | <u>EVL</u>        | 0.964 | 0.010 | <u>CPS1-IT1</u>     |
| 0.820 | 0.029 | <u>ABHD10</u>     | 0.958 | 0.005 | <u>SLC9A3R2</u>     |
| 0.824 | 0.033 | <u>ABHD2</u>      | 0.961 | 0.008 | <u>ASAP3</u>        |
| 0.821 | 0.033 | <u>RPLP1</u>      | 0.958 | 0.005 | <u>SLC26A6</u>      |
| 0.825 | 0.037 | <u>SORBS3</u>     | 0.957 | 0.005 | <u>TPSB2</u>        |
| 0.824 | 0.041 | <u>RNF220</u>     | 0.957 | 0.005 | <u>SRRM1</u>        |
| 0.807 | 0.025 | <u>C20ORF4</u>    | 0.962 | 0.010 | <u>STOML1</u>       |
| 0.817 | 0.036 | <u>ZFAND6</u>     | 0.960 | 0.008 | <u>RGS9</u>         |
| 0.811 | 0.030 | <u>ZNF32</u>      | 0.959 | 0.007 | <u>KDM4D</u>        |
| 0.836 | 0.056 | <u>C8ORF33</u>    | 0.960 | 0.008 | <u>BIN1</u>         |
| 0.805 | 0.032 | <u>RHOT1</u>      | 0.955 | 0.003 | <u>PLEKHJ1</u>      |
| 0.799 | 0.032 | <u>FTL</u>        | 0.957 | 0.005 | <u>EBI3</u>         |
| 0.794 | 0.028 | <u>HDAC3</u>      | 0.956 | 0.005 | <u>DHRS1</u>        |
| 0.815 | 0.053 | <u>SPCS1</u>      | 0.955 | 0.004 | <u>TRAPPC2L</u>     |
| 0.790 | 0.031 | <u>LTBR</u>       | 0.960 | 0.009 | <u>PZP</u>          |
| 0.797 | 0.039 | <u>PTS</u>        | 0.959 | 0.009 | <u>CDH11</u>        |

|       |       |                 |       |       |                  |
|-------|-------|-----------------|-------|-------|------------------|
| 0.799 | 0.043 | <u>PSMA2</u>    | 0.954 | 0.005 | <u>ANKRD49</u>   |
| 0.800 | 0.047 | <u>ZNF500</u>   | 0.957 | 0.008 | <u>DLK1</u>      |
| 0.793 | 0.041 | <u>ATP5B</u>    | 0.962 | 0.012 | <u>ODZ4</u>      |
| 0.779 | 0.036 | <u>IARS</u>     | 0.956 | 0.006 | <u>EPN3</u>      |
| 0.774 | 0.040 | <u>UBR7</u>     | 0.958 | 0.009 | <u>MYOM1</u>     |
| 0.766 | 0.034 | <u>POMGNT1</u>  | 0.958 | 0.009 | <u>DEFA5</u>     |
| 0.773 | 0.041 | <u>RPL23A</u>   | 0.958 | 0.010 | <u>FABP2</u>     |
| 0.765 | 0.038 | <u>RPL19</u>    | 0.952 | 0.004 | <u>ZNF606</u>    |
| 0.764 | 0.037 | <u>RTF1</u>     | 0.954 | 0.006 | <u>CCNJL</u>     |
| 0.771 | 0.046 | <u>ARL6IP4</u>  | 0.958 | 0.010 | <u>FBXL2</u>     |
| 0.775 | 0.053 | <u>WIPF2</u>    | 0.953 | 0.004 | <u>TAF15</u>     |
| 0.768 | 0.048 | <u>NAPA</u>     | 0.957 | 0.008 | <u>TNMD</u>      |
| 0.742 | 0.028 | <u>POLD2</u>    | 0.961 | 0.012 | <u>LCK</u>       |
| 0.759 | 0.052 | <u>KDM2A</u>    | 0.954 | 0.007 | <u>MATN4</u>     |
| 0.744 | 0.040 | <u>VBP1</u>     | 0.952 | 0.005 | <u>SMPDL3B</u>   |
| 0.756 | 0.055 | <u>HRAS</u>     | 0.955 | 0.009 | <u>ZNF93</u>     |
| 0.737 | 0.046 | <u>PEX11A</u>   | 0.951 | 0.005 | <u>CLPS</u>      |
| 0.742 | 0.051 | <u>UBA2</u>     | 0.958 | 0.012 | <u>RAG1</u>      |
| 0.745 | 0.054 | <u>ARL1</u>     | 0.954 | 0.009 | <u>FLJ11710</u>  |
| 0.743 | 0.056 | <u>VEZF1</u>    | 0.956 | 0.010 | <u>NPFFR1</u>    |
| 0.738 | 0.054 | <u>RPS4X</u>    | 0.951 | 0.005 | <u>HIST1H3F</u>  |
| 0.717 | 0.054 | <u>SPAST</u>    | 0.950 | 0.005 | <u>C22ORF29</u>  |
| 0.714 | 0.054 | <u>SEH1L</u>    | 0.950 | 0.005 | <u>SLC5A1</u>    |
| 0.719 | 0.069 | <u>DAG1</u>     | 0.954 | 0.010 | <u>CASQ2</u>     |
| 0.723 | 0.078 | <u>TM2D3</u>    | 0.949 | 0.005 | <u>ZBTB22</u>    |
| 0.705 | 0.070 | <u>C19ORF42</u> | 0.955 | 0.011 | <u>PDHA2</u>     |
| 0.695 | 0.067 | <u>DNAJC8</u>   | 0.958 | 0.014 | <u>KIR3DL1</u>   |
| 0.689 | 0.066 | <u>GOSR1</u>    | 0.949 | 0.005 | <u>KIAA0182</u>  |
| 0.694 | 0.079 | <u>ANAPC5</u>   | 0.950 | 0.007 | <u>PDE6B</u>     |
| 0.702 | 0.101 | <u>HSPH1</u>    | 0.949 | 0.006 | <u>HGFAC</u>     |
| 0.666 | 0.068 | <u>UBE2S</u>    | 0.957 | 0.014 | <u>DPPA4</u>     |
| 0.660 | 0.063 | <u>CASC3</u>    | 0.953 | 0.010 | <u>GPR98</u>     |
| 0.667 | 0.078 | <u>RPLP0</u>    | 0.950 | 0.007 | <u>HIST1H1B</u>  |
| 0.652 | 0.065 | <u>PSMD3</u>    | 0.950 | 0.007 | <u>RHBDL1</u>    |
| 0.641 | 0.056 | <u>LRRC59</u>   | 0.948 | 0.005 | <u>HIST1H2AI</u> |
| 0.644 | 0.075 | <u>B3GNT1</u>   | 0.951 | 0.009 | <u>MYL1</u>      |
| 0.625 | 0.061 | <u>UBE2K</u>    | 0.947 | 0.005 | <u>SCD5</u>      |
| 0.661 | 0.098 | <u>C20ORF24</u> | 0.947 | 0.006 | <u>TNNC1</u>     |
| 0.654 | 0.092 | <u>HNRNPA1</u>  | 0.946 | 0.005 | <u>ZNF667</u>    |
| 0.633 | 0.072 | <u>COPB2</u>    | 0.947 | 0.006 | <u>SRD5A3</u>    |
| 0.629 | 0.070 | <u>C12ORF52</u> | 0.960 | 0.020 | <u>OR1F1</u>     |
| 0.650 | 0.093 | <u>PHB</u>      | 0.945 | 0.005 | <u>CPA1</u>      |
| 0.633 | 0.077 | <u>PHGDH</u>    | 0.950 | 0.009 | <u>MEFV</u>      |
| 0.630 | 0.079 | <u>WDR61</u>    | 0.946 | 0.006 | <u>TCF21</u>     |
| 0.627 | 0.091 | <u>EPRS</u>     | 0.947 | 0.007 | <u>MYBPH</u>     |
| 0.578 | 0.056 | <u>RHOA</u>     | 0.950 | 0.010 | <u>LZTR1</u>     |
| 0.627 | 0.120 | <u>STAU1</u>    | 0.953 | 0.013 | <u>CD207</u>     |

|       |       |                 |       |       |                  |
|-------|-------|-----------------|-------|-------|------------------|
| 0.611 | 0.105 | <u>PGRMC1</u>   | 0.946 | 0.007 | <u>L1TD1</u>     |
| 0.610 | 0.104 | <u>CAPNS1</u>   | 0.948 | 0.009 | <u>LY6G6C</u>    |
| 0.598 | 0.098 | <u>RPS10</u>    | 0.943 | 0.005 | <u>CRLF1</u>     |
| 0.601 | 0.101 | <u>KIAA0100</u> | 0.945 | 0.007 | <u>PRLH</u>      |
| 0.605 | 0.107 | <u>RPS2</u>     | 0.945 | 0.007 | <u>S100A6</u>    |
| 0.564 | 0.071 | <u>PXN</u>      | 0.948 | 0.010 | <u>INS</u>       |
| 0.568 | 0.081 | <u>SMARCD2</u>  | 0.942 | 0.005 | <u>MPDZ</u>      |
| 0.614 | 0.128 | <u>PSMA7</u>    | 0.955 | 0.018 | <u>NLRP1</u>     |
| 0.590 | 0.106 | <u>TMEM97</u>   | 0.958 | 0.020 | <u>FBXO40</u>    |
| 0.556 | 0.090 | <u>TSPAN3</u>   | 0.945 | 0.007 | <u>TEKT2</u>     |
| 0.530 | 0.064 | <u>TP53</u>     | 0.949 | 0.012 | <u>MGC3771</u>   |
| 0.577 | 0.113 | <u>TMEM93</u>   | 0.942 | 0.005 | <u>IL37</u>      |
| 0.575 | 0.114 | <u>OXA1L</u>    | 0.946 | 0.009 | <u>NUP54</u>     |
| 0.562 | 0.101 | <u>H2BFS</u>    | 0.950 | 0.013 | <u>ALLC</u>      |
| 0.583 | 0.125 | <u>LUC7L3</u>   | 0.948 | 0.012 | <u>PSKH1</u>     |
| 0.537 | 0.081 | <u>POP4</u>     | 0.945 | 0.009 | <u>TRAF2</u>     |
| 0.569 | 0.122 | <u>RPL13A</u>   | 0.955 | 0.020 | <u>SFRP5</u>     |
| 0.579 | 0.141 | <u>SET</u>      | 0.943 | 0.007 | <u>C20ORF103</u> |
| 0.552 | 0.114 | <u>NFKBIA</u>   | 0.940 | 0.005 | <u>AP4M1</u>     |
| 0.520 | 0.087 | <u>FOXO3</u>    | 0.947 | 0.012 | <u>ZNF167</u>    |
| 0.557 | 0.127 | <u>CSK</u>      | 0.943 | 0.008 | <u>WRN</u>       |
| 0.558 | 0.129 | <u>TMEM147</u>  | 0.939 | 0.005 | <u>HIST1H2AM</u> |
| 0.545 | 0.121 | <u>RGS2</u>     | 0.942 | 0.008 | <u>MPV17</u>     |
| 0.557 | 0.142 | <u>NFE2L1</u>   | 0.946 | 0.012 | <u>DSC1</u>      |
| 0.541 | 0.134 | <u>CLSTN1</u>   | 0.945 | 0.011 | <u>PRKCG</u>     |
| 0.558 | 0.160 | <u>N4BP2L2</u>  | 0.947 | 0.014 | <u>ARSF</u>      |
| 0.540 | 0.148 | <u>CCT6A</u>    | 0.939 | 0.005 | <u>APOF</u>      |
| 0.535 | 0.147 | <u>STK25</u>    | 0.943 | 0.009 | <u>MAN2A1</u>    |
| 0.529 | 0.144 | <u>ZNF146</u>   | 0.945 | 0.011 | <u>GABRA4</u>    |
| 0.510 | 0.126 | <u>COL9A3</u>   | 0.947 | 0.014 | <u>ZNF197</u>    |
|       |       |                 | 0.943 | 0.010 | <u>CLDN15</u>    |
|       |       |                 | 0.945 | 0.013 | <u>HAPLN1</u>    |
|       |       |                 | 0.946 | 0.015 | <u>BAIAP2L2</u>  |
|       |       |                 | 0.941 | 0.010 | <u>HIST1H2AE</u> |
|       |       |                 | 0.945 | 0.014 | <u>SRGAP2</u>    |
|       |       |                 | 0.939 | 0.008 | <u>SOX3</u>      |
|       |       |                 | 0.935 | 0.005 | <u>CRYBA2</u>    |
|       |       |                 | 0.941 | 0.010 | <u>SGSM3</u>     |
|       |       |                 | 0.939 | 0.008 | <u>HOXA7</u>     |
|       |       |                 | 0.935 | 0.005 | <u>HIGD1B</u>    |
|       |       |                 | 0.942 | 0.012 | <u>TIMM44</u>    |
|       |       |                 | 0.941 | 0.011 | <u>NCDN</u>      |
|       |       |                 | 0.935 | 0.005 | <u>NAT6</u>      |
|       |       |                 | 0.945 | 0.015 | <u>GDF2</u>      |
|       |       |                 | 0.947 | 0.017 | <u>CIDEA</u>     |
|       |       |                 | 0.948 | 0.018 | <u>SEMA6B</u>    |
|       |       |                 | 0.947 | 0.018 | <u>TCL1B</u>     |

|  |       |       |                  |
|--|-------|-------|------------------|
|  | 0.943 | 0.014 | <u>REG1B</u>     |
|  | 0.943 | 0.014 | <u>ADAM11</u>    |
|  | 0.940 | 0.011 | <u>ZNF362</u>    |
|  | 0.943 | 0.014 | <u>ADA</u>       |
|  | 0.935 | 0.006 | <u>NGLY1</u>     |
|  | 0.933 | 0.005 | <u>PLEKHA8P1</u> |
|  | 0.937 | 0.009 | <u>PDCD1LG2</u>  |
|  | 0.942 | 0.014 | <u>TNF</u>       |
|  | 0.939 | 0.011 | <u>OR3A3</u>     |
|  | 0.935 | 0.007 | <u>CELA2A</u>    |
|  | 0.943 | 0.015 | <u>LOC202181</u> |
|  | 0.932 | 0.005 | <u>GMFG</u>      |
|  | 0.932 | 0.005 | <u>EPHA4</u>     |
|  | 0.931 | 0.005 | <u>RNF115</u>    |
|  | 0.939 | 0.013 | <u>CHODL</u>     |
|  | 0.940 | 0.014 | <u>KIR3DS1</u>   |
|  | 0.937 | 0.010 | <u>CD93</u>      |
|  | 0.941 | 0.014 | <u>GNG4</u>      |
|  | 0.935 | 0.009 | <u>GNA11</u>     |
|  | 0.940 | 0.014 | <u>KIR2DS3</u>   |
|  | 0.935 | 0.009 | <u>FZD10</u>     |
|  | 0.946 | 0.020 | <u>NRIP2</u>     |
|  | 0.950 | 0.025 | <u>STAB2</u>     |
|  | 0.929 | 0.005 | <u>RAMP2</u>     |
|  | 0.929 | 0.004 | <u>GNA12</u>     |
|  | 0.945 | 0.021 | <u>RENBP</u>     |
|  | 0.949 | 0.025 | <u>IL36RN</u>    |
|  | 0.931 | 0.008 | <u>IGF1R</u>     |
|  | 0.931 | 0.009 | <u>PAEP</u>      |
|  | 0.934 | 0.012 | <u>GPD1</u>      |
|  | 0.930 | 0.008 | <u>HIST1H4E</u>  |
|  | 0.935 | 0.013 | <u>RORC</u>      |
|  | 0.942 | 0.020 | <u>SAFB2</u>     |
|  | 0.931 | 0.009 | <u>GCG</u>       |
|  | 0.932 | 0.010 | <u>APEX2</u>     |
|  | 0.930 | 0.008 | <u>GPR19</u>     |
|  | 0.933 | 0.011 | <u>TASP1</u>     |
|  | 0.926 | 0.005 | <u>AICDA</u>     |
|  | 0.927 | 0.006 | <u>ACE</u>       |
|  | 0.936 | 0.015 | <u>GPR1</u>      |
|  | 0.935 | 0.014 | <u>OTC</u>       |
|  | 0.926 | 0.006 | <u>MMRN2</u>     |
|  | 0.929 | 0.008 | <u>MAP4K2</u>    |
|  | 0.934 | 0.015 | <u>MEP1A</u>     |
|  | 0.930 | 0.011 | <u>ANKRD36</u>   |
|  | 0.937 | 0.018 | <u>HIST1H3J</u>  |
|  | 0.931 | 0.012 | <u>PROX1</u>     |

|  |       |       |                 |
|--|-------|-------|-----------------|
|  | 0.934 | 0.015 | <u>HIST1H1D</u> |
|  | 0.932 | 0.014 | <u>BMP5</u>     |
|  | 0.926 | 0.008 | <u>KCNE1L</u>   |
|  | 0.937 | 0.019 | <u>FSCN3</u>    |
|  | 0.926 | 0.008 | <u>SLMO1</u>    |
|  | 0.924 | 0.007 | <u>PLA2G10</u>  |
|  | 0.931 | 0.014 | C11ORF63        |
|  | 0.922 | 0.005 | <u>GGTLC1</u>   |
|  | 0.930 | 0.014 | C9ORF7          |
|  | 0.924 | 0.008 | ZNF643          |
|  | 0.926 | 0.009 | ZNF324          |
|  | 0.930 | 0.014 | <u>PKP2</u>     |
|  | 0.923 | 0.007 | <u>GMEB1</u>    |
|  | 0.926 | 0.010 | MYBPC2          |
|  | 0.945 | 0.029 | <u>ARHGDIG</u>  |
|  | 0.935 | 0.021 | C22ORF26        |
|  | 0.920 | 0.005 | <u>RPL13P5</u>  |
|  | 0.922 | 0.008 | <u>FBXL8</u>    |
|  | 0.936 | 0.022 | <u>PRL</u>      |
|  | 0.927 | 0.013 | <u>GP9</u>      |
|  | 0.928 | 0.015 | <u>RAB11B</u>   |
|  | 0.923 | 0.010 | <u>USP32</u>    |
|  | 0.926 | 0.014 | <u>PPY</u>      |
|  | 0.928 | 0.016 | <u>ADAMTS13</u> |
|  | 0.920 | 0.007 | <u>CLEC11A</u>  |
|  | 0.932 | 0.019 | <u>INSRR</u>    |
|  | 0.921 | 0.009 | <u>MPO</u>      |
|  | 0.923 | 0.012 | <u>RXRG</u>     |
|  | 0.932 | 0.021 | <u>MYL2</u>     |
|  | 0.922 | 0.011 | <u>SAA3P</u>    |
|  | 0.919 | 0.008 | <u>LGI1</u>     |
|  | 0.917 | 0.006 | <u>GDF3</u>     |
|  | 0.934 | 0.024 | ZNF8            |
|  | 0.917 | 0.008 | JMJD7           |
|  | 0.927 | 0.020 | <u>RNF186</u>   |
|  | 0.928 | 0.020 | <u>KLRG1</u>    |
|  | 0.917 | 0.009 | <u>SLC9A2</u>   |
|  | 0.915 | 0.008 | <u>G6PC</u>     |
|  | 0.917 | 0.010 | <u>SLC10A2</u>  |
|  | 0.925 | 0.018 | FRMPD1          |
|  | 0.916 | 0.009 | <u>MMP28</u>    |
|  | 0.921 | 0.014 | <u>BTC</u>      |
|  | 0.921 | 0.015 | <u>HEG1</u>     |
|  | 0.922 | 0.016 | CXORF27         |
|  | 0.914 | 0.009 | <u>PPP2R5E</u>  |
|  | 0.914 | 0.009 | <u>SCARF1</u>   |
|  | 0.918 | 0.013 | <u>TMPRSS6</u>  |

|  |       |       |                 |
|--|-------|-------|-----------------|
|  | 0.916 | 0.011 | <u>ASTE1</u>    |
|  | 0.924 | 0.020 | <u>IL1A</u>     |
|  | 0.929 | 0.025 | <u>C6ORF15</u>  |
|  | 0.917 | 0.013 | <u>MORN1</u>    |
|  | 0.917 | 0.015 | <u>ALOX5AP</u>  |
|  | 0.918 | 0.015 | <u>LRAT</u>     |
|  | 0.915 | 0.013 | <u>RALA</u>     |
|  | 0.914 | 0.012 | <u>ZNF177</u>   |
|  | 0.906 | 0.005 | <u>HIST1H4C</u> |
|  | 0.919 | 0.018 | <u>SCN1A</u>    |
|  | 0.921 | 0.019 | <u>UBR4</u>     |
|  | 0.916 | 0.014 | <u>VPS33A</u>   |
|  | 0.922 | 0.021 | <u>ESRRA</u>    |
|  | 0.920 | 0.019 | <u>C19ORF73</u> |
|  | 0.920 | 0.019 | <u>TAS2R9</u>   |
|  | 0.907 | 0.007 | <u>XPO4</u>     |
|  | 0.909 | 0.009 | <u>ARPP21</u>   |
|  | 0.913 | 0.014 | <u>CACNA1S</u>  |
|  | 0.917 | 0.019 | <u>RERGL</u>    |
|  | 0.913 | 0.014 | <u>SH3TC2</u>   |
|  | 0.915 | 0.016 | <u>TMEM30B</u>  |
|  | 0.915 | 0.017 | <u>SLC35E2</u>  |
|  | 0.903 | 0.005 | <u>HIST1H3G</u> |
|  | 0.919 | 0.021 | <u>CEBPE</u>    |
|  | 0.915 | 0.017 | <u>CD3G</u>     |
|  | 0.916 | 0.019 | <u>RPS3A</u>    |
|  | 0.909 | 0.012 | <u>MCPH1</u>    |
|  | 0.908 | 0.011 | <u>GDNF</u>     |
|  | 0.907 | 0.010 | <u>LRRK1</u>    |
|  | 0.917 | 0.020 | <u>PTPN7</u>    |
|  | 0.913 | 0.016 | <u>CASZ1</u>    |
|  | 0.918 | 0.022 | <u>ZFR2</u>     |
|  | 0.913 | 0.017 | <u>CYP2A13</u>  |
|  | 0.903 | 0.007 | <u>CNPPD1</u>   |
|  | 0.910 | 0.015 | <u>CAPN9</u>    |
|  | 0.914 | 0.018 | <u>KIR2DL4</u>  |
|  | 0.905 | 0.009 | <u>USP11</u>    |
|  | 0.908 | 0.013 | <u>MAGIX</u>    |
|  | 0.910 | 0.015 | <u>TRIM48</u>   |
|  | 0.920 | 0.025 | <u>OR2F1</u>    |
|  | 0.915 | 0.020 | <u>KIAA1310</u> |
|  | 0.911 | 0.017 | <u>UBTD1</u>    |
|  | 0.910 | 0.016 | <u>GNL3LP1</u>  |
|  | 0.915 | 0.021 | <u>CNNM1</u>    |
|  | 0.924 | 0.030 | <u>NDUFB7</u>   |
|  | 0.909 | 0.016 | <u>GSTCD</u>    |
|  | 0.898 | 0.005 | <u>CCNT1</u>    |

|  |       |       |                 |
|--|-------|-------|-----------------|
|  | 0.914 | 0.021 | <u>TNN</u>      |
|  | 0.905 | 0.013 | <u>CDK20</u>    |
|  | 0.913 | 0.021 | <u>MYH2</u>     |
|  | 0.910 | 0.018 | <u>GPR21</u>    |
|  | 0.907 | 0.015 | <u>CPNE7</u>    |
|  | 0.908 | 0.016 | <u>DMRT1</u>    |
|  | 0.904 | 0.013 | <u>C1ORF114</u> |
|  | 0.904 | 0.013 | <u>ZNF141</u>   |
|  | 0.905 | 0.014 | <u>TBX21</u>    |
|  | 0.899 | 0.008 | <u>KCNK2</u>    |
|  | 0.914 | 0.024 | <u>ACCN1</u>    |
|  | 0.911 | 0.021 | <u>UNC5C</u>    |
|  | 0.901 | 0.012 | <u>FCF1</u>     |
|  | 0.906 | 0.016 | <u>MRPL41</u>   |
|  | 0.902 | 0.013 | <u>CFHR5</u>    |
|  | 0.909 | 0.019 | <u>FLNC</u>     |
|  | 0.908 | 0.019 | <u>BEGAIN</u>   |
|  | 0.905 | 0.017 | <u>MPZL2</u>    |
|  | 0.916 | 0.027 | <u>FGF20</u>    |
|  | 0.912 | 0.024 | <u>TMEM59L</u>  |
|  | 0.906 | 0.019 | <u>ANKRD1</u>   |
|  | 0.899 | 0.012 | <u>COLEC11</u>  |
|  | 0.909 | 0.023 | <u>RGS3</u>     |
|  | 0.895 | 0.009 | <u>KLK14</u>    |
|  | 0.910 | 0.024 | <u>CACNB4</u>   |
|  | 0.899 | 0.014 | <u>KLRC3</u>    |
|  | 0.910 | 0.025 | <u>MZB1</u>     |
|  | 0.902 | 0.017 | <u>ACADS</u>    |
|  | 0.900 | 0.016 | <u>LIN7A</u>    |
|  | 0.909 | 0.026 | <u>KIR2DS2</u>  |
|  | 0.902 | 0.019 | <u>HOXB1</u>    |
|  | 0.904 | 0.021 | <u>ABP1</u>     |
|  | 0.914 | 0.031 | <u>PTPRB</u>    |
|  | 0.905 | 0.023 | <u>SSTR5</u>    |
|  | 0.900 | 0.018 | <u>CELA3A</u>   |
|  | 0.917 | 0.035 | <u>AQP7</u>     |
|  | 0.898 | 0.016 | <u>NCKAP1</u>   |
|  | 0.898 | 0.016 | <u>SLC17A2</u>  |
|  | 0.908 | 0.027 | <u>SLCO3A1</u>  |
|  | 0.913 | 0.031 | <u>PLA2G5</u>   |
|  | 0.906 | 0.025 | <u>OR2S2</u>    |
|  | 0.905 | 0.024 | <u>DNAJC4</u>   |
|  | 0.898 | 0.017 | <u>B3GALT2</u>  |
|  | 0.905 | 0.025 | <u>CCDC64</u>   |
|  | 0.899 | 0.020 | <u>BACH2</u>    |
|  | 0.906 | 0.027 | <u>ANGPTL4</u>  |
|  | 0.886 | 0.007 | <u>SFT2D2</u>   |

|  |       |       |                  |
|--|-------|-------|------------------|
|  | 0.894 | 0.016 | KRT3             |
|  | 0.902 | 0.024 | <u>KLHL4</u>     |
|  | 0.897 | 0.019 | <u>RPL3L</u>     |
|  | 0.894 | 0.016 | <u>CRYBB3</u>    |
|  | 0.896 | 0.018 | <u>TM4SF5</u>    |
|  | 0.900 | 0.023 | <u>TXNRD3</u>    |
|  | 0.895 | 0.018 | <u>PTGER1</u>    |
|  | 0.899 | 0.023 | <u>NPPB</u>      |
|  | 0.896 | 0.021 | LOC400084        |
|  | 0.888 | 0.013 | <u>EBLN2</u>     |
|  | 0.896 | 0.021 | <u>INSR</u>      |
|  | 0.893 | 0.019 | <u>IVD</u>       |
|  | 0.897 | 0.024 | <u>HIST1H2BB</u> |
|  | 0.895 | 0.023 | <u>FLT4</u>      |
|  | 0.894 | 0.021 | <u>COL18A1</u>   |
|  | 0.890 | 0.018 | <u>FKBP6</u>     |
|  | 0.887 | 0.015 | <u>DDX43</u>     |
|  | 0.887 | 0.015 | <u>MRPL20</u>    |
|  | 0.897 | 0.025 | <u>RAPGEF5</u>   |
|  | 0.899 | 0.028 | <u>INHBC</u>     |
|  | 0.903 | 0.032 | C1ORF38          |
|  | 0.890 | 0.019 | <u>LRRN3</u>     |
|  | 0.881 | 0.011 | <u>VIP</u>       |
|  | 0.883 | 0.013 | <u>RGP1</u>      |
|  | 0.895 | 0.026 | <u>HTR1F</u>     |
|  | 0.909 | 0.039 | LOC100288594     |
|  | 0.898 | 0.029 | <u>GPR182</u>    |
|  | 0.892 | 0.023 | GALNT8           |
|  | 0.898 | 0.030 | <u>SIX3</u>      |
|  | 0.898 | 0.029 | <u>ECE2</u>      |
|  | 0.881 | 0.012 | ZNF124           |
|  | 0.894 | 0.026 | ASMTL-AS1        |
|  | 0.884 | 0.016 | <u>OVGP1</u>     |
|  | 0.892 | 0.025 | <u>MSTN</u>      |
|  | 0.893 | 0.026 | <u>SYNGR4</u>    |
|  | 0.897 | 0.030 | <u>TP73-AS1</u>  |
|  | 0.892 | 0.025 | <u>OXT</u>       |
|  | 0.890 | 0.024 | <u>FKSG2</u>     |
|  | 0.895 | 0.029 | FGF14            |
|  | 0.891 | 0.026 | ITFG2            |
|  | 0.886 | 0.020 | <u>SLC12A6</u>   |
|  | 0.889 | 0.024 | <u>USP27X</u>    |
|  | 0.902 | 0.037 | <u>RAB3D</u>     |
|  | 0.889 | 0.024 | <u>RFPL3-AS1</u> |
|  | 0.898 | 0.033 | <u>KIR3DL3</u>   |
|  | 0.895 | 0.030 | <u>PYGM</u>      |
|  | 0.885 | 0.022 | <u>FAM164C</u>   |

|  |       |       |                  |
|--|-------|-------|------------------|
|  | 0.871 | 0.007 | <u>CDHR1</u>     |
|  | 0.881 | 0.018 | <u>ARHGEF10L</u> |
|  | 0.871 | 0.008 | <u>OFD1</u>      |
|  | 0.880 | 0.017 | <u>FAM174B</u>   |
|  | 0.887 | 0.024 | HCG26            |
|  | 0.878 | 0.015 | <u>DFFA</u>      |
|  | 0.888 | 0.026 | TRPV5            |
|  | 0.888 | 0.026 | <u>TRIM14</u>    |
|  | 0.878 | 0.015 | <u>FZD5</u>      |
|  | 0.879 | 0.017 | C4ORF43          |
|  | 0.885 | 0.023 | <u>CWH43</u>     |
|  | 0.886 | 0.025 | <u>RPAIN</u>     |
|  | 0.879 | 0.018 | <u>SEMG2</u>     |
|  | 0.877 | 0.016 | <u>CFB</u>       |
|  | 0.893 | 0.032 | <u>BRD7P3</u>    |
|  | 0.881 | 0.020 | <u>MMP15</u>     |
|  | 0.889 | 0.029 | CRX              |
|  | 0.893 | 0.034 | <u>KIAA1024</u>  |
|  | 0.888 | 0.028 | <u>HIST1H4A</u>  |
|  | 0.874 | 0.014 | <u>FKBP10</u>    |
|  | 0.884 | 0.024 | C19ORF26         |
|  | 0.881 | 0.021 | C8ORF51          |
|  | 0.887 | 0.028 | <u>HIST1H2AK</u> |
|  | 0.885 | 0.025 | <u>NR5A1</u>     |
|  | 0.891 | 0.032 | <u>ESRRB</u>     |
|  | 0.874 | 0.016 | <u>NARS</u>      |
|  | 0.886 | 0.028 | <u>KCNJ1</u>     |
|  | 0.897 | 0.039 | <u>RHOBTB2</u>   |
|  | 0.879 | 0.021 | LOC729799        |
|  | 0.875 | 0.017 | <u>SGCG</u>      |
|  | 0.864 | 0.006 | <u>KIF18A</u>    |
|  | 0.870 | 0.012 | <u>PSD3</u>      |
|  | 0.882 | 0.025 | <u>MYH1</u>      |
|  | 0.891 | 0.034 | <u>PRTN3</u>     |
|  | 0.882 | 0.024 | <u>UHRF1BP1L</u> |
|  | 0.882 | 0.025 | <u>BAIAP3</u>    |
|  | 0.874 | 0.018 | <u>TBC1D8</u>    |
|  | 0.870 | 0.014 | <u>HIST1H3C</u>  |
|  | 0.883 | 0.027 | <u>SLC18A1</u>   |
|  | 0.874 | 0.018 | KIAA1614         |
|  | 0.883 | 0.027 | <u>SP2</u>       |
|  | 0.880 | 0.025 | <u>TRPM8</u>     |
|  | 0.874 | 0.019 | <u>RETN</u>      |
|  | 0.884 | 0.030 | FAM189A1         |
|  | 0.876 | 0.022 | <u>CD7</u>       |
|  | 0.878 | 0.025 | <u>ATP4A</u>     |
|  | 0.877 | 0.024 | <u>ATP2A3</u>    |

|  |       |       |                  |
|--|-------|-------|------------------|
|  | 0.880 | 0.027 | <u>NUBP1</u>     |
|  | 0.885 | 0.032 | <u>CUL2</u>      |
|  | 0.887 | 0.034 | <u>RHBG</u>      |
|  | 0.880 | 0.028 | <u>SLC13A4</u>   |
|  | 0.879 | 0.028 | <u>GFRA4</u>     |
|  | 0.876 | 0.024 | <u>GATA1</u>     |
|  | 0.876 | 0.024 | <u>KERA</u>      |
|  | 0.878 | 0.026 | <u>HOXA4</u>     |
|  | 0.884 | 0.033 | <u>SNRNP70</u>   |
|  | 0.881 | 0.029 | <u>JPH2</u>      |
|  | 0.873 | 0.022 | <u>RUNDC2C</u>   |
|  | 0.875 | 0.025 | <u>LY6G5C</u>    |
|  | 0.876 | 0.026 | <u>L1CAM</u>     |
|  | 0.875 | 0.025 | <u>SULF1</u>     |
|  | 0.870 | 0.020 | <u>DLGAP4</u>    |
|  | 0.870 | 0.020 | <u>CD79A</u>     |
|  | 0.872 | 0.022 | <u>KRAS</u>      |
|  | 0.874 | 0.025 | <u>TNFRSF10C</u> |
|  | 0.874 | 0.025 | <u>OR5I1</u>     |
|  | 0.877 | 0.028 | <u>CACNA1H</u>   |
|  | 0.872 | 0.023 | <u>WFDC1</u>     |
|  | 0.872 | 0.024 | <u>FLJ22184</u>  |
|  | 0.861 | 0.012 | <u>SMC5</u>      |
|  | 0.883 | 0.035 | <u>SCAI</u>      |
|  | 0.874 | 0.027 | <u>DPP4</u>      |
|  | 0.874 | 0.026 | <u>CHRNA2</u>    |
|  | 0.870 | 0.023 | <u>SYNM</u>      |
|  | 0.880 | 0.033 | <u>GALK1</u>     |
|  | 0.874 | 0.027 | <u>TPSAB1</u>    |
|  | 0.865 | 0.018 | <u>PTCD1</u>     |
|  | 0.871 | 0.025 | <u>TSPAN9</u>    |
|  | 0.875 | 0.029 | <u>SPCS3</u>     |
|  | 0.865 | 0.019 | <u>WSCD1</u>     |
|  | 0.874 | 0.028 | <u>RBP3</u>      |
|  | 0.861 | 0.014 | <u>WNT7A</u>     |
|  | 0.882 | 0.036 | <u>LHX3</u>      |
|  | 0.869 | 0.023 | <u>NTRK1</u>     |
|  | 0.880 | 0.034 | <u>PKP1</u>      |
|  | 0.877 | 0.031 | <u>PCDHA9</u>    |
|  | 0.873 | 0.028 | <u>DOK3</u>      |
|  | 0.873 | 0.027 | <u>P2RY6</u>     |
|  | 0.869 | 0.024 | <u>SCN10A</u>    |
|  | 0.868 | 0.023 | <u>MFAP3</u>     |
|  | 0.870 | 0.026 | <u>WDR25</u>     |
|  | 0.867 | 0.023 | <u>CORO1A</u>    |
|  | 0.871 | 0.027 | <u>TPM3</u>      |
|  | 0.880 | 0.037 | <u>KCNMB2</u>    |

|  |       |       |                  |
|--|-------|-------|------------------|
|  | 0.860 | 0.017 | <u>VAX2</u>      |
|  | 0.868 | 0.026 | <u>DBF4B</u>     |
|  | 0.875 | 0.033 | MMP20            |
|  | 0.871 | 0.029 | <u>RAP1A</u>     |
|  | 0.866 | 0.024 | CNTD2            |
|  | 0.870 | 0.029 | <u>HIST1H2AB</u> |
|  | 0.867 | 0.027 | <u>C9ORF156</u>  |
|  | 0.869 | 0.029 | <u>CNGA1</u>     |
|  | 0.861 | 0.021 | <u>NEUROD1</u>   |
|  | 0.870 | 0.030 | AKAP4            |
|  | 0.864 | 0.024 | C2ORF67          |
|  | 0.879 | 0.039 | <u>SNHG3</u>     |
|  | 0.863 | 0.023 | <u>GRIK3</u>     |
|  | 0.863 | 0.023 | <u>FOXJ1</u>     |
|  | 0.862 | 0.023 | <u>SEMA4C</u>    |
|  | 0.853 | 0.014 | <u>SORL1</u>     |
|  | 0.873 | 0.034 | <u>NTN1</u>      |
|  | 0.850 | 0.011 | <u>GADD45G</u>   |
|  | 0.865 | 0.026 | <u>T</u>         |
|  | 0.865 | 0.026 | PCDHA10          |
|  | 0.870 | 0.032 | C6ORF27          |
|  | 0.889 | 0.051 | <u>CRYBB2</u>    |
|  | 0.858 | 0.021 | <u>HYAL3</u>     |
|  | 0.861 | 0.024 | <u>CSRP3</u>     |
|  | 0.865 | 0.029 | <u>CDKAL1</u>    |
|  | 0.862 | 0.026 | <u>FGF16</u>     |
|  | 0.860 | 0.024 | <u>MIA2</u>      |
|  | 0.863 | 0.027 | <u>GCKR</u>      |
|  | 0.880 | 0.045 | <u>DNASE1</u>    |
|  | 0.877 | 0.041 | CA5B             |
|  | 0.860 | 0.025 | <u>PRKY</u>      |
|  | 0.859 | 0.024 | <u>PITPNM3</u>   |
|  | 0.865 | 0.030 | <u>CCDC48</u>    |
|  | 0.859 | 0.024 | <u>PAX1</u>      |
|  | 0.877 | 0.043 | <u>MYL3</u>      |
|  | 0.878 | 0.044 | <u>HNF4G</u>     |
|  | 0.862 | 0.028 | <u>HIST1H3A</u>  |
|  | 0.868 | 0.034 | <u>GLRX3</u>     |
|  | 0.877 | 0.043 | <u>P2RX1</u>     |
|  | 0.866 | 0.032 | <u>CYP2C19</u>   |
|  | 0.858 | 0.024 | <u>PRSS21</u>    |
|  | 0.867 | 0.034 | <u>KCNK13</u>    |
|  | 0.873 | 0.039 | <u>GHRH</u>      |
|  | 0.867 | 0.033 | <u>GLTSCR1</u>   |
|  | 0.866 | 0.033 | <u>ALOX12B</u>   |
|  | 0.859 | 0.027 | <u>TECTA</u>     |
|  | 0.854 | 0.021 | <u>AQP8</u>      |

|  |       |       |            |
|--|-------|-------|------------|
|  | 0.860 | 0.028 | EFCAB6     |
|  | 0.869 | 0.037 | ERCC6L     |
|  | 0.867 | 0.036 | NDOR1      |
|  | 0.877 | 0.047 | FBXO42     |
|  | 0.851 | 0.021 | C10ORF92   |
|  | 0.858 | 0.030 | PDE5A      |
|  | 0.868 | 0.040 | TREX2      |
|  | 0.860 | 0.032 | SLC6A4     |
|  | 0.870 | 0.043 | APOBEC2    |
|  | 0.870 | 0.043 | HTR3A      |
|  | 0.858 | 0.031 | PRKCI      |
|  | 0.852 | 0.025 | LRRC17     |
|  | 0.870 | 0.043 | SYCP1      |
|  | 0.856 | 0.030 | VIL1       |
|  | 0.858 | 0.031 | C1ORF144   |
|  | 0.840 | 0.014 | BRIP1      |
|  | 0.842 | 0.015 | CCDC19     |
|  | 0.849 | 0.024 | PPP4R2     |
|  | 0.870 | 0.045 | C11ORF20   |
|  | 0.850 | 0.025 | EN2        |
|  | 0.857 | 0.033 | HTR6       |
|  | 0.870 | 0.045 | PCDHGB5    |
|  | 0.852 | 0.028 | FGF17      |
|  | 0.843 | 0.019 | VEGFC      |
|  | 0.849 | 0.025 | HAPLN2     |
|  | 0.857 | 0.033 | ID2B       |
|  | 0.859 | 0.035 | PRRG2      |
|  | 0.857 | 0.033 | ACTL7B     |
|  | 0.856 | 0.032 | PVRIG      |
|  | 0.871 | 0.047 | GPRC5D     |
|  | 0.844 | 0.021 | LRRC36     |
|  | 0.858 | 0.034 | KCNA4      |
|  | 0.868 | 0.045 | KLRD1      |
|  | 0.861 | 0.038 | DEFB126    |
|  | 0.853 | 0.030 | BMP3       |
|  | 0.841 | 0.018 | KCNJ15     |
|  | 0.847 | 0.025 | CDKL1      |
|  | 0.858 | 0.036 | ESPN       |
|  | 0.864 | 0.042 | ARVCF      |
|  | 0.858 | 0.035 | QPCTL      |
|  | 0.844 | 0.022 | LPA        |
|  | 0.847 | 0.026 | PRKACG     |
|  | 0.855 | 0.034 | FERMT1     |
|  | 0.846 | 0.025 | C2ORF56    |
|  | 0.848 | 0.027 | ZNF337     |
|  | 0.849 | 0.029 | FGF3       |
|  | 0.843 | 0.023 | HIST2H2AA3 |

|  |       |       |                  |
|--|-------|-------|------------------|
|  | 0.851 | 0.030 | <u>FAM120C</u>   |
|  | 0.860 | 0.039 | <u>SLC6A7</u>    |
|  | 0.847 | 0.028 | <u>RCVRN</u>     |
|  | 0.855 | 0.035 | <u>SCNN1G</u>    |
|  | 0.845 | 0.026 | <u>TAF4B</u>     |
|  | 0.856 | 0.037 | <u>MYCN</u>      |
|  | 0.857 | 0.039 | <u>IL1RL2</u>    |
|  | 0.849 | 0.031 | <u>MYH7</u>      |
|  | 0.838 | 0.021 | <u>LIPG</u>      |
|  | 0.844 | 0.026 | <u>KBTBD10</u>   |
|  | 0.844 | 0.026 | <u>CD160</u>     |
|  | 0.850 | 0.033 | LOC729164        |
|  | 0.860 | 0.043 | <u>MUC3A</u>     |
|  | 0.846 | 0.029 | <u>EXTL1</u>     |
|  | 0.841 | 0.025 | <u>ATP2A1</u>    |
|  | 0.848 | 0.032 | <u>CAV3</u>      |
|  | 0.842 | 0.026 | ZFYVE26          |
|  | 0.848 | 0.032 | <u>UTS2</u>      |
|  | 0.851 | 0.035 | <u>TPO</u>       |
|  | 0.862 | 0.046 | HMHB1            |
|  | 0.855 | 0.039 | <u>TRAF3IP1</u>  |
|  | 0.843 | 0.027 | C3ORF75          |
|  | 0.847 | 0.032 | <u>TNFAIP2</u>   |
|  | 0.831 | 0.016 | <u>DHX58</u>     |
|  | 0.835 | 0.020 | <u>HIST1H2BM</u> |
|  | 0.851 | 0.037 | <u>CREB3L1</u>   |
|  | 0.847 | 0.033 | <u>IFNA1</u>     |
|  | 0.840 | 0.026 | <u>KIF26B</u>    |
|  | 0.840 | 0.027 | <u>ITGA9</u>     |
|  | 0.837 | 0.024 | <u>DYSF</u>      |
|  | 0.853 | 0.040 | MAGOH2           |
|  | 0.851 | 0.038 | <u>GUCA1A</u>    |
|  | 0.844 | 0.031 | ZNF280D          |
|  | 0.837 | 0.025 | <u>RAD54B</u>    |
|  | 0.845 | 0.033 | FLJ13224         |
|  | 0.841 | 0.029 | <u>DNMT3L</u>    |
|  | 0.834 | 0.023 | HRC              |
|  | 0.848 | 0.037 | <u>NTN3</u>      |
|  | 0.829 | 0.018 | <u>LEFTY2</u>    |
|  | 0.839 | 0.028 | <u>C20ORF195</u> |
|  | 0.835 | 0.026 | <u>APLNR</u>     |
|  | 0.855 | 0.046 | <u>TOX</u>       |
|  | 0.844 | 0.035 | <u>FAM204A</u>   |
|  | 0.841 | 0.032 | <u>LTC4S</u>     |
|  | 0.849 | 0.041 | <u>HCN4</u>      |
|  | 0.842 | 0.034 | ZNF609           |
|  | 0.841 | 0.033 | <u>KDM6B</u>     |

|  |       |       |                   |
|--|-------|-------|-------------------|
|  | 0.852 | 0.045 | CALY              |
|  | 0.853 | 0.045 | TUBB4             |
|  | 0.863 | 0.056 | <u>PSG5</u>       |
|  | 0.845 | 0.038 | <u>CALB2</u>      |
|  | 0.856 | 0.050 | <u>KIAA1107</u>   |
|  | 0.838 | 0.032 | <u>HIST1H4L</u>   |
|  | 0.838 | 0.033 | LOC51145          |
|  | 0.837 | 0.032 | <u>HIST1H3I</u>   |
|  | 0.836 | 0.032 | <u>TRPC2</u>      |
|  | 0.832 | 0.027 | <u>P2RX3</u>      |
|  | 0.843 | 0.039 | <u>SLC6A16</u>    |
|  | 0.834 | 0.030 | KRT24             |
|  | 0.835 | 0.030 | <u>EXOSC1</u>     |
|  | 0.830 | 0.026 | <u>FBXW4P1</u>    |
|  | 0.842 | 0.037 | <u>KLRK1</u>      |
|  | 0.833 | 0.029 | <u>CCDC121</u>    |
|  | 0.847 | 0.042 | <u>TP53AIP1</u>   |
|  | 0.825 | 0.021 | RAG2              |
|  | 0.839 | 0.035 | <u>KLF8</u>       |
|  | 0.836 | 0.032 | <u>SLC26A10</u>   |
|  | 0.841 | 0.037 | <u>PCDHA5</u>     |
|  | 0.826 | 0.023 | <u>MAN1C1</u>     |
|  | 0.832 | 0.029 | <u>NCRNA00185</u> |
|  | 0.834 | 0.031 | <u>NFASC</u>      |
|  | 0.846 | 0.044 | RPL23AP53         |
|  | 0.856 | 0.054 | <u>MAML3</u>      |
|  | 0.836 | 0.034 | <u>CLDN9</u>      |
|  | 0.853 | 0.052 | <u>PPP2R3A</u>    |
|  | 0.837 | 0.036 | <u>LAMA1</u>      |
|  | 0.852 | 0.051 | <u>PSPN</u>       |
|  | 0.836 | 0.035 | <u>PRDM16</u>     |
|  | 0.829 | 0.029 | <u>TTC30A</u>     |
|  | 0.853 | 0.054 | <u>GALR3</u>      |
|  | 0.845 | 0.045 | <u>TMEM80</u>     |
|  | 0.845 | 0.045 | <u>C11ORF16</u>   |
|  | 0.835 | 0.035 | <u>LCN1</u>       |
|  | 0.827 | 0.028 | <u>KCNC2</u>      |
|  | 0.836 | 0.037 | <u>ATP9B</u>      |
|  | 0.837 | 0.038 | <u>C6ORF10</u>    |
|  | 0.833 | 0.034 | SIX5              |
|  | 0.822 | 0.024 | <u>IL12B</u>      |
|  | 0.829 | 0.031 | <u>CINP</u>       |
|  | 0.829 | 0.032 | <u>HIST1H2AL</u>  |
|  | 0.841 | 0.044 | <u>RASL10A</u>    |
|  | 0.826 | 0.028 | <u>NIN</u>        |
|  | 0.821 | 0.024 | <u>SAGE1</u>      |
|  | 0.826 | 0.028 | <u>EGR4</u>       |

|  |       |       |                  |
|--|-------|-------|------------------|
|  | 0.835 | 0.038 | <u>CA3</u>       |
|  | 0.825 | 0.029 | <u>FASTKD2</u>   |
|  | 0.841 | 0.045 | <u>IFNA16</u>    |
|  | 0.851 | 0.055 | <u>BTF3P11</u>   |
|  | 0.827 | 0.033 | <u>PSG11</u>     |
|  | 0.821 | 0.026 | <u>CDR1</u>      |
|  | 0.839 | 0.044 | <u>GPSM3</u>     |
|  | 0.841 | 0.046 | <u>ADORA1</u>    |
|  | 0.840 | 0.046 | <u>SLC9A7</u>    |
|  | 0.833 | 0.040 | <u>MAPK8</u>     |
|  | 0.839 | 0.045 | <u>CYP2W1</u>    |
|  | 0.844 | 0.051 | <u>NPPA</u>      |
|  | 0.809 | 0.015 | <u>BRD4</u>      |
|  | 0.834 | 0.040 | <u>ALOX12</u>    |
|  | 0.837 | 0.044 | <u>TNFRSF8</u>   |
|  | 0.832 | 0.038 | <u>TSHZ2</u>     |
|  | 0.823 | 0.030 | <u>MYH4</u>      |
|  | 0.815 | 0.023 | <u>TNFSF4</u>    |
|  | 0.822 | 0.029 | <u>LEP</u>       |
|  | 0.826 | 0.034 | <u>SLCO5A1</u>   |
|  | 0.840 | 0.048 | <u>GPR32</u>     |
|  | 0.841 | 0.049 | <u>PGK2</u>      |
|  | 0.817 | 0.025 | <u>UBN1</u>      |
|  | 0.831 | 0.040 | <u>TDRD1</u>     |
|  | 0.817 | 0.026 | <u>ENTPD3</u>    |
|  | 0.833 | 0.042 | <u>GUCY2F</u>    |
|  | 0.822 | 0.032 | <u>GJA3</u>      |
|  | 0.822 | 0.032 | <u>NAALADL1</u>  |
|  | 0.818 | 0.028 | <u>FOXC2</u>     |
|  | 0.812 | 0.022 | <u>HSD17B1</u>   |
|  | 0.809 | 0.020 | <u>MCF2L-AS1</u> |
|  | 0.844 | 0.055 | <u>GRPR</u>      |
|  | 0.833 | 0.045 | <u>ANKRD53</u>   |
|  | 0.821 | 0.033 | <u>DNASE1L2</u>  |
|  | 0.822 | 0.034 | <u>IL24</u>      |
|  | 0.829 | 0.041 | <u>MGC4859</u>   |
|  | 0.829 | 0.042 | <u>MKRN3</u>     |
|  | 0.822 | 0.035 | <u>ETV2</u>      |
|  | 0.826 | 0.038 | <u>RAI1</u>      |
|  | 0.843 | 0.056 | <u>LOC441204</u> |
|  | 0.828 | 0.042 | <u>ULK4</u>      |
|  | 0.833 | 0.046 | <u>TMEM143</u>   |
|  | 0.824 | 0.038 | <u>ZNF682</u>    |
|  | 0.820 | 0.034 | <u>REN</u>       |
|  | 0.816 | 0.030 | <u>HIST3H3</u>   |
|  | 0.826 | 0.040 | <u>ECE1</u>      |
|  | 0.825 | 0.040 | <u>UBXN1</u>     |

|  |       |       |                 |
|--|-------|-------|-----------------|
|  | 0.833 | 0.048 | <u>PRM1</u>     |
|  | 0.837 | 0.052 | TRAV8-3         |
|  | 0.825 | 0.041 | <u>RPLP2</u>    |
|  | 0.820 | 0.036 | <u>BICD1</u>    |
|  | 0.822 | 0.038 | GNG13           |
|  | 0.813 | 0.029 | <u>GABRR1</u>   |
|  | 0.828 | 0.044 | <u>PCDHB11</u>  |
|  | 0.812 | 0.028 | <u>MNX1</u>     |
|  | 0.831 | 0.048 | LOC100131532    |
|  | 0.822 | 0.039 | PKDREJ          |
|  | 0.832 | 0.049 | <u>BCL2L14</u>  |
|  | 0.843 | 0.060 | <u>RAPGEF1</u>  |
|  | 0.819 | 0.036 | <u>SOCS7</u>    |
|  | 0.822 | 0.039 | <u>MYOG</u>     |
|  | 0.821 | 0.039 | <u>DYRK2</u>    |
|  | 0.827 | 0.045 | JMJD5           |
|  | 0.820 | 0.038 | <u>LGR5</u>     |
|  | 0.826 | 0.045 | <u>TSPAN2</u>   |
|  | 0.828 | 0.047 | <u>NPVF</u>     |
|  | 0.824 | 0.043 | PKI55           |
|  | 0.810 | 0.030 | <u>CYSLTR1</u>  |
|  | 0.825 | 0.045 | <u>KCNK7</u>    |
|  | 0.835 | 0.055 | FGF22           |
|  | 0.813 | 0.034 | <u>ELP4</u>     |
|  | 0.812 | 0.032 | <u>ITGA1</u>    |
|  | 0.806 | 0.027 | <u>UCP2</u>     |
|  | 0.813 | 0.033 | <u>ABL2</u>     |
|  | 0.820 | 0.041 | <u>CD244</u>    |
|  | 0.831 | 0.052 | <u>TRIM46</u>   |
|  | 0.812 | 0.033 | <u>ATXN3L</u>   |
|  | 0.814 | 0.036 | <u>GALR1</u>    |
|  | 0.804 | 0.026 | DKFZP547G183    |
|  | 0.819 | 0.041 | <u>S1PR5</u>    |
|  | 0.829 | 0.051 | <u>HOXC5</u>    |
|  | 0.820 | 0.044 | <u>KRTAP9-9</u> |
|  | 0.833 | 0.056 | <u>SLC16A8</u>  |
|  | 0.802 | 0.026 | <u>ATP9A</u>    |
|  | 0.807 | 0.031 | <u>COL5A1</u>   |
|  | 0.820 | 0.044 | <u>ACAP1</u>    |
|  | 0.810 | 0.034 | <u>OR3A1</u>    |
|  | 0.833 | 0.057 | <u>DEF6</u>     |
|  | 0.816 | 0.040 | <u>COL8A1</u>   |
|  | 0.814 | 0.038 | <u>DHODH</u>    |
|  | 0.806 | 0.030 | KLRAP1          |
|  | 0.811 | 0.036 | <u>SRSF11</u>   |
|  | 0.822 | 0.047 | <u>ADRB1</u>    |
|  | 0.806 | 0.031 | C8ORF84         |

|  |       |       |                  |
|--|-------|-------|------------------|
|  | 0.825 | 0.050 | <u>TAPT1</u>     |
|  | 0.823 | 0.048 | <u>C9ORF53</u>   |
|  | 0.820 | 0.045 | <u>CELP</u>      |
|  | 0.813 | 0.038 | <u>NPPC</u>      |
|  | 0.806 | 0.032 | C15ORF5          |
|  | 0.833 | 0.059 | <u>LTK</u>       |
|  | 0.812 | 0.038 | ZNF484           |
|  | 0.814 | 0.040 | <u>CACNA2D1</u>  |
|  | 0.809 | 0.035 | <u>LSAMP</u>     |
|  | 0.800 | 0.027 | <u>PORCN</u>     |
|  | 0.811 | 0.038 | <u>PLXNA2</u>    |
|  | 0.825 | 0.052 | <u>NPAS1</u>     |
|  | 0.805 | 0.034 | <u>CYP4F2</u>    |
|  | 0.813 | 0.041 | <u>SMCP</u>      |
|  | 0.811 | 0.039 | <u>CLEC4E</u>    |
|  | 0.819 | 0.047 | <u>ACAA2</u>     |
|  | 0.815 | 0.044 | ZNF442           |
|  | 0.806 | 0.035 | <u>COL6A3</u>    |
|  | 0.803 | 0.032 | <u>CDX1</u>      |
|  | 0.803 | 0.032 | ZMYND10          |
|  | 0.831 | 0.061 | <u>CCBP2</u>     |
|  | 0.830 | 0.060 | <u>SPAG11B</u>   |
|  | 0.823 | 0.054 | <u>SLC19A3</u>   |
|  | 0.805 | 0.036 | <u>TNFRSF13B</u> |
|  | 0.808 | 0.039 | <u>VSTM4</u>     |
|  | 0.807 | 0.038 | <u>PEG3</u>      |
|  | 0.807 | 0.038 | <u>MAP3K10</u>   |
|  | 0.813 | 0.044 | <u>CCDC30</u>    |
|  | 0.811 | 0.043 | ZP2              |
|  | 0.815 | 0.046 | <u>SATB2</u>     |
|  | 0.790 | 0.022 | C14ORF133        |
|  | 0.807 | 0.040 | <u>RPE65</u>     |
|  | 0.820 | 0.052 | <u>LGALS14</u>   |
|  | 0.826 | 0.058 | <u>CDSN</u>      |
|  | 0.800 | 0.033 | POLR2J4          |
|  | 0.808 | 0.041 | <u>CLDN11</u>    |
|  | 0.806 | 0.039 | <u>GPRC5B</u>    |
|  | 0.811 | 0.044 | <u>ANGPTL7</u>   |
|  | 0.805 | 0.039 | <u>KLHL23</u>    |
|  | 0.807 | 0.041 | <u>TMEM19</u>    |
|  | 0.805 | 0.040 | ZNF253           |
|  | 0.806 | 0.040 | <u>PURG</u>      |
|  | 0.807 | 0.041 | <u>BCMO1</u>     |
|  | 0.802 | 0.037 | <u>GPR132</u>    |
|  | 0.807 | 0.042 | <u>IL21R</u>     |
|  | 0.814 | 0.050 | CATSPERG         |
|  | 0.818 | 0.053 | <u>LOXL3</u>     |

|  |       |       |                   |
|--|-------|-------|-------------------|
|  | 0.799 | 0.035 | ZNF257            |
|  | 0.812 | 0.047 | <u>HIST1H3E</u>   |
|  | 0.820 | 0.056 | <u>SEZ6L</u>      |
|  | 0.818 | 0.054 | <u>STK3</u>       |
|  | 0.809 | 0.045 | <u>PRO2012</u>    |
|  | 0.791 | 0.028 | <u>PDZD7</u>      |
|  | 0.805 | 0.042 | <u>PTTG2</u>      |
|  | 0.800 | 0.038 | GIPR              |
|  | 0.817 | 0.055 | <u>TGFBF1</u>     |
|  | 0.799 | 0.038 | <u>ACTL7A</u>     |
|  | 0.812 | 0.050 | <u>TIAL1</u>      |
|  | 0.822 | 0.060 | C11ORF41          |
|  | 0.790 | 0.028 | <u>USP53</u>      |
|  | 0.810 | 0.049 | <u>OTUB2</u>      |
|  | 0.793 | 0.031 | <u>C14ORF79</u>   |
|  | 0.806 | 0.045 | <u>RIBC2</u>      |
|  | 0.812 | 0.051 | <u>HSD17B3</u>    |
|  | 0.815 | 0.054 | <u>EDN2</u>       |
|  | 0.798 | 0.037 | CORO7             |
|  | 0.817 | 0.057 | <u>DAZL</u>       |
|  | 0.797 | 0.039 | <u>LRRC2</u>      |
|  | 0.796 | 0.038 | <u>MCM3AP-AS1</u> |
|  | 0.796 | 0.037 | <u>CDKN2D</u>     |
|  | 0.805 | 0.047 | <u>ATP6AP2</u>    |
|  | 0.797 | 0.040 | SPATA6            |
|  | 0.790 | 0.032 | <u>RALGAP1</u>    |
|  | 0.806 | 0.048 | <u>CCR8</u>       |
|  | 0.806 | 0.049 | LYZL6             |
|  | 0.794 | 0.037 | <u>SHBG</u>       |
|  | 0.789 | 0.033 | <u>PITX2</u>      |
|  | 0.807 | 0.051 | <u>TMEM209</u>    |
|  | 0.791 | 0.035 | <u>KIF24</u>      |
|  | 0.797 | 0.041 | <u>KRT36</u>      |
|  | 0.806 | 0.050 | <u>GPR63</u>      |
|  | 0.816 | 0.060 | <u>KCNV1</u>      |
|  | 0.791 | 0.036 | <u>FOXO3</u>      |
|  | 0.805 | 0.050 | <u>LMAN1L</u>     |
|  | 0.800 | 0.046 | <u>ARSD</u>       |
|  | 0.800 | 0.046 | <u>BPNT1</u>      |
|  | 0.798 | 0.044 | <u>SOSTDC1</u>    |
|  | 0.810 | 0.056 | <u>SOX15</u>      |
|  | 0.784 | 0.030 | GRRP1             |
|  | 0.793 | 0.040 | C14ORF102         |
|  | 0.795 | 0.042 | <u>MEP1B</u>      |
|  | 0.825 | 0.072 | <u>GRIK4</u>      |
|  | 0.805 | 0.052 | HHLA1             |
|  | 0.794 | 0.042 | <u>DOC2B</u>      |

|  |       |       |                 |
|--|-------|-------|-----------------|
|  | 0.802 | 0.050 | <u>MAGEL2</u>   |
|  | 0.803 | 0.051 | <u>TEX13B</u>   |
|  | 0.788 | 0.036 | <u>PCDHGA8</u>  |
|  | 0.789 | 0.038 | <u>SLC25A17</u> |
|  | 0.807 | 0.056 | <u>SCN9A</u>    |
|  | 0.790 | 0.039 | <u>EVC</u>      |
|  | 0.808 | 0.058 | <u>EMR3</u>     |
|  | 0.788 | 0.038 | <u>DUSP26</u>   |
|  | 0.796 | 0.047 | <u>UTF1</u>     |
|  | 0.791 | 0.041 | <u>GPR124</u>   |
|  | 0.814 | 0.065 | <u>MIR600HG</u> |
|  | 0.795 | 0.045 | <u>KAZALD1</u>  |
|  | 0.794 | 0.045 | <u>NTSR2</u>    |
|  | 0.790 | 0.041 | <u>HTR1A</u>    |
|  | 0.808 | 0.060 | <u>ITGA4</u>    |
|  | 0.788 | 0.039 | <u>RFXAP</u>    |
|  | 0.780 | 0.032 | <u>CCDC87</u>   |
|  | 0.804 | 0.057 | <u>FXYD1</u>    |
|  | 0.797 | 0.049 | <u>ZNF528</u>   |
|  | 0.799 | 0.052 | <u>SOX5</u>     |
|  | 0.791 | 0.044 | <u>PLAGL2</u>   |
|  | 0.791 | 0.044 | <u>OPRD1</u>    |
|  | 0.795 | 0.048 | <u>ATXN7L1</u>  |
|  | 0.785 | 0.038 | <u>WNT1</u>     |
|  | 0.789 | 0.042 | <u>TRDN</u>     |
|  | 0.796 | 0.050 | <u>PTPRC</u>    |
|  | 0.793 | 0.047 | <u>ADAMTS20</u> |
|  | 0.803 | 0.057 | <u>DNAJC28</u>  |
|  | 0.801 | 0.055 | <u>SCAPER</u>   |
|  | 0.802 | 0.056 | <u>CACNA1F</u>  |
|  | 0.795 | 0.049 | <u>GPR25</u>    |
|  | 0.798 | 0.053 | <u>RPL35A</u>   |
|  | 0.798 | 0.053 | <u>OR2B2</u>    |
|  | 0.777 | 0.032 | <u>COLQ</u>     |
|  | 0.788 | 0.044 | <u>SEMA3F</u>   |
|  | 0.798 | 0.054 | <u>DCAF4</u>    |
|  | 0.805 | 0.062 | <u>FZD8</u>     |
|  | 0.797 | 0.054 | <u>CST8</u>     |
|  | 0.802 | 0.060 | <u>BMP15</u>    |
|  | 0.794 | 0.051 | <u>ADAM29</u>   |
|  | 0.812 | 0.069 | <u>FAM153A</u>  |
|  | 0.786 | 0.043 | <u>ZNF345</u>   |
|  | 0.799 | 0.057 | <u>DUSP21</u>   |
|  | 0.790 | 0.049 | <u>FASLG</u>    |
|  | 0.793 | 0.051 | <u>IGH@</u>     |
|  | 0.780 | 0.039 | <u>HAND2</u>    |
|  | 0.789 | 0.047 | <u>ZNRF4</u>    |

|  |       |       |                 |
|--|-------|-------|-----------------|
|  | 0.787 | 0.046 | <u>INPP5D</u>   |
|  | 0.780 | 0.040 | ZNF204P         |
|  | 0.790 | 0.049 | <u>RNF208</u>   |
|  | 0.791 | 0.050 | <u>TREML2</u>   |
|  | 0.779 | 0.039 | <u>HIST1H4B</u> |
|  | 0.785 | 0.045 | <u>TIGD6</u>    |
|  | 0.800 | 0.061 | <u>TLR6</u>     |
|  | 0.799 | 0.059 | <u>AGTR2</u>    |
|  | 0.800 | 0.060 | <u>MIR622</u>   |
|  | 0.795 | 0.055 | <u>NKX2-8</u>   |
|  | 0.784 | 0.045 | <u>PCDHA6</u>   |
|  | 0.778 | 0.040 | <u>SLC22A6</u>  |
|  | 0.796 | 0.057 | <u>C1ORF95</u>  |
|  | 0.789 | 0.050 | <u>PBRM1</u>    |
|  | 0.808 | 0.070 | <u>BCAT2</u>    |
|  | 0.803 | 0.065 | <u>GPR12</u>    |
|  | 0.806 | 0.069 | <u>AP2A2</u>    |
|  | 0.781 | 0.045 | <u>TRPC4</u>    |
|  | 0.776 | 0.039 | <u>EDNRA</u>    |
|  | 0.778 | 0.041 | <u>IKZF3</u>    |
|  | 0.788 | 0.052 | <u>KIAA0485</u> |
|  | 0.791 | 0.055 | <u>FAM63B</u>   |
|  | 0.788 | 0.052 | PDC             |
|  | 0.790 | 0.054 | <u>POU4F3</u>   |
|  | 0.795 | 0.060 | <u>KRT84</u>    |
|  | 0.788 | 0.052 | <u>HOXA6</u>    |
|  | 0.780 | 0.045 | <u>MYEF2</u>    |
|  | 0.784 | 0.049 | <u>CHRNA10</u>  |
|  | 0.781 | 0.047 | <u>YY2</u>      |
|  | 0.773 | 0.038 | C20ORF46        |
|  | 0.779 | 0.044 | <u>GABRG3</u>   |
|  | 0.770 | 0.036 | <u>HIST1H1T</u> |
|  | 0.780 | 0.046 | <u>RIC3</u>     |
|  | 0.803 | 0.069 | <u>EMILIN2</u>  |
|  | 0.797 | 0.063 | <u>RPL10</u>    |
|  | 0.791 | 0.057 | <u>TMEM151B</u> |
|  | 0.782 | 0.048 | <u>VHL</u>      |
|  | 0.795 | 0.061 | <u>ST8SIA2</u>  |
|  | 0.787 | 0.054 | <u>SYNGR1</u>   |
|  | 0.775 | 0.043 | <u>IL36A</u>    |
|  | 0.773 | 0.040 | ZNF254          |
|  | 0.779 | 0.047 | <u>ERC2</u>     |
|  | 0.794 | 0.062 | <u>ANKFY1</u>   |
|  | 0.773 | 0.041 | <u>KRT7</u>     |
|  | 0.800 | 0.069 | <u>TRAF3IP3</u> |
|  | 0.782 | 0.051 | <u>UCHL5</u>    |
|  | 0.799 | 0.068 | <u>SLC4A5</u>   |

|  |       |       |                  |
|--|-------|-------|------------------|
|  | 0.774 | 0.043 | <u>PRDM8</u>     |
|  | 0.778 | 0.048 | <u>PIN1P1</u>    |
|  | 0.783 | 0.053 | NEUROG2          |
|  | 0.789 | 0.059 | <u>KHSRP</u>     |
|  | 0.775 | 0.045 | <u>RASSF8</u>    |
|  | 0.776 | 0.046 | SP3P             |
|  | 0.779 | 0.050 | LOC257152        |
|  | 0.795 | 0.066 | <u>SLC26A3</u>   |
|  | 0.799 | 0.070 | DUX2             |
|  | 0.769 | 0.040 | <u>IL19</u>      |
|  | 0.772 | 0.044 | <u>HIST1H2BO</u> |
|  | 0.781 | 0.052 | <u>TBL1Y</u>     |
|  | 0.772 | 0.044 | <u>GCM1</u>      |
|  | 0.775 | 0.046 | C7ORF54          |
|  | 0.767 | 0.039 | KIAA1704         |
|  | 0.766 | 0.038 | <u>DDI2</u>      |
|  | 0.779 | 0.052 | <u>HIST1H4G</u>  |
|  | 0.772 | 0.045 | <u>GOLGA8A</u>   |
|  | 0.796 | 0.069 | <u>INSL5</u>     |
|  | 0.778 | 0.051 | <u>PPY2</u>      |
|  | 0.764 | 0.038 | <u>SH3D21</u>    |
|  | 0.785 | 0.058 | LOC57399         |
|  | 0.772 | 0.046 | GLP2R            |
|  | 0.786 | 0.059 | <u>INHA</u>      |
|  | 0.774 | 0.048 | <u>HIST1H2BN</u> |
|  | 0.777 | 0.051 | C8ORF60          |
|  | 0.768 | 0.042 | <u>IL1RAPL1</u>  |
|  | 0.789 | 0.063 | EDDM3B           |
|  | 0.776 | 0.051 | ACCN3            |
|  | 0.796 | 0.071 | <u>FAM90A1</u>   |
|  | 0.769 | 0.044 | RAD21L1          |
|  | 0.772 | 0.047 | <u>FFAR3</u>     |
|  | 0.777 | 0.053 | <u>DIAPH3</u>    |
|  | 0.768 | 0.045 | <u>TONSL</u>     |
|  | 0.768 | 0.045 | <u>FBP2</u>      |
|  | 0.783 | 0.060 | <u>NIPBL</u>     |
|  | 0.771 | 0.048 | <u>ATP1B4</u>    |
|  | 0.758 | 0.035 | <u>TNIP3</u>     |
|  | 0.766 | 0.043 | <u>SOX18</u>     |
|  | 0.785 | 0.063 | LOC100130741     |
|  | 0.777 | 0.055 | <u>VPS13C</u>    |
|  | 0.775 | 0.052 | <u>SEC14L4</u>   |
|  | 0.758 | 0.036 | <u>KRT8P12</u>   |
|  | 0.776 | 0.054 | <u>CDX4</u>      |
|  | 0.764 | 0.041 | <u>PTMS</u>      |
|  | 0.768 | 0.046 | <u>SPTLC3</u>    |
|  | 0.768 | 0.046 | LOC284244        |

|  |       |       |                 |
|--|-------|-------|-----------------|
|  | 0.783 | 0.061 | <u>C6ORF105</u> |
|  | 0.772 | 0.050 | OCM2            |
|  | 0.785 | 0.064 | <u>BIN2</u>     |
|  | 0.780 | 0.058 | <u>PDE6H</u>    |
|  | 0.791 | 0.070 | <u>NMUR1</u>    |
|  | 0.774 | 0.054 | <u>SNRNP200</u> |
|  | 0.768 | 0.048 | <u>SCGB1D1</u>  |
|  | 0.781 | 0.061 | <u>PDYN</u>     |
|  | 0.769 | 0.050 | <u>HSF1</u>     |
|  | 0.806 | 0.087 | <u>CXCR1</u>    |
|  | 0.752 | 0.033 | <u>CCDC15</u>   |
|  | 0.774 | 0.055 | ZNF234          |
|  | 0.749 | 0.030 | <u>RASIP1</u>   |
|  | 0.760 | 0.041 | <u>ATAD5</u>    |
|  | 0.785 | 0.067 | <u>TAS2R3</u>   |
|  | 0.765 | 0.047 | <u>PLXNB2</u>   |
|  | 0.767 | 0.050 | <u>COX6A2</u>   |
|  | 0.778 | 0.061 | <u>KRT83</u>    |
|  | 0.780 | 0.064 | <u>SSX5</u>     |
|  | 0.781 | 0.065 | <u>CLEC5A</u>   |
|  | 0.749 | 0.033 | <u>POLI</u>     |
|  | 0.767 | 0.051 | CXORF36         |
|  | 0.757 | 0.041 | <u>TRA2A</u>    |
|  | 0.772 | 0.057 | <u>FAM76A</u>   |
|  | 0.762 | 0.046 | <u>HMGA1</u>    |
|  | 0.787 | 0.072 | <u>GCK</u>      |
|  | 0.778 | 0.063 | <u>WRNIP1</u>   |
|  | 0.775 | 0.060 | FAM186A         |
|  | 0.768 | 0.054 | <u>CASC5</u>    |
|  | 0.773 | 0.060 | <u>ATF6B</u>    |
|  | 0.762 | 0.049 | <u>MYF6</u>     |
|  | 0.777 | 0.064 | <u>EIF4G2</u>   |
|  | 0.770 | 0.057 | <u>LATS1</u>    |
|  | 0.769 | 0.056 | ZNF74           |
|  | 0.783 | 0.071 | <u>KCNA10</u>   |
|  | 0.757 | 0.045 | FSCN2           |
|  | 0.770 | 0.058 | <u>LARP7</u>    |
|  | 0.787 | 0.074 | <u>GK2</u>      |
|  | 0.778 | 0.066 | <u>SYDE1</u>    |
|  | 0.777 | 0.065 | <u>KIAA1751</u> |
|  | 0.753 | 0.041 | <u>OVOL2</u>    |
|  | 0.775 | 0.064 | <u>SP4</u>      |
|  | 0.751 | 0.040 | <u>STK17A</u>   |
|  | 0.770 | 0.058 | ZNF493          |
|  | 0.754 | 0.043 | <u>BRCA2</u>    |
|  | 0.770 | 0.060 | MYH8            |
|  | 0.766 | 0.056 | C20ORF7         |

|  |       |       |                  |
|--|-------|-------|------------------|
|  | 0.744 | 0.034 | <u>FOLR3</u>     |
|  | 0.750 | 0.040 | <u>SLC13A2</u>   |
|  | 0.761 | 0.051 | <u>BTBD18</u>    |
|  | 0.773 | 0.063 | <u>TAS2R8</u>    |
|  | 0.756 | 0.047 | <u>ZBTB6</u>     |
|  | 0.766 | 0.057 | <u>POMC</u>      |
|  | 0.750 | 0.041 | <u>PITX3</u>     |
|  | 0.757 | 0.048 | <u>UBE2I</u>     |
|  | 0.779 | 0.070 | <u>VRK3</u>      |
|  | 0.782 | 0.073 | <u>ITIH4</u>     |
|  | 0.758 | 0.050 | <u>ZNF223</u>    |
|  | 0.774 | 0.067 | <u>CNGB3</u>     |
|  | 0.760 | 0.053 | <u>TAOK2</u>     |
|  | 0.766 | 0.059 | <u>DOT1L</u>     |
|  | 0.778 | 0.072 | <u>PFKFB4</u>    |
|  | 0.775 | 0.069 | <u>KLK15</u>     |
|  | 0.753 | 0.047 | <u>LOR</u>       |
|  | 0.754 | 0.049 | <u>MAGEB3</u>    |
|  | 0.777 | 0.071 | <u>MYO3A</u>     |
|  | 0.763 | 0.058 | <u>GJC1</u>      |
|  | 0.759 | 0.055 | <u>SEMA3A</u>    |
|  | 0.766 | 0.061 | <u>PTH</u>       |
|  | 0.763 | 0.058 | <u>BTNL3</u>     |
|  | 0.751 | 0.047 | <u>ZNF157</u>    |
|  | 0.776 | 0.072 | <u>PLA2G2E</u>   |
|  | 0.770 | 0.067 | <u>ABCB9</u>     |
|  | 0.768 | 0.065 | <u>C3ORF32</u>   |
|  | 0.776 | 0.073 | <u>CACNG1</u>    |
|  | 0.783 | 0.081 | <u>GRIA1</u>     |
|  | 0.772 | 0.069 | <u>AVIL</u>      |
|  | 0.766 | 0.063 | <u>METTL19</u>   |
|  | 0.772 | 0.070 | <u>KIR2DS4</u>   |
|  | 0.775 | 0.073 | <u>GABARAPL3</u> |
|  | 0.759 | 0.057 | <u>SLC13A1</u>   |
|  | 0.756 | 0.054 | <u>MCF2L2</u>    |
|  | 0.773 | 0.071 | <u>PDE3B</u>     |
|  | 0.760 | 0.058 | <u>DTNB</u>      |
|  | 0.745 | 0.044 | <u>NEUROG3</u>   |
|  | 0.768 | 0.066 | <u>DGKQ</u>      |
|  | 0.758 | 0.057 | <u>PRDM10</u>    |
|  | 0.764 | 0.064 | <u>HOXD12</u>    |
|  | 0.776 | 0.076 | <u>LINC00483</u> |
|  | 0.745 | 0.045 | <u>C3ORF36</u>   |
|  | 0.743 | 0.042 | <u>CHML</u>      |
|  | 0.757 | 0.057 | <u>CARD10</u>    |
|  | 0.759 | 0.059 | <u>CGGBP1</u>    |
|  | 0.780 | 0.080 | <u>OR12D3</u>    |

|  |       |       |                 |
|--|-------|-------|-----------------|
|  | 0.750 | 0.051 | <u>OR3A2</u>    |
|  | 0.752 | 0.053 | <u>LHCGR</u>    |
|  | 0.767 | 0.068 | TUBB4Q          |
|  | 0.754 | 0.055 | <u>ZDHC17</u>   |
|  | 0.760 | 0.062 | <u>CBFA2T2</u>  |
|  | 0.767 | 0.068 | <u>WNT3</u>     |
|  | 0.768 | 0.069 | SDK2            |
|  | 0.760 | 0.062 | NHLH2           |
|  | 0.761 | 0.063 | MYOZ3           |
|  | 0.763 | 0.065 | <u>PLEKHM1</u>  |
|  | 0.755 | 0.057 | <u>MAPK4</u>    |
|  | 0.776 | 0.078 | RIMS1           |
|  | 0.756 | 0.058 | <u>ROS1</u>     |
|  | 0.758 | 0.060 | <u>CPSF1</u>    |
|  | 0.764 | 0.066 | <u>C22ORF43</u> |
|  | 0.737 | 0.040 | <u>P2RY10</u>   |
|  | 0.756 | 0.059 | <u>HGF</u>      |
|  | 0.757 | 0.061 | <u>AZU1</u>     |
|  | 0.757 | 0.061 | LOC1720         |
|  | 0.750 | 0.054 | <u>GALNT3</u>   |
|  | 0.764 | 0.069 | <u>METTL10</u>  |
|  | 0.753 | 0.058 | <u>TRIM17</u>   |
|  | 0.752 | 0.056 | C21ORF62        |
|  | 0.775 | 0.079 | <u>BRS3</u>     |
|  | 0.771 | 0.076 | <u>HCRT</u>     |
|  | 0.771 | 0.076 | C22ORF24        |
|  | 0.774 | 0.079 | POU6F2          |
|  | 0.751 | 0.057 | <u>NSL1</u>     |
|  | 0.760 | 0.066 | <u>DNAH2</u>    |
|  | 0.755 | 0.061 | TCP11           |
|  | 0.759 | 0.065 | <u>CYP2U1</u>   |
|  | 0.749 | 0.055 | <u>CNTN6</u>    |
|  | 0.752 | 0.059 | <u>DPH5</u>     |
|  | 0.743 | 0.050 | <u>GCM2</u>     |
|  | 0.752 | 0.059 | <u>RPL5</u>     |
|  | 0.769 | 0.076 | <u>MC3R</u>     |
|  | 0.752 | 0.060 | <u>MRPS18C</u>  |
|  | 0.752 | 0.060 | <u>TBC1D30</u>  |
|  | 0.759 | 0.067 | <u>PCDHGA11</u> |
|  | 0.758 | 0.067 | ZIC4            |
|  | 0.745 | 0.054 | <u>UCP1</u>     |
|  | 0.737 | 0.046 | WDR52           |
|  | 0.751 | 0.060 | <u>RFC1</u>     |
|  | 0.747 | 0.056 | <u>EPB41L4A</u> |
|  | 0.747 | 0.057 | <u>PRKD1</u>    |
|  | 0.749 | 0.058 | KRTAP5-9        |
|  | 0.745 | 0.055 | <u>DGKE</u>     |

|       |       |                 |
|-------|-------|-----------------|
| 0.749 | 0.059 | CT62            |
| 0.750 | 0.060 | <u>EXOC6B</u>   |
| 0.761 | 0.071 | <u>PMS2P4</u>   |
| 0.772 | 0.083 | GPR3            |
| 0.748 | 0.059 | AGBL3           |
| 0.758 | 0.068 | ZNF81           |
| 0.738 | 0.049 | FOXL1           |
| 0.747 | 0.058 | CCDC33          |
| 0.754 | 0.066 | LOC100134713    |
| 0.754 | 0.066 | <u>TSNAXIP1</u> |
| 0.762 | 0.074 | <u>MRE11A</u>   |
| 0.749 | 0.061 | <u>MYO1A</u>    |
| 0.762 | 0.075 | <u>RPS6KA6</u>  |
| 0.769 | 0.082 | LOC440792       |
| 0.743 | 0.056 | <u>IQCH</u>     |
| 0.783 | 0.096 | <u>NXPH4</u>    |
| 0.757 | 0.071 | <u>TTC18</u>    |
| 0.754 | 0.068 | <u>ARL2BP</u>   |
| 0.742 | 0.056 | <u>SLC25A21</u> |
| 0.755 | 0.069 | <u>OLFM1</u>    |
| 0.727 | 0.042 | <u>CRELD2</u>   |
| 0.741 | 0.056 | <u>ERGIC3</u>   |
| 0.743 | 0.058 | <u>PROSC</u>    |
| 0.744 | 0.059 | <u>PLK4</u>     |
| 0.736 | 0.052 | <u>LRRC8B</u>   |
| 0.743 | 0.059 | <u>OTOF</u>     |
| 0.755 | 0.071 | <u>IFNAR1</u>   |
| 0.762 | 0.079 | <u>PCDHB6</u>   |
| 0.738 | 0.054 | AMELX           |
| 0.773 | 0.089 | <u>ADAMTS8</u>  |
| 0.746 | 0.063 | <u>UGGT1</u>    |
| 0.741 | 0.058 | <u>CSN2</u>     |
| 0.749 | 0.066 | <u>TNFSF11</u>  |
| 0.752 | 0.069 | <u>FRAS1</u>    |
| 0.770 | 0.087 | PPBPL2          |
| 0.744 | 0.061 | ZNF41           |
| 0.746 | 0.064 | PCDHGA10        |
| 0.752 | 0.070 | <u>OMP</u>      |
| 0.761 | 0.079 | DNAH6           |
| 0.766 | 0.085 | CHST4           |
| 0.768 | 0.086 | LRRC68          |
| 0.748 | 0.067 | C2ORF55         |
| 0.734 | 0.053 | <u>NOL10</u>    |
| 0.748 | 0.067 | <u>ATXN2L</u>   |
| 0.755 | 0.073 | <u>GNPTAB</u>   |
| 0.734 | 0.054 | <u>DLC1</u>     |
| 0.720 | 0.040 | <u>ATG2B</u>    |

|  |       |       |                  |
|--|-------|-------|------------------|
|  | 0.753 | 0.073 | <u>TTC12</u>     |
|  | 0.742 | 0.062 | <u>CFHR4</u>     |
|  | 0.746 | 0.067 | <u>TSGA10</u>    |
|  | 0.736 | 0.057 | <u>CETP</u>      |
|  | 0.742 | 0.064 | <u>KLHL29</u>    |
|  | 0.741 | 0.063 | <u>CCDC144A</u>  |
|  | 0.758 | 0.080 | PLA2G2F          |
|  | 0.737 | 0.059 | FAM205B          |
|  | 0.721 | 0.043 | <u>SIDT1</u>     |
|  | 0.736 | 0.058 | <u>LIM2</u>      |
|  | 0.741 | 0.063 | <u>RFPL1</u>     |
|  | 0.736 | 0.058 | RAB9BP1          |
|  | 0.736 | 0.058 | FOXH1            |
|  | 0.731 | 0.053 | ZNF225           |
|  | 0.738 | 0.060 | <u>SCIN</u>      |
|  | 0.732 | 0.055 | <u>PHF14</u>     |
|  | 0.756 | 0.079 | <u>JPH3</u>      |
|  | 0.753 | 0.076 | <u>PART1</u>     |
|  | 0.732 | 0.055 | <u>DPF1</u>      |
|  | 0.741 | 0.065 | <u>HIST1H2BL</u> |
|  | 0.743 | 0.067 | TCP10            |
|  | 0.741 | 0.064 | <u>SLC25A42</u>  |
|  | 0.722 | 0.046 | <u>FRAT1</u>     |
|  | 0.742 | 0.065 | <u>TRAF3IP2</u>  |
|  | 0.749 | 0.073 | <u>GRIA4</u>     |
|  | 0.735 | 0.059 | <u>CACNA1C</u>   |
|  | 0.726 | 0.050 | ZNF273           |
|  | 0.730 | 0.054 | <u>GTPBP10</u>   |
|  | 0.743 | 0.068 | <u>PDE4B</u>     |
|  | 0.750 | 0.075 | <u>KCNE1</u>     |
|  | 0.737 | 0.063 | <u>SRSF7</u>     |
|  | 0.739 | 0.065 | <u>TELO2</u>     |
|  | 0.746 | 0.072 | <u>RAPSN</u>     |
|  | 0.744 | 0.070 | <u>GAN</u>       |
|  | 0.739 | 0.065 | <u>LAT2</u>      |
|  | 0.745 | 0.072 | <u>CRB1</u>      |
|  | 0.741 | 0.068 | <u>PEX5</u>      |
|  | 0.725 | 0.053 | <u>CEP97</u>     |
|  | 0.732 | 0.061 | <u>POU3F3</u>    |
|  | 0.752 | 0.081 | C2ORF83          |
|  | 0.751 | 0.081 | <u>CRYBB1</u>    |
|  | 0.746 | 0.076 | <u>SLC6A5</u>    |
|  | 0.723 | 0.053 | <u>PRR14L</u>    |
|  | 0.741 | 0.072 | <u>MLLT1</u>     |
|  | 0.735 | 0.065 | <u>POLRMT</u>    |
|  | 0.719 | 0.049 | KRT76            |
|  | 0.734 | 0.065 | <u>SLC7A4</u>    |

|  |       |       |                  |
|--|-------|-------|------------------|
|  | 0.732 | 0.063 | PCDHB1           |
|  | 0.727 | 0.059 | <u>TMEM156</u>   |
|  | 0.750 | 0.082 | <u>GREB1L</u>    |
|  | 0.726 | 0.058 | <u>IFIH1</u>     |
|  | 0.739 | 0.072 | <u>HTR1B</u>     |
|  | 0.732 | 0.064 | <u>ACOXL</u>     |
|  | 0.746 | 0.078 | FLJ20712         |
|  | 0.732 | 0.065 | OR7E24           |
|  | 0.726 | 0.059 | <u>EFNA2</u>     |
|  | 0.719 | 0.052 | <u>GHSR</u>      |
|  | 0.721 | 0.054 | <u>MPPED2</u>    |
|  | 0.732 | 0.066 | <u>STAG3L4</u>   |
|  | 0.725 | 0.059 | <u>SEN6</u>      |
|  | 0.744 | 0.079 | <u>AGA</u>       |
|  | 0.743 | 0.077 | <u>CEACAM7</u>   |
|  | 0.733 | 0.067 | <u>FAM135A</u>   |
|  | 0.714 | 0.049 | <u>DUSP13</u>    |
|  | 0.731 | 0.065 | <u>PACRG</u>     |
|  | 0.719 | 0.054 | <u>ARHGEF10</u>  |
|  | 0.747 | 0.082 | <u>ADM2</u>      |
|  | 0.731 | 0.065 | <u>SPACA1</u>    |
|  | 0.720 | 0.054 | <u>GPR77</u>     |
|  | 0.721 | 0.056 | <u>HIST1H4D</u>  |
|  | 0.724 | 0.060 | <u>MYH7B</u>     |
|  | 0.725 | 0.061 | <u>LINC00115</u> |
|  | 0.741 | 0.077 | <u>TBX4</u>      |
|  | 0.728 | 0.064 | <u>BPESC1</u>    |
|  | 0.723 | 0.060 | <u>SPO11</u>     |
|  | 0.746 | 0.082 | <u>TGFB2</u>     |
|  | 0.713 | 0.050 | <u>TIPARP</u>    |
|  | 0.717 | 0.054 | ARHGEF38         |
|  | 0.735 | 0.073 | ZNF208           |
|  | 0.727 | 0.065 | <u>GP6</u>       |
|  | 0.722 | 0.061 | <u>EPHX3</u>     |
|  | 0.729 | 0.068 | LRIT1            |
|  | 0.730 | 0.069 | NEUROD4          |
|  | 0.734 | 0.073 | <u>NRXN3</u>     |
|  | 0.730 | 0.070 | <u>ADAM20</u>    |
|  | 0.720 | 0.060 | <u>IFNB1</u>     |
|  | 0.734 | 0.074 | <u>RFX3</u>      |
|  | 0.726 | 0.066 | <u>HSPG2</u>     |
|  | 0.751 | 0.092 | <u>EXOSC2</u>    |
|  | 0.736 | 0.077 | POM121           |
|  | 0.720 | 0.061 | PCDHGA9          |
|  | 0.732 | 0.073 | OR2B6            |
|  | 0.704 | 0.045 | <u>HIC1</u>      |
|  | 0.729 | 0.071 | <u>SRY</u>       |

|  |       |       |                 |
|--|-------|-------|-----------------|
|  | 0.721 | 0.062 | TULP1           |
|  | 0.716 | 0.057 | <u>PLEK</u>     |
|  | 0.746 | 0.087 | <u>OBSCN</u>    |
|  | 0.723 | 0.064 | <u>OR7A10</u>   |
|  | 0.712 | 0.054 | <u>FAM46C</u>   |
|  | 0.732 | 0.074 | ANKRD34C        |
|  | 0.739 | 0.082 | <u>BARX1</u>    |
|  | 0.721 | 0.064 | <u>RBM3</u>     |
|  | 0.724 | 0.068 | ZNF214          |
|  | 0.727 | 0.071 | NDST3           |
|  | 0.725 | 0.069 | <u>TROVE2</u>   |
|  | 0.732 | 0.076 | ZNF701          |
|  | 0.727 | 0.071 | <u>PAX9</u>     |
|  | 0.734 | 0.078 | <u>HIST1H1A</u> |
|  | 0.738 | 0.083 | <u>CNOT2</u>    |
|  | 0.712 | 0.057 | <u>TLL3</u>     |
|  | 0.717 | 0.062 | ZNF80           |
|  | 0.717 | 0.062 | <u>HOXA2</u>    |
|  | 0.724 | 0.069 | <u>CNTN5</u>    |
|  | 0.736 | 0.081 | <u>CYSLTR2</u>  |
|  | 0.717 | 0.063 | <u>NR2C2</u>    |
|  | 0.710 | 0.056 | <u>SGCA</u>     |
|  | 0.730 | 0.076 | ZNF132          |
|  | 0.726 | 0.072 | <u>IL12RB1</u>  |
|  | 0.711 | 0.058 | <u>CSDA</u>     |
|  | 0.717 | 0.063 | <u>AGBL2</u>    |
|  | 0.729 | 0.076 | <u>FBXO4</u>    |
|  | 0.725 | 0.072 | <u>FGF23</u>    |
|  | 0.732 | 0.080 | C6ORF123        |
|  | 0.736 | 0.084 | <u>LY6G6E</u>   |
|  | 0.726 | 0.073 | <u>TLL1</u>     |
|  | 0.741 | 0.088 | <u>IFNA4</u>    |
|  | 0.729 | 0.077 | <u>SH2D3C</u>   |
|  | 0.712 | 0.059 | <u>BBS7</u>     |
|  | 0.723 | 0.071 | <u>SIK2</u>     |
|  | 0.724 | 0.072 | <u>TDRKH</u>    |
|  | 0.726 | 0.074 | <u>USH2A</u>    |
|  | 0.725 | 0.074 | RPA4            |
|  | 0.738 | 0.088 | <u>INE1</u>     |
|  | 0.720 | 0.069 | LALBA           |
|  | 0.729 | 0.079 | <u>EIF3F</u>    |
|  | 0.725 | 0.075 | OR7E87P         |
|  | 0.720 | 0.070 | <u>SCNN1A</u>   |
|  | 0.729 | 0.079 | <u>KCNC1</u>    |
|  | 0.728 | 0.079 | <u>ST8SIA3</u>  |
|  | 0.724 | 0.075 | <u>OBP2A</u>    |
|  | 0.724 | 0.075 | <u>GRK1</u>     |

|  |       |       |                   |
|--|-------|-------|-------------------|
|  | 0.734 | 0.086 | GPR85             |
|  | 0.714 | 0.066 | PCDH11X           |
|  | 0.721 | 0.073 | <u>PHLDB1</u>     |
|  | 0.724 | 0.076 | <u>HBEGF</u>      |
|  | 0.734 | 0.086 | <u>CHAT</u>       |
|  | 0.695 | 0.048 | <u>TRAT1</u>      |
|  | 0.717 | 0.070 | ACCN4             |
|  | 0.731 | 0.085 | <u>COL4A6</u>     |
|  | 0.716 | 0.070 | <u>PGLYRP1</u>    |
|  | 0.731 | 0.085 | <u>SCN8A</u>      |
|  | 0.733 | 0.087 | <u>ABCD2</u>      |
|  | 0.717 | 0.072 | <u>PRX</u>        |
|  | 0.703 | 0.057 | <u>SLC22A18AS</u> |
|  | 0.721 | 0.076 | <u>HAUS5</u>      |
|  | 0.723 | 0.078 | CRYGA             |
|  | 0.738 | 0.093 | GBX1              |
|  | 0.706 | 0.061 | PIWIL1            |
|  | 0.734 | 0.089 | <u>AGRP</u>       |
|  | 0.714 | 0.070 | <u>SOX1</u>       |
|  | 0.712 | 0.068 | <u>HLA-DRB4</u>   |
|  | 0.712 | 0.068 | <u>MSH4</u>       |
|  | 0.732 | 0.089 | <u>TGM4</u>       |
|  | 0.706 | 0.063 | <u>HOXB8</u>      |
|  | 0.711 | 0.068 | ANKRD7            |
|  | 0.714 | 0.071 | <u>CEACAM1</u>    |
|  | 0.706 | 0.063 | TPTE              |
|  | 0.721 | 0.079 | <u>SLC14A2</u>    |
|  | 0.699 | 0.058 | C6ORF103          |
|  | 0.729 | 0.088 | <u>STXBP5L</u>    |
|  | 0.731 | 0.091 | LINC00474         |
|  | 0.724 | 0.084 | <u>RALGPS1</u>    |
|  | 0.718 | 0.078 | <u>TMC7</u>       |
|  | 0.713 | 0.073 | <u>ATOH1</u>      |
|  | 0.719 | 0.079 | ASIP              |
|  | 0.710 | 0.070 | <u>TP73</u>       |
|  | 0.717 | 0.078 | <u>CADPS</u>      |
|  | 0.723 | 0.084 | <u>NTNG1</u>      |
|  | 0.720 | 0.081 | <u>FOXP2</u>      |
|  | 0.699 | 0.060 | <u>ELK3</u>       |
|  | 0.717 | 0.079 | <u>GJA5</u>       |
|  | 0.714 | 0.076 | NACA2             |
|  | 0.717 | 0.079 | ZNF674            |
|  | 0.707 | 0.069 | <u>FOXB1</u>      |
|  | 0.695 | 0.057 | <u>ASCL2</u>      |
|  | 0.692 | 0.055 | <u>EIF3M</u>      |
|  | 0.720 | 0.083 | <u>GUCY2C</u>     |
|  | 0.705 | 0.069 | <u>CCDC134</u>    |

|  |       |       |                     |
|--|-------|-------|---------------------|
|  | 0.718 | 0.082 | <u>RANBP1</u>       |
|  | 0.719 | 0.083 | <u>AGRN</u>         |
|  | 0.736 | 0.101 | <u>PCDHB8</u>       |
|  | 0.721 | 0.086 | <u>AMELY</u>        |
|  | 0.721 | 0.086 | <u>PARK2</u>        |
|  | 0.722 | 0.087 | <u>PLEKHH3</u>      |
|  | 0.721 | 0.086 | <u>IQCA1</u>        |
|  | 0.722 | 0.088 | <u>CDH15</u>        |
|  | 0.715 | 0.082 | <u>KIAA1967</u>     |
|  | 0.707 | 0.073 | <u>GRIN2D</u>       |
|  | 0.720 | 0.086 | <u>HNMT</u>         |
|  | 0.710 | 0.076 | <u>CRTC1</u>        |
|  | 0.693 | 0.061 | <u>C9ORF68</u>      |
|  | 0.721 | 0.089 | <u>NLGN4Y</u>       |
|  | 0.696 | 0.064 | <u>WDR96</u>        |
|  | 0.697 | 0.066 | <u>AMPD3</u>        |
|  | 0.707 | 0.075 | <u>RPS28</u>        |
|  | 0.708 | 0.076 | <u>RAB40A</u>       |
|  | 0.697 | 0.065 | <u>IGFBP7</u>       |
|  | 0.718 | 0.087 | <u>OR11A1</u>       |
|  | 0.705 | 0.074 | <u>GUCY2D</u>       |
|  | 0.710 | 0.079 | <u>KDM4C</u>        |
|  | 0.692 | 0.062 | <u>LPHN3</u>        |
|  | 0.697 | 0.068 | <u>CXCL3</u>        |
|  | 0.700 | 0.070 | <u>MARCH6</u>       |
|  | 0.714 | 0.084 | <u>DAB1</u>         |
|  | 0.703 | 0.074 | <u>HIST1H4F</u>     |
|  | 0.712 | 0.084 | <u>PBOV1</u>        |
|  | 0.720 | 0.093 | <u>BRDT</u>         |
|  | 0.724 | 0.097 | <u>PRG3</u>         |
|  | 0.707 | 0.080 | <u>GRID2</u>        |
|  | 0.680 | 0.054 | <u>DCAF13</u>       |
|  | 0.710 | 0.083 | <u>ERCC4</u>        |
|  | 0.707 | 0.081 | <u>LOC100505960</u> |
|  | 0.710 | 0.085 | <u>CSF2</u>         |
|  | 0.711 | 0.086 | <u>PEX16</u>        |
|  | 0.709 | 0.083 | <u>FBN1</u>         |
|  | 0.705 | 0.080 | <u>GLI1</u>         |
|  | 0.694 | 0.069 | <u>MGAT4C</u>       |
|  | 0.706 | 0.082 | <u>C14ORF56</u>     |
|  | 0.699 | 0.075 | <u>EDDM3A</u>       |
|  | 0.681 | 0.056 | <u>MXD1</u>         |
|  | 0.725 | 0.101 | <u>C19ORF50</u>     |
|  | 0.695 | 0.071 | <u>LCMT2</u>        |
|  | 0.704 | 0.080 | <u>ATP8A2</u>       |
|  | 0.726 | 0.102 | <u>PREX2</u>        |
|  | 0.695 | 0.071 | <u>GTF2A1</u>       |

|  |       |       |                     |
|--|-------|-------|---------------------|
|  | 0.707 | 0.084 | <u>TRMT1</u>        |
|  | 0.715 | 0.092 | <u>LRRC41</u>       |
|  | 0.710 | 0.087 | <u>NPHP1</u>        |
|  | 0.707 | 0.085 | <u>SLC8A1</u>       |
|  | 0.723 | 0.101 | <u>PNMA2</u>        |
|  | 0.720 | 0.099 | <u>IFNW1</u>        |
|  | 0.712 | 0.091 | <u>KLF15</u>        |
|  | 0.701 | 0.080 | <u>C16ORF71</u>     |
|  | 0.706 | 0.086 | <u>PTCH2</u>        |
|  | 0.718 | 0.098 | <u>MBL1P</u>        |
|  | 0.700 | 0.080 | <u>CDH9</u>         |
|  | 0.697 | 0.077 | <u>ZBTB7B</u>       |
|  | 0.698 | 0.079 | <u>GLS</u>          |
|  | 0.695 | 0.076 | <u>FSTL4</u>        |
|  | 0.693 | 0.074 | <u>PHEX</u>         |
|  | 0.702 | 0.083 | <u>RGS11</u>        |
|  | 0.677 | 0.058 | <u>ARHGAP33</u>     |
|  | 0.685 | 0.067 | <u>LNPEP</u>        |
|  | 0.682 | 0.063 | <u>ZBTB7C</u>       |
|  | 0.717 | 0.098 | <u>FAM125B</u>      |
|  | 0.711 | 0.093 | <u>SH2D2A</u>       |
|  | 0.709 | 0.091 | <u>MTSS1</u>        |
|  | 0.696 | 0.078 | <u>IGKV1-5</u>      |
|  | 0.694 | 0.077 | <u>OBFC2A</u>       |
|  | 0.700 | 0.083 | <u>AREG</u>         |
|  | 0.693 | 0.077 | <u>ZBTB32</u>       |
|  | 0.691 | 0.074 | <u>WDHD1</u>        |
|  | 0.672 | 0.056 | <u>GNRH1</u>        |
|  | 0.688 | 0.072 | <u>KLHL28</u>       |
|  | 0.710 | 0.094 | <u>NUP205</u>       |
|  | 0.698 | 0.082 | <u>OR2F2</u>        |
|  | 0.704 | 0.089 | <u>ZNF467</u>       |
|  | 0.695 | 0.080 | <u>NYX</u>          |
|  | 0.692 | 0.077 | <u>CHD4</u>         |
|  | 0.704 | 0.090 | <u>NUP88</u>        |
|  | 0.706 | 0.091 | <u>ZNF259P1</u>     |
|  | 0.691 | 0.076 | <u>GIP</u>          |
|  | 0.680 | 0.066 | <u>IGLV6-57</u>     |
|  | 0.686 | 0.072 | <u>MGC13053</u>     |
|  | 0.694 | 0.081 | <u>LOC100130354</u> |
|  | 0.687 | 0.074 | <u>ASB4</u>         |
|  | 0.692 | 0.079 | <u>FOXD2</u>        |
|  | 0.698 | 0.086 | <u>ADAM30</u>       |
|  | 0.711 | 0.099 | <u>TBX10</u>        |
|  | 0.695 | 0.084 | <u>DRD5</u>         |
|  | 0.699 | 0.088 | <u>SLC25A30</u>     |
|  | 0.693 | 0.082 | <u>THAP9</u>        |

|  |       |       |                  |
|--|-------|-------|------------------|
|  | 0.685 | 0.075 | <u>CKAP4</u>     |
|  | 0.699 | 0.089 | <u>CSDC2</u>     |
|  | 0.691 | 0.082 | <u>TTC38</u>     |
|  | 0.656 | 0.047 | <u>TXNL1</u>     |
|  | 0.656 | 0.047 | <u>NID2</u>      |
|  | 0.688 | 0.079 | CLUL1            |
|  | 0.691 | 0.083 | <u>CSPG4</u>     |
|  | 0.694 | 0.085 | <u>MYH13</u>     |
|  | 0.680 | 0.072 | <u>MYB</u>       |
|  | 0.681 | 0.074 | <u>SLC25A16</u>  |
|  | 0.704 | 0.097 | MYO15A           |
|  | 0.691 | 0.084 | <u>TRPM2</u>     |
|  | 0.684 | 0.077 | <u>NR2E1</u>     |
|  | 0.687 | 0.080 | <u>IFNA10</u>    |
|  | 0.642 | 0.036 | <u>LCN2</u>      |
|  | 0.664 | 0.058 | <u>TPR</u>       |
|  | 0.715 | 0.110 | <u>SOX30</u>     |
|  | 0.699 | 0.094 | <u>SSTR4</u>     |
|  | 0.695 | 0.091 | <u>CDADC1</u>    |
|  | 0.701 | 0.097 | <u>GUCY1B2</u>   |
|  | 0.699 | 0.095 | <u>ADAM7</u>     |
|  | 0.686 | 0.082 | LOC100127886     |
|  | 0.679 | 0.075 | <u>EIF5B</u>     |
|  | 0.690 | 0.087 | <u>HNRNPA3P1</u> |
|  | 0.681 | 0.078 | CATR1            |
|  | 0.684 | 0.081 | MGC2889          |
|  | 0.694 | 0.091 | <u>PRSS53</u>    |
|  | 0.694 | 0.092 | <u>NOD1</u>      |
|  | 0.684 | 0.082 | <u>PDE6C</u>     |
|  | 0.685 | 0.083 | <u>RAVER2</u>    |
|  | 0.683 | 0.081 | TRBC2            |
|  | 0.698 | 0.096 | <u>BAIAP2</u>    |
|  | 0.690 | 0.088 | <u>KIR3DX1</u>   |
|  | 0.686 | 0.085 | <u>CHD2</u>      |
|  | 0.688 | 0.088 | <u>ZBTB33</u>    |
|  | 0.678 | 0.079 | LINC00230A       |
|  | 0.692 | 0.093 | <u>KRTAP5-8</u>  |
|  | 0.701 | 0.101 | <u>KCNA1</u>     |
|  | 0.671 | 0.071 | RPS2P45          |
|  | 0.680 | 0.081 | <u>ZFY</u>       |
|  | 0.694 | 0.094 | <u>GFM1</u>      |
|  | 0.707 | 0.108 | <u>NMBR</u>      |
|  | 0.700 | 0.101 | <u>FGF8</u>      |
|  | 0.692 | 0.094 | <u>IL4</u>       |
|  | 0.690 | 0.093 | RAB40AL          |
|  | 0.668 | 0.071 | <u>RARS2</u>     |
|  | 0.697 | 0.100 | <u>IFNA14</u>    |

|  |       |       |                 |
|--|-------|-------|-----------------|
|  | 0.688 | 0.092 | <u>TAF13</u>    |
|  | 0.679 | 0.083 | PCDHB17         |
|  | 0.688 | 0.092 | ZNF749          |
|  | 0.680 | 0.085 | <u>ADARB2</u>   |
|  | 0.645 | 0.050 | <u>CCND2</u>    |
|  | 0.689 | 0.095 | <u>ADAM3A</u>   |
|  | 0.691 | 0.096 | <u>PCCA</u>     |
|  | 0.681 | 0.086 | <u>RFX1</u>     |
|  | 0.685 | 0.091 | <u>ADCY9</u>    |
|  | 0.675 | 0.081 | <u>PYHIN1</u>   |
|  | 0.684 | 0.090 | MORC1           |
|  | 0.685 | 0.092 | <u>TRPC7</u>    |
|  | 0.666 | 0.072 | <u>FER</u>      |
|  | 0.669 | 0.075 | <u>TMF1</u>     |
|  | 0.691 | 0.099 | <u>ULBP1</u>    |
|  | 0.692 | 0.100 | SEC14L5         |
|  | 0.676 | 0.084 | LRRC3           |
|  | 0.679 | 0.087 | <u>GPR4</u>     |
|  | 0.689 | 0.097 | <u>GMIP</u>     |
|  | 0.673 | 0.082 | ACSBG2          |
|  | 0.684 | 0.094 | <u>TIMM8A</u>   |
|  | 0.655 | 0.065 | <u>DNMT3A</u>   |
|  | 0.669 | 0.078 | <u>PRDM5</u>    |
|  | 0.693 | 0.103 | CETN1           |
|  | 0.672 | 0.082 | <u>SETD2</u>    |
|  | 0.686 | 0.096 | <u>PRAMEF11</u> |
|  | 0.671 | 0.081 | PRPH2           |
|  | 0.697 | 0.107 | <u>RAB40C</u>   |
|  | 0.675 | 0.085 | <u>IDI2-AS1</u> |
|  | 0.668 | 0.078 | <u>LRP5L</u>    |
|  | 0.668 | 0.079 | <u>DUOX1</u>    |
|  | 0.680 | 0.091 | <u>CCDC82</u>   |
|  | 0.668 | 0.078 | SYCE1L          |
|  | 0.690 | 0.100 | <u>ZC3H13</u>   |
|  | 0.679 | 0.090 | CHD5            |
|  | 0.678 | 0.089 | <u>CNOT3</u>    |
|  | 0.666 | 0.077 | <u>NPAS3</u>    |
|  | 0.679 | 0.091 | <u>CPLX2</u>    |
|  | 0.691 | 0.103 | <u>PNLIPRP1</u> |
|  | 0.670 | 0.083 | <u>NPY6R</u>    |
|  | 0.672 | 0.085 | <u>ATF7IP</u>   |
|  | 0.691 | 0.104 | <u>IL3</u>      |
|  | 0.647 | 0.060 | <u>DYM</u>      |
|  | 0.670 | 0.083 | <u>BCL3</u>     |
|  | 0.674 | 0.087 | TPSD1           |
|  | 0.679 | 0.092 | IFNA6           |
|  | 0.679 | 0.093 | <u>EDA2R</u>    |

|  |       |       |                |
|--|-------|-------|----------------|
|  | 0.669 | 0.083 | <u>RSG1</u>    |
|  | 0.686 | 0.100 | <u>TEC</u>     |
|  | 0.653 | 0.067 | <u>GABRA6</u>  |
|  | 0.689 | 0.104 | <u>ACSBG1</u>  |
|  | 0.674 | 0.089 | <u>RLBP1</u>   |
|  | 0.664 | 0.079 | <u>SUV39H2</u> |
|  | 0.667 | 0.082 | <u>OR1D2</u>   |
|  | 0.675 | 0.090 | ANKRD36BP2     |
|  | 0.674 | 0.089 | <u>CCNT2</u>   |
|  | 0.671 | 0.087 | <u>PKD2L2</u>  |
|  | 0.684 | 0.099 | <u>DLG2</u>    |
|  | 0.679 | 0.095 | <u>PTGDR</u>   |
|  | 0.676 | 0.092 | <u>ABCD1</u>   |
|  | 0.656 | 0.073 | <u>QSER1</u>   |
|  | 0.679 | 0.096 | <u>TCF20</u>   |
|  | 0.671 | 0.088 | ZNF355P        |
|  | 0.654 | 0.071 | ZNF471         |
|  | 0.669 | 0.086 | <u>WDR59</u>   |
|  | 0.686 | 0.104 | <u>MTUS2</u>   |
|  | 0.676 | 0.095 | MS4A5          |
|  | 0.670 | 0.090 | <u>IFNA8</u>   |
|  | 0.676 | 0.095 | CLCA3P         |
|  | 0.678 | 0.098 | <u>FBXO24</u>  |
|  | 0.678 | 0.099 | <u>TMEM144</u> |
|  | 0.665 | 0.086 | <u>PHC3</u>    |
|  | 0.666 | 0.088 | <u>GARNL3</u>  |
|  | 0.680 | 0.102 | <u>C16ORF3</u> |
|  | 0.688 | 0.110 | <u>IL9</u>     |
|  | 0.671 | 0.094 | <u>TTY2</u>    |
|  | 0.674 | 0.097 | <u>ACR</u>     |
|  | 0.682 | 0.105 | <u>OR2C1</u>   |
|  | 0.677 | 0.101 | <u>OR1F2P</u>  |
|  | 0.653 | 0.077 | <u>NDST1</u>   |
|  | 0.675 | 0.100 | <u>CDS1</u>    |
|  | 0.651 | 0.076 | <u>ALPI</u>    |
|  | 0.677 | 0.103 | ZNF835         |
|  | 0.681 | 0.107 | <u>SMAD4</u>   |
|  | 0.672 | 0.099 | <u>KRT35</u>   |
|  | 0.657 | 0.084 | LOC100129973   |
|  | 0.677 | 0.104 | <u>F2RL3</u>   |
|  | 0.653 | 0.080 | ZNF480         |
|  | 0.671 | 0.099 | SOX14          |
|  | 0.664 | 0.094 | <u>ATP2B3</u>  |
|  | 0.672 | 0.102 | <u>PRR5</u>    |
|  | 0.676 | 0.106 | KCNJ9          |
|  | 0.679 | 0.110 | <u>CCZ1</u>    |
|  | 0.674 | 0.105 | <u>PRND</u>    |

|  |       |       |                  |
|--|-------|-------|------------------|
|  | 0.670 | 0.102 | <u>GAP43</u>     |
|  | 0.665 | 0.097 | <u>EHMT1</u>     |
|  | 0.661 | 0.094 | <u>ATP10B</u>    |
|  | 0.667 | 0.099 | <u>EPHB1</u>     |
|  | 0.640 | 0.073 | <u>THOC5</u>     |
|  | 0.655 | 0.088 | <u>ANAPC13</u>   |
|  | 0.655 | 0.089 | <u>FAM182A</u>   |
|  | 0.656 | 0.090 | <u>SERPINB7</u>  |
|  | 0.654 | 0.089 | <u>TEX12</u>     |
|  | 0.672 | 0.107 | <u>GCNT2</u>     |
|  | 0.659 | 0.094 | <u>PDPN</u>      |
|  | 0.673 | 0.109 | <u>GAL</u>       |
|  | 0.652 | 0.087 | <u>C6ORF25</u>   |
|  | 0.650 | 0.086 | <u>C8ORF71</u>   |
|  | 0.659 | 0.095 | <u>BFSP2</u>     |
|  | 0.637 | 0.074 | <u>ANK1</u>      |
|  | 0.650 | 0.086 | <u>CSRNP3</u>    |
|  | 0.664 | 0.101 | <u>SYT12</u>     |
|  | 0.665 | 0.102 | <u>SEC14L3</u>   |
|  | 0.652 | 0.089 | <u>GALR2</u>     |
|  | 0.646 | 0.084 | <u>SOX21</u>     |
|  | 0.660 | 0.098 | <u>CDY1</u>      |
|  | 0.661 | 0.101 | <u>HOXD1</u>     |
|  | 0.673 | 0.112 | <u>KRTAP4-7</u>  |
|  | 0.659 | 0.099 | <u>XRCC6</u>     |
|  | 0.657 | 0.098 | <u>SPICE1</u>    |
|  | 0.642 | 0.084 | <u>TADA2A</u>    |
|  | 0.645 | 0.086 | <u>FARS2</u>     |
|  | 0.659 | 0.102 | <u>KRTAP1-3</u>  |
|  | 0.662 | 0.104 | <u>B3GALT5</u>   |
|  | 0.653 | 0.095 | <u>RFPL1-AS1</u> |
|  | 0.665 | 0.108 | <u>TAS2R16</u>   |
|  | 0.671 | 0.114 | <u>ZBED4</u>     |
|  | 0.653 | 0.097 | <u>DOPEY1</u>    |
|  | 0.647 | 0.090 | <u>SIGLEC8</u>   |
|  | 0.655 | 0.099 | <u>SRRM2</u>     |
|  | 0.637 | 0.082 | <u>CSNK2A1</u>   |
|  | 0.648 | 0.093 | <u>HIPK2</u>     |
|  | 0.648 | 0.094 | <u>ZPBP</u>      |
|  | 0.649 | 0.094 | <u>IFNA2</u>     |
|  | 0.658 | 0.103 | <u>KANK2</u>     |
|  | 0.629 | 0.075 | <u>CYP19A1</u>   |
|  | 0.638 | 0.084 | <u>TREH</u>      |
|  | 0.659 | 0.105 | <u>CHRNA2</u>    |
|  | 0.655 | 0.101 | <u>CDON</u>      |
|  | 0.655 | 0.102 | <u>CTAGE1</u>    |
|  | 0.647 | 0.094 | <u>OLAH</u>      |

|  |       |       |                 |
|--|-------|-------|-----------------|
|  | 0.661 | 0.109 | ZSCAN12         |
|  | 0.664 | 0.112 | <u>SHOX2</u>    |
|  | 0.651 | 0.099 | <u>GLRA1</u>    |
|  | 0.645 | 0.093 | <u>PLIN2</u>    |
|  | 0.653 | 0.102 | <u>CAMK4</u>    |
|  | 0.660 | 0.109 | <u>EPHA1</u>    |
|  | 0.667 | 0.115 | <u>FNTB</u>     |
|  | 0.661 | 0.110 | NSUN7           |
|  | 0.637 | 0.086 | <u>RAB30</u>    |
|  | 0.651 | 0.100 | <u>MLN</u>      |
|  | 0.646 | 0.095 | <u>VCPIP1</u>   |
|  | 0.653 | 0.103 | ZXDB            |
|  | 0.660 | 0.110 | <u>HYDIN</u>    |
|  | 0.649 | 0.099 | <u>RNF24</u>    |
|  | 0.663 | 0.113 | <u>OR1E1</u>    |
|  | 0.654 | 0.104 | <u>CYP2B6</u>   |
|  | 0.629 | 0.080 | <u>KIAA0196</u> |
|  | 0.662 | 0.114 | GPR172B         |
|  | 0.653 | 0.105 | <u>POU2F3</u>   |
|  | 0.651 | 0.103 | <u>RASSF4</u>   |
|  | 0.645 | 0.098 | TCEB3B          |
|  | 0.646 | 0.099 | <u>C16ORF70</u> |
|  | 0.641 | 0.094 | <u>SCRT1</u>    |
|  | 0.655 | 0.108 | <u>MTNR1A</u>   |
|  | 0.654 | 0.108 | PPP1R2P9        |
|  | 0.650 | 0.105 | <u>FBXO41</u>   |
|  | 0.635 | 0.089 | HEATR8          |
|  | 0.635 | 0.089 | <u>PLA2R1</u>   |
|  | 0.631 | 0.086 | <u>CDKL2</u>    |
|  | 0.651 | 0.106 | <u>MINK1</u>    |
|  | 0.657 | 0.112 | LOC100093698    |
|  | 0.637 | 0.093 | <u>CHRNA4</u>   |
|  | 0.646 | 0.102 | <u>IMPG1</u>    |
|  | 0.644 | 0.100 | <u>S1PR2</u>    |
|  | 0.646 | 0.102 | <u>ERC1</u>     |
|  | 0.659 | 0.115 | <u>OR2W1</u>    |
|  | 0.649 | 0.105 | <u>POU3F4</u>   |
|  | 0.648 | 0.104 | <u>SERPINA9</u> |
|  | 0.649 | 0.105 | GSC2            |
|  | 0.666 | 0.123 | <u>IL11</u>     |
|  | 0.634 | 0.092 | <u>KRT31</u>    |
|  | 0.643 | 0.100 | <u>PRKAB1</u>   |
|  | 0.656 | 0.114 | LOC100131825    |
|  | 0.631 | 0.090 | <u>SLC4A10</u>  |
|  | 0.629 | 0.088 | <u>PDK3</u>     |
|  | 0.646 | 0.105 | <u>SLC2A4</u>   |
|  | 0.650 | 0.109 | FOXO3           |

|  |       |       |                     |
|--|-------|-------|---------------------|
|  | 0.636 | 0.095 | <u>POU2F2</u>       |
|  | 0.641 | 0.100 | <u>CTDSPL</u>       |
|  | 0.639 | 0.098 | <u>PCLO</u>         |
|  | 0.632 | 0.092 | <u>PTGIS</u>        |
|  | 0.625 | 0.085 | <u>TMX4</u>         |
|  | 0.644 | 0.104 | <u>FAM13C</u>       |
|  | 0.648 | 0.108 | <u>FAM49B</u>       |
|  | 0.649 | 0.109 | <u>VAV2</u>         |
|  | 0.662 | 0.123 | <u>P2RY4</u>        |
|  | 0.639 | 0.100 | <u>CRYBA1</u>       |
|  | 0.638 | 0.099 | <u>KIAA0087</u>     |
|  | 0.641 | 0.102 | <u>KCNH1</u>        |
|  | 0.652 | 0.113 | <u>LPAR4</u>        |
|  | 0.642 | 0.104 | <u>AKT3</u>         |
|  | 0.645 | 0.106 | <u>GJB4</u>         |
|  | 0.626 | 0.088 | <u>MAP3K9</u>       |
|  | 0.641 | 0.103 | <u>PRM2</u>         |
|  | 0.638 | 0.100 | <u>PIGC</u>         |
|  | 0.631 | 0.093 | <u>IKZF2</u>        |
|  | 0.646 | 0.109 | <u>LGALS13</u>      |
|  | 0.650 | 0.114 | <u>LOC100128640</u> |
|  | 0.641 | 0.105 | <u>STAMBPL1</u>     |
|  | 0.653 | 0.118 | <u>IFNA7</u>        |
|  | 0.641 | 0.106 | <u>HSDL2</u>        |
|  | 0.640 | 0.105 | <u>NOX3</u>         |
|  | 0.654 | 0.121 | <u>MTMR10</u>       |
|  | 0.642 | 0.109 | <u>CCDC40</u>       |
|  | 0.647 | 0.114 | <u>NR4A1</u>        |
|  | 0.631 | 0.098 | <u>WWTR1</u>        |
|  | 0.619 | 0.086 | <u>OTUD4</u>        |
|  | 0.626 | 0.093 | <u>C22ORF31</u>     |
|  | 0.640 | 0.108 | <u>CMA1</u>         |
|  | 0.634 | 0.101 | <u>ILF3</u>         |
|  | 0.636 | 0.104 | <u>PAPOLB</u>       |
|  | 0.617 | 0.085 | <u>CCDC70</u>       |
|  | 0.631 | 0.099 | <u>FN3K</u>         |
|  | 0.632 | 0.101 | <u>MCF2L</u>        |
|  | 0.615 | 0.084 | <u>GFRA3</u>        |
|  | 0.635 | 0.104 | <u>PBX2</u>         |
|  | 0.635 | 0.104 | <u>TGM5</u>         |
|  | 0.651 | 0.120 | <u>SEPT4</u>        |
|  | 0.630 | 0.100 | <u>GREB1</u>        |
|  | 0.659 | 0.129 | <u>INTS1</u>        |
|  | 0.619 | 0.089 | <u>HMGA2</u>        |
|  | 0.614 | 0.084 | <u>SLC1A3</u>       |
|  | 0.626 | 0.096 | <u>CCNK</u>         |
|  | 0.633 | 0.104 | <u>ELK1</u>         |

|  |       |       |                  |
|--|-------|-------|------------------|
|  | 0.642 | 0.113 | <u>NCR1</u>      |
|  | 0.632 | 0.103 | <u>KCNJ3</u>     |
|  | 0.642 | 0.113 | <u>PCDHGB6</u>   |
|  | 0.632 | 0.103 | <u>CRYGB</u>     |
|  | 0.634 | 0.106 | <u>MTL5</u>      |
|  | 0.650 | 0.122 | <u>HOXD9</u>     |
|  | 0.645 | 0.118 | <u>LMAN2</u>     |
|  | 0.633 | 0.106 | <u>SLC39A2</u>   |
|  | 0.639 | 0.112 | <u>COLEC10</u>   |
|  | 0.621 | 0.096 | <u>OR10H2</u>    |
|  | 0.597 | 0.072 | <u>TMOD2</u>     |
|  | 0.643 | 0.118 | <u>OR1A2</u>     |
|  | 0.632 | 0.108 | <u>ZNF550</u>    |
|  | 0.626 | 0.102 | <u>IFNA5</u>     |
|  | 0.638 | 0.113 | <u>RAB11FIP3</u> |
|  | 0.626 | 0.103 | <u>C11ORF1</u>   |
|  | 0.632 | 0.109 | <u>ARMC9</u>     |
|  | 0.643 | 0.120 | <u>TFPI</u>      |
|  | 0.622 | 0.099 | <u>VPS13B</u>    |
|  | 0.633 | 0.111 | <u>OR2J3</u>     |
|  | 0.630 | 0.110 | <u>EXOG</u>      |
|  | 0.637 | 0.117 | <u>CALCR</u>     |
|  | 0.629 | 0.109 | <u>LIPE</u>      |
|  | 0.634 | 0.115 | <u>CCT8L2</u>    |
|  | 0.636 | 0.117 | <u>IFNA17</u>    |
|  | 0.629 | 0.110 | <u>MTNR1B</u>    |
|  | 0.627 | 0.108 | <u>TRPC5</u>     |
|  | 0.623 | 0.105 | <u>RTDR1</u>     |
|  | 0.634 | 0.115 | <u>HRH3</u>      |
|  | 0.585 | 0.067 | <u>RAB21</u>     |
|  | 0.618 | 0.099 | <u>OR10C1</u>    |
|  | 0.620 | 0.102 | <u>DPY19L1</u>   |
|  | 0.625 | 0.108 | <u>DPYSL4</u>    |
|  | 0.619 | 0.102 | <u>FAM75C2</u>   |
|  | 0.630 | 0.114 | <u>WNT2B</u>     |
|  | 0.620 | 0.104 | <u>CNR2</u>      |
|  | 0.619 | 0.103 | <u>NCBP1</u>     |
|  | 0.618 | 0.102 | <u>FGF6</u>      |
|  | 0.613 | 0.097 | <u>UPF1</u>      |
|  | 0.620 | 0.104 | <u>POU3F1</u>    |
|  | 0.632 | 0.117 | <u>ST3GAL4</u>   |
|  | 0.635 | 0.120 | <u>CRYBA4</u>    |
|  | 0.631 | 0.117 | <u>ANKS1B</u>    |
|  | 0.614 | 0.100 | <u>CABYR</u>     |
|  | 0.636 | 0.121 | <u>IL1R1</u>     |
|  | 0.623 | 0.108 | <u>SPRY4</u>     |
|  | 0.617 | 0.102 | <u>OTUD7B</u>    |

|  |       |       |                    |
|--|-------|-------|--------------------|
|  | 0.620 | 0.106 | <u>C10ORF137</u>   |
|  | 0.623 | 0.110 | <u>PRPS1L1</u>     |
|  | 0.618 | 0.105 | LOC100507284       |
|  | 0.621 | 0.108 | <u>YES1</u>        |
|  | 0.614 | 0.102 | <u>EXPH5</u>       |
|  | 0.632 | 0.120 | <u>EZR</u>         |
|  | 0.627 | 0.115 | <u>CBX2</u>        |
|  | 0.619 | 0.108 | GPR31              |
|  | 0.625 | 0.114 | C8ORF39            |
|  | 0.613 | 0.103 | <u>TFAP2B</u>      |
|  | 0.614 | 0.104 | OR2J2              |
|  | 0.634 | 0.124 | <u>RGS1</u>        |
|  | 0.624 | 0.115 | <u>GOLGA6A</u>     |
|  | 0.621 | 0.113 | <u>IL26</u>        |
|  | 0.620 | 0.112 | LOC100131298       |
|  | 0.611 | 0.103 | EPS15L1            |
|  | 0.622 | 0.115 | <u>GART</u>        |
|  | 0.628 | 0.121 | <u>GSPT1</u>       |
|  | 0.614 | 0.106 | <u>KIDINS220</u>   |
|  | 0.630 | 0.123 | PMFBP1             |
|  | 0.626 | 0.119 | <u>LSS</u>         |
|  | 0.627 | 0.120 | <u>GSK3A</u>       |
|  | 0.613 | 0.107 | SYT2               |
|  | 0.612 | 0.107 | <u>NAG18</u>       |
|  | 0.607 | 0.102 | <u>RAX</u>         |
|  | 0.621 | 0.116 | <u>GJA9</u>        |
|  | 0.621 | 0.115 | <u>TAS2R14</u>     |
|  | 0.625 | 0.120 | MAGEC3             |
|  | 0.624 | 0.119 | <u>MYOF</u>        |
|  | 0.623 | 0.119 | <u>CD80</u>        |
|  | 0.619 | 0.115 | <u>OR2H1</u>       |
|  | 0.615 | 0.111 | DKFZP686O1327      |
|  | 0.625 | 0.120 | <u>KISS1</u>       |
|  | 0.605 | 0.101 | <u>AKIRIN2-AS1</u> |
|  | 0.613 | 0.109 | <u>AURKA</u>       |
|  | 0.612 | 0.109 | <u>PARVB</u>       |
|  | 0.607 | 0.104 | <u>TNFRSF10D</u>   |
|  | 0.613 | 0.109 | <u>B4GALT6</u>     |
|  | 0.630 | 0.126 | <u>ILVBL</u>       |
|  | 0.611 | 0.108 | <u>PTPRN2</u>      |
|  | 0.629 | 0.126 | C7ORF69            |
|  | 0.614 | 0.113 | <u>SHH</u>         |
|  | 0.622 | 0.120 | <u>LILRP2</u>      |
|  | 0.624 | 0.122 | <u>ADAM18</u>      |
|  | 0.605 | 0.104 | <u>CNGA3</u>       |
|  | 0.617 | 0.116 | <u>DGCR2</u>       |
|  | 0.612 | 0.111 | <u>MAPK8IP1</u>    |

|       |       |                 |
|-------|-------|-----------------|
| 0.610 | 0.109 | IGHV5-78        |
| 0.621 | 0.120 | <u>COL19A1</u>  |
| 0.623 | 0.123 | <u>OR7A17</u>   |
| 0.618 | 0.118 | <u>DUS2L</u>    |
| 0.601 | 0.101 | <u>PHF20L1</u>  |
| 0.631 | 0.131 | <u>GPR50</u>    |
| 0.619 | 0.119 | <u>ORC5</u>     |
| 0.619 | 0.120 | <u>SIVA1</u>    |
| 0.583 | 0.084 | <u>CASP3</u>    |
| 0.602 | 0.103 | <u>SLC35F5</u>  |
| 0.617 | 0.120 | <u>MED6</u>     |
| 0.618 | 0.120 | LRRC37BP1       |
| 0.614 | 0.117 | <u>PQLC3</u>    |
| 0.612 | 0.115 | <u>DDX4</u>     |
| 0.609 | 0.113 | PCDHA3          |
| 0.628 | 0.132 | <u>SPAG8</u>    |
| 0.623 | 0.127 | <u>KIAA0509</u> |
| 0.619 | 0.124 | WSCD2           |
| 0.616 | 0.121 | <u>ABCC6</u>    |
| 0.613 | 0.118 | <u>ICA1</u>     |
| 0.607 | 0.113 | <u>PPEF2</u>    |
| 0.610 | 0.117 | BTN2A3P         |
| 0.600 | 0.107 | <u>RIMS2</u>    |
| 0.592 | 0.098 | <u>COL1A2</u>   |
| 0.608 | 0.115 | <u>AANAT</u>    |
| 0.598 | 0.105 | <u>MPP2</u>     |
| 0.610 | 0.118 | <u>LAMA2</u>    |
| 0.611 | 0.119 | <u>MOS</u>      |
| 0.622 | 0.130 | <u>NCR3</u>     |
| 0.613 | 0.122 | <u>KDSR</u>     |
| 0.607 | 0.115 | <u>CASR</u>     |
| 0.616 | 0.125 | <u>MAF</u>      |
| 0.619 | 0.128 | <u>IFT27</u>    |
| 0.603 | 0.113 | <u>MKRN2</u>    |
| 0.621 | 0.131 | <u>SLC12A5</u>  |
| 0.601 | 0.113 | <u>LRRC23</u>   |
| 0.609 | 0.121 | <u>CNTLN</u>    |
| 0.602 | 0.114 | <u>ADAM8</u>    |
| 0.604 | 0.116 | <u>ADCK4</u>    |
| 0.606 | 0.119 | <u>TNNI3K</u>   |
| 0.594 | 0.107 | <u>XCR1</u>     |
| 0.600 | 0.113 | <u>GRIK5</u>    |
| 0.615 | 0.128 | <u>SPN</u>      |
| 0.618 | 0.132 | LOC100130331    |
| 0.588 | 0.101 | <u>RCHY1</u>    |
| 0.602 | 0.116 | ZNF549          |
| 0.599 | 0.113 | <u>TOP3B</u>    |

|  |       |       |                |
|--|-------|-------|----------------|
|  | 0.609 | 0.124 | CER1           |
|  | 0.603 | 0.118 | <u>PLAG1</u>   |
|  | 0.596 | 0.111 | <u>PPIAL4A</u> |
|  | 0.613 | 0.128 | <u>ADRA1B</u>  |
|  | 0.613 | 0.128 | <u>ACTR2</u>   |
|  | 0.595 | 0.110 | CRISP1         |
|  | 0.606 | 0.122 | TEX13A         |
|  | 0.617 | 0.134 | <u>OSM</u>     |
|  | 0.607 | 0.123 | <u>TAS2R13</u> |
|  | 0.612 | 0.129 | <u>RASAL2</u>  |
|  | 0.619 | 0.136 | <u>MYO15B</u>  |
|  | 0.598 | 0.115 | <u>PDE3A</u>   |
|  | 0.613 | 0.130 | <u>DOPEY2</u>  |
|  | 0.609 | 0.127 | ZNF221         |
|  | 0.614 | 0.132 | <u>AMOT</u>    |
|  | 0.606 | 0.124 | <u>ARFRP1</u>  |
|  | 0.608 | 0.126 | CG030          |
|  | 0.607 | 0.125 | <u>POFUT1</u>  |
|  | 0.603 | 0.121 | <u>CHRNA6</u>  |
|  | 0.613 | 0.132 | <u>SCUBE3</u>  |
|  | 0.607 | 0.127 | <u>F12</u>     |
|  | 0.594 | 0.114 | <u>HTR2A</u>   |
|  | 0.609 | 0.130 | <u>SNTG2</u>   |
|  | 0.598 | 0.118 | <u>HBP1</u>    |
|  | 0.614 | 0.135 | <u>CHRM5</u>   |
|  | 0.620 | 0.141 | OR7E19P        |
|  | 0.586 | 0.108 | <u>MEOX2</u>   |
|  | 0.601 | 0.125 | <u>ETV3</u>    |
|  | 0.602 | 0.125 | <u>ZBTB44</u>  |
|  | 0.603 | 0.128 | <u>HCG4B</u>   |
|  | 0.581 | 0.105 | <u>CSN3</u>    |
|  | 0.596 | 0.121 | TXNDC3         |
|  | 0.580 | 0.104 | <u>YIF1B</u>   |
|  | 0.594 | 0.119 | <u>EPM2A</u>   |
|  | 0.601 | 0.126 | <u>PDPR</u>    |
|  | 0.593 | 0.118 | <u>GAST</u>    |
|  | 0.601 | 0.127 | <u>PEX5L</u>   |
|  | 0.598 | 0.124 | PRDM9          |
|  | 0.603 | 0.129 | <u>SHMT1</u>   |
|  | 0.593 | 0.120 | PPYR1          |
|  | 0.593 | 0.121 | <u>NEU3</u>    |
|  | 0.592 | 0.119 | <u>GP2</u>     |
|  | 0.584 | 0.113 | <u>SEMA3D</u>  |
|  | 0.602 | 0.130 | <u>ALX4</u>    |
|  | 0.587 | 0.116 | <u>LBX1</u>    |
|  | 0.588 | 0.117 | <u>AFF4</u>    |
|  | 0.596 | 0.126 | <u>MYO5A</u>   |

|  |       |       |                 |
|--|-------|-------|-----------------|
|  | 0.593 | 0.123 | <u>PSG4</u>     |
|  | 0.599 | 0.129 | <u>GPR161</u>   |
|  | 0.600 | 0.131 | <u>OPN1SW</u>   |
|  | 0.589 | 0.120 | <u>PDE12</u>    |
|  | 0.596 | 0.127 | <u>TAL1</u>     |
|  | 0.599 | 0.131 | <u>COL6A2</u>   |
|  | 0.603 | 0.135 | ATXN8OS         |
|  | 0.591 | 0.123 | <u>KRT38</u>    |
|  | 0.581 | 0.113 | <u>HCFC1</u>    |
|  | 0.596 | 0.129 | REG1P           |
|  | 0.583 | 0.115 | <u>DEC1</u>     |
|  | 0.590 | 0.123 | VN1R1           |
|  | 0.580 | 0.114 | <u>GPR97</u>    |
|  | 0.586 | 0.121 | <u>C15ORF39</u> |
|  | 0.600 | 0.135 | TAAR2           |
|  | 0.596 | 0.131 | ZNF695          |
|  | 0.588 | 0.124 | <u>AGAP2</u>    |
|  | 0.589 | 0.124 | <u>ISG20L2</u>  |
|  | 0.541 | 0.077 | <u>CEBPA</u>    |
|  | 0.591 | 0.128 | <u>SLC24A2</u>  |
|  | 0.597 | 0.133 | HTR7P1          |
|  | 0.586 | 0.123 | <u>RUNX1T1</u>  |
|  | 0.590 | 0.127 | <u>OR10J1</u>   |
|  | 0.603 | 0.141 | <u>APC2</u>     |
|  | 0.598 | 0.136 | <u>ZER1</u>     |
|  | 0.588 | 0.127 | <u>ADAMTS6</u>  |
|  | 0.589 | 0.129 | TRHR            |
|  | 0.583 | 0.123 | ZNF343          |
|  | 0.585 | 0.125 | <u>HDAC11</u>   |
|  | 0.583 | 0.123 | <u>ANKRD26</u>  |
|  | 0.593 | 0.134 | <u>GABRA1</u>   |
|  | 0.573 | 0.114 | <u>FAM120A</u>  |
|  | 0.586 | 0.127 | <u>CEP152</u>   |
|  | 0.594 | 0.135 | <u>GLRA3</u>    |
|  | 0.578 | 0.120 | <u>SLC5A5</u>   |
|  | 0.599 | 0.140 | <u>PCSK2</u>    |
|  | 0.538 | 0.079 | <u>KLHL9</u>    |
|  | 0.589 | 0.131 | <u>KLRC4</u>    |
|  | 0.588 | 0.130 | <u>HERC4</u>    |
|  | 0.590 | 0.133 | <u>EHD2</u>     |
|  | 0.586 | 0.130 | <u>SCN3B</u>    |
|  | 0.592 | 0.136 | <u>SLC4A7</u>   |
|  | 0.585 | 0.129 | <u>KIF1A</u>    |
|  | 0.591 | 0.135 | <u>CLOCK</u>    |
|  | 0.581 | 0.126 | <u>PDCD6</u>    |
|  | 0.598 | 0.143 | <u>MICAL2</u>   |
|  | 0.586 | 0.131 | <u>KIAA1467</u> |

|  |       |       |                 |
|--|-------|-------|-----------------|
|  | 0.579 | 0.125 | P2RX6           |
|  | 0.578 | 0.124 | <u>SERPINB2</u> |
|  | 0.581 | 0.127 | <u>KAZN</u>     |
|  | 0.593 | 0.140 | <u>ATG10</u>    |
|  | 0.579 | 0.126 | <u>PNLIPRP2</u> |
|  | 0.589 | 0.137 | <u>MSX2</u>     |
|  | 0.582 | 0.131 | <u>FSHR</u>     |
|  | 0.583 | 0.133 | <u>FGF18</u>    |
|  | 0.574 | 0.124 | RBFOX2          |
|  | 0.594 | 0.144 | <u>HOXD3</u>    |
|  | 0.588 | 0.138 | <u>TIAM2</u>    |
|  | 0.517 | 0.067 | <u>STXBP2</u>   |
|  | 0.574 | 0.125 | PP13            |
|  | 0.588 | 0.140 | <u>LAMB4</u>    |
|  | 0.565 | 0.116 | <u>FSHB</u>     |
|  | 0.564 | 0.116 | <u>ZCWPW1</u>   |
|  | 0.585 | 0.137 | AHCYL2          |
|  | 0.567 | 0.120 | <u>HABP4</u>    |
|  | 0.577 | 0.130 | <u>SDHD</u>     |
|  | 0.588 | 0.141 | <u>PRELP</u>    |
|  | 0.571 | 0.124 | <u>ASH1L</u>    |
|  | 0.582 | 0.134 | <u>BPY2</u>     |
|  | 0.580 | 0.133 | DKFZP434C153    |
|  | 0.575 | 0.128 | C3ORF51         |
|  | 0.575 | 0.128 | <u>UBR2</u>     |
|  | 0.570 | 0.123 | <u>CLTA</u>     |
|  | 0.576 | 0.131 | <u>CNTFR</u>    |
|  | 0.578 | 0.132 | <u>IL22</u>     |
|  | 0.566 | 0.121 | <u>KCNMA1</u>   |
|  | 0.564 | 0.119 | <u>GGA3</u>     |
|  | 0.572 | 0.128 | <u>MYH15</u>    |
|  | 0.581 | 0.138 | <u>SPTB</u>     |
|  | 0.572 | 0.128 | <u>PAX5</u>     |
|  | 0.567 | 0.125 | <u>ANP32C</u>   |
|  | 0.593 | 0.150 | <u>MC5R</u>     |
|  | 0.584 | 0.142 | <u>PLCB1</u>    |
|  | 0.568 | 0.126 | <u>FOXA2</u>    |
|  | 0.558 | 0.117 | LRRC37A4        |
|  | 0.561 | 0.120 | <u>UBA6</u>     |
|  | 0.574 | 0.133 | <u>GSG1</u>     |
|  | 0.568 | 0.127 | <u>ELL</u>      |
|  | 0.577 | 0.136 | <u>PSG3</u>     |
|  | 0.573 | 0.133 | GPR75           |
|  | 0.567 | 0.127 | <u>CHRM2</u>    |
|  | 0.562 | 0.122 | <u>SLC25A31</u> |
|  | 0.586 | 0.147 | <u>TNFRSF9</u>  |
|  | 0.565 | 0.126 | <u>SCN7A</u>    |

|  |       |       |                 |
|--|-------|-------|-----------------|
|  | 0.552 | 0.113 | <u>MGAT5</u>    |
|  | 0.552 | 0.113 | <u>MBNL1</u>    |
|  | 0.574 | 0.135 | <u>EFHC2</u>    |
|  | 0.574 | 0.135 | <u>HTR4</u>     |
|  | 0.583 | 0.145 | ZMPSTE24        |
|  | 0.576 | 0.137 | <u>RRH</u>      |
|  | 0.542 | 0.106 | <u>CREB1</u>    |
|  | 0.585 | 0.148 | <u>RNF5</u>     |
|  | 0.563 | 0.127 | ZNF688          |
|  | 0.579 | 0.143 | <u>ADARB1</u>   |
|  | 0.577 | 0.141 | <u>C4ORF6</u>   |
|  | 0.575 | 0.139 | <u>PPP2R2B</u>  |
|  | 0.560 | 0.126 | <u>PDAP1</u>    |
|  | 0.572 | 0.137 | SLC5A2          |
|  | 0.561 | 0.126 | UBQLN3          |
|  | 0.562 | 0.128 | <u>TAF7L</u>    |
|  | 0.558 | 0.125 | <u>POU1F1</u>   |
|  | 0.571 | 0.137 | <u>CYP2C8</u>   |
|  | 0.578 | 0.145 | <u>NIPAL3</u>   |
|  | 0.570 | 0.137 | <u>SLC28A2</u>  |
|  | 0.578 | 0.145 | <u>POLG</u>     |
|  | 0.585 | 0.152 | <u>RBMS2</u>    |
|  | 0.570 | 0.137 | AURKC           |
|  | 0.583 | 0.151 | TSKS            |
|  | 0.573 | 0.140 | <u>ELAC1</u>    |
|  | 0.564 | 0.132 | <u>ALK</u>      |
|  | 0.561 | 0.129 | <u>DENND1C</u>  |
|  | 0.578 | 0.146 | <u>EYA3</u>     |
|  | 0.552 | 0.121 | <u>RXFP3</u>    |
|  | 0.582 | 0.152 | <u>OBSL1</u>    |
|  | 0.555 | 0.125 | <u>HNRPDL</u>   |
|  | 0.568 | 0.138 | <u>KCNC3</u>    |
|  | 0.562 | 0.132 | <u>NLRP3</u>    |
|  | 0.570 | 0.141 | <u>KRIT1</u>    |
|  | 0.522 | 0.093 | <u>MKNK1</u>    |
|  | 0.574 | 0.145 | <u>LMF1</u>     |
|  | 0.565 | 0.137 | <u>TAS2R7</u>   |
|  | 0.551 | 0.124 | <u>IGF2R</u>    |
|  | 0.567 | 0.141 | CTAGE11P        |
|  | 0.573 | 0.147 | <u>PI4K2A</u>   |
|  | 0.568 | 0.142 | PLSCR2          |
|  | 0.571 | 0.145 | ZNF277          |
|  | 0.555 | 0.129 | <u>SLC2A1</u>   |
|  | 0.559 | 0.134 | <u>ARHGAP24</u> |
|  | 0.576 | 0.151 | <u>NEBL</u>     |
|  | 0.541 | 0.116 | FLJ10038        |
|  | 0.562 | 0.139 | <u>GPR68</u>    |

|  |       |       |                  |
|--|-------|-------|------------------|
|  | 0.569 | 0.146 | <u>SLCO1A2</u>   |
|  | 0.551 | 0.128 | C15ORF34         |
|  | 0.545 | 0.122 | ZNF780B          |
|  | 0.555 | 0.133 | <u>TAF4</u>      |
|  | 0.551 | 0.128 | <u>GJC2</u>      |
|  | 0.571 | 0.149 | KIAA1654         |
|  | 0.561 | 0.139 | <u>PRDM2</u>     |
|  | 0.543 | 0.121 | <u>PCDH7</u>     |
|  | 0.564 | 0.143 | <u>ARID1A</u>    |
|  | 0.551 | 0.131 | EBF2             |
|  | 0.567 | 0.146 | <u>TIMM17A</u>   |
|  | 0.572 | 0.152 | GCNT4            |
|  | 0.557 | 0.137 | <u>CHIA</u>      |
|  | 0.556 | 0.137 | <u>CEACAM4</u>   |
|  | 0.567 | 0.148 | <u>FRMD8</u>     |
|  | 0.551 | 0.132 | <u>CD5</u>       |
|  | 0.557 | 0.139 | <u>ADAMTS7</u>   |
|  | 0.545 | 0.127 | <u>LDHAL6B</u>   |
|  | 0.549 | 0.132 | <u>ULK2</u>      |
|  | 0.550 | 0.134 | <u>ADCY1</u>     |
|  | 0.562 | 0.146 | <u>ZCCHC11</u>   |
|  | 0.545 | 0.130 | <u>POM121L9P</u> |
|  | 0.544 | 0.129 | <u>UBAP2L</u>    |
|  | 0.550 | 0.135 | <u>ORIG1</u>     |
|  | 0.559 | 0.144 | <u>RGS14</u>     |
|  | 0.549 | 0.135 | <u>MMP11</u>     |
|  | 0.560 | 0.147 | <u>CNGB1</u>     |
|  | 0.550 | 0.137 | <u>RAPGEF3</u>   |
|  | 0.554 | 0.141 | <u>MYL4</u>      |
|  | 0.566 | 0.154 | <u>CA1</u>       |
|  | 0.541 | 0.129 | LOC730227        |
|  | 0.543 | 0.131 | <u>CPT1A</u>     |
|  | 0.546 | 0.135 | <u>GRM1</u>      |
|  | 0.538 | 0.127 | <u>REPS1</u>     |
|  | 0.561 | 0.150 | <u>PBXIP1</u>    |
|  | 0.549 | 0.138 | <u>TCF25</u>     |
|  | 0.546 | 0.136 | <u>AKAP9</u>     |
|  | 0.558 | 0.148 | <u>RQCD1</u>     |
|  | 0.551 | 0.142 | <u>DES</u>       |
|  | 0.547 | 0.137 | <u>TSHR</u>      |
|  | 0.538 | 0.129 | C7ORF58          |
|  | 0.553 | 0.143 | <u>NPBWR2</u>    |
|  | 0.541 | 0.132 | <u>PTEN</u>      |
|  | 0.543 | 0.137 | <u>SEMA7A</u>    |
|  | 0.535 | 0.128 | <u>SLC16A3</u>   |
|  | 0.554 | 0.148 | <u>HIC2</u>      |
|  | 0.567 | 0.161 | <u>FEZ1</u>      |

|  |       |       |                 |
|--|-------|-------|-----------------|
|  | 0.559 | 0.153 | <u>SYN2</u>     |
|  | 0.559 | 0.154 | <u>KRTAP2-4</u> |
|  | 0.544 | 0.139 | <u>IFNA21</u>   |
|  | 0.527 | 0.122 | <u>KLHL11</u>   |
|  | 0.546 | 0.141 | <u>GNAT1</u>    |
|  | 0.525 | 0.120 | <u>TRIM2</u>    |
|  | 0.544 | 0.139 | <u>CELF3</u>    |
|  | 0.544 | 0.140 | <u>CTNS</u>     |
|  | 0.546 | 0.141 | <u>KCNA2</u>    |
|  | 0.537 | 0.133 | <u>HOXC11</u>   |
|  | 0.548 | 0.144 | <u>GGA1</u>     |
|  | 0.541 | 0.137 | <u>CHRND</u>    |
|  | 0.543 | 0.140 | <u>PPP1R3A</u>  |
|  | 0.539 | 0.136 | <u>HNRNPU</u>   |
|  | 0.541 | 0.137 | <u>AFF1</u>     |
|  | 0.549 | 0.147 | <u>HNRNPD</u>   |
|  | 0.549 | 0.148 | <u>CC2D1A</u>   |
|  | 0.539 | 0.138 | <u>RDH8</u>     |
|  | 0.551 | 0.150 | <u>ABCB11</u>   |
|  | 0.539 | 0.139 | <u>PTENP1</u>   |
|  | 0.531 | 0.131 | <u>ZC3H15</u>   |
|  | 0.546 | 0.146 | <u>ACRV1</u>    |
|  | 0.550 | 0.150 | <u>B3GALT1</u>  |
|  | 0.528 | 0.129 | <u>TLX2</u>     |
|  | 0.548 | 0.149 | <u>KCNE2</u>    |
|  | 0.539 | 0.141 | <u>RAPGEF2</u>  |
|  | 0.553 | 0.155 | <u>TRPC6</u>    |
|  | 0.513 | 0.115 | <u>TFAP2A</u>   |
|  | 0.513 | 0.115 | <u>UBE2L3</u>   |
|  | 0.508 | 0.110 | <u>HOMER2</u>   |
|  | 0.548 | 0.151 | <u>GPX5</u>     |
|  | 0.548 | 0.151 | <u>MED18</u>    |
|  | 0.535 | 0.138 | <u>PMAIP1</u>   |
|  | 0.553 | 0.156 | <u>ASMT</u>     |
|  | 0.533 | 0.136 | <u>PARD6B</u>   |
|  | 0.533 | 0.136 | <u>OR7C1</u>    |
|  | 0.549 | 0.152 | <u>A4GNT</u>    |
|  | 0.547 | 0.151 | <u>C1QL1</u>    |
|  | 0.544 | 0.148 | <u>PVT1</u>     |
|  | 0.516 | 0.120 | <u>COL3A1</u>   |
|  | 0.546 | 0.151 | <u>VPS13A</u>   |
|  | 0.542 | 0.147 | <u>RNASE1</u>   |
|  | 0.538 | 0.143 | <u>TAF6L</u>    |
|  | 0.541 | 0.146 | <u>GABRB2</u>   |
|  | 0.540 | 0.145 | <u>HSD3B1</u>   |
|  | 0.526 | 0.132 | <u>CCDC28B</u>  |
|  | 0.533 | 0.139 | <u>KCNV2</u>    |

|  |       |       |                |
|--|-------|-------|----------------|
|  | 0.530 | 0.136 | SPINLW1        |
|  | 0.544 | 0.152 | <u>KCNJ6</u>   |
|  | 0.535 | 0.143 | <u>SLC9A3</u>  |
|  | 0.532 | 0.141 | <u>KCNH6</u>   |
|  | 0.525 | 0.134 | <u>TCP10L</u>  |
|  | 0.540 | 0.149 | BMP10          |
|  | 0.535 | 0.144 | <u>CXORF57</u> |
|  | 0.543 | 0.153 | <u>BSN</u>     |
|  | 0.540 | 0.151 | <u>TRADD</u>   |
|  | 0.547 | 0.159 | <u>LTBP4</u>   |
|  | 0.545 | 0.157 | <u>ST3GAL6</u> |
|  | 0.544 | 0.156 | <u>ELAC2</u>   |
|  | 0.540 | 0.153 | <u>ST14</u>    |
|  | 0.533 | 0.146 | <u>GPR137</u>  |
|  | 0.534 | 0.147 | <u>BAZ2B</u>   |
|  | 0.520 | 0.133 | ZNF192         |
|  | 0.542 | 0.157 | C13ORF44       |
|  | 0.540 | 0.154 | <u>DMC1</u>    |
|  | 0.538 | 0.152 | <u>DMPK</u>    |
|  | 0.533 | 0.148 | <u>MLNR</u>    |
|  | 0.523 | 0.138 | LOC100129648   |
|  | 0.534 | 0.150 | <u>FUT3</u>    |
|  | 0.545 | 0.161 | <u>TMEM206</u> |
|  | 0.528 | 0.144 | <u>FKBP1A</u>  |
|  | 0.520 | 0.136 | <u>BTG4</u>    |
|  | 0.536 | 0.152 | <u>LPAL2</u>   |
|  | 0.536 | 0.152 | <u>ELOVL5</u>  |
|  | 0.544 | 0.161 | <u>TRPM1</u>   |
|  | 0.530 | 0.148 | <u>NEB</u>     |
|  | 0.529 | 0.146 | <u>SPPL2B</u>  |
|  | 0.535 | 0.153 | <u>TNFRSF4</u> |
|  | 0.532 | 0.150 | <u>MMP27</u>   |
|  | 0.526 | 0.145 | <u>FOXE1</u>   |
|  | 0.543 | 0.163 | KIAA0748       |
|  | 0.526 | 0.146 | <u>LUZP4</u>   |
|  | 0.541 | 0.161 | C15ORF2        |
|  | 0.531 | 0.152 | <u>GRIP1</u>   |
|  | 0.523 | 0.144 | <u>ICOSLG</u>  |
|  | 0.544 | 0.165 | <u>NOVA2</u>   |
|  | 0.524 | 0.145 | <u>DNM2</u>    |
|  | 0.542 | 0.164 | <u>DLX4</u>    |
|  | 0.535 | 0.158 | MYO7B          |
|  | 0.529 | 0.151 | <u>INVS</u>    |
|  | 0.525 | 0.148 | <u>TSHB</u>    |
|  | 0.515 | 0.138 | <u>TAAR5</u>   |
|  | 0.531 | 0.157 | SCN11A         |
|  | 0.525 | 0.151 | <u>GABRA2</u>  |

|  |       |       |                  |
|--|-------|-------|------------------|
|  | 0.535 | 0.160 | <u>UST</u>       |
|  | 0.529 | 0.155 | <u>BCL2L11</u>   |
|  | 0.528 | 0.154 | <u>PCDHGA1</u>   |
|  | 0.517 | 0.143 | <u>PDE11A</u>    |
|  | 0.529 | 0.156 | <u>PIAS2</u>     |
|  | 0.518 | 0.146 | GML              |
|  | 0.521 | 0.149 | <u>PAK7</u>      |
|  | 0.527 | 0.154 | C4ORF10          |
|  | 0.529 | 0.157 | <u>NR5A2</u>     |
|  | 0.506 | 0.135 | <u>SAFB</u>      |
|  | 0.528 | 0.158 | PSG2             |
|  | 0.522 | 0.152 | MUC8             |
|  | 0.522 | 0.153 | <u>DTX3</u>      |
|  | 0.519 | 0.151 | <u>WAS</u>       |
|  | 0.520 | 0.151 | <u>TP63</u>      |
|  | 0.527 | 0.158 | <u>RYR2</u>      |
|  | 0.502 | 0.133 | <u>ABCF1</u>     |
|  | 0.522 | 0.154 | <u>TLL4</u>      |
|  | 0.516 | 0.147 | <u>C14ORF162</u> |
|  | 0.523 | 0.154 | <u>KLK10</u>     |
|  | 0.520 | 0.152 | C17ORF88         |
|  | 0.514 | 0.146 | <u>EHD1</u>      |
|  | 0.518 | 0.151 | <u>DISC1</u>     |
|  | 0.520 | 0.152 | <u>MIP</u>       |
|  | 0.518 | 0.151 | <u>PER2</u>      |
|  | 0.525 | 0.159 | DNAJC16          |
|  | 0.523 | 0.157 | <u>ZBTB7A</u>    |
|  | 0.529 | 0.163 | <u>FKBP8</u>     |
|  | 0.503 | 0.138 | <u>RRP8</u>      |
|  | 0.510 | 0.145 | <u>KIR2DS1</u>   |
|  | 0.522 | 0.157 | ZNF335           |
|  | 0.508 | 0.144 | GNAT3            |
|  | 0.509 | 0.145 | <u>ADAMTSL4</u>  |
|  | 0.505 | 0.140 | LENEP            |
|  | 0.532 | 0.169 | <u>KIAA1045</u>  |
|  | 0.510 | 0.146 | <u>LAG3</u>      |
|  | 0.511 | 0.148 | <u>USP29</u>     |
|  | 0.514 | 0.152 | <u>TACSTD2</u>   |
|  | 0.521 | 0.159 | ZNF440           |
|  | 0.509 | 0.148 | <u>MCFD2</u>     |
|  | 0.520 | 0.159 | <u>RAP2A</u>     |
|  | 0.516 | 0.155 | <u>AKAP1</u>     |
|  | 0.516 | 0.156 | <u>OGG1</u>      |
|  | 0.510 | 0.150 | <u>SH3GL3</u>    |
|  | 0.516 | 0.156 | <u>PCDH11Y</u>   |
|  | 0.513 | 0.154 | <u>CHRD</u>      |
|  | 0.515 | 0.156 | <u>TEX15</u>     |

|  |       |       |                 |
|--|-------|-------|-----------------|
|  | 0.514 | 0.155 | <u>KIAA0195</u> |
|  | 0.518 | 0.161 | <u>KIAA1609</u> |
|  | 0.510 | 0.153 | <u>RBMV2FP</u>  |
|  | 0.526 | 0.170 | <u>SLC22A13</u> |
|  | 0.515 | 0.159 | FP588           |
|  | 0.517 | 0.161 | <u>PAX4</u>     |
|  | 0.513 | 0.158 | <u>SVEP1</u>    |
|  | 0.512 | 0.157 | <u>NR2E3</u>    |
|  | 0.512 | 0.157 | <u>PYGO1</u>    |
|  | 0.507 | 0.152 | <u>GGTLC2</u>   |
|  | 0.503 | 0.148 | <u>KHK</u>      |
|  | 0.502 | 0.148 | <u>SLC22A14</u> |
|  | 0.525 | 0.171 | <u>TBC1D2B</u>  |
|  | 0.508 | 0.155 | <u>HNF1B</u>    |
|  | 0.509 | 0.156 | <u>NAA11</u>    |
|  | 0.518 | 0.167 | <u>AHI1</u>     |
|  | 0.505 | 0.153 | <u>IOCK</u>     |
|  | 0.508 | 0.157 | <u>DIMT1</u>    |
|  | 0.513 | 0.162 | <u>CNKSR2</u>   |
|  | 0.510 | 0.160 | <u>NOTCH3</u>   |
|  | 0.511 | 0.161 | <u>LDB3</u>     |
|  | 0.512 | 0.162 | LOC100508797    |
|  | 0.511 | 0.162 | APOL5           |
|  | 0.504 | 0.157 | <u>KIAA1456</u> |
|  | 0.501 | 0.154 | HR44            |
|  | 0.506 | 0.161 | <u>KIF2A</u>    |
|  | 0.521 | 0.176 | <u>SLC22A17</u> |
|  | 0.506 | 0.162 | ZNF154          |
|  | 0.511 | 0.167 | <u>BRF1</u>     |
|  | 0.503 | 0.159 | <u>RNF185</u>   |
|  | 0.508 | 0.165 | <u>RASGRP2</u>  |
|  | 0.505 | 0.164 | ZNF280A         |
|  | 0.505 | 0.164 | LOC647070       |
|  | 0.501 | 0.161 | <u>EFNA5</u>    |
|  | 0.507 | 0.167 | <u>ANK2</u>     |
|  | 0.501 | 0.161 | <u>SLIT3</u>    |
|  | 0.504 | 0.165 | <u>ARL4C</u>    |
|  | 0.501 | 0.163 | <u>PRKAR2A</u>  |
|  | 0.505 | 0.169 | <u>PCDHA2</u>   |
|  | 0.502 | 0.167 | <u>TAS2R4</u>   |
|  | 0.508 | 0.174 | <u>HPCAL4</u>   |
|  | 0.504 | 0.173 | <u>FLT1</u>     |
|  | 0.501 | 0.171 | <u>CCHCR1</u>   |
|  | 0.504 | 0.177 | <u>PCYT1B</u>   |
|  | 0.501 | 0.178 | <u>CSNK1G1</u>  |

## Combination prediction result

| <u>Name</u>     | <u>Overlap count</u> | <u>Up</u> | <u>Down</u> | <u>Result</u> |
|-----------------|----------------------|-----------|-------------|---------------|
| <u>INS</u>      | 4                    | 2         | 2           |               |
| <u>ABHD10</u>   | 3                    | 1         | 2           |               |
| <u>AFF4</u>     | 3                    | 2         | 1           |               |
| <u>AURKA</u>    | 3                    | 2         | 1           |               |
| <u>CAMKK2</u>   | 3                    | 2         | 1           |               |
| <u>CAT</u>      | 3                    | 2         | 1           |               |
| <u>CETP</u>     | 3                    | 1         | 2           |               |
| <u>DCAF17</u>   | 3                    | 1         | 2           |               |
| <u>DIAPH2</u>   | 3                    | 1         | 2           |               |
| <u>DPF1</u>     | 3                    | 1         | 2           |               |
| <u>FBXO42</u>   | 3                    | 2         | 1           |               |
| <u>FKBP5</u>    | 3                    | 2         | 1           |               |
| <u>GPR19</u>    | 3                    | 1         | 2           |               |
| <u>ID1</u>      | 3                    | 3         | 0           |               |
| <u>IGF2R</u>    | 3                    | 3         | 0           |               |
| <u>KRT3</u>     | 3                    | 1         | 2           |               |
| <u>MAP3K9</u>   | 3                    | 2         | 1           |               |
| <u>MCMBP</u>    | 3                    | 1         | 2           |               |
| <u>MDM2</u>     | 3                    | 1         | 2           |               |
| <u>MXD1</u>     | 3                    | 2         | 1           |               |
| <u>PAN2</u>     | 3                    | 2         | 1           |               |
| <u>POLG2</u>    | 3                    | 1         | 2           |               |
| <u>RARG</u>     | 3                    | 3         | 0           |               |
| <u>REN</u>      | 3                    | 2         | 1           |               |
| <u>SCD5</u>     | 3                    | 2         | 1           |               |
| <u>SLC6A4</u>   | 3                    | 1         | 2           |               |
| <u>SP2</u>      | 3                    | 2         | 1           |               |
| <u>SUV39H2</u>  | 3                    | 1         | 2           |               |
| <u>TNNT1</u>    | 3                    | 2         | 1           |               |
| <u>TPSB2</u>    | 3                    | 1         | 2           |               |
| <u>TRIM13</u>   | 3                    | 3         | 0           |               |
| <u>UBR7</u>     | 3                    | 0         | 3           |               |
| <u>ZBTB43</u>   | 3                    | 1         | 2           |               |
| <u>AASDHPPT</u> | 2                    | 0         | 2           |               |
| <u>ABP1</u>     | 2                    | 2         | 0           |               |
| <u>ADH5</u>     | 2                    | 0         | 2           |               |
| <u>AKAP9</u>    | 2                    | 2         | 0           |               |
| <u>AMACR</u>    | 2                    | 2         | 0           |               |
| <u>ANXA1</u>    | 2                    | 0         | 2           |               |
| <u>ARFGEF2</u>  | 2                    | 2         | 0           |               |
| <u>ARID1A</u>   | 2                    | 2         | 0           |               |
| <u>ATF6</u>     | 2                    | 2         | 0           |               |
| <u>ATMIN</u>    | 2                    | 0         | 2           |               |
| <u>ATP9B</u>    | 2                    | 2         | 0           |               |
| <u>BAIAP2</u>   | 2                    | 2         | 0           |               |

|                |   |   |   |  |
|----------------|---|---|---|--|
| <u>BAZ2A</u>   | 2 | 2 | 0 |  |
| <u>BAZ2B</u>   | 2 | 2 | 0 |  |
| <u>BIN1</u>    | 2 | 2 | 0 |  |
| C1ORF183       | 2 | 0 | 2 |  |
| <u>CAB39</u>   | 2 | 0 | 2 |  |
| <u>CASP8</u>   | 2 | 0 | 2 |  |
| <u>CBR3</u>    | 2 | 2 | 0 |  |
| <u>CBX7</u>    | 2 | 0 | 2 |  |
| CC2D1A         | 2 | 2 | 0 |  |
| <u>CCND2</u>   | 2 | 2 | 0 |  |
| <u>CCNT1</u>   | 2 | 2 | 0 |  |
| <u>CCNT2</u>   | 2 | 2 | 0 |  |
| <u>CDK5R1</u>  | 2 | 2 | 0 |  |
| <u>CELP</u>    | 2 | 2 | 0 |  |
| <u>CEP152</u>  | 2 | 2 | 0 |  |
| <u>CHIC2</u>   | 2 | 2 | 0 |  |
| <u>CHRNE</u>   | 2 | 2 | 0 |  |
| <u>CLCN2</u>   | 2 | 0 | 2 |  |
| <u>CLDN15</u>  | 2 | 2 | 0 |  |
| <u>CLDN9</u>   | 2 | 2 | 0 |  |
| <u>CLIC3</u>   | 2 | 0 | 2 |  |
| <u>CREB1</u>   | 2 | 2 | 0 |  |
| <u>CREB3L1</u> | 2 | 2 | 0 |  |
| <u>CRKL</u>    | 2 | 2 | 0 |  |
| <u>CSNK2A1</u> | 2 | 2 | 0 |  |
| <u>CYP19A1</u> | 2 | 2 | 0 |  |
| <u>DDR1</u>    | 2 | 2 | 0 |  |
| <u>DLX4</u>    | 2 | 2 | 0 |  |
| <u>DMPK</u>    | 2 | 2 | 0 |  |
| <u>DPYSL4</u>  | 2 | 2 | 0 |  |
| <u>DYSF</u>    | 2 | 2 | 0 |  |
| <u>EBAG9</u>   | 2 | 0 | 2 |  |
| <u>ECI2</u>    | 2 | 0 | 2 |  |
| <u>EDN1</u>    | 2 | 2 | 0 |  |
| <u>EDNRA</u>   | 2 | 2 | 0 |  |
| <u>EFNA3</u>   | 2 | 0 | 2 |  |
| <u>EHD1</u>    | 2 | 2 | 0 |  |
| <u>EHHADH</u>  | 2 | 0 | 2 |  |
| <u>ELAVL1</u>  | 2 | 0 | 2 |  |
| <u>ELK1</u>    | 2 | 2 | 0 |  |
| <u>ELK4</u>    | 2 | 2 | 0 |  |
| <u>EPHA4</u>   | 2 | 2 | 0 |  |
| <u>EPRS</u>    | 2 | 0 | 2 |  |
| <u>ERC1</u>    | 2 | 2 | 0 |  |
| <u>ETAA1</u>   | 2 | 0 | 2 |  |
| <u>EVL</u>     | 2 | 0 | 2 |  |
| <u>EWSR1</u>   | 2 | 2 | 0 |  |
| <u>FAM172A</u> | 2 | 0 | 2 |  |

|                  |   |   |   |  |
|------------------|---|---|---|--|
| <u>FDXR</u>      | 2 | 2 | 0 |  |
| <u>FHL2</u>      | 2 | 2 | 0 |  |
| <u>FOXC1</u>     | 2 | 2 | 0 |  |
| <u>FRMD4B</u>    | 2 | 2 | 0 |  |
| <u>GAL</u>       | 2 | 2 | 0 |  |
| <u>GATA1</u>     | 2 | 2 | 0 |  |
| <u>GGA3</u>      | 2 | 2 | 0 |  |
| <u>GMEB1</u>     | 2 | 2 | 0 |  |
| <u>GPX1</u>      | 2 | 2 | 0 |  |
| <u>GRB10</u>     | 2 | 0 | 2 |  |
| <u>H6PD</u>      | 2 | 2 | 0 |  |
| <u>HEG1</u>      | 2 | 2 | 0 |  |
| <u>HIC2</u>      | 2 | 2 | 0 |  |
| <u>HIST1H1D</u>  | 2 | 2 | 0 |  |
| <u>HIST1H1T</u>  | 2 | 2 | 0 |  |
| <u>HIST1H2AM</u> | 2 | 2 | 0 |  |
| <u>HIST1H2BN</u> | 2 | 2 | 0 |  |
| <u>HIST1H2BO</u> | 2 | 2 | 0 |  |
| <u>HIST1H4D</u>  | 2 | 2 | 0 |  |
| <u>HIST1H4H</u>  | 2 | 2 | 0 |  |
| <u>HK2</u>       | 2 | 0 | 2 |  |
| <u>HMOX1</u>     | 2 | 2 | 0 |  |
| <u>HP</u>        | 2 | 0 | 2 |  |
| <u>HUS1</u>      | 2 | 2 | 0 |  |
| <u>IER3</u>      | 2 | 0 | 2 |  |
| <u>IL11</u>      | 2 | 2 | 0 |  |
| <u>IL12B</u>     | 2 | 2 | 0 |  |
| <u>IL1RN</u>     | 2 | 2 | 0 |  |
| <u>IRGQ</u>      | 2 | 2 | 0 |  |
| <u>KATNB1</u>    | 2 | 0 | 2 |  |
| <u>KDM4C</u>     | 2 | 2 | 0 |  |
| <u>KDM5B</u>     | 2 | 2 | 0 |  |
| <u>KIAA0753</u>  | 2 | 2 | 0 |  |
| <u>KIAA1324</u>  | 2 | 2 | 0 |  |
| <u>KIF18A</u>    | 2 | 2 | 0 |  |
| <u>KLK13</u>     | 2 | 2 | 0 |  |
| <u>KLK2</u>      | 2 | 2 | 0 |  |
| <u>KRT5</u>      | 2 | 0 | 2 |  |
| <u>LSS</u>       | 2 | 2 | 0 |  |
| <u>MAP3K5</u>    | 2 | 0 | 2 |  |
| <u>MARCH6</u>    | 2 | 2 | 0 |  |
| <u>MAST4</u>     | 2 | 0 | 2 |  |
| <u>MAU2</u>      | 2 | 2 | 0 |  |
| <u>MEAF6</u>     | 2 | 2 | 0 |  |
| <u>MKNK1</u>     | 2 | 2 | 0 |  |
| <u>MSX2</u>      | 2 | 2 | 0 |  |
| <u>NCLN</u>      | 2 | 2 | 0 |  |
| <u>NIPA2</u>     | 2 | 0 | 2 |  |

|                 |   |   |   |  |
|-----------------|---|---|---|--|
| <u>NIPBL</u>    | 2 | 2 | 0 |  |
| <u>NPPB</u>     | 2 | 2 | 0 |  |
| <u>NR2C2</u>    | 2 | 2 | 0 |  |
| <u>NR4A1</u>    | 2 | 2 | 0 |  |
| <u>NR5A1</u>    | 2 | 2 | 0 |  |
| <u>ODF1</u>     | 2 | 0 | 2 |  |
| <u>OGFR</u>     | 2 | 0 | 2 |  |
| <u>OGT</u>      | 2 | 2 | 0 |  |
| <u>OLFM1</u>    | 2 | 2 | 0 |  |
| <u>OPA3</u>     | 2 | 0 | 2 |  |
| <u>OR2B6</u>    | 2 | 2 | 0 |  |
| <u>OVOL1</u>    | 2 | 2 | 0 |  |
| <u>OVOL2</u>    | 2 | 2 | 0 |  |
| <u>PARD6B</u>   | 2 | 2 | 0 |  |
| <u>PARP2</u>    | 2 | 0 | 2 |  |
| <u>PER3</u>     | 2 | 0 | 2 |  |
| <u>PHLPP1</u>   | 2 | 2 | 0 |  |
| <u>PHYH</u>     | 2 | 2 | 0 |  |
| <u>PIK3R3</u>   | 2 | 2 | 0 |  |
| <u>PLAGL2</u>   | 2 | 2 | 0 |  |
| <u>PLEKHM1</u>  | 2 | 2 | 0 |  |
| <u>PLLP</u>     | 2 | 2 | 0 |  |
| <u>PLXNA2</u>   | 2 | 2 | 0 |  |
| <u>PMF1</u>     | 2 | 2 | 0 |  |
| <u>PRDM10</u>   | 2 | 2 | 0 |  |
| <u>PRL</u>      | 2 | 2 | 0 |  |
| <u>PROC</u>     | 2 | 2 | 0 |  |
| <u>PRPSAP1</u>  | 2 | 0 | 2 |  |
| <u>PSG9</u>     | 2 | 2 | 0 |  |
| <u>PSMA6</u>    | 2 | 2 | 0 |  |
| <u>PTMS</u>     | 2 | 2 | 0 |  |
| <u>PTPN21</u>   | 2 | 2 | 0 |  |
| <u>PWP1</u>     | 2 | 0 | 2 |  |
| <u>RALGAPA1</u> | 2 | 2 | 0 |  |
| <u>RALGAPB</u>  | 2 | 0 | 2 |  |
| <u>RANBP17</u>  | 2 | 2 | 0 |  |
| <u>RCHY1</u>    | 2 | 2 | 0 |  |
| <u>RETSAT</u>   | 2 | 0 | 2 |  |
| <u>RHOT1</u>    | 2 | 0 | 2 |  |
| <u>RNF24</u>    | 2 | 2 | 0 |  |
| <u>RTF1</u>     | 2 | 0 | 2 |  |
| <u>SKIL</u>     | 2 | 2 | 0 |  |
| <u>SLC25A4</u>  | 2 | 2 | 0 |  |
| <u>SLC2A4</u>   | 2 | 2 | 0 |  |
| <u>SLC39A9</u>  | 2 | 2 | 0 |  |
| <u>SLC4A7</u>   | 2 | 2 | 0 |  |
| <u>SLC4A8</u>   | 2 | 0 | 2 |  |
| <u>SLC6A14</u>  | 2 | 2 | 0 |  |

|                  |   |   |   |  |
|------------------|---|---|---|--|
| <u>SMARCD2</u>   | 2 | 0 | 2 |  |
| <u>SMC5</u>      | 2 | 2 | 0 |  |
| <u>SORBS1</u>    | 2 | 2 | 0 |  |
| <u>SOX15</u>     | 2 | 2 | 0 |  |
| <u>SPATA20</u>   | 2 | 2 | 0 |  |
| <u>SPR</u>       | 2 | 2 | 0 |  |
| <u>SPRED2</u>    | 2 | 2 | 0 |  |
| <u>SRRM2</u>     | 2 | 2 | 0 |  |
| <u>SRSF5</u>     | 2 | 2 | 0 |  |
| <u>SS18L1</u>    | 2 | 0 | 2 |  |
| <u>ST3GAL4</u>   | 2 | 2 | 0 |  |
| <u>STK17A</u>    | 2 | 2 | 0 |  |
| <u>STK3</u>      | 2 | 2 | 0 |  |
| <u>STRN</u>      | 2 | 2 | 0 |  |
| <u>SYNE2</u>     | 2 | 0 | 2 |  |
| <u>SYNJ2</u>     | 2 | 2 | 0 |  |
| <u>TBC1D1</u>    | 2 | 2 | 0 |  |
| <u>TCF25</u>     | 2 | 2 | 0 |  |
| <u>TCF3</u>      | 2 | 2 | 0 |  |
| <u>TFAP2A</u>    | 2 | 2 | 0 |  |
| <u>TFCP2L1</u>   | 2 | 0 | 2 |  |
| <u>TGFB2</u>     | 2 | 2 | 0 |  |
| <u>THBS1</u>     | 2 | 2 | 0 |  |
| <u>TLE4</u>      | 2 | 2 | 0 |  |
| <u>TMEM97</u>    | 2 | 0 | 2 |  |
| <u>TMF1</u>      | 2 | 2 | 0 |  |
| <u>TMPRSS2</u>   | 2 | 2 | 0 |  |
| <u>TNFAIP2</u>   | 2 | 2 | 0 |  |
| <u>TOMM20</u>    | 2 | 0 | 2 |  |
| <u>TRA2A</u>     | 2 | 2 | 0 |  |
| <u>TSC22D2</u>   | 2 | 2 | 0 |  |
| <u>TSPAN5</u>    | 2 | 0 | 2 |  |
| <u>UBAP2L</u>    | 2 | 2 | 0 |  |
| <u>UBE2C</u>     | 2 | 0 | 2 |  |
| <u>UBR4</u>      | 2 | 2 | 0 |  |
| <u>UCN</u>       | 2 | 2 | 0 |  |
| <u>UHRF1BP1L</u> | 2 | 2 | 0 |  |
| <u>VCPIP1</u>    | 2 | 2 | 0 |  |
| <u>VIM</u>       | 2 | 0 | 2 |  |
| <u>VRK3</u>      | 2 | 2 | 0 |  |
| <u>WISP2</u>     | 2 | 2 | 0 |  |
| <u>WSB2</u>      | 2 | 0 | 2 |  |
| <u>WWTR1</u>     | 2 | 2 | 0 |  |
| <u>XIAP</u>      | 2 | 2 | 0 |  |
| <u>XPO4</u>      | 2 | 2 | 0 |  |
| <u>ZDHHC6</u>    | 2 | 0 | 2 |  |
| <u>ZFP30</u>     | 2 | 0 | 2 |  |
| <u>ZFP36L1</u>   | 2 | 2 | 0 |  |

|            |   |   |   |  |
|------------|---|---|---|--|
| <u>ZFX</u> | 2 | 2 | 0 |  |
| ZNF324     | 2 | 2 | 0 |  |
| ZNF335     | 2 | 2 | 0 |  |
| ZNF442     | 2 | 2 | 0 |  |
| ZNF500     | 2 | 0 | 2 |  |
| ZNF609     | 2 | 2 | 0 |  |
| ZNF682     | 2 | 2 | 0 |  |
| ZNF750     | 2 | 2 | 0 |  |

## Complex 2

### mRNA based prediction result

| Pa    | Pi    | DownRegulation  | Pa    | Pi    | UpRegulation     |
|-------|-------|-----------------|-------|-------|------------------|
| 0.843 | 0.020 | <u>TRAF5</u>    | 0.863 | 0.035 | <u>SFRP1</u>     |
| 0.790 | 0.056 | <u>TPM1</u>     | 0.828 | 0.039 | <u>SOLE</u>      |
| 0.758 | 0.065 | <u>ADORA2B</u>  | 0.758 | 0.065 | <u>PFKFB2</u>    |
| 0.758 | 0.065 | <u>CDCA4</u>    | 0.758 | 0.065 | <u>SH3BGRL</u>   |
| 0.758 | 0.065 | <u>CENPJ</u>    | 0.758 | 0.065 | <u>TRIM13</u>    |
| 0.758 | 0.065 | <u>DNAJC9</u>   | 0.718 | 0.051 | <u>ST3GAL1</u>   |
| 0.758 | 0.065 | <u>DONSON</u>   | 0.669 | 0.015 | <u>COX5B</u>     |
| 0.758 | 0.065 | <u>HAUS8</u>    | 0.696 | 0.068 | <u>UGT2B15</u>   |
| 0.758 | 0.065 | <u>MCMBP</u>    | 0.664 | 0.041 | <u>CALM1</u>     |
| 0.758 | 0.065 | <u>NUP155</u>   | 0.693 | 0.083 | <u>ALDOA</u>     |
| 0.758 | 0.065 | <u>PARP2</u>    | 0.673 | 0.067 | <u>KRT6A</u>     |
| 0.758 | 0.065 | <u>RMI1</u>     | 0.688 | 0.084 | <u>CACNG4</u>    |
| 0.758 | 0.065 | <u>SCARA3</u>   | 0.688 | 0.084 | <u>CHRNE</u>     |
| 0.758 | 0.065 | <u>SLC16A14</u> | 0.650 | 0.055 | <u>WISP2</u>     |
| 0.758 | 0.065 | <u>SUV39H2</u>  | 0.688 | 0.109 | <u>GFRA1</u>     |
| 0.739 | 0.065 | <u>GSS</u>      | 0.660 | 0.081 | <u>EXOSC4</u>    |
| 0.696 | 0.056 | <u>NSF</u>      | 0.643 | 0.071 | <u>FADS1</u>     |
| 0.674 | 0.063 | <u>OSBP2</u>    | 0.619 | 0.058 | <u>SCGB2A1</u>   |
| 0.687 | 0.078 | <u>CAPRIN1</u>  | 0.616 | 0.064 | <u>CYTH1</u>     |
| 0.674 | 0.082 | <u>PLEC</u>     | 0.573 | 0.041 | <u>PSMD6</u>     |
| 0.637 | 0.048 | <u>ABCC5</u>    | 0.619 | 0.096 | <u>KRT34</u>     |
| 0.689 | 0.107 | <u>C9ORF40</u>  | 0.539 | 0.035 | <u>NDUFB2</u>    |
| 0.597 | 0.039 | <u>SLTM</u>     | 0.603 | 0.105 | <u>GAS6</u>      |
| 0.597 | 0.039 | <u>ZBTB43</u>   | 0.590 | 0.093 | <u>PTGER4</u>    |
| 0.658 | 0.101 | <u>RPRM</u>     | 0.572 | 0.079 | <u>CHEK1</u>     |
| 0.605 | 0.063 | <u>B4GALT5</u>  | 0.507 | 0.015 | <u>RARG</u>      |
| 0.626 | 0.085 | <u>ERCC2</u>    | 0.614 | 0.126 | <u>HIVEP1</u>    |
| 0.634 | 0.095 | <u>MFAP4</u>    | 0.618 | 0.136 | <u>PPP1CB</u>    |
| 0.643 | 0.106 | <u>CXCL2</u>    | 0.614 | 0.138 | <u>C1ORF63</u>   |
| 0.617 | 0.087 | <u>CXCR7</u>    | 0.537 | 0.063 | <u>GAL</u>       |
| 0.614 | 0.085 | <u>PPP1CA</u>   | 0.505 | 0.031 | <u>UGT2B17</u>   |
| 0.591 | 0.065 | <u>PRIMA1</u>   | 0.545 | 0.075 | <u>SPATA20</u>   |
| 0.571 | 0.053 | <u>EFNA3</u>    | 0.592 | 0.131 | <u>DNAJB14</u>   |
| 0.562 | 0.053 | <u>SRPK2</u>    | 0.568 | 0.107 | <u>MT1B</u>      |
| 0.636 | 0.128 | <u>TMSB15A</u>  | 0.564 | 0.108 | <u>LINC00467</u> |
| 0.592 | 0.085 | <u>TNIK</u>     | 0.563 | 0.109 | <u>KCNH2</u>     |
| 0.575 | 0.071 | <u>TBL1XR1</u>  | 0.563 | 0.109 | <u>PLLP</u>      |
| 0.533 | 0.034 | <u>CAB39</u>    | 0.563 | 0.109 | <u>SLC25A4</u>   |
| 0.569 | 0.073 | <u>PGM2L1</u>   | 0.563 | 0.109 | <u>ZYX</u>       |
| 0.578 | 0.092 | <u>MYNN</u>     | 0.561 | 0.118 | <u>CASP2</u>     |
| 0.567 | 0.086 | <u>L1CAM</u>    | 0.503 | 0.074 | <u>IL1RN</u>     |
| 0.536 | 0.057 | <u>ILF2</u>     | 0.503 | 0.088 | <u>PDS5B</u>     |
| 0.620 | 0.143 | <u>HIG2</u>     | 0.556 | 0.142 | <u>OLFM1</u>     |
| 0.561 | 0.094 | <u>LGALS1</u>   | 0.548 | 0.137 | <u>GATA1</u>     |

|       |       |                 |       |       |                 |
|-------|-------|-----------------|-------|-------|-----------------|
| 0.522 | 0.059 | <u>STK39</u>    | 0.535 | 0.129 | <u>MGST1</u>    |
| 0.541 | 0.087 | <u>DIO2</u>     | 0.532 | 0.128 | <u>OLFML3</u>   |
| 0.568 | 0.115 | <u>RARB</u>     | 0.504 | 0.115 | <u>HMMR</u>     |
| 0.563 | 0.109 | <u>MAST4</u>    | 0.535 | 0.157 | <u>SLC4A11</u>  |
| 0.563 | 0.109 | <u>MSH5</u>     | 0.514 | 0.152 | <u>WT1</u>      |
| 0.563 | 0.109 | <u>TREX1</u>    | 0.525 | 0.162 | <u>TFF3</u>     |
| 0.581 | 0.130 | <u>SMARCC1</u>  | 0.509 | 0.148 | <u>CREB3L1</u>  |
| 0.551 | 0.104 | <u>RBM12</u>    | 0.509 | 0.148 | <u>RNASEL</u>   |
| 0.550 | 0.104 | <u>DSE</u>      | 0.525 | 0.169 | <u>KIAA0247</u> |
| 0.514 | 0.070 | <u>UBE2M</u>    | 0.511 | 0.165 | <u>PLK3</u>     |
| 0.538 | 0.094 | <u>LRP6</u>     | 0.515 | 0.185 | <u>GGH</u>      |
| 0.557 | 0.114 | <u>PPIH</u>     | 0.515 | 0.185 | <u>STMN1</u>    |
| 0.534 | 0.096 | <u>POC1A</u>    | 0.513 | 0.185 | <u>ABHD2</u>    |
| 0.540 | 0.110 | <u>TANC1</u>    | 0.526 | 0.199 | <u>IL10RB</u>   |
| 0.515 | 0.088 | <u>ARNT2</u>    | 0.511 | 0.187 | <u>AURKA</u>    |
| 0.541 | 0.116 | <u>COL5A2</u>   | 0.524 | 0.212 | <u>UBE2C</u>    |
| 0.616 | 0.191 | <u>TBC1D9</u>   |       |       |                 |
| 0.514 | 0.089 | <u>OSR2</u>     |       |       |                 |
| 0.564 | 0.141 | <u>NPM1</u>     |       |       |                 |
| 0.528 | 0.112 | <u>NDE1</u>     |       |       |                 |
| 0.514 | 0.109 | <u>SCAMP1</u>   |       |       |                 |
| 0.572 | 0.171 | <u>HIFX</u>     |       |       |                 |
| 0.526 | 0.130 | <u>HPS5</u>     |       |       |                 |
| 0.536 | 0.150 | <u>IVNS1ABP</u> |       |       |                 |
| 0.531 | 0.149 | <u>MAPK8</u>    |       |       |                 |
| 0.505 | 0.131 | <u>SYMPK</u>    |       |       |                 |
| 0.514 | 0.145 | <u>FKBP5</u>    |       |       |                 |
| 0.517 | 0.149 | <u>ACSL3</u>    |       |       |                 |
| 0.506 | 0.144 | <u>ABCA13</u>   |       |       |                 |
| 0.506 | 0.144 | <u>ABCC13</u>   |       |       |                 |
| 0.506 | 0.144 | <u>TMEM59L</u>  |       |       |                 |
| 0.548 | 0.198 | <u>WDR4</u>     |       |       |                 |
| 0.530 | 0.207 | <u>IKBKAP</u>   |       |       |                 |

### Protein based prediction result

| Pa    | Pi    | DownRegulation | Pa    | Pi    | UpRegulation |
|-------|-------|----------------|-------|-------|--------------|
| 0.586 | 0.154 | <u>PPARA</u>   | 0.596 | 0.095 | <u>CD83</u>  |
| 0.509 | 0.153 | <u>VIM</u>     |       |       |              |

### MCF7 based prediction result

| Pa    | Pi    | DownRegulation | Pa    | Pi    | UpRegulation    |
|-------|-------|----------------|-------|-------|-----------------|
| 0.793 | 0.021 | <u>FOXMI</u>   | 0.833 | 0.013 | <u>C11orf68</u> |
| 0.792 | 0.068 | <u>UBE2C</u>   | 0.810 | 0.029 | <u>CLDN9</u>    |
| 0.731 | 0.023 | <u>H2AFJ</u>   | 0.800 | 0.020 | <u>ZNF672</u>   |
| 0.705 | 0.015 | <u>BBS4</u>    | 0.796 | 0.037 | <u>CLCF1</u>    |

|       |       |                 |       |       |                 |
|-------|-------|-----------------|-------|-------|-----------------|
| 0.682 | 0.038 | <u>SUCO</u>     | 0.763 | 0.005 | <u>STRN</u>     |
| 0.686 | 0.042 | <u>SBF1</u>     | 0.767 | 0.015 | <u>CDKN1B</u>   |
| 0.668 | 0.029 | <u>C3orf52</u>  | 0.761 | 0.028 | <u>ABCB6</u>    |
| 0.627 | 0.012 | <u>ACVR2B</u>   | 0.759 | 0.033 | <u>BIN1</u>     |
| 0.627 | 0.012 | <u>BID</u>      | 0.747 | 0.028 | <u>CBR3</u>     |
| 0.627 | 0.012 | <u>ERGIC2</u>   | 0.724 | 0.020 | <u>RANGAP1</u>  |
| 0.634 | 0.024 | <u>MRPL34</u>   | 0.730 | 0.045 | <u>KIAA0232</u> |
| 0.618 | 0.038 | <u>FKBPL</u>    | 0.723 | 0.040 | <u>FOXC1</u>    |
| 0.617 | 0.038 | <u>SFN</u>      | 0.726 | 0.047 | <u>KIAA0430</u> |
| 0.632 | 0.054 | <u>KIF18B</u>   | 0.655 | 0.032 | <u>RAB3A</u>    |
| 0.582 | 0.020 | <u>LRIG1</u>    | 0.627 | 0.012 | <u>ALAD</u>     |
| 0.630 | 0.068 | <u>FZD2</u>     | 0.627 | 0.012 | <u>CLEC16A</u>  |
| 0.622 | 0.065 | <u>PLK1</u>     | 0.627 | 0.012 | <u>FBXL18</u>   |
| 0.605 | 0.055 | <u>ESPL1</u>    | 0.627 | 0.012 | <u>ZC2HC1A</u>  |
| 0.575 | 0.033 | <u>MAST4</u>    | 0.659 | 0.050 | <u>GPRC5C</u>   |
| 0.559 | 0.025 | <u>NEMF</u>     | 0.661 | 0.055 | <u>WISP2</u>    |
| 0.550 | 0.018 | <u>MREG</u>     | 0.615 | 0.011 | <u>MARCH8</u>   |
| 0.570 | 0.043 | <u>ZNF22</u>    | 0.615 | 0.011 | <u>WIP1</u>     |
| 0.557 | 0.030 | <u>FGFR2</u>    | 0.633 | 0.030 | <u>TRIM23</u>   |
| 0.575 | 0.054 | <u>OGFR</u>     | 0.614 | 0.014 | <u>PHLPP1</u>   |
| 0.581 | 0.062 | <u>NREP</u>     | 0.617 | 0.020 | <u>PIK3IP1</u>  |
| 0.564 | 0.046 | <u>METTL21B</u> | 0.624 | 0.031 | <u>LYPD3</u>    |
| 0.554 | 0.040 | <u>FAM111A</u>  | 0.701 | 0.126 | <u>PTMS</u>     |
| 0.540 | 0.026 | <u>SMCO4</u>    | 0.585 | 0.013 | <u>MTUS1</u>    |
| 0.553 | 0.042 | <u>TNS3</u>     | 0.584 | 0.012 | <u>ANGEL2</u>   |
| 0.592 | 0.082 | <u>ZNF85</u>    | 0.588 | 0.017 | <u>ANKZF1</u>   |
| 0.595 | 0.087 | <u>DEK</u>      | 0.598 | 0.029 | <u>SCAND2P</u>  |
| 0.565 | 0.059 | <u>PCBP1</u>    | 0.613 | 0.050 | <u>RAB40B</u>   |
| 0.534 | 0.029 | <u>HGSNAT</u>   | 0.593 | 0.034 | <u>GCLC</u>     |
| 0.551 | 0.049 | <u>CGGBP1</u>   | 0.585 | 0.027 | <u>ZNF200</u>   |
| 0.566 | 0.068 | <u>NFE2L3</u>   | 0.601 | 0.044 | <u>STX3</u>     |
| 0.578 | 0.080 | <u>ARL4C</u>    | 0.641 | 0.093 | <u>CHD3</u>     |
| 0.560 | 0.063 | <u>FLJ10038</u> | 0.585 | 0.038 | <u>CLIP1</u>    |
| 0.518 | 0.021 | <u>GMCL1</u>    | 0.566 | 0.020 | <u>ATXN7</u>    |
| 0.544 | 0.048 | <u>ALOX12P2</u> | 0.572 | 0.026 | <u>SORBS1</u>   |
| 0.574 | 0.082 | <u>TNNT1</u>    | 0.579 | 0.041 | <u>FBXL5</u>    |
| 0.568 | 0.076 | <u>PANK2</u>    | 0.546 | 0.017 | <u>CDS2</u>     |
| 0.546 | 0.057 | <u>CDKN2C</u>   | 0.593 | 0.067 | <u>SLC4A7</u>   |
| 0.562 | 0.075 | <u>HMMR</u>     | 0.555 | 0.029 | <u>NPL</u>      |
| 0.530 | 0.044 | <u>SPDL1</u>    | 0.563 | 0.042 | <u>MINOS1P1</u> |
| 0.533 | 0.049 | <u>FAM172A</u>  | 0.577 | 0.056 | <u>ZNF222</u>   |
| 0.526 | 0.042 | <u>APIAR</u>    | 0.616 | 0.098 | <u>BTG2</u>     |
| 0.548 | 0.065 | <u>KCNG1</u>    | 0.550 | 0.033 | <u>FBXO5</u>    |
| 0.530 | 0.049 | <u>ASUN</u>     | 0.533 | 0.018 | <u>SPR</u>      |
| 0.520 | 0.040 | <u>HEATR6</u>   | 0.530 | 0.017 | <u>PPP3CC</u>   |
| 0.529 | 0.052 | <u>THAP4</u>    | 0.545 | 0.032 | <u>PRNP</u>     |
| 0.514 | 0.038 | <u>MTSS1</u>    | 0.560 | 0.048 | <u>TFE3</u>     |

|       |       |                 |       |       |                  |
|-------|-------|-----------------|-------|-------|------------------|
| 0.512 | 0.037 | <u>NINL</u>     | 0.572 | 0.062 | <u>PIGA</u>      |
| 0.521 | 0.050 | <u>BCL2</u>     | 0.574 | 0.067 | <u>INTS6</u>     |
| 0.550 | 0.079 | <u>STC2</u>     | 0.560 | 0.053 | <u>GABARAPL1</u> |
| 0.520 | 0.051 | <u>DBP</u>      | 0.534 | 0.032 | <u>LINC00963</u> |
| 0.530 | 0.062 | <u>MMACHC</u>   | 0.559 | 0.057 | <u>VAMP2</u>     |
| 0.520 | 0.052 | <u>URB2</u>     | 0.551 | 0.049 | <u>SRGAP3</u>    |
| 0.512 | 0.046 | <u>CD3EAP</u>   | 0.546 | 0.046 | <u>ZFAND5</u>    |
| 0.509 | 0.045 | <u>ACOX3</u>    | 0.549 | 0.050 | <u>NIPBL</u>     |
| 0.557 | 0.093 | <u>CYP26A1</u>  | 0.592 | 0.093 | <u>IFIT2</u>     |
| 0.514 | 0.050 | <u>THG1L</u>    | 0.593 | 0.097 | <u>ZFP36L1</u>   |
| 0.511 | 0.049 | <u>NAT1</u>     | 0.529 | 0.034 | <u>PPP3R1</u>    |
| 0.546 | 0.085 | <u>MARCH8</u>   | 0.522 | 0.028 | <u>LSM14A</u>    |
| 0.530 | 0.070 | <u>MAGEF1</u>   | 0.537 | 0.045 | <u>STK17A</u>    |
| 0.511 | 0.055 | <u>RIBC2</u>    | 0.582 | 0.095 | <u>PGM1</u>      |
| 0.502 | 0.046 | <u>FAM134A</u>  | 0.549 | 0.062 | <u>DNAJB2</u>    |
| 0.545 | 0.091 | <u>RERE</u>     | 0.540 | 0.057 | <u>PROCR</u>     |
| 0.512 | 0.060 | <u>ARMCX1</u>   | 0.517 | 0.034 | <u>COQ10B</u>    |
| 0.503 | 0.051 | <u>MYD88</u>    | 0.539 | 0.057 | <u>SCYL3</u>     |
| 0.520 | 0.069 | <u>KIAA0125</u> | 0.526 | 0.044 | <u>OSR2</u>      |
| 0.502 | 0.051 | <u>TRAF3IP2</u> | 0.581 | 0.102 | <u>CC2D1A</u>    |
| 0.512 | 0.062 | <u>JADE2</u>    | 0.523 | 0.045 | <u>TCEB3-AS1</u> |
| 0.503 | 0.053 | <u>DBF4</u>     | 0.513 | 0.035 | <u>MTMR9</u>     |
| 0.505 | 0.056 | <u>HSPBAP1</u>  | 0.508 | 0.032 | <u>KDM6A</u>     |
| 0.515 | 0.069 | <u>FUT4</u>     | 0.518 | 0.044 | <u>ZNF654</u>    |
| 0.510 | 0.067 | <u>PDZK1</u>    | 0.535 | 0.061 | <u>SPAG9</u>     |
| 0.507 | 0.066 | <u>UMPS</u>     | 0.537 | 0.064 | <u>HEG1</u>      |
| 0.523 | 0.082 | <u>PSMD12</u>   | 0.502 | 0.029 | <u>ZHX2</u>      |
| 0.529 | 0.088 | <u>PRRC1</u>    | 0.502 | 0.029 | <u>PTPN21</u>    |
| 0.530 | 0.093 | <u>ZC3HAV1</u>  | 0.549 | 0.077 | <u>ZNF217</u>    |
| 0.533 | 0.103 | <u>PUS3</u>     | 0.508 | 0.038 | <u>SAMD4A</u>    |
| 0.562 | 0.134 | <u>GTSE1</u>    | 0.539 | 0.069 | <u>ATG12</u>     |
| 0.512 | 0.085 | <u>ZC3H13</u>   | 0.507 | 0.041 | <u>HIST1H4H</u>  |
| 0.503 | 0.078 | <u>ARHGEF3</u>  | 0.517 | 0.054 | <u>PSG9</u>      |
| 0.547 | 0.123 | <u>PTPN18</u>   | 0.521 | 0.058 | <u>DIP2C</u>     |
| 0.518 | 0.096 | <u>SIDT1</u>    | 0.569 | 0.109 | <u>BNIP3L</u>    |
| 0.561 | 0.140 | <u>SFSWAP</u>   | 0.509 | 0.051 | <u>MAP3K14</u>   |
| 0.524 | 0.104 | <u>SEC22A</u>   | 0.508 | 0.051 | <u>RGS17</u>     |
| 0.507 | 0.091 | <u>TCAF1</u>    | 0.529 | 0.072 | <u>HIST2H2BE</u> |
| 0.514 | 0.099 | <u>USP46</u>    | 0.510 | 0.055 | <u>WDR47</u>     |
| 0.523 | 0.111 | <u>MYBL1</u>    | 0.516 | 0.064 | <u>ZNF211</u>    |
| 0.504 | 0.096 | <u>PIK3R1</u>   | 0.534 | 0.082 | <u>ID3</u>       |
| 0.527 | 0.120 | <u>AURKA</u>    | 0.512 | 0.062 | <u>TNFAIP2</u>   |
| 0.510 | 0.110 | <u>CHAF1A</u>   | 0.511 | 0.063 | <u>NR4A1</u>     |
| 0.514 | 0.121 | <u>TGS1</u>     | 0.539 | 0.092 | <u>CSRP2</u>     |
| 0.560 | 0.169 | <u>C2CD2</u>    | 0.511 | 0.064 | <u>LDLR</u>      |
| 0.503 | 0.116 | <u>ADRA2C</u>   | 0.543 | 0.097 | <u>KCTD5</u>     |
| 0.511 | 0.125 | <u>CPTP</u>     | 0.519 | 0.073 | <u>NCLN</u>      |

|       |       |                |       |       |                |
|-------|-------|----------------|-------|-------|----------------|
| 0.541 | 0.155 | <u>FAM208B</u> | 0.502 | 0.057 | <u>EFNA1</u>   |
| 0.511 | 0.172 | <u>RNF4</u>    | 0.519 | 0.076 | <u>ADM</u>     |
|       |       |                | 0.526 | 0.083 | <u>HMOX1</u>   |
|       |       |                | 0.534 | 0.098 | <u>SNHG17</u>  |
|       |       |                | 0.502 | 0.067 | <u>MCL1</u>    |
|       |       |                | 0.548 | 0.120 | <u>FOSL1</u>   |
|       |       |                | 0.526 | 0.099 | <u>NKX3-1</u>  |
|       |       |                | 0.584 | 0.158 | <u>KLF2</u>    |
|       |       |                | 0.515 | 0.091 | <u>PBXIP1</u>  |
|       |       |                | 0.513 | 0.096 | <u>NFKBIB</u>  |
|       |       |                | 0.542 | 0.128 | <u>DUSP1</u>   |
|       |       |                | 0.577 | 0.163 | <u>MSRB2</u>   |
|       |       |                | 0.533 | 0.121 | <u>KLF10</u>   |
|       |       |                | 0.505 | 0.094 | <u>ELF3</u>    |
|       |       |                | 0.522 | 0.115 | <u>IER5</u>    |
|       |       |                | 0.547 | 0.144 | <u>PLA2G3</u>  |
|       |       |                | 0.502 | 0.100 | <u>MSANTD2</u> |
|       |       |                | 0.523 | 0.122 | <u>IFIT5</u>   |
|       |       |                | 0.502 | 0.109 | <u>BHLHE40</u> |

#### VCAP\_6h based prediction result

| Pa    | Pi    | DownRegulation    | Pa    | Pi    | UpRegulation   |
|-------|-------|-------------------|-------|-------|----------------|
| 0.855 | 0.024 | <u>ZNF221</u>     | 0.841 | 0.030 | <u>SCMH1</u>   |
| 0.819 | 0.044 | <u>CACNA1B</u>    | 0.816 | 0.048 | <u>SLC38A2</u> |
| 0.801 | 0.048 | <u>SLC12A6</u>    | 0.813 | 0.052 | <u>AKIP1</u>   |
| 0.792 | 0.052 | <u>KCNC2</u>      | 0.758 | 0.040 | <u>MIS12</u>   |
| 0.778 | 0.051 | <u>NPLOC4</u>     | 0.781 | 0.084 | <u>BCS1L</u>   |
| 0.769 | 0.046 | <u>DYNC1H1</u>    | 0.750 | 0.062 | <u>SP3</u>     |
| 0.770 | 0.057 | <u>BACH2</u>      | 0.789 | 0.104 | <u>SMG5</u>    |
| 0.723 | 0.017 | <u>HP</u>         | 0.742 | 0.065 | <u>KPNA2</u>   |
| 0.767 | 0.069 | <u>C10ORF68</u>   | 0.749 | 0.083 | <u>SNRPB2</u>  |
| 0.749 | 0.060 | <u>CPM</u>        | 0.745 | 0.080 | <u>MRPL4</u>   |
| 0.770 | 0.086 | <u>LRRC8E</u>     | 0.702 | 0.048 | <u>UNC50</u>   |
| 0.762 | 0.081 | <u>ADM</u>        | 0.730 | 0.081 | <u>ZDHHC4</u>  |
| 0.724 | 0.055 | <u>PCYOX1</u>     | 0.723 | 0.080 | <u>WDR74</u>   |
| 0.734 | 0.066 | <u>CXORF56</u>    | 0.672 | 0.030 | <u>CBR3</u>    |
| 0.722 | 0.057 | <u>KANK2</u>      | 0.737 | 0.099 | <u>TIMM9</u>   |
| 0.715 | 0.052 | <u>HIBCH</u>      | 0.730 | 0.094 | <u>HGSNAT</u>  |
| 0.746 | 0.091 | <u>ASTN1</u>      | 0.716 | 0.087 | <u>SNX17</u>   |
| 0.736 | 0.081 | <u>LASP1</u>      | 0.701 | 0.074 | <u>PALLD</u>   |
| 0.750 | 0.096 | <u>CLDN7</u>      | 0.687 | 0.065 | <u>ISOC1</u>   |
| 0.737 | 0.085 | <u>ZNF23</u>      | 0.699 | 0.082 | <u>RAB9A</u>   |
| 0.686 | 0.034 | <u>CENPC1</u>     | 0.674 | 0.065 | <u>MRPL48</u>  |
| 0.749 | 0.098 | <u>MGC12488</u>   | 0.677 | 0.069 | <u>PCTP</u>    |
| 0.729 | 0.080 | <u>KIAA0664L3</u> | 0.686 | 0.085 | <u>ACVR2A</u>  |

|       |       |                  |       |       |                 |
|-------|-------|------------------|-------|-------|-----------------|
| 0.734 | 0.087 | <u>CLCN2</u>     | 0.685 | 0.086 | <u>FUBP3</u>    |
| 0.743 | 0.099 | <u>SPIN1</u>     | 0.690 | 0.093 | <u>NDUFS3</u>   |
| 0.698 | 0.060 | <u>SNIP1</u>     | 0.688 | 0.096 | <u>CTSK</u>     |
| 0.704 | 0.073 | <u>GTF2H2B</u>   | 0.675 | 0.087 | <u>PDCD10</u>   |
| 0.670 | 0.042 | <u>C20ORF46</u>  | 0.679 | 0.091 | <u>CTCF</u>     |
| 0.711 | 0.092 | <u>SLC6A4</u>    | 0.691 | 0.118 | <u>BABAM1</u>   |
| 0.700 | 0.091 | <u>DSC3</u>      | 0.648 | 0.075 | <u>TXN2</u>     |
| 0.660 | 0.052 | <u>ROBO4</u>     | 0.637 | 0.065 | <u>DNAJC7</u>   |
| 0.690 | 0.083 | <u>OASL</u>      | 0.637 | 0.066 | <u>FAM59A</u>   |
| 0.662 | 0.055 | <u>GABRA2</u>    | 0.642 | 0.071 | <u>BFAR</u>     |
| 0.672 | 0.070 | <u>PRR5L</u>     | 0.632 | 0.067 | <u>ZNF580</u>   |
| 0.697 | 0.101 | <u>ACSL4</u>     | 0.633 | 0.069 | <u>NCAPD3</u>   |
| 0.702 | 0.106 | <u>TMOD3</u>     | 0.637 | 0.074 | <u>POLE3</u>    |
| 0.683 | 0.088 | <u>LOC646934</u> | 0.671 | 0.109 | <u>RAD23A</u>   |
| 0.678 | 0.086 | <u>CXXC1</u>     | 0.697 | 0.138 | <u>CAD</u>      |
| 0.690 | 0.098 | <u>ST8SIA1</u>   | 0.637 | 0.079 | <u>TACC2</u>    |
| 0.657 | 0.066 | <u>HSPB2</u>     | 0.637 | 0.084 | <u>MFAP1</u>    |
| 0.744 | 0.156 | <u>DCAF17</u>    | 0.628 | 0.075 | <u>NSMCE4A</u>  |
| 0.676 | 0.091 | <u>PCP4</u>      | 0.635 | 0.082 | <u>DHX32</u>    |
| 0.681 | 0.096 | <u>TSPYL4</u>    | 0.613 | 0.061 | <u>TOR3A</u>    |
| 0.645 | 0.060 | <u>KAZALD1</u>   | 0.658 | 0.106 | <u>MDK</u>      |
| 0.710 | 0.125 | <u>PFN2</u>      | 0.702 | 0.153 | <u>MCAT</u>     |
| 0.667 | 0.084 | <u>C3</u>        | 0.626 | 0.078 | <u>MRPL24</u>   |
| 0.657 | 0.075 | <u>ABCC5</u>     | 0.647 | 0.101 | <u>FANCG</u>    |
| 0.689 | 0.107 | <u>KLKB1</u>     | 0.642 | 0.097 | <u>PCID2</u>    |
| 0.656 | 0.076 | <u>FXC1</u>      | 0.653 | 0.117 | <u>MMP7</u>     |
| 0.671 | 0.092 | <u>FAM46C</u>    | 0.657 | 0.122 | <u>TGDS</u>     |
| 0.633 | 0.055 | <u>HIST1H1D</u>  | 0.647 | 0.115 | <u>KIAA1324</u> |
| 0.671 | 0.096 | <u>MGLL</u>      | 0.602 | 0.074 | <u>HDHD1</u>    |
| 0.686 | 0.112 | <u>MAGEA11</u>   | 0.663 | 0.136 | <u>PRMT1</u>    |
| 0.658 | 0.085 | <u>MYOC</u>      | 0.656 | 0.131 | <u>HNRNPA0</u>  |
| 0.708 | 0.135 | <u>COL6A3</u>    | 0.620 | 0.096 | <u>TDRD7</u>    |
| 0.670 | 0.098 | <u>GFRA2</u>     | 0.633 | 0.111 | <u>GPATCH2</u>  |
| 0.658 | 0.087 | <u>LHPP</u>      | 0.601 | 0.081 | <u>SCO2</u>     |
| 0.642 | 0.074 | <u>SERPINI1</u>  | 0.648 | 0.128 | <u>MRPL35</u>   |
| 0.633 | 0.067 | <u>HIVEP3</u>    | 0.581 | 0.063 | <u>CNNM4</u>    |
| 0.625 | 0.060 | <u>LIPC</u>      | 0.606 | 0.090 | <u>GUCY1A3</u>  |
| 0.689 | 0.124 | <u>FRG1</u>      | 0.649 | 0.134 | <u>PSMD7</u>    |
| 0.657 | 0.092 | <u>ABCA12</u>    | 0.543 | 0.028 | <u>ABCF3</u>    |
| 0.604 | 0.040 | <u>SH3BP1</u>    | 0.599 | 0.085 | <u>PTPN9</u>    |
| 0.638 | 0.074 | <u>COMMD3</u>    | 0.613 | 0.100 | <u>ALAS1</u>    |
| 0.645 | 0.082 | <u>ADH7</u>      | 0.633 | 0.123 | <u>TMEM123</u>  |
| 0.672 | 0.111 | <u>TGM3</u>      | 0.569 | 0.064 | <u>LIMA1</u>    |
| 0.627 | 0.070 | <u>UPF2</u>      | 0.610 | 0.109 | <u>RAP1B</u>    |
| 0.623 | 0.069 | <u>TLR2</u>      | 0.611 | 0.112 | <u>STRN4</u>    |
| 0.620 | 0.067 | <u>TPP1</u>      | 0.654 | 0.156 | <u>SSRP1</u>    |
| 0.656 | 0.103 | <u>C1ORF114</u>  | 0.618 | 0.119 | <u>TMEM93</u>   |

|       |       |                 |       |       |                 |
|-------|-------|-----------------|-------|-------|-----------------|
| 0.623 | 0.071 | <u>KIAA0485</u> | 0.584 | 0.087 | <u>NTHL1</u>    |
| 0.631 | 0.080 | <u>EPHB2</u>    | 0.612 | 0.116 | <u>RSAD2</u>    |
| 0.621 | 0.070 | <u>TCOF1</u>    | 0.592 | 0.097 | <u>IRX4</u>     |
| 0.665 | 0.118 | <u>CETP</u>     | 0.598 | 0.103 | <u>TIMM44</u>   |
| 0.654 | 0.108 | <u>TMEM30B</u>  | 0.653 | 0.159 | <u>ETFA</u>     |
| 0.605 | 0.060 | <u>CEACAM8</u>  | 0.587 | 0.093 | <u>UOCRFS1</u>  |
| 0.694 | 0.153 | <u>EBF2</u>     | 0.565 | 0.071 | <u>DHCR24</u>   |
| 0.665 | 0.124 | <u>SELL</u>     | 0.549 | 0.056 | <u>DLD</u>      |
| 0.627 | 0.088 | <u>STX7</u>     | 0.635 | 0.143 | <u>C1ORF216</u> |
| 0.655 | 0.116 | <u>APOBEC3G</u> | 0.584 | 0.094 | <u>COQ9</u>     |
| 0.656 | 0.118 | <u>ECHDC3</u>   | 0.568 | 0.079 | <u>TMSB15A</u>  |
| 0.674 | 0.136 | <u>APOBEC3C</u> | 0.599 | 0.113 | <u>CENPA</u>    |
| 0.631 | 0.094 | <u>ICAM4</u>    | 0.618 | 0.133 | <u>PODXL2</u>   |
| 0.614 | 0.077 | <u>ULBP2</u>    | 0.600 | 0.118 | <u>FJX1</u>     |
| 0.632 | 0.097 | <u>KPNA5</u>    | 0.569 | 0.089 | <u>LAP3</u>     |
| 0.663 | 0.129 | <u>LRRC6</u>    | 0.631 | 0.152 | <u>USP21</u>    |
| 0.612 | 0.078 | <u>DNMT3B</u>   | 0.573 | 0.095 | <u>MX1</u>      |
| 0.598 | 0.065 | <u>DDX43</u>    | 0.577 | 0.100 | <u>AUH</u>      |
| 0.637 | 0.105 | <u>INSL4</u>    | 0.567 | 0.091 | <u>SH3GLB2</u>  |
| 0.630 | 0.097 | <u>KRT5</u>     | 0.571 | 0.095 | <u>CEP70</u>    |
| 0.614 | 0.082 | <u>TLR8</u>     | 0.559 | 0.084 | <u>RHBDF1</u>   |
| 0.615 | 0.084 | <u>CGREF1</u>   | 0.588 | 0.115 | <u>GREM1</u>    |
| 0.601 | 0.075 | <u>WNT11</u>    | 0.614 | 0.142 | <u>NCAPH</u>    |
| 0.640 | 0.116 | <u>KIF13B</u>   | 0.570 | 0.100 | <u>GBAS</u>     |
| 0.596 | 0.075 | <u>RPL11</u>    | 0.588 | 0.119 | <u>DPYSL2</u>   |
| 0.608 | 0.087 | <u>RDH16</u>    | 0.596 | 0.127 | <u>TAF11</u>    |
| 0.624 | 0.104 | <u>ATAT1</u>    | 0.545 | 0.076 | <u>ASS1</u>     |
| 0.588 | 0.071 | <u>LTBP2</u>    | 0.548 | 0.080 | <u>RAD21</u>    |
| 0.581 | 0.066 | <u>BAGE</u>     | 0.606 | 0.139 | <u>CCT5</u>     |
| 0.615 | 0.102 | <u>GABRB3</u>   | 0.558 | 0.093 | <u>FCER1A</u>   |
| 0.622 | 0.108 | <u>BMPR2</u>    | 0.589 | 0.125 | <u>G6PD</u>     |
| 0.587 | 0.073 | <u>APOM</u>     | 0.521 | 0.058 | <u>IQGAP1</u>   |
| 0.586 | 0.073 | <u>LRIG1</u>    | 0.554 | 0.093 | <u>OIP5</u>     |
| 0.619 | 0.109 | <u>LHX2</u>     | 0.565 | 0.107 | <u>RAB4A</u>    |
| 0.652 | 0.142 | <u>FAM168A</u>  | 0.569 | 0.111 | <u>TNFAIP8</u>  |
| 0.601 | 0.092 | <u>IQGAP2</u>   | 0.589 | 0.131 | <u>FBXL6</u>    |
| 0.659 | 0.150 | <u>SERPINB7</u> | 0.549 | 0.092 | <u>XAF1</u>     |
| 0.658 | 0.150 | <u>AZU1</u>     | 0.589 | 0.132 | <u>ZNF12</u>    |
| 0.622 | 0.116 | <u>ATP1B3</u>   | 0.549 | 0.093 | <u>SCFD1</u>    |
| 0.602 | 0.097 | <u>HYAL3</u>    | 0.539 | 0.083 | <u>ADCY7</u>    |
| 0.609 | 0.103 | <u>MEG3</u>     | 0.582 | 0.126 | <u>DERL1</u>    |
| 0.637 | 0.133 | <u>SYNPO</u>    | 0.560 | 0.105 | <u>UBE2Q1</u>   |
| 0.577 | 0.072 | <u>DUSP2</u>    | 0.542 | 0.087 | <u>LSR</u>      |
| 0.587 | 0.083 | <u>UNC93B1</u>  | 0.597 | 0.144 | <u>UBXN8</u>    |
| 0.639 | 0.135 | <u>C4ORF29</u>  | 0.572 | 0.120 | <u>FASTKD1</u>  |
| 0.618 | 0.115 | <u>ODF1</u>     | 0.557 | 0.107 | <u>FAM193B</u>  |
| 0.653 | 0.151 | <u>LAMA5</u>    | 0.529 | 0.081 | <u>OAS3</u>     |

|       |       |                  |       |       |                 |
|-------|-------|------------------|-------|-------|-----------------|
| 0.605 | 0.103 | <u>SLIT2</u>     | 0.546 | 0.100 | <u>PTPRE</u>    |
| 0.599 | 0.097 | <u>ZXDC</u>      | 0.543 | 0.096 | <u>HSD17B6</u>  |
| 0.581 | 0.081 | <u>FZD8</u>      | 0.596 | 0.151 | <u>ILF2</u>     |
| 0.590 | 0.091 | <u>PER2</u>      | 0.556 | 0.112 | <u>RABGGTA</u>  |
| 0.606 | 0.107 | <u>DDX6</u>      | 0.563 | 0.120 | <u>RDBP</u>     |
| 0.591 | 0.091 | <u>CTSL2</u>     | 0.616 | 0.174 | <u>ECSIT</u>    |
| 0.620 | 0.121 | <u>UTY</u>       | 0.536 | 0.094 | <u>CLP1</u>     |
| 0.612 | 0.113 | <u>POLQ</u>      | 0.530 | 0.089 | <u>PIK3CA</u>   |
| 0.630 | 0.131 | <u>CORO1C</u>    | 0.581 | 0.140 | <u>KIAA0101</u> |
| 0.588 | 0.091 | <u>SLPI</u>      | 0.570 | 0.130 | <u>GATAD2A</u>  |
| 0.645 | 0.147 | <u>PTH1R</u>     | 0.543 | 0.104 | <u>TGFB1</u>    |
| 0.576 | 0.079 | <u>USP14</u>     | 0.579 | 0.141 | <u>TIMM13</u>   |
| 0.577 | 0.082 | <u>TWF2</u>      | 0.569 | 0.132 | <u>MTMR2</u>    |
| 0.646 | 0.151 | <u>CRYGD</u>     | 0.533 | 0.096 | <u>GRB7</u>     |
| 0.569 | 0.074 | <u>WIPF2</u>     | 0.540 | 0.104 | <u>HNRNPC</u>   |
| 0.683 | 0.188 | <u>SERPIND1</u>  | 0.536 | 0.102 | <u>IL10RB</u>   |
| 0.565 | 0.071 | <u>POLR3D</u>    | 0.541 | 0.107 | <u>IFI44L</u>   |
| 0.610 | 0.115 | <u>ATP5J</u>     | 0.531 | 0.098 | <u>VPS37C</u>   |
| 0.575 | 0.082 | <u>TFCP2L1</u>   | 0.510 | 0.077 | <u>PUF60</u>    |
| 0.577 | 0.085 | <u>FMNL1</u>     | 0.578 | 0.146 | <u>GALNS</u>    |
| 0.571 | 0.079 | <u>PLTP</u>      | 0.575 | 0.143 | <u>MRPL16</u>   |
| 0.565 | 0.073 | <u>DUX1</u>      | 0.569 | 0.138 | <u>BET1</u>     |
| 0.611 | 0.120 | <u>PURA</u>      | 0.503 | 0.075 | <u>ATP11B</u>   |
| 0.589 | 0.098 | <u>LEF1</u>      | 0.597 | 0.172 | <u>PTGES2</u>   |
| 0.598 | 0.108 | <u>FAH</u>       | 0.531 | 0.107 | <u>SERPINH1</u> |
| 0.604 | 0.113 | <u>OXT</u>       | 0.525 | 0.102 | <u>IFIT3</u>    |
| 0.633 | 0.143 | <u>C11ORF16</u>  | 0.522 | 0.101 | <u>STAG2</u>    |
| 0.590 | 0.100 | <u>MIS18BP1</u>  | 0.533 | 0.114 | <u>IFIT1</u>    |
| 0.579 | 0.090 | <u>PLA2G2D</u>   | 0.554 | 0.136 | <u>ARPP21</u>   |
| 0.568 | 0.079 | <u>KIAA0754</u>  | 0.540 | 0.123 | <u>MTCP1NB</u>  |
| 0.607 | 0.118 | <u>SSR3</u>      | 0.544 | 0.127 | <u>KIAA1598</u> |
| 0.546 | 0.058 | <u>PSG7</u>      | 0.516 | 0.099 | <u>TBPL1</u>    |
| 0.570 | 0.082 | <u>KDSR</u>      | 0.553 | 0.137 | <u>RAB32</u>    |
| 0.572 | 0.085 | <u>NKX2-2</u>    | 0.514 | 0.101 | <u>NUSAP1</u>   |
| 0.583 | 0.095 | <u>ZNF711</u>    | 0.540 | 0.126 | <u>GPD1L</u>    |
| 0.597 | 0.110 | <u>CYBRD1</u>    | 0.546 | 0.132 | <u>SLC29A3</u>  |
| 0.600 | 0.113 | <u>EIF4H</u>     | 0.553 | 0.140 | <u>ADAR</u>     |
| 0.595 | 0.109 | <u>PKNOX1</u>    | 0.517 | 0.107 | <u>POLE2</u>    |
| 0.634 | 0.148 | <u>MRPL24</u>    | 0.537 | 0.129 | <u>C1QTNF1</u>  |
| 0.559 | 0.074 | <u>RAB11FIP1</u> | 0.574 | 0.167 | <u>PRC1</u>     |
| 0.609 | 0.125 | <u>CPEB3</u>     | 0.521 | 0.115 | <u>XKR8</u>     |
| 0.540 | 0.056 | <u>FPGS</u>      | 0.532 | 0.127 | <u>FAM110B</u>  |
| 0.565 | 0.081 | <u>SLC13A2</u>   | 0.549 | 0.145 | <u>ANXA2</u>    |
| 0.566 | 0.084 | <u>PEX13</u>     | 0.578 | 0.174 | <u>NQO2</u>     |
| 0.605 | 0.123 | <u>FYB</u>       | 0.553 | 0.150 | <u>AKR7A3</u>   |
| 0.567 | 0.086 | <u>ZNF473</u>    | 0.524 | 0.121 | <u>DIEXF</u>    |
| 0.548 | 0.068 | <u>KLRC3</u>     | 0.530 | 0.127 | <u>NDUFB3</u>   |

|       |       |                 |       |       |                 |
|-------|-------|-----------------|-------|-------|-----------------|
| 0.551 | 0.071 | <u>CD244</u>    | 0.551 | 0.148 | <u>TRAPPC2L</u> |
| 0.596 | 0.117 | <u>PFKP</u>     | 0.587 | 0.187 | <u>UNG</u>      |
| 0.584 | 0.105 | <u>MBD5</u>     | 0.531 | 0.132 | <u>FAAH</u>     |
| 0.552 | 0.074 | <u>MPV17</u>    | 0.502 | 0.103 | <u>PTPRC</u>    |
| 0.598 | 0.119 | <u>ERLIN2</u>   | 0.520 | 0.123 | <u>FAM127B</u>  |
| 0.600 | 0.122 | <u>HCP5</u>     | 0.532 | 0.135 | <u>TRIP4</u>    |
| 0.601 | 0.124 | <u>NUBP1</u>    | 0.512 | 0.118 | <u>LAMTOR2</u>  |
| 0.637 | 0.162 | <u>HOOK1</u>    | 0.535 | 0.142 | <u>COPZ1</u>    |
| 0.587 | 0.112 | <u>MALL</u>     | 0.530 | 0.138 | <u>DDX54</u>    |
| 0.560 | 0.086 | <u>HLA-DMB</u>  | 0.512 | 0.122 | <u>MCM6</u>     |
| 0.637 | 0.163 | <u>ZNF556</u>   | 0.517 | 0.130 | <u>TPM4</u>     |
| 0.594 | 0.121 | <u>PAQR6</u>    | 0.549 | 0.164 | <u>YARS2</u>    |
| 0.580 | 0.106 | <u>PDK4</u>     | 0.512 | 0.128 | <u>GTF3C1</u>   |
| 0.617 | 0.144 | <u>RAMP3</u>    | 0.563 | 0.180 | <u>GABRP</u>    |
| 0.595 | 0.122 | <u>LGSN</u>     | 0.528 | 0.146 | <u>CLEC4A</u>   |
| 0.568 | 0.095 | <u>SLC26A6</u>  | 0.542 | 0.162 | <u>GMEB2</u>    |
| 0.597 | 0.125 | <u>STOM</u>     | 0.524 | 0.144 | <u>SLCO4A1</u>  |
| 0.535 | 0.063 | <u>SERPINC1</u> | 0.519 | 0.140 | <u>MSH2</u>     |
| 0.611 | 0.140 | <u>CD247</u>    | 0.529 | 0.149 | <u>CLK3</u>     |
| 0.511 | 0.039 | <u>FOXN2</u>    | 0.541 | 0.162 | <u>DCTPP1</u>   |
| 0.598 | 0.128 | <u>P2RY13</u>   | 0.519 | 0.140 | <u>UQCRC2</u>   |
| 0.591 | 0.121 | <u>VAV3</u>     | 0.521 | 0.142 | <u>SPDEF</u>    |
| 0.606 | 0.137 | <u>KCNK15</u>   | 0.505 | 0.127 | <u>PEX2</u>     |
| 0.554 | 0.085 | <u>CRTAM</u>    | 0.513 | 0.136 | <u>TMED9</u>    |
| 0.554 | 0.085 | <u>PER3</u>     | 0.556 | 0.179 | <u>SPECC1L</u>  |
| 0.552 | 0.085 | <u>B2M</u>      | 0.509 | 0.133 | <u>PSMA6</u>    |
| 0.586 | 0.120 | <u>ASH2L</u>    | 0.533 | 0.158 | <u>BLOC1S1</u>  |
| 0.552 | 0.087 | <u>INPP5B</u>   | 0.527 | 0.152 | <u>TSR1</u>     |
| 0.547 | 0.082 | <u>NOP56</u>    | 0.523 | 0.149 | <u>ARHGEF5</u>  |
| 0.538 | 0.074 | <u>LPA</u>      | 0.515 | 0.140 | <u>UBE2D3</u>   |
| 0.535 | 0.072 | <u>GLI3</u>     | 0.504 | 0.131 | <u>TEAD4</u>    |
| 0.612 | 0.149 | <u>CCL18</u>    | 0.507 | 0.135 | <u>NIF3L1</u>   |
| 0.612 | 0.149 | <u>FNDC3B</u>   | 0.532 | 0.160 | <u>VASP</u>     |
| 0.577 | 0.115 | <u>FIP1L1</u>   | 0.524 | 0.156 | <u>RAP2C</u>    |
| 0.583 | 0.121 | LOC399904       | 0.527 | 0.162 | <u>POLD2</u>    |
| 0.586 | 0.124 | <u>ASAP3</u>    | 0.553 | 0.191 | <u>TIMM10</u>   |
| 0.602 | 0.141 | <u>CCR6</u>     | 0.506 | 0.146 | <u>CCDC51</u>   |
| 0.560 | 0.100 | <u>LRMP</u>     | 0.554 | 0.195 | <u>C19ORF60</u> |
| 0.582 | 0.123 | LOC220594       | 0.509 | 0.150 | <u>IFI6</u>     |
| 0.550 | 0.091 | <u>TEAD1</u>    | 0.531 | 0.172 | <u>LRRC47</u>   |
| 0.613 | 0.155 | <u>KCNS3</u>    | 0.519 | 0.161 | <u>NKRF</u>     |
| 0.551 | 0.095 | <u>MLF1</u>     | 0.501 | 0.149 | <u>TM4SF1</u>   |
| 0.510 | 0.054 | <u>CYP4F2</u>   | 0.523 | 0.171 | <u>CNOT6</u>    |
| 0.562 | 0.106 | <u>RPS3</u>     | 0.520 | 0.168 | <u>INTS7</u>    |
| 0.543 | 0.088 | <u>MXD1</u>     | 0.503 | 0.152 | <u>BBS4</u>     |
| 0.546 | 0.090 | <u>PGM1</u>     | 0.537 | 0.188 | <u>SDHAP1</u>   |
| 0.553 | 0.098 | <u>CTSW</u>     | 0.528 | 0.179 | <u>TNFRSF1A</u> |

|       |       |              |       |       |          |
|-------|-------|--------------|-------|-------|----------|
| 0.563 | 0.108 | ZNF552       | 0.535 | 0.186 | AKR1A1   |
| 0.546 | 0.091 | NAV2         | 0.530 | 0.184 | HDGF     |
| 0.579 | 0.126 | SCYL2        | 0.501 | 0.157 | WAC      |
| 0.566 | 0.114 | REPS2        | 0.519 | 0.175 | PRPSAP2  |
| 0.568 | 0.116 | TBCC         | 0.539 | 0.197 | PLEKHM2  |
| 0.553 | 0.101 | PAK3         | 0.536 | 0.196 | CHI3L2   |
| 0.613 | 0.162 | HHAT         | 0.530 | 0.190 | MMD      |
| 0.589 | 0.138 | WDR52        | 0.525 | 0.187 | CCDC109B |
| 0.566 | 0.116 | NADSYN1      | 0.506 | 0.168 | AES      |
| 0.552 | 0.102 | GABPA        | 0.508 | 0.172 | ZFP36L2  |
| 0.568 | 0.118 | TLK1         | 0.502 | 0.168 | CERS6    |
| 0.529 | 0.081 | AFF4         | 0.512 | 0.184 | DAD1     |
| 0.516 | 0.068 | ZNF835       | 0.516 | 0.190 | SUMO2    |
| 0.579 | 0.131 | COL7A1       | 0.520 | 0.197 | OLA1     |
| 0.568 | 0.120 | HBQ1         | 0.505 | 0.187 | MCM7     |
| 0.549 | 0.102 | CALU         | 0.517 | 0.206 | RWDD2A   |
| 0.560 | 0.113 | ZNF516       | 0.519 | 0.209 | CYC1     |
| 0.589 | 0.142 | ZMYM5        | 0.504 | 0.196 | DOCK1    |
| 0.573 | 0.126 | MUC16        | 0.508 | 0.201 | MOSCI    |
| 0.509 | 0.063 | NRG2         |       |       |          |
| 0.577 | 0.131 | KRT3         |       |       |          |
| 0.578 | 0.133 | HAND1        |       |       |          |
| 0.576 | 0.131 | LOC100127972 |       |       |          |
| 0.585 | 0.140 | TMEM140      |       |       |          |
| 0.535 | 0.090 | SNAPC1       |       |       |          |
| 0.516 | 0.072 | CRYGC        |       |       |          |
| 0.599 | 0.156 | MAGEA6       |       |       |          |
| 0.578 | 0.136 | TMEM50B      |       |       |          |
| 0.502 | 0.061 | CLIC3        |       |       |          |
| 0.516 | 0.075 | FRK          |       |       |          |
| 0.560 | 0.119 | PAAF1        |       |       |          |
| 0.520 | 0.079 | SNORA21      |       |       |          |
| 0.573 | 0.133 | MSN          |       |       |          |
| 0.549 | 0.109 | PPWD1        |       |       |          |
| 0.558 | 0.117 | ALS2CL       |       |       |          |
| 0.595 | 0.155 | ALAS2        |       |       |          |
| 0.553 | 0.113 | RPS25        |       |       |          |
| 0.545 | 0.105 | KIAA1109     |       |       |          |
| 0.551 | 0.112 | BAMBI        |       |       |          |
| 0.544 | 0.104 | GALNT11      |       |       |          |
| 0.521 | 0.082 | TPI1         |       |       |          |
| 0.586 | 0.148 | PNPLA2       |       |       |          |
| 0.512 | 0.073 | DHX38        |       |       |          |
| 0.603 | 0.165 | NME4         |       |       |          |
| 0.625 | 0.188 | KIAA1024     |       |       |          |
| 0.569 | 0.132 | MCC          |       |       |          |
| 0.590 | 0.153 | SNTA1        |       |       |          |

|       |       |                 |
|-------|-------|-----------------|
| 0.607 | 0.170 | <u>ACSM3</u>    |
| 0.526 | 0.090 | <u>PPFIA1</u>   |
| 0.598 | 0.163 | ZNF253          |
| 0.539 | 0.104 | <u>PARL</u>     |
| 0.539 | 0.105 | <u>GPIBB</u>    |
| 0.556 | 0.122 | <u>A4GALT</u>   |
| 0.579 | 0.146 | <u>CCR10</u>    |
| 0.515 | 0.083 | <u>SNRPD2</u>   |
| 0.588 | 0.156 | C14ORF135       |
| 0.607 | 0.175 | CLSTN2          |
| 0.564 | 0.132 | FCN3            |
| 0.540 | 0.108 | <u>AATF</u>     |
| 0.551 | 0.119 | <u>CFD</u>      |
| 0.548 | 0.116 | <u>CLDN4</u>    |
| 0.571 | 0.139 | <u>ELAVL2</u>   |
| 0.549 | 0.118 | <u>GOLGA3</u>   |
| 0.562 | 0.131 | <u>PIGT</u>     |
| 0.579 | 0.149 | IZUMO4          |
| 0.516 | 0.086 | <u>RFC4</u>     |
| 0.543 | 0.113 | <u>S1PR1</u>    |
| 0.554 | 0.125 | TMEM8A          |
| 0.541 | 0.112 | <u>OSMR</u>     |
| 0.546 | 0.117 | <u>DNM1</u>     |
| 0.514 | 0.086 | <u>FOLR2</u>    |
| 0.537 | 0.109 | <u>GPR88</u>    |
| 0.502 | 0.075 | <u>POLG2</u>    |
| 0.549 | 0.123 | <u>YTHDC1</u>   |
| 0.532 | 0.106 | <u>RPL27</u>    |
| 0.568 | 0.143 | <u>ATAD3A</u>   |
| 0.523 | 0.099 | <u>IER3IP1</u>  |
| 0.557 | 0.134 | <u>USP47</u>    |
| 0.559 | 0.136 | <u>TMEM214</u>  |
| 0.538 | 0.115 | <u>MED23</u>    |
| 0.506 | 0.083 | ZMAT3           |
| 0.600 | 0.177 | <u>CCL21</u>    |
| 0.516 | 0.094 | <u>DNM3</u>     |
| 0.535 | 0.113 | GVINP1          |
| 0.554 | 0.132 | <u>TPBG</u>     |
| 0.546 | 0.124 | <u>HTR3A</u>    |
| 0.502 | 0.080 | <u>DHRS2</u>    |
| 0.548 | 0.128 | <u>ITGA10</u>   |
| 0.515 | 0.095 | <u>TAF4B</u>    |
| 0.546 | 0.126 | <u>TM7SF2</u>   |
| 0.550 | 0.133 | <u>HIST1H4D</u> |
| 0.513 | 0.097 | <u>ONECUT2</u>  |
| 0.519 | 0.103 | <u>NTN3</u>     |
| 0.507 | 0.091 | <u>MAST4</u>    |

|       |       |                  |
|-------|-------|------------------|
| 0.519 | 0.105 | <u>KRT8P12</u>   |
| 0.585 | 0.170 | <u>KIAA0513</u>  |
| 0.548 | 0.134 | <u>EPYC</u>      |
| 0.539 | 0.126 | <u>TFF1</u>      |
| 0.542 | 0.129 | <u>SHOC2</u>     |
| 0.589 | 0.176 | <u>ART3</u>      |
| 0.510 | 0.098 | <u>ARPC1A</u>    |
| 0.530 | 0.119 | ZNF136           |
| 0.536 | 0.125 | <u>OXA1L</u>     |
| 0.558 | 0.147 | <u>NACAP1</u>    |
| 0.563 | 0.152 | <u>TPPP</u>      |
| 0.550 | 0.140 | <u>MYOG</u>      |
| 0.573 | 0.163 | <u>INS</u>       |
| 0.514 | 0.104 | <u>SON</u>       |
| 0.561 | 0.152 | <u>RAB11FIP5</u> |
| 0.502 | 0.093 | <u>ARMC6</u>     |
| 0.511 | 0.102 | <u>PIP</u>       |
| 0.566 | 0.157 | <u>NPTX1</u>     |
| 0.559 | 0.151 | <u>PROX1</u>     |
| 0.519 | 0.111 | <u>ACSL1</u>     |
| 0.522 | 0.114 | <u>STATH</u>     |
| 0.547 | 0.141 | <u>SATB2</u>     |
| 0.534 | 0.129 | <u>ENPP1</u>     |
| 0.514 | 0.109 | <u>HIST1H4B</u>  |
| 0.555 | 0.150 | <u>MYLK3</u>     |
| 0.579 | 0.175 | <u>C2ORF49</u>   |
| 0.521 | 0.118 | <u>AASS</u>      |
| 0.539 | 0.136 | <u>RPL6</u>      |
| 0.554 | 0.150 | <u>F9</u>        |
| 0.546 | 0.144 | SUZ12P           |
| 0.525 | 0.124 | <u>URGCP</u>     |
| 0.581 | 0.180 | <u>SUSD4</u>     |
| 0.536 | 0.136 | <u>SMTN</u>      |
| 0.527 | 0.127 | C7ORF44          |
| 0.559 | 0.160 | <u>MAT1A</u>     |
| 0.547 | 0.148 | <u>LINC00312</u> |
| 0.538 | 0.139 | <u>PPAT</u>      |
| 0.578 | 0.180 | KCTD7            |
| 0.509 | 0.111 | <u>RPL3</u>      |
| 0.571 | 0.173 | <u>GSTCD</u>     |
| 0.534 | 0.136 | <u>NR4A1</u>     |
| 0.574 | 0.177 | <u>STAT5B</u>    |
| 0.565 | 0.169 | <u>HOXB5</u>     |
| 0.545 | 0.148 | <u>RUSC2</u>     |
| 0.503 | 0.107 | <u>ASAP1-IT1</u> |
| 0.522 | 0.126 | <u>STMN1</u>     |
| 0.523 | 0.127 | <u>ACAP2</u>     |

|       |       |                  |
|-------|-------|------------------|
| 0.547 | 0.151 | <u>DDHD2</u>     |
| 0.519 | 0.126 | <u>LSAMP</u>     |
| 0.542 | 0.149 | <u>COL2A1</u>    |
| 0.504 | 0.112 | <u>EMX2</u>      |
| 0.555 | 0.163 | <u>PFKFB4</u>    |
| 0.517 | 0.125 | <u>CEP76</u>     |
| 0.548 | 0.156 | <u>RNF25</u>     |
| 0.506 | 0.115 | <u>GPKOW</u>     |
| 0.510 | 0.119 | <u>LSM3</u>      |
| 0.513 | 0.123 | <u>MAGED1</u>    |
| 0.564 | 0.176 | <u>MST4</u>      |
| 0.543 | 0.155 | <u>HLA-DOB</u>   |
| 0.512 | 0.125 | <u>PCDHA3</u>    |
| 0.539 | 0.151 | <u>EPM2AIP1</u>  |
| 0.505 | 0.117 | <u>SPP1</u>      |
| 0.551 | 0.164 | <u>BBC3</u>      |
| 0.519 | 0.132 | <u>FICD</u>      |
| 0.558 | 0.171 | <u>TRAV8-3</u>   |
| 0.523 | 0.136 | <u>SP140</u>     |
| 0.531 | 0.144 | <u>SSH1</u>      |
| 0.530 | 0.144 | <u>EHD1</u>      |
| 0.531 | 0.145 | <u>TPST1</u>     |
| 0.535 | 0.150 | <u>ITIH2</u>     |
| 0.511 | 0.128 | <u>ITK</u>       |
| 0.522 | 0.139 | <u>GORASP1</u>   |
| 0.528 | 0.146 | <u>ABCA3</u>     |
| 0.513 | 0.131 | <u>TSPYL1</u>    |
| 0.545 | 0.165 | <u>HIST1H2AJ</u> |
| 0.518 | 0.138 | <u>DERL2</u>     |
| 0.501 | 0.121 | <u>RPL34</u>     |
| 0.519 | 0.140 | <u>SNRNP200</u>  |
| 0.561 | 0.183 | <u>SCAF8</u>     |
| 0.527 | 0.149 | <u>SSTR3</u>     |
| 0.543 | 0.165 | <u>TNFRSF13B</u> |
| 0.514 | 0.136 | <u>POLD2</u>     |
| 0.551 | 0.173 | <u>DIO1</u>      |
| 0.524 | 0.148 | <u>CLK2</u>      |
| 0.520 | 0.144 | <u>WRB</u>       |
| 0.563 | 0.187 | <u>AMN</u>       |
| 0.520 | 0.144 | <u>NFYA</u>      |
| 0.511 | 0.136 | <u>SSFA2</u>     |
| 0.537 | 0.164 | <u>PIK3CG</u>    |
| 0.533 | 0.160 | <u>TBKBP1</u>    |
| 0.525 | 0.152 | <u>B4GALNT1</u>  |
| 0.501 | 0.128 | <u>APOBEC3F</u>  |
| 0.508 | 0.136 | <u>NDUFV2</u>    |
| 0.528 | 0.155 | <u>PRTN3</u>     |

|       |       |                 |
|-------|-------|-----------------|
| 0.518 | 0.146 | <u>C7ORF10</u>  |
| 0.523 | 0.151 | <u>RPL17</u>    |
| 0.512 | 0.141 | <u>PPP2R5D</u>  |
| 0.546 | 0.176 | <u>C2CD2</u>    |
| 0.523 | 0.153 | <u>CTSA</u>     |
| 0.517 | 0.148 | <u>ADAMTS5</u>  |
| 0.520 | 0.151 | <u>RPL37</u>    |
| 0.519 | 0.151 | <u>GTF2A1</u>   |
| 0.528 | 0.162 | <u>FAM164A</u>  |
| 0.551 | 0.185 | <u>HLA-DMA</u>  |
| 0.520 | 0.155 | <u>NDP</u>      |
| 0.521 | 0.156 | <u>NIT2</u>     |
| 0.508 | 0.143 | REM1            |
| 0.521 | 0.157 | HAS1            |
| 0.535 | 0.172 | <u>TESK2</u>    |
| 0.516 | 0.152 | <u>RAPGEF2</u>  |
| 0.535 | 0.171 | <u>DDX5</u>     |
| 0.533 | 0.169 | <u>SSBP1</u>    |
| 0.519 | 0.156 | <u>TYRP1</u>    |
| 0.517 | 0.154 | <u>DCUN1D1</u>  |
| 0.507 | 0.144 | <u>HAUS3</u>    |
| 0.504 | 0.142 | <u>FABP5</u>    |
| 0.526 | 0.164 | <u>C8ORF44</u>  |
| 0.532 | 0.169 | <u>STAT2</u>    |
| 0.501 | 0.139 | <u>LPHN3</u>    |
| 0.545 | 0.185 | <u>C4ORF34</u>  |
| 0.540 | 0.180 | <u>PHTF2</u>    |
| 0.529 | 0.169 | <u>DRG1</u>     |
| 0.508 | 0.148 | <u>MAX</u>      |
| 0.514 | 0.155 | <u>MIR22HG</u>  |
| 0.520 | 0.161 | <u>SLC17A1</u>  |
| 0.515 | 0.157 | <u>TBC1D1</u>   |
| 0.524 | 0.166 | <u>BNIP3L</u>   |
| 0.525 | 0.169 | <u>DYNLT1</u>   |
| 0.522 | 0.166 | <u>NEK1</u>     |
| 0.538 | 0.182 | <u>TNFSF9</u>   |
| 0.510 | 0.156 | <u>STARD13</u>  |
| 0.501 | 0.148 | <u>EDNRB</u>    |
| 0.504 | 0.151 | GPR171          |
| 0.531 | 0.178 | <u>FAF2</u>     |
| 0.501 | 0.148 | <u>PINK1</u>    |
| 0.515 | 0.163 | <u>POLM</u>     |
| 0.504 | 0.153 | <u>RUFY2</u>    |
| 0.550 | 0.199 | C14ORF45        |
| 0.535 | 0.185 | <u>ANKZF1</u>   |
| 0.535 | 0.184 | <u>DNASE1L2</u> |
| 0.503 | 0.154 | <u>KRT34</u>    |

|       |       |                  |
|-------|-------|------------------|
| 0.509 | 0.161 | <u>TPP2</u>      |
| 0.507 | 0.161 | <u>PPARG</u>     |
| 0.510 | 0.164 | <u>ZBED5</u>     |
| 0.546 | 0.201 | <u>KCNE4</u>     |
| 0.505 | 0.159 | <u>SETX</u>      |
| 0.519 | 0.174 | <u>PAX6</u>      |
| 0.505 | 0.161 | <u>LGALS9</u>    |
| 0.516 | 0.172 | <u>ATF7IP2</u>   |
| 0.544 | 0.201 | <u>RBFOX1</u>    |
| 0.522 | 0.179 | <u>ZCCHC14</u>   |
| 0.518 | 0.176 | <u>B4GALT2</u>   |
| 0.521 | 0.180 | <u>FKSG49</u>    |
| 0.503 | 0.163 | <u>NUP43</u>     |
| 0.503 | 0.164 | <u>PTPN2</u>     |
| 0.501 | 0.163 | <u>TASP1</u>     |
| 0.501 | 0.163 | <u>C2ORF18</u>   |
| 0.501 | 0.164 | <u>DICER1</u>    |
| 0.523 | 0.187 | <u>SEC22A</u>    |
| 0.504 | 0.167 | <u>NDST3</u>     |
| 0.514 | 0.179 | <u>LRRC20</u>    |
| 0.510 | 0.175 | <u>AKAP12</u>    |
| 0.503 | 0.168 | <u>ZNF528</u>    |
| 0.514 | 0.181 | <u>GFPT2</u>     |
| 0.512 | 0.180 | <u>HECTD3</u>    |
| 0.522 | 0.190 | <u>PSD4</u>      |
| 0.503 | 0.171 | <u>HERC6</u>     |
| 0.503 | 0.172 | <u>ALPL</u>      |
| 0.502 | 0.173 | <u>ATP6V1H</u>   |
| 0.509 | 0.180 | <u>SIPA1</u>     |
| 0.528 | 0.200 | <u>DHRS9</u>     |
| 0.514 | 0.187 | <u>ANXA10</u>    |
| 0.511 | 0.187 | <u>MEIS3P1</u>   |
| 0.513 | 0.189 | <u>MAGEA5</u>    |
| 0.513 | 0.190 | <u>SCAMP1</u>    |
| 0.528 | 0.206 | <u>LMBRD1</u>    |
| 0.505 | 0.184 | <u>TSFM</u>      |
| 0.508 | 0.188 | <u>PRKCH</u>     |
| 0.509 | 0.189 | <u>RPL23AP53</u> |
| 0.504 | 0.184 | <u>TCHH</u>      |
| 0.510 | 0.192 | <u>MICAL2</u>    |
| 0.511 | 0.193 | <u>WIPF1</u>     |
| 0.504 | 0.186 | <u>IL2RG</u>     |
| 0.515 | 0.200 | <u>POR</u>       |
| 0.536 | 0.227 | <u>CCNJ</u>      |
| 0.522 | 0.217 | <u>PHF21A</u>    |
| 0.508 | 0.216 | <u>PDK1</u>      |
| 0.502 | 0.212 | <u>CCL16</u>     |

|       |       |       |  |
|-------|-------|-------|--|
| 0.510 | 0.230 | GNG12 |  |
|-------|-------|-------|--|

### VCAP\_24h based prediction result

| Pa    | Pi    | DownRegulation      | Pa    | Pi    | UpRegulation     |
|-------|-------|---------------------|-------|-------|------------------|
| 0.850 | 0.038 | <u>DLL3</u>         | 0.816 | 0.039 | <u>SF3B5</u>     |
| 0.845 | 0.037 | <u>ELANE</u>        | 0.823 | 0.056 | <u>NDUFAB1</u>   |
| 0.838 | 0.036 | <u>TRAT1</u>        | 0.792 | 0.042 | <u>FAM57A</u>    |
| 0.803 | 0.020 | <u>TSGA10</u>       | 0.776 | 0.051 | <u>SLC50A1</u>   |
| 0.779 | 0.026 | <u>SERHL2</u>       | 0.785 | 0.062 | <u>POP7</u>      |
| 0.776 | 0.028 | <u>DPF1</u>         | 0.759 | 0.048 | <u>MRT04</u>     |
| 0.795 | 0.048 | <u>DNAJC13</u>      | 0.767 | 0.061 | <u>SOAT1</u>     |
| 0.802 | 0.055 | <u>SMR3B</u>        | 0.735 | 0.053 | <u>EXOSC4</u>    |
| 0.796 | 0.051 | <u>DKKL1</u>        | 0.723 | 0.060 | <u>DPAGT1</u>    |
| 0.786 | 0.042 | <u>CLCA4</u>        | 0.727 | 0.066 | <u>SPEF1</u>     |
| 0.838 | 0.098 | <u>DIO1</u>         | 0.726 | 0.066 | <u>TOLLIP</u>    |
| 0.798 | 0.067 | <u>DSG3</u>         | 0.684 | 0.027 | <u>NME1</u>      |
| 0.778 | 0.047 | <u>SH3D21</u>       | 0.695 | 0.042 | <u>TIMM9</u>     |
| 0.770 | 0.040 | <u>GNA14</u>        | 0.701 | 0.052 | <u>GADD45G</u>   |
| 0.770 | 0.041 | <u>AKR1B10</u>      | 0.706 | 0.076 | <u>NDUFV1</u>    |
| 0.752 | 0.027 | <u>ARL14</u>        | 0.712 | 0.083 | <u>POLR3K</u>    |
| 0.767 | 0.045 | <u>TBKBP1</u>       | 0.694 | 0.066 | <u>GOLPH3</u>    |
| 0.748 | 0.028 | <u>NRN1</u>         | 0.691 | 0.064 | <u>PLA2G4A</u>   |
| 0.772 | 0.055 | <u>CALML4</u>       | 0.679 | 0.057 | <u>DBI</u>       |
| 0.760 | 0.047 | <u>ELF3</u>         | 0.680 | 0.058 | <u>OSBPL9</u>    |
| 0.791 | 0.082 | <u>CCK</u>          | 0.689 | 0.068 | <u>SPHK1</u>     |
| 0.776 | 0.066 | <u>ERAP2</u>        | 0.674 | 0.057 | <u>CYB561D2</u>  |
| 0.739 | 0.048 | <u>TMEM100</u>      | 0.670 | 0.056 | <u>F5</u>        |
| 0.726 | 0.038 | <u>CRADD</u>        | 0.664 | 0.054 | <u>LRRC6</u>     |
| 0.731 | 0.043 | <u>C1ORF61</u>      | 0.699 | 0.090 | <u>MCMBP</u>     |
| 0.750 | 0.067 | <u>FAM5C</u>        | 0.680 | 0.071 | <u>TRAF2</u>     |
| 0.716 | 0.036 | <u>LARS</u>         | 0.662 | 0.055 | <u>C14ORF135</u> |
| 0.730 | 0.051 | <u>EHHADH</u>       | 0.671 | 0.064 | <u>CDC6</u>      |
| 0.725 | 0.046 | <u>LOC220594</u>    | 0.696 | 0.090 | <u>ATP5G3</u>    |
| 0.714 | 0.043 | <u>EFNA3</u>        | 0.665 | 0.062 | <u>GOLPH3L</u>   |
| 0.730 | 0.062 | <u>FGF13</u>        | 0.654 | 0.052 | <u>USP47</u>     |
| 0.742 | 0.080 | <u>APH1B</u>        | 0.649 | 0.048 | <u>NCAPG</u>     |
| 0.704 | 0.042 | <u>REG3A</u>        | 0.668 | 0.067 | <u>FADD</u>      |
| 0.745 | 0.083 | <u>AKTIP</u>        | 0.665 | 0.064 | <u>MLPH</u>      |
| 0.723 | 0.063 | <u>EPHX3</u>        | 0.676 | 0.080 | <u>NCOA3</u>     |
| 0.711 | 0.064 | <u>DPEP1</u>        | 0.666 | 0.071 | <u>CGA</u>       |
| 0.686 | 0.039 | <u>CHKB</u>         | 0.643 | 0.048 | <u>CDR2L</u>     |
| 0.697 | 0.052 | <u>LOC100507009</u> | 0.716 | 0.122 | <u>ASS1</u>      |
| 0.719 | 0.076 | <u>ADIPOR1</u>      | 0.627 | 0.033 | <u>RPIA</u>      |
| 0.718 | 0.077 | <u>DCUN1D2</u>      | 0.688 | 0.094 | <u>TRMT12</u>    |
| 0.683 | 0.046 | <u>SLC35A5</u>      | 0.688 | 0.095 | <u>THOP1</u>     |

|       |       |                  |       |       |                 |
|-------|-------|------------------|-------|-------|-----------------|
| 0.699 | 0.063 | <u>ENPP2</u>     | 0.668 | 0.075 | <u>GPATCH1</u>  |
| 0.701 | 0.066 | <u>PANX1</u>     | 0.682 | 0.091 | <u>ZMPSTE24</u> |
| 0.713 | 0.079 | <u>PAMR1</u>     | 0.645 | 0.058 | <u>VEGFC</u>    |
| 0.682 | 0.049 | <u>LRRC8D</u>    | 0.649 | 0.062 | <u>CCDC19</u>   |
| 0.694 | 0.064 | <u>FOXG1</u>     | 0.668 | 0.083 | <u>UBE2D3</u>   |
| 0.690 | 0.063 | <u>TPK1</u>      | 0.684 | 0.099 | <u>CRISPLD2</u> |
| 0.730 | 0.103 | <u>PIEZO2</u>    | 0.654 | 0.071 | <u>RPS8</u>     |
| 0.690 | 0.063 | <u>LACTB2</u>    | 0.691 | 0.108 | <u>NDUFB2</u>   |
| 0.687 | 0.061 | <u>ISL1</u>      | 0.650 | 0.069 | <u>C17ORF85</u> |
| 0.671 | 0.052 | <u>PDGFD</u>     | 0.649 | 0.069 | <u>HSD17B1</u>  |
| 0.698 | 0.083 | <u>GABARAPL1</u> | 0.669 | 0.089 | <u>RFPL2</u>    |
| 0.684 | 0.070 | <u>AHNAK</u>     | 0.659 | 0.080 | <u>SEPHS2</u>   |
| 0.683 | 0.071 | <u>C16ORF88</u>  | 0.637 | 0.065 | <u>EIF3L</u>    |
| 0.690 | 0.078 | <u>RSBN1</u>     | 0.657 | 0.087 | <u>BOLA1</u>    |
| 0.675 | 0.063 | <u>LINC00341</u> | 0.660 | 0.091 | <u>PTCD3</u>    |
| 0.675 | 0.064 | <u>NUDT2</u>     | 0.618 | 0.049 | <u>NXT1</u>     |
| 0.697 | 0.087 | <u>SLC26A4</u>   | 0.635 | 0.067 | <u>FAM69A</u>   |
| 0.670 | 0.060 | <u>SATB1</u>     | 0.662 | 0.095 | <u>OAS1</u>     |
| 0.669 | 0.060 | <u>AKR1C3</u>    | 0.649 | 0.084 | <u>S100BPB</u>  |
| 0.669 | 0.064 | <u>AQR</u>       | 0.654 | 0.091 | <u>TMEM184B</u> |
| 0.704 | 0.098 | <u>CAPN3</u>     | 0.629 | 0.066 | <u>NAT10</u>    |
| 0.686 | 0.081 | <u>TMED7</u>     | 0.648 | 0.086 | <u>TNFSF4</u>   |
| 0.691 | 0.086 | <u>C12ORF48</u>  | 0.667 | 0.106 | <u>ACAD8</u>    |
| 0.695 | 0.090 | <u>DYNC1H1</u>   | 0.657 | 0.096 | <u>SOX12</u>    |
| 0.672 | 0.069 | <u>ECH1</u>      | 0.629 | 0.068 | <u>RANBP6</u>   |
| 0.671 | 0.068 | <u>C15ORF44</u>  | 0.627 | 0.067 | <u>CXCL13</u>   |
| 0.668 | 0.065 | <u>WFS1</u>      | 0.634 | 0.074 | <u>ACTR3</u>    |
| 0.655 | 0.053 | <u>MORC3</u>     | 0.668 | 0.108 | <u>TMEM231</u>  |
| 0.655 | 0.055 | <u>IER3IP1</u>   | 0.618 | 0.058 | <u>C8ORF55</u>  |
| 0.655 | 0.056 | <u>INS</u>       | 0.638 | 0.079 | <u>EIF2C3</u>   |
| 0.670 | 0.071 | <u>CTRB2</u>     | 0.667 | 0.108 | <u>TUBA1B</u>   |
| 0.658 | 0.060 | <u>TGIF1</u>     | 0.649 | 0.090 | <u>C5ORF22</u>  |
| 0.716 | 0.121 | <u>ALAS2</u>     | 0.662 | 0.103 | <u>SRSF4</u>    |
| 0.670 | 0.075 | <u>KCNG1</u>     | 0.641 | 0.083 | <u>TARP</u>     |
| 0.682 | 0.088 | <u>CCHCR1</u>    | 0.639 | 0.082 | <u>GABPA</u>    |
| 0.641 | 0.047 | <u>ARID5B</u>    | 0.625 | 0.068 | <u>FRAT2</u>    |
| 0.679 | 0.085 | <u>SLC4A1AP</u>  | 0.648 | 0.091 | <u>ADRA2A</u>   |
| 0.648 | 0.057 | <u>TCEA2</u>     | 0.640 | 0.083 | <u>NUCB2</u>    |
| 0.692 | 0.107 | <u>EVPL</u>      | 0.628 | 0.072 | <u>PC</u>       |
| 0.624 | 0.038 | <u>AZI1</u>      | 0.661 | 0.105 | <u>SFT2D2</u>   |
| 0.697 | 0.113 | <u>MYLK3</u>     | 0.662 | 0.107 | <u>MAP4K2</u>   |
| 0.652 | 0.071 | <u>PMP22</u>     | 0.613 | 0.058 | <u>GSTO1</u>    |
| 0.650 | 0.070 | <u>C6ORF145</u>  | 0.648 | 0.094 | <u>CNIH4</u>    |
| 0.666 | 0.086 | <u>UBAP2</u>     | 0.617 | 0.063 | <u>CD2AP</u>    |
| 0.648 | 0.068 | <u>ARHGAP4</u>   | 0.644 | 0.090 | <u>HBXIP</u>    |
| 0.659 | 0.079 | <u>AIFM1</u>     | 0.651 | 0.098 | <u>ISL1</u>     |
| 0.653 | 0.074 | <u>MLH1</u>      | 0.637 | 0.085 | <u>GPAA1</u>    |

|       |       |                 |       |       |                     |
|-------|-------|-----------------|-------|-------|---------------------|
| 0.635 | 0.057 | <u>METTL22</u>  | 0.635 | 0.084 | <u>XBP1</u>         |
| 0.669 | 0.092 | <u>ADCY7</u>    | 0.632 | 0.081 | <u>TIPARP</u>       |
| 0.659 | 0.083 | <u>RABEP2</u>   | 0.625 | 0.075 | <u>CTSC</u>         |
| 0.638 | 0.063 | <u>UQCC</u>     | 0.622 | 0.072 | <u>SEPT8</u>        |
| 0.654 | 0.078 | <u>PVRL2</u>    | 0.626 | 0.077 | <u>NIT2</u>         |
| 0.633 | 0.059 | <u>SLC35A1</u>  | 0.654 | 0.106 | <u>TMEM14B</u>      |
| 0.646 | 0.071 | <u>ABCD4</u>    | 0.637 | 0.090 | <u>CTR9</u>         |
| 0.629 | 0.056 | <u>ZNF710</u>   | 0.619 | 0.073 | <u>GALE</u>         |
| 0.670 | 0.097 | <u>SMA4</u>     | 0.625 | 0.082 | <u>C14ORF133</u>    |
| 0.654 | 0.082 | <u>YEATS4</u>   | 0.596 | 0.053 | <u>RPP25</u>        |
| 0.682 | 0.110 | <u>ACADS</u>    | 0.641 | 0.098 | <u>AP3S1</u>        |
| 0.667 | 0.096 | <u>FTO</u>      | 0.643 | 0.102 | <u>MAD2L1</u>       |
| 0.684 | 0.114 | <u>KIAA1024</u> | 0.633 | 0.092 | <u>PDE9A</u>        |
| 0.646 | 0.077 | <u>PDS5A</u>    | 0.613 | 0.072 | <u>PIP</u>          |
| 0.652 | 0.084 | <u>SCFD1</u>    | 0.626 | 0.086 | <u>NHP2</u>         |
| 0.660 | 0.094 | <u>KRT3</u>     | 0.627 | 0.087 | <u>ZNF629</u>       |
| 0.624 | 0.057 | <u>NHEJ1</u>    | 0.640 | 0.101 | <u>CDT1</u>         |
| 0.654 | 0.088 | <u>MAP6D1</u>   | 0.641 | 0.102 | <u>TBCB</u>         |
| 0.640 | 0.074 | <u>OXA1L</u>    | 0.619 | 0.081 | <u>FAM106A</u>      |
| 0.615 | 0.050 | <u>FAM110B</u>  | 0.623 | 0.085 | <u>MT1P2</u>        |
| 0.692 | 0.127 | <u>UGT8</u>     | 0.620 | 0.082 | <u>FBL</u>          |
| 0.640 | 0.074 | <u>DYNC1LI1</u> | 0.628 | 0.092 | <u>DKFZP547G183</u> |
| 0.666 | 0.101 | <u>PLA2G15</u>  | 0.606 | 0.070 | <u>CCND2</u>        |
| 0.626 | 0.062 | <u>POT1</u>     | 0.590 | 0.056 | <u>HOMER2</u>       |
| 0.676 | 0.112 | <u>HTN1</u>     | 0.631 | 0.097 | <u>HPCAL1</u>       |
| 0.625 | 0.062 | <u>KCNIP1</u>   | 0.623 | 0.090 | <u>MALT1</u>        |
| 0.658 | 0.095 | <u>PIGL</u>     | 0.640 | 0.108 | <u>KIF18A</u>       |
| 0.638 | 0.075 | <u>RSL24D1</u>  | 0.615 | 0.084 | <u>ZRSR2</u>        |
| 0.636 | 0.074 | <u>COL17A1</u>  | 0.612 | 0.081 | <u>FAM179B</u>      |
| 0.615 | 0.053 | <u>MEP1A</u>    | 0.643 | 0.112 | <u>U2AF1</u>        |
| 0.631 | 0.070 | <u>PNKP</u>     | 0.631 | 0.100 | <u>TNFRSF13B</u>    |
| 0.646 | 0.085 | <u>COL9A3</u>   | 0.581 | 0.053 | <u>PLK1</u>         |
| 0.648 | 0.087 | <u>ACTR10</u>   | 0.621 | 0.094 | <u>FLJ13197</u>     |
| 0.668 | 0.107 | <u>MAP1B</u>    | 0.595 | 0.068 | <u>PABPC1</u>       |
| 0.654 | 0.094 | <u>CLDN18</u>   | 0.637 | 0.110 | <u>PES1</u>         |
| 0.642 | 0.082 | <u>SERPINE2</u> | 0.593 | 0.067 | <u>C21ORF91</u>     |
| 0.663 | 0.104 | <u>TNFRSF1B</u> | 0.571 | 0.045 | <u>TCFL5</u>        |
| 0.643 | 0.084 | <u>TMEM161A</u> | 0.593 | 0.068 | <u>CHIC2</u>        |
| 0.644 | 0.085 | <u>FAM171A1</u> | 0.590 | 0.066 | <u>FAM168B</u>      |
| 0.613 | 0.055 | <u>AARS</u>     | 0.620 | 0.096 | <u>CSNK1G3</u>      |
| 0.638 | 0.081 | <u>OPA1</u>     | 0.605 | 0.083 | <u>ICAM2</u>        |
| 0.607 | 0.050 | <u>APOBEC1</u>  | 0.587 | 0.066 | <u>ATG2B</u>        |
| 0.652 | 0.095 | <u>MAGEB2</u>   | 0.616 | 0.095 | <u>FZD5</u>         |
| 0.641 | 0.086 | <u>ASPM</u>     | 0.627 | 0.106 | <u>DDA1</u>         |
| 0.641 | 0.086 | <u>SDAD1</u>    | 0.605 | 0.084 | <u>SLC13A2</u>      |
| 0.655 | 0.101 | <u>HDHD1</u>    | 0.612 | 0.091 | <u>EIF2C2</u>       |
| 0.636 | 0.083 | <u>TBCCD1</u>   | 0.603 | 0.083 | <u>NME7</u>         |

|       |       |                     |       |       |                 |
|-------|-------|---------------------|-------|-------|-----------------|
| 0.632 | 0.080 | <u>UBE2S</u>        | 0.599 | 0.079 | <u>PRMT1</u>    |
| 0.641 | 0.089 | <u>MEIS1</u>        | 0.612 | 0.092 | <u>EFHC1</u>    |
| 0.627 | 0.076 | <u>DCAF6</u>        | 0.607 | 0.088 | <u>FAM171A1</u> |
| 0.608 | 0.058 | <u>PFKM</u>         | 0.603 | 0.086 | <u>RBM23</u>    |
| 0.653 | 0.104 | <u>SLC35C2</u>      | 0.594 | 0.078 | <u>KCTD3</u>    |
| 0.721 | 0.172 | <u>GATA4</u>        | 0.597 | 0.082 | <u>MRPL17</u>   |
| 0.628 | 0.080 | <u>TMBIM4</u>       | 0.597 | 0.082 | <u>ITGAV</u>    |
| 0.619 | 0.072 | <u>ETHE1</u>        | 0.633 | 0.119 | <u>THYN1</u>    |
| 0.640 | 0.093 | <u>PTCRA</u>        | 0.626 | 0.114 | <u>FSTL3</u>    |
| 0.677 | 0.130 | <u>S100A3</u>       | 0.605 | 0.093 | <u>SH3GL1</u>   |
| 0.599 | 0.055 | <u>LMO7</u>         | 0.595 | 0.083 | <u>VAPB</u>     |
| 0.635 | 0.092 | <u>PTCD3</u>        | 0.618 | 0.108 | <u>DCTPP1</u>   |
| 0.624 | 0.080 | <u>PIPOX</u>        | 0.621 | 0.111 | <u>LRRK1</u>    |
| 0.625 | 0.082 | <u>PGRMC2</u>       | 0.568 | 0.058 | <u>VPS26A</u>   |
| 0.632 | 0.090 | <u>VSNL1</u>        | 0.591 | 0.082 | <u>FAM178A</u>  |
| 0.614 | 0.071 | <u>MTMR11</u>       | 0.623 | 0.115 | <u>MYH10</u>    |
| 0.622 | 0.080 | <u>USP3</u>         | 0.620 | 0.113 | <u>LRRC17</u>   |
| 0.652 | 0.112 | <u>ANO3</u>         | 0.608 | 0.101 | <u>CRNKL1</u>   |
| 0.659 | 0.119 | <u>RWDD3</u>        | 0.599 | 0.093 | <u>PLA1A</u>    |
| 0.608 | 0.070 | <u>NT5DC2</u>       | 0.639 | 0.133 | <u>ATP5O</u>    |
| 0.674 | 0.136 | <u>AQP6</u>         | 0.592 | 0.087 | <u>MRPL12</u>   |
| 0.682 | 0.145 | <u>C2ORF44</u>      | 0.632 | 0.129 | <u>OBFC2B</u>   |
| 0.606 | 0.069 | <u>EXOSC5</u>       | 0.596 | 0.093 | <u>FAM118A</u>  |
| 0.610 | 0.075 | <u>TUFT1</u>        | 0.601 | 0.098 | <u>CCNO</u>     |
| 0.608 | 0.074 | <u>CRIP1</u>        | 0.631 | 0.129 | <u>ANXA3</u>    |
| 0.648 | 0.114 | <u>ATAD2B</u>       | 0.619 | 0.119 | <u>PAX6</u>     |
| 0.628 | 0.095 | <u>ABTB2</u>        | 0.604 | 0.105 | <u>MAN1C1</u>   |
| 0.610 | 0.079 | <u>CD96</u>         | 0.627 | 0.129 | <u>RABGGTA</u>  |
| 0.649 | 0.119 | <u>MX2</u>          | 0.574 | 0.076 | <u>CCT6A</u>    |
| 0.618 | 0.088 | <u>SGTA</u>         | 0.554 | 0.057 | <u>RSRC1</u>    |
| 0.620 | 0.091 | <u>CDC14B</u>       | 0.586 | 0.090 | <u>SETMAR</u>   |
| 0.593 | 0.065 | <u>PRG4</u>         | 0.592 | 0.095 | <u>PROC</u>     |
| 0.614 | 0.086 | <u>LOC100506469</u> | 0.594 | 0.098 | <u>GBP1</u>     |
| 0.646 | 0.119 | <u>SLC43A3</u>      | 0.593 | 0.097 | <u>CCL21</u>    |
| 0.610 | 0.083 | <u>GAP43</u>        | 0.596 | 0.100 | <u>FAM50B</u>   |
| 0.588 | 0.062 | <u>HDAC5</u>        | 0.564 | 0.068 | <u>NOLC1</u>    |
| 0.648 | 0.122 | <u>CCDC41</u>       | 0.580 | 0.084 | <u>PDE1A</u>    |
| 0.588 | 0.065 | <u>ERN2</u>         | 0.571 | 0.075 | <u>CAD</u>      |
| 0.603 | 0.080 | <u>HDAC7</u>        | 0.586 | 0.090 | <u>FKBP10</u>   |
| 0.613 | 0.091 | <u>TSPAN1</u>       | 0.582 | 0.087 | <u>TKT</u>      |
| 0.621 | 0.099 | <u>FLRT3</u>        | 0.562 | 0.067 | <u>LCN2</u>     |
| 0.648 | 0.128 | <u>MED13L</u>       | 0.596 | 0.101 | <u>HEXB</u>     |
| 0.617 | 0.098 | <u>TNS3</u>         | 0.601 | 0.108 | <u>CARHSP1</u>  |
| 0.622 | 0.105 | <u>CCNG2</u>        | 0.606 | 0.113 | <u>NR2C2</u>    |
| 0.612 | 0.096 | <u>IARS</u>         | 0.606 | 0.114 | <u>PPA1</u>     |
| 0.628 | 0.113 | <u>ZNF22</u>        | 0.564 | 0.072 | <u>KLHL9</u>    |
| 0.615 | 0.100 | <u>ETFDH</u>        | 0.566 | 0.074 | <u>ATAD3A</u>   |

|       |       |                 |       |       |                 |
|-------|-------|-----------------|-------|-------|-----------------|
| 0.569 | 0.054 | <u>PPCDC</u>    | 0.580 | 0.089 | <u>FZD10</u>    |
| 0.602 | 0.087 | <u>ABCA3</u>    | 0.573 | 0.082 | <u>CHL1</u>     |
| 0.581 | 0.067 | <u>NOL6</u>     | 0.639 | 0.148 | <u>TPST2</u>    |
| 0.591 | 0.077 | LOC100286895    | 0.603 | 0.113 | C2ORF28         |
| 0.613 | 0.099 | <u>FEM1B</u>    | 0.580 | 0.091 | <u>SIDT1</u>    |
| 0.613 | 0.100 | <u>PARP4</u>    | 0.609 | 0.120 | <u>MRPL4</u>    |
| 0.613 | 0.100 | <u>FZD7</u>     | 0.595 | 0.106 | <u>QSER1</u>    |
| 0.632 | 0.119 | <u>OPA3</u>     | 0.607 | 0.118 | <u>IL21R</u>    |
| 0.585 | 0.073 | GPA33           | 0.572 | 0.085 | <u>METTL18</u>  |
| 0.602 | 0.090 | <u>ADAM10</u>   | 0.577 | 0.091 | <u>EPM2AIP1</u> |
| 0.610 | 0.099 | <u>EPRS</u>     | 0.593 | 0.107 | <u>NFE2L1</u>   |
| 0.606 | 0.096 | ZNF12           | 0.606 | 0.120 | <u>MAK</u>      |
| 0.627 | 0.117 | <u>RAB28</u>    | 0.612 | 0.127 | <u>IQGAP2</u>   |
| 0.600 | 0.091 | <u>PHGDH</u>    | 0.599 | 0.114 | <u>PPP4R2</u>   |
| 0.575 | 0.067 | <u>PLCD1</u>    | 0.569 | 0.084 | <u>MFAP1</u>    |
| 0.598 | 0.090 | <u>FAIM2</u>    | 0.598 | 0.113 | IGKV3-20        |
| 0.591 | 0.084 | <u>IFNGR1</u>   | 0.583 | 0.098 | <u>UBE2A</u>    |
| 0.595 | 0.088 | ZG16            | 0.558 | 0.073 | <u>DERL2</u>    |
| 0.590 | 0.083 | <u>RNF41</u>    | 0.610 | 0.127 | <u>UBN1</u>     |
| 0.597 | 0.090 | <u>GTPBP3</u>   | 0.571 | 0.088 | <u>LHX1</u>     |
| 0.612 | 0.105 | <u>IL17RB</u>   | 0.554 | 0.072 | <u>ORMDL2</u>   |
| 0.611 | 0.105 | <u>DERL1</u>    | 0.571 | 0.089 | <u>KEAP1</u>    |
| 0.611 | 0.106 | <u>CD3EAP</u>   | 0.594 | 0.113 | <u>FBXL8</u>    |
| 0.612 | 0.106 | <u>RMND1</u>    | 0.626 | 0.147 | <u>CSTF3</u>    |
| 0.594 | 0.089 | <u>TOM1L1</u>   | 0.600 | 0.121 | <u>AKR1A1</u>   |
| 0.587 | 0.082 | <u>PYROXD1</u>  | 0.578 | 0.098 | <u>PILRB</u>    |
| 0.651 | 0.147 | <u>EDEM1</u>    | 0.567 | 0.088 | <u>BRMS1</u>    |
| 0.636 | 0.132 | <u>BEX1</u>     | 0.566 | 0.087 | <u>SPAG1</u>    |
| 0.640 | 0.137 | <u>PNRC1</u>    | 0.591 | 0.113 | <u>INSM1</u>    |
| 0.626 | 0.123 | <u>SLC48A1</u>  | 0.619 | 0.142 | <u>DEXI</u>     |
| 0.627 | 0.124 | <u>FAM55C</u>   | 0.590 | 0.113 | <u>SFXN3</u>    |
| 0.577 | 0.074 | <u>IREB2</u>    | 0.615 | 0.139 | <u>SLCO4A1</u>  |
| 0.597 | 0.094 | <u>UNC5B</u>    | 0.585 | 0.109 | <u>PRRX1</u>    |
| 0.642 | 0.139 | <u>HBD</u>      | 0.576 | 0.101 | <u>DAD1</u>     |
| 0.581 | 0.079 | <u>ITGA6</u>    | 0.605 | 0.130 | <u>ACAP1</u>    |
| 0.596 | 0.094 | <u>DAK</u>      | 0.601 | 0.127 | <u>RETN</u>     |
| 0.595 | 0.094 | <u>RPS9</u>     | 0.578 | 0.104 | LINC00342       |
| 0.596 | 0.096 | <u>PIAS1</u>    | 0.546 | 0.072 | <u>CTDSP1</u>   |
| 0.577 | 0.077 | <u>F8</u>       | 0.564 | 0.091 | <u>ICAM3</u>    |
| 0.537 | 0.037 | <u>TRIM17</u>   | 0.564 | 0.091 | <u>COPS6</u>    |
| 0.616 | 0.116 | <u>GNAL</u>     | 0.577 | 0.105 | <u>TM9SF3</u>   |
| 0.605 | 0.105 | <u>LTK</u>      | 0.596 | 0.124 | <u>DYNLT1</u>   |
| 0.581 | 0.083 | <u>C10ORF88</u> | 0.570 | 0.098 | <u>SCGB1D2</u>  |
| 0.589 | 0.092 | <u>RGS2</u>     | 0.580 | 0.108 | C7ORF28B        |
| 0.610 | 0.113 | <u>PLEKHA1</u>  | 0.606 | 0.134 | <u>PSMC1</u>    |
| 0.593 | 0.096 | <u>NCKAP1</u>   | 0.573 | 0.102 | <u>CSTF1</u>    |
| 0.567 | 0.070 | C9ORF82         | 0.602 | 0.131 | <u>C1ORF106</u> |

|       |       |                 |       |       |                 |
|-------|-------|-----------------|-------|-------|-----------------|
| 0.606 | 0.110 | <u>CKAP5</u>    | 0.575 | 0.105 | <u>BRE</u>      |
| 0.587 | 0.091 | <u>SNX15</u>    | 0.604 | 0.133 | <u>CYP27B1</u>  |
| 0.617 | 0.121 | <u>SMARCC2</u>  | 0.541 | 0.071 | <u>RDH14</u>    |
| 0.602 | 0.106 | LOC283683       | 0.556 | 0.086 | <u>RRAGA</u>    |
| 0.582 | 0.087 | <u>FADD</u>     | 0.587 | 0.117 | <u>ZBBX</u>     |
| 0.619 | 0.124 | <u>PFDN5</u>    | 0.567 | 0.098 | <u>CCDC15</u>   |
| 0.590 | 0.095 | <u>KIAA0922</u> | 0.596 | 0.127 | <u>CD38</u>     |
| 0.594 | 0.100 | <u>IFITM3</u>   | 0.535 | 0.067 | <u>RPL34</u>    |
| 0.603 | 0.110 | <u>LHPP</u>     | 0.564 | 0.096 | <u>CRNN</u>     |
| 0.588 | 0.095 | <u>MARK4</u>    | 0.565 | 0.097 | <u>MMADHC</u>   |
| 0.628 | 0.135 | <u>CDKN2AIP</u> | 0.589 | 0.121 | C6ORF120        |
| 0.584 | 0.092 | LOC100129361    | 0.588 | 0.121 | <u>TSSC1</u>    |
| 0.603 | 0.111 | <u>C5AR1</u>    | 0.569 | 0.103 | <u>KIFC1</u>    |
| 0.605 | 0.113 | <u>PLS3</u>     | 0.586 | 0.120 | <u>CCNB1</u>    |
| 0.596 | 0.104 | <u>VAT1</u>     | 0.553 | 0.087 | <u>INPP1</u>    |
| 0.548 | 0.057 | <u>CERS4</u>    | 0.566 | 0.102 | GRRP1           |
| 0.555 | 0.064 | <u>DNMT1</u>    | 0.576 | 0.113 | <u>XAB2</u>     |
| 0.601 | 0.110 | <u>SLC18A2</u>  | 0.572 | 0.108 | <u>ACOT8</u>    |
| 0.565 | 0.075 | <u>DNAJA4</u>   | 0.565 | 0.102 | <u>PTRH2</u>    |
| 0.582 | 0.092 | <u>FADS3</u>    | 0.582 | 0.119 | <u>TTC30A</u>   |
| 0.565 | 0.076 | <u>LRRC59</u>   | 0.574 | 0.112 | <u>KIF3B</u>    |
| 0.613 | 0.124 | <u>PTGIR</u>    | 0.565 | 0.103 | <u>TUBBP5</u>   |
| 0.609 | 0.120 | <u>SLC7A10</u>  | 0.586 | 0.124 | <u>C3</u>       |
| 0.584 | 0.097 | <u>RPL28</u>    | 0.583 | 0.121 | <u>HIST1H4B</u> |
| 0.629 | 0.143 | <u>CEPT1</u>    | 0.573 | 0.112 | <u>PFKP</u>     |
| 0.585 | 0.099 | <u>NECAP2</u>   | 0.584 | 0.123 | <u>LARS2</u>    |
| 0.577 | 0.091 | <u>RHOT1</u>    | 0.569 | 0.108 | <u>MLXIPL</u>   |
| 0.578 | 0.092 | <u>MAST2</u>    | 0.598 | 0.137 | <u>TRIM9</u>    |
| 0.591 | 0.105 | <u>FLNA</u>     | 0.562 | 0.102 | <u>MYBL2</u>    |
| 0.578 | 0.093 | <u>CEACAM6</u>  | 0.586 | 0.126 | <u>PDE5A</u>    |
| 0.547 | 0.063 | <u>TINF2</u>    | 0.589 | 0.129 | <u>TMSB10</u>   |
| 0.577 | 0.093 | <u>GNB2L1</u>   | 0.574 | 0.115 | <u>CORO2A</u>   |
| 0.588 | 0.104 | <u>STMN1</u>    | 0.583 | 0.125 | ZSCAN16         |
| 0.575 | 0.091 | <u>NIF3L1</u>   | 0.547 | 0.090 | <u>NID2</u>     |
| 0.584 | 0.101 | <u>KRT5</u>     | 0.570 | 0.113 | <u>SLMO2</u>    |
| 0.582 | 0.099 | <u>C4ORF27</u>  | 0.513 | 0.056 | <u>CDC20</u>    |
| 0.556 | 0.074 | <u>DRAM1</u>    | 0.561 | 0.105 | ZNF10           |
| 0.599 | 0.117 | <u>HMGCS2</u>   | 0.562 | 0.105 | <u>ERG</u>      |
| 0.583 | 0.103 | <u>CITED2</u>   | 0.562 | 0.106 | <u>EMID1</u>    |
| 0.572 | 0.092 | <u>BCORL1</u>   | 0.572 | 0.116 | <u>HELLS</u>    |
| 0.607 | 0.127 | <u>PINK1</u>    | 0.542 | 0.086 | <u>CLEC11A</u>  |
| 0.589 | 0.110 | C13ORF27        | 0.586 | 0.130 | <u>ZBED1</u>    |
| 0.606 | 0.127 | <u>TFF2</u>     | 0.589 | 0.133 | FOXH1           |
| 0.572 | 0.093 | <u>RPH3AL</u>   | 0.565 | 0.110 | <u>PPP6R3</u>   |
| 0.560 | 0.081 | <u>TPMT</u>     | 0.572 | 0.117 | <u>PROS1</u>    |
| 0.577 | 0.098 | <u>AASS</u>     | 0.565 | 0.110 | <u>PRRC2B</u>   |
| 0.583 | 0.105 | <u>KIAA0355</u> | 0.623 | 0.169 | <u>IMPDH2</u>   |

|       |       |                  |       |       |                 |
|-------|-------|------------------|-------|-------|-----------------|
| 0.549 | 0.071 | <u>NSMAF</u>     | 0.549 | 0.094 | <u>BTBD3</u>    |
| 0.600 | 0.122 | <u>SNX24</u>     | 0.550 | 0.096 | <u>PSMA6</u>    |
| 0.592 | 0.114 | <u>SMARCD1</u>   | 0.571 | 0.117 | <u>PTX3</u>     |
| 0.601 | 0.124 | <u>FAF2</u>      | 0.563 | 0.109 | <u>GOLGA4</u>   |
| 0.600 | 0.123 | <u>IRS2</u>      | 0.575 | 0.122 | <u>ID1</u>      |
| 0.562 | 0.084 | <u>GTF2E2</u>    | 0.569 | 0.117 | <u>UBB</u>      |
| 0.581 | 0.104 | <u>COPB2</u>     | 0.565 | 0.113 | <u>LIMS3</u>    |
| 0.588 | 0.111 | <u>LYN</u>       | 0.550 | 0.098 | <u>MOGS</u>     |
| 0.565 | 0.089 | <u>AGXT2L1</u>   | 0.582 | 0.131 | <u>ATP5L</u>    |
| 0.588 | 0.113 | <u>CST3</u>      | 0.593 | 0.143 | <u>OFD1</u>     |
| 0.546 | 0.071 | <u>SMYD5</u>     | 0.586 | 0.136 | <u>CHMP4A</u>   |
| 0.564 | 0.089 | <u>ATP11A</u>    | 0.574 | 0.123 | <u>AKR1D1</u>   |
| 0.556 | 0.081 | <u>IER3</u>      | 0.565 | 0.115 | <u>EIF3M</u>    |
| 0.576 | 0.102 | <u>TMEM41B</u>   | 0.532 | 0.083 | <u>PELO</u>     |
| 0.581 | 0.107 | <u>PCTP</u>      | 0.570 | 0.121 | <u>CHAC1</u>    |
| 0.602 | 0.128 | <u>SALL1</u>     | 0.576 | 0.128 | <u>TULP1</u>    |
| 0.587 | 0.113 | <u>TNRC6B</u>    | 0.561 | 0.113 | <u>ZNF124</u>   |
| 0.586 | 0.112 | <u>CLSTN1</u>    | 0.569 | 0.121 | <u>PIAS3</u>    |
| 0.589 | 0.115 | <u>PDE8B</u>     | 0.580 | 0.133 | <u>GOLGA8A</u>  |
| 0.553 | 0.080 | <u>SLC41A3</u>   | 0.567 | 0.121 | <u>ZMIZ1</u>    |
| 0.614 | 0.141 | <u>BDNF</u>      | 0.576 | 0.130 | <u>IVNS1ABP</u> |
| 0.553 | 0.081 | <u>PPIE</u>      | 0.577 | 0.132 | <u>FJX1</u>     |
| 0.556 | 0.086 | <u>EMP1</u>      | 0.554 | 0.109 | <u>RRP8</u>     |
| 0.566 | 0.095 | <u>SGPP1</u>     | 0.541 | 0.096 | <u>TDO2</u>     |
| 0.571 | 0.101 | <u>FJX1</u>      | 0.540 | 0.094 | <u>ORC1</u>     |
| 0.617 | 0.146 | <u>YPEL5</u>     | 0.552 | 0.107 | <u>BASP1</u>    |
| 0.559 | 0.089 | <u>MAP1S</u>     | 0.562 | 0.118 | <u>COQ4</u>     |
| 0.539 | 0.069 | <u>FOXF2</u>     | 0.556 | 0.111 | <u>PUS7</u>     |
| 0.558 | 0.089 | <u>SPEG</u>      | 0.559 | 0.115 | <u>DGKZ</u>     |
| 0.579 | 0.109 | <u>PSPH</u>      | 0.566 | 0.122 | <u>ZNF337</u>   |
| 0.590 | 0.121 | <u>PDK4</u>      | 0.555 | 0.112 | <u>TPR</u>      |
| 0.567 | 0.098 | <u>EEF1B2</u>    | 0.576 | 0.133 | <u>FGF17</u>    |
| 0.595 | 0.126 | <u>SLTM</u>      | 0.605 | 0.162 | <u>SNRPE</u>    |
| 0.537 | 0.069 | <u>LPPR3</u>     | 0.554 | 0.112 | <u>PRSS8</u>    |
| 0.571 | 0.103 | <u>BAG4</u>      | 0.564 | 0.122 | <u>C15ORF5</u>  |
| 0.534 | 0.067 | <u>RHOA</u>      | 0.559 | 0.118 | <u>TSPAN13</u>  |
| 0.552 | 0.085 | <u>TLR2</u>      | 0.570 | 0.129 | <u>SLC9A3R2</u> |
| 0.562 | 0.096 | <u>USP11</u>     | 0.556 | 0.116 | <u>CPEB3</u>    |
| 0.560 | 0.093 | <u>IMPACT</u>    | 0.550 | 0.109 | <u>CCL5</u>     |
| 0.567 | 0.101 | <u>NENF</u>      | 0.538 | 0.099 | <u>MORF4L2</u>  |
| 0.590 | 0.124 | <u>SMARCE1</u>   | 0.546 | 0.107 | <u>BATF3</u>    |
| 0.553 | 0.087 | <u>TCTN2</u>     | 0.550 | 0.111 | <u>PPP2R3C</u>  |
| 0.584 | 0.119 | <u>PGRMC1</u>    | 0.557 | 0.119 | <u>MAP3K11</u>  |
| 0.592 | 0.127 | <u>LGR4</u>      | 0.545 | 0.108 | <u>RAI14</u>    |
| 0.568 | 0.103 | <u>LIN7A</u>     | 0.545 | 0.108 | <u>CENPF</u>    |
| 0.571 | 0.106 | <u>TUSC3</u>     | 0.548 | 0.111 | <u>SLC26A6</u>  |
| 0.559 | 0.094 | <u>TNFRSF12A</u> | 0.526 | 0.091 | <u>PLP2</u>     |

|       |       |                 |       |       |                   |
|-------|-------|-----------------|-------|-------|-------------------|
| 0.562 | 0.098 | <u>RPS6KA3</u>  | 0.565 | 0.130 | <u>DNAL4</u>      |
| 0.551 | 0.088 | <u>UGT2A3</u>   | 0.556 | 0.121 | <u>MT1H</u>       |
| 0.564 | 0.101 | <u>C9ORF40</u>  | 0.545 | 0.111 | <u>GIMAP6</u>     |
| 0.581 | 0.118 | <u>OAZ2</u>     | 0.543 | 0.109 | <u>NIP7</u>       |
| 0.580 | 0.117 | <u>CDK5RAP2</u> | 0.556 | 0.123 | <u>G3BP2</u>      |
| 0.579 | 0.117 | <u>RALBP1</u>   | 0.562 | 0.130 | <u>UBXN1</u>      |
| 0.529 | 0.067 | <u>LYZ</u>      | 0.558 | 0.127 | <u>DLGAP5</u>     |
| 0.589 | 0.128 | <u>SPRR1A</u>   | 0.539 | 0.107 | <u>ANKRD36</u>    |
| 0.606 | 0.145 | <u>TUBGCP4</u>  | 0.547 | 0.116 | <u>TMPRSS2</u>    |
| 0.536 | 0.075 | <u>DHRS3</u>    | 0.550 | 0.120 | <u>FANCI</u>      |
| 0.560 | 0.100 | <u>CAD</u>      | 0.552 | 0.122 | <u>NUMA1</u>      |
| 0.566 | 0.105 | <u>UIMC1</u>    | 0.526 | 0.096 | <u>CADPS2</u>     |
| 0.601 | 0.141 | <u>HR</u>       | 0.563 | 0.134 | <u>SEMG1</u>      |
| 0.570 | 0.110 | <u>SLC29A3</u>  | 0.555 | 0.126 | <u>PNMA1</u>      |
| 0.575 | 0.116 | <u>ITGAX</u>    | 0.558 | 0.130 | <u>SLC22A18AS</u> |
| 0.565 | 0.106 | <u>GRB10</u>    | 0.552 | 0.124 | <u>SORL1</u>      |
| 0.552 | 0.093 | <u>CTCF</u>     | 0.543 | 0.115 | <u>ASL</u>        |
| 0.565 | 0.107 | <u>TERF2IP</u>  | 0.520 | 0.092 | <u>IFI44</u>      |
| 0.607 | 0.149 | <u>AHCTF1</u>   | 0.570 | 0.142 | <u>ZFAND1</u>     |
| 0.575 | 0.118 | <u>YLPM1</u>    | 0.551 | 0.124 | <u>DDI2</u>       |
| 0.545 | 0.088 | <u>PCMTD2</u>   | 0.535 | 0.109 | <u>IGFBP4</u>     |
| 0.608 | 0.152 | <u>GLCE</u>     | 0.529 | 0.104 | <u>KDELC1</u>     |
| 0.620 | 0.164 | <u>IGKV4-1</u>  | 0.547 | 0.123 | <u>GTF2A2</u>     |
| 0.580 | 0.124 | <u>DENND4B</u>  | 0.528 | 0.105 | <u>DZANK1</u>     |
| 0.600 | 0.144 | <u>CD1A</u>     | 0.572 | 0.148 | <u>TPX2</u>       |
| 0.584 | 0.130 | <u>CHMP1A</u>   | 0.562 | 0.138 | <u>TLL3</u>       |
| 0.556 | 0.101 | <u>B3GNT1</u>   | 0.542 | 0.119 | <u>LTA4H</u>      |
| 0.567 | 0.113 | <u>STRN3</u>    | 0.544 | 0.121 | <u>FMO1</u>       |
| 0.546 | 0.091 | <u>ARHGAP15</u> | 0.548 | 0.125 | <u>KRT8P12</u>    |
| 0.581 | 0.128 | <u>FAM114A1</u> | 0.533 | 0.110 | <u>SAT1</u>       |
| 0.570 | 0.117 | <u>RUVBL1</u>   | 0.527 | 0.105 | <u>PISD</u>       |
| 0.575 | 0.122 | <u>ATP5B</u>    | 0.551 | 0.129 | <u>CLK2</u>       |
| 0.565 | 0.113 | <u>SCMH1</u>    | 0.548 | 0.127 | <u>IRF1</u>       |
| 0.557 | 0.105 | <u>WRN</u>      | 0.555 | 0.135 | <u>AURKA</u>      |
| 0.522 | 0.070 | <u>ODAM</u>     | 0.519 | 0.099 | <u>PLOD2</u>      |
| 0.588 | 0.137 | <u>RRAS2</u>    | 0.539 | 0.119 | <u>CNDP2</u>      |
| 0.561 | 0.109 | <u>LTBR</u>     | 0.557 | 0.138 | <u>ITB</u>        |
| 0.562 | 0.110 | <u>ASAP1</u>    | 0.538 | 0.119 | <u>TNNC1</u>      |
| 0.553 | 0.101 | <u>ATP6V0A1</u> | 0.541 | 0.122 | <u>DUSP13</u>     |
| 0.570 | 0.118 | <u>TMEM97</u>   | 0.565 | 0.147 | <u>PRR7</u>       |
| 0.544 | 0.093 | <u>MECR</u>     | 0.517 | 0.100 | <u>TMEM185B</u>   |
| 0.564 | 0.114 | <u>U2AF1</u>    | 0.535 | 0.118 | <u>ELAVL3</u>     |
| 0.586 | 0.136 | <u>GSTM4</u>    | 0.547 | 0.132 | <u>HDGF</u>       |
| 0.560 | 0.110 | <u>CHERP</u>    | 0.538 | 0.123 | <u>RRP7A</u>      |
| 0.551 | 0.101 | <u>CIDEB</u>    | 0.536 | 0.121 | <u>MXD1</u>       |
| 0.551 | 0.102 | <u>OSGEP</u>    | 0.544 | 0.129 | <u>C11ORF58</u>   |
| 0.565 | 0.116 | <u>ACTA1</u>    | 0.540 | 0.126 | <u>UAP1L1</u>     |

|       |       |                     |       |       |                  |
|-------|-------|---------------------|-------|-------|------------------|
| 0.557 | 0.109 | <u>DPYSL2</u>       | 0.524 | 0.109 | <u>ESF1</u>      |
| 0.530 | 0.083 | <u>FOXO3</u>        | 0.533 | 0.118 | <u>KIAA0355</u>  |
| 0.549 | 0.102 | <u>NAT2</u>         | 0.553 | 0.138 | <u>FOXC2</u>     |
| 0.594 | 0.147 | <u>L1TD1</u>        | 0.533 | 0.118 | <u>ZNF165</u>    |
| 0.554 | 0.108 | <u>RPL23</u>        | 0.518 | 0.103 | <u>ASPM</u>      |
| 0.546 | 0.100 | <u>ABCA8</u>        | 0.559 | 0.146 | <u>IST1</u>      |
| 0.548 | 0.102 | <u>APPL1</u>        | 0.522 | 0.110 | <u>SLC12A1</u>   |
| 0.562 | 0.117 | <u>UBE2D2</u>       | 0.535 | 0.123 | <u>PALMD</u>     |
| 0.574 | 0.129 | <u>RB1CC1</u>       | 0.573 | 0.161 | <u>GPX1</u>      |
| 0.564 | 0.119 | <u>UBAP1</u>        | 0.524 | 0.113 | <u>MRPS31</u>    |
| 0.547 | 0.102 | <u>MTCP1NB</u>      | 0.548 | 0.137 | <u>WDR59</u>     |
| 0.542 | 0.097 | <u>DOCK4</u>        | 0.540 | 0.129 | <u>PSD3</u>      |
| 0.577 | 0.133 | <u>HOXD11</u>       | 0.518 | 0.107 | <u>HYMAI</u>     |
| 0.548 | 0.104 | <u>CYP3A5</u>       | 0.515 | 0.104 | <u>SCAMP3</u>    |
| 0.565 | 0.121 | <u>RCE1</u>         | 0.549 | 0.139 | <u>ABHD10</u>    |
| 0.558 | 0.115 | <u>DUSP8</u>        | 0.525 | 0.115 | <u>CIB1</u>      |
| 0.546 | 0.102 | <u>MORF4L2</u>      | 0.541 | 0.131 | <u>DFNA5</u>     |
| 0.571 | 0.127 | <u>MTUS1</u>        | 0.526 | 0.117 | <u>VAX2</u>      |
| 0.562 | 0.120 | <u>FAM82A2</u>      | 0.542 | 0.133 | <u>MYC</u>       |
| 0.574 | 0.132 | <u>TAF1C</u>        | 0.518 | 0.110 | <u>ZNF185</u>    |
| 0.601 | 0.159 | <u>YIPF5</u>        | 0.532 | 0.124 | <u>LIMK2</u>     |
| 0.608 | 0.166 | <u>LOC100127972</u> | 0.559 | 0.151 | <u>HIST1H2BM</u> |
| 0.556 | 0.114 | <u>C6ORF108</u>     | 0.542 | 0.134 | <u>ARFIP1</u>    |
| 0.544 | 0.102 | <u>ZNF219</u>       | 0.531 | 0.124 | <u>BTN3A3</u>    |
| 0.576 | 0.135 | <u>AP3M2</u>        | 0.515 | 0.109 | <u>NDUFB11</u>   |
| 0.587 | 0.146 | <u>TEX261</u>       | 0.560 | 0.155 | <u>MARCH5</u>    |
| 0.548 | 0.108 | <u>SERPINI1</u>     | 0.550 | 0.145 | <u>MEIS2</u>     |
| 0.549 | 0.109 | <u>HAUS6</u>        | 0.539 | 0.134 | <u>LEFTY2</u>    |
| 0.555 | 0.116 | <u>CNOT6</u>        | 0.529 | 0.123 | <u>POLI</u>      |
| 0.573 | 0.134 | <u>SEC61G</u>       | 0.544 | 0.140 | <u>C22ORF29</u>  |
| 0.518 | 0.079 | <u>ALPK3</u>        | 0.532 | 0.129 | <u>LOC644450</u> |
| 0.602 | 0.165 | <u>AQP9</u>         | 0.547 | 0.144 | <u>RPP14</u>     |
| 0.550 | 0.114 | <u>LAD1</u>         | 0.533 | 0.130 | <u>NFS1</u>      |
| 0.530 | 0.094 | <u>POF1B</u>        | 0.530 | 0.127 | <u>ARNT2</u>     |
| 0.552 | 0.116 | <u>ADIPOR2</u>      | 0.528 | 0.125 | <u>IFITM3</u>    |
| 0.568 | 0.133 | <u>KARS</u>         | 0.528 | 0.126 | <u>IFIT1</u>     |
| 0.556 | 0.121 | <u>HHIPL2</u>       | 0.529 | 0.128 | <u>POGK</u>      |
| 0.528 | 0.093 | <u>SLC6A4</u>       | 0.535 | 0.134 | <u>ZNF573</u>    |
| 0.550 | 0.115 | <u>ZNF358</u>       | 0.551 | 0.150 | <u>ZBTB48</u>    |
| 0.555 | 0.121 | <u>ATXN2</u>        | 0.507 | 0.107 | <u>ZNF268</u>    |
| 0.556 | 0.121 | <u>MYO1C</u>        | 0.518 | 0.119 | <u>FOXM1</u>     |
| 0.558 | 0.124 | <u>APBA2</u>        | 0.542 | 0.144 | <u>PODXL2</u>    |
| 0.536 | 0.103 | <u>RNF44</u>        | 0.539 | 0.141 | <u>PTPRK</u>     |
| 0.556 | 0.123 | <u>MAK16</u>        | 0.541 | 0.143 | <u>TENC1</u>     |
| 0.558 | 0.125 | <u>COL11A1</u>      | 0.573 | 0.175 | <u>CCR9</u>      |
| 0.558 | 0.126 | <u>ADAM17</u>       | 0.533 | 0.136 | <u>MALL</u>      |
| 0.526 | 0.094 | <u>ELOVL2</u>       | 0.514 | 0.118 | <u>ASCC1</u>     |

|       |       |                   |       |       |                  |
|-------|-------|-------------------|-------|-------|------------------|
| 0.552 | 0.120 | <u>MOB3B</u>      | 0.527 | 0.130 | <u>IDH3B</u>     |
| 0.549 | 0.118 | <u>MAPT</u>       | 0.524 | 0.128 | <u>PAF1</u>      |
| 0.522 | 0.091 | <u>JAK1</u>       | 0.536 | 0.140 | <u>HSPA8</u>     |
| 0.565 | 0.134 | <u>KCTD5</u>      | 0.542 | 0.147 | <u>ARPC5</u>     |
| 0.572 | 0.142 | <u>CUL4A</u>      | 0.512 | 0.117 | <u>PHF10</u>     |
| 0.531 | 0.101 | <u>UBE2K</u>      | 0.521 | 0.125 | <u>CFB</u>       |
| 0.574 | 0.144 | <u>CRYL1</u>      | 0.515 | 0.121 | <u>SLC25A37</u>  |
| 0.572 | 0.142 | <u>C16ORF7</u>    | 0.513 | 0.119 | <u>TBP</u>       |
| 0.537 | 0.107 | <u>C20ORF4</u>    | 0.502 | 0.108 | <u>TXNL1</u>     |
| 0.546 | 0.115 | <u>PSMG2</u>      | 0.528 | 0.134 | <u>UCP2</u>      |
| 0.590 | 0.161 | <u>ABR</u>        | 0.508 | 0.115 | <u>CASP3</u>     |
| 0.533 | 0.104 | <u>PPL</u>        | 0.528 | 0.135 | <u>CSN1S1</u>    |
| 0.538 | 0.109 | <u>SEC24B</u>     | 0.509 | 0.116 | <u>SSB</u>       |
| 0.562 | 0.133 | <u>TTC33</u>      | 0.544 | 0.154 | <u>TRMT1</u>     |
| 0.551 | 0.123 | <u>RALGPS1</u>    | 0.510 | 0.120 | <u>DYM</u>       |
| 0.524 | 0.095 | <u>GATAD1</u>     | 0.564 | 0.174 | <u>SNRPB2</u>    |
| 0.565 | 0.138 | <u>MTMR4</u>      | 0.533 | 0.144 | <u>SMTN</u>      |
| 0.541 | 0.114 | <u>MYL12A</u>     | 0.507 | 0.117 | <u>CENPM</u>     |
| 0.544 | 0.117 | <u>RCBTB1</u>     | 0.538 | 0.149 | <u>CENPB</u>     |
| 0.536 | 0.110 | <u>ABCB4</u>      | 0.516 | 0.127 | <u>PFDN2</u>     |
| 0.542 | 0.116 | <u>NDUFAF4</u>    | 0.513 | 0.125 | <u>SIX1</u>      |
| 0.569 | 0.143 | <u>CSDE1</u>      | 0.533 | 0.144 | <u>CDK18</u>     |
| 0.515 | 0.088 | <u>PPP2R5A</u>    | 0.554 | 0.166 | <u>ITM2B</u>     |
| 0.520 | 0.094 | <u>DCAF17</u>     | 0.525 | 0.137 | <u>NUP43</u>     |
| 0.543 | 0.118 | <u>PLP1</u>       | 0.539 | 0.151 | <u>PCDHA10</u>   |
| 0.553 | 0.127 | <u>GPRC5A</u>     | 0.517 | 0.130 | <u>FRAT1</u>     |
| 0.518 | 0.093 | <u>ALAS1</u>      | 0.533 | 0.146 | <u>PCDHGA9</u>   |
| 0.550 | 0.124 | <u>CREBL2</u>     | 0.519 | 0.132 | <u>COL6A3</u>    |
| 0.540 | 0.115 | <u>MFF</u>        | 0.504 | 0.117 | <u>ITFG1</u>     |
| 0.528 | 0.104 | <u>RPL29</u>      | 0.515 | 0.129 | <u>GNA12</u>     |
| 0.528 | 0.103 | <u>SPINK4</u>     | 0.528 | 0.143 | <u>DYSF</u>      |
| 0.548 | 0.124 | <u>UGGT2</u>      | 0.511 | 0.126 | <u>TRIM36</u>    |
| 0.571 | 0.147 | <u>LINC00472</u>  | 0.520 | 0.135 | <u>CCNE2</u>     |
| 0.530 | 0.106 | <u>CDO1</u>       | 0.546 | 0.162 | <u>IL36A</u>     |
| 0.528 | 0.105 | <u>RPS8</u>       | 0.529 | 0.145 | <u>DAAM1</u>     |
| 0.566 | 0.143 | <u>PLEKHB1</u>    | 0.530 | 0.146 | <u>TPRKB</u>     |
| 0.523 | 0.099 | <u>RTN4</u>       | 0.527 | 0.143 | <u>GPR20</u>     |
| 0.544 | 0.121 | <u>COL6A2</u>     | 0.504 | 0.120 | <u>TFAP2A</u>    |
| 0.529 | 0.107 | <u>SREK1IP1</u>   | 0.515 | 0.132 | <u>C14ORF109</u> |
| 0.544 | 0.123 | <u>ODF2</u>       | 0.531 | 0.147 | <u>GIMAP4</u>    |
| 0.571 | 0.150 | <u>CACNB3</u>     | 0.534 | 0.151 | <u>EPHB1</u>     |
| 0.522 | 0.101 | <u>CSGALNACT2</u> | 0.530 | 0.148 | <u>ZNF204P</u>   |
| 0.535 | 0.114 | <u>HSPA13</u>     | 0.501 | 0.120 | <u>SEPX1</u>     |
| 0.541 | 0.121 | <u>PIM1</u>       | 0.534 | 0.153 | <u>PLK4</u>      |
| 0.521 | 0.101 | <u>BRIX1</u>      | 0.515 | 0.135 | <u>ARL8B</u>     |
| 0.564 | 0.144 | <u>TPM2</u>       | 0.542 | 0.162 | <u>HAPLN1</u>    |
| 0.549 | 0.129 | <u>PRPH</u>       | 0.516 | 0.136 | <u>FAM46C</u>    |

|       |       |                 |       |       |                  |
|-------|-------|-----------------|-------|-------|------------------|
| 0.540 | 0.121 | <u>RPS29</u>    | 0.535 | 0.157 | <u>SLC9A2</u>    |
| 0.523 | 0.103 | <u>HMGCR</u>    | 0.529 | 0.152 | <u>TNN</u>       |
| 0.560 | 0.141 | <u>IRF5</u>     | 0.519 | 0.142 | <u>CLN6</u>      |
| 0.505 | 0.086 | <u>RRP1B</u>    | 0.512 | 0.135 | <u>FER</u>       |
| 0.515 | 0.096 | <u>CETP</u>     | 0.523 | 0.146 | <u>COLQ</u>      |
| 0.540 | 0.121 | <u>C12ORF10</u> | 0.517 | 0.140 | <u>TMEM156</u>   |
| 0.542 | 0.124 | <u>GSN</u>      | 0.543 | 0.167 | <u>SF3A2</u>     |
| 0.526 | 0.108 | <u>APTX</u>     | 0.515 | 0.139 | <u>TGFBRAP1</u>  |
| 0.571 | 0.153 | <u>ODF1</u>     | 0.534 | 0.159 | <u>ATP6V0E2</u>  |
| 0.539 | 0.122 | <u>NFKBIA</u>   | 0.509 | 0.134 | <u>P2RY10</u>    |
| 0.596 | 0.179 | <u>ZNF124</u>   | 0.528 | 0.154 | <u>GCM1</u>      |
| 0.555 | 0.139 | <u>SLC9A5</u>   | 0.524 | 0.150 | <u>SLC37A1</u>   |
| 0.557 | 0.140 | <u>CCNJ</u>     | 0.510 | 0.137 | <u>BCLAF1</u>    |
| 0.559 | 0.143 | <u>RIPK4</u>    | 0.507 | 0.134 | <u>KIF3A</u>     |
| 0.520 | 0.103 | <u>PRRG1</u>    | 0.529 | 0.156 | <u>COL5A1</u>    |
| 0.549 | 0.133 | <u>HERC2</u>    | 0.520 | 0.148 | <u>GYPE</u>      |
| 0.542 | 0.126 | <u>PCP4</u>     | 0.540 | 0.169 | <u>TNMD</u>      |
| 0.559 | 0.144 | <u>TBL1XR1</u>  | 0.511 | 0.140 | <u>KIAA1661</u>  |
| 0.599 | 0.184 | <u>PHLDA3</u>   | 0.526 | 0.155 | <u>HIST1H1B</u>  |
| 0.538 | 0.123 | <u>RPL9</u>     | 0.523 | 0.152 | <u>FGF3</u>      |
| 0.526 | 0.111 | <u>TRAP1</u>    | 0.521 | 0.150 | <u>PER3</u>      |
| 0.552 | 0.137 | <u>NEFM</u>     | 0.506 | 0.135 | <u>NADSYN1</u>   |
| 0.505 | 0.091 | <u>ABHD3</u>    | 0.514 | 0.144 | <u>MTIF2</u>     |
| 0.528 | 0.114 | <u>RPS7</u>     | 0.522 | 0.152 | <u>CLDN8</u>     |
| 0.587 | 0.173 | <u>CRY2</u>     | 0.524 | 0.154 | <u>ZNF783</u>    |
| 0.514 | 0.100 | <u>RPS3</u>     | 0.522 | 0.153 | <u>ETV1</u>      |
| 0.566 | 0.152 | <u>EPB49</u>    | 0.525 | 0.157 | <u>PAX1</u>      |
| 0.557 | 0.145 | <u>ROD1</u>     | 0.521 | 0.153 | <u>EFCAB1</u>    |
| 0.551 | 0.138 | <u>PLXNA1</u>   | 0.511 | 0.143 | <u>C20ORF46</u>  |
| 0.593 | 0.181 | <u>RHBG</u>     | 0.509 | 0.141 | <u>RIPK4</u>     |
| 0.553 | 0.143 | <u>VCAN</u>     | 0.529 | 0.161 | <u>NEUROG3</u>   |
| 0.524 | 0.114 | <u>TFCP2</u>    | 0.506 | 0.139 | <u>REC8</u>      |
| 0.594 | 0.184 | <u>CBY1</u>     | 0.510 | 0.142 | <u>PLAGL1</u>    |
| 0.549 | 0.140 | <u>RPS6</u>     | 0.503 | 0.135 | <u>PORCN</u>     |
| 0.503 | 0.095 | <u>CEP192</u>   | 0.515 | 0.148 | <u>WDR52</u>     |
| 0.535 | 0.126 | <u>GDAP1L1</u>  | 0.508 | 0.141 | <u>LOC390940</u> |
| 0.540 | 0.131 | <u>MAN2B2</u>   | 0.502 | 0.135 | <u>SH3D21</u>    |
| 0.535 | 0.127 | <u>C9ORF46</u>  | 0.521 | 0.155 | <u>CYP39A1</u>   |
| 0.527 | 0.119 | <u>H2BFS</u>    | 0.506 | 0.141 | <u>C1ORF54</u>   |
| 0.522 | 0.115 | <u>MYLK</u>     | 0.517 | 0.152 | <u>HSPA4</u>     |
| 0.512 | 0.105 | <u>WSCD1</u>    | 0.520 | 0.156 | <u>FABP5</u>     |
| 0.556 | 0.149 | <u>PHF16</u>    | 0.527 | 0.162 | <u>CNPPD1</u>    |
| 0.515 | 0.109 | <u>TCEA1</u>    | 0.517 | 0.152 | <u>IDO1</u>      |
| 0.527 | 0.122 | <u>PDIA4</u>    | 0.529 | 0.165 | <u>REPIN1</u>    |
| 0.570 | 0.165 | <u>SOSTDC1</u>  | 0.504 | 0.141 | <u>CPNE7</u>     |
| 0.559 | 0.154 | <u>ENOX2</u>    | 0.512 | 0.149 | <u>PKN2</u>      |
| 0.547 | 0.142 | <u>BCL7A</u>    | 0.531 | 0.168 | <u>IL24</u>      |

|       |       |                 |       |       |                  |
|-------|-------|-----------------|-------|-------|------------------|
| 0.522 | 0.118 | <u>RPL13</u>    | 0.520 | 0.157 | <u>ESRP2</u>     |
| 0.556 | 0.152 | <u>RASSF4</u>   | 0.528 | 0.165 | <u>PDE4B</u>     |
| 0.525 | 0.121 | <u>ZFAND5</u>   | 0.511 | 0.150 | <u>SATB2</u>     |
| 0.510 | 0.107 | <u>BRF2</u>     | 0.503 | 0.142 | <u>OTUD4</u>     |
| 0.610 | 0.207 | <u>SH3BP1</u>   | 0.503 | 0.142 | <u>MKKS</u>      |
| 0.514 | 0.111 | <u>RPL36A</u>   | 0.518 | 0.158 | <u>CKB</u>       |
| 0.520 | 0.118 | <u>DNAJB9</u>   | 0.520 | 0.160 | <u>NAT6</u>      |
| 0.537 | 0.135 | <u>CHST2</u>    | 0.520 | 0.160 | <u>SCGB2A1</u>   |
| 0.508 | 0.106 | <u>SNX6</u>     | 0.512 | 0.153 | <u>ICA1</u>      |
| 0.517 | 0.116 | <u>ARFIP2</u>   | 0.519 | 0.160 | <u>SLC13A4</u>   |
| 0.572 | 0.171 | <u>MARCH8</u>   | 0.532 | 0.173 | <u>FBN1</u>      |
| 0.549 | 0.149 | <u>ATP6V0D1</u> | 0.511 | 0.152 | <u>RPS14P3</u>   |
| 0.536 | 0.137 | <u>NFKBIL1</u>  | 0.514 | 0.155 | <u>HOXB1</u>     |
| 0.525 | 0.125 | <u>ANXA7</u>    | 0.522 | 0.163 | <u>ARHGEF7</u>   |
| 0.531 | 0.132 | <u>DTWD1</u>    | 0.505 | 0.148 | <u>ANKRD12</u>   |
| 0.524 | 0.125 | <u>OSBPL1A</u>  | 0.507 | 0.149 | <u>DDIT4</u>     |
| 0.564 | 0.166 | <u>MAP1LC3C</u> | 0.510 | 0.153 | <u>FBXW4P1</u>   |
| 0.539 | 0.141 | <u>BBC3</u>     | 0.511 | 0.153 | <u>TMEM30B</u>   |
| 0.581 | 0.183 | <u>SMCHD1</u>   | 0.507 | 0.150 | <u>SRPX</u>      |
| 0.524 | 0.127 | <u>CYR61</u>    | 0.501 | 0.145 | <u>RPS2P45</u>   |
| 0.538 | 0.141 | <u>CHMP3</u>    | 0.535 | 0.179 | <u>SCARF1</u>    |
| 0.564 | 0.167 | <u>HNRNPH2</u>  | 0.514 | 0.159 | <u>HDAC6</u>     |
| 0.574 | 0.178 | <u>DNMBP</u>    | 0.501 | 0.146 | <u>EYA4</u>      |
| 0.533 | 0.136 | <u>WDR3</u>     | 0.506 | 0.151 | <u>HIST1H2BC</u> |
| 0.555 | 0.159 | <u>MUC5AC</u>   | 0.502 | 0.148 | <u>C19ORF2</u>   |
| 0.567 | 0.172 | <u>PCYOX1L</u>  | 0.505 | 0.151 | <u>TRIM33</u>    |
| 0.533 | 0.138 | <u>IDH3G</u>    | 0.508 | 0.155 | <u>XK</u>        |
| 0.512 | 0.117 | <u>HOXC10</u>   | 0.503 | 0.150 | <u>GPR97</u>     |
| 0.518 | 0.123 | <u>USP14</u>    | 0.522 | 0.170 | <u>FFAR3</u>     |
| 0.551 | 0.156 | <u>HIF1AN</u>   | 0.524 | 0.173 | <u>HIST1H1D</u>  |
| 0.538 | 0.143 | <u>ARHGEF2</u>  | 0.516 | 0.164 | <u>LAMTOR2</u>   |
| 0.508 | 0.114 | <u>TRAPPC6A</u> | 0.514 | 0.162 | <u>KCNC3</u>     |
| 0.519 | 0.125 | <u>SERPINA4</u> | 0.517 | 0.166 | <u>SIX5</u>      |
| 0.518 | 0.124 | <u>NFYB</u>     | 0.507 | 0.155 | <u>ZNF280D</u>   |
| 0.506 | 0.112 | <u>RPL6</u>     | 0.514 | 0.163 | <u>ITPR1</u>     |
| 0.570 | 0.176 | <u>AOAH</u>     | 0.513 | 0.162 | <u>SUV39H2</u>   |
| 0.544 | 0.150 | <u>MEIS3P1</u>  | 0.520 | 0.169 | <u>MCM5</u>      |
| 0.539 | 0.145 | <u>SEMA6A</u>   | 0.509 | 0.158 | <u>PRKACG</u>    |
| 0.536 | 0.143 | <u>METTL2B</u>  | 0.515 | 0.165 | <u>SH3BGRL3</u>  |
| 0.520 | 0.127 | <u>SH3BGRL3</u> | 0.510 | 0.161 | <u>FGF23</u>     |
| 0.535 | 0.142 | <u>DCTN4</u>    | 0.501 | 0.153 | <u>RRAD</u>      |
| 0.541 | 0.149 | <u>ACSBG1</u>   | 0.513 | 0.165 | <u>EPHB4</u>     |
| 0.540 | 0.148 | <u>STXBP2</u>   | 0.502 | 0.155 | <u>UCP1</u>      |
| 0.541 | 0.149 | <u>FXYD3</u>    | 0.506 | 0.158 | <u>MGC12488</u>  |
| 0.536 | 0.144 | <u>CLIC3</u>    | 0.515 | 0.168 | <u>PTBP2</u>     |
| 0.506 | 0.114 | <u>CLEC11A</u>  | 0.501 | 0.154 | <u>UBA7</u>      |
| 0.509 | 0.117 | <u>DMBT1</u>    | 0.510 | 0.163 | <u>MPV17</u>     |

|       |       |                 |       |       |                 |
|-------|-------|-----------------|-------|-------|-----------------|
| 0.521 | 0.130 | <u>CCNC</u>     | 0.518 | 0.172 | <u>CYP11B2</u>  |
| 0.524 | 0.132 | <u>ZC3H14</u>   | 0.509 | 0.163 | <u>ARAP1</u>    |
| 0.551 | 0.160 | <u>CD80</u>     | 0.505 | 0.159 | <u>USP32</u>    |
| 0.535 | 0.144 | <u>TMSB10</u>   | 0.520 | 0.174 | <u>C1ORF38</u>  |
| 0.504 | 0.114 | <u>PRPF8</u>    | 0.521 | 0.176 | <u>TCN2</u>     |
| 0.517 | 0.127 | <u>CAMTA1</u>   | 0.509 | 0.164 | <u>DCN</u>      |
| 0.544 | 0.154 | <u>CIC</u>      | 0.502 | 0.158 | <u>WNT7A</u>    |
| 0.515 | 0.126 | <u>WDR74</u>    | 0.501 | 0.157 | <u>IMMT</u>     |
| 0.522 | 0.133 | <u>LIAS</u>     | 0.518 | 0.176 | <u>PAGE4</u>    |
| 0.542 | 0.154 | <u>BTBD1</u>    | 0.506 | 0.164 | <u>RAPGEF3</u>  |
| 0.519 | 0.132 | <u>BBS7</u>     | 0.503 | 0.161 | <u>CEP170</u>   |
| 0.541 | 0.154 | <u>FERMT1</u>   | 0.503 | 0.162 | <u>FAM164C</u>  |
| 0.523 | 0.137 | <u>SLC22A18</u> | 0.501 | 0.160 | <u>TWSG1</u>    |
| 0.509 | 0.124 | <u>GIMAP5</u>   | 0.526 | 0.185 | <u>MTCH2</u>    |
| 0.514 | 0.129 | <u>F9</u>       | 0.521 | 0.181 | <u>DACH1</u>    |
| 0.528 | 0.142 | <u>ST8SIA5</u>  | 0.506 | 0.166 | <u>TYMS</u>     |
| 0.545 | 0.160 | <u>MAGEA12</u>  | 0.506 | 0.167 | <u>MAPRE3</u>   |
| 0.535 | 0.150 | <u>PPM1A</u>    | 0.506 | 0.168 | <u>PDSS2</u>    |
| 0.529 | 0.143 | <u>VCAM1</u>    | 0.504 | 0.166 | <u>C10ORF92</u> |
| 0.552 | 0.168 | <u>ARFGAP3</u>  | 0.503 | 0.165 | <u>TTC38</u>    |
| 0.512 | 0.127 | <u>KLHDC2</u>   | 0.508 | 0.171 | <u>KIF24</u>    |
| 0.530 | 0.145 | <u>APOL1</u>    | 0.518 | 0.184 | <u>HMGN3</u>    |
| 0.508 | 0.124 | <u>EIF2B3</u>   | 0.519 | 0.185 | <u>ACTA1</u>    |
| 0.543 | 0.159 | <u>CASP2</u>    | 0.530 | 0.197 | <u>TRIM5</u>    |
| 0.512 | 0.129 | <u>NSUN5P2</u>  | 0.507 | 0.175 | <u>ALPP</u>     |
| 0.527 | 0.144 | <u>DLG1</u>     | 0.502 | 0.173 | <u>ASTE1</u>    |
| 0.522 | 0.138 | <u>STX10</u>    | 0.511 | 0.184 | <u>IGLL3P</u>   |
| 0.557 | 0.175 | <u>EPB41L2</u>  | 0.505 | 0.178 | <u>PRR16</u>    |
| 0.528 | 0.145 | <u>NANOG</u>    | 0.501 | 0.175 | <u>CDH11</u>    |
| 0.543 | 0.161 | <u>TAC3</u>     | 0.501 | 0.176 | <u>RASIP1</u>   |
| 0.508 | 0.126 | <u>HPRT1</u>    | 0.506 | 0.184 | <u>SMPD3</u>    |
| 0.539 | 0.157 | <u>STC1</u>     | 0.502 | 0.183 | <u>ACTL7A</u>   |
| 0.510 | 0.128 | <u>DMRT1</u>    | 0.511 | 0.193 | <u>DCPS</u>     |
| 0.530 | 0.148 | <u>PAK2</u>     | 0.505 | 0.189 | <u>H2AFZ</u>    |
| 0.529 | 0.148 | <u>RPS12</u>    | 0.505 | 0.191 | <u>ECM1</u>     |
| 0.566 | 0.185 | <u>FAM8A1</u>   | 0.504 | 0.191 | <u>ZNF32</u>    |
| 0.520 | 0.140 | <u>PHB</u>      | 0.501 | 0.190 | <u>IRAK1</u>    |
| 0.537 | 0.158 | <u>IRF6</u>     | 0.511 | 0.216 | <u>ILF2</u>     |
| 0.503 | 0.124 | <u>MSL3</u>     | 0.505 | 0.231 | <u>TRIM37</u>   |
| 0.504 | 0.125 | <u>ANPEP</u>    |       |       |                 |
| 0.516 | 0.137 | <u>POLD2</u>    |       |       |                 |
| 0.530 | 0.151 | <u>STK25</u>    |       |       |                 |
| 0.528 | 0.149 | <u>TMBIM6</u>   |       |       |                 |
| 0.561 | 0.182 | <u>MITF</u>     |       |       |                 |
| 0.528 | 0.150 | <u>SCML2</u>    |       |       |                 |
| 0.519 | 0.141 | <u>GTF3C3</u>   |       |       |                 |
| 0.521 | 0.144 | <u>SULT1C2</u>  |       |       |                 |

|       |       |                   |
|-------|-------|-------------------|
| 0.515 | 0.138 | C1ORF183          |
| 0.503 | 0.126 | <u>ERF</u>        |
| 0.534 | 0.157 | ZNF430            |
| 0.528 | 0.152 | <u>MTMR6</u>      |
| 0.505 | 0.129 | <u>ETV4</u>       |
| 0.514 | 0.138 | <u>NSDHL</u>      |
| 0.526 | 0.151 | <u>PNPLA4</u>     |
| 0.565 | 0.190 | C17ORF48          |
| 0.510 | 0.135 | <u>GTF2A2</u>     |
| 0.519 | 0.144 | <u>ACADL</u>      |
| 0.521 | 0.147 | <u>ABCB7</u>      |
| 0.512 | 0.138 | <u>HIP1R</u>      |
| 0.509 | 0.135 | <u>PON3</u>       |
| 0.532 | 0.159 | NRSN2             |
| 0.534 | 0.160 | <u>SYBU</u>       |
| 0.513 | 0.140 | <u>ATMIN</u>      |
| 0.519 | 0.146 | ZKSCAN5           |
| 0.508 | 0.135 | <u>CD55</u>       |
| 0.530 | 0.157 | <u>SLC30A3</u>    |
| 0.540 | 0.167 | <u>OFD1</u>       |
| 0.535 | 0.162 | <u>RAP2C</u>      |
| 0.520 | 0.148 | <u>TNK1</u>       |
| 0.523 | 0.150 | <u>CUTC</u>       |
| 0.506 | 0.133 | <u>CLCN5</u>      |
| 0.523 | 0.151 | <u>SETD1A</u>     |
| 0.501 | 0.129 | <u>SAV1</u>       |
| 0.505 | 0.134 | <u>FAM86B1</u>    |
| 0.514 | 0.143 | <u>FAM60A</u>     |
| 0.520 | 0.149 | <u>KIAA0664L3</u> |
| 0.521 | 0.150 | <u>F13A1</u>      |
| 0.547 | 0.177 | <u>CUX1</u>       |
| 0.502 | 0.133 | <u>PLEKHM2</u>    |
| 0.519 | 0.151 | <u>RWDD2B</u>     |
| 0.521 | 0.153 | <u>SPINT1</u>     |
| 0.504 | 0.136 | <u>TCL1B</u>      |
| 0.502 | 0.135 | <u>CCNF</u>       |
| 0.523 | 0.156 | <u>ALKBH4</u>     |
| 0.501 | 0.134 | <u>COL21A1</u>    |
| 0.560 | 0.194 | <u>MOK</u>        |
| 0.524 | 0.158 | <u>SUGP2</u>      |
| 0.504 | 0.138 | <u>IQCB1</u>      |
| 0.502 | 0.136 | <u>DDX31</u>      |
| 0.545 | 0.179 | <u>SLC25A24</u>   |
| 0.515 | 0.150 | <u>CGA</u>        |
| 0.515 | 0.151 | <u>SCAMP4</u>     |
| 0.509 | 0.146 | <u>ABCG2</u>      |
| 0.506 | 0.144 | <u>RPS13</u>      |

|       |       |                |
|-------|-------|----------------|
| 0.501 | 0.140 | <u>BAHD1</u>   |
| 0.503 | 0.142 | <u>RPH3A</u>   |
| 0.565 | 0.205 | <u>ECM2</u>    |
| 0.531 | 0.171 | <u>MTMR14</u>  |
| 0.502 | 0.142 | <u>CA2</u>     |
| 0.504 | 0.144 | <u>SNRNP40</u> |
| 0.526 | 0.169 | <u>SUN2</u>    |
| 0.506 | 0.148 | <u>MAX</u>     |
| 0.536 | 0.179 | <u>CD19</u>    |
| 0.501 | 0.144 | <u>SCG5</u>    |
| 0.527 | 0.170 | <u>LMF2</u>    |
| 0.503 | 0.147 | <u>RAD23B</u>  |
| 0.512 | 0.155 | <u>NPL</u>     |
| 0.504 | 0.147 | <u>RUNDC3A</u> |
| 0.511 | 0.155 | <u>OPHN1</u>   |
| 0.507 | 0.153 | <u>TMEM45A</u> |
| 0.517 | 0.163 | <u>CA11</u>    |
| 0.519 | 0.165 | <u>PTPN2</u>   |
| 0.533 | 0.179 | <u>MTHFS</u>   |
| 0.501 | 0.148 | <u>SYNE2</u>   |
| 0.501 | 0.149 | <u>TBC1D17</u> |
| 0.514 | 0.163 | <u>WBP2</u>    |
| 0.515 | 0.164 | <u>C3ORF18</u> |
| 0.508 | 0.158 | <u>MOBP</u>    |
| 0.502 | 0.153 | <u>RPL21</u>   |
| 0.505 | 0.156 | <u>PGM3</u>    |
| 0.514 | 0.167 | <u>ZNF142</u>  |
| 0.523 | 0.177 | <u>MPZ</u>     |
| 0.532 | 0.186 | <u>DUOX1</u>   |
| 0.505 | 0.159 | <u>TMCO3</u>   |
| 0.511 | 0.167 | <u>MUDENG</u>  |
| 0.517 | 0.173 | <u>ARMC1</u>   |
| 0.524 | 0.180 | <u>HEY2</u>    |
| 0.515 | 0.173 | <u>KRT33A</u>  |
| 0.534 | 0.192 | <u>NRGN</u>    |
| 0.525 | 0.184 | <u>ZNHIT6</u>  |
| 0.509 | 0.168 | <u>CDCP1</u>   |
| 0.518 | 0.177 | <u>CLASP1</u>  |
| 0.514 | 0.174 | <u>CD27</u>    |
| 0.514 | 0.174 | <u>NBR1</u>    |
| 0.505 | 0.165 | <u>PCDH8</u>   |
| 0.505 | 0.166 | <u>ATG4A</u>   |
| 0.503 | 0.164 | <u>WNT5A</u>   |
| 0.502 | 0.164 | <u>CPT1A</u>   |
| 0.502 | 0.164 | <u>TPRA1</u>   |
| 0.510 | 0.172 | <u>PRSS1</u>   |
| 0.501 | 0.163 | <u>SUCLG1</u>  |

|       |       |                |
|-------|-------|----------------|
| 0.511 | 0.176 | <u>ALDH5A1</u> |
| 0.518 | 0.183 | <u>PDGFRL</u>  |
| 0.512 | 0.178 | <u>RAB5B</u>   |
| 0.517 | 0.185 | <u>AIM2</u>    |
| 0.501 | 0.169 | <u>RPL13A</u>  |
| 0.511 | 0.180 | <u>TMOD3</u>   |
| 0.502 | 0.171 | <u>SLC16A4</u> |
| 0.502 | 0.171 | <u>ZFAND6</u>  |
| 0.545 | 0.215 | <u>NTRK2</u>   |
| 0.505 | 0.175 | <u>SCGB2A2</u> |
| 0.508 | 0.180 | <u>COQ9</u>    |
| 0.512 | 0.185 | <u>FAU</u>     |
| 0.501 | 0.177 | <u>ZNF529</u>  |
| 0.503 | 0.179 | <u>CCDC85C</u> |
| 0.505 | 0.182 | <u>HLA-DOB</u> |
| 0.505 | 0.184 | <u>ASXL1</u>   |
| 0.501 | 0.181 | <u>PPME1</u>   |
| 0.518 | 0.201 | <u>RALGAPB</u> |
| 0.501 | 0.183 | <u>KIFC3</u>   |
| 0.505 | 0.193 | <u>ENDOD1</u>  |
| 0.524 | 0.213 | <u>HRASLS</u>  |
| 0.509 | 0.206 | <u>GNL1</u>    |
| 0.508 | 0.212 | <u>EPHB6</u>   |
| 0.501 | 0.213 | <u>CA10</u>    |

### Combination prediction result

| <u>Name</u>     | <u>Overlap count</u> | <u>Up</u> | <u>Down</u> | <u>Result</u> |
|-----------------|----------------------|-----------|-------------|---------------|
| <u>ARMCX5</u>   | 6                    | 3         | 3           |               |
| <u>CHST15</u>   | 6                    | 2         | 4           |               |
| <u>DEK</u>      | 6                    | 2         | 4           |               |
| <u>FBXO42</u>   | 6                    | 3         | 3           |               |
| <u>FKBP5</u>    | 6                    | 3         | 3           |               |
| <u>GDPD5</u>    | 6                    | 4         | 2           |               |
| <u>H2AFJ</u>    | 6                    | 3         | 3           |               |
| <u>IVNS1ABP</u> | 6                    | 2         | 4           |               |
| <u>KIAA0753</u> | 6                    | 3         | 3           |               |
| <u>PDS5B</u>    | 6                    | 4         | 2           |               |
| <u>PLEC</u>     | 6                    | 2         | 4           |               |
| <u>POLI</u>     | 6                    | 3         | 3           |               |
| <u>PTPN2</u>    | 6                    | 3         | 3           |               |
| <u>SLC12A2</u>  | 6                    | 3         | 3           |               |
| <u>TACC1</u>    | 6                    | 4         | 2           |               |
| <u>TRIM33</u>   | 6                    | 3         | 3           |               |
| <u>UBE2C</u>    | 6                    | 3         | 3           |               |
| <u>ZNF45</u>    | 6                    | 3         | 3           |               |

|                  |   |   |   |  |
|------------------|---|---|---|--|
| <u>AASDHPPT</u>  | 5 | 2 | 3 |  |
| <u>ABHD10</u>    | 5 | 2 | 3 |  |
| <u>ABHD2</u>     | 5 | 3 | 2 |  |
| <u>ABHD3</u>     | 5 | 3 | 2 |  |
| <u>ANKZF1</u>    | 5 | 2 | 3 |  |
| <u>APPL1</u>     | 5 | 2 | 3 |  |
| <u>ASNA1</u>     | 5 | 3 | 2 |  |
| <u>ATF6</u>      | 5 | 3 | 2 |  |
| <u>BBX</u>       | 5 | 2 | 3 |  |
| <u>BCL7C</u>     | 5 | 2 | 3 |  |
| <u>BCLAF1</u>    | 5 | 3 | 2 |  |
| <u>CAT</u>       | 5 | 3 | 2 |  |
| <u>CBR4</u>      | 5 | 2 | 3 |  |
| <u>CCNO</u>      | 5 | 3 | 2 |  |
| <u>CEP57</u>     | 5 | 2 | 3 |  |
| <u>CLCN3</u>     | 5 | 2 | 3 |  |
| <u>CLINT1</u>    | 5 | 3 | 2 |  |
| <u>COQ9</u>      | 5 | 2 | 3 |  |
| <u>CSNK2A1</u>   | 5 | 3 | 2 |  |
| <u>CTSB</u>      | 5 | 2 | 3 |  |
| <u>DDX52</u>     | 5 | 3 | 2 |  |
| <u>DIO2</u>      | 5 | 2 | 3 |  |
| <u>DLG1</u>      | 5 | 3 | 2 |  |
| <u>DOCK4</u>     | 5 | 2 | 3 |  |
| <u>DYRK2</u>     | 5 | 2 | 3 |  |
| <u>EAF2</u>      | 5 | 2 | 3 |  |
| <u>EFNA3</u>     | 5 | 2 | 3 |  |
| <u>EIF5B</u>     | 5 | 2 | 3 |  |
| <u>EP300</u>     | 5 | 4 | 1 |  |
| <u>FDXR</u>      | 5 | 4 | 1 |  |
| <u>FHOD1</u>     | 5 | 2 | 3 |  |
| <u>FJX1</u>      | 5 | 2 | 3 |  |
| <u>FSCN1</u>     | 5 | 3 | 2 |  |
| <u>FTL</u>       | 5 | 2 | 3 |  |
| <u>G3BP2</u>     | 5 | 3 | 2 |  |
| <u>GABARAPL1</u> | 5 | 3 | 2 |  |
| <u>GABPA</u>     | 5 | 3 | 2 |  |
| <u>GALNT6</u>    | 5 | 2 | 3 |  |
| <u>GOLGA4</u>    | 5 | 3 | 2 |  |
| <u>GOSR1</u>     | 5 | 2 | 3 |  |
| <u>GRSF1</u>     | 5 | 2 | 3 |  |
| <u>HIBCH</u>     | 5 | 2 | 3 |  |
| <u>HIST1H3G</u>  | 5 | 3 | 2 |  |
| <u>HSD17B1</u>   | 5 | 3 | 2 |  |
| <u>ID1</u>       | 5 | 4 | 1 |  |
| <u>IL6ST</u>     | 5 | 3 | 2 |  |
| <u>IVL</u>       | 5 | 3 | 2 |  |
| <u>KRAS</u>      | 5 | 2 | 3 |  |

|                 |   |   |   |  |
|-----------------|---|---|---|--|
| <u>KRT10</u>    | 5 | 3 | 2 |  |
| <u>KRT18</u>    | 5 | 4 | 1 |  |
| <u>LIAS</u>     | 5 | 2 | 3 |  |
| <u>MAFB</u>     | 5 | 2 | 3 |  |
| <u>MAP3K9</u>   | 5 | 3 | 2 |  |
| <u>MED6</u>     | 5 | 3 | 2 |  |
| <u>METTL1</u>   | 5 | 2 | 3 |  |
| <u>MRPS31</u>   | 5 | 2 | 3 |  |
| <u>MTMR4</u>    | 5 | 2 | 3 |  |
| <u>MUC5AC</u>   | 5 | 3 | 2 |  |
| <u>N4BP2L2</u>  | 5 | 2 | 3 |  |
| <u>NACA</u>     | 5 | 2 | 3 |  |
| <u>NDE1</u>     | 5 | 2 | 3 |  |
| <u>NFKBIL1</u>  | 5 | 2 | 3 |  |
| <u>NPPB</u>     | 5 | 3 | 2 |  |
| <u>NR3C1</u>    | 5 | 2 | 3 |  |
| <u>NUBP1</u>    | 5 | 2 | 3 |  |
| <u>OAS1</u>     | 5 | 2 | 3 |  |
| <u>OPA1</u>     | 5 | 2 | 3 |  |
| <u>PCBP2</u>    | 5 | 2 | 3 |  |
| <u>PEX13</u>    | 5 | 3 | 2 |  |
| <u>PLAU</u>     | 5 | 3 | 2 |  |
| <u>PLSCR1</u>   | 5 | 2 | 3 |  |
| <u>PPME1</u>    | 5 | 3 | 2 |  |
| <u>PRPH</u>     | 5 | 3 | 2 |  |
| <u>PSMD3</u>    | 5 | 2 | 3 |  |
| <u>RAB2A</u>    | 5 | 2 | 3 |  |
| <u>RANGAP1</u>  | 5 | 3 | 2 |  |
| <u>RAPGEF2</u>  | 5 | 3 | 2 |  |
| <u>RBM12B</u>   | 5 | 2 | 3 |  |
| <u>RGS10</u>    | 5 | 3 | 2 |  |
| <u>RIT1</u>     | 5 | 3 | 2 |  |
| <u>RNF6</u>     | 5 | 2 | 3 |  |
| <u>SAFB2</u>    | 5 | 3 | 2 |  |
| <u>SAP30</u>    | 5 | 2 | 3 |  |
| <u>SF3A1</u>    | 5 | 3 | 2 |  |
| <u>SFTPC</u>    | 5 | 3 | 2 |  |
| <u>SIDT1</u>    | 5 | 3 | 2 |  |
| <u>SLC25A37</u> | 5 | 2 | 3 |  |
| <u>SLC39A4</u>  | 5 | 3 | 2 |  |
| <u>SLC39A8</u>  | 5 | 3 | 2 |  |
| <u>SMCHD1</u>   | 5 | 2 | 3 |  |
| <u>SPATA5L1</u> | 5 | 2 | 3 |  |
| <u>SREK1</u>    | 5 | 3 | 2 |  |
| <u>SSH1</u>     | 5 | 2 | 3 |  |
| <u>STK17A</u>   | 5 | 3 | 2 |  |
| <u>STK39</u>    | 5 | 2 | 3 |  |
| <u>STRN3</u>    | 5 | 3 | 2 |  |

|                 |   |   |   |  |
|-----------------|---|---|---|--|
| <u>TBC1D1</u>   | 5 | 3 | 2 |  |
| <u>THBS1</u>    | 5 | 3 | 2 |  |
| <u>TIPRL</u>    | 5 | 2 | 3 |  |
| <u>TLK1</u>     | 5 | 2 | 3 |  |
| <u>TMPRSS2</u>  | 5 | 4 | 1 |  |
| <u>TNFRSF1A</u> | 5 | 3 | 2 |  |
| <u>TOPORS</u>   | 5 | 3 | 2 |  |
| <u>TPRA1</u>    | 5 | 3 | 2 |  |
| <u>TTI1</u>     | 5 | 2 | 3 |  |
| <u>TUBA4A</u>   | 5 | 3 | 2 |  |
| <u>UBE2D3</u>   | 5 | 2 | 3 |  |
| <u>UCP2</u>     | 5 | 2 | 3 |  |
| <u>UNKL</u>     | 5 | 3 | 2 |  |
| <u>ZFAND5</u>   | 5 | 2 | 3 |  |
| <u>ZNF148</u>   | 5 | 3 | 2 |  |
| <u>ZNF184</u>   | 5 | 2 | 3 |  |
| <u>ZNF22</u>    | 5 | 2 | 3 |  |
| <u>ZNF236</u>   | 5 | 3 | 2 |  |
| <u>ZNF239</u>   | 5 | 2 | 3 |  |
| <u>ZNF277</u>   | 5 | 3 | 2 |  |
| <u>ZNF32</u>    | 5 | 2 | 3 |  |
| <u>ABCA11P</u>  | 4 | 3 | 1 |  |
| <u>ABCB6</u>    | 4 | 3 | 1 |  |
| <u>ABCG1</u>    | 4 | 2 | 2 |  |
| <u>ACAP1</u>    | 4 | 2 | 2 |  |
| <u>ACD</u>      | 4 | 1 | 3 |  |
| <u>ACSL3</u>    | 4 | 1 | 3 |  |
| <u>ACTR3</u>    | 4 | 2 | 2 |  |
| <u>ACTR3B</u>   | 4 | 1 | 3 |  |
| <u>ACTR6</u>    | 4 | 1 | 3 |  |
| <u>ADARB1</u>   | 4 | 2 | 2 |  |
| <u>ADH1C</u>    | 4 | 2 | 2 |  |
| <u>ADNP2</u>    | 4 | 2 | 2 |  |
| <u>ADO</u>      | 4 | 1 | 3 |  |
| <u>ADORA2B</u>  | 4 | 2 | 2 |  |
| <u>AFF1</u>     | 4 | 2 | 2 |  |
| <u>AFF4</u>     | 4 | 3 | 1 |  |
| <u>AHNAK</u>    | 4 | 1 | 3 |  |
| <u>AIMP1</u>    | 4 | 1 | 3 |  |
| <u>AIP</u>      | 4 | 2 | 2 |  |
| <u>AK2</u>      | 4 | 1 | 3 |  |
| <u>AKAP8</u>    | 4 | 2 | 2 |  |
| <u>AKIP1</u>    | 4 | 1 | 3 |  |
| <u>AKR1A1</u>   | 4 | 2 | 2 |  |
| <u>ALAD</u>     | 4 | 2 | 2 |  |
| <u>ALDH3B1</u>  | 4 | 1 | 3 |  |
| <u>ANKH</u>     | 4 | 2 | 2 |  |
| <u>ANKRD12</u>  | 4 | 3 | 1 |  |

|                 |   |   |   |  |
|-----------------|---|---|---|--|
| <u>ANKRD27</u>  | 4 | 2 | 2 |  |
| <u>ANKRD49</u>  | 4 | 2 | 2 |  |
| <u>ANO1</u>     | 4 | 2 | 2 |  |
| <u>ANPEP</u>    | 4 | 2 | 2 |  |
| <u>ANXA2P3</u>  | 4 | 2 | 2 |  |
| <u>AP1M2</u>    | 4 | 2 | 2 |  |
| <u>AP1S2</u>    | 4 | 2 | 2 |  |
| <u>APLNR</u>    | 4 | 2 | 2 |  |
| <u>APLP2</u>    | 4 | 3 | 1 |  |
| <u>APOE</u>     | 4 | 2 | 2 |  |
| <u>APPBP2</u>   | 4 | 2 | 2 |  |
| <u>APTX</u>     | 4 | 1 | 3 |  |
| <u>ARCN1</u>    | 4 | 2 | 2 |  |
| <u>ARFGAP2</u>  | 4 | 2 | 2 |  |
| <u>ARFIP1</u>   | 4 | 3 | 1 |  |
| <u>ARFIP2</u>   | 4 | 2 | 2 |  |
| <u>ARMC6</u>    | 4 | 2 | 2 |  |
| <u>ARNT2</u>    | 4 | 1 | 3 |  |
| <u>ARPC3</u>    | 4 | 2 | 2 |  |
| <u>ASXL1</u>    | 4 | 2 | 2 |  |
| <u>ATG4A</u>    | 4 | 2 | 2 |  |
| <u>ATG5</u>     | 4 | 2 | 2 |  |
| <u>ATIC</u>     | 4 | 1 | 3 |  |
| <u>ATP13A2</u>  | 4 | 2 | 2 |  |
| <u>ATP5C1</u>   | 4 | 3 | 1 |  |
| <u>ATP5O</u>    | 4 | 2 | 2 |  |
| <u>ATXN7</u>    | 4 | 3 | 1 |  |
| <u>AURKA</u>    | 4 | 2 | 2 |  |
| <u>B4GALT3</u>  | 4 | 3 | 1 |  |
| <u>BBS7</u>     | 4 | 2 | 2 |  |
| <u>BCAS1</u>    | 4 | 2 | 2 |  |
| <u>BCL2L1</u>   | 4 | 1 | 3 |  |
| <u>BLVRA</u>    | 4 | 3 | 1 |  |
| <u>BMI1</u>     | 4 | 2 | 2 |  |
| <u>BMPR1A</u>   | 4 | 2 | 2 |  |
| <u>BNIP1</u>    | 4 | 2 | 2 |  |
| <u>BPIFA1</u>   | 4 | 2 | 2 |  |
| <u>BRD9</u>     | 4 | 3 | 1 |  |
| <u>BRE</u>      | 4 | 2 | 2 |  |
| <u>BRF2</u>     | 4 | 2 | 2 |  |
| <u>BTG1</u>     | 4 | 3 | 1 |  |
| <u>C14ORF45</u> | 4 | 2 | 2 |  |
| <u>C15ORF5</u>  | 4 | 2 | 2 |  |
| <u>C1ORF115</u> | 4 | 2 | 2 |  |
| <u>C1RL</u>     | 4 | 2 | 2 |  |
| <u>C3</u>       | 4 | 3 | 1 |  |
| <u>C4ORF29</u>  | 4 | 2 | 2 |  |
| <u>C5ORF22</u>  | 4 | 2 | 2 |  |

|                 |   |   |   |  |
|-----------------|---|---|---|--|
| <u>C8ORF4</u>   | 4 | 2 | 2 |  |
| <u>C9ORF116</u> | 4 | 2 | 2 |  |
| <u>C9ORF40</u>  | 4 | 1 | 3 |  |
| <u>CABYR</u>    | 4 | 2 | 2 |  |
| <u>CACNA2D3</u> | 4 | 2 | 2 |  |
| <u>CACYBP</u>   | 4 | 1 | 3 |  |
| <u>CAD</u>      | 4 | 2 | 2 |  |
| <u>CALM3</u>    | 4 | 2 | 2 |  |
| <u>CAMKK2</u>   | 4 | 3 | 1 |  |
| <u>CAND1</u>    | 4 | 1 | 3 |  |
| <u>CASC3</u>    | 4 | 2 | 2 |  |
| <u>CASP6</u>    | 4 | 2 | 2 |  |
| <u>CBLL1</u>    | 4 | 3 | 1 |  |
| <u>CBR3</u>     | 4 | 3 | 1 |  |
| <u>CCDC101</u>  | 4 | 1 | 3 |  |
| <u>CCHCR1</u>   | 4 | 2 | 2 |  |
| <u>CCL2</u>     | 4 | 2 | 2 |  |
| <u>CCNA2</u>    | 4 | 2 | 2 |  |
| <u>CCNE2</u>    | 4 | 3 | 1 |  |
| <u>CCNG2</u>    | 4 | 2 | 2 |  |
| <u>CCNL1</u>    | 4 | 2 | 2 |  |
| <u>CCNT1</u>    | 4 | 3 | 1 |  |
| <u>CCNT2</u>    | 4 | 3 | 1 |  |
| <u>CCT6A</u>    | 4 | 1 | 3 |  |
| <u>CD22</u>     | 4 | 2 | 2 |  |
| <u>CDC16</u>    | 4 | 1 | 3 |  |
| <u>CDC42EP2</u> | 4 | 1 | 3 |  |
| <u>CDCA4</u>    | 4 | 2 | 2 |  |
| <u>CDCP1</u>    | 4 | 2 | 2 |  |
| <u>CDK16</u>    | 4 | 3 | 1 |  |
| <u>CDK17</u>    | 4 | 3 | 1 |  |
| <u>CDK19</u>    | 4 | 3 | 1 |  |
| <u>CDR1</u>     | 4 | 2 | 2 |  |
| <u>CDR2L</u>    | 4 | 2 | 2 |  |
| <u>CEP290</u>   | 4 | 3 | 1 |  |
| <u>CEP63</u>    | 4 | 1 | 3 |  |
| <u>CETP</u>     | 4 | 2 | 2 |  |
| <u>CFDP1</u>    | 4 | 2 | 2 |  |
| <u>CGGBP1</u>   | 4 | 3 | 1 |  |
| <u>CHAF1A</u>   | 4 | 3 | 1 |  |
| <u>CHFR</u>     | 4 | 2 | 2 |  |
| <u>CHKB</u>     | 4 | 2 | 2 |  |
| <u>CHMP1B</u>   | 4 | 2 | 2 |  |
| <u>CIAPIN1</u>  | 4 | 1 | 3 |  |
| <u>CITED2</u>   | 4 | 2 | 2 |  |
| <u>CLASRP</u>   | 4 | 2 | 2 |  |
| <u>CLDN15</u>   | 4 | 2 | 2 |  |
| <u>CLEC11A</u>  | 4 | 2 | 2 |  |

|                |   |   |   |  |
|----------------|---|---|---|--|
| <u>CLMN</u>    | 4 | 2 | 2 |  |
| <u>CNN2</u>    | 4 | 2 | 2 |  |
| <u>CNPPD1</u>  | 4 | 2 | 2 |  |
| <u>COIL</u>    | 4 | 2 | 2 |  |
| <u>COL3A1</u>  | 4 | 2 | 2 |  |
| <u>COL5A1</u>  | 4 | 2 | 2 |  |
| <u>COL6A2</u>  | 4 | 2 | 2 |  |
| <u>COL6A3</u>  | 4 | 2 | 2 |  |
| <u>COPS7B</u>  | 4 | 2 | 2 |  |
| <u>CORO1C</u>  | 4 | 3 | 1 |  |
| <u>COX5B</u>   | 4 | 2 | 2 |  |
| <u>CPSF7</u>   | 4 | 2 | 2 |  |
| <u>CPT1A</u>   | 4 | 2 | 2 |  |
| <u>CRBN</u>    | 4 | 2 | 2 |  |
| <u>CREB1</u>   | 4 | 3 | 1 |  |
| <u>CREB5</u>   | 4 | 2 | 2 |  |
| <u>CREBL2</u>  | 4 | 1 | 3 |  |
| <u>CRNKL1</u>  | 4 | 1 | 3 |  |
| <u>CRYZ</u>    | 4 | 1 | 3 |  |
| <u>CSE1L</u>   | 4 | 2 | 2 |  |
| <u>CSRP2</u>   | 4 | 2 | 2 |  |
| <u>CSTF3</u>   | 4 | 3 | 1 |  |
| <u>CTAGE5</u>  | 4 | 2 | 2 |  |
| <u>CTGF</u>    | 4 | 2 | 2 |  |
| <u>CTR9</u>    | 4 | 2 | 2 |  |
| <u>CTSD</u>    | 4 | 1 | 3 |  |
| <u>CTSL2</u>   | 4 | 1 | 3 |  |
| <u>CTTN</u>    | 4 | 3 | 1 |  |
| <u>CUL4B</u>   | 4 | 2 | 2 |  |
| <u>CUZD1</u>   | 4 | 1 | 3 |  |
| <u>CYB5R1</u>  | 4 | 2 | 2 |  |
| <u>CYFIP2</u>  | 4 | 3 | 1 |  |
| <u>CYP11B2</u> | 4 | 3 | 1 |  |
| <u>CYP19A1</u> | 4 | 3 | 1 |  |
| <u>CYP20A1</u> | 4 | 2 | 2 |  |
| <u>CYP26A1</u> | 4 | 2 | 2 |  |
| <u>CYP26B1</u> | 4 | 2 | 2 |  |
| <u>CYR61</u>   | 4 | 2 | 2 |  |
| <u>DAZAP2</u>  | 4 | 2 | 2 |  |
| <u>DBN1</u>    | 4 | 2 | 2 |  |
| <u>DCAF17</u>  | 4 | 2 | 2 |  |
| <u>DCP1A</u>   | 4 | 2 | 2 |  |
| <u>DCP2</u>    | 4 | 1 | 3 |  |
| <u>DCUN1D2</u> | 4 | 2 | 2 |  |
| <u>DDIT4</u>   | 4 | 3 | 1 |  |
| <u>DDX1</u>    | 4 | 2 | 2 |  |
| <u>DDX19A</u>  | 4 | 1 | 3 |  |
| <u>DDX43</u>   | 4 | 3 | 1 |  |

|                |   |   |   |  |
|----------------|---|---|---|--|
| <u>DENND2D</u> | 4 | 2 | 2 |  |
| <u>DERL2</u>   | 4 | 2 | 2 |  |
| <u>DHX40</u>   | 4 | 1 | 3 |  |
| <u>DIAPH2</u>  | 4 | 2 | 2 |  |
| <u>DICER1</u>  | 4 | 2 | 2 |  |
| <u>DIEXF</u>   | 4 | 1 | 3 |  |
| <u>DIO1</u>    | 4 | 2 | 2 |  |
| <u>DIP2C</u>   | 4 | 2 | 2 |  |
| <u>DIXDC1</u>  | 4 | 2 | 2 |  |
| <u>DLAT</u>    | 4 | 2 | 2 |  |
| <u>DLG5</u>    | 4 | 2 | 2 |  |
| <u>DNAJA2</u>  | 4 | 2 | 2 |  |
| <u>DNAJB12</u> | 4 | 2 | 2 |  |
| <u>DNAJB2</u>  | 4 | 1 | 3 |  |
| <u>DNAJB4</u>  | 4 | 2 | 2 |  |
| <u>DNASE2</u>  | 4 | 1 | 3 |  |
| <u>DNASE2B</u> | 4 | 2 | 2 |  |
| <u>DNMT1</u>   | 4 | 1 | 3 |  |
| <u>DPF1</u>    | 4 | 2 | 2 |  |
| <u>DR1</u>     | 4 | 3 | 1 |  |
| <u>DSC2</u>    | 4 | 2 | 2 |  |
| <u>DSE</u>     | 4 | 1 | 3 |  |
| <u>DSG2</u>    | 4 | 2 | 2 |  |
| <u>DTX4</u>    | 4 | 2 | 2 |  |
| <u>DUS4L</u>   | 4 | 1 | 3 |  |
| <u>DUSP1</u>   | 4 | 3 | 1 |  |
| <u>DUSP3</u>   | 4 | 2 | 2 |  |
| <u>DYNC1H1</u> | 4 | 2 | 2 |  |
| <u>ECHDC2</u>  | 4 | 2 | 2 |  |
| <u>ECHDC3</u>  | 4 | 2 | 2 |  |
| <u>ECM1</u>    | 4 | 2 | 2 |  |
| <u>EED</u>     | 4 | 2 | 2 |  |
| <u>EEF1B2</u>  | 4 | 2 | 2 |  |
| <u>EFHC1</u>   | 4 | 2 | 2 |  |
| <u>EHBP1</u>   | 4 | 2 | 2 |  |
| <u>EHD1</u>    | 4 | 3 | 1 |  |
| <u>EHHADH</u>  | 4 | 2 | 2 |  |
| <u>EIF2AK2</u> | 4 | 2 | 2 |  |
| <u>EIF3A</u>   | 4 | 2 | 2 |  |
| <u>ELAVL1</u>  | 4 | 2 | 2 |  |
| <u>ELF2</u>    | 4 | 3 | 1 |  |
| <u>ELF3</u>    | 4 | 2 | 2 |  |
| <u>ELK4</u>    | 4 | 3 | 1 |  |
| <u>EMG1</u>    | 4 | 2 | 2 |  |
| <u>ENGASE</u>  | 4 | 3 | 1 |  |
| <u>ENO3</u>    | 4 | 2 | 2 |  |
| <u>ENOX2</u>   | 4 | 1 | 3 |  |
| <u>ERCC2</u>   | 4 | 1 | 3 |  |

|                 |   |   |   |  |
|-----------------|---|---|---|--|
| <u>ERCC5</u>    | 4 | 1 | 3 |  |
| <u>ERI2</u>     | 4 | 1 | 3 |  |
| <u>ETAA1</u>    | 4 | 1 | 3 |  |
| <u>ETS2</u>     | 4 | 1 | 3 |  |
| <u>ETV4</u>     | 4 | 2 | 2 |  |
| <u>EXOG</u>     | 4 | 3 | 1 |  |
| <u>FAIM</u>     | 4 | 2 | 2 |  |
| <u>FAM102A</u>  | 4 | 1 | 3 |  |
| <u>FAM110B</u>  | 4 | 2 | 2 |  |
| <u>FAM168B</u>  | 4 | 3 | 1 |  |
| <u>FAM171A1</u> | 4 | 2 | 2 |  |
| <u>FAM179B</u>  | 4 | 2 | 2 |  |
| <u>FAM46C</u>   | 4 | 2 | 2 |  |
| <u>FAM55C</u>   | 4 | 2 | 2 |  |
| <u>FASTKD1</u>  | 4 | 1 | 3 |  |
| <u>FAU</u>      | 4 | 2 | 2 |  |
| <u>FBXL12</u>   | 4 | 3 | 1 |  |
| <u>FEM1B</u>    | 4 | 1 | 3 |  |
| <u>FKBP11</u>   | 4 | 2 | 2 |  |
| <u>FLJ10038</u> | 4 | 2 | 2 |  |
| <u>FLRT3</u>    | 4 | 2 | 2 |  |
| <u>FLT3</u>     | 4 | 2 | 2 |  |
| <u>FNDC3B</u>   | 4 | 1 | 3 |  |
| <u>FOSL1</u>    | 4 | 3 | 1 |  |
| <u>FRAT2</u>    | 4 | 3 | 1 |  |
| <u>FRYL</u>     | 4 | 2 | 2 |  |
| <u>FUBP1</u>    | 4 | 1 | 3 |  |
| <u>FUT3</u>     | 4 | 2 | 2 |  |
| <u>GAA</u>      | 4 | 3 | 1 |  |
| <u>GADD45G</u>  | 4 | 2 | 2 |  |
| <u>GALE</u>     | 4 | 2 | 2 |  |
| <u>GART</u>     | 4 | 2 | 2 |  |
| <u>GATAD1</u>   | 4 | 2 | 2 |  |
| <u>GCLM</u>     | 4 | 3 | 1 |  |
| <u>GLUD2</u>    | 4 | 2 | 2 |  |
| <u>GMEB2</u>    | 4 | 2 | 2 |  |
| <u>GNA11</u>    | 4 | 2 | 2 |  |
| <u>GNG12</u>    | 4 | 2 | 2 |  |
| <u>GNMT</u>     | 4 | 3 | 1 |  |
| <u>GRB10</u>    | 4 | 1 | 3 |  |
| <u>GSN</u>      | 4 | 1 | 3 |  |
| <u>GSTM1</u>    | 4 | 2 | 2 |  |
| <u>H1FX</u>     | 4 | 2 | 2 |  |
| <u>H2AFY2</u>   | 4 | 2 | 2 |  |
| <u>HDGF</u>     | 4 | 2 | 2 |  |
| <u>HEATR6</u>   | 4 | 1 | 3 |  |
| <u>HEG1</u>     | 4 | 3 | 1 |  |
| <u>HERC2</u>    | 4 | 2 | 2 |  |

|                   |   |   |   |  |
|-------------------|---|---|---|--|
| <u>HERPUD1</u>    | 4 | 2 | 2 |  |
| <u>HGSNAT</u>     | 4 | 2 | 2 |  |
| <u>HIST1H1E</u>   | 4 | 2 | 2 |  |
| <u>HIST1H2AM</u>  | 4 | 3 | 1 |  |
| <u>HIST1H2BE</u>  | 4 | 3 | 1 |  |
| <u>HIST1H2BF</u>  | 4 | 2 | 2 |  |
| <u>HIST1H4E</u>   | 4 | 3 | 1 |  |
| <u>HIST1H4J</u>   | 4 | 3 | 1 |  |
| <u>HIST2H2AA3</u> | 4 | 3 | 1 |  |
| <u>HJURP</u>      | 4 | 3 | 1 |  |
| <u>HK1</u>        | 4 | 3 | 1 |  |
| <u>HLA-E</u>      | 4 | 2 | 2 |  |
| <u>HMGCR</u>      | 4 | 2 | 2 |  |
| <u>HN1L</u>       | 4 | 2 | 2 |  |
| <u>HNRNPA0</u>    | 4 | 3 | 1 |  |
| <u>HNRNPA3</u>    | 4 | 1 | 3 |  |
| <u>HPN</u>        | 4 | 3 | 1 |  |
| <u>HSDL2</u>      | 4 | 2 | 2 |  |
| <u>HSF2</u>       | 4 | 3 | 1 |  |
| <u>ID3</u>        | 4 | 3 | 1 |  |
| <u>IER3</u>       | 4 | 2 | 2 |  |
| <u>IER5</u>       | 4 | 2 | 2 |  |
| <u>IFIH1</u>      | 4 | 2 | 2 |  |
| <u>IFIT1</u>      | 4 | 3 | 1 |  |
| <u>IFIT3</u>      | 4 | 2 | 2 |  |
| <u>IFIT5</u>      | 4 | 2 | 2 |  |
| <u>IFT46</u>      | 4 | 1 | 3 |  |
| <u>IFT88</u>      | 4 | 2 | 2 |  |
| <u>IGFLR1</u>     | 4 | 2 | 2 |  |
| <u>IKBKAP</u>     | 4 | 1 | 3 |  |
| <u>IL11</u>       | 4 | 3 | 1 |  |
| <u>IL1R1</u>      | 4 | 2 | 2 |  |
| <u>IL24</u>       | 4 | 2 | 2 |  |
| <u>ILF2</u>       | 4 | 2 | 2 |  |
| <u>IMPACT</u>     | 4 | 1 | 3 |  |
| <u>INHBB</u>      | 4 | 1 | 3 |  |
| <u>INTS3</u>      | 4 | 2 | 2 |  |
| <u>IPPK</u>       | 4 | 2 | 2 |  |
| <u>IRAK1</u>      | 4 | 2 | 2 |  |
| <u>IRGQ</u>       | 4 | 3 | 1 |  |
| <u>ISL1</u>       | 4 | 2 | 2 |  |
| <u>IST1</u>       | 4 | 3 | 1 |  |
| <u>ITGA5</u>      | 4 | 1 | 3 |  |
| <u>ITGAV</u>      | 4 | 1 | 3 |  |
| <u>ITM2B</u>      | 4 | 2 | 2 |  |
| <u>ITPR2</u>      | 4 | 2 | 2 |  |
| <u>JAK2</u>       | 4 | 2 | 2 |  |
| <u>KAZALD1</u>    | 4 | 2 | 2 |  |

|                   |   |   |   |  |
|-------------------|---|---|---|--|
| <u>KBTD2</u>      | 4 | 2 | 2 |  |
| <u>KCNIP1</u>     | 4 | 2 | 2 |  |
| <u>KCNN4</u>      | 4 | 2 | 2 |  |
| <u>KCTD9</u>      | 4 | 2 | 2 |  |
| <u>KDELR3</u>     | 4 | 1 | 3 |  |
| <u>KIAA0182</u>   | 4 | 2 | 2 |  |
| <u>KIAA0430</u>   | 4 | 2 | 2 |  |
| <u>KIAA0485</u>   | 4 | 3 | 1 |  |
| <u>KIAA0664L3</u> | 4 | 2 | 2 |  |
| <u>KIAA1024</u>   | 4 | 2 | 2 |  |
| <u>KIAA1324</u>   | 4 | 2 | 2 |  |
| <u>KIF13B</u>     | 4 | 2 | 2 |  |
| <u>KIF1B</u>      | 4 | 2 | 2 |  |
| <u>KLHL9</u>      | 4 | 2 | 2 |  |
| <u>KLK7</u>       | 4 | 3 | 1 |  |
| <u>KPNA1</u>      | 4 | 2 | 2 |  |
| <u>KPNA6</u>      | 4 | 2 | 2 |  |
| <u>KRCC1</u>      | 4 | 1 | 3 |  |
| <u>KRT19</u>      | 4 | 2 | 2 |  |
| <u>KRT3</u>       | 4 | 2 | 2 |  |
| <u>KRT8</u>       | 4 | 3 | 1 |  |
| <u>KRT8P12</u>    | 4 | 2 | 2 |  |
| <u>LAD1</u>       | 4 | 2 | 2 |  |
| <u>LANCL1</u>     | 4 | 2 | 2 |  |
| <u>LGALS1</u>     | 4 | 2 | 2 |  |
| <u>LOC399491</u>  | 4 | 2 | 2 |  |
| <u>LOC81691</u>   | 4 | 1 | 3 |  |
| <u>LPCAT1</u>     | 4 | 2 | 2 |  |
| <u>LRCH4</u>      | 4 | 2 | 2 |  |
| <u>LRIG1</u>      | 4 | 2 | 2 |  |
| <u>LRP6</u>       | 4 | 3 | 1 |  |
| <u>LRRC41</u>     | 4 | 3 | 1 |  |
| <u>LRRC8D</u>     | 4 | 2 | 2 |  |
| <u>LRRC8E</u>     | 4 | 3 | 1 |  |
| <u>LSM14A</u>     | 4 | 1 | 3 |  |
| <u>M6PR</u>       | 4 | 2 | 2 |  |
| <u>MAGOHB</u>     | 4 | 2 | 2 |  |
| <u>MAP1S</u>      | 4 | 2 | 2 |  |
| <u>MAP2K5</u>     | 4 | 2 | 2 |  |
| <u>MAP3K5</u>     | 4 | 1 | 3 |  |
| <u>MAP3K7</u>     | 4 | 1 | 3 |  |
| <u>MAP7D1</u>     | 4 | 2 | 2 |  |
| <u>MAPK9</u>      | 4 | 2 | 2 |  |
| <u>MARCH8</u>     | 4 | 2 | 2 |  |
| <u>MAST4</u>      | 4 | 0 | 4 |  |
| <u>MAX</u>        | 4 | 1 | 3 |  |
| <u>MCL1</u>       | 4 | 1 | 3 |  |
| <u>MCM9</u>       | 4 | 2 | 2 |  |

|               |   |   |   |  |
|---------------|---|---|---|--|
| <u>MCMBP</u>  | 4 | 2 | 2 |  |
| <u>MED13</u>  | 4 | 2 | 2 |  |
| <u>MED13L</u> | 4 | 2 | 2 |  |
| <u>MED4</u>   | 4 | 2 | 2 |  |
| <u>MEIS1</u>  | 4 | 2 | 2 |  |
| <u>MEPCE</u>  | 4 | 1 | 3 |  |
| <u>MET</u>    | 4 | 3 | 1 |  |
| <u>METTL9</u> | 4 | 2 | 2 |  |
| <u>MEX3C</u>  | 4 | 2 | 2 |  |
| <u>MFAP1</u>  | 4 | 2 | 2 |  |
| <u>MICAL2</u> | 4 | 2 | 2 |  |
| <u>MIS12</u>  | 4 | 2 | 2 |  |
| <u>MKRN1</u>  | 4 | 2 | 2 |  |
| <u>MLEC</u>   | 4 | 2 | 2 |  |
| <u>MLF1</u>   | 4 | 1 | 3 |  |
| <u>MLPH</u>   | 4 | 1 | 3 |  |
| <u>MMADHC</u> | 4 | 2 | 2 |  |
| <u>MORC2</u>  | 4 | 1 | 3 |  |
| <u>MREG</u>   | 4 | 1 | 3 |  |
| <u>MRPL15</u> | 4 | 1 | 3 |  |
| <u>MRPL16</u> | 4 | 1 | 3 |  |
| <u>MRPL28</u> | 4 | 2 | 2 |  |
| <u>MRPS27</u> | 4 | 2 | 2 |  |
| <u>MRS2</u>   | 4 | 1 | 3 |  |
| <u>MRT04</u>  | 4 | 2 | 2 |  |
| <u>MSRB2</u>  | 4 | 2 | 2 |  |
| <u>MT1H</u>   | 4 | 2 | 2 |  |
| <u>MT1P2</u>  | 4 | 2 | 2 |  |
| <u>MTIF2</u>  | 4 | 2 | 2 |  |
| <u>MTMR6</u>  | 4 | 1 | 3 |  |
| <u>MUTYH</u>  | 4 | 1 | 3 |  |
| <u>MXD1</u>   | 4 | 3 | 1 |  |
| <u>MYBL1</u>  | 4 | 2 | 2 |  |
| <u>NAP1L2</u> | 4 | 2 | 2 |  |
| <u>NCAPG</u>  | 4 | 3 | 1 |  |
| <u>NCKAP1</u> | 4 | 2 | 2 |  |
| <u>NCOA1</u>  | 4 | 1 | 3 |  |
| <u>NEBL</u>   | 4 | 2 | 2 |  |
| <u>NEDD9</u>  | 4 | 2 | 2 |  |
| <u>NEMF</u>   | 4 | 2 | 2 |  |
| <u>NFAT5</u>  | 4 | 2 | 2 |  |
| <u>NFE2L1</u> | 4 | 2 | 2 |  |
| <u>NFE2L2</u> | 4 | 2 | 2 |  |
| <u>NFIC</u>   | 4 | 2 | 2 |  |
| <u>NFX1</u>   | 4 | 2 | 2 |  |
| <u>NFYA</u>   | 4 | 2 | 2 |  |
| <u>NINJ1</u>  | 4 | 2 | 2 |  |
| <u>NKX2-2</u> | 4 | 2 | 2 |  |

|                |   |   |   |  |
|----------------|---|---|---|--|
| <u>NME1</u>    | 4 | 2 | 2 |  |
| <u>NME7</u>    | 4 | 2 | 2 |  |
| <u>NR1D2</u>   | 4 | 2 | 2 |  |
| <u>NR2C2</u>   | 4 | 3 | 1 |  |
| <u>NR4A1</u>   | 4 | 3 | 1 |  |
| <u>NR4A2</u>   | 4 | 2 | 2 |  |
| <u>NSMAF</u>   | 4 | 1 | 3 |  |
| <u>NSUN5</u>   | 4 | 1 | 3 |  |
| <u>NTAN1</u>   | 4 | 1 | 3 |  |
| <u>NTHL1</u>   | 4 | 1 | 3 |  |
| <u>NXT1</u>    | 4 | 2 | 2 |  |
| <u>OAZ2</u>    | 4 | 1 | 3 |  |
| <u>OBFC1</u>   | 4 | 1 | 3 |  |
| <u>ODF2</u>    | 4 | 2 | 2 |  |
| <u>OGFR</u>    | 4 | 2 | 2 |  |
| <u>OPHN1</u>   | 4 | 2 | 2 |  |
| <u>OSBPL1A</u> | 4 | 1 | 3 |  |
| <u>OTUD4</u>   | 4 | 2 | 2 |  |
| <u>OXSM</u>    | 4 | 2 | 2 |  |
| <u>OXTR</u>    | 4 | 1 | 3 |  |
| <u>PAAF1</u>   | 4 | 1 | 3 |  |
| <u>PALLD</u>   | 4 | 2 | 2 |  |
| <u>PAPOLA</u>  | 4 | 2 | 2 |  |
| <u>PAQR3</u>   | 4 | 1 | 3 |  |
| <u>PARP2</u>   | 4 | 0 | 4 |  |
| <u>PARP4</u>   | 4 | 1 | 3 |  |
| <u>PATZ1</u>   | 4 | 3 | 1 |  |
| <u>PCGF3</u>   | 4 | 2 | 2 |  |
| <u>PCIF1</u>   | 4 | 3 | 1 |  |
| <u>PCMTD2</u>  | 4 | 1 | 3 |  |
| <u>PCP4</u>    | 4 | 2 | 2 |  |
| <u>PCTP</u>    | 4 | 2 | 2 |  |
| <u>PDCD5</u>   | 4 | 1 | 3 |  |
| <u>PDCD6</u>   | 4 | 2 | 2 |  |
| <u>PDE3B</u>   | 4 | 2 | 2 |  |
| <u>PDHA1</u>   | 4 | 1 | 3 |  |
| <u>PDK4</u>    | 4 | 2 | 2 |  |
| <u>PDLIM2</u>  | 4 | 3 | 1 |  |
| <u>PDLIM5</u>  | 4 | 3 | 1 |  |
| <u>PDP1</u>    | 4 | 2 | 2 |  |
| <u>PER2</u>    | 4 | 2 | 2 |  |
| <u>PES1</u>    | 4 | 2 | 2 |  |
| <u>PFKM</u>    | 4 | 2 | 2 |  |
| <u>PGM1</u>    | 4 | 3 | 1 |  |
| <u>PGRMC1</u>  | 4 | 2 | 2 |  |
| <u>PHB</u>     | 4 | 2 | 2 |  |
| <u>PHF10</u>   | 4 | 1 | 3 |  |
| <u>PHTF1</u>   | 4 | 2 | 2 |  |

|                 |   |   |   |  |
|-----------------|---|---|---|--|
| <u>PID1</u>     | 4 | 2 | 2 |  |
| <u>PIGA</u>     | 4 | 2 | 2 |  |
| <u>PIK3R1</u>   | 4 | 1 | 3 |  |
| <u>PIK3R3</u>   | 4 | 3 | 1 |  |
| <u>PIK3R4</u>   | 4 | 1 | 3 |  |
| <u>PIKFYVE</u>  | 4 | 1 | 3 |  |
| <u>PIP</u>      | 4 | 2 | 2 |  |
| <u>PLAUR</u>    | 4 | 1 | 3 |  |
| <u>PLEKHB1</u>  | 4 | 1 | 3 |  |
| <u>PLK1</u>     | 4 | 1 | 3 |  |
| <u>PLK3</u>     | 4 | 2 | 2 |  |
| <u>PLXNA3</u>   | 4 | 2 | 2 |  |
| <u>PNLIP</u>    | 4 | 2 | 2 |  |
| <u>PNMA1</u>    | 4 | 2 | 2 |  |
| <u>PNPO</u>     | 4 | 2 | 2 |  |
| <u>POLG2</u>    | 4 | 1 | 3 |  |
| <u>POLR2I</u>   | 4 | 2 | 2 |  |
| <u>POPCDC3</u>  | 4 | 2 | 2 |  |
| <u>POT1</u>     | 4 | 1 | 3 |  |
| <u>PP14571</u>  | 4 | 2 | 2 |  |
| <u>PPAP2B</u>   | 4 | 2 | 2 |  |
| <u>PPAT</u>     | 4 | 3 | 1 |  |
| <u>PPL</u>      | 4 | 2 | 2 |  |
| <u>PPM1A</u>    | 4 | 2 | 2 |  |
| <u>PPM1E</u>    | 4 | 3 | 1 |  |
| <u>PPP1R10</u>  | 4 | 1 | 3 |  |
| <u>PPP1R12A</u> | 4 | 2 | 2 |  |
| <u>PPP2R5C</u>  | 4 | 3 | 1 |  |
| <u>PPP3CC</u>   | 4 | 2 | 2 |  |
| <u>PPP6R1</u>   | 4 | 1 | 3 |  |
| <u>PPWD1</u>    | 4 | 2 | 2 |  |
| <u>PRCP</u>     | 4 | 2 | 2 |  |
| <u>PRDM10</u>   | 4 | 3 | 1 |  |
| <u>PROCR</u>    | 4 | 3 | 1 |  |
| <u>PRPF4B</u>   | 4 | 2 | 2 |  |
| <u>PRPF6</u>    | 4 | 3 | 1 |  |
| <u>PRPS1</u>    | 4 | 3 | 1 |  |
| <u>PRRG1</u>    | 4 | 2 | 2 |  |
| <u>PSMD7</u>    | 4 | 1 | 3 |  |
| <u>PSME4</u>    | 4 | 1 | 3 |  |
| <u>PSPH</u>     | 4 | 1 | 3 |  |
| <u>PTBP2</u>    | 4 | 2 | 2 |  |
| <u>PTCD3</u>    | 4 | 2 | 2 |  |
| <u>PTCRA</u>    | 4 | 2 | 2 |  |
| <u>PTMA</u>     | 4 | 2 | 2 |  |
| <u>PTPN11</u>   | 4 | 2 | 2 |  |
| <u>PTPN12</u>   | 4 | 3 | 1 |  |
| <u>PTPN9</u>    | 4 | 1 | 3 |  |

|                |   |   |   |  |
|----------------|---|---|---|--|
| <u>PTX3</u>    | 4 | 2 | 2 |  |
| <u>PUM2</u>    | 4 | 2 | 2 |  |
| <u>PUS7</u>    | 4 | 2 | 2 |  |
| <u>PWP1</u>    | 4 | 2 | 2 |  |
| <u>PWP2</u>    | 4 | 1 | 3 |  |
| <u>PYROXD1</u> | 4 | 1 | 3 |  |
| <u>QRICH1</u>  | 4 | 2 | 2 |  |
| <u>RAB14</u>   | 4 | 3 | 1 |  |
| <u>RAB20</u>   | 4 | 2 | 2 |  |
| <u>RAB40B</u>  | 4 | 2 | 2 |  |
| <u>RAB5C</u>   | 4 | 2 | 2 |  |
| <u>RAD23A</u>  | 4 | 2 | 2 |  |
| <u>RAD51D</u>  | 4 | 3 | 1 |  |
| <u>RAD9A</u>   | 4 | 2 | 2 |  |
| <u>RALGAPB</u> | 4 | 1 | 3 |  |
| <u>RAMP3</u>   | 4 | 2 | 2 |  |
| <u>RASL11B</u> | 4 | 2 | 2 |  |
| <u>RBL2</u>    | 4 | 1 | 3 |  |
| <u>RBM12</u>   | 4 | 1 | 3 |  |
| <u>RBM4</u>    | 4 | 2 | 2 |  |
| <u>RBM5</u>    | 4 | 2 | 2 |  |
| <u>RCHY1</u>   | 4 | 3 | 1 |  |
| <u>RCOR1</u>   | 4 | 3 | 1 |  |
| <u>RCOR3</u>   | 4 | 2 | 2 |  |
| <u>REEP1</u>   | 4 | 3 | 1 |  |
| <u>REG1B</u>   | 4 | 2 | 2 |  |
| <u>REPS2</u>   | 4 | 2 | 2 |  |
| <u>RETSAT</u>  | 4 | 2 | 2 |  |
| <u>RIBC2</u>   | 4 | 3 | 1 |  |
| <u>RIOK2</u>   | 4 | 1 | 3 |  |
| <u>RNF111</u>  | 4 | 3 | 1 |  |
| <u>RNF113A</u> | 4 | 1 | 3 |  |
| <u>RNF138</u>  | 4 | 2 | 2 |  |
| <u>RNF14</u>   | 4 | 1 | 3 |  |
| <u>RNF24</u>   | 4 | 3 | 1 |  |
| <u>RNFT2</u>   | 4 | 1 | 3 |  |
| <u>ROD1</u>    | 4 | 2 | 2 |  |
| <u>RPL13</u>   | 4 | 2 | 2 |  |
| <u>RPP14</u>   | 4 | 3 | 1 |  |
| <u>RRAGD</u>   | 4 | 2 | 2 |  |
| <u>RRP1</u>    | 4 | 1 | 3 |  |
| <u>RRP7A</u>   | 4 | 2 | 2 |  |
| <u>RTF1</u>    | 4 | 1 | 3 |  |
| <u>RUFY2</u>   | 4 | 2 | 2 |  |
| <u>RWDD3</u>   | 4 | 1 | 3 |  |
| <u>SAMM50</u>  | 4 | 2 | 2 |  |
| <u>SAR1A</u>   | 4 | 2 | 2 |  |
| <u>SCD5</u>    | 4 | 2 | 2 |  |

|                 |   |   |   |  |
|-----------------|---|---|---|--|
| <u>SCNN1A</u>   | 4 | 3 | 1 |  |
| <u>SDHAF1</u>   | 4 | 2 | 2 |  |
| <u>SEC22A</u>   | 4 | 2 | 2 |  |
| <u>SEC61A2</u>  | 4 | 2 | 2 |  |
| <u>SEC62</u>    | 4 | 2 | 2 |  |
| <u>SENP2</u>    | 4 | 2 | 2 |  |
| <u>SENP6</u>    | 4 | 2 | 2 |  |
| <u>SERPINB1</u> | 4 | 2 | 2 |  |
| <u>SETD1B</u>   | 4 | 1 | 3 |  |
| <u>SETD2</u>    | 4 | 3 | 1 |  |
| <u>SETD5</u>    | 4 | 2 | 2 |  |
| <u>SETD6</u>    | 4 | 1 | 3 |  |
| <u>SFXN3</u>    | 4 | 2 | 2 |  |
| <u>SGPP1</u>    | 4 | 2 | 2 |  |
| <u>SH3BGRL</u>  | 4 | 2 | 2 |  |
| <u>SH3D21</u>   | 4 | 2 | 2 |  |
| <u>SHOC2</u>    | 4 | 2 | 2 |  |
| <u>SIRT7</u>    | 4 | 2 | 2 |  |
| <u>SLBP</u>     | 4 | 2 | 2 |  |
| <u>SLC14A1</u>  | 4 | 2 | 2 |  |
| <u>SLC15A2</u>  | 4 | 4 | 0 |  |
| <u>SLC33A1</u>  | 4 | 1 | 3 |  |
| <u>SLC35E1</u>  | 4 | 2 | 2 |  |
| <u>SLC35E3</u>  | 4 | 2 | 2 |  |
| <u>SLC4A2</u>   | 4 | 2 | 2 |  |
| <u>SLC4A7</u>   | 4 | 3 | 1 |  |
| <u>SLC6A14</u>  | 4 | 2 | 2 |  |
| <u>SLC6A6</u>   | 4 | 2 | 2 |  |
| <u>SLCO3A1</u>  | 4 | 2 | 2 |  |
| <u>SLCO4A1</u>  | 4 | 3 | 1 |  |
| <u>SMAD1</u>    | 4 | 2 | 2 |  |
| <u>SMYD3</u>    | 4 | 2 | 2 |  |
| <u>SNN</u>      | 4 | 1 | 3 |  |
| <u>SNRPB2</u>   | 4 | 2 | 2 |  |
| <u>SORL1</u>    | 4 | 2 | 2 |  |
| <u>SOX4</u>     | 4 | 1 | 3 |  |
| <u>SP2</u>      | 4 | 3 | 1 |  |
| <u>SPAG16</u>   | 4 | 2 | 2 |  |
| <u>SPAST</u>    | 4 | 2 | 2 |  |
| <u>SPATA2L</u>  | 4 | 2 | 2 |  |
| <u>SPATA6</u>   | 4 | 2 | 2 |  |
| <u>SRSF5</u>    | 4 | 3 | 1 |  |
| <u>SRSF6</u>    | 4 | 1 | 3 |  |
| <u>ST20</u>     | 4 | 2 | 2 |  |
| <u>STAG2</u>    | 4 | 2 | 2 |  |
| <u>STAP2</u>    | 4 | 2 | 2 |  |
| <u>STARD7</u>   | 4 | 1 | 3 |  |
| <u>STEAP1</u>   | 4 | 2 | 2 |  |

|                  |   |   |   |  |
|------------------|---|---|---|--|
| <u>STK19</u>     | 4 | 2 | 2 |  |
| <u>STK3</u>      | 4 | 4 | 0 |  |
| <u>STX18</u>     | 4 | 1 | 3 |  |
| <u>SUGP2</u>     | 4 | 2 | 2 |  |
| <u>SULT1A2</u>   | 4 | 2 | 2 |  |
| <u>SURF1</u>     | 4 | 1 | 3 |  |
| <u>SYK</u>       | 4 | 2 | 2 |  |
| <u>SYNJ2</u>     | 4 | 3 | 1 |  |
| <u>TAC1</u>      | 4 | 2 | 2 |  |
| <u>TAF4B</u>     | 4 | 3 | 1 |  |
| <u>TAF5</u>      | 4 | 1 | 3 |  |
| <u>TAGLN</u>     | 4 | 2 | 2 |  |
| <u>TAOK2</u>     | 4 | 2 | 2 |  |
| <u>TBC1D5</u>    | 4 | 2 | 2 |  |
| <u>TBCC</u>      | 4 | 2 | 2 |  |
| <u>TBL1X</u>     | 4 | 2 | 2 |  |
| <u>TBL1XR1</u>   | 4 | 1 | 3 |  |
| <u>TCEA2</u>     | 4 | 1 | 3 |  |
| <u>TCEB1</u>     | 4 | 2 | 2 |  |
| <u>TCERG1</u>    | 4 | 2 | 2 |  |
| <u>TCF25</u>     | 4 | 3 | 1 |  |
| <u>TCHH</u>      | 4 | 3 | 1 |  |
| <u>TDP2</u>      | 4 | 1 | 3 |  |
| <u>TEAD1</u>     | 4 | 2 | 2 |  |
| <u>TERF1</u>     | 4 | 1 | 3 |  |
| <u>TERF2IP</u>   | 4 | 2 | 2 |  |
| <u>TFDP1</u>     | 4 | 2 | 2 |  |
| <u>THAP1</u>     | 4 | 2 | 2 |  |
| <u>THBD</u>      | 4 | 1 | 3 |  |
| <u>TIA1</u>      | 4 | 1 | 3 |  |
| <u>TIAL1</u>     | 4 | 2 | 2 |  |
| <u>TIMP3</u>     | 4 | 2 | 2 |  |
| <u>TIPARP</u>    | 4 | 2 | 2 |  |
| <u>TJAP1</u>     | 4 | 2 | 2 |  |
| <u>TMBIM4</u>    | 4 | 2 | 2 |  |
| <u>TMEM100</u>   | 4 | 2 | 2 |  |
| <u>TMEM185B</u>  | 4 | 2 | 2 |  |
| <u>TMEM194A</u>  | 4 | 2 | 2 |  |
| <u>TMEM222</u>   | 4 | 3 | 1 |  |
| <u>TMEM30A</u>   | 4 | 2 | 2 |  |
| <u>TMEM50B</u>   | 4 | 2 | 2 |  |
| <u>TMF1</u>      | 4 | 3 | 1 |  |
| <u>TMPRSS11D</u> | 4 | 2 | 2 |  |
| <u>TMSB10</u>    | 4 | 2 | 2 |  |
| <u>TMX1</u>      | 4 | 3 | 1 |  |
| <u>TNFAIP2</u>   | 4 | 3 | 1 |  |
| <u>TOR1AIP1</u>  | 4 | 3 | 1 |  |
| <u>TP53I3</u>    | 4 | 1 | 3 |  |

|                |   |   |   |  |
|----------------|---|---|---|--|
| <u>TPP2</u>    | 4 | 1 | 3 |  |
| <u>TPRKB</u>   | 4 | 2 | 2 |  |
| <u>TRAF4</u>   | 4 | 2 | 2 |  |
| <u>TRAF5</u>   | 4 | 1 | 3 |  |
| <u>TRAPPC8</u> | 4 | 2 | 2 |  |
| <u>TRIM13</u>  | 4 | 4 | 0 |  |
| <u>TRIM27</u>  | 4 | 1 | 3 |  |
| <u>TROVE2</u>  | 4 | 2 | 2 |  |
| <u>TSC22D1</u> | 4 | 2 | 2 |  |
| <u>TSN</u>     | 4 | 1 | 3 |  |
| <u>TTC4</u>    | 4 | 2 | 2 |  |
| <u>TUBB</u>    | 4 | 2 | 2 |  |
| <u>TUBGCP3</u> | 4 | 1 | 3 |  |
| <u>TUSC3</u>   | 4 | 1 | 3 |  |
| <u>TXNL4B</u>  | 4 | 2 | 2 |  |
| <u>U2AF1</u>   | 4 | 2 | 2 |  |
| <u>UBAP2L</u>  | 4 | 3 | 1 |  |
| <u>UBE2H</u>   | 4 | 2 | 2 |  |
| <u>UBE2M</u>   | 4 | 2 | 2 |  |
| <u>UBR2</u>    | 4 | 3 | 1 |  |
| <u>UBXN4</u>   | 4 | 2 | 2 |  |
| <u>UFL1</u>    | 4 | 2 | 2 |  |
| <u>UQCRCF1</u> | 4 | 2 | 2 |  |
| <u>USP46</u>   | 4 | 2 | 2 |  |
| <u>USP47</u>   | 4 | 3 | 1 |  |
| <u>USP9X</u>   | 4 | 2 | 2 |  |
| <u>UTP14A</u>  | 4 | 2 | 2 |  |
| <u>VAMP4</u>   | 4 | 2 | 2 |  |
| <u>VAV1</u>    | 4 | 3 | 1 |  |
| <u>VAV3</u>    | 4 | 1 | 3 |  |
| <u>VCL</u>     | 4 | 3 | 1 |  |
| <u>VIP</u>     | 4 | 2 | 2 |  |
| <u>VPS33B</u>  | 4 | 2 | 2 |  |
| <u>WAC</u>     | 4 | 2 | 2 |  |
| <u>WDR37</u>   | 4 | 1 | 3 |  |
| <u>WDR47</u>   | 4 | 2 | 2 |  |
| <u>WDR5B</u>   | 4 | 1 | 3 |  |
| <u>WDR70</u>   | 4 | 2 | 2 |  |
| <u>WDR77</u>   | 4 | 2 | 2 |  |
| <u>WDTIC1</u>  | 4 | 2 | 2 |  |
| <u>WISP2</u>   | 4 | 3 | 1 |  |
| <u>WRB</u>     | 4 | 1 | 3 |  |
| <u>WSB2</u>    | 4 | 1 | 3 |  |
| <u>YAF2</u>    | 4 | 2 | 2 |  |
| <u>YIPF6</u>   | 4 | 2 | 2 |  |
| <u>YTHDC1</u>  | 4 | 2 | 2 |  |
| <u>ZBED1</u>   | 4 | 2 | 2 |  |
| <u>ZBTB10</u>  | 4 | 1 | 3 |  |

|               |   |   |   |  |
|---------------|---|---|---|--|
| <u>ZBTB43</u> | 4 | 1 | 3 |  |
| <u>ZEB2</u>   | 4 | 2 | 2 |  |
| <u>ZFAND1</u> | 4 | 2 | 2 |  |
| <u>ZFX</u>    | 4 | 3 | 1 |  |
| ZKSCAN4       | 4 | 2 | 2 |  |
| ZNF146        | 4 | 2 | 2 |  |
| ZNF165        | 4 | 2 | 2 |  |
| ZNF189        | 4 | 1 | 3 |  |
| ZNF222        | 4 | 2 | 2 |  |
| ZNF23         | 4 | 2 | 2 |  |
| ZNF302        | 4 | 2 | 2 |  |
| ZNF318        | 4 | 2 | 2 |  |
| ZNF337        | 4 | 1 | 3 |  |
| ZNF384        | 4 | 2 | 2 |  |
| ZNF419        | 4 | 3 | 1 |  |
| ZNF473        | 4 | 1 | 3 |  |
| ZNF512B       | 4 | 2 | 2 |  |
| ZNF529        | 4 | 2 | 2 |  |
| ZNF551        | 4 | 2 | 2 |  |
| ZNF586        | 4 | 2 | 2 |  |
| ZNF646        | 4 | 2 | 2 |  |
| ZNF673        | 4 | 2 | 2 |  |
| ZNF7          | 4 | 1 | 3 |  |
| ZNF783        | 4 | 3 | 1 |  |
| ZNF787        | 4 | 2 | 2 |  |
| <u>AADAC</u>  | 3 | 1 | 2 |  |
| AAGAB         | 3 | 1 | 2 |  |
| <u>AARS</u>   | 3 | 0 | 3 |  |
| <u>AASS</u>   | 3 | 1 | 2 |  |
| <u>AATF</u>   | 3 | 2 | 1 |  |
| <u>ABAT</u>   | 3 | 2 | 1 |  |
| <u>ABCB8</u>  | 3 | 2 | 1 |  |
| <u>ABCF2</u>  | 3 | 1 | 2 |  |
| <u>ABCF3</u>  | 3 | 1 | 2 |  |
| <u>ABHD11</u> | 3 | 2 | 1 |  |
| <u>ABHD5</u>  | 3 | 1 | 2 |  |
| <u>ABLIM1</u> | 3 | 0 | 3 |  |
| <u>ABT1</u>   | 3 | 1 | 2 |  |
| <u>ACADL</u>  | 3 | 2 | 1 |  |
| <u>ACADS</u>  | 3 | 2 | 1 |  |
| <u>ACAP2</u>  | 3 | 1 | 2 |  |
| <u>ACAT1</u>  | 3 | 1 | 2 |  |
| <u>ACBD3</u>  | 3 | 1 | 2 |  |
| <u>ACIN1</u>  | 3 | 2 | 1 |  |
| <u>ACOT7</u>  | 3 | 2 | 1 |  |
| <u>ACOT8</u>  | 3 | 2 | 1 |  |
| <u>ACOT9</u>  | 3 | 1 | 2 |  |
| <u>ACOX1</u>  | 3 | 2 | 1 |  |

|                 |   |   |   |  |
|-----------------|---|---|---|--|
| <u>ACOX3</u>    | 3 | 2 | 1 |  |
| <u>ACP1</u>     | 3 | 1 | 2 |  |
| <u>ACP2</u>     | 3 | 1 | 2 |  |
| <u>ACP5</u>     | 3 | 2 | 1 |  |
| <u>ACSBG1</u>   | 3 | 1 | 2 |  |
| <u>ACSL4</u>    | 3 | 2 | 1 |  |
| <u>ACSL5</u>    | 3 | 2 | 1 |  |
| <u>ACSS3</u>    | 3 | 1 | 2 |  |
| <u>ACTA1</u>    | 3 | 2 | 1 |  |
| <u>ACTN4</u>    | 3 | 2 | 1 |  |
| <u>ACTR2</u>    | 3 | 2 | 1 |  |
| <u>ACVR1</u>    | 3 | 1 | 2 |  |
| <u>ACVR2A</u>   | 3 | 2 | 1 |  |
| <u>ADAM10</u>   | 3 | 1 | 2 |  |
| <u>ADAM8</u>    | 3 | 2 | 1 |  |
| <u>ADAMTS13</u> | 3 | 2 | 1 |  |
| <u>ADCK3</u>    | 3 | 1 | 2 |  |
| <u>ADCY6</u>    | 3 | 2 | 1 |  |
| <u>ADCY7</u>    | 3 | 1 | 2 |  |
| <u>ADCY9</u>    | 3 | 2 | 1 |  |
| <u>ADH5</u>     | 3 | 0 | 3 |  |
| <u>ADIPOR1</u>  | 3 | 1 | 2 |  |
| <u>ADIPOR2</u>  | 3 | 1 | 2 |  |
| <u>ADM</u>      | 3 | 2 | 1 |  |
| <u>ADRA2C</u>   | 3 | 1 | 2 |  |
| <u>ADSL</u>     | 3 | 1 | 2 |  |
| <u>AEBP1</u>    | 3 | 2 | 1 |  |
| <u>AFTPH</u>    | 3 | 2 | 1 |  |
| <u>AGER</u>     | 3 | 2 | 1 |  |
| <u>AGGF1</u>    | 3 | 1 | 2 |  |
| <u>AGK</u>      | 3 | 1 | 2 |  |
| <u>AGPAT3</u>   | 3 | 2 | 1 |  |
| <u>AGT</u>      | 3 | 2 | 1 |  |
| <u>AGXT2L1</u>  | 3 | 1 | 2 |  |
| <u>AHCTF1</u>   | 3 | 1 | 2 |  |
| <u>AHCY</u>     | 3 | 2 | 1 |  |
| <u>AHCYL2</u>   | 3 | 3 | 0 |  |
| <u>AHI1</u>     | 3 | 2 | 1 |  |
| <u>AHSA1</u>    | 3 | 0 | 3 |  |
| <u>AHSG</u>     | 3 | 2 | 1 |  |
| <u>AIFM1</u>    | 3 | 1 | 2 |  |
| <u>AIM2</u>     | 3 | 2 | 1 |  |
| <u>AKAP10</u>   | 3 | 2 | 1 |  |
| <u>AKAP12</u>   | 3 | 2 | 1 |  |
| <u>AKAP13</u>   | 3 | 3 | 0 |  |
| <u>AKAP9</u>    | 3 | 3 | 0 |  |
| <u>AKIRIN1</u>  | 3 | 1 | 2 |  |
| <u>AKR1B1</u>   | 3 | 1 | 2 |  |

|                 |   |   |   |  |
|-----------------|---|---|---|--|
| <u>AKR1B10</u>  | 3 | 2 | 1 |  |
| <u>AKTIP</u>    | 3 | 1 | 2 |  |
| <u>ALAS1</u>    | 3 | 1 | 2 |  |
| <u>ALCAM</u>    | 3 | 2 | 1 |  |
| <u>ALDH3A2</u>  | 3 | 2 | 1 |  |
| <u>ALDH4A1</u>  | 3 | 2 | 1 |  |
| <u>ALDH6A1</u>  | 3 | 1 | 2 |  |
| <u>ALG12</u>    | 3 | 2 | 1 |  |
| <u>ALG13</u>    | 3 | 1 | 2 |  |
| <u>ALG3</u>     | 3 | 1 | 2 |  |
| <u>ALKBH1</u>   | 3 | 2 | 1 |  |
| <u>ALMS1</u>    | 3 | 0 | 3 |  |
| <u>ALOX5AP</u>  | 3 | 2 | 1 |  |
| <u>ALPK3</u>    | 3 | 2 | 1 |  |
| <u>ALS2CL</u>   | 3 | 1 | 2 |  |
| <u>AMD1</u>     | 3 | 2 | 1 |  |
| <u>AMOTL2</u>   | 3 | 1 | 2 |  |
| <u>ANAPC10</u>  | 3 | 2 | 1 |  |
| <u>ANGEL2</u>   | 3 | 2 | 1 |  |
| <u>ANKHD1</u>   | 3 | 1 | 2 |  |
| <u>ANKMY2</u>   | 3 | 2 | 1 |  |
| <u>ANKRA2</u>   | 3 | 2 | 1 |  |
| <u>ANKRD10</u>  | 3 | 2 | 1 |  |
| <u>ANKRD17</u>  | 3 | 2 | 1 |  |
| <u>ANKRD26</u>  | 3 | 2 | 1 |  |
| <u>ANKRD28</u>  | 3 | 2 | 1 |  |
| <u>ANKRD36</u>  | 3 | 2 | 1 |  |
| <u>ANKRD57</u>  | 3 | 1 | 2 |  |
| <u>ANKRD6</u>   | 3 | 2 | 1 |  |
| <u>ANO3</u>     | 3 | 2 | 1 |  |
| <u>ANXA1</u>    | 3 | 1 | 2 |  |
| <u>ANXA2</u>    | 3 | 2 | 1 |  |
| <u>ANXA2P2</u>  | 3 | 1 | 2 |  |
| <u>AOX1</u>     | 3 | 1 | 2 |  |
| <u>AP1AR</u>    | 3 | 2 | 1 |  |
| <u>AP3M2</u>    | 3 | 1 | 2 |  |
| <u>AP3S1</u>    | 3 | 2 | 1 |  |
| <u>APAF1</u>    | 3 | 2 | 1 |  |
| <u>APBA2</u>    | 3 | 1 | 2 |  |
| <u>APEH</u>     | 3 | 2 | 1 |  |
| <u>APEX2</u>    | 3 | 2 | 1 |  |
| <u>APH1B</u>    | 3 | 1 | 2 |  |
| <u>API5</u>     | 3 | 1 | 2 |  |
| <u>APOBEC3B</u> | 3 | 2 | 1 |  |
| <u>APOC1</u>    | 3 | 3 | 0 |  |
| <u>APOC2</u>    | 3 | 2 | 1 |  |
| <u>APOD</u>     | 3 | 2 | 1 |  |
| <u>APOH</u>     | 3 | 1 | 2 |  |

|                  |   |   |   |  |
|------------------|---|---|---|--|
| <u>APOL1</u>     | 3 | 1 | 2 |  |
| <u>APOL2</u>     | 3 | 1 | 2 |  |
| <u>APOLD1</u>    | 3 | 1 | 2 |  |
| <u>APOOL</u>     | 3 | 1 | 2 |  |
| <u>AQP4</u>      | 3 | 2 | 1 |  |
| <u>AQP9</u>      | 3 | 1 | 2 |  |
| <u>AQR</u>       | 3 | 1 | 2 |  |
| <u>ARAP1</u>     | 3 | 2 | 1 |  |
| <u>ARC</u>       | 3 | 1 | 2 |  |
| <u>ARF6</u>      | 3 | 2 | 1 |  |
| <u>ARFGEF1</u>   | 3 | 2 | 1 |  |
| <u>ARFGEF2</u>   | 3 | 3 | 0 |  |
| <u>ARGLU1</u>    | 3 | 1 | 2 |  |
| <u>ARHGAP17</u>  | 3 | 1 | 2 |  |
| <u>ARHGAP19</u>  | 3 | 1 | 2 |  |
| <u>ARHGAP35</u>  | 3 | 3 | 0 |  |
| <u>ARHGAP4</u>   | 3 | 1 | 2 |  |
| <u>ARHGDIA</u>   | 3 | 1 | 2 |  |
| <u>ARHGEF12</u>  | 3 | 2 | 1 |  |
| <u>ARHGEF2</u>   | 3 | 0 | 3 |  |
| <u>ARHGEF26</u>  | 3 | 1 | 2 |  |
| <u>ARHGEF3</u>   | 3 | 2 | 1 |  |
| <u>ARHGEF7</u>   | 3 | 3 | 0 |  |
| <u>ARID1A</u>    | 3 | 3 | 0 |  |
| <u>ARID3A</u>    | 3 | 3 | 0 |  |
| <u>ARID4A</u>    | 3 | 2 | 1 |  |
| <u>ARID5B</u>    | 3 | 2 | 1 |  |
| <u>ARIH1</u>     | 3 | 2 | 1 |  |
| <u>ARIH2</u>     | 3 | 1 | 2 |  |
| <u>ARL1</u>      | 3 | 0 | 3 |  |
| <u>ARL2BP</u>    | 3 | 2 | 1 |  |
| <u>ARL4C</u>     | 3 | 2 | 1 |  |
| <u>ARL6IP4</u>   | 3 | 1 | 2 |  |
| <u>ARMC8</u>     | 3 | 1 | 2 |  |
| <u>ARNT</u>      | 3 | 3 | 0 |  |
| <u>ARNTL</u>     | 3 | 1 | 2 |  |
| <u>ARPP21</u>    | 3 | 2 | 1 |  |
| <u>ARRB1</u>     | 3 | 2 | 1 |  |
| <u>ASAP1-IT1</u> | 3 | 1 | 2 |  |
| <u>ASB1</u>      | 3 | 2 | 1 |  |
| <u>ASB6</u>      | 3 | 1 | 2 |  |
| <u>ASB9</u>      | 3 | 2 | 1 |  |
| <u>ASCC1</u>     | 3 | 1 | 2 |  |
| <u>ASCC2</u>     | 3 | 2 | 1 |  |
| <u>ASCC3</u>     | 3 | 2 | 1 |  |
| <u>ASH1L</u>     | 3 | 3 | 0 |  |
| <u>ASH2L</u>     | 3 | 1 | 2 |  |
| <u>ASPH</u>      | 3 | 2 | 1 |  |

|                 |   |   |   |  |
|-----------------|---|---|---|--|
| <u>ASTE1</u>    | 3 | 1 | 2 |  |
| <u>ASTN2</u>    | 3 | 1 | 2 |  |
| <u>ASXL2</u>    | 3 | 2 | 1 |  |
| <u>ATAD2B</u>   | 3 | 2 | 1 |  |
| <u>ATAD3A</u>   | 3 | 2 | 1 |  |
| <u>ATF2</u>     | 3 | 2 | 1 |  |
| <u>ATMIN</u>    | 3 | 0 | 3 |  |
| <u>ATP1B1</u>   | 3 | 2 | 1 |  |
| <u>ATP2A2</u>   | 3 | 1 | 2 |  |
| <u>ATP5G3</u>   | 3 | 1 | 2 |  |
| <u>ATP6V0A2</u> | 3 | 2 | 1 |  |
| <u>ATP6V0C</u>  | 3 | 2 | 1 |  |
| <u>ATP6V0E2</u> | 3 | 2 | 1 |  |
| <u>ATP6V1A</u>  | 3 | 1 | 2 |  |
| <u>ATP6V1C1</u> | 3 | 2 | 1 |  |
| <u>ATP6V1D</u>  | 3 | 3 | 0 |  |
| <u>ATP6V1H</u>  | 3 | 1 | 2 |  |
| <u>ATP9B</u>    | 3 | 2 | 1 |  |
| <u>ATRX</u>     | 3 | 3 | 0 |  |
| <u>ATXN1</u>    | 3 | 1 | 2 |  |
| <u>ATXN2L</u>   | 3 | 2 | 1 |  |
| <u>ATXN3</u>    | 3 | 2 | 1 |  |
| <u>ATXN7L3B</u> | 3 | 2 | 1 |  |
| <u>AURKB</u>    | 3 | 3 | 0 |  |
| <u>AVL9</u>     | 3 | 1 | 2 |  |
| <u>B2M</u>      | 3 | 1 | 2 |  |
| <u>B3GAT1</u>   | 3 | 2 | 1 |  |
| <u>B3GNT3</u>   | 3 | 1 | 2 |  |
| <u>B4GALT1</u>  | 3 | 2 | 1 |  |
| <u>B4GALT2</u>  | 3 | 2 | 1 |  |
| <u>BACH2</u>    | 3 | 2 | 1 |  |
| <u>BAG2</u>     | 3 | 2 | 1 |  |
| <u>BAG3</u>     | 3 | 1 | 2 |  |
| <u>BAIAP2</u>   | 3 | 3 | 0 |  |
| <u>BAMBI</u>    | 3 | 2 | 1 |  |
| <u>BANK1</u>    | 3 | 2 | 1 |  |
| <u>BANP</u>     | 3 | 2 | 1 |  |
| <u>BAP1</u>     | 3 | 1 | 2 |  |
| <u>BASP1</u>    | 3 | 2 | 1 |  |
| <u>BATF3</u>    | 3 | 2 | 1 |  |
| <u>BAZ2A</u>    | 3 | 3 | 0 |  |
| <u>BAZ2B</u>    | 3 | 3 | 0 |  |
| <u>BBC3</u>     | 3 | 1 | 2 |  |
| <u>BBS10</u>    | 3 | 1 | 2 |  |
| <u>BBS4</u>     | 3 | 2 | 1 |  |
| <u>BCAM</u>     | 3 | 2 | 1 |  |
| <u>BCKDHA</u>   | 3 | 2 | 1 |  |
| <u>BCL10</u>    | 3 | 2 | 1 |  |

|                  |   |   |   |  |
|------------------|---|---|---|--|
| <u>BCL11B</u>    | 3 | 2 | 1 |  |
| <u>BCL2</u>      | 3 | 2 | 1 |  |
| <u>BCL2L13</u>   | 3 | 2 | 1 |  |
| <u>BCORL1</u>    | 3 | 2 | 1 |  |
| <u>BCR</u>       | 3 | 2 | 1 |  |
| <u>BCS1L</u>     | 3 | 1 | 2 |  |
| <u>BDKRB2</u>    | 3 | 1 | 2 |  |
| <u>BFAR</u>      | 3 | 1 | 2 |  |
| <u>BICD1</u>     | 3 | 2 | 1 |  |
| <u>BICD2</u>     | 3 | 1 | 2 |  |
| <u>BID</u>       | 3 | 2 | 1 |  |
| <u>BIK</u>       | 3 | 2 | 1 |  |
| <u>BIN1</u>      | 3 | 3 | 0 |  |
| <u>BIN2</u>      | 3 | 2 | 1 |  |
| <u>BLM</u>       | 3 | 1 | 2 |  |
| <u>BLNK</u>      | 3 | 2 | 1 |  |
| <u>BNIP2</u>     | 3 | 2 | 1 |  |
| <u>BNIP3</u>     | 3 | 1 | 2 |  |
| <u>BPGM</u>      | 3 | 0 | 3 |  |
| <u>BPTF</u>      | 3 | 3 | 0 |  |
| <u>BRAP</u>      | 3 | 2 | 1 |  |
| <u>BRD4</u>      | 3 | 1 | 2 |  |
| <u>BRD7</u>      | 3 | 1 | 2 |  |
| <u>BRIP1</u>     | 3 | 2 | 1 |  |
| <u>BRIX1</u>     | 3 | 2 | 1 |  |
| <u>BRMS1</u>     | 3 | 2 | 1 |  |
| <u>BRWD1</u>     | 3 | 1 | 2 |  |
| BSPRY            | 3 | 1 | 2 |  |
| <u>BTAF1</u>     | 3 | 1 | 2 |  |
| <u>BTBD3</u>     | 3 | 2 | 1 |  |
| <u>BTG3</u>      | 3 | 1 | 2 |  |
| <u>BTN2A1</u>    | 3 | 2 | 1 |  |
| <u>BTN3A3</u>    | 3 | 2 | 1 |  |
| <u>BUB1</u>      | 3 | 3 | 0 |  |
| <u>BUB3</u>      | 3 | 1 | 2 |  |
| <u>BZW1</u>      | 3 | 3 | 0 |  |
| C10ORF26         | 3 | 1 | 2 |  |
| <u>C10ORF95</u>  | 3 | 1 | 2 |  |
| <u>C11ORF16</u>  | 3 | 1 | 2 |  |
| C11ORF61         | 3 | 2 | 1 |  |
| <u>C11ORF75</u>  | 3 | 2 | 1 |  |
| C12ORF11         | 3 | 2 | 1 |  |
| C12ORF51         | 3 | 1 | 2 |  |
| <u>C12ORF52</u>  | 3 | 1 | 2 |  |
| <u>C14ORF101</u> | 3 | 1 | 2 |  |
| C14ORF133        | 3 | 1 | 2 |  |
| C16ORF61         | 3 | 1 | 2 |  |
| C16ORF7          | 3 | 1 | 2 |  |

|                 |   |   |   |  |
|-----------------|---|---|---|--|
| C17ORF108       | 3 | 1 | 2 |  |
| C17ORF48        | 3 | 1 | 2 |  |
| C19ORF2         | 3 | 1 | 2 |  |
| <u>C19ORF21</u> | 3 | 2 | 1 |  |
| <u>C19ORF24</u> | 3 | 2 | 1 |  |
| <u>C1GALT1</u>  | 3 | 2 | 1 |  |
| <u>C1ORF174</u> | 3 | 2 | 1 |  |
| C1ORF183        | 3 | 1 | 2 |  |
| C1ORF38         | 3 | 2 | 1 |  |
| <u>C1ORF54</u>  | 3 | 1 | 2 |  |
| C1ORF9          | 3 | 1 | 2 |  |
| C20ORF103       | 3 | 1 | 2 |  |
| C20ORF11        | 3 | 2 | 1 |  |
| <u>C21ORF91</u> | 3 | 2 | 1 |  |
| <u>C22ORF29</u> | 3 | 2 | 1 |  |
| <u>C2CD3</u>    | 3 | 1 | 2 |  |
| <u>C2ORF18</u>  | 3 | 1 | 2 |  |
| C2ORF28         | 3 | 2 | 1 |  |
| <u>C2ORF47</u>  | 3 | 2 | 1 |  |
| <u>C3ORF14</u>  | 3 | 1 | 2 |  |
| <u>C3ORF18</u>  | 3 | 2 | 1 |  |
| <u>C4ORF27</u>  | 3 | 1 | 2 |  |
| <u>C4ORF34</u>  | 3 | 1 | 2 |  |
| <u>C5</u>       | 3 | 2 | 1 |  |
| C6ORF120        | 3 | 1 | 2 |  |
| C6ORF145        | 3 | 1 | 2 |  |
| <u>C6ORF47</u>  | 3 | 1 | 2 |  |
| <u>C6ORF48</u>  | 3 | 0 | 3 |  |
| C7ORF42         | 3 | 2 | 1 |  |
| C7ORF44         | 3 | 2 | 1 |  |
| C7ORF68         | 3 | 2 | 1 |  |
| C9ORF167        | 3 | 2 | 1 |  |
| <u>C9ORF91</u>  | 3 | 1 | 2 |  |
| <u>CA2</u>      | 3 | 1 | 2 |  |
| <u>CAB39</u>    | 3 | 1 | 2 |  |
| <u>CALM1</u>    | 3 | 3 | 0 |  |
| <u>CAMKMT</u>   | 3 | 2 | 1 |  |
| <u>CAMP</u>     | 3 | 1 | 2 |  |
| <u>CAMSAP1</u>  | 3 | 2 | 1 |  |
| <u>CAND2</u>    | 3 | 2 | 1 |  |
| <u>CANX</u>     | 3 | 2 | 1 |  |
| <u>CAP2</u>     | 3 | 2 | 1 |  |
| <u>CAPN9</u>    | 3 | 3 | 0 |  |
| <u>CARD10</u>   | 3 | 2 | 1 |  |
| <u>CARHSP1</u>  | 3 | 2 | 1 |  |
| <u>CASP7</u>    | 3 | 2 | 1 |  |
| <u>CASP8</u>    | 3 | 1 | 2 |  |
| <u>CASP9</u>    | 3 | 2 | 1 |  |

|                 |   |   |   |  |
|-----------------|---|---|---|--|
| <u>CAV1</u>     | 3 | 1 | 2 |  |
| <u>CBFA2T2</u>  | 3 | 2 | 1 |  |
| <u>CBFB</u>     | 3 | 1 | 2 |  |
| <u>CBLB</u>     | 3 | 2 | 1 |  |
| <u>CBY1</u>     | 3 | 1 | 2 |  |
| <u>CC2D1A</u>   | 3 | 3 | 0 |  |
| <u>CCDC15</u>   | 3 | 1 | 2 |  |
| <u>CCDC22</u>   | 3 | 2 | 1 |  |
| <u>CCDC28A</u>  | 3 | 1 | 2 |  |
| <u>CCDC85C</u>  | 3 | 1 | 2 |  |
| <u>CCDC88C</u>  | 3 | 2 | 1 |  |
| <u>CCDC90B</u>  | 3 | 1 | 2 |  |
| <u>CCDC93</u>   | 3 | 2 | 1 |  |
| <u>CCK</u>      | 3 | 1 | 2 |  |
| <u>CCL5</u>     | 3 | 2 | 1 |  |
| <u>CCNC</u>     | 3 | 1 | 2 |  |
| <u>CCNF</u>     | 3 | 1 | 2 |  |
| <u>CCNJ</u>     | 3 | 1 | 2 |  |
| <u>CCT2</u>     | 3 | 1 | 2 |  |
| <u>CCT5</u>     | 3 | 2 | 1 |  |
| <u>CD14</u>     | 3 | 2 | 1 |  |
| <u>CD164</u>    | 3 | 2 | 1 |  |
| <u>CD207</u>    | 3 | 2 | 1 |  |
| <u>CD38</u>     | 3 | 3 | 0 |  |
| <u>CD3D</u>     | 3 | 1 | 2 |  |
| <u>CD44</u>     | 3 | 1 | 2 |  |
| <u>CD47</u>     | 3 | 3 | 0 |  |
| <u>CD52</u>     | 3 | 1 | 2 |  |
| <u>CD59</u>     | 3 | 1 | 2 |  |
| <u>CD7</u>      | 3 | 2 | 1 |  |
| <u>CD80</u>     | 3 | 1 | 2 |  |
| <u>CDA</u>      | 3 | 2 | 1 |  |
| <u>CDC37</u>    | 3 | 1 | 2 |  |
| <u>CDC40</u>    | 3 | 2 | 1 |  |
| <u>CDC42EP1</u> | 3 | 1 | 2 |  |
| <u>CDC42EP4</u> | 3 | 1 | 2 |  |
| <u>CDH2</u>     | 3 | 2 | 1 |  |
| <u>CDH4</u>     | 3 | 2 | 1 |  |
| <u>CDK10</u>    | 3 | 2 | 1 |  |
| <u>CDK12</u>    | 3 | 3 | 0 |  |
| <u>CDK2</u>     | 3 | 1 | 2 |  |
| <u>CDK20</u>    | 3 | 1 | 2 |  |
| <u>CDK4</u>     | 3 | 1 | 2 |  |
| <u>CDK5RAP2</u> | 3 | 2 | 1 |  |
| <u>CDK5RAP3</u> | 3 | 1 | 2 |  |
| <u>CDK9</u>     | 3 | 2 | 1 |  |
| <u>CDKN1B</u>   | 3 | 1 | 2 |  |
| <u>CDKN2C</u>   | 3 | 1 | 2 |  |

|                |   |   |   |  |
|----------------|---|---|---|--|
| <u>CDT1</u>    | 3 | 2 | 1 |  |
| <u>CDV3</u>    | 3 | 1 | 2 |  |
| <u>CDYL</u>    | 3 | 2 | 1 |  |
| <u>CEACAM6</u> | 3 | 1 | 2 |  |
| <u>CEBPD</u>   | 3 | 2 | 1 |  |
| <u>CEBPG</u>   | 3 | 0 | 3 |  |
| <u>CEP152</u>  | 3 | 3 | 0 |  |
| <u>CEP192</u>  | 3 | 1 | 2 |  |
| <u>CEP250</u>  | 3 | 2 | 1 |  |
| <u>CEP350</u>  | 3 | 2 | 1 |  |
| <u>CEP70</u>   | 3 | 1 | 2 |  |
| <u>CEP76</u>   | 3 | 1 | 2 |  |
| <u>CEPT1</u>   | 3 | 1 | 2 |  |
| <u>CER1</u>    | 3 | 2 | 1 |  |
| <u>CERK</u>    | 3 | 2 | 1 |  |
| <u>CERS6</u>   | 3 | 1 | 2 |  |
| <u>CES3</u>    | 3 | 1 | 2 |  |
| <u>CETN3</u>   | 3 | 1 | 2 |  |
| <u>CGA</u>     | 3 | 2 | 1 |  |
| <u>CHD1</u>    | 3 | 2 | 1 |  |
| <u>CHD3</u>    | 3 | 3 | 0 |  |
| <u>CHD4</u>    | 3 | 2 | 1 |  |
| <u>CHEK1</u>   | 3 | 2 | 1 |  |
| <u>CHERP</u>   | 3 | 2 | 1 |  |
| <u>CHI3L2</u>  | 3 | 2 | 1 |  |
| <u>CHL1</u>    | 3 | 2 | 1 |  |
| <u>CHMP1A</u>  | 3 | 1 | 2 |  |
| <u>CHMP2B</u>  | 3 | 1 | 2 |  |
| <u>CHPF2</u>   | 3 | 1 | 2 |  |
| <u>CHRNE</u>   | 3 | 3 | 0 |  |
| <u>CHST10</u>  | 3 | 1 | 2 |  |
| <u>CHTOP</u>   | 3 | 2 | 1 |  |
| <u>CIAO1</u>   | 3 | 1 | 2 |  |
| <u>CIB1</u>    | 3 | 2 | 1 |  |
| <u>CINP</u>    | 3 | 2 | 1 |  |
| <u>CIR1</u>    | 3 | 1 | 2 |  |
| <u>CISH</u>    | 3 | 2 | 1 |  |
| <u>CIT</u>     | 3 | 2 | 1 |  |
| <u>CKAP5</u>   | 3 | 1 | 2 |  |
| <u>CKB</u>     | 3 | 2 | 1 |  |
| <u>CKS1B</u>   | 3 | 2 | 1 |  |
| <u>CKS2</u>    | 3 | 2 | 1 |  |
| <u>CLASP2</u>  | 3 | 2 | 1 |  |
| <u>CLCF1</u>   | 3 | 2 | 1 |  |
| <u>CLDN1</u>   | 3 | 2 | 1 |  |
| <u>CLDN4</u>   | 3 | 1 | 2 |  |
| <u>CLDN7</u>   | 3 | 2 | 1 |  |
| <u>CLDN8</u>   | 3 | 2 | 1 |  |

|                 |   |   |   |  |
|-----------------|---|---|---|--|
| <u>CLEC2D</u>   | 3 | 2 | 1 |  |
| <u>CLIC3</u>    | 3 | 1 | 2 |  |
| <u>CLIP1</u>    | 3 | 2 | 1 |  |
| <u>CLNS1A</u>   | 3 | 2 | 1 |  |
| <u>CLP1</u>     | 3 | 1 | 2 |  |
| <u>CLU</u>      | 3 | 1 | 2 |  |
| <u>CMAS</u>     | 3 | 1 | 2 |  |
| <u>CNNM3</u>    | 3 | 2 | 1 |  |
| <u>CNOT6</u>    | 3 | 2 | 1 |  |
| <u>CNOT8</u>    | 3 | 2 | 1 |  |
| <u>CNPY2</u>    | 3 | 1 | 2 |  |
| <u>CNPY4</u>    | 3 | 1 | 2 |  |
| <u>CNTN1</u>    | 3 | 2 | 1 |  |
| <u>CNTNAP2</u>  | 3 | 2 | 1 |  |
| <u>COCH</u>     | 3 | 2 | 1 |  |
| <u>COG4</u>     | 3 | 1 | 2 |  |
| <u>COG5</u>     | 3 | 1 | 2 |  |
| <u>COL11A1</u>  | 3 | 2 | 1 |  |
| <u>COL17A1</u>  | 3 | 1 | 2 |  |
| <u>COL4A3BP</u> | 3 | 1 | 2 |  |
| <u>COL5A2</u>   | 3 | 1 | 2 |  |
| <u>COL7A1</u>   | 3 | 1 | 2 |  |
| <u>COMMD3</u>   | 3 | 1 | 2 |  |
| <u>COPB2</u>    | 3 | 1 | 2 |  |
| <u>COPG</u>     | 3 | 1 | 2 |  |
| <u>COPS6</u>    | 3 | 2 | 1 |  |
| <u>COPS8</u>    | 3 | 1 | 2 |  |
| <u>COQ10B</u>   | 3 | 1 | 2 |  |
| <u>COQ4</u>     | 3 | 2 | 1 |  |
| <u>CORO2A</u>   | 3 | 2 | 1 |  |
| <u>COX16</u>    | 3 | 2 | 1 |  |
| <u>COX4I1</u>   | 3 | 1 | 2 |  |
| <u>CPA2</u>     | 3 | 2 | 1 |  |
| <u>CPD</u>      | 3 | 1 | 2 |  |
| <u>CPEB3</u>    | 3 | 2 | 1 |  |
| <u>CPNE1</u>    | 3 | 2 | 1 |  |
| <u>CPNE3</u>    | 3 | 2 | 1 |  |
| <u>CPS1</u>     | 3 | 1 | 2 |  |
| <u>CPSF1</u>    | 3 | 2 | 1 |  |
| <u>CPSF4</u>    | 3 | 0 | 3 |  |
| <u>CPT2</u>     | 3 | 0 | 3 |  |
| <u>CREB3</u>    | 3 | 1 | 2 |  |
| <u>CREBZF</u>   | 3 | 2 | 1 |  |
| <u>CRELD2</u>   | 3 | 3 | 0 |  |
| <u>CRKL</u>     | 3 | 3 | 0 |  |
| <u>CRNN</u>     | 3 | 2 | 1 |  |
| <u>CROCCP2</u>  | 3 | 2 | 1 |  |
| <u>CRP</u>      | 3 | 2 | 1 |  |

|                |   |   |   |  |
|----------------|---|---|---|--|
| <u>CRTAM</u>   | 3 | 2 | 1 |  |
| <u>CRTAP</u>   | 3 | 1 | 2 |  |
| <u>CRY2</u>    | 3 | 2 | 1 |  |
| <u>CRYL1</u>   | 3 | 1 | 2 |  |
| <u>CSDA</u>    | 3 | 2 | 1 |  |
| <u>CSDE1</u>   | 3 | 2 | 1 |  |
| <u>CSK</u>     | 3 | 0 | 3 |  |
| <u>CSNK1D</u>  | 3 | 2 | 1 |  |
| <u>CSNK1G2</u> | 3 | 2 | 1 |  |
| <u>CSNK1G3</u> | 3 | 2 | 1 |  |
| <u>CSNK2A2</u> | 3 | 1 | 2 |  |
| <u>CSPG5</u>   | 3 | 2 | 1 |  |
| <u>CSPP1</u>   | 3 | 2 | 1 |  |
| <u>CST3</u>    | 3 | 1 | 2 |  |
| <u>CSTF1</u>   | 3 | 2 | 1 |  |
| <u>CTBP1</u>   | 3 | 1 | 2 |  |
| <u>CTDP1</u>   | 3 | 2 | 1 |  |
| <u>CTDSP2</u>  | 3 | 2 | 1 |  |
| <u>CTNNA2</u>  | 3 | 2 | 1 |  |
| <u>CTNND2</u>  | 3 | 2 | 1 |  |
| <u>CTSE</u>    | 3 | 1 | 2 |  |
| <u>CTSK</u>    | 3 | 2 | 1 |  |
| <u>CUL4A</u>   | 3 | 1 | 2 |  |
| <u>CUL5</u>    | 3 | 1 | 2 |  |
| <u>CUX1</u>    | 3 | 2 | 1 |  |
| <u>CWC25</u>   | 3 | 2 | 1 |  |
| <u>CWF19L1</u> | 3 | 2 | 1 |  |
| <u>CXADR</u>   | 3 | 1 | 2 |  |
| <u>CXCL3</u>   | 3 | 1 | 2 |  |
| <u>CYB5R2</u>  | 3 | 1 | 2 |  |
| <u>CYBA</u>    | 3 | 2 | 1 |  |
| <u>CYBRD1</u>  | 3 | 1 | 2 |  |
| <u>CYP1B1</u>  | 3 | 1 | 2 |  |
| <u>CYP24A1</u> | 3 | 2 | 1 |  |
| <u>CYP27B1</u> | 3 | 2 | 1 |  |
| <u>CYP2B6</u>  | 3 | 3 | 0 |  |
| <u>CYP2C19</u> | 3 | 3 | 0 |  |
| <u>CYP2E1</u>  | 3 | 3 | 0 |  |
| <u>CYP3A4</u>  | 3 | 3 | 0 |  |
| <u>CYP4F2</u>  | 3 | 2 | 1 |  |
| <u>CYP51A1</u> | 3 | 1 | 2 |  |
| D4S234E        | 3 | 2 | 1 |  |
| <u>DACH1</u>   | 3 | 2 | 1 |  |
| <u>DAG1</u>    | 3 | 1 | 2 |  |
| <u>DAK</u>     | 3 | 2 | 1 |  |
| <u>DARS</u>    | 3 | 1 | 2 |  |
| DCAF10         | 3 | 1 | 2 |  |
| <u>DCAF8</u>   | 3 | 2 | 1 |  |

|                |   |   |   |  |
|----------------|---|---|---|--|
| <u>DCBLD2</u>  | 3 | 2 | 1 |  |
| <u>DCLRE1C</u> | 3 | 1 | 2 |  |
| <u>DCTN4</u>   | 3 | 1 | 2 |  |
| <u>DCUN1D1</u> | 3 | 1 | 2 |  |
| <u>DCUN1D4</u> | 3 | 2 | 1 |  |
| <u>DDAH2</u>   | 3 | 1 | 2 |  |
| <u>DDOST</u>   | 3 | 2 | 1 |  |
| <u>DDR GK1</u> | 3 | 1 | 2 |  |
| <u>DDX24</u>   | 3 | 1 | 2 |  |
| <u>DDX28</u>   | 3 | 2 | 1 |  |
| <u>DDX31</u>   | 3 | 1 | 2 |  |
| <u>DDX3X</u>   | 3 | 3 | 0 |  |
| <u>DDX49</u>   | 3 | 2 | 1 |  |
| <u>DDX54</u>   | 3 | 1 | 2 |  |
| <u>DDX58</u>   | 3 | 1 | 2 |  |
| <u>DEAF1</u>   | 3 | 1 | 2 |  |
| <u>DEGS1</u>   | 3 | 3 | 0 |  |
| <u>DENND4A</u> | 3 | 2 | 1 |  |
| <u>DENND4B</u> | 3 | 1 | 2 |  |
| <u>DENND4C</u> | 3 | 1 | 2 |  |
| <u>DENND5A</u> | 3 | 1 | 2 |  |
| <u>DENND5B</u> | 3 | 1 | 2 |  |
| <u>DERA</u>    | 3 | 2 | 1 |  |
| <u>DERL1</u>   | 3 | 1 | 2 |  |
| <u>DEXI</u>    | 3 | 2 | 1 |  |
| <u>DFFA</u>    | 3 | 2 | 1 |  |
| <u>DFFB</u>    | 3 | 0 | 3 |  |
| <u>DHRS1</u>   | 3 | 2 | 1 |  |
| <u>DHRS7B</u>  | 3 | 1 | 2 |  |
| <u>DIAPH1</u>  | 3 | 2 | 1 |  |
| <u>DIS3</u>    | 3 | 1 | 2 |  |
| <u>DLC1</u>    | 3 | 2 | 1 |  |
| <u>DLD</u>     | 3 | 2 | 1 |  |
| <u>DLG4</u>    | 3 | 1 | 2 |  |
| <u>DLGAP4</u>  | 3 | 2 | 1 |  |
| <u>DLGAP5</u>  | 3 | 2 | 1 |  |
| <u>DLX2</u>    | 3 | 2 | 1 |  |
| <u>DMBT1</u>   | 3 | 1 | 2 |  |
| <u>DMP1</u>    | 3 | 1 | 2 |  |
| <u>DMXL1</u>   | 3 | 1 | 2 |  |
| <u>DNAAF2</u>  | 3 | 1 | 2 |  |
| <u>DNAJB14</u> | 3 | 2 | 1 |  |
| <u>DNAJB6</u>  | 3 | 2 | 1 |  |
| <u>DNAJB9</u>  | 3 | 1 | 2 |  |
| <u>DNAJC10</u> | 3 | 1 | 2 |  |
| <u>DNAJC12</u> | 3 | 1 | 2 |  |
| <u>DNAJC13</u> | 3 | 2 | 1 |  |
| <u>DNAJC15</u> | 3 | 1 | 2 |  |

|                 |   |   |   |  |
|-----------------|---|---|---|--|
| <u>DNAJC24</u>  | 3 | 0 | 3 |  |
| <u>DNAJC3</u>   | 3 | 2 | 1 |  |
| <u>DNAJC7</u>   | 3 | 1 | 2 |  |
| <u>DNAJC8</u>   | 3 | 1 | 2 |  |
| <u>DNASE1L2</u> | 3 | 1 | 2 |  |
| <u>DNASE1L3</u> | 3 | 1 | 2 |  |
| <u>DND1</u>     | 3 | 1 | 2 |  |
| <u>DNMBP</u>    | 3 | 1 | 2 |  |
| <u>DNMT3B</u>   | 3 | 1 | 2 |  |
| <u>DOK1</u>     | 3 | 2 | 1 |  |
| <u>DOLPP1</u>   | 3 | 2 | 1 |  |
| <u>DPH5</u>     | 3 | 1 | 2 |  |
| <u>DPY19L1</u>  | 3 | 2 | 1 |  |
| <u>DPYSL2</u>   | 3 | 1 | 2 |  |
| <u>DRAM1</u>    | 3 | 2 | 1 |  |
| <u>DROSHA</u>   | 3 | 1 | 2 |  |
| <u>DSG1</u>     | 3 | 1 | 2 |  |
| <u>DST</u>      | 3 | 2 | 1 |  |
| <u>DSTN</u>     | 3 | 2 | 1 |  |
| <u>DTWD1</u>    | 3 | 1 | 2 |  |
| <u>DUSP13</u>   | 3 | 2 | 1 |  |
| <u>DUSP7</u>    | 3 | 2 | 1 |  |
| <u>DYNLT1</u>   | 3 | 1 | 2 |  |
| <u>E2F3</u>     | 3 | 2 | 1 |  |
| <u>E2F5</u>     | 3 | 2 | 1 |  |
| <u>E2F6</u>     | 3 | 1 | 2 |  |
| <u>EBAG9</u>    | 3 | 1 | 2 |  |
| <u>EBF2</u>     | 3 | 2 | 1 |  |
| <u>EBLN2</u>    | 3 | 2 | 1 |  |
| <u>EBP</u>      | 3 | 2 | 1 |  |
| <u>ECE1</u>     | 3 | 2 | 1 |  |
| <u>ECM2</u>     | 3 | 1 | 2 |  |
| <u>ECSIT</u>    | 3 | 2 | 1 |  |
| <u>EDEM2</u>    | 3 | 1 | 2 |  |
| <u>EDN1</u>     | 3 | 3 | 0 |  |
| <u>EDNRA</u>    | 3 | 3 | 0 |  |
| <u>EEA1</u>     | 3 | 3 | 0 |  |
| <u>EEF1D</u>    | 3 | 2 | 1 |  |
| <u>EFCAB2</u>   | 3 | 1 | 2 |  |
| <u>EFHD2</u>    | 3 | 2 | 1 |  |
| <u>EFNA4</u>    | 3 | 2 | 1 |  |
| <u>EFNB2</u>    | 3 | 1 | 2 |  |
| <u>EFR3A</u>    | 3 | 2 | 1 |  |
| <u>EFTUD1</u>   | 3 | 0 | 3 |  |
| <u>EGR2</u>     | 3 | 2 | 1 |  |
| <u>EGR3</u>     | 3 | 2 | 1 |  |
| <u>EHBP1L1</u>  | 3 | 2 | 1 |  |
| <u>EHD4</u>     | 3 | 1 | 2 |  |

|                  |   |   |   |  |
|------------------|---|---|---|--|
| <u>EIF1</u>      | 3 | 2 | 1 |  |
| <u>EIF1B</u>     | 3 | 2 | 1 |  |
| <u>EIF2B2</u>    | 3 | 2 | 1 |  |
| <u>EIF2B3</u>    | 3 | 0 | 3 |  |
| <u>EIF2C1</u>    | 3 | 2 | 1 |  |
| <u>EIF2C2</u>    | 3 | 2 | 1 |  |
| <u>EIF2C3</u>    | 3 | 2 | 1 |  |
| <u>EIF2S1</u>    | 3 | 2 | 1 |  |
| <u>EIF3D</u>     | 3 | 2 | 1 |  |
| <u>EIF3L</u>     | 3 | 2 | 1 |  |
| <u>EIF3M</u>     | 3 | 2 | 1 |  |
| <u>EIF4A2</u>    | 3 | 1 | 2 |  |
| <u>EIF4A3</u>    | 3 | 2 | 1 |  |
| <u>EIF4EBP2</u>  | 3 | 1 | 2 |  |
| <u>EIF4ENIF1</u> | 3 | 2 | 1 |  |
| <u>EIF4H</u>     | 3 | 1 | 2 |  |
| <u>ELAVL2</u>    | 3 | 2 | 1 |  |
| <u>ELAVL3</u>    | 3 | 2 | 1 |  |
| <u>ELF4</u>      | 3 | 2 | 1 |  |
| <u>ELF5</u>      | 3 | 2 | 1 |  |
| <u>ELK1</u>      | 3 | 3 | 0 |  |
| <u>ELK3</u>      | 3 | 2 | 1 |  |
| <u>ELMO2</u>     | 3 | 1 | 2 |  |
| <u>ELOVL4</u>    | 3 | 2 | 1 |  |
| <u>ELOVL6</u>    | 3 | 2 | 1 |  |
| <u>EMP2</u>      | 3 | 2 | 1 |  |
| <u>ENPEP</u>     | 3 | 2 | 1 |  |
| <u>ENPP1</u>     | 3 | 2 | 1 |  |
| <u>ENTPD2</u>    | 3 | 2 | 1 |  |
| <u>ENTPD3</u>    | 3 | 2 | 1 |  |
| <u>ENTPD6</u>    | 3 | 2 | 1 |  |
| <u>EPB49</u>     | 3 | 1 | 2 |  |
| <u>EPHA4</u>     | 3 | 3 | 0 |  |
| <u>EPHB3</u>     | 3 | 2 | 1 |  |
| <u>EPHB6</u>     | 3 | 1 | 2 |  |
| <u>EPHX3</u>     | 3 | 2 | 1 |  |
| <u>EPPK1</u>     | 3 | 1 | 2 |  |
| <u>EPS15</u>     | 3 | 1 | 2 |  |
| <u>ERC1</u>      | 3 | 3 | 0 |  |
| <u>ERCC3</u>     | 3 | 1 | 2 |  |
| <u>ERF</u>       | 3 | 2 | 1 |  |
| <u>ERGIC2</u>    | 3 | 0 | 3 |  |
| <u>ERH</u>       | 3 | 2 | 1 |  |
| <u>ERLIN1</u>    | 3 | 1 | 2 |  |
| <u>ERP44</u>     | 3 | 1 | 2 |  |
| <u>ESF1</u>      | 3 | 2 | 1 |  |
| <u>ETNK2</u>     | 3 | 1 | 2 |  |
| <u>ETV1</u>      | 3 | 2 | 1 |  |

|                 |   |   |   |  |
|-----------------|---|---|---|--|
| <u>EVL</u>      | 3 | 1 | 2 |  |
| <u>EXOC7</u>    | 3 | 3 | 0 |  |
| <u>EXOSC4</u>   | 3 | 3 | 0 |  |
| <u>EXOSC8</u>   | 3 | 0 | 3 |  |
| <u>EZR</u>      | 3 | 2 | 1 |  |
| <u>F11R</u>     | 3 | 2 | 1 |  |
| <u>F3</u>       | 3 | 2 | 1 |  |
| <u>F7</u>       | 3 | 3 | 0 |  |
| <u>FAAH</u>     | 3 | 2 | 1 |  |
| <u>FABP1</u>    | 3 | 2 | 1 |  |
| <u>FABP5</u>    | 3 | 2 | 1 |  |
| <u>FADD</u>     | 3 | 1 | 2 |  |
| <u>FAF2</u>     | 3 | 1 | 2 |  |
| <u>FAHD2A</u>   | 3 | 1 | 2 |  |
| <u>FAM107A</u>  | 3 | 1 | 2 |  |
| <u>FAM114A1</u> | 3 | 1 | 2 |  |
| <u>FAM114A2</u> | 3 | 1 | 2 |  |
| <u>FAM115A</u>  | 3 | 2 | 1 |  |
| <u>FAM117A</u>  | 3 | 1 | 2 |  |
| <u>FAM134B</u>  | 3 | 1 | 2 |  |
| <u>FAM158A</u>  | 3 | 2 | 1 |  |
| <u>FAM164A</u>  | 3 | 1 | 2 |  |
| <u>FAM168A</u>  | 3 | 2 | 1 |  |
| <u>FAM169A</u>  | 3 | 2 | 1 |  |
| <u>FAM172A</u>  | 3 | 1 | 2 |  |
| <u>FAM175B</u>  | 3 | 1 | 2 |  |
| <u>FAM178A</u>  | 3 | 2 | 1 |  |
| <u>FAM184A</u>  | 3 | 1 | 2 |  |
| <u>FAM189B</u>  | 3 | 2 | 1 |  |
| <u>FAM192A</u>  | 3 | 1 | 2 |  |
| <u>FAM193A</u>  | 3 | 2 | 1 |  |
| <u>FAM20B</u>   | 3 | 2 | 1 |  |
| <u>FAM30A</u>   | 3 | 2 | 1 |  |
| <u>FAM3A</u>    | 3 | 1 | 2 |  |
| <u>FAM3C</u>    | 3 | 2 | 1 |  |
| <u>FAM50B</u>   | 3 | 1 | 2 |  |
| <u>FAM57A</u>   | 3 | 2 | 1 |  |
| <u>FAM65A</u>   | 3 | 1 | 2 |  |
| <u>FAM70A</u>   | 3 | 1 | 2 |  |
| <u>FAM86C1</u>  | 3 | 1 | 2 |  |
| <u>FAM89B</u>   | 3 | 2 | 1 |  |
| <u>FANCI</u>    | 3 | 1 | 2 |  |
| <u>FARP2</u>    | 3 | 2 | 1 |  |
| <u>FARSA</u>    | 3 | 1 | 2 |  |
| <u>FASTKD2</u>  | 3 | 2 | 1 |  |
| <u>FBLN5</u>    | 3 | 2 | 1 |  |
| <u>FBN1</u>     | 3 | 2 | 1 |  |
| <u>FBP1</u>     | 3 | 1 | 2 |  |

|                |   |   |   |  |
|----------------|---|---|---|--|
| <u>FBR5</u>    | 3 | 2 | 1 |  |
| <u>FBXL4</u>   | 3 | 1 | 2 |  |
| <u>FBXL5</u>   | 3 | 2 | 1 |  |
| <u>FBXO2</u>   | 3 | 1 | 2 |  |
| <u>FBXO38</u>  | 3 | 2 | 1 |  |
| <u>FBXW11</u>  | 3 | 2 | 1 |  |
| <u>FBXW4</u>   | 3 | 2 | 1 |  |
| <u>FCER1A</u>  | 3 | 1 | 2 |  |
| <u>FCGR2A</u>  | 3 | 2 | 1 |  |
| <u>FECH</u>    | 3 | 2 | 1 |  |
| <u>FEZ1</u>    | 3 | 2 | 1 |  |
| <u>FGF1</u>    | 3 | 1 | 2 |  |
| <u>FGFR1OP</u> | 3 | 3 | 0 |  |
| <u>FGFR2</u>   | 3 | 2 | 1 |  |
| <u>FICD</u>    | 3 | 1 | 2 |  |
| <u>FIP1L1</u>  | 3 | 2 | 1 |  |
| <u>FKBP14</u>  | 3 | 1 | 2 |  |
| <u>FKBP15</u>  | 3 | 2 | 1 |  |
| <u>FKSG49</u>  | 3 | 1 | 2 |  |
| FLJ11710       | 3 | 2 | 1 |  |
| <u>FLNC</u>    | 3 | 2 | 1 |  |
| <u>FLOT1</u>   | 3 | 2 | 1 |  |
| <u>FMNL1</u>   | 3 | 2 | 1 |  |
| <u>FMO5</u>    | 3 | 1 | 2 |  |
| <u>FN3KRP</u>  | 3 | 2 | 1 |  |
| <u>FNBP1</u>   | 3 | 1 | 2 |  |
| <u>FNBP1L</u>  | 3 | 2 | 1 |  |
| <u>FNBP4</u>   | 3 | 1 | 2 |  |
| <u>FNDC3A</u>  | 3 | 1 | 2 |  |
| <u>FNDC4</u>   | 3 | 2 | 1 |  |
| <u>FNTA</u>    | 3 | 1 | 2 |  |
| <u>FOLH1</u>   | 3 | 2 | 1 |  |
| <u>FOS</u>     | 3 | 2 | 1 |  |
| <u>FOXC1</u>   | 3 | 2 | 1 |  |
| <u>FOXF1</u>   | 3 | 1 | 2 |  |
| <u>FOXG1</u>   | 3 | 2 | 1 |  |
| <u>FOXJ1</u>   | 3 | 2 | 1 |  |
| <u>FOXM1</u>   | 3 | 2 | 1 |  |
| <u>FOXN3</u>   | 3 | 1 | 2 |  |
| <u>FPGS</u>    | 3 | 1 | 2 |  |
| <u>FPR1</u>    | 3 | 2 | 1 |  |
| <u>FSTL1</u>   | 3 | 2 | 1 |  |
| <u>FSTL3</u>   | 3 | 3 | 0 |  |
| <u>FTSJ2</u>   | 3 | 1 | 2 |  |
| FTSJ3          | 3 | 1 | 2 |  |
| <u>FUCA1</u>   | 3 | 1 | 2 |  |
| <u>FUT1</u>    | 3 | 3 | 0 |  |
| <u>FUT4</u>    | 3 | 1 | 2 |  |

|                  |   |   |   |  |
|------------------|---|---|---|--|
| <u>FXC1</u>      | 3 | 1 | 2 |  |
| <u>FXN</u>       | 3 | 1 | 2 |  |
| <u>FXR1</u>      | 3 | 1 | 2 |  |
| <u>FXYD1</u>     | 3 | 2 | 1 |  |
| <u>FXYD3</u>     | 3 | 1 | 2 |  |
| <u>FXYD7</u>     | 3 | 1 | 2 |  |
| <u>FYB</u>       | 3 | 1 | 2 |  |
| <u>FYCO1</u>     | 3 | 2 | 1 |  |
| <u>FZD3</u>      | 3 | 2 | 1 |  |
| <u>FZD5</u>      | 3 | 2 | 1 |  |
| <u>FZD6</u>      | 3 | 1 | 2 |  |
| <u>FZD8</u>      | 3 | 2 | 1 |  |
| <u>GAB2</u>      | 3 | 2 | 1 |  |
| <u>GABARAPL3</u> | 3 | 3 | 0 |  |
| <u>GABPB1</u>    | 3 | 1 | 2 |  |
| <u>GABRA2</u>    | 3 | 2 | 1 |  |
| <u>GADD45B</u>   | 3 | 2 | 1 |  |
| <u>GAL</u>       | 3 | 3 | 0 |  |
| <u>GALNS</u>     | 3 | 1 | 2 |  |
| <u>GALNT11</u>   | 3 | 2 | 1 |  |
| <u>GALNT14</u>   | 3 | 1 | 2 |  |
| <u>GANAB</u>     | 3 | 2 | 1 |  |
| <u>GAP43</u>     | 3 | 1 | 2 |  |
| <u>GAPDH</u>     | 3 | 1 | 2 |  |
| <u>GAPDHS</u>    | 3 | 2 | 1 |  |
| <u>GAPVD1</u>    | 3 | 2 | 1 |  |
| <u>GAS2</u>      | 3 | 2 | 1 |  |
| <u>GAS7</u>      | 3 | 1 | 2 |  |
| <u>GATA2</u>     | 3 | 2 | 1 |  |
| <u>GATA4</u>     | 3 | 1 | 2 |  |
| <u>GATA6</u>     | 3 | 3 | 0 |  |
| <u>GATAD2A</u>   | 3 | 2 | 1 |  |
| <u>GBE1</u>      | 3 | 2 | 1 |  |
| <u>GCA</u>       | 3 | 2 | 1 |  |
| <u>GDF15</u>     | 3 | 2 | 1 |  |
| <u>GDF2</u>      | 3 | 2 | 1 |  |
| <u>GDI2</u>      | 3 | 2 | 1 |  |
| <u>GEMIN4</u>    | 3 | 1 | 2 |  |
| <u>GFAP</u>      | 3 | 1 | 2 |  |
| <u>GFRA2</u>     | 3 | 2 | 1 |  |
| <u>GGCX</u>      | 3 | 1 | 2 |  |
| <u>GGH</u>       | 3 | 3 | 0 |  |
| <u>GGPS1</u>     | 3 | 1 | 2 |  |
| <u>GIGYF2</u>    | 3 | 2 | 1 |  |
| <u>GIMAP6</u>    | 3 | 2 | 1 |  |
| <u>GIN1</u>      | 3 | 1 | 2 |  |
| <u>GJA1</u>      | 3 | 1 | 2 |  |
| <u>GLCE</u>      | 3 | 2 | 1 |  |

|                |   |   |   |  |
|----------------|---|---|---|--|
| <u>GLRB</u>    | 3 | 2 | 1 |  |
| <u>GLRX2</u>   | 3 | 0 | 3 |  |
| <u>GLRX3</u>   | 3 | 2 | 1 |  |
| <u>GLRX5</u>   | 3 | 1 | 2 |  |
| <u>GLT8D1</u>  | 3 | 0 | 3 |  |
| <u>GLTP</u>    | 3 | 1 | 2 |  |
| <u>GLTSCR1</u> | 3 | 2 | 1 |  |
| <u>GLUL</u>    | 3 | 2 | 1 |  |
| <u>GMCL1</u>   | 3 | 1 | 2 |  |
| <u>GNA12</u>   | 3 | 1 | 2 |  |
| <u>GNAI1</u>   | 3 | 1 | 2 |  |
| <u>GNAQ</u>    | 3 | 1 | 2 |  |
| <u>GNB2L1</u>  | 3 | 1 | 2 |  |
| <u>GNG7</u>    | 3 | 1 | 2 |  |
| <u>GNL3L</u>   | 3 | 2 | 1 |  |
| <u>GOLGA1</u>  | 3 | 2 | 1 |  |
| <u>GOLGA2</u>  | 3 | 1 | 2 |  |
| <u>GOLGA3</u>  | 3 | 1 | 2 |  |
| <u>GOLGA8A</u> | 3 | 2 | 1 |  |
| <u>GOLGB1</u>  | 3 | 1 | 2 |  |
| <u>GOLIM4</u>  | 3 | 0 | 3 |  |
| <u>GORASP2</u> | 3 | 0 | 3 |  |
| <u>GOT2</u>    | 3 | 1 | 2 |  |
| <u>GP1BB</u>   | 3 | 2 | 1 |  |
| <u>GPA33</u>   | 3 | 1 | 2 |  |
| <u>GPATCH1</u> | 3 | 2 | 1 |  |
| <u>GPATCH3</u> | 3 | 2 | 1 |  |
| <u>GPATCH8</u> | 3 | 1 | 2 |  |
| <u>GPC1</u>    | 3 | 2 | 1 |  |
| <u>GPC4</u>    | 3 | 1 | 2 |  |
| <u>GPD1</u>    | 3 | 1 | 2 |  |
| <u>GPD2</u>    | 3 | 2 | 1 |  |
| <u>GPLD1</u>   | 3 | 2 | 1 |  |
| <u>GPN2</u>    | 3 | 3 | 0 |  |
| <u>GPR107</u>  | 3 | 2 | 1 |  |
| <u>GPR19</u>   | 3 | 1 | 2 |  |
| <u>GPR20</u>   | 3 | 1 | 2 |  |
| <u>GPRC5A</u>  | 3 | 1 | 2 |  |
| <u>GPRC5C</u>  | 3 | 2 | 1 |  |
| <u>GPS2</u>    | 3 | 1 | 2 |  |
| <u>GPX2</u>    | 3 | 2 | 1 |  |
| <u>GRAMD4</u>  | 3 | 1 | 2 |  |
| <u>GRB2</u>    | 3 | 1 | 2 |  |
| <u>GRB7</u>    | 3 | 3 | 0 |  |
| <u>GREB1</u>   | 3 | 2 | 1 |  |
| <u>GREM2</u>   | 3 | 1 | 2 |  |
| <u>GRHL2</u>   | 3 | 2 | 1 |  |
| <u>GRHPR</u>   | 3 | 2 | 1 |  |

|                |   |   |   |  |
|----------------|---|---|---|--|
| <u>GRIA1</u>   | 3 | 2 | 1 |  |
| <u>GRINA</u>   | 3 | 2 | 1 |  |
| <u>GSDMD</u>   | 3 | 1 | 2 |  |
| <u>GSK3B</u>   | 3 | 2 | 1 |  |
| <u>GSTCD</u>   | 3 | 2 | 1 |  |
| <u>GSTM2</u>   | 3 | 2 | 1 |  |
| <u>GSTO1</u>   | 3 | 1 | 2 |  |
| <u>GSTP1</u>   | 3 | 2 | 1 |  |
| <u>GTF2A1</u>  | 3 | 2 | 1 |  |
| <u>GTF2B</u>   | 3 | 2 | 1 |  |
| <u>GTF2E1</u>  | 3 | 0 | 3 |  |
| <u>GTF2H2B</u> | 3 | 2 | 1 |  |
| <u>GTF3A</u>   | 3 | 0 | 3 |  |
| <u>GTF3C1</u>  | 3 | 2 | 1 |  |
| <u>GTPBP3</u>  | 3 | 1 | 2 |  |
| <u>GTPBP8</u>  | 3 | 3 | 0 |  |
| <u>GUCY1A3</u> | 3 | 1 | 2 |  |
| <u>GUSBP3</u>  | 3 | 1 | 2 |  |
| <u>GYG2</u>    | 3 | 2 | 1 |  |
| <u>H2AFV</u>   | 3 | 1 | 2 |  |
| <u>H2AFZ</u>   | 3 | 2 | 1 |  |
| <u>H2BFS</u>   | 3 | 1 | 2 |  |
| <u>H3F3B</u>   | 3 | 1 | 2 |  |
| <u>HABP4</u>   | 3 | 2 | 1 |  |
| <u>HADH</u>    | 3 | 2 | 1 |  |
| <u>HADHA</u>   | 3 | 1 | 2 |  |
| <u>HAL</u>     | 3 | 2 | 1 |  |
| <u>HAND1</u>   | 3 | 2 | 1 |  |
| <u>HAS1</u>    | 3 | 1 | 2 |  |
| <u>HAUS3</u>   | 3 | 1 | 2 |  |
| <u>HAUS5</u>   | 3 | 1 | 2 |  |
| <u>HAUS6</u>   | 3 | 2 | 1 |  |
| <u>HBS1L</u>   | 3 | 1 | 2 |  |
| <u>HBZ</u>     | 3 | 1 | 2 |  |
| <u>HCCS</u>    | 3 | 1 | 2 |  |
| <u>HCP5</u>    | 3 | 1 | 2 |  |
| <u>HDDC2</u>   | 3 | 1 | 2 |  |
| <u>HDHD1</u>   | 3 | 1 | 2 |  |
| <u>HDLBP</u>   | 3 | 1 | 2 |  |
| <u>HEBP1</u>   | 3 | 2 | 1 |  |
| <u>HECTD3</u>  | 3 | 1 | 2 |  |
| <u>HERC1</u>   | 3 | 1 | 2 |  |
| <u>HERC6</u>   | 3 | 1 | 2 |  |
| <u>HEY2</u>    | 3 | 1 | 2 |  |
| <u>HFE</u>     | 3 | 3 | 0 |  |
| <u>HGD</u>     | 3 | 2 | 1 |  |
| <u>HGS</u>     | 3 | 1 | 2 |  |
| <u>HHLA3</u>   | 3 | 1 | 2 |  |

|                  |   |   |   |  |
|------------------|---|---|---|--|
| <u>HIC1</u>      | 3 | 2 | 1 |  |
| <u>HIC2</u>      | 3 | 3 | 0 |  |
| <u>HINFP</u>     | 3 | 2 | 1 |  |
| <u>HIPK1</u>     | 3 | 2 | 1 |  |
| <u>HIST1H1D</u>  | 3 | 2 | 1 |  |
| <u>HIST1H2AI</u> | 3 | 2 | 1 |  |
| <u>HIST1H2BC</u> | 3 | 1 | 2 |  |
| <u>HIST1H2BH</u> | 3 | 2 | 1 |  |
| <u>HIST1H2BI</u> | 3 | 2 | 1 |  |
| <u>HIST1H2BK</u> | 3 | 3 | 0 |  |
| <u>HIST1H3F</u>  | 3 | 3 | 0 |  |
| <u>HIST1H4C</u>  | 3 | 2 | 1 |  |
| <u>HIST1H4D</u>  | 3 | 2 | 1 |  |
| <u>HIST1H4H</u>  | 3 | 3 | 0 |  |
| <u>HIST3H2A</u>  | 3 | 2 | 1 |  |
| <u>HIVEP2</u>    | 3 | 1 | 2 |  |
| <u>HIVEP3</u>    | 3 | 2 | 1 |  |
| <u>HK2</u>       | 3 | 1 | 2 |  |
| <u>HLA-C</u>     | 3 | 1 | 2 |  |
| <u>HLA-DRB1</u>  | 3 | 1 | 2 |  |
| <u>HLA-F</u>     | 3 | 1 | 2 |  |
| <u>HMBOX1</u>    | 3 | 2 | 1 |  |
| <u>HMG20A</u>    | 3 | 2 | 1 |  |
| <u>HMGCS1</u>    | 3 | 3 | 0 |  |
| <u>HMGN2</u>     | 3 | 2 | 1 |  |
| <u>HMGN3</u>     | 3 | 2 | 1 |  |
| <u>HMMR</u>      | 3 | 1 | 2 |  |
| <u>HMP19</u>     | 3 | 1 | 2 |  |
| <u>HNRNPA1</u>   | 3 | 1 | 2 |  |
| <u>HNRNPL</u>    | 3 | 1 | 2 |  |
| <u>HNRNPR</u>    | 3 | 1 | 2 |  |
| <u>HNRPDL</u>    | 3 | 2 | 1 |  |
| <u>HOOK1</u>     | 3 | 2 | 1 |  |
| <u>HOXA10</u>    | 3 | 2 | 1 |  |
| <u>HOXA3</u>     | 3 | 2 | 1 |  |
| <u>HOXA7</u>     | 3 | 3 | 0 |  |
| <u>HOXB13</u>    | 3 | 2 | 1 |  |
| <u>HOXC13</u>    | 3 | 2 | 1 |  |
| <u>HP</u>        | 3 | 1 | 2 |  |
| <u>HPS5</u>      | 3 | 0 | 3 |  |
| <u>HRAS</u>      | 3 | 1 | 2 |  |
| <u>HRASLS</u>    | 3 | 2 | 1 |  |
| <u>HS2ST1</u>    | 3 | 1 | 2 |  |
| <u>HSP90B1</u>   | 3 | 1 | 2 |  |
| <u>HSPA13</u>    | 3 | 1 | 2 |  |
| <u>HSPA1L</u>    | 3 | 2 | 1 |  |
| <u>HSPA2</u>     | 3 | 1 | 2 |  |
| <u>HSPA8</u>     | 3 | 2 | 1 |  |

|                |   |   |   |  |
|----------------|---|---|---|--|
| <u>HSPB8</u>   | 3 | 2 | 1 |  |
| <u>HSPBAP1</u> | 3 | 1 | 2 |  |
| <u>HTATIP2</u> | 3 | 1 | 2 |  |
| <u>HTR1F</u>   | 3 | 2 | 1 |  |
| <u>HUS1</u>    | 3 | 3 | 0 |  |
| <u>HUWE1</u>   | 3 | 2 | 1 |  |
| <u>HYAL2</u>   | 3 | 1 | 2 |  |
| <u>HYI</u>     | 3 | 1 | 2 |  |
| <u>ICAM3</u>   | 3 | 1 | 2 |  |
| <u>ICAM4</u>   | 3 | 1 | 2 |  |
| <u>ICOS</u>    | 3 | 1 | 2 |  |
| <u>ICT1</u>    | 3 | 2 | 1 |  |
| <u>ID2</u>     | 3 | 1 | 2 |  |
| <u>IDE</u>     | 3 | 1 | 2 |  |
| <u>IDH1</u>    | 3 | 1 | 2 |  |
| <u>IDH2</u>    | 3 | 1 | 2 |  |
| <u>IDH3A</u>   | 3 | 2 | 1 |  |
| <u>IDH3B</u>   | 3 | 2 | 1 |  |
| <u>IDS</u>     | 3 | 2 | 1 |  |
| <u>IER3IP1</u> | 3 | 1 | 2 |  |
| <u>IFI44</u>   | 3 | 2 | 1 |  |
| <u>IFI6</u>    | 3 | 2 | 1 |  |
| <u>IFIT2</u>   | 3 | 2 | 1 |  |
| <u>IFITM1</u>  | 3 | 2 | 1 |  |
| <u>IFITM3</u>  | 3 | 1 | 2 |  |
| <u>IFNAR2</u>  | 3 | 1 | 2 |  |
| <u>IFRD1</u>   | 3 | 0 | 3 |  |
| <u>IGF2R</u>   | 3 | 3 | 0 |  |
| <u>IGFBP5</u>  | 3 | 2 | 1 |  |
| <u>IGHMBP2</u> | 3 | 2 | 1 |  |
| <u>IGKC</u>    | 3 | 2 | 1 |  |
| IGKV3-20       | 3 | 2 | 1 |  |
| <u>IK</u>      | 3 | 1 | 2 |  |
| <u>IKBKG</u>   | 3 | 1 | 2 |  |
| <u>IKZF5</u>   | 3 | 2 | 1 |  |
| <u>IL13RA1</u> | 3 | 2 | 1 |  |
| <u>IL13RA2</u> | 3 | 2 | 1 |  |
| <u>IL15</u>    | 3 | 1 | 2 |  |
| <u>IL17RB</u>  | 3 | 2 | 1 |  |
| <u>IL1R2</u>   | 3 | 2 | 1 |  |
| <u>IL20RA</u>  | 3 | 1 | 2 |  |
| <u>IL21R</u>   | 3 | 2 | 1 |  |
| <u>IL6</u>     | 3 | 1 | 2 |  |
| <u>ILF3</u>    | 3 | 2 | 1 |  |
| <u>ILKAP</u>   | 3 | 1 | 2 |  |
| <u>ILVBL</u>   | 3 | 2 | 1 |  |
| <u>INADL</u>   | 3 | 3 | 0 |  |
| <u>INCENP</u>  | 3 | 2 | 1 |  |

|                |   |   |   |  |
|----------------|---|---|---|--|
| <u>INF2</u>    | 3 | 2 | 1 |  |
| <u>ING1</u>    | 3 | 2 | 1 |  |
| <u>INHBA</u>   | 3 | 2 | 1 |  |
| <u>INO80B</u>  | 3 | 1 | 2 |  |
| <u>INPP1</u>   | 3 | 2 | 1 |  |
| <u>INPP5E</u>  | 3 | 1 | 2 |  |
| <u>INPP5F</u>  | 3 | 1 | 2 |  |
| <u>INS</u>     | 3 | 1 | 2 |  |
| <u>INSR</u>    | 3 | 3 | 0 |  |
| <u>INTS12</u>  | 3 | 1 | 2 |  |
| <u>IP6K1</u>   | 3 | 2 | 1 |  |
| <u>IP6K2</u>   | 3 | 2 | 1 |  |
| <u>IPCEF1</u>  | 3 | 2 | 1 |  |
| <u>IPO5</u>    | 3 | 1 | 2 |  |
| <u>IPO7</u>    | 3 | 1 | 2 |  |
| <u>IPP</u>     | 3 | 1 | 2 |  |
| <u>IREB2</u>   | 3 | 2 | 1 |  |
| <u>IRF2BP1</u> | 3 | 1 | 2 |  |
| <u>IRF5</u>    | 3 | 1 | 2 |  |
| <u>IRS2</u>    | 3 | 1 | 2 |  |
| <u>IRX4</u>    | 3 | 1 | 2 |  |
| <u>ISG15</u>   | 3 | 2 | 1 |  |
| <u>ISOC2</u>   | 3 | 2 | 1 |  |
| <u>ITCH</u>    | 3 | 1 | 2 |  |
| <u>ITFG1</u>   | 3 | 2 | 1 |  |
| <u>ITGB6</u>   | 3 | 1 | 2 |  |
| <u>ITGB8</u>   | 3 | 1 | 2 |  |
| <u>ITGBL1</u>  | 3 | 1 | 2 |  |
| <u>ITIH2</u>   | 3 | 2 | 1 |  |
| <u>ITPKB</u>   | 3 | 1 | 2 |  |
| <u>ITSN1</u>   | 3 | 2 | 1 |  |
| <u>JMJD6</u>   | 3 | 2 | 1 |  |
| <u>KANK2</u>   | 3 | 2 | 1 |  |
| <u>KARS</u>    | 3 | 0 | 3 |  |
| <u>KAT8</u>    | 3 | 1 | 2 |  |
| <u>KATNB1</u>  | 3 | 1 | 2 |  |
| <u>KAZN</u>    | 3 | 2 | 1 |  |
| <u>KBTBD4</u>  | 3 | 1 | 2 |  |
| <u>KCMF1</u>   | 3 | 1 | 2 |  |
| <u>KCNG1</u>   | 3 | 1 | 2 |  |
| <u>KCNJ15</u>  | 3 | 2 | 1 |  |
| <u>KCNJ8</u>   | 3 | 2 | 1 |  |
| <u>KCNK1</u>   | 3 | 1 | 2 |  |
| <u>KCNK5</u>   | 3 | 1 | 2 |  |
| <u>KCTD3</u>   | 3 | 1 | 2 |  |
| <u>KDELC1</u>  | 3 | 1 | 2 |  |
| <u>KDELR1</u>  | 3 | 2 | 1 |  |
| <u>KDELR2</u>  | 3 | 1 | 2 |  |

|                  |   |   |   |  |
|------------------|---|---|---|--|
| <u>KDM5B</u>     | 3 | 2 | 1 |  |
| <u>KDSR</u>      | 3 | 2 | 1 |  |
| <u>KEAP1</u>     | 3 | 1 | 2 |  |
| <u>KHDRBS1</u>   | 3 | 1 | 2 |  |
| <u>KHNYN</u>     | 3 | 2 | 1 |  |
| <u>KIAA0040</u>  | 3 | 1 | 2 |  |
| <u>KIAA0226</u>  | 3 | 2 | 1 |  |
| <u>KIAA0247</u>  | 3 | 2 | 1 |  |
| <u>KIAA0355</u>  | 3 | 2 | 1 |  |
| <u>KIAA0754</u>  | 3 | 1 | 2 |  |
| <u>KIAA0894</u>  | 3 | 2 | 1 |  |
| <u>KIAA0895</u>  | 3 | 2 | 1 |  |
| <u>KIAA1109</u>  | 3 | 2 | 1 |  |
| <u>KIDINS220</u> | 3 | 3 | 0 |  |
| <u>KIF16B</u>    | 3 | 1 | 2 |  |
| <u>KIF18A</u>    | 3 | 2 | 1 |  |
| <u>KIF3A</u>     | 3 | 2 | 1 |  |
| <u>KIFAP3</u>    | 3 | 1 | 2 |  |
| <u>KIN</u>       | 3 | 1 | 2 |  |
| <u>KLC1</u>      | 3 | 2 | 1 |  |
| <u>KLF11</u>     | 3 | 1 | 2 |  |
| <u>KLF5</u>      | 3 | 1 | 2 |  |
| <u>KLHDC10</u>   | 3 | 1 | 2 |  |
| <u>KLHDC2</u>    | 3 | 1 | 2 |  |
| <u>KLHDC4</u>    | 3 | 1 | 2 |  |
| <u>KLHL20</u>    | 3 | 2 | 1 |  |
| <u>KLHL3</u>     | 3 | 1 | 2 |  |
| <u>KLK2</u>      | 3 | 3 | 0 |  |
| <u>KLK3</u>      | 3 | 2 | 1 |  |
| <u>KLKB1</u>     | 3 | 1 | 2 |  |
| <u>KMO</u>       | 3 | 2 | 1 |  |
| <u>KNG1</u>      | 3 | 1 | 2 |  |
| <u>KPNA3</u>     | 3 | 1 | 2 |  |
| <u>KPNA5</u>     | 3 | 2 | 1 |  |
| <u>KRIT1</u>     | 3 | 1 | 2 |  |
| <u>KRR1</u>      | 3 | 0 | 3 |  |
| <u>KRT14</u>     | 3 | 1 | 2 |  |
| <u>KRT16</u>     | 3 | 0 | 3 |  |
| <u>KRT17</u>     | 3 | 1 | 2 |  |
| <u>KRT34</u>     | 3 | 2 | 1 |  |
| <u>KRT5</u>      | 3 | 1 | 2 |  |
| <u>KRT6A</u>     | 3 | 3 | 0 |  |
| <u>KRT7</u>      | 3 | 2 | 1 |  |
| <u>KRT81</u>     | 3 | 2 | 1 |  |
| <u>L1CAM</u>     | 3 | 2 | 1 |  |
| <u>L1TD1</u>     | 3 | 2 | 1 |  |
| <u>LACTB2</u>    | 3 | 0 | 3 |  |
| <u>LAGE3</u>     | 3 | 1 | 2 |  |

|                  |   |   |   |  |
|------------------|---|---|---|--|
| <u>LAMA5</u>     | 3 | 2 | 1 |  |
| <u>LAMB1</u>     | 3 | 2 | 1 |  |
| <u>LANCL2</u>    | 3 | 1 | 2 |  |
| <u>LARP4B</u>    | 3 | 2 | 1 |  |
| <u>LCMT1</u>     | 3 | 0 | 3 |  |
| <u>LCMT2</u>     | 3 | 2 | 1 |  |
| <u>LDOC1</u>     | 3 | 2 | 1 |  |
| <u>LEF1</u>      | 3 | 2 | 1 |  |
| LEMD3            | 3 | 1 | 2 |  |
| <u>LEPROTL1</u>  | 3 | 1 | 2 |  |
| <u>LETM1</u>     | 3 | 2 | 1 |  |
| <u>LGALS3</u>    | 3 | 1 | 2 |  |
| <u>LGALS8</u>    | 3 | 2 | 1 |  |
| <u>LGALS9</u>    | 3 | 2 | 1 |  |
| <u>LGR4</u>      | 3 | 0 | 3 |  |
| <u>LHFPL2</u>    | 3 | 1 | 2 |  |
| <u>LHPP</u>      | 3 | 1 | 2 |  |
| <u>LHX2</u>      | 3 | 1 | 2 |  |
| <u>LIG4</u>      | 3 | 2 | 1 |  |
| <u>LIMA1</u>     | 3 | 2 | 1 |  |
| <u>LIMK2</u>     | 3 | 2 | 1 |  |
| <u>LIN7A</u>     | 3 | 1 | 2 |  |
| <u>LIN7C</u>     | 3 | 2 | 1 |  |
| <u>LINC00312</u> | 3 | 1 | 2 |  |
| LINC00342        | 3 | 2 | 1 |  |
| <u>LINC00472</u> | 3 | 2 | 1 |  |
| <u>LIPA</u>      | 3 | 2 | 1 |  |
| <u>LIPT1</u>     | 3 | 1 | 2 |  |
| <u>LMCD1</u>     | 3 | 1 | 2 |  |
| <u>LMNA</u>      | 3 | 2 | 1 |  |
| <u>LMNB1</u>     | 3 | 2 | 1 |  |
| LOC100127972     | 3 | 1 | 2 |  |
| LOC100506469     | 3 | 2 | 1 |  |
| LOC100508797     | 3 | 2 | 1 |  |
| LOC202181        | 3 | 2 | 1 |  |
| LOC282997        | 3 | 1 | 2 |  |
| LOC283683        | 3 | 1 | 2 |  |
| LOC390940        | 3 | 2 | 1 |  |
| <u>LOX</u>       | 3 | 1 | 2 |  |
| <u>LPHN2</u>     | 3 | 2 | 1 |  |
| <u>LPIN2</u>     | 3 | 2 | 1 |  |
| <u>LPPR2</u>     | 3 | 2 | 1 |  |
| LPPR3            | 3 | 2 | 1 |  |
| <u>LRFN4</u>     | 3 | 1 | 2 |  |
| <u>LRIF1</u>     | 3 | 1 | 2 |  |
| <u>LRP8</u>      | 3 | 2 | 1 |  |
| <u>LRRC16A</u>   | 3 | 1 | 2 |  |
| <u>LRRC31</u>    | 3 | 1 | 2 |  |

|                 |   |   |   |  |
|-----------------|---|---|---|--|
| <u>LRRC6</u>    | 3 | 2 | 1 |  |
| <u>LRRFIP2</u>  | 3 | 2 | 1 |  |
| <u>LRRN3</u>    | 3 | 2 | 1 |  |
| <u>LSM2</u>     | 3 | 1 | 2 |  |
| <u>LSS</u>      | 3 | 3 | 0 |  |
| <u>LTB</u>      | 3 | 1 | 2 |  |
| <u>LUC7L</u>    | 3 | 2 | 1 |  |
| <u>LUC7L3</u>   | 3 | 1 | 2 |  |
| <u>LUZP1</u>    | 3 | 1 | 2 |  |
| <u>LY86</u>     | 3 | 1 | 2 |  |
| <u>LYL1</u>     | 3 | 2 | 1 |  |
| <u>LYPD1</u>    | 3 | 2 | 1 |  |
| <u>LYPD3</u>    | 3 | 2 | 1 |  |
| <u>LYPLA1</u>   | 3 | 2 | 1 |  |
| <u>LYST</u>     | 3 | 3 | 0 |  |
| <u>LZTFL1</u>   | 3 | 1 | 2 |  |
| <u>LZTR1</u>    | 3 | 2 | 1 |  |
| <u>MACF1</u>    | 3 | 1 | 2 |  |
| <u>MAD2L1</u>   | 3 | 2 | 1 |  |
| <u>MAGEA1</u>   | 3 | 1 | 2 |  |
| <u>MAGEA10</u>  | 3 | 2 | 1 |  |
| <u>MAGEA3</u>   | 3 | 2 | 1 |  |
| <u>MAGEA5</u>   | 3 | 1 | 2 |  |
| <u>MAGEA6</u>   | 3 | 2 | 1 |  |
| <u>MAGEF1</u>   | 3 | 0 | 3 |  |
| <u>MAGT1</u>    | 3 | 1 | 2 |  |
| <u>MAK16</u>    | 3 | 0 | 3 |  |
| <u>MALT1</u>    | 3 | 1 | 2 |  |
| <u>MAML1</u>    | 3 | 2 | 1 |  |
| <u>MAN1A1</u>   | 3 | 2 | 1 |  |
| <u>MANSC1</u>   | 3 | 1 | 2 |  |
| <u>MAP1B</u>    | 3 | 1 | 2 |  |
| <u>MAP1LC3B</u> | 3 | 2 | 1 |  |
| <u>MAP2K3</u>   | 3 | 1 | 2 |  |
| <u>MAP3K1</u>   | 3 | 2 | 1 |  |
| <u>MAP3K4</u>   | 3 | 1 | 2 |  |
| <u>MAP3K8</u>   | 3 | 2 | 1 |  |
| <u>MAPK8</u>    | 3 | 2 | 1 |  |
| <u>MAPRE1</u>   | 3 | 2 | 1 |  |
| <u>MAPT</u>     | 3 | 2 | 1 |  |
| <u>MARCH6</u>   | 3 | 2 | 1 |  |
| <u>MARCKS</u>   | 3 | 1 | 2 |  |
| <u>MARK4</u>    | 3 | 1 | 2 |  |
| <u>MAST3</u>    | 3 | 1 | 2 |  |
| <u>MATK</u>     | 3 | 2 | 1 |  |
| <u>MATR3</u>    | 3 | 1 | 2 |  |
| <u>MAU2</u>     | 3 | 3 | 0 |  |
| <u>MBD1</u>     | 3 | 2 | 1 |  |

|                |   |   |   |  |
|----------------|---|---|---|--|
| <u>MBD5</u>    | 3 | 1 | 2 |  |
| <u>MBL2</u>    | 3 | 3 | 0 |  |
| <u>MBNL1</u>   | 3 | 2 | 1 |  |
| <u>MCOLN1</u>  | 3 | 1 | 2 |  |
| <u>MCRS1</u>   | 3 | 1 | 2 |  |
| <u>MDC1</u>    | 3 | 1 | 2 |  |
| <u>MDM1</u>    | 3 | 1 | 2 |  |
| <u>MDM2</u>    | 3 | 2 | 1 |  |
| <u>MED1</u>    | 3 | 2 | 1 |  |
| <u>MED15</u>   | 3 | 1 | 2 |  |
| <u>MED17</u>   | 3 | 1 | 2 |  |
| <u>MED18</u>   | 3 | 2 | 1 |  |
| <u>MEF2A</u>   | 3 | 2 | 1 |  |
| <u>MEG3</u>    | 3 | 2 | 1 |  |
| <u>MEGF9</u>   | 3 | 1 | 2 |  |
| <u>MEIS3P1</u> | 3 | 1 | 2 |  |
| <u>METAP2</u>  | 3 | 0 | 3 |  |
| <u>METTL10</u> | 3 | 2 | 1 |  |
| <u>METTL13</u> | 3 | 1 | 2 |  |
| <u>METTL2B</u> | 3 | 1 | 2 |  |
| <u>METTL3</u>  | 3 | 1 | 2 |  |
| <u>METTL4</u>  | 3 | 1 | 2 |  |
| <u>METTL5</u>  | 3 | 1 | 2 |  |
| <u>METTL7A</u> | 3 | 1 | 2 |  |
| <u>MFAP3</u>   | 3 | 3 | 0 |  |
| <u>MFAP3L</u>  | 3 | 2 | 1 |  |
| <u>MFF</u>     | 3 | 1 | 2 |  |
| <u>MFSD1</u>   | 3 | 1 | 2 |  |
| <u>MFSD11</u>  | 3 | 1 | 2 |  |
| <u>MFSD6</u>   | 3 | 2 | 1 |  |
| <u>MGEA5</u>   | 3 | 2 | 1 |  |
| <u>MGLL</u>    | 3 | 1 | 2 |  |
| <u>MICALL2</u> | 3 | 1 | 2 |  |
| <u>MICB</u>    | 3 | 2 | 1 |  |
| <u>MICU1</u>   | 3 | 1 | 2 |  |
| <u>MID1IP1</u> | 3 | 2 | 1 |  |
| <u>MINK1</u>   | 3 | 2 | 1 |  |
| <u>MINPP1</u>  | 3 | 1 | 2 |  |
| <u>MIR22HG</u> | 3 | 1 | 2 |  |
| <u>MITE</u>    | 3 | 2 | 1 |  |
| <u>MKKS</u>    | 3 | 1 | 2 |  |
| <u>MLANA</u>   | 3 | 2 | 1 |  |
| <u>MLC1</u>    | 3 | 2 | 1 |  |
| <u>MLH1</u>    | 3 | 1 | 2 |  |
| <u>MLL</u>     | 3 | 2 | 1 |  |
| <u>MLLT11</u>  | 3 | 2 | 1 |  |
| <u>MLXIPL</u>  | 3 | 2 | 1 |  |
| <u>MLYCD</u>   | 3 | 1 | 2 |  |

|                |   |   |   |  |
|----------------|---|---|---|--|
| <u>MMP19</u>   | 3 | 2 | 1 |  |
| <u>MMP2</u>    | 3 | 2 | 1 |  |
| <u>MMP3</u>    | 3 | 1 | 2 |  |
| <u>MMP9</u>    | 3 | 1 | 2 |  |
| <u>MNS1</u>    | 3 | 2 | 1 |  |
| <u>MON2</u>    | 3 | 2 | 1 |  |
| <u>MORC3</u>   | 3 | 2 | 1 |  |
| <u>MORC4</u>   | 3 | 1 | 2 |  |
| <u>MORF4L1</u> | 3 | 2 | 1 |  |
| <u>MORF4L2</u> | 3 | 2 | 1 |  |
| <u>MPDU1</u>   | 3 | 2 | 1 |  |
| <u>MPG</u>     | 3 | 2 | 1 |  |
| <u>MPP5</u>    | 3 | 2 | 1 |  |
| <u>MPRIP</u>   | 3 | 1 | 2 |  |
| <u>MPZ</u>     | 3 | 2 | 1 |  |
| <u>MPZL2</u>   | 3 | 2 | 1 |  |
| <u>MRC2</u>    | 3 | 1 | 2 |  |
| <u>MRE11A</u>  | 3 | 2 | 1 |  |
| <u>MRPL17</u>  | 3 | 1 | 2 |  |
| <u>MRPL18</u>  | 3 | 0 | 3 |  |
| <u>MRPL2</u>   | 3 | 1 | 2 |  |
| <u>MRPL24</u>  | 3 | 2 | 1 |  |
| <u>MRPL39</u>  | 3 | 0 | 3 |  |
| <u>MRPL4</u>   | 3 | 2 | 1 |  |
| <u>MRPL52</u>  | 3 | 1 | 2 |  |
| <u>MRPS18A</u> | 3 | 1 | 2 |  |
| <u>MRPS18B</u> | 3 | 1 | 2 |  |
| <u>MRPS28</u>  | 3 | 2 | 1 |  |
| <u>MRPS30</u>  | 3 | 1 | 2 |  |
| <u>MS4A1</u>   | 3 | 2 | 1 |  |
| <u>MS4A6A</u>  | 3 | 2 | 1 |  |
| <u>MSL2</u>    | 3 | 2 | 1 |  |
| <u>MSL3</u>    | 3 | 1 | 2 |  |
| <u>MSMO1</u>   | 3 | 2 | 1 |  |
| <u>MSN</u>     | 3 | 2 | 1 |  |
| <u>MST1</u>    | 3 | 1 | 2 |  |
| <u>MST1R</u>   | 3 | 1 | 2 |  |
| <u>MSX2</u>    | 3 | 3 | 0 |  |
| <u>MT1E</u>    | 3 | 1 | 2 |  |
| MTCP1NB        | 3 | 1 | 2 |  |
| <u>MTF2</u>    | 3 | 3 | 0 |  |
| <u>MTFR1</u>   | 3 | 1 | 2 |  |
| <u>MTHFSD</u>  | 3 | 1 | 2 |  |
| <u>MTMR11</u>  | 3 | 1 | 2 |  |
| <u>MTO1</u>    | 3 | 1 | 2 |  |
| <u>MTRR</u>    | 3 | 2 | 1 |  |
| <u>MTUS1</u>   | 3 | 2 | 1 |  |
| <u>MTX2</u>    | 3 | 2 | 1 |  |

|                   |   |   |   |  |
|-------------------|---|---|---|--|
| <u>MUC5B</u>      | 3 | 2 | 1 |  |
| <u>MUM1</u>       | 3 | 1 | 2 |  |
| <u>MUS81</u>      | 3 | 0 | 3 |  |
| <u>MUT</u>        | 3 | 1 | 2 |  |
| <u>MVD</u>        | 3 | 2 | 1 |  |
| <u>MVP</u>        | 3 | 2 | 1 |  |
| <u>MX2</u>        | 3 | 1 | 2 |  |
| <u>MYB</u>        | 3 | 2 | 1 |  |
| <u>MYBBP1A</u>    | 3 | 1 | 2 |  |
| <u>MYL6</u>       | 3 | 2 | 1 |  |
| <u>MYLPF</u>      | 3 | 2 | 1 |  |
| <u>MYO1A</u>      | 3 | 2 | 1 |  |
| <u>MYO1C</u>      | 3 | 1 | 2 |  |
| <u>MYO5C</u>      | 3 | 1 | 2 |  |
| <u>MYO9A</u>      | 3 | 1 | 2 |  |
| <u>MYRIP</u>      | 3 | 2 | 1 |  |
| <u>MZT2A</u>      | 3 | 2 | 1 |  |
| <u>N6AMT1</u>     | 3 | 1 | 2 |  |
| <u>NAA10</u>      | 3 | 1 | 2 |  |
| <u>NAA16</u>      | 3 | 2 | 1 |  |
| <u>NAAA</u>       | 3 | 1 | 2 |  |
| <u>NACC2</u>      | 3 | 1 | 2 |  |
| <u>NADSYN1</u>    | 3 | 2 | 1 |  |
| <u>NAE1</u>       | 3 | 1 | 2 |  |
| <u>NANOG</u>      | 3 | 2 | 1 |  |
| <u>NAP1L3</u>     | 3 | 1 | 2 |  |
| <u>NAP1L4</u>     | 3 | 2 | 1 |  |
| <u>NAPG</u>       | 3 | 1 | 2 |  |
| <u>NARF</u>       | 3 | 1 | 2 |  |
| <u>NARS2</u>      | 3 | 2 | 1 |  |
| <u>NAT10</u>      | 3 | 2 | 1 |  |
| <u>NAT2</u>       | 3 | 1 | 2 |  |
| <u>NBN</u>        | 3 | 1 | 2 |  |
| <u>NCAM2</u>      | 3 | 2 | 1 |  |
| <u>NCDN</u>       | 3 | 2 | 1 |  |
| <u>NCK2</u>       | 3 | 1 | 2 |  |
| <u>NCLN</u>       | 3 | 3 | 0 |  |
| <u>NCOA3</u>      | 3 | 2 | 1 |  |
| <u>NCRNA00185</u> | 3 | 2 | 1 |  |
| <u>NDFIP1</u>     | 3 | 1 | 2 |  |
| <u>NDP</u>        | 3 | 2 | 1 |  |
| <u>NDRG1</u>      | 3 | 2 | 1 |  |
| <u>NDST3</u>      | 3 | 2 | 1 |  |
| <u>NDUFA4</u>     | 3 | 2 | 1 |  |
| <u>NDUFA8</u>     | 3 | 1 | 2 |  |
| <u>NDUFAF4</u>    | 3 | 0 | 3 |  |
| <u>NDUFB2</u>     | 3 | 2 | 1 |  |
| <u>NDUFS2</u>     | 3 | 2 | 1 |  |

|                 |   |   |   |  |
|-----------------|---|---|---|--|
| <u>NDUFV2</u>   | 3 | 1 | 2 |  |
| <u>NEDD4</u>    | 3 | 0 | 3 |  |
| <u>NEK1</u>     | 3 | 1 | 2 |  |
| <u>NEK4</u>     | 3 | 0 | 3 |  |
| <u>NEK9</u>     | 3 | 2 | 1 |  |
| <u>NELL2</u>    | 3 | 2 | 1 |  |
| <u>NEO1</u>     | 3 | 2 | 1 |  |
| <u>NETO2</u>    | 3 | 2 | 1 |  |
| <u>NF2</u>      | 3 | 2 | 1 |  |
| <u>NFATC2IP</u> | 3 | 1 | 2 |  |
| <u>NFATC4</u>   | 3 | 2 | 1 |  |
| <u>NFIB</u>     | 3 | 1 | 2 |  |
| <u>NFKBIB</u>   | 3 | 1 | 2 |  |
| <u>NFKBIE</u>   | 3 | 2 | 1 |  |
| <u>NFS1</u>     | 3 | 1 | 2 |  |
| <u>NFYB</u>     | 3 | 2 | 1 |  |
| <u>NFYC</u>     | 3 | 2 | 1 |  |
| <u>NGF</u>      | 3 | 1 | 2 |  |
| <u>NGFRAP1</u>  | 3 | 2 | 1 |  |
| <u>NGLY1</u>    | 3 | 2 | 1 |  |
| <u>NHP2</u>     | 3 | 2 | 1 |  |
| <u>NID2</u>     | 3 | 2 | 1 |  |
| <u>NIF3L1</u>   | 3 | 1 | 2 |  |
| <u>NIPA2</u>    | 3 | 0 | 3 |  |
| <u>NIPBL</u>    | 3 | 3 | 0 |  |
| <u>NIPSNAP1</u> | 3 | 2 | 1 |  |
| <u>NKTR</u>     | 3 | 2 | 1 |  |
| <u>NKX3-1</u>   | 3 | 3 | 0 |  |
| <u>NLE1</u>     | 3 | 1 | 2 |  |
| <u>NLGN4X</u>   | 3 | 2 | 1 |  |
| <u>NMT2</u>     | 3 | 2 | 1 |  |
| <u>NOC2L</u>    | 3 | 2 | 1 |  |
| <u>NOC3L</u>    | 3 | 2 | 1 |  |
| <u>NOL6</u>     | 3 | 1 | 2 |  |
| <u>NOL8</u>     | 3 | 0 | 3 |  |
| <u>NOP56</u>    | 3 | 1 | 2 |  |
| <u>NOS2</u>     | 3 | 1 | 2 |  |
| <u>NOTCH2</u>   | 3 | 2 | 1 |  |
| <u>NOTCH2NL</u> | 3 | 3 | 0 |  |
| <u>NPAT</u>     | 3 | 2 | 1 |  |
| <u>NPC1L1</u>   | 3 | 1 | 2 |  |
| <u>NPEPPS</u>   | 3 | 2 | 1 |  |
| <u>NPIPL3</u>   | 3 | 2 | 1 |  |
| <u>NPL</u>      | 3 | 2 | 1 |  |
| <u>NQO2</u>     | 3 | 2 | 1 |  |
| <u>NR1H3</u>    | 3 | 1 | 2 |  |
| <u>NR1I3</u>    | 3 | 2 | 1 |  |
| <u>NR2E1</u>    | 3 | 2 | 1 |  |

|                |   |   |   |  |
|----------------|---|---|---|--|
| <u>NRGN</u>    | 3 | 1 | 2 |  |
| <u>NRIP1</u>   | 3 | 2 | 1 |  |
| <u>NRSN2</u>   | 3 | 2 | 1 |  |
| <u>NSDHL</u>   | 3 | 2 | 1 |  |
| <u>NSF</u>     | 3 | 1 | 2 |  |
| <u>NSMCE4A</u> | 3 | 1 | 2 |  |
| <u>NSUN5P1</u> | 3 | 1 | 2 |  |
| <u>NSUN6</u>   | 3 | 2 | 1 |  |
| <u>NT5E</u>    | 3 | 2 | 1 |  |
| <u>NUCB2</u>   | 3 | 3 | 0 |  |
| <u>NUDCD3</u>  | 3 | 1 | 2 |  |
| <u>NUDT13</u>  | 3 | 1 | 2 |  |
| <u>NUDT2</u>   | 3 | 1 | 2 |  |
| <u>NUDT3</u>   | 3 | 1 | 2 |  |
| <u>NUP107</u>  | 3 | 0 | 3 |  |
| <u>NUP98</u>   | 3 | 0 | 3 |  |
| <u>NUTF2</u>   | 3 | 2 | 1 |  |
| <u>NXF1</u>    | 3 | 1 | 2 |  |
| <u>NXN</u>     | 3 | 2 | 1 |  |
| <u>NXT2</u>    | 3 | 2 | 1 |  |
| <u>OAT</u>     | 3 | 1 | 2 |  |
| <u>ODAM</u>    | 3 | 1 | 2 |  |
| <u>ODC1</u>    | 3 | 2 | 1 |  |
| <u>OFD1</u>    | 3 | 2 | 1 |  |
| <u>OGFOD1</u>  | 3 | 1 | 2 |  |
| <u>OGFOD2</u>  | 3 | 1 | 2 |  |
| <u>OLFML2A</u> | 3 | 1 | 2 |  |
| <u>OLFML3</u>  | 3 | 2 | 1 |  |
| <u>OPA3</u>    | 3 | 1 | 2 |  |
| <u>OR7E14P</u> | 3 | 2 | 1 |  |
| <u>ORC2</u>    | 3 | 3 | 0 |  |
| <u>ORC5</u>    | 3 | 2 | 1 |  |
| <u>OS9</u>     | 3 | 2 | 1 |  |
| <u>OSBP</u>    | 3 | 2 | 1 |  |
| <u>OSBPL2</u>  | 3 | 1 | 2 |  |
| <u>OSBPL9</u>  | 3 | 1 | 2 |  |
| <u>OSGEP</u>   | 3 | 1 | 2 |  |
| <u>OSGEPL1</u> | 3 | 2 | 1 |  |
| <u>OSGIN1</u>  | 3 | 2 | 1 |  |
| <u>OSMR</u>    | 3 | 1 | 2 |  |
| <u>OSR2</u>    | 3 | 2 | 1 |  |
| <u>OSTF1</u>   | 3 | 2 | 1 |  |
| <u>OVGPI</u>   | 3 | 2 | 1 |  |
| <u>OXA1L</u>   | 3 | 1 | 2 |  |
| <u>OXT</u>     | 3 | 2 | 1 |  |
| <u>P2RX4</u>   | 3 | 1 | 2 |  |
| <u>P2RX5</u>   | 3 | 1 | 2 |  |
| <u>P2RY2</u>   | 3 | 1 | 2 |  |

|                |   |   |   |  |
|----------------|---|---|---|--|
| <u>P2RY4</u>   | 3 | 2 | 1 |  |
| <u>P2RY6</u>   | 3 | 2 | 1 |  |
| <u>P4HA1</u>   | 3 | 1 | 2 |  |
| <u>P4HB</u>    | 3 | 2 | 1 |  |
| <u>PA2G4</u>   | 3 | 1 | 2 |  |
| <u>PABPC1</u>  | 3 | 2 | 1 |  |
| <u>PABPN1</u>  | 3 | 2 | 1 |  |
| <u>PAEP</u>    | 3 | 2 | 1 |  |
| <u>PAF1</u>    | 3 | 2 | 1 |  |
| <u>PAH</u>     | 3 | 2 | 1 |  |
| <u>PAIP1</u>   | 3 | 1 | 2 |  |
| <u>PAK1IP1</u> | 3 | 1 | 2 |  |
| <u>PAK2</u>    | 3 | 1 | 2 |  |
| <u>PALB2</u>   | 3 | 1 | 2 |  |
| <u>PAM16</u>   | 3 | 1 | 2 |  |
| <u>PAN2</u>    | 3 | 1 | 2 |  |
| <u>PANK2</u>   | 3 | 1 | 2 |  |
| <u>PANX1</u>   | 3 | 0 | 3 |  |
| <u>PAQR4</u>   | 3 | 2 | 1 |  |
| <u>PAQR6</u>   | 3 | 2 | 1 |  |
| <u>PARD6B</u>  | 3 | 3 | 0 |  |
| <u>PARP12</u>  | 3 | 1 | 2 |  |
| <u>PAX6</u>    | 3 | 2 | 1 |  |
| <u>PBK</u>     | 3 | 2 | 1 |  |
| <u>PBX2</u>    | 3 | 2 | 1 |  |
| <u>PBXIP1</u>  | 3 | 3 | 0 |  |
| <u>PC</u>      | 3 | 3 | 0 |  |
| <u>PCBP3</u>   | 3 | 2 | 1 |  |
| <u>PCDH8</u>   | 3 | 1 | 2 |  |
| <u>PCDH9</u>   | 3 | 2 | 1 |  |
| <u>PCM1</u>    | 3 | 1 | 2 |  |
| <u>PCMT1</u>   | 3 | 2 | 1 |  |
| <u>PCNP</u>    | 3 | 1 | 2 |  |
| <u>PCNX</u>    | 3 | 3 | 0 |  |
| <u>PCYT2</u>   | 3 | 2 | 1 |  |
| <u>PDCD10</u>  | 3 | 1 | 2 |  |
| <u>PDCD2</u>   | 3 | 2 | 1 |  |
| <u>PDCD4</u>   | 3 | 1 | 2 |  |
| <u>PDCL</u>    | 3 | 2 | 1 |  |
| <u>PDE1A</u>   | 3 | 2 | 1 |  |
| <u>PDE4D</u>   | 3 | 2 | 1 |  |
| <u>PDE6D</u>   | 3 | 1 | 2 |  |
| <u>PDE8A</u>   | 3 | 1 | 2 |  |
| <u>PDE8B</u>   | 3 | 2 | 1 |  |
| <u>PDGFA</u>   | 3 | 1 | 2 |  |
| <u>PDGFB</u>   | 3 | 2 | 1 |  |
| <u>PDGFD</u>   | 3 | 1 | 2 |  |
| <u>PDGFRL</u>  | 3 | 1 | 2 |  |

|                |   |   |   |  |
|----------------|---|---|---|--|
| <u>PDK3</u>    | 3 | 2 | 1 |  |
| <u>PDXDC1</u>  | 3 | 1 | 2 |  |
| <u>PDXK</u>    | 3 | 1 | 2 |  |
| <u>PDZD2</u>   | 3 | 3 | 0 |  |
| <u>PDZK1</u>   | 3 | 1 | 2 |  |
| <u>PDZRN3</u>  | 3 | 1 | 2 |  |
| <u>PEA15</u>   | 3 | 3 | 0 |  |
| <u>PELO</u>    | 3 | 2 | 1 |  |
| <u>PER3</u>    | 3 | 1 | 2 |  |
| <u>PEX10</u>   | 3 | 2 | 1 |  |
| <u>PEX16</u>   | 3 | 2 | 1 |  |
| <u>PEX5</u>    | 3 | 2 | 1 |  |
| <u>PFAS</u>    | 3 | 1 | 2 |  |
| <u>PFDN1</u>   | 3 | 1 | 2 |  |
| <u>PFDN2</u>   | 3 | 2 | 1 |  |
| <u>PFKP</u>    | 3 | 2 | 1 |  |
| <u>PGAM1</u>   | 3 | 2 | 1 |  |
| <u>PGAM2</u>   | 3 | 2 | 1 |  |
| <u>PGM3</u>    | 3 | 1 | 2 |  |
| <u>PGRMC2</u>  | 3 | 1 | 2 |  |
| <u>PGS1</u>    | 3 | 2 | 1 |  |
| <u>PHGDH</u>   | 3 | 0 | 3 |  |
| <u>PHKB</u>    | 3 | 2 | 1 |  |
| <u>PHKG2</u>   | 3 | 1 | 2 |  |
| <u>PI3</u>     | 3 | 2 | 1 |  |
| <u>PIAS1</u>   | 3 | 2 | 1 |  |
| <u>PIAS3</u>   | 3 | 2 | 1 |  |
| <u>PIBF1</u>   | 3 | 2 | 1 |  |
| <u>PICALM</u>  | 3 | 2 | 1 |  |
| <u>PIDD</u>    | 3 | 2 | 1 |  |
| <u>PIEZO1</u>  | 3 | 1 | 2 |  |
| <u>PIEZO2</u>  | 3 | 1 | 2 |  |
| <u>PIGC</u>    | 3 | 2 | 1 |  |
| <u>PIGF</u>    | 3 | 1 | 2 |  |
| <u>PIGP</u>    | 3 | 2 | 1 |  |
| <u>PIK3C3</u>  | 3 | 2 | 1 |  |
| <u>PIK3IP1</u> | 3 | 2 | 1 |  |
| <u>PILRB</u>   | 3 | 1 | 2 |  |
| <u>PIN1</u>    | 3 | 1 | 2 |  |
| <u>PINK1</u>   | 3 | 1 | 2 |  |
| <u>PIP4K2A</u> | 3 | 1 | 2 |  |
| <u>PIP4K2B</u> | 3 | 2 | 1 |  |
| <u>PIP5K1A</u> | 3 | 3 | 0 |  |
| <u>PISD</u>    | 3 | 2 | 1 |  |
| <u>PITPNA</u>  | 3 | 1 | 2 |  |
| <u>PITPNB</u>  | 3 | 2 | 1 |  |
| <u>PKN2</u>    | 3 | 3 | 0 |  |
| <u>PKP3</u>    | 3 | 2 | 1 |  |

|                  |   |   |   |  |
|------------------|---|---|---|--|
| <u>PLA2G2D</u>   | 3 | 1 | 2 |  |
| <u>PLAGL1</u>    | 3 | 2 | 1 |  |
| <u>PLAGL2</u>    | 3 | 3 | 0 |  |
| <u>PLCB3</u>     | 3 | 1 | 2 |  |
| <u>PLCB4</u>     | 3 | 2 | 1 |  |
| <u>PLCD1</u>     | 3 | 1 | 2 |  |
| <u>PLCXD1</u>    | 3 | 2 | 1 |  |
| <u>PLEK2</u>     | 3 | 2 | 1 |  |
| <u>PLEKHA8P1</u> | 3 | 2 | 1 |  |
| <u>PLEKHG3</u>   | 3 | 2 | 1 |  |
| <u>PLEKHM2</u>   | 3 | 1 | 2 |  |
| <u>PLLP</u>      | 3 | 3 | 0 |  |
| <u>PLOD2</u>     | 3 | 2 | 1 |  |
| <u>PLP2</u>      | 3 | 2 | 1 |  |
| <u>PLXNA1</u>    | 3 | 1 | 2 |  |
| <u>PLXNA2</u>    | 3 | 2 | 1 |  |
| <u>PLXNC1</u>    | 3 | 2 | 1 |  |
| <u>PMEL</u>      | 3 | 2 | 1 |  |
| <u>PMP22</u>     | 3 | 2 | 1 |  |
| <u>PMS2P3</u>    | 3 | 1 | 2 |  |
| <u>PNKP</u>      | 3 | 1 | 2 |  |
| <u>PNMA2</u>     | 3 | 2 | 1 |  |
| <u>PNP</u>       | 3 | 1 | 2 |  |
| <u>PODXL</u>     | 3 | 2 | 1 |  |
| <u>POF1B</u>     | 3 | 1 | 2 |  |
| <u>POGK</u>      | 3 | 1 | 2 |  |
| <u>POGLUT1</u>   | 3 | 0 | 3 |  |
| <u>POGZ</u>      | 3 | 2 | 1 |  |
| <u>POLA1</u>     | 3 | 2 | 1 |  |
| <u>POLA2</u>     | 3 | 1 | 2 |  |
| <u>POLB</u>      | 3 | 1 | 2 |  |
| <u>POLD2</u>     | 3 | 1 | 2 |  |
| <u>POLD3</u>     | 3 | 1 | 2 |  |
| <u>POLR2A</u>    | 3 | 3 | 0 |  |
| <u>POLR2B</u>    | 3 | 2 | 1 |  |
| <u>POLR2K</u>    | 3 | 1 | 2 |  |
| <u>POLR2L</u>    | 3 | 2 | 1 |  |
| <u>POLR3G</u>    | 3 | 1 | 2 |  |
| <u>PON2</u>      | 3 | 2 | 1 |  |
| <u>POP4</u>      | 3 | 1 | 2 |  |
| <u>POP5</u>      | 3 | 0 | 3 |  |
| <u>POR</u>       | 3 | 2 | 1 |  |
| <u>POU2F1</u>    | 3 | 2 | 1 |  |
| <u>POU6F1</u>    | 3 | 2 | 1 |  |
| <u>PPAP2C</u>    | 3 | 1 | 2 |  |
| <u>PPARGC1A</u>  | 3 | 2 | 1 |  |
| <u>PPCDC</u>     | 3 | 2 | 1 |  |
| <u>PPDPF</u>     | 3 | 1 | 2 |  |

|                  |   |   |   |  |
|------------------|---|---|---|--|
| <u>PPFIA1</u>    | 3 | 1 | 2 |  |
| <u>PPFIBP1</u>   | 3 | 2 | 1 |  |
| <u>PPM1B</u>     | 3 | 2 | 1 |  |
| <u>PPOX</u>      | 3 | 2 | 1 |  |
| <u>PPP1CB</u>    | 3 | 2 | 1 |  |
| <u>PPP1R7</u>    | 3 | 1 | 2 |  |
| <u>PPP2CB</u>    | 3 | 1 | 2 |  |
| <u>PPP2R5B</u>   | 3 | 1 | 2 |  |
| <u>PPP3R1</u>    | 3 | 2 | 1 |  |
| <u>PPRC1</u>     | 3 | 1 | 2 |  |
| <u>PQBP1</u>     | 3 | 2 | 1 |  |
| <u>PRDX3</u>     | 3 | 2 | 1 |  |
| <u>PRDX4</u>     | 3 | 2 | 1 |  |
| <u>PRDX6</u>     | 3 | 2 | 1 |  |
| <u>PRELP</u>     | 3 | 2 | 1 |  |
| <u>PREP</u>      | 3 | 1 | 2 |  |
| <u>PREPL</u>     | 3 | 1 | 2 |  |
| <u>PRIM1</u>     | 3 | 1 | 2 |  |
| <u>PRKAA1</u>    | 3 | 2 | 1 |  |
| <u>PRKAR1A</u>   | 3 | 2 | 1 |  |
| <u>PRKAR2A</u>   | 3 | 3 | 0 |  |
| <u>PRKAR2B</u>   | 3 | 1 | 2 |  |
| <u>PRKD3</u>     | 3 | 1 | 2 |  |
| <u>PRKRIR</u>    | 3 | 2 | 1 |  |
| <u>PRKY</u>      | 3 | 2 | 1 |  |
| <u>PRMT1</u>     | 3 | 2 | 1 |  |
| <u>PRMT5</u>     | 3 | 1 | 2 |  |
| <u>PRMT7</u>     | 3 | 1 | 2 |  |
| <u>PROSAPIP1</u> | 3 | 1 | 2 |  |
| <u>PROX1</u>     | 3 | 2 | 1 |  |
| <u>PROZ</u>      | 3 | 2 | 1 |  |
| <u>PRPSAP2</u>   | 3 | 1 | 2 |  |
| <u>PRR15L</u>    | 3 | 2 | 1 |  |
| <u>PRR16</u>     | 3 | 1 | 2 |  |
| <u>PRR7</u>      | 3 | 2 | 1 |  |
| <u>PRRC1</u>     | 3 | 0 | 3 |  |
| <u>PRRC2C</u>    | 3 | 1 | 2 |  |
| <u>PRSS22</u>    | 3 | 3 | 0 |  |
| <u>PSEN1</u>     | 3 | 1 | 2 |  |
| <u>PSG7</u>      | 3 | 2 | 1 |  |
| <u>PSG9</u>      | 3 | 3 | 0 |  |
| <u>PSIP1</u>     | 3 | 2 | 1 |  |
| <u>PSMA6</u>     | 3 | 2 | 1 |  |
| <u>PSMB1</u>     | 3 | 2 | 1 |  |
| <u>PSMC1</u>     | 3 | 1 | 2 |  |
| <u>PSMC2</u>     | 3 | 1 | 2 |  |
| <u>PSMC3IP</u>   | 3 | 1 | 2 |  |
| <u>PSMD2</u>     | 3 | 1 | 2 |  |

|                 |   |   |   |  |
|-----------------|---|---|---|--|
| <u>PSMD8</u>    | 3 | 2 | 1 |  |
| <u>PSMD9</u>    | 3 | 1 | 2 |  |
| <u>PTCH1</u>    | 3 | 2 | 1 |  |
| <u>PTDSS2</u>   | 3 | 2 | 1 |  |
| <u>PTER</u>     | 3 | 1 | 2 |  |
| <u>PTGER3</u>   | 3 | 3 | 0 |  |
| <u>PTH1R</u>    | 3 | 1 | 2 |  |
| <u>PTMS</u>     | 3 | 2 | 1 |  |
| <u>PTPN21</u>   | 3 | 3 | 0 |  |
| <u>PTPN3</u>    | 3 | 1 | 2 |  |
| <u>PTPRC</u>    | 3 | 2 | 1 |  |
| <u>PTRH2</u>    | 3 | 1 | 2 |  |
| <u>PTTG1IP</u>  | 3 | 1 | 2 |  |
| <u>PURA</u>     | 3 | 2 | 1 |  |
| <u>PUS3</u>     | 3 | 1 | 2 |  |
| <u>PXMP2</u>    | 3 | 1 | 2 |  |
| <u>QKI</u>      | 3 | 2 | 1 |  |
| <u>R3HCC1</u>   | 3 | 1 | 2 |  |
| <u>RAB27B</u>   | 3 | 1 | 2 |  |
| <u>RAB28</u>    | 3 | 2 | 1 |  |
| <u>RAB32</u>    | 3 | 2 | 1 |  |
| <u>RAB3GAP1</u> | 3 | 2 | 1 |  |
| <u>RAB4A</u>    | 3 | 2 | 1 |  |
| <u>RAB7A</u>    | 3 | 3 | 0 |  |
| <u>RAB9A</u>    | 3 | 1 | 2 |  |
| <u>RABAC1</u>   | 3 | 2 | 1 |  |
| <u>RABGAP1</u>  | 3 | 1 | 2 |  |
| <u>RABIF</u>    | 3 | 1 | 2 |  |
| <u>RAD1</u>     | 3 | 2 | 1 |  |
| <u>RAD17</u>    | 3 | 1 | 2 |  |
| <u>RAD23B</u>   | 3 | 1 | 2 |  |
| <u>RAD54B</u>   | 3 | 2 | 1 |  |
| <u>RAF1</u>     | 3 | 1 | 2 |  |
| <u>RALA</u>     | 3 | 1 | 2 |  |
| <u>RALGAP1</u>  | 3 | 3 | 0 |  |
| <u>RAMP1</u>    | 3 | 1 | 2 |  |
| <u>RAN</u>      | 3 | 1 | 2 |  |
| <u>RANBP2</u>   | 3 | 2 | 1 |  |
| <u>RAPGEFL1</u> | 3 | 2 | 1 |  |
| <u>RARA</u>     | 3 | 3 | 0 |  |
| <u>RARG</u>     | 3 | 3 | 0 |  |
| <u>RASA1</u>    | 3 | 1 | 2 |  |
| <u>RASAL2</u>   | 3 | 3 | 0 |  |
| <u>RB1CC1</u>   | 3 | 1 | 2 |  |
| <u>RBBP5</u>    | 3 | 2 | 1 |  |
| <u>RBFOX2</u>   | 3 | 3 | 0 |  |
| <u>RBM15B</u>   | 3 | 1 | 2 |  |
| <u>RBM23</u>    | 3 | 2 | 1 |  |

|                |   |   |   |  |
|----------------|---|---|---|--|
| <u>RBM25</u>   | 3 | 1 | 2 |  |
| <u>RBM34</u>   | 3 | 2 | 1 |  |
| <u>RBM38</u>   | 3 | 2 | 1 |  |
| <u>RBM41</u>   | 3 | 2 | 1 |  |
| <u>RBM4B</u>   | 3 | 1 | 2 |  |
| <u>RBM7</u>    | 3 | 1 | 2 |  |
| <u>RBX1</u>    | 3 | 2 | 1 |  |
| <u>RC3H2</u>   | 3 | 2 | 1 |  |
| <u>RCE1</u>    | 3 | 1 | 2 |  |
| <u>RCL1</u>    | 3 | 1 | 2 |  |
| <u>RDH11</u>   | 3 | 2 | 1 |  |
| <u>RDX</u>     | 3 | 0 | 3 |  |
| <u>RECQL</u>   | 3 | 2 | 1 |  |
| <u>RECQL5</u>  | 3 | 2 | 1 |  |
| <u>REL</u>     | 3 | 2 | 1 |  |
| <u>RELA</u>    | 3 | 1 | 2 |  |
| <u>RENBP</u>   | 3 | 2 | 1 |  |
| <u>RET</u>     | 3 | 1 | 2 |  |
| <u>RGS17</u>   | 3 | 3 | 0 |  |
| <u>RGS19</u>   | 3 | 2 | 1 |  |
| <u>RGS3</u>    | 3 | 2 | 1 |  |
| <u>RGS4</u>    | 3 | 2 | 1 |  |
| <u>RGS7</u>    | 3 | 2 | 1 |  |
| <u>RHBG</u>    | 3 | 1 | 2 |  |
| <u>RHOB</u>    | 3 | 1 | 2 |  |
| <u>RHOQ</u>    | 3 | 1 | 2 |  |
| <u>RHOT1</u>   | 3 | 1 | 2 |  |
| <u>RIN2</u>    | 3 | 2 | 1 |  |
| <u>RIPK2</u>   | 3 | 0 | 3 |  |
| <u>RIPK4</u>   | 3 | 2 | 1 |  |
| <u>RLN2</u>    | 3 | 2 | 1 |  |
| <u>RMND5A</u>  | 3 | 2 | 1 |  |
| <u>RMND5B</u>  | 3 | 1 | 2 |  |
| <u>RNASEH1</u> | 3 | 0 | 3 |  |
| <u>RNASEL</u>  | 3 | 2 | 1 |  |
| <u>RNASET2</u> | 3 | 2 | 1 |  |
| <u>RNF144A</u> | 3 | 1 | 2 |  |
| <u>RNF146</u>  | 3 | 2 | 1 |  |
| <u>RNF19B</u>  | 3 | 1 | 2 |  |
| <u>RNF25</u>   | 3 | 1 | 2 |  |
| <u>RNF31</u>   | 3 | 2 | 1 |  |
| <u>RNF38</u>   | 3 | 1 | 2 |  |
| <u>RNF4</u>    | 3 | 0 | 3 |  |
| <u>RNF41</u>   | 3 | 1 | 2 |  |
| <u>RNGTT</u>   | 3 | 2 | 1 |  |
| <u>RNMT</u>    | 3 | 1 | 2 |  |
| <u>ROBO4</u>   | 3 | 1 | 2 |  |
| <u>RP2</u>     | 3 | 1 | 2 |  |

|                |   |   |   |  |
|----------------|---|---|---|--|
| RPH3A          | 3 | 1 | 2 |  |
| <u>RPH3AL</u>  | 3 | 1 | 2 |  |
| <u>RPL10A</u>  | 3 | 2 | 1 |  |
| <u>RPL11</u>   | 3 | 1 | 2 |  |
| <u>RPL22</u>   | 3 | 1 | 2 |  |
| <u>RPL24</u>   | 3 | 1 | 2 |  |
| <u>RPL28</u>   | 3 | 1 | 2 |  |
| <u>RPL34</u>   | 3 | 1 | 2 |  |
| <u>RPL35A</u>  | 3 | 2 | 1 |  |
| <u>RPL38</u>   | 3 | 1 | 2 |  |
| <u>RPL4</u>    | 3 | 1 | 2 |  |
| <u>RPL5</u>    | 3 | 1 | 2 |  |
| <u>RPL8</u>    | 3 | 2 | 1 |  |
| <u>RPLP2</u>   | 3 | 1 | 2 |  |
| <u>RPP25</u>   | 3 | 2 | 1 |  |
| RPS14P3        | 3 | 2 | 1 |  |
| <u>RPS19</u>   | 3 | 0 | 3 |  |
| <u>RPS25</u>   | 3 | 2 | 1 |  |
| <u>RPS28</u>   | 3 | 2 | 1 |  |
| <u>RPS3A</u>   | 3 | 2 | 1 |  |
| <u>RPS5</u>    | 3 | 1 | 2 |  |
| <u>RPS6KA2</u> | 3 | 2 | 1 |  |
| <u>RPS6KA4</u> | 3 | 1 | 2 |  |
| <u>RPS6KB1</u> | 3 | 3 | 0 |  |
| <u>RPS8</u>    | 3 | 1 | 2 |  |
| <u>RPS9</u>    | 3 | 1 | 2 |  |
| <u>RPUSD2</u>  | 3 | 1 | 2 |  |
| <u>RRAS2</u>   | 3 | 2 | 1 |  |
| <u>RREB1</u>   | 3 | 2 | 1 |  |
| <u>RRM1</u>    | 3 | 2 | 1 |  |
| <u>RRN3</u>    | 3 | 2 | 1 |  |
| <u>RRN3P1</u>  | 3 | 3 | 0 |  |
| <u>RRP12</u>   | 3 | 1 | 2 |  |
| <u>RRP1B</u>   | 3 | 1 | 2 |  |
| <u>RRP9</u>    | 3 | 1 | 2 |  |
| <u>RSAD2</u>   | 3 | 2 | 1 |  |
| <u>RSBN1</u>   | 3 | 1 | 2 |  |
| <u>RSF1</u>    | 3 | 3 | 0 |  |
| <u>RSRC1</u>   | 3 | 1 | 2 |  |
| <u>RSRC2</u>   | 3 | 1 | 2 |  |
| <u>RTN4</u>    | 3 | 2 | 1 |  |
| <u>RUFY3</u>   | 3 | 1 | 2 |  |
| <u>RUNDC3B</u> | 3 | 1 | 2 |  |
| <u>RWDD1</u>   | 3 | 1 | 2 |  |
| <u>RXRG</u>    | 3 | 3 | 0 |  |
| <u>RYBP</u>    | 3 | 2 | 1 |  |
| <u>S100A10</u> | 3 | 1 | 2 |  |
| <u>S100A4</u>  | 3 | 2 | 1 |  |

|                |   |   |   |  |
|----------------|---|---|---|--|
| <u>S100P</u>   | 3 | 1 | 2 |  |
| <u>S100PBP</u> | 3 | 2 | 1 |  |
| <u>SAC3D1</u>  | 3 | 1 | 2 |  |
| <u>SACM1L</u>  | 3 | 2 | 1 |  |
| <u>SACS</u>    | 3 | 1 | 2 |  |
| <u>SAGE1</u>   | 3 | 2 | 1 |  |
| <u>SAP130</u>  | 3 | 1 | 2 |  |
| <u>SAP18</u>   | 3 | 0 | 3 |  |
| <u>SAP30L</u>  | 3 | 0 | 3 |  |
| <u>SART3</u>   | 3 | 1 | 2 |  |
| <u>SATB2</u>   | 3 | 1 | 2 |  |
| <u>SAV1</u>    | 3 | 0 | 3 |  |
| <u>SBF1</u>    | 3 | 2 | 1 |  |
| <u>SBNO1</u>   | 3 | 2 | 1 |  |
| <u>SBNO2</u>   | 3 | 1 | 2 |  |
| <u>SCAF4</u>   | 3 | 1 | 2 |  |
| <u>SCAF8</u>   | 3 | 2 | 1 |  |
| <u>SCAI</u>    | 3 | 2 | 1 |  |
| <u>SCAMP1</u>  | 3 | 1 | 2 |  |
| <u>SCAMP3</u>  | 3 | 2 | 1 |  |
| <u>SCAP</u>    | 3 | 2 | 1 |  |
| <u>SCFD1</u>   | 3 | 2 | 1 |  |
| <u>SCG5</u>    | 3 | 1 | 2 |  |
| <u>SCGB1D2</u> | 3 | 3 | 0 |  |
| <u>SCGB2A1</u> | 3 | 3 | 0 |  |
| <u>SCGB2A2</u> | 3 | 1 | 2 |  |
| <u>SCMH1</u>   | 3 | 1 | 2 |  |
| <u>SCN1B</u>   | 3 | 1 | 2 |  |
| <u>SCNN1B</u>  | 3 | 2 | 1 |  |
| <u>SCO2</u>    | 3 | 1 | 2 |  |
| <u>SCYL3</u>   | 3 | 2 | 1 |  |
| <u>SDAD1</u>   | 3 | 0 | 3 |  |
| <u>SDC3</u>    | 3 | 2 | 1 |  |
| <u>SDHAP1</u>  | 3 | 2 | 1 |  |
| <u>SDHB</u>    | 3 | 2 | 1 |  |
| <u>SDHC</u>    | 3 | 2 | 1 |  |
| <u>SDS</u>     | 3 | 1 | 2 |  |
| <u>SEC13</u>   | 3 | 1 | 2 |  |
| <u>SEC16A</u>  | 3 | 2 | 1 |  |
| <u>SEC23A</u>  | 3 | 2 | 1 |  |
| <u>SEC23B</u>  | 3 | 1 | 2 |  |
| <u>SEC24A</u>  | 3 | 1 | 2 |  |
| <u>SEC24D</u>  | 3 | 2 | 1 |  |
| <u>SEC31A</u>  | 3 | 2 | 1 |  |
| <u>SEC63</u>   | 3 | 1 | 2 |  |
| <u>SECTM1</u>  | 3 | 2 | 1 |  |
| <u>SEH1L</u>   | 3 | 0 | 3 |  |
| <u>SELP</u>    | 3 | 2 | 1 |  |

|                  |   |   |   |  |
|------------------|---|---|---|--|
| <u>SEMA4C</u>    | 3 | 2 | 1 |  |
| <u>SEMA5A</u>    | 3 | 1 | 2 |  |
| <u>SEPHS2</u>    | 3 | 1 | 2 |  |
| <u>SEPT2</u>     | 3 | 2 | 1 |  |
| <u>SEPT6</u>     | 3 | 1 | 2 |  |
| <u>SEPT8</u>     | 3 | 2 | 1 |  |
| <u>SEPX1</u>     | 3 | 2 | 1 |  |
| <u>SERINC5</u>   | 3 | 1 | 2 |  |
| <u>SERPINA10</u> | 3 | 2 | 1 |  |
| <u>SERPINA7</u>  | 3 | 2 | 1 |  |
| <u>SERPINB2</u>  | 3 | 2 | 1 |  |
| <u>SERPINB3</u>  | 3 | 2 | 1 |  |
| <u>SERPINI1</u>  | 3 | 1 | 2 |  |
| <u>SERTAD2</u>   | 3 | 2 | 1 |  |
| <u>SESN1</u>     | 3 | 0 | 3 |  |
| <u>SETD1A</u>    | 3 | 1 | 2 |  |
| <u>SETD3</u>     | 3 | 2 | 1 |  |
| <u>SETD4</u>     | 3 | 1 | 2 |  |
| <u>SETMAR</u>    | 3 | 2 | 1 |  |
| <u>SF1</u>       | 3 | 2 | 1 |  |
| <u>SF3A2</u>     | 3 | 2 | 1 |  |
| <u>SF3B1</u>     | 3 | 1 | 2 |  |
| <u>SF3B2</u>     | 3 | 1 | 2 |  |
| <u>SFMBT1</u>    | 3 | 2 | 1 |  |
| <u>SFPQ</u>      | 3 | 2 | 1 |  |
| <u>SFRP5</u>     | 3 | 2 | 1 |  |
| <u>SFSWAP</u>    | 3 | 1 | 2 |  |
| <u>SFTPA2</u>    | 3 | 2 | 1 |  |
| <u>SFTPBB</u>    | 3 | 2 | 1 |  |
| <u>SGMS1</u>     | 3 | 2 | 1 |  |
| <u>SGPL1</u>     | 3 | 1 | 2 |  |
| <u>SGSH</u>      | 3 | 3 | 0 |  |
| <u>SH2D4A</u>    | 3 | 1 | 2 |  |
| <u>SH3BGRL3</u>  | 3 | 1 | 2 |  |
| <u>SH3GL2</u>    | 3 | 2 | 1 |  |
| <u>SH3TC1</u>    | 3 | 2 | 1 |  |
| <u>SIAH1</u>     | 3 | 2 | 1 |  |
| <u>SIDT2</u>     | 3 | 1 | 2 |  |
| <u>SIM2</u>      | 3 | 2 | 1 |  |
| <u>SIPA1L1</u>   | 3 | 2 | 1 |  |
| <u>SIX1</u>      | 3 | 1 | 2 |  |
| <u>SKAP2</u>     | 3 | 1 | 2 |  |
| <u>SKIL</u>      | 3 | 3 | 0 |  |
| <u>SLC12A1</u>   | 3 | 2 | 1 |  |
| <u>SLC12A7</u>   | 3 | 2 | 1 |  |
| <u>SLC16A1</u>   | 3 | 1 | 2 |  |
| <u>SLC16A6</u>   | 3 | 2 | 1 |  |
| <u>SLC16A7</u>   | 3 | 2 | 1 |  |

|                 |   |   |   |  |
|-----------------|---|---|---|--|
| <u>SLC17A9</u>  | 3 | 2 | 1 |  |
| <u>SLC18A2</u>  | 3 | 1 | 2 |  |
| <u>SLC1A1</u>   | 3 | 1 | 2 |  |
| <u>SLC1A2</u>   | 3 | 1 | 2 |  |
| <u>SLC1A5</u>   | 3 | 1 | 2 |  |
| <u>SLC25A17</u> | 3 | 2 | 1 |  |
| <u>SLC25A20</u> | 3 | 2 | 1 |  |
| <u>SLC25A38</u> | 3 | 2 | 1 |  |
| <u>SLC25A4</u>  | 3 | 3 | 0 |  |
| <u>SLC25A40</u> | 3 | 2 | 1 |  |
| <u>SLC25A44</u> | 3 | 1 | 2 |  |
| <u>SLC25A46</u> | 3 | 0 | 3 |  |
| <u>SLC26A2</u>  | 3 | 1 | 2 |  |
| <u>SLC26A6</u>  | 3 | 2 | 1 |  |
| <u>SLC2A10</u>  | 3 | 1 | 2 |  |
| <u>SLC2A9</u>   | 3 | 2 | 1 |  |
| <u>SLC30A3</u>  | 3 | 2 | 1 |  |
| <u>SLC30A5</u>  | 3 | 1 | 2 |  |
| <u>SLC31A2</u>  | 3 | 2 | 1 |  |
| <u>SLC35A1</u>  | 3 | 1 | 2 |  |
| <u>SLC35A2</u>  | 3 | 2 | 1 |  |
| <u>SLC35D2</u>  | 3 | 1 | 2 |  |
| <u>SLC35E2</u>  | 3 | 1 | 2 |  |
| <u>SLC35F5</u>  | 3 | 3 | 0 |  |
| <u>SLC37A1</u>  | 3 | 2 | 1 |  |
| <u>SLC38A2</u>  | 3 | 1 | 2 |  |
| <u>SLC39A9</u>  | 3 | 3 | 0 |  |
| <u>SLC45A2</u>  | 3 | 3 | 0 |  |
| <u>SLC4A1AP</u> | 3 | 1 | 2 |  |
| <u>SLC4A4</u>   | 3 | 2 | 1 |  |
| <u>SLC4A8</u>   | 3 | 1 | 2 |  |
| <u>SLC5A3</u>   | 3 | 2 | 1 |  |
| <u>SLC5A6</u>   | 3 | 2 | 1 |  |
| <u>SLC6A4</u>   | 3 | 1 | 2 |  |
| <u>SLC7A11</u>  | 3 | 0 | 3 |  |
| <u>SLC7A6</u>   | 3 | 2 | 1 |  |
| <u>SLC9A1</u>   | 3 | 2 | 1 |  |
| <u>SLC9A6</u>   | 3 | 0 | 3 |  |
| <u>SLC9A8</u>   | 3 | 2 | 1 |  |
| <u>SLCO1B3</u>  | 3 | 2 | 1 |  |
| <u>SLIT2</u>    | 3 | 2 | 1 |  |
| <u>SLMO1</u>    | 3 | 2 | 1 |  |
| <u>SLMO2</u>    | 3 | 1 | 2 |  |
| <u>SLTM</u>     | 3 | 0 | 3 |  |
| <u>SMAD2</u>    | 3 | 2 | 1 |  |
| <u>SMAD7</u>    | 3 | 2 | 1 |  |
| <u>SMAP1</u>    | 3 | 2 | 1 |  |
| <u>SMARCA2</u>  | 3 | 1 | 2 |  |

|                |   |   |   |  |
|----------------|---|---|---|--|
| <u>SMARCA4</u> | 3 | 2 | 1 |  |
| <u>SMARCA5</u> | 3 | 2 | 1 |  |
| <u>SMARCC1</u> | 3 | 2 | 1 |  |
| <u>SMARCE1</u> | 3 | 1 | 2 |  |
| <u>SMC3</u>    | 3 | 0 | 3 |  |
| <u>SMC4</u>    | 3 | 2 | 1 |  |
| <u>SMC5</u>    | 3 | 3 | 0 |  |
| <u>SMG5</u>    | 3 | 2 | 1 |  |
| <u>SMG7</u>    | 3 | 3 | 0 |  |
| <u>SMOX</u>    | 3 | 2 | 1 |  |
| <u>SMUG1</u>   | 3 | 1 | 2 |  |
| <u>SMURF2</u>  | 3 | 1 | 2 |  |
| <u>SNAI2</u>   | 3 | 2 | 1 |  |
| <u>SNAP29</u>  | 3 | 1 | 2 |  |
| <u>SNAPC1</u>  | 3 | 1 | 2 |  |
| <u>SNAPC3</u>  | 3 | 2 | 1 |  |
| <u>SNCA</u>    | 3 | 2 | 1 |  |
| SNORA21        | 3 | 1 | 2 |  |
| <u>SNRNP70</u> | 3 | 2 | 1 |  |
| <u>SNRPB</u>   | 3 | 1 | 2 |  |
| <u>SNRPD3</u>  | 3 | 2 | 1 |  |
| <u>SNRPE</u>   | 3 | 2 | 1 |  |
| <u>SNW1</u>    | 3 | 2 | 1 |  |
| <u>SNX16</u>   | 3 | 3 | 0 |  |
| <u>SNX19</u>   | 3 | 1 | 2 |  |
| <u>SNX24</u>   | 3 | 1 | 2 |  |
| <u>SOBP</u>    | 3 | 2 | 1 |  |
| <u>SOCS1</u>   | 3 | 2 | 1 |  |
| <u>SOCS2</u>   | 3 | 2 | 1 |  |
| <u>SOCS5</u>   | 3 | 2 | 1 |  |
| <u>SON</u>     | 3 | 1 | 2 |  |
| <u>SORBS1</u>  | 3 | 3 | 0 |  |
| <u>SP140L</u>  | 3 | 2 | 1 |  |
| <u>SPAG1</u>   | 3 | 2 | 1 |  |
| <u>SPAG9</u>   | 3 | 3 | 0 |  |
| <u>SPATA2</u>  | 3 | 2 | 1 |  |
| <u>SPATA20</u> | 3 | 2 | 1 |  |
| <u>SPATA7</u>  | 3 | 2 | 1 |  |
| <u>SPG11</u>   | 3 | 2 | 1 |  |
| <u>SPG20</u>   | 3 | 2 | 1 |  |
| SPG21          | 3 | 2 | 1 |  |
| <u>SPG7</u>    | 3 | 1 | 2 |  |
| <u>SPHK1</u>   | 3 | 2 | 1 |  |
| <u>SPIN1</u>   | 3 | 1 | 2 |  |
| <u>SPINK4</u>  | 3 | 1 | 2 |  |
| <u>SPINT1</u>  | 3 | 1 | 2 |  |
| <u>SPOCK2</u>  | 3 | 2 | 1 |  |
| <u>SPOP</u>    | 3 | 2 | 1 |  |

|                   |   |   |   |  |
|-------------------|---|---|---|--|
| <u>SPRED2</u>     | 3 | 2 | 1 |  |
| <u>SPTAN1</u>     | 3 | 2 | 1 |  |
| <u>SPTSSA</u>     | 3 | 2 | 1 |  |
| <u>SOLE</u>       | 3 | 2 | 1 |  |
| <u>SQORDL</u>     | 3 | 1 | 2 |  |
| <u>SQSTM1</u>     | 3 | 3 | 0 |  |
| <u>SRC</u>        | 3 | 2 | 1 |  |
| <u>SRD5A3</u>     | 3 | 2 | 1 |  |
| <u>SRGAP2</u>     | 3 | 2 | 1 |  |
| <u>SRGAP3</u>     | 3 | 3 | 0 |  |
| <u>SRPK1</u>      | 3 | 2 | 1 |  |
| <u>SRPK2</u>      | 3 | 1 | 2 |  |
| <u>SRPR</u>       | 3 | 1 | 2 |  |
| <u>SRRD</u>       | 3 | 2 | 1 |  |
| <u>SRRM2</u>      | 3 | 3 | 0 |  |
| <u>SRSF10</u>     | 3 | 1 | 2 |  |
| <u>SRSF11</u>     | 3 | 1 | 2 |  |
| <u>SRSF4</u>      | 3 | 2 | 1 |  |
| <u>SRSF8</u>      | 3 | 1 | 2 |  |
| <u>SS18L1</u>     | 3 | 1 | 2 |  |
| <u>SS18L2</u>     | 3 | 2 | 1 |  |
| <u>SSB</u>        | 3 | 1 | 2 |  |
| <u>SSBP1</u>      | 3 | 2 | 1 |  |
| <u>SSBP3</u>      | 3 | 2 | 1 |  |
| <u>SSR3</u>       | 3 | 1 | 2 |  |
| <u>SSSCA1</u>     | 3 | 1 | 2 |  |
| <u>ST3GAL4</u>    | 3 | 3 | 0 |  |
| <u>ST3GAL6</u>    | 3 | 2 | 1 |  |
| <u>ST6GAL1</u>    | 3 | 3 | 0 |  |
| <u>ST6GALNAC4</u> | 3 | 2 | 1 |  |
| <u>STAM2</u>      | 3 | 2 | 1 |  |
| <u>STAMBP</u>     | 3 | 1 | 2 |  |
| <u>STAP1</u>      | 3 | 2 | 1 |  |
| <u>STARD13</u>    | 3 | 1 | 2 |  |
| <u>STAT3</u>      | 3 | 2 | 1 |  |
| <u>STAT5A</u>     | 3 | 3 | 0 |  |
| <u>STAT5B</u>     | 3 | 0 | 3 |  |
| <u>STAT6</u>      | 3 | 1 | 2 |  |
| <u>STC2</u>       | 3 | 0 | 3 |  |
| <u>STEAP3</u>     | 3 | 1 | 2 |  |
| <u>STEAP4</u>     | 3 | 2 | 1 |  |
| <u>STIM1</u>      | 3 | 2 | 1 |  |
| <u>STK10</u>      | 3 | 2 | 1 |  |
| <u>STK17B</u>     | 3 | 2 | 1 |  |
| <u>STK24</u>      | 3 | 1 | 2 |  |
| <u>STK38L</u>     | 3 | 1 | 2 |  |
| <u>STMN1</u>      | 3 | 1 | 2 |  |
| <u>STMN2</u>      | 3 | 2 | 1 |  |

|                 |   |   |   |  |
|-----------------|---|---|---|--|
| <u>STOML2</u>   | 3 | 2 | 1 |  |
| <u>STRA13</u>   | 3 | 2 | 1 |  |
| <u>STRADA</u>   | 3 | 2 | 1 |  |
| <u>STRAP</u>    | 3 | 0 | 3 |  |
| <u>STRN4</u>    | 3 | 2 | 1 |  |
| <u>STX16</u>    | 3 | 2 | 1 |  |
| <u>STX1A</u>    | 3 | 1 | 2 |  |
| <u>STX3</u>     | 3 | 2 | 1 |  |
| <u>STX7</u>     | 3 | 1 | 2 |  |
| <u>STXBP2</u>   | 3 | 1 | 2 |  |
| <u>SUB1</u>     | 3 | 1 | 2 |  |
| <u>SUCLA2</u>   | 3 | 2 | 1 |  |
| <u>SUMO2</u>    | 3 | 2 | 1 |  |
| <u>SUN1</u>     | 3 | 3 | 0 |  |
| <u>SUN2</u>     | 3 | 1 | 2 |  |
| <u>SURF2</u>    | 3 | 0 | 3 |  |
| <u>SUV39H2</u>  | 3 | 1 | 2 |  |
| <u>SUV420H1</u> | 3 | 1 | 2 |  |
| <u>SUZ12P</u>   | 3 | 2 | 1 |  |
| <u>SV2B</u>     | 3 | 2 | 1 |  |
| <u>SVIL</u>     | 3 | 2 | 1 |  |
| <u>SWAP70</u>   | 3 | 2 | 1 |  |
| <u>SYBU</u>     | 3 | 0 | 3 |  |
| <u>SYCP2</u>    | 3 | 1 | 2 |  |
| <u>SYNGR2</u>   | 3 | 2 | 1 |  |
| <u>SYNJ1</u>    | 3 | 2 | 1 |  |
| <u>SYPL1</u>    | 3 | 1 | 2 |  |
| <u>TAB2</u>     | 3 | 2 | 1 |  |
| <u>TACSTD2</u>  | 3 | 2 | 1 |  |
| <u>TAF11</u>    | 3 | 1 | 2 |  |
| <u>TAF1A</u>    | 3 | 1 | 2 |  |
| <u>TAP1</u>     | 3 | 1 | 2 |  |
| <u>TARP</u>     | 3 | 2 | 1 |  |
| <u>TASP1</u>    | 3 | 2 | 1 |  |
| <u>TATDN2</u>   | 3 | 2 | 1 |  |
| <u>TAX1BP1</u>  | 3 | 1 | 2 |  |
| <u>TBC1D10B</u> | 3 | 1 | 2 |  |
| <u>TBC1D2B</u>  | 3 | 2 | 1 |  |
| <u>TBC1D30</u>  | 3 | 2 | 1 |  |
| <u>TBC1D4</u>   | 3 | 1 | 2 |  |
| <u>TBC1D8</u>   | 3 | 3 | 0 |  |
| <u>TBC1D9B</u>  | 3 | 2 | 1 |  |
| <u>TBCA</u>     | 3 | 2 | 1 |  |
| <u>TBCCD1</u>   | 3 | 0 | 3 |  |
| <u>TBKBP1</u>   | 3 | 1 | 2 |  |
| <u>TBP</u>      | 3 | 2 | 1 |  |
| <u>TBPL1</u>    | 3 | 3 | 0 |  |
| <u>TCEB2</u>    | 3 | 2 | 1 |  |

|                |   |   |   |  |
|----------------|---|---|---|--|
| <u>TCEB3</u>   | 3 | 0 | 3 |  |
| <u>TCF3</u>    | 3 | 3 | 0 |  |
| <u>TCFL5</u>   | 3 | 1 | 2 |  |
| <u>TCIRG1</u>  | 3 | 2 | 1 |  |
| <u>TCL1A</u>   | 3 | 2 | 1 |  |
| <u>TCTA</u>    | 3 | 2 | 1 |  |
| <u>TDG</u>     | 3 | 2 | 1 |  |
| <u>TDRD7</u>   | 3 | 1 | 2 |  |
| <u>TEP1</u>    | 3 | 2 | 1 |  |
| <u>TERT</u>    | 3 | 2 | 1 |  |
| <u>TESK2</u>   | 3 | 1 | 2 |  |
| <u>TEX261</u>  | 3 | 1 | 2 |  |
| <u>TEX264</u>  | 3 | 2 | 1 |  |
| <u>TFAM</u>    | 3 | 1 | 2 |  |
| <u>TFAP2A</u>  | 3 | 3 | 0 |  |
| <u>TFCP2L1</u> | 3 | 1 | 2 |  |
| <u>TFF2</u>    | 3 | 1 | 2 |  |
| <u>TFF3</u>    | 3 | 2 | 1 |  |
| <u>TFG</u>     | 3 | 1 | 2 |  |
| <u>TFIP11</u>  | 3 | 2 | 1 |  |
| <u>TFPI</u>    | 3 | 1 | 2 |  |
| <u>TFPI2</u>   | 3 | 2 | 1 |  |
| <u>TGDS</u>    | 3 | 1 | 2 |  |
| <u>TGFB2</u>   | 3 | 3 | 0 |  |
| <u>TGFBI</u>   | 3 | 1 | 2 |  |
| <u>TGFBR2</u>  | 3 | 0 | 3 |  |
| <u>TGM2</u>    | 3 | 3 | 0 |  |
| <u>THADA</u>   | 3 | 2 | 1 |  |
| <u>THAP4</u>   | 3 | 0 | 3 |  |
| <u>THAP7</u>   | 3 | 2 | 1 |  |
| <u>THNSL1</u>  | 3 | 1 | 2 |  |
| <u>THOC1</u>   | 3 | 1 | 2 |  |
| <u>THOC2</u>   | 3 | 1 | 2 |  |
| <u>THRAP3</u>  | 3 | 2 | 1 |  |
| <u>THSD7A</u>  | 3 | 2 | 1 |  |
| <u>THUMPD1</u> | 3 | 1 | 2 |  |
| <u>THYN1</u>   | 3 | 2 | 1 |  |
| <u>TIMM10</u>  | 3 | 1 | 2 |  |
| <u>TIMM44</u>  | 3 | 2 | 1 |  |
| <u>TIMM8B</u>  | 3 | 2 | 1 |  |
| <u>TIMM9</u>   | 3 | 2 | 1 |  |
| <u>TIMP2</u>   | 3 | 2 | 1 |  |
| <u>TINAGL1</u> | 3 | 2 | 1 |  |
| <u>TIPIN</u>   | 3 | 1 | 2 |  |
| <u>TJP3</u>    | 3 | 1 | 2 |  |
| <u>TK2</u>     | 3 | 1 | 2 |  |
| <u>TLE4</u>    | 3 | 3 | 0 |  |
| <u>TLR2</u>    | 3 | 1 | 2 |  |

|                  |   |   |   |  |
|------------------|---|---|---|--|
| <u>TM9SF1</u>    | 3 | 2 | 1 |  |
| <u>TMBIM1</u>    | 3 | 1 | 2 |  |
| <u>TMCO1</u>     | 3 | 2 | 1 |  |
| <u>TMCO3</u>     | 3 | 1 | 2 |  |
| <u>TMEFF1</u>    | 3 | 2 | 1 |  |
| <u>TMEM14A</u>   | 3 | 1 | 2 |  |
| <u>TMEM14B</u>   | 3 | 2 | 1 |  |
| <u>TMEM159</u>   | 3 | 1 | 2 |  |
| <u>TMEM177</u>   | 3 | 2 | 1 |  |
| <u>TMEM184B</u>  | 3 | 1 | 2 |  |
| <u>TMEM184C</u>  | 3 | 2 | 1 |  |
| <u>TMEM2</u>     | 3 | 1 | 2 |  |
| <u>TMEM231</u>   | 3 | 2 | 1 |  |
| <u>TMEM30B</u>   | 3 | 2 | 1 |  |
| <u>TMEM41B</u>   | 3 | 1 | 2 |  |
| <u>TMEM5</u>     | 3 | 2 | 1 |  |
| <u>TMEM50A</u>   | 3 | 1 | 2 |  |
| <u>TMEM70</u>    | 3 | 1 | 2 |  |
| <u>TMEM8A</u>    | 3 | 1 | 2 |  |
| <u>TMEM93</u>    | 3 | 1 | 2 |  |
| <u>TMEM97</u>    | 3 | 1 | 2 |  |
| <u>TMOD1</u>     | 3 | 1 | 2 |  |
| <u>TMOD3</u>     | 3 | 1 | 2 |  |
| <u>TMPRSS11E</u> | 3 | 1 | 2 |  |
| <u>TNFAIP1</u>   | 3 | 1 | 2 |  |
| <u>TNFRSF10B</u> | 3 | 2 | 1 |  |
| <u>TNFRSF11B</u> | 3 | 1 | 2 |  |
| <u>TNFSF13</u>   | 3 | 1 | 2 |  |
| <u>TNFSF9</u>    | 3 | 1 | 2 |  |
| <u>TNIK</u>      | 3 | 1 | 2 |  |
| <u>TNPO2</u>     | 3 | 2 | 1 |  |
| <u>TNS3</u>      | 3 | 1 | 2 |  |
| <u>TOB2</u>      | 3 | 2 | 1 |  |
| <u>TOLLIP</u>    | 3 | 2 | 1 |  |
| <u>TOMM20</u>    | 3 | 0 | 3 |  |
| <u>TOMM22</u>    | 3 | 2 | 1 |  |
| <u>TOP1</u>      | 3 | 2 | 1 |  |
| <u>TOP2B</u>     | 3 | 2 | 1 |  |
| <u>TOP3A</u>     | 3 | 3 | 0 |  |
| <u>TOR1B</u>     | 3 | 2 | 1 |  |
| <u>TP53BP1</u>   | 3 | 1 | 2 |  |
| <u>TPD52</u>     | 3 | 2 | 1 |  |
| <u>TPD52L2</u>   | 3 | 1 | 2 |  |
| <u>TPM2</u>      | 3 | 1 | 2 |  |
| <u>TPO</u>       | 3 | 2 | 1 |  |
| <u>TPP1</u>      | 3 | 2 | 1 |  |
| <u>TPPP3</u>     | 3 | 2 | 1 |  |
| <u>TPR</u>       | 3 | 2 | 1 |  |

|                 |   |   |   |  |
|-----------------|---|---|---|--|
| <u>TPSB2</u>    | 3 | 1 | 2 |  |
| <u>TPST1</u>    | 3 | 1 | 2 |  |
| <u>TRA2A</u>    | 3 | 3 | 0 |  |
| <u>TRADD</u>    | 3 | 2 | 1 |  |
| <u>TRAFD1</u>   | 3 | 1 | 2 |  |
| <u>TRAM1</u>    | 3 | 1 | 2 |  |
| <u>TRAPPC10</u> | 3 | 1 | 2 |  |
| <u>TRAPPC2</u>  | 3 | 1 | 2 |  |
| <u>TRAPPC2L</u> | 3 | 2 | 1 |  |
| <u>TRAPPC6A</u> | 3 | 1 | 2 |  |
| <u>TRAT1</u>    | 3 | 2 | 1 |  |
| <u>TRIM14</u>   | 3 | 2 | 1 |  |
| <u>TRIM16</u>   | 3 | 1 | 2 |  |
| <u>TRIM17</u>   | 3 | 2 | 1 |  |
| <u>TRIM2</u>    | 3 | 2 | 1 |  |
| <u>TRIM26</u>   | 3 | 1 | 2 |  |
| <u>TRIM36</u>   | 3 | 2 | 1 |  |
| <u>TRIM37</u>   | 3 | 2 | 1 |  |
| <u>TRIM38</u>   | 3 | 1 | 2 |  |
| <u>TRIM9</u>    | 3 | 2 | 1 |  |
| <u>TRIO</u>     | 3 | 2 | 1 |  |
| <u>TRIP13</u>   | 3 | 2 | 1 |  |
| <u>TRIT1</u>    | 3 | 2 | 1 |  |
| <u>TRMT112</u>  | 3 | 2 | 1 |  |
| <u>TRMT12</u>   | 3 | 2 | 1 |  |
| <u>TRMT2B</u>   | 3 | 1 | 2 |  |
| <u>TRMT61B</u>  | 3 | 2 | 1 |  |
| <u>TRMU</u>     | 3 | 1 | 2 |  |
| <u>TRNAU1AP</u> | 3 | 1 | 2 |  |
| <u>TRPC4AP</u>  | 3 | 1 | 2 |  |
| <u>TRPV2</u>    | 3 | 2 | 1 |  |
| <u>TSC1</u>     | 3 | 3 | 0 |  |
| <u>TSC22D2</u>  | 3 | 3 | 0 |  |
| <u>TSEN2</u>    | 3 | 1 | 2 |  |
| <u>TSFM</u>     | 3 | 2 | 1 |  |
| <u>TSPAN13</u>  | 3 | 2 | 1 |  |
| <u>TSPAN6</u>   | 3 | 1 | 2 |  |
| <u>TSPAN7</u>   | 3 | 1 | 2 |  |
| <u>TSPYL5</u>   | 3 | 1 | 2 |  |
| <u>TST</u>      | 3 | 1 | 2 |  |
| <u>TTC1</u>     | 3 | 1 | 2 |  |
| <u>TTC13</u>    | 3 | 1 | 2 |  |
| <u>TTC17</u>    | 3 | 2 | 1 |  |
| <u>TTC23</u>    | 3 | 2 | 1 |  |
| <u>TTC33</u>    | 3 | 1 | 2 |  |
| <u>TTC38</u>    | 3 | 3 | 0 |  |
| <u>TTLL12</u>   | 3 | 2 | 1 |  |
| <u>TTLL4</u>    | 3 | 2 | 1 |  |

|                  |   |   |   |  |
|------------------|---|---|---|--|
| <u>TUBB3</u>     | 3 | 1 | 2 |  |
| <u>TUFT1</u>     | 3 | 2 | 1 |  |
| <u>TUG1</u>      | 3 | 1 | 2 |  |
| <u>TULP4</u>     | 3 | 1 | 2 |  |
| <u>TUSC2</u>     | 3 | 1 | 2 |  |
| <u>TWF2</u>      | 3 | 2 | 1 |  |
| <u>TWSG1</u>     | 3 | 2 | 1 |  |
| <u>TXN2</u>      | 3 | 2 | 1 |  |
| <u>TXNIP</u>     | 3 | 2 | 1 |  |
| <u>TXNRD2</u>    | 3 | 3 | 0 |  |
| <u>TYMS</u>      | 3 | 1 | 2 |  |
| <u>TYR</u>       | 3 | 2 | 1 |  |
| <u>U2AF2</u>     | 3 | 2 | 1 |  |
| <u>U2SURP</u>    | 3 | 1 | 2 |  |
| <u>UAP1L1</u>    | 3 | 2 | 1 |  |
| <u>UBE2A</u>     | 3 | 1 | 2 |  |
| <u>UBE2B</u>     | 3 | 2 | 1 |  |
| <u>UBE2I</u>     | 3 | 2 | 1 |  |
| <u>UBE2J1</u>    | 3 | 1 | 2 |  |
| <u>UBE2Q1</u>    | 3 | 2 | 1 |  |
| <u>UBE2S</u>     | 3 | 1 | 2 |  |
| <u>UBR5</u>      | 3 | 2 | 1 |  |
| <u>UBR7</u>      | 3 | 0 | 3 |  |
| <u>UBXN1</u>     | 3 | 2 | 1 |  |
| <u>UBXN7</u>     | 3 | 1 | 2 |  |
| <u>UBXN8</u>     | 3 | 1 | 2 |  |
| <u>UCHL5</u>     | 3 | 2 | 1 |  |
| <u>UCKL1</u>     | 3 | 2 | 1 |  |
| <u>UCN</u>       | 3 | 2 | 1 |  |
| <u>UFC1</u>      | 3 | 2 | 1 |  |
| <u>UGGT1</u>     | 3 | 2 | 1 |  |
| <u>UGT2A3</u>    | 3 | 1 | 2 |  |
| <u>UGT2B15</u>   | 3 | 2 | 1 |  |
| <u>UHRF1BP1L</u> | 3 | 3 | 0 |  |
| <u>UIMC1</u>     | 3 | 1 | 2 |  |
| <u>ULK2</u>      | 3 | 2 | 1 |  |
| <u>UMOD</u>      | 3 | 2 | 1 |  |
| <u>UNC119</u>    | 3 | 1 | 2 |  |
| <u>UNC50</u>     | 3 | 1 | 2 |  |
| <u>UNC5B</u>     | 3 | 1 | 2 |  |
| <u>UPF3A</u>     | 3 | 0 | 3 |  |
| <u>UQCC</u>      | 3 | 2 | 1 |  |
| <u>UQCRC2</u>    | 3 | 2 | 1 |  |
| <u>UQCRH</u>     | 3 | 1 | 2 |  |
| <u>USP14</u>     | 3 | 0 | 3 |  |
| <u>USP15</u>     | 3 | 1 | 2 |  |
| <u>USP16</u>     | 3 | 1 | 2 |  |
| <u>USP18</u>     | 3 | 2 | 1 |  |

|               |   |   |   |  |
|---------------|---|---|---|--|
| <u>USP34</u>  | 3 | 2 | 1 |  |
| <u>USP39</u>  | 3 | 1 | 2 |  |
| <u>USPL1</u>  | 3 | 1 | 2 |  |
| <u>UST</u>    | 3 | 1 | 2 |  |
| <u>UTP18</u>  | 3 | 1 | 2 |  |
| <u>UTY</u>    | 3 | 2 | 1 |  |
| <u>UXS1</u>   | 3 | 1 | 2 |  |
| <u>UXT</u>    | 3 | 2 | 1 |  |
| <u>VASP</u>   | 3 | 2 | 1 |  |
| <u>VCPIP1</u> | 3 | 3 | 0 |  |
| <u>VDAC1</u>  | 3 | 1 | 2 |  |
| <u>VEZF1</u>  | 3 | 1 | 2 |  |
| <u>VGLL3</u>  | 3 | 2 | 1 |  |
| <u>VIL1</u>   | 3 | 2 | 1 |  |
| <u>VKORC1</u> | 3 | 2 | 1 |  |
| <u>VOPP1</u>  | 3 | 1 | 2 |  |
| <u>VPS11</u>  | 3 | 2 | 1 |  |
| <u>VPS13D</u> | 3 | 2 | 1 |  |
| <u>VPS4A</u>  | 3 | 1 | 2 |  |
| <u>VPS54</u>  | 3 | 1 | 2 |  |
| <u>VPS72</u>  | 3 | 2 | 1 |  |
| <u>VPS8</u>   | 3 | 1 | 2 |  |
| <u>VRK3</u>   | 3 | 2 | 1 |  |
| <u>VTI1B</u>  | 3 | 2 | 1 |  |
| <u>VTN</u>    | 3 | 2 | 1 |  |
| <u>VWA5A</u>  | 3 | 1 | 2 |  |
| <u>WAS</u>    | 3 | 2 | 1 |  |
| <u>WASL</u>   | 3 | 2 | 1 |  |
| <u>WBP11</u>  | 3 | 1 | 2 |  |
| <u>WBP4</u>   | 3 | 2 | 1 |  |
| <u>WDFY3</u>  | 3 | 2 | 1 |  |
| <u>WDR18</u>  | 3 | 2 | 1 |  |
| <u>WDR26</u>  | 3 | 2 | 1 |  |
| <u>WDR41</u>  | 3 | 1 | 2 |  |
| <u>WDR43</u>  | 3 | 1 | 2 |  |
| <u>WDR44</u>  | 3 | 1 | 2 |  |
| <u>WDR45</u>  | 3 | 1 | 2 |  |
| <u>WDR59</u>  | 3 | 3 | 0 |  |
| <u>WDR62</u>  | 3 | 1 | 2 |  |
| <u>WDR74</u>  | 3 | 1 | 2 |  |
| <u>WEE1</u>   | 3 | 2 | 1 |  |
| <u>WHSC1</u>  | 3 | 2 | 1 |  |
| <u>WIPF2</u>  | 3 | 1 | 2 |  |
| <u>WIP11</u>  | 3 | 2 | 1 |  |
| <u>WIP12</u>  | 3 | 1 | 2 |  |
| <u>WIZ</u>    | 3 | 2 | 1 |  |
| <u>WRAP53</u> | 3 | 2 | 1 |  |
| <u>WRN</u>    | 3 | 2 | 1 |  |

|                |   |   |   |  |
|----------------|---|---|---|--|
| <u>WSB1</u>    | 3 | 2 | 1 |  |
| <u>WSCD1</u>   | 3 | 2 | 1 |  |
| <u>WWP1</u>    | 3 | 1 | 2 |  |
| <u>WWP2</u>    | 3 | 2 | 1 |  |
| <u>WWTR1</u>   | 3 | 3 | 0 |  |
| <u>XAF1</u>    | 3 | 1 | 2 |  |
| <u>XBP1</u>    | 3 | 1 | 2 |  |
| <u>XIAP</u>    | 3 | 3 | 0 |  |
| <u>XPA</u>     | 3 | 1 | 2 |  |
| <u>XPC</u>     | 3 | 1 | 2 |  |
| <u>XPNPEP2</u> | 3 | 2 | 1 |  |
| <u>XRCC1</u>   | 3 | 1 | 2 |  |
| <u>YEATS2</u>  | 3 | 2 | 1 |  |
| <u>YIPF1</u>   | 3 | 1 | 2 |  |
| <u>YIPF2</u>   | 3 | 1 | 2 |  |
| <u>YIPF3</u>   | 3 | 1 | 2 |  |
| <u>YOD1</u>    | 3 | 2 | 1 |  |
| <u>YPEL5</u>   | 3 | 1 | 2 |  |
| <u>YTHDF3</u>  | 3 | 1 | 2 |  |
| <u>YWHAQ</u>   | 3 | 2 | 1 |  |
| <u>YY1AP1</u>  | 3 | 2 | 1 |  |
| <u>ZBED5</u>   | 3 | 2 | 1 |  |
| <u>ZBTB11</u>  | 3 | 1 | 2 |  |
| <u>ZBTB24</u>  | 3 | 1 | 2 |  |
| <u>ZBTB38</u>  | 3 | 1 | 2 |  |
| <u>ZBTB39</u>  | 3 | 1 | 2 |  |
| <u>ZBTB48</u>  | 3 | 2 | 1 |  |
| <u>ZBTB5</u>   | 3 | 2 | 1 |  |
| <u>ZC3H14</u>  | 3 | 0 | 3 |  |
| <u>ZC3H7A</u>  | 3 | 2 | 1 |  |
| <u>ZC3HAV1</u> | 3 | 1 | 2 |  |
| <u>ZCCHC14</u> | 3 | 2 | 1 |  |
| <u>ZCCHC2</u>  | 3 | 1 | 2 |  |
| <u>ZDHHC14</u> | 3 | 1 | 2 |  |
| <u>ZDHHC17</u> | 3 | 3 | 0 |  |
| <u>ZDHHC4</u>  | 3 | 1 | 2 |  |
| <u>ZDHHC6</u>  | 3 | 1 | 2 |  |
| <u>ZFAND6</u>  | 3 | 1 | 2 |  |
| <u>ZFC3H1</u>  | 3 | 1 | 2 |  |
| <u>ZFHX4</u>   | 3 | 2 | 1 |  |
| <u>ZFP106</u>  | 3 | 1 | 2 |  |
| <u>ZFP30</u>   | 3 | 1 | 2 |  |
| <u>ZFP36L1</u> | 3 | 3 | 0 |  |
| <u>ZFR</u>     | 3 | 2 | 1 |  |
| <u>ZFYVE16</u> | 3 | 2 | 1 |  |
| <u>ZFYVE21</u> | 3 | 1 | 2 |  |
| <u>ZFYVE26</u> | 3 | 2 | 1 |  |
| <u>ZG16</u>    | 3 | 1 | 2 |  |

|         |   |   |   |  |
|---------|---|---|---|--|
| ZGPAT   | 3 | 1 | 2 |  |
| ZHX2    | 3 | 2 | 1 |  |
| ZIC1    | 3 | 1 | 2 |  |
| ZKSCAN5 | 3 | 1 | 2 |  |
| ZMIZ1   | 3 | 2 | 1 |  |
| ZMYM2   | 3 | 3 | 0 |  |
| ZMYM5   | 3 | 2 | 1 |  |
| ZMYND8  | 3 | 2 | 1 |  |
| ZNF12   | 3 | 1 | 2 |  |
| ZNF133  | 3 | 1 | 2 |  |
| ZNF134  | 3 | 2 | 1 |  |
| ZNF136  | 3 | 1 | 2 |  |
| ZNF143  | 3 | 1 | 2 |  |
| ZNF185  | 3 | 2 | 1 |  |
| ZNF200  | 3 | 2 | 1 |  |
| ZNF202  | 3 | 1 | 2 |  |
| ZNF207  | 3 | 1 | 2 |  |
| ZNF211  | 3 | 2 | 1 |  |
| ZNF226  | 3 | 2 | 1 |  |
| ZNF24   | 3 | 1 | 2 |  |
| ZNF268  | 3 | 2 | 1 |  |
| ZNF271  | 3 | 1 | 2 |  |
| ZNF281  | 3 | 1 | 2 |  |
| ZNF282  | 3 | 2 | 1 |  |
| ZNF304  | 3 | 1 | 2 |  |
| ZNF324  | 3 | 3 | 0 |  |
| ZNF33B  | 3 | 2 | 1 |  |
| ZNF35   | 3 | 2 | 1 |  |
| ZNF354A | 3 | 1 | 2 |  |
| ZNF358  | 3 | 2 | 1 |  |
| ZNF394  | 3 | 2 | 1 |  |
| ZNF467  | 3 | 3 | 0 |  |
| ZNF500  | 3 | 1 | 2 |  |
| ZNF510  | 3 | 2 | 1 |  |
| ZNF544  | 3 | 1 | 2 |  |
| ZNF573  | 3 | 2 | 1 |  |
| ZNF576  | 3 | 2 | 1 |  |
| ZNF580  | 3 | 2 | 1 |  |
| ZNF589  | 3 | 1 | 2 |  |
| ZNF592  | 3 | 2 | 1 |  |
| ZNF606  | 3 | 1 | 2 |  |
| ZNF609  | 3 | 3 | 0 |  |
| ZNF623  | 3 | 1 | 2 |  |
| ZNF652  | 3 | 1 | 2 |  |
| ZNF688  | 3 | 2 | 1 |  |
| ZNF710  | 3 | 1 | 2 |  |
| ZNF764  | 3 | 2 | 1 |  |
| ZNF83   | 3 | 1 | 2 |  |

|                |   |   |   |  |
|----------------|---|---|---|--|
| ZNF835         | 3 | 2 | 1 |  |
| ZNF85          | 3 | 1 | 2 |  |
| ZNF93          | 3 | 1 | 2 |  |
| ZSCAN16        | 3 | 1 | 2 |  |
| ZWILCH         | 3 | 1 | 2 |  |
| ZXDC           | 3 | 0 | 3 |  |
| <u>ABCA3</u>   | 2 | 0 | 2 |  |
| <u>ABCA8</u>   | 2 | 0 | 2 |  |
| <u>ABCC2</u>   | 2 | 2 | 0 |  |
| <u>ABCC5</u>   | 2 | 0 | 2 |  |
| <u>ABCC6</u>   | 2 | 2 | 0 |  |
| <u>ABCC9</u>   | 2 | 2 | 0 |  |
| <u>ABHD8</u>   | 2 | 2 | 0 |  |
| <u>ABI2</u>    | 2 | 2 | 0 |  |
| <u>ABO</u>     | 2 | 2 | 0 |  |
| <u>ABTB2</u>   | 2 | 0 | 2 |  |
| <u>ACAD8</u>   | 2 | 2 | 0 |  |
| ACCN1          | 2 | 2 | 0 |  |
| <u>ACE</u>     | 2 | 2 | 0 |  |
| <u>ACE2</u>    | 2 | 2 | 0 |  |
| <u>ACPP</u>    | 2 | 2 | 0 |  |
| ACSBG2         | 2 | 2 | 0 |  |
| <u>ACSF2</u>   | 2 | 0 | 2 |  |
| ACTL7B         | 2 | 2 | 0 |  |
| <u>ACTR1A</u>  | 2 | 0 | 2 |  |
| <u>ACVR1B</u>  | 2 | 2 | 0 |  |
| <u>ADA</u>     | 2 | 2 | 0 |  |
| <u>ADAM11</u>  | 2 | 2 | 0 |  |
| <u>ADAM12</u>  | 2 | 2 | 0 |  |
| <u>ADAMTS5</u> | 2 | 0 | 2 |  |
| <u>ADAMTS6</u> | 2 | 2 | 0 |  |
| <u>ADAMTS7</u> | 2 | 2 | 0 |  |
| <u>ADAMTS8</u> | 2 | 2 | 0 |  |
| <u>ADAMTS9</u> | 2 | 0 | 2 |  |
| <u>ADARB2</u>  | 2 | 2 | 0 |  |
| <u>ADCY10</u>  | 2 | 2 | 0 |  |
| <u>ADCY2</u>   | 2 | 2 | 0 |  |
| <u>ADCY8</u>   | 2 | 2 | 0 |  |
| <u>ADH1A</u>   | 2 | 2 | 0 |  |
| <u>ADK</u>     | 2 | 0 | 2 |  |
| <u>ADRA1D</u>  | 2 | 2 | 0 |  |
| <u>ADRB2</u>   | 2 | 2 | 0 |  |
| <u>ADRBK1</u>  | 2 | 2 | 0 |  |
| <u>ADRBK2</u>  | 2 | 2 | 0 |  |
| <u>AFM</u>     | 2 | 2 | 0 |  |
| <u>AGPAT1</u>  | 2 | 0 | 2 |  |
| <u>AGRN</u>    | 2 | 2 | 0 |  |
| <u>AHCYL1</u>  | 2 | 2 | 0 |  |

|                 |   |   |   |  |
|-----------------|---|---|---|--|
| <u>AHNAK2</u>   | 2 | 0 | 2 |  |
| <u>AHR</u>      | 2 | 0 | 2 |  |
| <u>AICDA</u>    | 2 | 2 | 0 |  |
| <u>AIF1</u>     | 2 | 2 | 0 |  |
| <u>AIMP2</u>    | 2 | 0 | 2 |  |
| <u>AKAP17A</u>  | 2 | 2 | 0 |  |
| <u>AKAP5</u>    | 2 | 2 | 0 |  |
| <u>AKAP8L</u>   | 2 | 2 | 0 |  |
| <u>AKR1C1</u>   | 2 | 0 | 2 |  |
| <u>AKT2</u>     | 2 | 2 | 0 |  |
| <u>ALAS2</u>    | 2 | 0 | 2 |  |
| <u>ALDH1B1</u>  | 2 | 2 | 0 |  |
| <u>ALDH1L1</u>  | 2 | 0 | 2 |  |
| <u>ALDH7A1</u>  | 2 | 2 | 0 |  |
| <u>ALDOA</u>    | 2 | 2 | 0 |  |
| <u>ALOX15B</u>  | 2 | 2 | 0 |  |
| <u>ALOX5</u>    | 2 | 2 | 0 |  |
| <u>ALPP</u>     | 2 | 2 | 0 |  |
| <u>ALS2CR8</u>  | 2 | 2 | 0 |  |
| <u>ALX1</u>     | 2 | 2 | 0 |  |
| <u>AMACR</u>    | 2 | 2 | 0 |  |
| <u>AMOT</u>     | 2 | 2 | 0 |  |
| <u>AMPD3</u>    | 2 | 2 | 0 |  |
| <u>ANAPC1</u>   | 2 | 2 | 0 |  |
| <u>ANAPC5</u>   | 2 | 0 | 2 |  |
| <u>ANK2</u>     | 2 | 2 | 0 |  |
| <u>ANKLE2</u>   | 2 | 0 | 2 |  |
| <u>ANKMY1</u>   | 2 | 2 | 0 |  |
| <u>ANKRD40</u>  | 2 | 2 | 0 |  |
| <u>ANKRD53</u>  | 2 | 2 | 0 |  |
| <u>ANXA6</u>    | 2 | 0 | 2 |  |
| <u>ANXA7</u>    | 2 | 0 | 2 |  |
| <u>APIG1</u>    | 2 | 0 | 2 |  |
| <u>AP2A2</u>    | 2 | 2 | 0 |  |
| <u>AP4M1</u>    | 2 | 2 | 0 |  |
| <u>APC</u>      | 2 | 2 | 0 |  |
| <u>APIP</u>     | 2 | 0 | 2 |  |
| <u>APOA2</u>    | 2 | 2 | 0 |  |
| <u>APOF</u>     | 2 | 2 | 0 |  |
| <u>APOL5</u>    | 2 | 2 | 0 |  |
| <u>AQP3</u>     | 2 | 0 | 2 |  |
| <u>AQP5</u>     | 2 | 0 | 2 |  |
| <u>AQP7</u>     | 2 | 2 | 0 |  |
| <u>AQP8</u>     | 2 | 2 | 0 |  |
| <u>AREG</u>     | 2 | 2 | 0 |  |
| <u>ARHGAP22</u> | 2 | 2 | 0 |  |
| <u>ARHGAP26</u> | 2 | 2 | 0 |  |
| <u>ARHGAP33</u> | 2 | 2 | 0 |  |

|                 |   |   |   |  |
|-----------------|---|---|---|--|
| <u>ARHGEF16</u> | 2 | 2 | 0 |  |
| <u>ARHGEF17</u> | 2 | 2 | 0 |  |
| <u>ARHGEF18</u> | 2 | 0 | 2 |  |
| <u>ARHGEF4</u>  | 2 | 2 | 0 |  |
| <u>ARL4D</u>    | 2 | 2 | 0 |  |
| <u>ARL5A</u>    | 2 | 2 | 0 |  |
| <u>ARPC1A</u>   | 2 | 0 | 2 |  |
| <u>ARPC5</u>    | 2 | 2 | 0 |  |
| <u>ARPP19</u>   | 2 | 2 | 0 |  |
| <u>ARRB2</u>    | 2 | 2 | 0 |  |
| <u>ARSD</u>     | 2 | 2 | 0 |  |
| <u>ARSE</u>     | 2 | 2 | 0 |  |
| <u>ARSJ</u>     | 2 | 2 | 0 |  |
| <u>ART1</u>     | 2 | 2 | 0 |  |
| <u>ART4</u>     | 2 | 2 | 0 |  |
| <u>ARTN</u>     | 2 | 2 | 0 |  |
| <u>ASAP1</u>    | 2 | 0 | 2 |  |
| <u>ASAP2</u>    | 2 | 0 | 2 |  |
| <u>ASGR1</u>    | 2 | 2 | 0 |  |
| <u>ASIP</u>     | 2 | 2 | 0 |  |
| <u>ASMT</u>     | 2 | 2 | 0 |  |
| <u>ASNS</u>     | 2 | 0 | 2 |  |
| <u>ASNSD1</u>   | 2 | 0 | 2 |  |
| <u>ASPN</u>     | 2 | 0 | 2 |  |
| <u>ASS1</u>     | 2 | 2 | 0 |  |
| <u>ATF1</u>     | 2 | 0 | 2 |  |
| <u>ATF3</u>     | 2 | 0 | 2 |  |
| <u>ATF7IP</u>   | 2 | 2 | 0 |  |
| <u>ATG10</u>    | 2 | 2 | 0 |  |
| <u>ATG12</u>    | 2 | 2 | 0 |  |
| <u>ATG16L1</u>  | 2 | 2 | 0 |  |
| <u>ATG3</u>     | 2 | 0 | 2 |  |
| <u>ATG7</u>     | 2 | 2 | 0 |  |
| <u>ATP10B</u>   | 2 | 2 | 0 |  |
| <u>ATP11B</u>   | 2 | 2 | 0 |  |
| <u>ATP2A3</u>   | 2 | 2 | 0 |  |
| <u>ATP2B4</u>   | 2 | 2 | 0 |  |
| <u>ATP5B</u>    | 2 | 0 | 2 |  |
| <u>ATP5F1</u>   | 2 | 2 | 0 |  |
| <u>ATP6AP2</u>  | 2 | 2 | 0 |  |
| <u>ATP6V1E1</u> | 2 | 0 | 2 |  |
| <u>ATP6V1G2</u> | 2 | 2 | 0 |  |
| <u>ATP8A1</u>   | 2 | 2 | 0 |  |
| <u>ATR</u>      | 2 | 0 | 2 |  |
| <u>ATRN</u>     | 2 | 0 | 2 |  |
| <u>ATXN7L1</u>  | 2 | 2 | 0 |  |
| <u>AUH</u>      | 2 | 2 | 0 |  |
| <u>AVEN</u>     | 2 | 0 | 2 |  |

|                  |   |   |   |  |
|------------------|---|---|---|--|
| <u>AVIL</u>      | 2 | 2 | 0 |  |
| B3GALT2          | 2 | 2 | 0 |  |
| <u>B4GALT6</u>   | 2 | 2 | 0 |  |
| <u>BACE2</u>     | 2 | 0 | 2 |  |
| <u>BARX1</u>     | 2 | 2 | 0 |  |
| <u>BAX</u>       | 2 | 2 | 0 |  |
| <u>BBIP1</u>     | 2 | 0 | 2 |  |
| <u>BCAR3</u>     | 2 | 0 | 2 |  |
| <u>BCAS2</u>     | 2 | 0 | 2 |  |
| <u>BCAS3</u>     | 2 | 2 | 0 |  |
| <u>BCCIP</u>     | 2 | 0 | 2 |  |
| <u>BCKDHB</u>    | 2 | 0 | 2 |  |
| <u>BCL2A1</u>    | 2 | 0 | 2 |  |
| <u>BCL3</u>      | 2 | 2 | 0 |  |
| <u>BEX1</u>      | 2 | 0 | 2 |  |
| <u>BICC1</u>     | 2 | 2 | 0 |  |
| <u>BIN3</u>      | 2 | 0 | 2 |  |
| <u>BLCAP</u>     | 2 | 0 | 2 |  |
| <u>BLMH</u>      | 2 | 2 | 0 |  |
| <u>BLZF1</u>     | 2 | 2 | 0 |  |
| <u>BMP1</u>      | 2 | 2 | 0 |  |
| BMP10            | 2 | 2 | 0 |  |
| <u>BMP5</u>      | 2 | 2 | 0 |  |
| <u>BRCA1</u>     | 2 | 0 | 2 |  |
| <u>BRD1</u>      | 2 | 2 | 0 |  |
| <u>BRD7P3</u>    | 2 | 2 | 0 |  |
| <u>BRS3</u>      | 2 | 2 | 0 |  |
| <u>BSDC1</u>     | 2 | 0 | 2 |  |
| <u>BTC</u>       | 2 | 2 | 0 |  |
| <u>BTG2</u>      | 2 | 2 | 0 |  |
| BTNL3            | 2 | 2 | 0 |  |
| <u>BZRAP1</u>    | 2 | 0 | 2 |  |
| <u>C10ORF137</u> | 2 | 2 | 0 |  |
| C11ORF2          | 2 | 2 | 0 |  |
| <u>C11ORF49</u>  | 2 | 2 | 0 |  |
| C11ORF51         | 2 | 2 | 0 |  |
| <u>C11ORF73</u>  | 2 | 0 | 2 |  |
| <u>C11ORF9</u>   | 2 | 2 | 0 |  |
| C12ORF10         | 2 | 0 | 2 |  |
| C12ORF41         | 2 | 0 | 2 |  |
| <u>C12ORF43</u>  | 2 | 0 | 2 |  |
| C13ORF27         | 2 | 0 | 2 |  |
| <u>C14ORF132</u> | 2 | 2 | 0 |  |
| <u>C14ORF162</u> | 2 | 2 | 0 |  |
| C14ORF56         | 2 | 2 | 0 |  |
| <u>C14ORF79</u>  | 2 | 2 | 0 |  |
| C15ORF29         | 2 | 0 | 2 |  |
| <u>C15ORF39</u>  | 2 | 2 | 0 |  |

|                  |   |   |   |  |
|------------------|---|---|---|--|
| <u>C16ORF62</u>  | 2 | 2 | 0 |  |
| C17ORF81         | 2 | 2 | 0 |  |
| C18ORF10         | 2 | 2 | 0 |  |
| C19ORF22         | 2 | 2 | 0 |  |
| C19ORF50         | 2 | 2 | 0 |  |
| <u>C19ORF6</u>   | 2 | 2 | 0 |  |
| <u>C19ORF60</u>  | 2 | 2 | 0 |  |
| <u>C19ORF73</u>  | 2 | 2 | 0 |  |
| <u>C19ORF80</u>  | 2 | 2 | 0 |  |
| <u>C1ORF106</u>  | 2 | 2 | 0 |  |
| C1ORF144         | 2 | 2 | 0 |  |
| <u>C1ORF27</u>   | 2 | 0 | 2 |  |
| <u>C1QA</u>      | 2 | 2 | 0 |  |
| <u>C2</u>        | 2 | 2 | 0 |  |
| <u>C20ORF111</u> | 2 | 0 | 2 |  |
| <u>C20ORF195</u> | 2 | 2 | 0 |  |
| <u>C20ORF20</u>  | 2 | 2 | 0 |  |
| <u>C20ORF24</u>  | 2 | 0 | 2 |  |
| C20ORF4          | 2 | 0 | 2 |  |
| C21ORF2          | 2 | 2 | 0 |  |
| <u>C21ORF7</u>   | 2 | 2 | 0 |  |
| C21ORF96         | 2 | 2 | 0 |  |
| C22ORF24         | 2 | 2 | 0 |  |
| C22ORF26         | 2 | 2 | 0 |  |
| <u>C22ORF43</u>  | 2 | 2 | 0 |  |
| <u>C2CD2</u>     | 2 | 0 | 2 |  |
| <u>C2CD2L</u>    | 2 | 0 | 2 |  |
| <u>C2ORF43</u>   | 2 | 2 | 0 |  |
| <u>C2ORF49</u>   | 2 | 0 | 2 |  |
| <u>C2ORF54</u>   | 2 | 2 | 0 |  |
| C2ORF83          | 2 | 2 | 0 |  |
| <u>C3ORF32</u>   | 2 | 2 | 0 |  |
| C3ORF51          | 2 | 2 | 0 |  |
| C3ORF75          | 2 | 2 | 0 |  |
| <u>C5ORF28</u>   | 2 | 2 | 0 |  |
| <u>C5ORF44</u>   | 2 | 2 | 0 |  |
| C6ORF123         | 2 | 2 | 0 |  |
| C7ORF28B         | 2 | 2 | 0 |  |
| C7ORF54          | 2 | 2 | 0 |  |
| C7ORF58          | 2 | 2 | 0 |  |
| <u>C8G</u>       | 2 | 2 | 0 |  |
| C8ORF55          | 2 | 2 | 0 |  |
| <u>C9ORF156</u>  | 2 | 2 | 0 |  |
| C9ORF46          | 2 | 0 | 2 |  |
| <u>C9ORF53</u>   | 2 | 2 | 0 |  |
| C9ORF7           | 2 | 2 | 0 |  |
| <u>C9ORF78</u>   | 2 | 0 | 2 |  |
| C9ORF95          | 2 | 0 | 2 |  |

|                 |   |   |   |  |
|-----------------|---|---|---|--|
| <u>CA1</u>      | 2 | 2 | 0 |  |
| CA5B            | 2 | 2 | 0 |  |
| <u>CACNA1F</u>  | 2 | 2 | 0 |  |
| <u>CACNA1G</u>  | 2 | 2 | 0 |  |
| <u>CACNA2D1</u> | 2 | 2 | 0 |  |
| <u>CACNA2D2</u> | 2 | 2 | 0 |  |
| <u>CACNB3</u>   | 2 | 0 | 2 |  |
| <u>CACNB4</u>   | 2 | 2 | 0 |  |
| <u>CACNG2</u>   | 2 | 2 | 0 |  |
| <u>CADM4</u>    | 2 | 2 | 0 |  |
| <u>CADPS</u>    | 2 | 2 | 0 |  |
| <u>CALCR</u>    | 2 | 2 | 0 |  |
| <u>CALD1</u>    | 2 | 2 | 0 |  |
| <u>CALHM2</u>   | 2 | 2 | 0 |  |
| <u>CALML5</u>   | 2 | 2 | 0 |  |
| <u>CAMK1G</u>   | 2 | 2 | 0 |  |
| <u>CAMK2A</u>   | 2 | 2 | 0 |  |
| <u>CAMK2G</u>   | 2 | 2 | 0 |  |
| <u>CAPN10</u>   | 2 | 2 | 0 |  |
| <u>CAPN11</u>   | 2 | 2 | 0 |  |
| <u>CAPN3</u>    | 2 | 0 | 2 |  |
| <u>CAPN6</u>    | 2 | 2 | 0 |  |
| <u>CARS</u>     | 2 | 0 | 2 |  |
| <u>CARTPT</u>   | 2 | 2 | 0 |  |
| <u>CASP10</u>   | 2 | 2 | 0 |  |
| <u>CASP3</u>    | 2 | 2 | 0 |  |
| <u>CASR</u>     | 2 | 2 | 0 |  |
| CASS4           | 2 | 2 | 0 |  |
| <u>CBL</u>      | 2 | 2 | 0 |  |
| CBLC            | 2 | 2 | 0 |  |
| <u>CBX7</u>     | 2 | 0 | 2 |  |
| <u>CCDC109B</u> | 2 | 2 | 0 |  |
| CCDC165         | 2 | 2 | 0 |  |
| <u>CCDC28B</u>  | 2 | 2 | 0 |  |
| <u>CCDC30</u>   | 2 | 2 | 0 |  |
| CCDC40          | 2 | 2 | 0 |  |
| <u>CCDC59</u>   | 2 | 0 | 2 |  |
| <u>CCDC64</u>   | 2 | 2 | 0 |  |
| <u>CCDC85B</u>  | 2 | 2 | 0 |  |
| <u>CCL11</u>    | 2 | 2 | 0 |  |
| <u>CCL13</u>    | 2 | 2 | 0 |  |
| <u>CCL4</u>     | 2 | 2 | 0 |  |
| <u>CCNA1</u>    | 2 | 2 | 0 |  |
| <u>CCND2</u>    | 2 | 2 | 0 |  |
| <u>CCNG1</u>    | 2 | 0 | 2 |  |
| <u>CCNJL</u>    | 2 | 2 | 0 |  |
| <u>CCR7</u>     | 2 | 0 | 2 |  |
| <u>CCR8</u>     | 2 | 2 | 0 |  |

|                 |   |   |   |  |
|-----------------|---|---|---|--|
| <u>CCR9</u>     | 2 | 2 | 0 |  |
| <u>CCRL1</u>    | 2 | 2 | 0 |  |
| <u>CD163</u>    | 2 | 2 | 0 |  |
| <u>CD2AP</u>    | 2 | 2 | 0 |  |
| <u>CD300C</u>   | 2 | 2 | 0 |  |
| <u>CD302</u>    | 2 | 0 | 2 |  |
| <u>CD3EAP</u>   | 2 | 0 | 2 |  |
| <u>CD53</u>     | 2 | 2 | 0 |  |
| <u>CD68</u>     | 2 | 2 | 0 |  |
| <u>CD83</u>     | 2 | 2 | 0 |  |
| <u>CD84</u>     | 2 | 2 | 0 |  |
| <u>CD93</u>     | 2 | 2 | 0 |  |
| <u>CD97</u>     | 2 | 2 | 0 |  |
| <u>CDADC1</u>   | 2 | 2 | 0 |  |
| <u>CDC14A</u>   | 2 | 2 | 0 |  |
| <u>CDC20</u>    | 2 | 2 | 0 |  |
| <u>CDC37L1</u>  | 2 | 0 | 2 |  |
| <u>CDC42EP3</u> | 2 | 2 | 0 |  |
| <u>CDC7</u>     | 2 | 0 | 2 |  |
| <u>CDH1</u>     | 2 | 0 | 2 |  |
| <u>CDH11</u>    | 2 | 2 | 0 |  |
| <u>CDH5</u>     | 2 | 2 | 0 |  |
| <u>CDH6</u>     | 2 | 2 | 0 |  |
| <u>CDH8</u>     | 2 | 2 | 0 |  |
| <u>CDH9</u>     | 2 | 2 | 0 |  |
| <u>CDHR1</u>    | 2 | 2 | 0 |  |
| <u>CDK11A</u>   | 2 | 0 | 2 |  |
| <u>CDK13</u>    | 2 | 2 | 0 |  |
| <u>CDK18</u>    | 2 | 2 | 0 |  |
| <u>CDK5R1</u>   | 2 | 2 | 0 |  |
| <u>CDKL1</u>    | 2 | 2 | 0 |  |
| <u>CDKL2</u>    | 2 | 2 | 0 |  |
| <u>CDKN2D</u>   | 2 | 2 | 0 |  |
| <u>CDKN3</u>    | 2 | 0 | 2 |  |
| <u>CDS1</u>     | 2 | 2 | 0 |  |
| <u>CDX1</u>     | 2 | 2 | 0 |  |
| <u>CEBPA</u>    | 2 | 2 | 0 |  |
| <u>CEBPB</u>    | 2 | 0 | 2 |  |
| <u>CEBPE</u>    | 2 | 2 | 0 |  |
| <u>CEBPZ</u>    | 2 | 2 | 0 |  |
| <u>CECR5</u>    | 2 | 2 | 0 |  |
| <u>CELA2A</u>   | 2 | 2 | 0 |  |
| <u>CELA3A</u>   | 2 | 2 | 0 |  |
| <u>CELA3B</u>   | 2 | 2 | 0 |  |
| <u>CELP</u>     | 2 | 2 | 0 |  |
| <u>CELSR1</u>   | 2 | 2 | 0 |  |
| <u>CENPE</u>    | 2 | 2 | 0 |  |
| <u>CENPM</u>    | 2 | 2 | 0 |  |

|                |   |   |   |  |
|----------------|---|---|---|--|
| <u>CENPO</u>   | 2 | 2 | 0 |  |
| <u>CENPQ</u>   | 2 | 2 | 0 |  |
| <u>CEP135</u>  | 2 | 2 | 0 |  |
| <u>CEP72</u>   | 2 | 2 | 0 |  |
| <u>CERS4</u>   | 2 | 0 | 2 |  |
| <u>CETN1</u>   | 2 | 2 | 0 |  |
| <u>CETN2</u>   | 2 | 0 | 2 |  |
| <u>CFB</u>     | 2 | 2 | 0 |  |
| <u>CFTR</u>    | 2 | 2 | 0 |  |
| <u>CHAT</u>    | 2 | 2 | 0 |  |
| <u>CHCHD2</u>  | 2 | 0 | 2 |  |
| <u>CHCHD3</u>  | 2 | 2 | 0 |  |
| <u>CHD8</u>    | 2 | 2 | 0 |  |
| <u>CHGB</u>    | 2 | 2 | 0 |  |
| <u>CHIC2</u>   | 2 | 2 | 0 |  |
| <u>CHML</u>    | 2 | 2 | 0 |  |
| <u>CHMP5</u>   | 2 | 0 | 2 |  |
| <u>CHMP7</u>   | 2 | 0 | 2 |  |
| <u>CHODL</u>   | 2 | 2 | 0 |  |
| <u>CHORDC1</u> | 2 | 0 | 2 |  |
| <u>CHP</u>     | 2 | 0 | 2 |  |
| <u>CHRNA2</u>  | 2 | 2 | 0 |  |
| <u>CHRNA5</u>  | 2 | 2 | 0 |  |
| <u>CHRNA6</u>  | 2 | 2 | 0 |  |
| <u>CHST3</u>   | 2 | 2 | 0 |  |
| <u>CHST4</u>   | 2 | 2 | 0 |  |
| <u>CHST7</u>   | 2 | 2 | 0 |  |
| <u>CHSY1</u>   | 2 | 0 | 2 |  |
| <u>CIB2</u>    | 2 | 2 | 0 |  |
| <u>CIITA</u>   | 2 | 2 | 0 |  |
| <u>CIRBP</u>   | 2 | 0 | 2 |  |
| <u>CISD1</u>   | 2 | 2 | 0 |  |
| <u>CKAP2</u>   | 2 | 0 | 2 |  |
| <u>CLCN2</u>   | 2 | 0 | 2 |  |
| <u>CLDN3</u>   | 2 | 2 | 0 |  |
| <u>CLDN5</u>   | 2 | 2 | 0 |  |
| <u>CLDN9</u>   | 2 | 2 | 0 |  |
| <u>CLEC3B</u>  | 2 | 0 | 2 |  |
| <u>CLIC4</u>   | 2 | 0 | 2 |  |
| <u>CLN3</u>    | 2 | 0 | 2 |  |
| <u>CLN5</u>    | 2 | 0 | 2 |  |
| <u>CLPS</u>    | 2 | 2 | 0 |  |
| <u>CLPTM1</u>  | 2 | 2 | 0 |  |
| <u>CLTA</u>    | 2 | 2 | 0 |  |
| <u>CMA1</u>    | 2 | 2 | 0 |  |
| <u>CMTM6</u>   | 2 | 0 | 2 |  |
| <u>CNDP2</u>   | 2 | 2 | 0 |  |
| <u>CNKSR2</u>  | 2 | 2 | 0 |  |

|                   |   |   |   |  |
|-------------------|---|---|---|--|
| <u>CNN3</u>       | 2 | 2 | 0 |  |
| <u>CNNM4</u>      | 2 | 2 | 0 |  |
| <u>CNOT4</u>      | 2 | 2 | 0 |  |
| <u>CNR1</u>       | 2 | 2 | 0 |  |
| <u>COASY</u>      | 2 | 0 | 2 |  |
| <u>COBL</u>       | 2 | 0 | 2 |  |
| <u>COL10A1</u>    | 2 | 0 | 2 |  |
| <u>COL13A1</u>    | 2 | 2 | 0 |  |
| <u>COL18A1</u>    | 2 | 2 | 0 |  |
| <u>COL19A1</u>    | 2 | 2 | 0 |  |
| <u>COL1A2</u>     | 2 | 2 | 0 |  |
| <u>COL4A3</u>     | 2 | 2 | 0 |  |
| <u>COL4A4</u>     | 2 | 2 | 0 |  |
| <u>COL6A1</u>     | 2 | 2 | 0 |  |
| <u>COLEC11</u>    | 2 | 2 | 0 |  |
| <u>COLEC12</u>    | 2 | 2 | 0 |  |
| <u>COPA</u>       | 2 | 2 | 0 |  |
| <u>COPS4</u>      | 2 | 2 | 0 |  |
| <u>COQ6</u>       | 2 | 0 | 2 |  |
| <u>CORO1A</u>     | 2 | 2 | 0 |  |
| <u>CORO2B</u>     | 2 | 2 | 0 |  |
| <u>CORO7</u>      | 2 | 2 | 0 |  |
| <u>COX11</u>      | 2 | 0 | 2 |  |
| <u>COX15</u>      | 2 | 0 | 2 |  |
| <u>COX6A1</u>     | 2 | 0 | 2 |  |
| <u>COX7A1</u>     | 2 | 0 | 2 |  |
| <u>COX7B</u>      | 2 | 0 | 2 |  |
| <u>CPA1</u>       | 2 | 2 | 0 |  |
| <u>CPA3</u>       | 2 | 2 | 0 |  |
| <u>CPN1</u>       | 2 | 2 | 0 |  |
| <u>CR2</u>        | 2 | 2 | 0 |  |
| <u>CRABP1</u>     | 2 | 2 | 0 |  |
| <u>CRB1</u>       | 2 | 2 | 0 |  |
| <u>CRCP</u>       | 2 | 2 | 0 |  |
| <u>CREB3L1</u>    | 2 | 2 | 0 |  |
| <u>CRLF1</u>      | 2 | 2 | 0 |  |
| <u>CRLF3</u>      | 2 | 0 | 2 |  |
| <u>CRX</u>        | 2 | 2 | 0 |  |
| <u>CRYBB1</u>     | 2 | 2 | 0 |  |
| <u>CRYBB2</u>     | 2 | 2 | 0 |  |
| <u>CRYZL1</u>     | 2 | 0 | 2 |  |
| <u>CS</u>         | 2 | 0 | 2 |  |
| <u>CSF1</u>       | 2 | 2 | 0 |  |
| <u>CSF1R</u>      | 2 | 2 | 0 |  |
| <u>CSF2RB</u>     | 2 | 2 | 0 |  |
| <u>CSGALNACT1</u> | 2 | 0 | 2 |  |
| <u>CSGALNACT2</u> | 2 | 0 | 2 |  |
| <u>CSN3</u>       | 2 | 2 | 0 |  |

|                 |   |   |   |  |
|-----------------|---|---|---|--|
| <u>CSNK1A1</u>  | 2 | 0 | 2 |  |
| <u>CSNK2B</u>   | 2 | 0 | 2 |  |
| <u>CSRNP3</u>   | 2 | 2 | 0 |  |
| <u>CSRP1</u>    | 2 | 2 | 0 |  |
| <u>CST5</u>     | 2 | 2 | 0 |  |
| <u>CST6</u>     | 2 | 0 | 2 |  |
| <u>CTBP2</u>    | 2 | 2 | 0 |  |
| <u>CTNNA1</u>   | 2 | 2 | 0 |  |
| <u>CTNNBIP1</u> | 2 | 2 | 0 |  |
| <u>CTNNBL1</u>  | 2 | 0 | 2 |  |
| <u>CTNS</u>     | 2 | 2 | 0 |  |
| <u>CTSH</u>     | 2 | 2 | 0 |  |
| <u>CTSL1</u>    | 2 | 0 | 2 |  |
| <u>CUTC</u>     | 2 | 0 | 2 |  |
| <u>CXCL10</u>   | 2 | 2 | 0 |  |
| <u>CXCL11</u>   | 2 | 2 | 0 |  |
| <u>CXCL14</u>   | 2 | 0 | 2 |  |
| <u>CXCL9</u>    | 2 | 0 | 2 |  |
| <u>CXCR4</u>    | 2 | 2 | 0 |  |
| <u>CXCR7</u>    | 2 | 0 | 2 |  |
| <u>CXORF27</u>  | 2 | 2 | 0 |  |
| <u>CXORF40A</u> | 2 | 0 | 2 |  |
| <u>CXORF40B</u> | 2 | 0 | 2 |  |
| <u>CXORF57</u>  | 2 | 2 | 0 |  |
| <u>CYFIP1</u>   | 2 | 0 | 2 |  |
| <u>CYP1A1</u>   | 2 | 0 | 2 |  |
| <u>CYP2B7P1</u> | 2 | 0 | 2 |  |
| <u>CYP39A1</u>  | 2 | 2 | 0 |  |
| <u>CYP3A43</u>  | 2 | 2 | 0 |  |
| <u>CYP4A11</u>  | 2 | 2 | 0 |  |
| <u>CYP4F3</u>   | 2 | 2 | 0 |  |
| <u>CYP4F8</u>   | 2 | 2 | 0 |  |
| <u>CYTIP</u>    | 2 | 2 | 0 |  |
| <u>DAAM1</u>    | 2 | 2 | 0 |  |
| <u>DAB1</u>     | 2 | 2 | 0 |  |
| <u>DAD1</u>     | 2 | 2 | 0 |  |
| <u>DALRD3</u>   | 2 | 0 | 2 |  |
| <u>DAPK1</u>    | 2 | 2 | 0 |  |
| <u>DAXX</u>     | 2 | 0 | 2 |  |
| <u>DBF4</u>     | 2 | 0 | 2 |  |
| <u>DBF4B</u>    | 2 | 2 | 0 |  |
| <u>DBNDD1</u>   | 2 | 2 | 0 |  |
| <u>DBR1</u>     | 2 | 2 | 0 |  |
| <u>DCAF11</u>   | 2 | 2 | 0 |  |
| <u>DCAF4</u>    | 2 | 2 | 0 |  |
| <u>DCAKD</u>    | 2 | 2 | 0 |  |
| <u>DCHS1</u>    | 2 | 2 | 0 |  |
| <u>DCLK1</u>    | 2 | 2 | 0 |  |

|                 |   |   |   |  |
|-----------------|---|---|---|--|
| <u>DCTN1</u>    | 2 | 2 | 0 |  |
| <u>DCTN3</u>    | 2 | 2 | 0 |  |
| <u>DCTPP1</u>   | 2 | 2 | 0 |  |
| <u>DDB2</u>     | 2 | 0 | 2 |  |
| <u>DDC</u>      | 2 | 2 | 0 |  |
| <u>DDI2</u>     | 2 | 2 | 0 |  |
| <u>DDIT3</u>    | 2 | 0 | 2 |  |
| <u>DDR1</u>     | 2 | 2 | 0 |  |
| <u>DDX17</u>    | 2 | 2 | 0 |  |
| <u>DDX18</u>    | 2 | 0 | 2 |  |
| <u>DDX39A</u>   | 2 | 0 | 2 |  |
| <u>DDX4</u>     | 2 | 2 | 0 |  |
| <u>DDX50</u>    | 2 | 0 | 2 |  |
| <u>DDX56</u>    | 2 | 0 | 2 |  |
| <u>DECR1</u>    | 2 | 0 | 2 |  |
| <u>DEFA5</u>    | 2 | 2 | 0 |  |
| <u>DEFA6</u>    | 2 | 2 | 0 |  |
| <u>DENND1B</u>  | 2 | 2 | 0 |  |
| <u>DENND1C</u>  | 2 | 2 | 0 |  |
| <u>DEPDC1</u>   | 2 | 2 | 0 |  |
| <u>DFNA5</u>    | 2 | 2 | 0 |  |
| <u>DGCR2</u>    | 2 | 2 | 0 |  |
| <u>DGKE</u>     | 2 | 2 | 0 |  |
| <u>DHDDS</u>    | 2 | 0 | 2 |  |
| <u>DHODH</u>    | 2 | 2 | 0 |  |
| <u>DHRS9</u>    | 2 | 0 | 2 |  |
| <u>DHX35</u>    | 2 | 2 | 0 |  |
| <u>DIABLO</u>   | 2 | 0 | 2 |  |
| <u>DIAPH3</u>   | 2 | 2 | 0 |  |
| <u>DIMT1</u>    | 2 | 2 | 0 |  |
| <u>DKC1</u>     | 2 | 0 | 2 |  |
| DKFZP547G183    | 2 | 2 | 0 |  |
| DKFZP686O1327   | 2 | 2 | 0 |  |
| <u>DKK2</u>     | 2 | 2 | 0 |  |
| <u>DLG3</u>     | 2 | 2 | 0 |  |
| <u>DLGAP1</u>   | 2 | 2 | 0 |  |
| <u>DLK1</u>     | 2 | 2 | 0 |  |
| <u>DLX4</u>     | 2 | 2 | 0 |  |
| <u>DMPK</u>     | 2 | 2 | 0 |  |
| <u>DMXL2</u>    | 2 | 2 | 0 |  |
| <u>DNAAF1</u>   | 2 | 2 | 0 |  |
| <u>DNAH2</u>    | 2 | 2 | 0 |  |
| <u>DNAH3</u>    | 2 | 2 | 0 |  |
| <u>DNAI1</u>    | 2 | 2 | 0 |  |
| <u>DNAJA3</u>   | 2 | 0 | 2 |  |
| <u>DNAJC28</u>  | 2 | 2 | 0 |  |
| <u>DNAJC9</u>   | 2 | 0 | 2 |  |
| <u>DNASE1L1</u> | 2 | 0 | 2 |  |

|                 |   |   |   |  |
|-----------------|---|---|---|--|
| <u>DNMT3A</u>   | 2 | 2 | 0 |  |
| DNTT            | 2 | 2 | 0 |  |
| <u>DOCK9</u>    | 2 | 2 | 0 |  |
| <u>DOHH</u>     | 2 | 2 | 0 |  |
| <u>DOPEY1</u>   | 2 | 2 | 0 |  |
| <u>DOPEY2</u>   | 2 | 2 | 0 |  |
| <u>DOT1L</u>    | 2 | 2 | 0 |  |
| <u>DPH2</u>     | 2 | 0 | 2 |  |
| <u>DPM1</u>     | 2 | 0 | 2 |  |
| <u>DPP4</u>     | 2 | 2 | 0 |  |
| <u>DPPA4</u>    | 2 | 2 | 0 |  |
| <u>DPYSL4</u>   | 2 | 2 | 0 |  |
| <u>DRD1</u>     | 2 | 2 | 0 |  |
| <u>DRD4</u>     | 2 | 2 | 0 |  |
| <u>DRD5</u>     | 2 | 2 | 0 |  |
| <u>DRG1</u>     | 2 | 0 | 2 |  |
| DSCR3           | 2 | 2 | 0 |  |
| <u>DSCR6</u>    | 2 | 2 | 0 |  |
| <u>DSN1</u>     | 2 | 0 | 2 |  |
| DSTYK           | 2 | 2 | 0 |  |
| <u>DTNA</u>     | 2 | 2 | 0 |  |
| <u>DTNB</u>     | 2 | 2 | 0 |  |
| DTX2P1          | 2 | 2 | 0 |  |
| <u>DUSP11</u>   | 2 | 2 | 0 |  |
| <u>DUSP12</u>   | 2 | 0 | 2 |  |
| <u>DUSP21</u>   | 2 | 2 | 0 |  |
| DUX2            | 2 | 2 | 0 |  |
| <u>DYM</u>      | 2 | 2 | 0 |  |
| <u>DYNC2H1</u>  | 2 | 2 | 0 |  |
| <u>DYNC2LI1</u> | 2 | 0 | 2 |  |
| <u>DYRK1A</u>   | 2 | 2 | 0 |  |
| <u>DYSE</u>     | 2 | 2 | 0 |  |
| <u>E2F1</u>     | 2 | 2 | 0 |  |
| <u>EAPP</u>     | 2 | 0 | 2 |  |
| <u>EBI3</u>     | 2 | 2 | 0 |  |
| <u>ECI2</u>     | 2 | 0 | 2 |  |
| <u>EDA</u>      | 2 | 2 | 0 |  |
| <u>EDDM3A</u>   | 2 | 2 | 0 |  |
| <u>EDN2</u>     | 2 | 2 | 0 |  |
| <u>EEF1A1</u>   | 2 | 0 | 2 |  |
| <u>EEF1G</u>    | 2 | 0 | 2 |  |
| <u>EFNA5</u>    | 2 | 2 | 0 |  |
| <u>EGR4</u>     | 2 | 2 | 0 |  |
| <u>EHD3</u>     | 2 | 0 | 2 |  |
| <u>EHMT1</u>    | 2 | 2 | 0 |  |
| <u>EHMT2</u>    | 2 | 0 | 2 |  |
| <u>EI24</u>     | 2 | 2 | 0 |  |
| <u>EIF2AK3</u>  | 2 | 2 | 0 |  |

|                 |   |   |   |  |
|-----------------|---|---|---|--|
| <u>EIF2B1</u>   | 2 | 0 | 2 |  |
| <u>EIF2S2</u>   | 2 | 0 | 2 |  |
| <u>ELAC1</u>    | 2 | 2 | 0 |  |
| <u>ELAVL4</u>   | 2 | 2 | 0 |  |
| <u>ELL</u>      | 2 | 2 | 0 |  |
| <u>ELOVL5</u>   | 2 | 2 | 0 |  |
| <u>ELP4</u>     | 2 | 2 | 0 |  |
| <u>EMCN</u>     | 2 | 2 | 0 |  |
| <u>EMILIN1</u>  | 2 | 2 | 0 |  |
| <u>EML2</u>     | 2 | 2 | 0 |  |
| <u>EMP3</u>     | 2 | 0 | 2 |  |
| <u>EMR2</u>     | 2 | 2 | 0 |  |
| <u>EMR3</u>     | 2 | 2 | 0 |  |
| <u>EN1</u>      | 2 | 2 | 0 |  |
| <u>ENPP2</u>    | 2 | 0 | 2 |  |
| <u>ENY2</u>     | 2 | 0 | 2 |  |
| <u>EOGT</u>     | 2 | 0 | 2 |  |
| <u>EPAS1</u>    | 2 | 2 | 0 |  |
| <u>EPB41</u>    | 2 | 2 | 0 |  |
| <u>EPB41L4A</u> | 2 | 2 | 0 |  |
| <u>EPHA1</u>    | 2 | 2 | 0 |  |
| <u>EPHA3</u>    | 2 | 2 | 0 |  |
| <u>EPHB1</u>    | 2 | 2 | 0 |  |
| <u>EPHB4</u>    | 2 | 2 | 0 |  |
| <u>EPHX2</u>    | 2 | 2 | 0 |  |
| <u>EPOR</u>     | 2 | 2 | 0 |  |
| <u>EPRS</u>     | 2 | 0 | 2 |  |
| <u>ERAL1</u>    | 2 | 2 | 0 |  |
| <u>ERAP1</u>    | 2 | 2 | 0 |  |
| <u>ERBB3</u>    | 2 | 2 | 0 |  |
| <u>ERCC6L</u>   | 2 | 2 | 0 |  |
| <u>ERMP1</u>    | 2 | 2 | 0 |  |
| <u>ERO1L</u>    | 2 | 0 | 2 |  |
| <u>ESR2</u>     | 2 | 2 | 0 |  |
| <u>ESRRA</u>    | 2 | 2 | 0 |  |
| <u>ESYT1</u>    | 2 | 0 | 2 |  |
| <u>ETFB</u>     | 2 | 2 | 0 |  |
| <u>ETFDH</u>    | 2 | 0 | 2 |  |
| <u>ETNK1</u>    | 2 | 2 | 0 |  |
| <u>ETS1</u>     | 2 | 2 | 0 |  |
| <u>ETV6</u>     | 2 | 2 | 0 |  |
| <u>ETV7</u>     | 2 | 2 | 0 |  |
| <u>EVC</u>      | 2 | 2 | 0 |  |
| <u>EWSR1</u>    | 2 | 2 | 0 |  |
| <u>EXOC1</u>    | 2 | 0 | 2 |  |
| <u>EXOSC10</u>  | 2 | 0 | 2 |  |
| <u>EXOSC2</u>   | 2 | 2 | 0 |  |
| <u>EXT2</u>     | 2 | 2 | 0 |  |

|                 |   |   |   |  |
|-----------------|---|---|---|--|
| <u>EYA3</u>     | 2 | 2 | 0 |  |
| <u>EZH1</u>     | 2 | 2 | 0 |  |
| <u>F12</u>      | 2 | 2 | 0 |  |
| <u>F8</u>       | 2 | 0 | 2 |  |
| <u>F9</u>       | 2 | 0 | 2 |  |
| <u>FABP3</u>    | 2 | 0 | 2 |  |
| <u>FABP7</u>    | 2 | 2 | 0 |  |
| <u>FAM105A</u>  | 2 | 2 | 0 |  |
| <u>FAM111A</u>  | 2 | 0 | 2 |  |
| <u>FAM118A</u>  | 2 | 2 | 0 |  |
| <u>FAM120A</u>  | 2 | 2 | 0 |  |
| <u>FAM13A</u>   | 2 | 2 | 0 |  |
| <u>FAM13B</u>   | 2 | 2 | 0 |  |
| <u>FAM149A</u>  | 2 | 2 | 0 |  |
| <u>FAM153A</u>  | 2 | 2 | 0 |  |
| <u>FAM155A</u>  | 2 | 2 | 0 |  |
| <u>FAM164C</u>  | 2 | 2 | 0 |  |
| <u>FAM189A1</u> | 2 | 2 | 0 |  |
| <u>FAM18B1</u>  | 2 | 0 | 2 |  |
| <u>FAM193B</u>  | 2 | 2 | 0 |  |
| <u>FAM198B</u>  | 2 | 2 | 0 |  |
| <u>FAM204A</u>  | 2 | 2 | 0 |  |
| <u>FAM208B</u>  | 2 | 0 | 2 |  |
| <u>FAM48A</u>   | 2 | 2 | 0 |  |
| <u>FAM49A</u>   | 2 | 2 | 0 |  |
| <u>FAM49B</u>   | 2 | 2 | 0 |  |
| <u>FAM60A</u>   | 2 | 0 | 2 |  |
| <u>FAM63B</u>   | 2 | 2 | 0 |  |
| <u>FAM90A1</u>  | 2 | 2 | 0 |  |
| <u>FANCA</u>    | 2 | 2 | 0 |  |
| <u>FAP</u>      | 2 | 2 | 0 |  |
| <u>FAS</u>      | 2 | 0 | 2 |  |
| <u>FAT1</u>     | 2 | 0 | 2 |  |
| <u>FBL</u>      | 2 | 2 | 0 |  |
| <u>FBLN1</u>    | 2 | 2 | 0 |  |
| <u>FBXL14</u>   | 2 | 0 | 2 |  |
| <u>FBXL2</u>    | 2 | 2 | 0 |  |
| <u>FBXL6</u>    | 2 | 2 | 0 |  |
| <u>FBXL8</u>    | 2 | 2 | 0 |  |
| <u>FBXO11</u>   | 2 | 0 | 2 |  |
| <u>FBXO21</u>   | 2 | 2 | 0 |  |
| <u>FBXO34</u>   | 2 | 0 | 2 |  |
| <u>FBXO40</u>   | 2 | 2 | 0 |  |
| <u>FBXO41</u>   | 2 | 2 | 0 |  |
| <u>FBXO46</u>   | 2 | 2 | 0 |  |
| <u>FBXO9</u>    | 2 | 0 | 2 |  |
| <u>FCAR</u>     | 2 | 2 | 0 |  |
| <u>FCGRT</u>    | 2 | 2 | 0 |  |

|                 |   |   |   |  |
|-----------------|---|---|---|--|
| <u>FCHO1</u>    | 2 | 0 | 2 |  |
| <u>FDX1</u>     | 2 | 0 | 2 |  |
| <u>FER</u>      | 2 | 2 | 0 |  |
| <u>FFAR2</u>    | 2 | 2 | 0 |  |
| <u>FGB</u>      | 2 | 2 | 0 |  |
| <u>FGD2</u>     | 2 | 2 | 0 |  |
| <u>FGF13</u>    | 2 | 0 | 2 |  |
| <u>FGF14</u>    | 2 | 2 | 0 |  |
| <u>FGF18</u>    | 2 | 2 | 0 |  |
| <u>FGF22</u>    | 2 | 2 | 0 |  |
| <u>FGF9</u>     | 2 | 2 | 0 |  |
| <u>FGFR4</u>    | 2 | 2 | 0 |  |
| <u>FHL1</u>     | 2 | 0 | 2 |  |
| <u>FHL2</u>     | 2 | 2 | 0 |  |
| <u>FKBP10</u>   | 2 | 2 | 0 |  |
| <u>FKBP4</u>    | 2 | 2 | 0 |  |
| <u>FKBP6</u>    | 2 | 2 | 0 |  |
| <u>FKSG2</u>    | 2 | 2 | 0 |  |
| <u>FKTN</u>     | 2 | 0 | 2 |  |
| <u>FLAD1</u>    | 2 | 0 | 2 |  |
| <u>FLJ11292</u> | 2 | 2 | 0 |  |
| <u>FLJ13224</u> | 2 | 2 | 0 |  |
| <u>FLJ22184</u> | 2 | 2 | 0 |  |
| <u>FLNB</u>     | 2 | 0 | 2 |  |
| <u>FLOT2</u>    | 2 | 2 | 0 |  |
| <u>FLT4</u>     | 2 | 2 | 0 |  |
| <u>FLVCR2</u>   | 2 | 0 | 2 |  |
| <u>FN1</u>      | 2 | 2 | 0 |  |
| <u>FOLR1</u>    | 2 | 0 | 2 |  |
| <u>FOSB</u>     | 2 | 0 | 2 |  |
| <u>FOXA2</u>    | 2 | 2 | 0 |  |
| <u>FOXD1</u>    | 2 | 2 | 0 |  |
| <u>FOXE1</u>    | 2 | 2 | 0 |  |
| <u>FOXH1</u>    | 2 | 2 | 0 |  |
| <u>FOXO1</u>    | 2 | 0 | 2 |  |
| <u>FOXO3</u>    | 2 | 0 | 2 |  |
| <u>FPR2</u>     | 2 | 2 | 0 |  |
| <u>FRMD4B</u>   | 2 | 2 | 0 |  |
| <u>FRMD8</u>    | 2 | 2 | 0 |  |
| <u>FRS2</u>     | 2 | 2 | 0 |  |
| <u>FSCN3</u>    | 2 | 2 | 0 |  |
| <u>FSD1</u>     | 2 | 2 | 0 |  |
| <u>FSTL4</u>    | 2 | 2 | 0 |  |
| <u>FTO</u>      | 2 | 0 | 2 |  |
| <u>FTSJ1</u>    | 2 | 2 | 0 |  |
| <u>FUT2</u>     | 2 | 2 | 0 |  |
| <u>FUT6</u>     | 2 | 2 | 0 |  |
| <u>FUT8</u>     | 2 | 2 | 0 |  |

|                |   |   |   |  |
|----------------|---|---|---|--|
| <u>FUT9</u>    | 2 | 2 | 0 |  |
| <u>FZD7</u>    | 2 | 0 | 2 |  |
| <u>FZR1</u>    | 2 | 2 | 0 |  |
| <u>G6PC</u>    | 2 | 2 | 0 |  |
| <u>GABRA1</u>  | 2 | 2 | 0 |  |
| <u>GABRA4</u>  | 2 | 2 | 0 |  |
| <u>GABRA5</u>  | 2 | 2 | 0 |  |
| <u>GABRB2</u>  | 2 | 2 | 0 |  |
| <u>GABRG3</u>  | 2 | 2 | 0 |  |
| <u>GAD2</u>    | 2 | 2 | 0 |  |
| <u>GAGE3</u>   | 2 | 2 | 0 |  |
| <u>GALC</u>    | 2 | 2 | 0 |  |
| <u>GALNT10</u> | 2 | 0 | 2 |  |
| <u>GALNT8</u>  | 2 | 2 | 0 |  |
| <u>GAN</u>     | 2 | 2 | 0 |  |
| <u>GAS2L1</u>  | 2 | 2 | 0 |  |
| <u>GATA1</u>   | 2 | 2 | 0 |  |
| <u>GBP1</u>    | 2 | 2 | 0 |  |
| <u>GBX1</u>    | 2 | 2 | 0 |  |
| <u>GCC1</u>    | 2 | 0 | 2 |  |
| <u>GCC2</u>    | 2 | 0 | 2 |  |
| <u>GCKR</u>    | 2 | 2 | 0 |  |
| <u>GCLC</u>    | 2 | 2 | 0 |  |
| <u>GCN1L1</u>  | 2 | 0 | 2 |  |
| <u>GCNT1</u>   | 2 | 0 | 2 |  |
| <u>GCNT2</u>   | 2 | 2 | 0 |  |
| <u>GDAP1</u>   | 2 | 2 | 0 |  |
| <u>GDF3</u>    | 2 | 2 | 0 |  |
| <u>GDF9</u>    | 2 | 2 | 0 |  |
| <u>GDPD3</u>   | 2 | 2 | 0 |  |
| <u>GFOD1</u>   | 2 | 2 | 0 |  |
| <u>GFRA1</u>   | 2 | 2 | 0 |  |
| <u>GFRA3</u>   | 2 | 2 | 0 |  |
| <u>GFRA4</u>   | 2 | 2 | 0 |  |
| <u>GGA2</u>    | 2 | 2 | 0 |  |
| <u>GGA3</u>    | 2 | 2 | 0 |  |
| <u>GGTLC1</u>  | 2 | 2 | 0 |  |
| <u>GHRH</u>    | 2 | 2 | 0 |  |
| <u>GINS1</u>   | 2 | 2 | 0 |  |
| <u>GJA5</u>    | 2 | 2 | 0 |  |
| <u>GJA9</u>    | 2 | 2 | 0 |  |
| <u>GJB3</u>    | 2 | 2 | 0 |  |
| <u>GJB4</u>    | 2 | 2 | 0 |  |
| <u>GK2</u>     | 2 | 2 | 0 |  |
| <u>GLG1</u>    | 2 | 0 | 2 |  |
| <u>GLI1</u>    | 2 | 2 | 0 |  |
| <u>GLI2</u>    | 2 | 2 | 0 |  |
| <u>GLI3</u>    | 2 | 0 | 2 |  |

|                |   |   |   |  |
|----------------|---|---|---|--|
| <u>GLP1R</u>   | 2 | 2 | 0 |  |
| <u>GLP2R</u>   | 2 | 2 | 0 |  |
| <u>GLS</u>     | 2 | 2 | 0 |  |
| <u>GLYR1</u>   | 2 | 2 | 0 |  |
| <u>GMEB1</u>   | 2 | 2 | 0 |  |
| <u>GNAI2</u>   | 2 | 0 | 2 |  |
| <u>GNAT1</u>   | 2 | 2 | 0 |  |
| <u>GNG10</u>   | 2 | 2 | 0 |  |
| <u>GNG4</u>    | 2 | 2 | 0 |  |
| <u>GNRH2</u>   | 2 | 2 | 0 |  |
| <u>GOLGA5</u>  | 2 | 0 | 2 |  |
| <u>GOLPH3</u>  | 2 | 2 | 0 |  |
| <u>GON4L</u>   | 2 | 2 | 0 |  |
| <u>GOT1</u>    | 2 | 0 | 2 |  |
| <u>GP9</u>     | 2 | 2 | 0 |  |
| <u>GPBP1L1</u> | 2 | 0 | 2 |  |
| <u>GPR126</u>  | 2 | 0 | 2 |  |
| <u>GPR137B</u> | 2 | 0 | 2 |  |
| <u>GPR143</u>  | 2 | 0 | 2 |  |
| <u>GPR161</u>  | 2 | 2 | 0 |  |
| <u>GPR182</u>  | 2 | 2 | 0 |  |
| <u>GPR32</u>   | 2 | 2 | 0 |  |
| <u>GPR35</u>   | 2 | 2 | 0 |  |
| <u>GPR6</u>    | 2 | 2 | 0 |  |
| <u>GPSM3</u>   | 2 | 2 | 0 |  |
| <u>GRAMD3</u>  | 2 | 0 | 2 |  |
| <u>GRAP</u>    | 2 | 2 | 0 |  |
| <u>GRB14</u>   | 2 | 0 | 2 |  |
| <u>GREB1L</u>  | 2 | 2 | 0 |  |
| <u>GRIA2</u>   | 2 | 2 | 0 |  |
| <u>GRID2</u>   | 2 | 2 | 0 |  |
| <u>GRIK4</u>   | 2 | 2 | 0 |  |
| <u>GRIN1</u>   | 2 | 2 | 0 |  |
| <u>GRIN2C</u>  | 2 | 2 | 0 |  |
| <u>GRN</u>     | 2 | 0 | 2 |  |
| <u>GRPR</u>    | 2 | 2 | 0 |  |
| <u>GSPT1</u>   | 2 | 2 | 0 |  |
| <u>GSPT2</u>   | 2 | 2 | 0 |  |
| <u>GSS</u>     | 2 | 0 | 2 |  |
| <u>GSTT1</u>   | 2 | 2 | 0 |  |
| <u>GTF2H4</u>  | 2 | 2 | 0 |  |
| <u>GTPBP10</u> | 2 | 2 | 0 |  |
| <u>GTSE1</u>   | 2 | 0 | 2 |  |
| <u>GUCA1B</u>  | 2 | 2 | 0 |  |
| <u>GULP1</u>   | 2 | 2 | 0 |  |
| <u>H2AFY</u>   | 2 | 2 | 0 |  |
| <u>H6PD</u>    | 2 | 2 | 0 |  |
| <u>HADHB</u>   | 2 | 0 | 2 |  |

|                  |   |   |   |  |
|------------------|---|---|---|--|
| <u>HAPLN1</u>    | 2 | 2 | 0 |  |
| <u>HAT1</u>      | 2 | 0 | 2 |  |
| <u>HAUS7</u>     | 2 | 0 | 2 |  |
| <u>HAX1</u>      | 2 | 0 | 2 |  |
| <u>HBE1</u>      | 2 | 2 | 0 |  |
| <u>HBEGF</u>     | 2 | 2 | 0 |  |
| <u>HBP1</u>      | 2 | 2 | 0 |  |
| <u>HBXIP</u>     | 2 | 2 | 0 |  |
| <u>HCFC1R1</u>   | 2 | 2 | 0 |  |
| <u>HCFC2</u>     | 2 | 2 | 0 |  |
| <u>HCG26</u>     | 2 | 2 | 0 |  |
| <u>HCN2</u>      | 2 | 2 | 0 |  |
| <u>HDAC3</u>     | 2 | 0 | 2 |  |
| <u>HDAC6</u>     | 2 | 2 | 0 |  |
| <u>HDAC7</u>     | 2 | 0 | 2 |  |
| <u>HEATR2</u>    | 2 | 2 | 0 |  |
| <u>HEATR3</u>    | 2 | 0 | 2 |  |
| <u>HEBP2</u>     | 2 | 2 | 0 |  |
| <u>HECA</u>      | 2 | 0 | 2 |  |
| <u>HERC3</u>     | 2 | 2 | 0 |  |
| <u>HERC4</u>     | 2 | 2 | 0 |  |
| <u>HEXA</u>      | 2 | 2 | 0 |  |
| <u>HGF</u>       | 2 | 2 | 0 |  |
| <u>HGFAC</u>     | 2 | 2 | 0 |  |
| <u>HHLA1</u>     | 2 | 2 | 0 |  |
| <u>HIP1R</u>     | 2 | 0 | 2 |  |
| <u>HIPK3</u>     | 2 | 2 | 0 |  |
| <u>HIST1H1B</u>  | 2 | 2 | 0 |  |
| <u>HIST1H1T</u>  | 2 | 2 | 0 |  |
| <u>HIST1H2AE</u> | 2 | 2 | 0 |  |
| <u>HIST1H2BB</u> | 2 | 2 | 0 |  |
| <u>HIST1H2BG</u> | 2 | 2 | 0 |  |
| <u>HIST1H2BL</u> | 2 | 2 | 0 |  |
| <u>HIST1H2BM</u> | 2 | 2 | 0 |  |
| <u>HIST1H2BN</u> | 2 | 2 | 0 |  |
| <u>HIST1H2BQ</u> | 2 | 2 | 0 |  |
| <u>HIST1H3A</u>  | 2 | 2 | 0 |  |
| <u>HIST1H3B</u>  | 2 | 2 | 0 |  |
| <u>HIST1H3E</u>  | 2 | 2 | 0 |  |
| <u>HIST1H3I</u>  | 2 | 2 | 0 |  |
| <u>HIST1H4A</u>  | 2 | 2 | 0 |  |
| <u>HIST1H4F</u>  | 2 | 2 | 0 |  |
| <u>HIST2H2BE</u> | 2 | 2 | 0 |  |
| <u>HIVEP1</u>    | 2 | 2 | 0 |  |
| <u>HKDC1</u>     | 2 | 2 | 0 |  |
| <u>HLA-A</u>     | 2 | 0 | 2 |  |
| <u>HLA-B</u>     | 2 | 0 | 2 |  |
| <u>HLA-DOA</u>   | 2 | 2 | 0 |  |

|                 |   |   |   |  |
|-----------------|---|---|---|--|
| <u>HLA-DOB</u>  | 2 | 0 | 2 |  |
| <u>HLA-DQB1</u> | 2 | 2 | 0 |  |
| <u>HLF</u>      | 2 | 2 | 0 |  |
| <u>HMG20B</u>   | 2 | 2 | 0 |  |
| <u>HMGA1</u>    | 2 | 2 | 0 |  |
| <u>HMGCL</u>    | 2 | 2 | 0 |  |
| <u>HMGN1</u>    | 2 | 0 | 2 |  |
| <u>HMGN4</u>    | 2 | 0 | 2 |  |
| <u>HMHB1</u>    | 2 | 2 | 0 |  |
| <u>HMOX1</u>    | 2 | 2 | 0 |  |
| <u>HMX1</u>     | 2 | 2 | 0 |  |
| <u>HNF1A</u>    | 2 | 2 | 0 |  |
| <u>HNF1B</u>    | 2 | 2 | 0 |  |
| <u>HNF4A</u>    | 2 | 2 | 0 |  |
| <u>HNRNPD</u>   | 2 | 2 | 0 |  |
| <u>HNRNPF</u>   | 2 | 2 | 0 |  |
| <u>HNRNPH2</u>  | 2 | 0 | 2 |  |
| <u>HNRNPH3</u>  | 2 | 0 | 2 |  |
| <u>HOPX</u>     | 2 | 2 | 0 |  |
| <u>HOXA1</u>    | 2 | 2 | 0 |  |
| <u>HOXA11</u>   | 2 | 2 | 0 |  |
| <u>HOXA2</u>    | 2 | 2 | 0 |  |
| <u>HOXA6</u>    | 2 | 2 | 0 |  |
| <u>HOXB6</u>    | 2 | 2 | 0 |  |
| <u>HOXB9</u>    | 2 | 2 | 0 |  |
| <u>HOXC10</u>   | 2 | 0 | 2 |  |
| <u>HOXC6</u>    | 2 | 0 | 2 |  |
| <u>HOXD12</u>   | 2 | 2 | 0 |  |
| <u>HOXD3</u>    | 2 | 2 | 0 |  |
| <u>HPCAL4</u>   | 2 | 2 | 0 |  |
| <u>HPRT1</u>    | 2 | 0 | 2 |  |
| <u>HPS6</u>     | 2 | 2 | 0 |  |
| <u>HRH3</u>     | 2 | 2 | 0 |  |
| <u>HSBP1</u>    | 2 | 0 | 2 |  |
| <u>HSD11B1</u>  | 2 | 2 | 0 |  |
| <u>HSD17B10</u> | 2 | 0 | 2 |  |
| <u>HSD17B7</u>  | 2 | 2 | 0 |  |
| <u>HSD3B1</u>   | 2 | 2 | 0 |  |
| <u>HSF1</u>     | 2 | 2 | 0 |  |
| <u>HSP90AB1</u> | 2 | 0 | 2 |  |
| <u>HSPA12A</u>  | 2 | 2 | 0 |  |
| <u>HSPA14</u>   | 2 | 0 | 2 |  |
| <u>HSPA4</u>    | 2 | 2 | 0 |  |
| <u>HSPA5</u>    | 2 | 0 | 2 |  |
| <u>HSPB2</u>    | 2 | 0 | 2 |  |
| <u>HSPG2</u>    | 2 | 2 | 0 |  |
| <u>HTR2A</u>    | 2 | 2 | 0 |  |
| <u>HTR2B</u>    | 2 | 2 | 0 |  |

|                 |   |   |   |  |
|-----------------|---|---|---|--|
| <u>HTR2C</u>    | 2 | 2 | 0 |  |
| <u>HYOU1</u>    | 2 | 2 | 0 |  |
| <u>IARS</u>     | 2 | 0 | 2 |  |
| <u>ICMT</u>     | 2 | 2 | 0 |  |
| <u>ID4</u>      | 2 | 2 | 0 |  |
| <u>IFI27</u>    | 2 | 0 | 2 |  |
| <u>IFI30</u>    | 2 | 0 | 2 |  |
| <u>IFI44L</u>   | 2 | 2 | 0 |  |
| <u>IFITM2</u>   | 2 | 2 | 0 |  |
| <u>IFNA14</u>   | 2 | 2 | 0 |  |
| <u>IFNA17</u>   | 2 | 2 | 0 |  |
| <u>IFNGR1</u>   | 2 | 0 | 2 |  |
| <u>IGF1</u>     | 2 | 2 | 0 |  |
| <u>IGF1R</u>    | 2 | 2 | 0 |  |
| <u>IGFBP4</u>   | 2 | 2 | 0 |  |
| <u>IGFBP6</u>   | 2 | 2 | 0 |  |
| <u>IGKV1-5</u>  | 2 | 2 | 0 |  |
| <u>IGLV3-19</u> | 2 | 2 | 0 |  |
| <u>IGLV6-57</u> | 2 | 2 | 0 |  |
| <u>IGSF3</u>    | 2 | 2 | 0 |  |
| <u>IKBKB</u>    | 2 | 0 | 2 |  |
| <u>IKBKE</u>    | 2 | 2 | 0 |  |
| <u>IL10RB</u>   | 2 | 2 | 0 |  |
| <u>IL12B</u>    | 2 | 2 | 0 |  |
| <u>IL17RA</u>   | 2 | 2 | 0 |  |
| <u>IL1A</u>     | 2 | 2 | 0 |  |
| <u>IL1B</u>     | 2 | 2 | 0 |  |
| <u>IL1RL1</u>   | 2 | 2 | 0 |  |
| <u>IL1RN</u>    | 2 | 2 | 0 |  |
| <u>IL22</u>     | 2 | 2 | 0 |  |
| <u>IL23A</u>    | 2 | 2 | 0 |  |
| <u>IL26</u>     | 2 | 2 | 0 |  |
| <u>IL2RB</u>    | 2 | 2 | 0 |  |
| <u>IL32</u>     | 2 | 2 | 0 |  |
| <u>IL36G</u>    | 2 | 2 | 0 |  |
| <u>IL4</u>      | 2 | 2 | 0 |  |
| <u>IL5RA</u>    | 2 | 2 | 0 |  |
| <u>IL7</u>      | 2 | 2 | 0 |  |
| <u>IL9</u>      | 2 | 2 | 0 |  |
| <u>IMP4</u>     | 2 | 0 | 2 |  |
| <u>INE1</u>     | 2 | 2 | 0 |  |
| <u>ING3</u>     | 2 | 2 | 0 |  |
| <u>INHBC</u>    | 2 | 2 | 0 |  |
| <u>INPP4A</u>   | 2 | 2 | 0 |  |
| <u>INSL5</u>    | 2 | 2 | 0 |  |
| <u>INTS1</u>    | 2 | 2 | 0 |  |
| <u>INVS</u>     | 2 | 2 | 0 |  |
| <u>IPO13</u>    | 2 | 2 | 0 |  |

|                 |   |   |   |  |
|-----------------|---|---|---|--|
| <u>IPO9</u>     | 2 | 2 | 0 |  |
| <u>IQCA1</u>    | 2 | 2 | 0 |  |
| <u>IOCK</u>     | 2 | 2 | 0 |  |
| <u>IQSEC1</u>   | 2 | 2 | 0 |  |
| <u>IRF4</u>     | 2 | 2 | 0 |  |
| <u>IRF7</u>     | 2 | 2 | 0 |  |
| <u>IRS1</u>     | 2 | 0 | 2 |  |
| <u>IRX5</u>     | 2 | 0 | 2 |  |
| <u>ISG20L2</u>  | 2 | 2 | 0 |  |
| <u>ISLR</u>     | 2 | 2 | 0 |  |
| <u>ITGA10</u>   | 2 | 0 | 2 |  |
| <u>ITGA2B</u>   | 2 | 2 | 0 |  |
| <u>ITGA4</u>    | 2 | 2 | 0 |  |
| <u>ITGA6</u>    | 2 | 0 | 2 |  |
| <u>ITGA9</u>    | 2 | 2 | 0 |  |
| <u>ITGB1</u>    | 2 | 2 | 0 |  |
| <u>ITGB1BP3</u> | 2 | 2 | 0 |  |
| <u>ITGB3BP</u>  | 2 | 0 | 2 |  |
| <u>ITGB4</u>    | 2 | 2 | 0 |  |
| <u>ITIH1</u>    | 2 | 2 | 0 |  |
| <u>ITIH3</u>    | 2 | 2 | 0 |  |
| <u>ITM2A</u>    | 2 | 0 | 2 |  |
| <u>ITM2C</u>    | 2 | 2 | 0 |  |
| <u>IVD</u>      | 2 | 2 | 0 |  |
| <u>JMJD5</u>    | 2 | 2 | 0 |  |
| <u>JPH3</u>     | 2 | 2 | 0 |  |
| <u>JRKL</u>     | 2 | 0 | 2 |  |
| <u>JUP</u>      | 2 | 0 | 2 |  |
| <u>KAT5</u>     | 2 | 2 | 0 |  |
| <u>KAT6A</u>    | 2 | 2 | 0 |  |
| <u>KATNA1</u>   | 2 | 0 | 2 |  |
| <u>KBTBD11</u>  | 2 | 2 | 0 |  |
| <u>KCNA1</u>    | 2 | 2 | 0 |  |
| <u>KCNA2</u>    | 2 | 2 | 0 |  |
| <u>KCNAB1</u>   | 2 | 2 | 0 |  |
| <u>KCND2</u>    | 2 | 2 | 0 |  |
| <u>KCND3</u>    | 2 | 2 | 0 |  |
| <u>KCNE2</u>    | 2 | 2 | 0 |  |
| <u>KCNH2</u>    | 2 | 2 | 0 |  |
| <u>KCNJ1</u>    | 2 | 2 | 0 |  |
| <u>KCNJ2</u>    | 2 | 2 | 0 |  |
| <u>KCNJ3</u>    | 2 | 2 | 0 |  |
| <u>KCNJ4</u>    | 2 | 2 | 0 |  |
| <u>KCNJ5</u>    | 2 | 2 | 0 |  |
| <u>KCNJ6</u>    | 2 | 2 | 0 |  |
| <u>KCNJ9</u>    | 2 | 2 | 0 |  |
| <u>KCNK2</u>    | 2 | 2 | 0 |  |
| <u>KCNMA1</u>   | 2 | 2 | 0 |  |

|                 |   |   |   |  |
|-----------------|---|---|---|--|
| <u>KCNMB2</u>   | 2 | 2 | 0 |  |
| <u>KCNN2</u>    | 2 | 2 | 0 |  |
| <u>KCNV1</u>    | 2 | 2 | 0 |  |
| <u>KCNV2</u>    | 2 | 2 | 0 |  |
| <u>KCTD20</u>   | 2 | 2 | 0 |  |
| <u>KDM1A</u>    | 2 | 2 | 0 |  |
| <u>KDM4C</u>    | 2 | 2 | 0 |  |
| <u>KDM5C</u>    | 2 | 2 | 0 |  |
| <u>KDM6A</u>    | 2 | 2 | 0 |  |
| <u>KDM6B</u>    | 2 | 2 | 0 |  |
| <u>KERA</u>     | 2 | 2 | 0 |  |
| <u>KHDRBS3</u>  | 2 | 2 | 0 |  |
| <u>KHSRP</u>    | 2 | 2 | 0 |  |
| <u>KIAA0100</u> | 2 | 0 | 2 |  |
| <u>KIAA0125</u> | 2 | 0 | 2 |  |
| <u>KIAA0195</u> | 2 | 2 | 0 |  |
| <u>KIAA0196</u> | 2 | 2 | 0 |  |
| <u>KIAA0240</u> | 2 | 0 | 2 |  |
| <u>KIAA0284</u> | 2 | 2 | 0 |  |
| <u>KIAA0586</u> | 2 | 0 | 2 |  |
| <u>KIAA0649</u> | 2 | 0 | 2 |  |
| <u>KIAA0922</u> | 2 | 0 | 2 |  |
| <u>KIAA1033</u> | 2 | 2 | 0 |  |
| <u>KIAA1107</u> | 2 | 2 | 0 |  |
| <u>KIAA1279</u> | 2 | 0 | 2 |  |
| <u>KIAA1614</u> | 2 | 2 | 0 |  |
| <u>KIAA1661</u> | 2 | 2 | 0 |  |
| <u>KIAA1731</u> | 2 | 2 | 0 |  |
| <u>KIAA1751</u> | 2 | 2 | 0 |  |
| <u>KIAA1967</u> | 2 | 2 | 0 |  |
| <u>KIF15</u>    | 2 | 0 | 2 |  |
| <u>KIF20A</u>   | 2 | 2 | 0 |  |
| <u>KIF23</u>    | 2 | 2 | 0 |  |
| <u>KIF26B</u>   | 2 | 2 | 0 |  |
| <u>KIFC1</u>    | 2 | 2 | 0 |  |
| <u>KIR2DL4</u>  | 2 | 2 | 0 |  |
| <u>KIRREL</u>   | 2 | 2 | 0 |  |
| <u>KISS1</u>    | 2 | 2 | 0 |  |
| <u>KL</u>       | 2 | 2 | 0 |  |
| <u>KLHL11</u>   | 2 | 2 | 0 |  |
| <u>KLHL21</u>   | 2 | 0 | 2 |  |
| <u>KLHL24</u>   | 2 | 2 | 0 |  |
| <u>KLHL25</u>   | 2 | 2 | 0 |  |
| <u>KLHL29</u>   | 2 | 2 | 0 |  |
| <u>KLHL4</u>    | 2 | 2 | 0 |  |
| <u>KLK11</u>    | 2 | 2 | 0 |  |
| <u>KLK13</u>    | 2 | 2 | 0 |  |
| <u>KLK15</u>    | 2 | 2 | 0 |  |

|                  |   |   |   |  |
|------------------|---|---|---|--|
| <u>KLK5</u>      | 2 | 2 | 0 |  |
| <u>KLK6</u>      | 2 | 2 | 0 |  |
| <u>KLK8</u>      | 2 | 2 | 0 |  |
| <u>KLRB1</u>     | 2 | 0 | 2 |  |
| <u>KRT38</u>     | 2 | 2 | 0 |  |
| KRT76            | 2 | 2 | 0 |  |
| <u>KRT83</u>     | 2 | 2 | 0 |  |
| KRT85            | 2 | 2 | 0 |  |
| KRTAP5-9         | 2 | 2 | 0 |  |
| <u>KTN1</u>      | 2 | 0 | 2 |  |
| <u>L3MBTL1</u>   | 2 | 2 | 0 |  |
| <u>LAMA1</u>     | 2 | 2 | 0 |  |
| <u>LAMA2</u>     | 2 | 2 | 0 |  |
| <u>LAMB3</u>     | 2 | 0 | 2 |  |
| <u>LAMTOR2</u>   | 2 | 2 | 0 |  |
| <u>LAP3</u>      | 2 | 2 | 0 |  |
| LAPTM4A          | 2 | 0 | 2 |  |
| <u>LARGE</u>     | 2 | 2 | 0 |  |
| <u>LARP1</u>     | 2 | 0 | 2 |  |
| <u>LATS1</u>     | 2 | 2 | 0 |  |
| <u>LBR</u>       | 2 | 0 | 2 |  |
| <u>LDLR</u>      | 2 | 2 | 0 |  |
| <u>LEP</u>       | 2 | 2 | 0 |  |
| <u>LEPREL2</u>   | 2 | 2 | 0 |  |
| <u>LGALS14</u>   | 2 | 2 | 0 |  |
| <u>LGI1</u>      | 2 | 2 | 0 |  |
| <u>LGR5</u>      | 2 | 2 | 0 |  |
| <u>LHCGR</u>     | 2 | 2 | 0 |  |
| <u>LHX1</u>      | 2 | 2 | 0 |  |
| <u>LIFR</u>      | 2 | 2 | 0 |  |
| <u>LILRA2</u>    | 2 | 2 | 0 |  |
| <u>LIMS3</u>     | 2 | 2 | 0 |  |
| <u>LIN37</u>     | 2 | 0 | 2 |  |
| <u>LINC00115</u> | 2 | 2 | 0 |  |
| LINC00474        | 2 | 2 | 0 |  |
| <u>LIPE</u>      | 2 | 2 | 0 |  |
| <u>LMAN1</u>     | 2 | 2 | 0 |  |
| <u>LMF1</u>      | 2 | 2 | 0 |  |
| <u>LMF2</u>      | 2 | 0 | 2 |  |
| <u>LMTK2</u>     | 2 | 2 | 0 |  |
| LOC100093698     | 2 | 2 | 0 |  |
| LOC100129361     | 2 | 0 | 2 |  |
| LOC100129648     | 2 | 2 | 0 |  |
| LOC100130741     | 2 | 2 | 0 |  |
| LOC100131298     | 2 | 2 | 0 |  |
| LOC100272216     | 2 | 0 | 2 |  |
| LOC100288594     | 2 | 2 | 0 |  |
| LOC100507397     | 2 | 2 | 0 |  |

|                 |   |   |   |  |
|-----------------|---|---|---|--|
| LOC100507424    | 2 | 2 | 0 |  |
| LOC220594       | 2 | 0 | 2 |  |
| LOC257152       | 2 | 2 | 0 |  |
| LOC388796       | 2 | 0 | 2 |  |
| LOC440792       | 2 | 2 | 0 |  |
| LOC441204       | 2 | 2 | 0 |  |
| LOC647070       | 2 | 2 | 0 |  |
| <u>LOXL1</u>    | 2 | 2 | 0 |  |
| <u>LPAR3</u>    | 2 | 2 | 0 |  |
| <u>LPHN1</u>    | 2 | 2 | 0 |  |
| <u>LPIN1</u>    | 2 | 2 | 0 |  |
| <u>LRIG2</u>    | 2 | 2 | 0 |  |
| <u>LRP5L</u>    | 2 | 2 | 0 |  |
| <u>LRRC23</u>   | 2 | 2 | 0 |  |
| LRRC36          | 2 | 2 | 0 |  |
| <u>LRRC37A3</u> | 2 | 2 | 0 |  |
| LRRC48          | 2 | 2 | 0 |  |
| <u>LRRC59</u>   | 2 | 0 | 2 |  |
| <u>LRRC8B</u>   | 2 | 2 | 0 |  |
| <u>LRRK1</u>    | 2 | 2 | 0 |  |
| <u>LRRTM2</u>   | 2 | 2 | 0 |  |
| <u>LSM3</u>     | 2 | 0 | 2 |  |
| <u>LSP1</u>     | 2 | 2 | 0 |  |
| <u>LST1</u>     | 2 | 2 | 0 |  |
| <u>LTBP3</u>    | 2 | 0 | 2 |  |
| <u>LTC4S</u>    | 2 | 2 | 0 |  |
| <u>LTN1</u>     | 2 | 2 | 0 |  |
| <u>LY6G6C</u>   | 2 | 2 | 0 |  |
| <u>LY75</u>     | 2 | 0 | 2 |  |
| <u>LY96</u>     | 2 | 2 | 0 |  |
| <u>LYN</u>      | 2 | 0 | 2 |  |
| <u>LYRM2</u>    | 2 | 0 | 2 |  |
| <u>LZTS1</u>    | 2 | 2 | 0 |  |
| <u>MAF</u>      | 2 | 2 | 0 |  |
| <u>MAFG</u>     | 2 | 0 | 2 |  |
| MAG             | 2 | 2 | 0 |  |
| <u>MAGEA4</u>   | 2 | 2 | 0 |  |
| MAGEB1          | 2 | 2 | 0 |  |
| <u>MAGEB4</u>   | 2 | 2 | 0 |  |
| <u>MAGEC2</u>   | 2 | 2 | 0 |  |
| MAGEC3          | 2 | 2 | 0 |  |
| <u>MAGEL2</u>   | 2 | 2 | 0 |  |
| MAGOH2          | 2 | 2 | 0 |  |
| <u>MAK</u>      | 2 | 2 | 0 |  |
| <u>MAN1C1</u>   | 2 | 2 | 0 |  |
| <u>MANEA</u>    | 2 | 2 | 0 |  |
| <u>MAP2K6</u>   | 2 | 2 | 0 |  |
| <u>MAP2K7</u>   | 2 | 2 | 0 |  |

|                 |   |   |   |  |
|-----------------|---|---|---|--|
| <u>MAP3K13</u>  | 2 | 2 | 0 |  |
| <u>MAP3K14</u>  | 2 | 2 | 0 |  |
| <u>MAP3K3</u>   | 2 | 2 | 0 |  |
| <u>MAP4</u>     | 2 | 0 | 2 |  |
| <u>MAP4K2</u>   | 2 | 2 | 0 |  |
| <u>MAP4K3</u>   | 2 | 0 | 2 |  |
| <u>MAP4K4</u>   | 2 | 0 | 2 |  |
| <u>MAP6D1</u>   | 2 | 0 | 2 |  |
| <u>MAP7D3</u>   | 2 | 0 | 2 |  |
| <u>MAPK1</u>    | 2 | 2 | 0 |  |
| <u>MAPK10</u>   | 2 | 2 | 0 |  |
| <u>MAPK11</u>   | 2 | 2 | 0 |  |
| <u>MAPK14</u>   | 2 | 2 | 0 |  |
| <u>MAPK3</u>    | 2 | 2 | 0 |  |
| <u>MAPK4</u>    | 2 | 2 | 0 |  |
| <u>MAPKAPK5</u> | 2 | 0 | 2 |  |
| <u>MAPRE2</u>   | 2 | 2 | 0 |  |
| <u>MAPRE3</u>   | 2 | 2 | 0 |  |
| <u>MARK2</u>    | 2 | 2 | 0 |  |
| <u>MASP2</u>    | 2 | 2 | 0 |  |
| <u>MAT2A</u>    | 2 | 0 | 2 |  |
| <u>MATN2</u>    | 2 | 0 | 2 |  |
| <u>MATN4</u>    | 2 | 2 | 0 |  |
| <u>MBD2</u>     | 2 | 2 | 0 |  |
| <u>MBIP</u>     | 2 | 2 | 0 |  |
| <u>MBNL3</u>    | 2 | 2 | 0 |  |
| <u>MBOAT7</u>   | 2 | 2 | 0 |  |
| <u>MBTD1</u>    | 2 | 2 | 0 |  |
| <u>MBTPS2</u>   | 2 | 2 | 0 |  |
| <u>MC5R</u>     | 2 | 2 | 0 |  |
| <u>MCAM</u>     | 2 | 2 | 0 |  |
| MCF2L-AS1       | 2 | 2 | 0 |  |
| <u>MCHR1</u>    | 2 | 2 | 0 |  |
| <u>MCM2</u>     | 2 | 2 | 0 |  |
| <u>MCM3AP</u>   | 2 | 2 | 0 |  |
| <u>MCM4</u>     | 2 | 2 | 0 |  |
| <u>MCM5</u>     | 2 | 2 | 0 |  |
| <u>MCM6</u>     | 2 | 2 | 0 |  |
| <u>MCM7</u>     | 2 | 2 | 0 |  |
| <u>MDH1</u>     | 2 | 0 | 2 |  |
| <u>MEAF6</u>    | 2 | 2 | 0 |  |
| <u>MECP2</u>    | 2 | 2 | 0 |  |
| <u>MED14</u>    | 2 | 2 | 0 |  |
| <u>MED25</u>    | 2 | 2 | 0 |  |
| <u>MED7</u>     | 2 | 0 | 2 |  |
| MEFV            | 2 | 2 | 0 |  |
| <u>MEGF6</u>    | 2 | 2 | 0 |  |
| <u>MEGF8</u>    | 2 | 2 | 0 |  |

|                 |   |   |   |  |
|-----------------|---|---|---|--|
| <u>MEIS2</u>    | 2 | 2 | 0 |  |
| <u>MEOX1</u>    | 2 | 0 | 2 |  |
| <u>MEP1B</u>    | 2 | 2 | 0 |  |
| <u>METT121D</u> | 2 | 0 | 2 |  |
| <u>MEX3D</u>    | 2 | 2 | 0 |  |
| <u>MFGE8</u>    | 2 | 0 | 2 |  |
| <u>MFNG</u>     | 2 | 2 | 0 |  |
| <u>MGAT4A</u>   | 2 | 2 | 0 |  |
| <u>MGAT4B</u>   | 2 | 0 | 2 |  |
| <u>MGC2752</u>  | 2 | 2 | 0 |  |
| <u>MGST3</u>    | 2 | 0 | 2 |  |
| <u>MICAL1</u>   | 2 | 0 | 2 |  |
| <u>MINA</u>     | 2 | 0 | 2 |  |
| <u>MIOS</u>     | 2 | 2 | 0 |  |
| <u>MIR600HG</u> | 2 | 2 | 0 |  |
| <u>MIR622</u>   | 2 | 2 | 0 |  |
| <u>MIS18A</u>   | 2 | 0 | 2 |  |
| <u>MKI67</u>    | 2 | 2 | 0 |  |
| <u>MKL1</u>     | 2 | 2 | 0 |  |
| <u>MLF1IP</u>   | 2 | 2 | 0 |  |
| <u>MLF2</u>     | 2 | 2 | 0 |  |
| <u>MLL2</u>     | 2 | 2 | 0 |  |
| <u>MLLT1</u>    | 2 | 2 | 0 |  |
| <u>MLLT10</u>   | 2 | 2 | 0 |  |
| <u>MLLT4</u>    | 2 | 2 | 0 |  |
| <u>MLN</u>      | 2 | 2 | 0 |  |
| <u>MLX</u>      | 2 | 0 | 2 |  |
| <u>MMACHC</u>   | 2 | 0 | 2 |  |
| <u>MMP11</u>    | 2 | 2 | 0 |  |
| <u>MNT</u>      | 2 | 2 | 0 |  |
| <u>MOAP1</u>    | 2 | 0 | 2 |  |
| <u>MORN1</u>    | 2 | 2 | 0 |  |
| <u>MOSC1</u>    | 2 | 2 | 0 |  |
| <u>MOSPD3</u>   | 2 | 2 | 0 |  |
| <u>MPHOSPH8</u> | 2 | 0 | 2 |  |
| <u>MPP2</u>     | 2 | 2 | 0 |  |
| <u>MPPE1</u>    | 2 | 0 | 2 |  |
| <u>MRPL19</u>   | 2 | 0 | 2 |  |
| <u>MRPL34</u>   | 2 | 0 | 2 |  |
| <u>MRPL40</u>   | 2 | 0 | 2 |  |
| <u>MRPL48</u>   | 2 | 2 | 0 |  |
| <u>MRPL49</u>   | 2 | 0 | 2 |  |
| <u>MRPS12</u>   | 2 | 2 | 0 |  |
| <u>MRPS14</u>   | 2 | 2 | 0 |  |
| <u>MS4A5</u>    | 2 | 2 | 0 |  |
| <u>MSH6</u>     | 2 | 2 | 0 |  |
| <u>MSR1</u>     | 2 | 2 | 0 |  |
| <u>MSTN</u>     | 2 | 2 | 0 |  |

|                    |   |   |   |  |
|--------------------|---|---|---|--|
| <u>MT3</u>         | 2 | 0 | 2 |  |
| <u>MT4</u>         | 2 | 2 | 0 |  |
| <u>MTAP</u>        | 2 | 2 | 0 |  |
| <u>MTF1</u>        | 2 | 2 | 0 |  |
| <u>MTHFR</u>       | 2 | 2 | 0 |  |
| <u>MTHFS</u>       | 2 | 0 | 2 |  |
| <u>MTL5</u>        | 2 | 2 | 0 |  |
| <u>MTMR9</u>       | 2 | 2 | 0 |  |
| <u>MTPAP</u>       | 2 | 2 | 0 |  |
| <u>MTUS2</u>       | 2 | 2 | 0 |  |
| <u>MUC8</u>        | 2 | 2 | 0 |  |
| <u>MUDENG</u>      | 2 | 0 | 2 |  |
| <u>MUL1</u>        | 2 | 2 | 0 |  |
| <u>MVK</u>         | 2 | 2 | 0 |  |
| <u>MYBL2</u>       | 2 | 2 | 0 |  |
| <u>MYBPC2</u>      | 2 | 2 | 0 |  |
| <u>MYCBP2</u>      | 2 | 0 | 2 |  |
| <u>MYL1</u>        | 2 | 2 | 0 |  |
| <u>MYL12A</u>      | 2 | 0 | 2 |  |
| <u>MYLK</u>        | 2 | 0 | 2 |  |
| <u>MYLK3</u>       | 2 | 0 | 2 |  |
| <u>MYNN</u>        | 2 | 0 | 2 |  |
| <u>MYO10</u>       | 2 | 0 | 2 |  |
| <u>MYO15A</u>      | 2 | 2 | 0 |  |
| <u>MYO5A</u>       | 2 | 2 | 0 |  |
| <u>MYO7A</u>       | 2 | 2 | 0 |  |
| <u>MYOF</u>        | 2 | 2 | 0 |  |
| <u>MYT1</u>        | 2 | 2 | 0 |  |
| <u>N4BP2L1</u>     | 2 | 2 | 0 |  |
| <u>N4BP2L2-IT1</u> | 2 | 2 | 0 |  |
| <u>NAALAD2</u>     | 2 | 2 | 0 |  |
| <u>NAB2</u>        | 2 | 2 | 0 |  |
| <u>NAG18</u>       | 2 | 2 | 0 |  |
| <u>NAGK</u>        | 2 | 0 | 2 |  |
| <u>NAGPA</u>       | 2 | 2 | 0 |  |
| <u>NASP</u>        | 2 | 2 | 0 |  |
| <u>NAT1</u>        | 2 | 0 | 2 |  |
| <u>NAV2</u>        | 2 | 0 | 2 |  |
| <u>NAV3</u>        | 2 | 2 | 0 |  |
| <u>NBEAL2</u>      | 2 | 2 | 0 |  |
| <u>NCAPH2</u>      | 2 | 2 | 0 |  |
| <u>NCF1C</u>       | 2 | 2 | 0 |  |
| <u>NCKAP1L</u>     | 2 | 2 | 0 |  |
| <u>NCOA2</u>       | 2 | 2 | 0 |  |
| <u>NCOR2</u>       | 2 | 2 | 0 |  |
| <u>NDST1</u>       | 2 | 2 | 0 |  |
| <u>NDUFA5</u>      | 2 | 2 | 0 |  |
| <u>NDUFAF1</u>     | 2 | 0 | 2 |  |

|                |   |   |   |  |
|----------------|---|---|---|--|
| <u>NDUFB7</u>  | 2 | 2 | 0 |  |
| <u>NDUFS6</u>  | 2 | 2 | 0 |  |
| <u>NECAB3</u>  | 2 | 2 | 0 |  |
| <u>NECAP1</u>  | 2 | 2 | 0 |  |
| <u>NEFH</u>    | 2 | 2 | 0 |  |
| <u>NEU1</u>    | 2 | 0 | 2 |  |
| <u>NEUROG2</u> | 2 | 2 | 0 |  |
| <u>NEUROG3</u> | 2 | 2 | 0 |  |
| <u>NF1</u>     | 2 | 2 | 0 |  |
| <u>NFATC3</u>  | 2 | 2 | 0 |  |
| <u>NFE2</u>    | 2 | 2 | 0 |  |
| <u>NFKB1</u>   | 2 | 0 | 2 |  |
| <u>NFKB2</u>   | 2 | 2 | 0 |  |
| <u>NFRKB</u>   | 2 | 2 | 0 |  |
| <u>NFU1</u>    | 2 | 0 | 2 |  |
| <u>NGB</u>     | 2 | 2 | 0 |  |
| <u>NHLH2</u>   | 2 | 2 | 0 |  |
| <u>NID1</u>    | 2 | 2 | 0 |  |
| <u>NIPAL2</u>  | 2 | 2 | 0 |  |
| <u>NISCH</u>   | 2 | 0 | 2 |  |
| <u>NKX3-2</u>  | 2 | 2 | 0 |  |
| <u>NLRP1</u>   | 2 | 2 | 0 |  |
| <u>NLRP3</u>   | 2 | 2 | 0 |  |
| <u>NLRX1</u>   | 2 | 2 | 0 |  |
| <u>NMB</u>     | 2 | 0 | 2 |  |
| <u>NME6</u>    | 2 | 2 | 0 |  |
| <u>NMNAT2</u>  | 2 | 2 | 0 |  |
| <u>NOD1</u>    | 2 | 2 | 0 |  |
| <u>NOL7</u>    | 2 | 0 | 2 |  |
| <u>NOP14</u>   | 2 | 0 | 2 |  |
| <u>NOP2</u>    | 2 | 0 | 2 |  |
| <u>NOTCH3</u>  | 2 | 2 | 0 |  |
| <u>NOV</u>     | 2 | 2 | 0 |  |
| <u>NPAS3</u>   | 2 | 2 | 0 |  |
| <u>NPHS1</u>   | 2 | 2 | 0 |  |
| <u>NPIP</u>    | 2 | 0 | 2 |  |
| <u>NPM1</u>    | 2 | 0 | 2 |  |
| <u>NPPA</u>    | 2 | 2 | 0 |  |
| <u>NPR3</u>    | 2 | 0 | 2 |  |
| <u>NPY2R</u>   | 2 | 2 | 0 |  |
| <u>NR0B1</u>   | 2 | 2 | 0 |  |
| <u>NR0B2</u>   | 2 | 2 | 0 |  |
| <u>NR1H2</u>   | 2 | 2 | 0 |  |
| <u>NR2E3</u>   | 2 | 2 | 0 |  |
| <u>NR2F2</u>   | 2 | 2 | 0 |  |
| <u>NR5A1</u>   | 2 | 2 | 0 |  |
| <u>NR6A1</u>   | 2 | 2 | 0 |  |
| <u>NRP1</u>    | 2 | 2 | 0 |  |

|                |   |   |   |  |
|----------------|---|---|---|--|
| <u>NRXN2</u>   | 2 | 2 | 0 |  |
| <u>NRXN3</u>   | 2 | 2 | 0 |  |
| <u>NSA2</u>    | 2 | 0 | 2 |  |
| <u>NSFL1C</u>  | 2 | 2 | 0 |  |
| <u>NSUN5P2</u> | 2 | 0 | 2 |  |
| <u>NTRK2</u>   | 2 | 0 | 2 |  |
| <u>NTSR2</u>   | 2 | 2 | 0 |  |
| <u>NUAK1</u>   | 2 | 2 | 0 |  |
| <u>NUDT1</u>   | 2 | 0 | 2 |  |
| <u>NUDT11</u>  | 2 | 2 | 0 |  |
| <u>NUDT9</u>   | 2 | 0 | 2 |  |
| <u>NUFIP1</u>  | 2 | 2 | 0 |  |
| <u>NUP210</u>  | 2 | 0 | 2 |  |
| <u>NUP37</u>   | 2 | 0 | 2 |  |
| <u>NUP43</u>   | 2 | 0 | 2 |  |
| <u>NUP54</u>   | 2 | 0 | 2 |  |
| <u>NUP62</u>   | 2 | 0 | 2 |  |
| <u>NUPL2</u>   | 2 | 0 | 2 |  |
| <u>NUS1P3</u>  | 2 | 2 | 0 |  |
| <u>NUSAP1</u>  | 2 | 2 | 0 |  |
| <u>OCLN</u>    | 2 | 2 | 0 |  |
| <u>OCM2</u>    | 2 | 2 | 0 |  |
| <u>ODF1</u>    | 2 | 0 | 2 |  |
| <u>ODZ3</u>    | 2 | 2 | 0 |  |
| <u>ODZ4</u>    | 2 | 2 | 0 |  |
| <u>OGG1</u>    | 2 | 2 | 0 |  |
| <u>OGN</u>     | 2 | 2 | 0 |  |
| <u>OGT</u>     | 2 | 2 | 0 |  |
| <u>OLFM1</u>   | 2 | 2 | 0 |  |
| <u>OMP</u>     | 2 | 2 | 0 |  |
| <u>OPN1SW</u>  | 2 | 2 | 0 |  |
| <u>OPRD1</u>   | 2 | 2 | 0 |  |
| <u>OPRL1</u>   | 2 | 2 | 0 |  |
| <u>OPRM1</u>   | 2 | 2 | 0 |  |
| <u>OR1D2</u>   | 2 | 2 | 0 |  |
| <u>OR1F1</u>   | 2 | 2 | 0 |  |
| <u>OR1F2P</u>  | 2 | 2 | 0 |  |
| <u>OR2B6</u>   | 2 | 2 | 0 |  |
| <u>OR2C1</u>   | 2 | 2 | 0 |  |
| <u>OR3A2</u>   | 2 | 2 | 0 |  |
| <u>OR51E2</u>  | 2 | 2 | 0 |  |
| <u>OR7E19P</u> | 2 | 2 | 0 |  |
| <u>OR7E24</u>  | 2 | 2 | 0 |  |
| <u>ORC1</u>    | 2 | 2 | 0 |  |
| <u>OSBPL8</u>  | 2 | 0 | 2 |  |
| <u>OSM</u>     | 2 | 2 | 0 |  |
| <u>OTC</u>     | 2 | 2 | 0 |  |
| <u>OTOF</u>    | 2 | 2 | 0 |  |

|                 |   |   |   |  |
|-----------------|---|---|---|--|
| <u>OTUD7B</u>   | 2 | 2 | 0 |  |
| <u>OVOL1</u>    | 2 | 2 | 0 |  |
| <u>OVOL2</u>    | 2 | 2 | 0 |  |
| <u>P2RX1</u>    | 2 | 2 | 0 |  |
| <u>P2RX2</u>    | 2 | 2 | 0 |  |
| <u>P2RY14</u>   | 2 | 2 | 0 |  |
| <u>PACSIN2</u>  | 2 | 0 | 2 |  |
| <u>PADI1</u>    | 2 | 2 | 0 |  |
| <u>PADI4</u>    | 2 | 2 | 0 |  |
| <u>PAFAH1B2</u> | 2 | 2 | 0 |  |
| <u>PAGE1</u>    | 2 | 2 | 0 |  |
| <u>PALM</u>     | 2 | 2 | 0 |  |
| <u>PAMR1</u>    | 2 | 0 | 2 |  |
| <u>PARG</u>     | 2 | 0 | 2 |  |
| <u>PARP1</u>    | 2 | 2 | 0 |  |
| <u>PARP3</u>    | 2 | 2 | 0 |  |
| <u>PART1</u>    | 2 | 2 | 0 |  |
| <u>PARVB</u>    | 2 | 2 | 0 |  |
| <u>PAX1</u>     | 2 | 2 | 0 |  |
| <u>PBLD</u>     | 2 | 0 | 2 |  |
| <u>PCBD1</u>    | 2 | 2 | 0 |  |
| <u>PCBP1</u>    | 2 | 0 | 2 |  |
| <u>PCCA</u>     | 2 | 2 | 0 |  |
| PCDHA10         | 2 | 2 | 0 |  |
| <u>PCDHB8</u>   | 2 | 2 | 0 |  |
| <u>PCDHGA8</u>  | 2 | 2 | 0 |  |
| PCDHGA9         | 2 | 2 | 0 |  |
| <u>PCDHGC3</u>  | 2 | 2 | 0 |  |
| <u>PCGF2</u>    | 2 | 2 | 0 |  |
| PCNT            | 2 | 2 | 0 |  |
| <u>PCNXL2</u>   | 2 | 2 | 0 |  |
| <u>PCSK1</u>    | 2 | 2 | 0 |  |
| <u>PCSK7</u>    | 2 | 0 | 2 |  |
| <u>PCYOX1</u>   | 2 | 0 | 2 |  |
| <u>PCYOX1L</u>  | 2 | 0 | 2 |  |
| <u>PCYT1A</u>   | 2 | 2 | 0 |  |
| <u>PCYT1B</u>   | 2 | 2 | 0 |  |
| <u>PDCD1LG2</u> | 2 | 2 | 0 |  |
| <u>PDE2A</u>    | 2 | 0 | 2 |  |
| <u>PDE4B</u>    | 2 | 2 | 0 |  |
| <u>PDE6B</u>    | 2 | 2 | 0 |  |
| <u>PDGFRB</u>   | 2 | 2 | 0 |  |
| <u>PDHB</u>     | 2 | 0 | 2 |  |
| <u>PDHX</u>     | 2 | 2 | 0 |  |
| <u>PDIA3</u>    | 2 | 2 | 0 |  |
| <u>PDIA6</u>    | 2 | 2 | 0 |  |
| <u>PDPK1</u>    | 2 | 2 | 0 |  |
| <u>PDYN</u>     | 2 | 2 | 0 |  |

|                |   |   |   |  |
|----------------|---|---|---|--|
| <u>PEX12</u>   | 2 | 0 | 2 |  |
| <u>PEX14</u>   | 2 | 0 | 2 |  |
| <u>PEX2</u>    | 2 | 2 | 0 |  |
| <u>PEX5L</u>   | 2 | 2 | 0 |  |
| <u>PFDN6</u>   | 2 | 2 | 0 |  |
| <u>PGCP</u>    | 2 | 2 | 0 |  |
| <u>PGF</u>     | 2 | 2 | 0 |  |
| <u>PHC2</u>    | 2 | 2 | 0 |  |
| <u>PHEX</u>    | 2 | 2 | 0 |  |
| <u>PHF20</u>   | 2 | 2 | 0 |  |
| <u>PHF3</u>    | 2 | 2 | 0 |  |
| <u>PHIP</u>    | 2 | 2 | 0 |  |
| <u>PHLDA1</u>  | 2 | 2 | 0 |  |
| <u>PHLDB1</u>  | 2 | 2 | 0 |  |
| <u>PHLPP1</u>  | 2 | 2 | 0 |  |
| <u>PHLPP2</u>  | 2 | 2 | 0 |  |
| <u>PI4K2A</u>  | 2 | 2 | 0 |  |
| <u>PIAS2</u>   | 2 | 2 | 0 |  |
| <u>PIGG</u>    | 2 | 0 | 2 |  |
| <u>PIGZ</u>    | 2 | 2 | 0 |  |
| <u>PIK3CD</u>  | 2 | 2 | 0 |  |
| <u>PIK3R2</u>  | 2 | 2 | 0 |  |
| <u>PIM1</u>    | 2 | 0 | 2 |  |
| <u>PIN1P1</u>  | 2 | 2 | 0 |  |
| <u>PION</u>    | 2 | 2 | 0 |  |
| <u>PIP5K1B</u> | 2 | 2 | 0 |  |
| <u>PITX3</u>   | 2 | 2 | 0 |  |
| <u>PKD1P1</u>  | 2 | 0 | 2 |  |
| <u>PKDREJ</u>  | 2 | 2 | 0 |  |
| <u>PKI55</u>   | 2 | 2 | 0 |  |
| <u>PKNOX2</u>  | 2 | 2 | 0 |  |
| <u>PLA2G10</u> | 2 | 2 | 0 |  |
| <u>PLA2G16</u> | 2 | 0 | 2 |  |
| <u>PLA2G2E</u> | 2 | 2 | 0 |  |
| <u>PLA2G3</u>  | 2 | 2 | 0 |  |
| <u>PLA2G4C</u> | 2 | 0 | 2 |  |
| <u>PLAC1</u>   | 2 | 2 | 0 |  |
| <u>PLAG1</u>   | 2 | 2 | 0 |  |
| <u>PLCB1</u>   | 2 | 2 | 0 |  |
| <u>PLCB2</u>   | 2 | 2 | 0 |  |
| <u>PLCE1</u>   | 2 | 2 | 0 |  |
| <u>PLCG2</u>   | 2 | 0 | 2 |  |
| <u>PLD1</u>    | 2 | 2 | 0 |  |
| <u>PLEKHA1</u> | 2 | 0 | 2 |  |
| <u>PLEKHB2</u> | 2 | 0 | 2 |  |
| <u>PLEKHF2</u> | 2 | 0 | 2 |  |
| <u>PLEKHM1</u> | 2 | 2 | 0 |  |
| <u>PLIN2</u>   | 2 | 2 | 0 |  |

|                 |   |   |   |  |
|-----------------|---|---|---|--|
| <u>PLK4</u>     | 2 | 2 | 0 |  |
| <u>PLOD3</u>    | 2 | 0 | 2 |  |
| <u>PLP1</u>     | 2 | 0 | 2 |  |
| <u>PLXDC1</u>   | 2 | 2 | 0 |  |
| <u>PLXNB2</u>   | 2 | 2 | 0 |  |
| <u>PMAIP1</u>   | 2 | 2 | 0 |  |
| <u>PMF1</u>     | 2 | 2 | 0 |  |
| <u>PMM2</u>     | 2 | 2 | 0 |  |
| <u>PNLIPRP1</u> | 2 | 2 | 0 |  |
| <u>PNMT</u>     | 2 | 2 | 0 |  |
| <u>PNN</u>      | 2 | 0 | 2 |  |
| <u>PODXL2</u>   | 2 | 2 | 0 |  |
| <u>POFUT1</u>   | 2 | 2 | 0 |  |
| <u>POFUT2</u>   | 2 | 2 | 0 |  |
| <u>POLDIP3</u>  | 2 | 2 | 0 |  |
| <u>POLH</u>     | 2 | 2 | 0 |  |
| <u>POLL</u>     | 2 | 2 | 0 |  |
| <u>POLR1C</u>   | 2 | 0 | 2 |  |
| <u>POLR3C</u>   | 2 | 2 | 0 |  |
| <u>POLR3E</u>   | 2 | 0 | 2 |  |
| <u>POLR3K</u>   | 2 | 2 | 0 |  |
| <u>POLRMT</u>   | 2 | 2 | 0 |  |
| POM121          | 2 | 2 | 0 |  |
| POM121L2        | 2 | 2 | 0 |  |
| <u>POP7</u>     | 2 | 2 | 0 |  |
| <u>PORCN</u>    | 2 | 2 | 0 |  |
| <u>POU3F1</u>   | 2 | 2 | 0 |  |
| POU6F2          | 2 | 2 | 0 |  |
| <u>PPAP2A</u>   | 2 | 2 | 0 |  |
| <u>PPFIA2</u>   | 2 | 2 | 0 |  |
| <u>PIIB</u>     | 2 | 2 | 0 |  |
| <u>PPIE</u>     | 2 | 0 | 2 |  |
| <u>PPIF</u>     | 2 | 0 | 2 |  |
| <u>PPP1CA</u>   | 2 | 0 | 2 |  |
| <u>PPP1R12B</u> | 2 | 2 | 0 |  |
| <u>PPP1R13B</u> | 2 | 2 | 0 |  |
| <u>PPP1R13L</u> | 2 | 2 | 0 |  |
| <u>PPP1R14B</u> | 2 | 2 | 0 |  |
| PPP1R2P9        | 2 | 2 | 0 |  |
| <u>PPP2R1B</u>  | 2 | 2 | 0 |  |
| <u>PPP3CB</u>   | 2 | 2 | 0 |  |
| <u>PPP4R1</u>   | 2 | 2 | 0 |  |
| <u>PPP5C</u>    | 2 | 2 | 0 |  |
| PPPDE1          | 2 | 2 | 0 |  |
| <u>PPT2</u>     | 2 | 0 | 2 |  |
| <u>PPY</u>      | 2 | 2 | 0 |  |
| <u>PQLC1</u>    | 2 | 0 | 2 |  |
| <u>PRDM12</u>   | 2 | 2 | 0 |  |

|                |   |   |   |  |
|----------------|---|---|---|--|
| <u>PRDM2</u>   | 2 | 2 | 0 |  |
| <u>PRDM5</u>   | 2 | 2 | 0 |  |
| <u>PRDX2</u>   | 2 | 2 | 0 |  |
| <u>PRG3</u>    | 2 | 2 | 0 |  |
| <u>PRKAB1</u>  | 2 | 2 | 0 |  |
| <u>PRKACG</u>  | 2 | 2 | 0 |  |
| <u>PRKCB</u>   | 2 | 0 | 2 |  |
| <u>PRKCG</u>   | 2 | 2 | 0 |  |
| <u>PRKCH</u>   | 2 | 0 | 2 |  |
| <u>PRKG1</u>   | 2 | 2 | 0 |  |
| <u>PRKX</u>    | 2 | 2 | 0 |  |
| <u>PRL</u>     | 2 | 2 | 0 |  |
| <u>PRLH</u>    | 2 | 2 | 0 |  |
| <u>PRMT3</u>   | 2 | 0 | 2 |  |
| <u>PROC</u>    | 2 | 2 | 0 |  |
| <u>PRODH2</u>  | 2 | 2 | 0 |  |
| <u>PRPF19</u>  | 2 | 2 | 0 |  |
| <u>PRPF4</u>   | 2 | 0 | 2 |  |
| <u>PRPF40A</u> | 2 | 0 | 2 |  |
| <u>PRPH2</u>   | 2 | 2 | 0 |  |
| <u>PRR5</u>    | 2 | 2 | 0 |  |
| <u>PRRX1</u>   | 2 | 2 | 0 |  |
| <u>PRSS1</u>   | 2 | 0 | 2 |  |
| <u>PRSS21</u>  | 2 | 2 | 0 |  |
| <u>PRSS23</u>  | 2 | 0 | 2 |  |
| <u>PRSS8</u>   | 2 | 2 | 0 |  |
| <u>PRX</u>     | 2 | 2 | 0 |  |
| <u>PSAT1</u>   | 2 | 0 | 2 |  |
| <u>PSD</u>     | 2 | 2 | 0 |  |
| <u>PSG1</u>    | 2 | 2 | 0 |  |
| <u>PSG2</u>    | 2 | 2 | 0 |  |
| <u>PSG3</u>    | 2 | 2 | 0 |  |
| <u>PSG4</u>    | 2 | 2 | 0 |  |
| <u>PSG5</u>    | 2 | 2 | 0 |  |
| <u>PSMD12</u>  | 2 | 0 | 2 |  |
| <u>PSMD5</u>   | 2 | 2 | 0 |  |
| <u>PSME2</u>   | 2 | 0 | 2 |  |
| <u>PSMF1</u>   | 2 | 2 | 0 |  |
| <u>PSMG1</u>   | 2 | 0 | 2 |  |
| <u>PSMG2</u>   | 2 | 0 | 2 |  |
| <u>PTCD1</u>   | 2 | 2 | 0 |  |
| <u>PTEN</u>    | 2 | 2 | 0 |  |
| <u>PTENP1</u>  | 2 | 2 | 0 |  |
| <u>PTGER1</u>  | 2 | 2 | 0 |  |
| <u>PTGER4</u>  | 2 | 2 | 0 |  |
| <u>PTGES2</u>  | 2 | 2 | 0 |  |
| <u>PTGES3</u>  | 2 | 0 | 2 |  |
| <u>PTGIS</u>   | 2 | 2 | 0 |  |

|                  |   |   |   |  |
|------------------|---|---|---|--|
| <u>PTK2B</u>     | 2 | 2 | 0 |  |
| <u>PTK7</u>      | 2 | 2 | 0 |  |
| <u>PTP4A2</u>    | 2 | 0 | 2 |  |
| <u>PTPN14</u>    | 2 | 2 | 0 |  |
| <u>PTPRCAP</u>   | 2 | 2 | 0 |  |
| <u>PTPRK</u>     | 2 | 2 | 0 |  |
| <u>PTPRM</u>     | 2 | 2 | 0 |  |
| <u>PTS</u>       | 2 | 0 | 2 |  |
| <u>PUF60</u>     | 2 | 2 | 0 |  |
| <u>PUM1</u>      | 2 | 2 | 0 |  |
| <u>PUS1</u>      | 2 | 0 | 2 |  |
| <u>PVR</u>       | 2 | 2 | 0 |  |
| <u>PVRL1</u>     | 2 | 2 | 0 |  |
| <u>PVRL3</u>     | 2 | 2 | 0 |  |
| <u>PXDN</u>      | 2 | 2 | 0 |  |
| <u>PYCARD</u>    | 2 | 2 | 0 |  |
| <u>PYCR1</u>     | 2 | 0 | 2 |  |
| <u>PYGL</u>      | 2 | 2 | 0 |  |
| <u>PZP</u>       | 2 | 2 | 0 |  |
| <u>QPR1</u>      | 2 | 0 | 2 |  |
| <u>QSER1</u>     | 2 | 2 | 0 |  |
| <u>QTRT1</u>     | 2 | 2 | 0 |  |
| <u>R3HDM2</u>    | 2 | 0 | 2 |  |
| <u>RAB11B</u>    | 2 | 2 | 0 |  |
| <u>RAB11FIP1</u> | 2 | 0 | 2 |  |
| <u>RAB11FIP2</u> | 2 | 0 | 2 |  |
| <u>RAB11FIP5</u> | 2 | 0 | 2 |  |
| <u>RAB15</u>     | 2 | 0 | 2 |  |
| <u>RAB17</u>     | 2 | 0 | 2 |  |
| <u>RAB1A</u>     | 2 | 0 | 2 |  |
| <u>RAB21</u>     | 2 | 2 | 0 |  |
| <u>RAB22A</u>    | 2 | 0 | 2 |  |
| <u>RAB23</u>     | 2 | 2 | 0 |  |
| <u>RAB25</u>     | 2 | 0 | 2 |  |
| <u>RAB26</u>     | 2 | 2 | 0 |  |
| <u>RAB38</u>     | 2 | 2 | 0 |  |
| <u>RAB3A</u>     | 2 | 2 | 0 |  |
| <u>RAB40A</u>    | 2 | 2 | 0 |  |
| <u>RAB40C</u>    | 2 | 2 | 0 |  |
| <u>RAB5A</u>     | 2 | 2 | 0 |  |
| <u>RAB8A</u>     | 2 | 2 | 0 |  |
| <u>RABEP2</u>    | 2 | 0 | 2 |  |
| <u>RABEPK</u>    | 2 | 0 | 2 |  |
| <u>RABGGTA</u>   | 2 | 2 | 0 |  |
| <u>RAC1</u>      | 2 | 0 | 2 |  |
| <u>RAC2</u>      | 2 | 0 | 2 |  |
| <u>RAD51B</u>    | 2 | 2 | 0 |  |
| <u>RAD52</u>     | 2 | 2 | 0 |  |

|                  |   |   |   |  |
|------------------|---|---|---|--|
| <u>RAE1</u>      | 2 | 0 | 2 |  |
| <u>RAI1</u>      | 2 | 2 | 0 |  |
| <u>RAI14</u>     | 2 | 2 | 0 |  |
| <u>RALB</u>      | 2 | 0 | 2 |  |
| <u>RALBP1</u>    | 2 | 0 | 2 |  |
| <u>RALGPS2</u>   | 2 | 2 | 0 |  |
| <u>RAMP2</u>     | 2 | 2 | 0 |  |
| <u>RAP1A</u>     | 2 | 2 | 0 |  |
| <u>RAP1GAP2</u>  | 2 | 0 | 2 |  |
| <u>RAP2A</u>     | 2 | 2 | 0 |  |
| <u>RAP2B</u>     | 2 | 2 | 0 |  |
| <u>RAPGEF5</u>   | 2 | 2 | 0 |  |
| <u>RASAL1</u>    | 2 | 2 | 0 |  |
| <u>RASGRF1</u>   | 2 | 2 | 0 |  |
| <u>RASL10A</u>   | 2 | 2 | 0 |  |
| <u>RASSF2</u>    | 2 | 0 | 2 |  |
| <u>RASSF7</u>    | 2 | 2 | 0 |  |
| <u>RB1</u>       | 2 | 2 | 0 |  |
| <u>RBBP8</u>     | 2 | 0 | 2 |  |
| <u>RBBP9</u>     | 2 | 2 | 0 |  |
| <u>RBCK1</u>     | 2 | 0 | 2 |  |
| <u>RBKS</u>      | 2 | 0 | 2 |  |
| <u>RBM10</u>     | 2 | 0 | 2 |  |
| <u>RBM28</u>     | 2 | 0 | 2 |  |
| <u>RBM3</u>      | 2 | 2 | 0 |  |
| <u>RBM47</u>     | 2 | 2 | 0 |  |
| <u>RBM6</u>      | 2 | 0 | 2 |  |
| <u>RBP4</u>      | 2 | 2 | 0 |  |
| <u>REC8</u>      | 2 | 2 | 0 |  |
| <u>RECK</u>      | 2 | 2 | 0 |  |
| <u>REPIN1</u>    | 2 | 2 | 0 |  |
| <u>REGL</u>      | 2 | 2 | 0 |  |
| <u>RFC4</u>      | 2 | 0 | 2 |  |
| <u>RFNG</u>      | 2 | 2 | 0 |  |
| <u>RFPL1-AS1</u> | 2 | 2 | 0 |  |
| <u>RFX1</u>      | 2 | 2 | 0 |  |
| <u>RFX5</u>      | 2 | 0 | 2 |  |
| <u>RGP1</u>      | 2 | 2 | 0 |  |
| <u>RGS1</u>      | 2 | 2 | 0 |  |
| <u>RGS12</u>     | 2 | 2 | 0 |  |
| <u>RGS14</u>     | 2 | 2 | 0 |  |
| <u>RGS5</u>      | 2 | 2 | 0 |  |
| <u>RGS9</u>      | 2 | 2 | 0 |  |
| <u>RHBDF1</u>    | 2 | 2 | 0 |  |
| <u>RHBDF2</u>    | 2 | 2 | 0 |  |
| <u>RHOBTB3</u>   | 2 | 2 | 0 |  |
| <u>RIC3</u>      | 2 | 2 | 0 |  |
| <u>RIC8B</u>     | 2 | 0 | 2 |  |

|                 |   |   |   |  |
|-----------------|---|---|---|--|
| <u>RIMBP2</u>   | 2 | 2 | 0 |  |
| RIMS1           | 2 | 2 | 0 |  |
| RLBP1           | 2 | 2 | 0 |  |
| <u>RLN1</u>     | 2 | 2 | 0 |  |
| <u>RMI1</u>     | 2 | 0 | 2 |  |
| <u>RNASEH2B</u> | 2 | 2 | 0 |  |
| <u>RNF11</u>    | 2 | 0 | 2 |  |
| <u>RNF115</u>   | 2 | 2 | 0 |  |
| <u>RNF141</u>   | 2 | 2 | 0 |  |
| <u>RNF185</u>   | 2 | 2 | 0 |  |
| <u>RNF186</u>   | 2 | 2 | 0 |  |
| <u>RNF187</u>   | 2 | 0 | 2 |  |
| <u>RNF208</u>   | 2 | 2 | 0 |  |
| <u>RNF220</u>   | 2 | 0 | 2 |  |
| <u>RNF44</u>    | 2 | 0 | 2 |  |
| <u>RNPS1</u>    | 2 | 2 | 0 |  |
| <u>ROCK1</u>    | 2 | 0 | 2 |  |
| ROPN1B          | 2 | 2 | 0 |  |
| <u>RPA3</u>     | 2 | 0 | 2 |  |
| RPAP2           | 2 | 2 | 0 |  |
| <u>RPF1</u>     | 2 | 0 | 2 |  |
| <u>RPL12</u>    | 2 | 0 | 2 |  |
| <u>RPL13A</u>   | 2 | 0 | 2 |  |
| <u>RPL13P5</u>  | 2 | 2 | 0 |  |
| <u>RPL14</u>    | 2 | 0 | 2 |  |
| <u>RPL17</u>    | 2 | 0 | 2 |  |
| RPL18           | 2 | 0 | 2 |  |
| <u>RPL19</u>    | 2 | 0 | 2 |  |
| <u>RPL21</u>    | 2 | 0 | 2 |  |
| <u>RPL23A</u>   | 2 | 0 | 2 |  |
| <u>RPL27</u>    | 2 | 0 | 2 |  |
| <u>RPL27A</u>   | 2 | 0 | 2 |  |
| <u>RPL29</u>    | 2 | 0 | 2 |  |
| <u>RPL3</u>     | 2 | 0 | 2 |  |
| <u>RPL30</u>    | 2 | 0 | 2 |  |
| <u>RPL35</u>    | 2 | 0 | 2 |  |
| <u>RPL36A</u>   | 2 | 0 | 2 |  |
| <u>RPL37</u>    | 2 | 0 | 2 |  |
| <u>RPL37A</u>   | 2 | 0 | 2 |  |
| <u>RPL6</u>     | 2 | 0 | 2 |  |
| <u>RPL7A</u>    | 2 | 0 | 2 |  |
| <u>RPL9</u>     | 2 | 0 | 2 |  |
| <u>RPLP0</u>    | 2 | 0 | 2 |  |
| <u>RPLP1</u>    | 2 | 0 | 2 |  |
| <u>RPRD2</u>    | 2 | 2 | 0 |  |
| <u>RPS10</u>    | 2 | 0 | 2 |  |
| <u>RPS12</u>    | 2 | 0 | 2 |  |
| <u>RPS13</u>    | 2 | 0 | 2 |  |

|                |   |   |   |  |
|----------------|---|---|---|--|
| <u>RPS16</u>   | 2 | 0 | 2 |  |
| <u>RPS17</u>   | 2 | 0 | 2 |  |
| <u>RPS2</u>    | 2 | 0 | 2 |  |
| <u>RPS20</u>   | 2 | 0 | 2 |  |
| <u>RPS24</u>   | 2 | 0 | 2 |  |
| <u>RPS27A</u>  | 2 | 0 | 2 |  |
| <u>RPS29</u>   | 2 | 0 | 2 |  |
| <u>RPS3</u>    | 2 | 0 | 2 |  |
| <u>RPS4X</u>   | 2 | 0 | 2 |  |
| <u>RPS6KC1</u> | 2 | 0 | 2 |  |
| <u>RPS7</u>    | 2 | 0 | 2 |  |
| <u>RPSA</u>    | 2 | 0 | 2 |  |
| <u>RRH</u>     | 2 | 2 | 0 |  |
| <u>RRM2</u>    | 2 | 2 | 0 |  |
| <u>RRNAD1</u>  | 2 | 0 | 2 |  |
| <u>RRP15</u>   | 2 | 0 | 2 |  |
| <u>RSAD1</u>   | 2 | 0 | 2 |  |
| <u>RSL24D1</u> | 2 | 0 | 2 |  |
| <u>RSU1</u>    | 2 | 2 | 0 |  |
| <u>RTEL1</u>   | 2 | 2 | 0 |  |
| <u>RUNX1</u>   | 2 | 2 | 0 |  |
| <u>RUNX1T1</u> | 2 | 2 | 0 |  |
| <u>RUNX2</u>   | 2 | 2 | 0 |  |
| <u>RUNX3</u>   | 2 | 0 | 2 |  |
| <u>RUVBL1</u>  | 2 | 0 | 2 |  |
| <u>RWDD2B</u>  | 2 | 0 | 2 |  |
| <u>RYR2</u>    | 2 | 2 | 0 |  |
| <u>S100A6</u>  | 2 | 2 | 0 |  |
| <u>S100A8</u>  | 2 | 2 | 0 |  |
| <u>S100G</u>   | 2 | 2 | 0 |  |
| <u>SAMD4A</u>  | 2 | 2 | 0 |  |
| <u>SAMSN1</u>  | 2 | 2 | 0 |  |
| <u>SAP30BP</u> | 2 | 0 | 2 |  |
| <u>SARDH</u>   | 2 | 2 | 0 |  |
| <u>SASH1</u>   | 2 | 0 | 2 |  |
| <u>SAT1</u>    | 2 | 2 | 0 |  |
| <u>SC5DL</u>   | 2 | 2 | 0 |  |
| <u>SCAPER</u>  | 2 | 2 | 0 |  |
| <u>SCARF1</u>  | 2 | 2 | 0 |  |
| <u>SCIN</u>    | 2 | 2 | 0 |  |
| <u>SCML2</u>   | 2 | 0 | 2 |  |
| <u>SCN3B</u>   | 2 | 2 | 0 |  |
| <u>SCN8A</u>   | 2 | 2 | 0 |  |
| <u>SCNN1G</u>  | 2 | 2 | 0 |  |
| <u>SCRG1</u>   | 2 | 2 | 0 |  |
| <u>SCRN1</u>   | 2 | 2 | 0 |  |
| <u>SCTR</u>    | 2 | 2 | 0 |  |
| <u>SCUBE2</u>  | 2 | 0 | 2 |  |

|                  |   |   |   |  |
|------------------|---|---|---|--|
| <u>SDC1</u>      | 2 | 2 | 0 |  |
| <u>SDCBP</u>     | 2 | 2 | 0 |  |
| <u>SDCCAG3</u>   | 2 | 0 | 2 |  |
| <u>SDF2L1</u>    | 2 | 2 | 0 |  |
| <u>SDF4</u>      | 2 | 0 | 2 |  |
| <u>SDHA</u>      | 2 | 2 | 0 |  |
| <u>SEC14L1</u>   | 2 | 2 | 0 |  |
| <u>SEC61G</u>    | 2 | 0 | 2 |  |
| <u>SECISBP2</u>  | 2 | 0 | 2 |  |
| <u>SEL1L3</u>    | 2 | 0 | 2 |  |
| <u>SELENBP1</u>  | 2 | 2 | 0 |  |
| <u>SELL</u>      | 2 | 0 | 2 |  |
| <u>SEMA3A</u>    | 2 | 2 | 0 |  |
| <u>SEMA4D</u>    | 2 | 2 | 0 |  |
| <u>SEMG1</u>     | 2 | 2 | 0 |  |
| <u>SENP3</u>     | 2 | 2 | 0 |  |
| <u>SERINC3</u>   | 2 | 0 | 2 |  |
| <u>SERPINA1</u>  | 2 | 2 | 0 |  |
| <u>SERPINB13</u> | 2 | 2 | 0 |  |
| <u>SERPINB6</u>  | 2 | 0 | 2 |  |
| <u>SERPINB8</u>  | 2 | 2 | 0 |  |
| <u>SERPINB9</u>  | 2 | 2 | 0 |  |
| <u>SERPINI2</u>  | 2 | 2 | 0 |  |
| <u>SERTAD3</u>   | 2 | 2 | 0 |  |
| <u>SET</u>       | 2 | 0 | 2 |  |
| <u>SETX</u>      | 2 | 0 | 2 |  |
| <u>SF3A3</u>     | 2 | 0 | 2 |  |
| <u>SF3B3</u>     | 2 | 2 | 0 |  |
| <u>SH2D1A</u>    | 2 | 2 | 0 |  |
| <u>SH2D2A</u>    | 2 | 2 | 0 |  |
| <u>SH2D3C</u>    | 2 | 2 | 0 |  |
| <u>SH3BGR</u>    | 2 | 2 | 0 |  |
| <u>SH3BP1</u>    | 2 | 0 | 2 |  |
| <u>SH3GL1</u>    | 2 | 2 | 0 |  |
| <u>SH3GL3</u>    | 2 | 2 | 0 |  |
| <u>SH3TC2</u>    | 2 | 2 | 0 |  |
| <u>SH3YL1</u>    | 2 | 0 | 2 |  |
| <u>SHB</u>       | 2 | 2 | 0 |  |
| <u>SHMT2</u>     | 2 | 0 | 2 |  |
| <u>SHOX2</u>     | 2 | 2 | 0 |  |
| <u>SIGIRR</u>    | 2 | 0 | 2 |  |
| <u>SIGLEC1</u>   | 2 | 2 | 0 |  |
| <u>SIGLEC15</u>  | 2 | 0 | 2 |  |
| <u>SIGLEC7</u>   | 2 | 2 | 0 |  |
| <u>SIRT4</u>     | 2 | 2 | 0 |  |
| <u>SIX3</u>      | 2 | 2 | 0 |  |
| <u>SKIV2L</u>    | 2 | 0 | 2 |  |
| <u>SLC11A1</u>   | 2 | 2 | 0 |  |

|                   |   |   |   |  |
|-------------------|---|---|---|--|
| <u>SLC12A4</u>    | 2 | 2 | 0 |  |
| <u>SLC12A5</u>    | 2 | 2 | 0 |  |
| <u>SLC13A4</u>    | 2 | 2 | 0 |  |
| <u>SLC16A8</u>    | 2 | 2 | 0 |  |
| <u>SLC17A2</u>    | 2 | 2 | 0 |  |
| <u>SLC17A3</u>    | 2 | 2 | 0 |  |
| <u>SLC17A5</u>    | 2 | 0 | 2 |  |
| <u>SLC19A1</u>    | 2 | 2 | 0 |  |
| <u>SLC19A3</u>    | 2 | 2 | 0 |  |
| <u>SLC1A3</u>     | 2 | 2 | 0 |  |
| <u>SLC22A18</u>   | 2 | 0 | 2 |  |
| <u>SLC22A18AS</u> | 2 | 2 | 0 |  |
| <u>SLC22A6</u>    | 2 | 2 | 0 |  |
| <u>SLC23A2</u>    | 2 | 2 | 0 |  |
| <u>SLC25A1</u>    | 2 | 2 | 0 |  |
| <u>SLC25A13</u>   | 2 | 0 | 2 |  |
| <u>SLC25A15</u>   | 2 | 0 | 2 |  |
| <u>SLC25A16</u>   | 2 | 2 | 0 |  |
| <u>SLC25A23</u>   | 2 | 2 | 0 |  |
| <u>SLC25A28</u>   | 2 | 0 | 2 |  |
| <u>SLC26A3</u>    | 2 | 2 | 0 |  |
| <u>SLC27A2</u>    | 2 | 0 | 2 |  |
| <u>SLC27A5</u>    | 2 | 2 | 0 |  |
| <u>SLC28A2</u>    | 2 | 2 | 0 |  |
| <u>SLC2A4</u>     | 2 | 2 | 0 |  |
| <u>SLC30A1</u>    | 2 | 0 | 2 |  |
| <u>SLC30A9</u>    | 2 | 0 | 2 |  |
| <u>SLC35A3</u>    | 2 | 0 | 2 |  |
| <u>SLC38A1</u>    | 2 | 2 | 0 |  |
| <u>SLC39A2</u>    | 2 | 2 | 0 |  |
| <u>SLC39A6</u>    | 2 | 0 | 2 |  |
| <u>SLC3A1</u>     | 2 | 2 | 0 |  |
| <u>SLC44A1</u>    | 2 | 0 | 2 |  |
| <u>SLC48A1</u>    | 2 | 0 | 2 |  |
| <u>SLC5A1</u>     | 2 | 2 | 0 |  |
| <u>SLC5A2</u>     | 2 | 2 | 0 |  |
| <u>SLC6A7</u>     | 2 | 2 | 0 |  |
| <u>SLC7A1</u>     | 2 | 2 | 0 |  |
| <u>SLC7A4</u>     | 2 | 2 | 0 |  |
| <u>SLC7A9</u>     | 2 | 2 | 0 |  |
| <u>SLC9A2</u>     | 2 | 2 | 0 |  |
| <u>SLC9A3R2</u>   | 2 | 2 | 0 |  |
| <u>SLC01C1</u>    | 2 | 2 | 0 |  |
| <u>SLC02A1</u>    | 2 | 2 | 0 |  |
| <u>SLIT3</u>      | 2 | 2 | 0 |  |
| <u>SLK</u>        | 2 | 0 | 2 |  |
| <u>SLPI</u>       | 2 | 0 | 2 |  |
| <u>SLURP1</u>     | 2 | 2 | 0 |  |

|                |   |   |   |  |
|----------------|---|---|---|--|
| <u>SMAD4</u>   | 2 | 2 | 0 |  |
| <u>SMARCA1</u> | 2 | 2 | 0 |  |
| <u>SMARCC2</u> | 2 | 0 | 2 |  |
| <u>SMARCD2</u> | 2 | 0 | 2 |  |
| <u>SMARCD3</u> | 2 | 2 | 0 |  |
| <u>SMG9</u>    | 2 | 2 | 0 |  |
| <u>SMURF1</u>  | 2 | 2 | 0 |  |
| <u>SND1</u>    | 2 | 2 | 0 |  |
| <u>SNRK</u>    | 2 | 2 | 0 |  |
| <u>SNRNP25</u> | 2 | 2 | 0 |  |
| <u>SNRPA1</u>  | 2 | 0 | 2 |  |
| <u>SNTB2</u>   | 2 | 2 | 0 |  |
| <u>SNUPN</u>   | 2 | 0 | 2 |  |
| <u>SNX11</u>   | 2 | 0 | 2 |  |
| <u>SNX3</u>    | 2 | 0 | 2 |  |
| <u>SNX4</u>    | 2 | 0 | 2 |  |
| <u>SNX6</u>    | 2 | 0 | 2 |  |
| <u>SOAT2</u>   | 2 | 2 | 0 |  |
| <u>SOCS3</u>   | 2 | 2 | 0 |  |
| <u>SOCS7</u>   | 2 | 2 | 0 |  |
| <u>SOD1</u>    | 2 | 0 | 2 |  |
| <u>SOLH</u>    | 2 | 2 | 0 |  |
| <u>SORBS3</u>  | 2 | 0 | 2 |  |
| <u>SORCS3</u>  | 2 | 2 | 0 |  |
| <u>SOS2</u>    | 2 | 2 | 0 |  |
| <u>SOX1</u>    | 2 | 2 | 0 |  |
| <u>SOX14</u>   | 2 | 2 | 0 |  |
| <u>SOX15</u>   | 2 | 2 | 0 |  |
| <u>SOX18</u>   | 2 | 2 | 0 |  |
| <u>SOX2</u>    | 2 | 2 | 0 |  |
| <u>SOX21</u>   | 2 | 2 | 0 |  |
| <u>SOX3</u>    | 2 | 2 | 0 |  |
| <u>SOX5</u>    | 2 | 2 | 0 |  |
| <u>SP1</u>     | 2 | 2 | 0 |  |
| <u>SP110</u>   | 2 | 0 | 2 |  |
| <u>SPAG6</u>   | 2 | 2 | 0 |  |
| <u>SPAG8</u>   | 2 | 2 | 0 |  |
| <u>SPCS3</u>   | 2 | 2 | 0 |  |
| <u>SPEG</u>    | 2 | 0 | 2 |  |
| <u>SPHK2</u>   | 2 | 2 | 0 |  |
| <u>SPI1</u>    | 2 | 2 | 0 |  |
| <u>SPINK2</u>  | 2 | 2 | 0 |  |
| <u>SPINK5</u>  | 2 | 2 | 0 |  |
| <u>SPINLW1</u> | 2 | 2 | 0 |  |
| <u>SPN</u>     | 2 | 2 | 0 |  |
| <u>SPP1</u>    | 2 | 0 | 2 |  |
| <u>SPPL2B</u>  | 2 | 2 | 0 |  |
| <u>SPR</u>     | 2 | 2 | 0 |  |

|                |   |   |   |  |
|----------------|---|---|---|--|
| <u>SPRY2</u>   | 2 | 0 | 2 |  |
| <u>SPTB</u>    | 2 | 2 | 0 |  |
| <u>SPTBN2</u>  | 2 | 2 | 0 |  |
| <u>SPTLC1</u>  | 2 | 0 | 2 |  |
| <u>SRCAP</u>   | 2 | 2 | 0 |  |
| <u>SREBF2</u>  | 2 | 0 | 2 |  |
| <u>SRF</u>     | 2 | 2 | 0 |  |
| <u>SRP54</u>   | 2 | 0 | 2 |  |
| <u>SRPX2</u>   | 2 | 2 | 0 |  |
| <u>SSX2IP</u>  | 2 | 2 | 0 |  |
| <u>SSX3</u>    | 2 | 2 | 0 |  |
| <u>ST18</u>    | 2 | 2 | 0 |  |
| <u>ST8SIA2</u> | 2 | 2 | 0 |  |
| <u>ST8SIA4</u> | 2 | 2 | 0 |  |
| <u>STAB2</u>   | 2 | 2 | 0 |  |
| <u>STAG1</u>   | 2 | 2 | 0 |  |
| <u>STAT1</u>   | 2 | 0 | 2 |  |
| <u>STK25</u>   | 2 | 0 | 2 |  |
| <u>STK4</u>    | 2 | 2 | 0 |  |
| <u>STRN</u>    | 2 | 2 | 0 |  |
| <u>STX12</u>   | 2 | 0 | 2 |  |
| <u>STX8</u>    | 2 | 2 | 0 |  |
| <u>STXBP1</u>  | 2 | 0 | 2 |  |
| <u>STXBP6</u>  | 2 | 2 | 0 |  |
| <u>STYK1</u>   | 2 | 2 | 0 |  |
| <u>SULF1</u>   | 2 | 2 | 0 |  |
| <u>SULT1E1</u> | 2 | 2 | 0 |  |
| <u>SUPT16H</u> | 2 | 0 | 2 |  |
| <u>SUPT6H</u>  | 2 | 0 | 2 |  |
| <u>SV2A</u>    | 2 | 2 | 0 |  |
| <u>SVEP1</u>   | 2 | 2 | 0 |  |
| <u>SYCP1</u>   | 2 | 2 | 0 |  |
| <u>SYMPK</u>   | 2 | 0 | 2 |  |
| <u>SYNCRIP</u> | 2 | 0 | 2 |  |
| <u>SYNE1</u>   | 2 | 2 | 0 |  |
| <u>SYNE2</u>   | 2 | 0 | 2 |  |
| <u>SYNJ2BP</u> | 2 | 2 | 0 |  |
| <u>SYNPO2L</u> | 2 | 2 | 0 |  |
| <u>SYT5</u>    | 2 | 2 | 0 |  |
| <u>TACR1</u>   | 2 | 2 | 0 |  |
| <u>TAF1</u>    | 2 | 2 | 0 |  |
| <u>TAF12</u>   | 2 | 0 | 2 |  |
| <u>TAF15</u>   | 2 | 2 | 0 |  |
| <u>TAF1D</u>   | 2 | 0 | 2 |  |
| <u>TAF2</u>    | 2 | 0 | 2 |  |
| <u>TAF4</u>    | 2 | 2 | 0 |  |
| <u>TAF6</u>    | 2 | 2 | 0 |  |
| <u>TAF9B</u>   | 2 | 2 | 0 |  |

|                |   |   |   |  |
|----------------|---|---|---|--|
| <u>TAGLN3</u>  | 2 | 2 | 0 |  |
| <u>TALDO1</u>  | 2 | 0 | 2 |  |
| <u>TANC2</u>   | 2 | 2 | 0 |  |
| <u>TAPBPL</u>  | 2 | 2 | 0 |  |
| <u>TAS2R10</u> | 2 | 2 | 0 |  |
| <u>TBC1D12</u> | 2 | 2 | 0 |  |
| <u>TBCD</u>    | 2 | 2 | 0 |  |
| <u>TBX10</u>   | 2 | 2 | 0 |  |
| <u>TCEA1</u>   | 2 | 0 | 2 |  |
| <u>TCEAL4</u>  | 2 | 0 | 2 |  |
| <u>TCEB3B</u>  | 2 | 2 | 0 |  |
| <u>TCF12</u>   | 2 | 2 | 0 |  |
| <u>TCF7L2</u>  | 2 | 2 | 0 |  |
| <u>TCL6</u>    | 2 | 2 | 0 |  |
| <u>TCP11</u>   | 2 | 2 | 0 |  |
| <u>TCTN1</u>   | 2 | 2 | 0 |  |
| <u>TDO2</u>    | 2 | 2 | 0 |  |
| <u>TEKT2</u>   | 2 | 2 | 0 |  |
| <u>TESC</u>    | 2 | 2 | 0 |  |
| <u>TEX2</u>    | 2 | 0 | 2 |  |
| <u>TFAP2B</u>  | 2 | 2 | 0 |  |
| <u>TFB1M</u>   | 2 | 0 | 2 |  |
| <u>TFF1</u>    | 2 | 0 | 2 |  |
| <u>TFRC</u>    | 2 | 0 | 2 |  |
| <u>TGFB3</u>   | 2 | 2 | 0 |  |
| <u>TGFBR1</u>  | 2 | 2 | 0 |  |
| <u>TGIF2</u>   | 2 | 2 | 0 |  |
| <u>TGOLN2</u>  | 2 | 2 | 0 |  |
| <u>THAP3</u>   | 2 | 2 | 0 |  |
| <u>THBS2</u>   | 2 | 2 | 0 |  |
| <u>THOP1</u>   | 2 | 2 | 0 |  |
| <u>THUMPD2</u> | 2 | 2 | 0 |  |
| <u>THY1</u>    | 2 | 2 | 0 |  |
| <u>TIMM17A</u> | 2 | 2 | 0 |  |
| <u>TIMM17B</u> | 2 | 0 | 2 |  |
| <u>TIMM22</u>  | 2 | 2 | 0 |  |
| <u>TIMM8A</u>  | 2 | 2 | 0 |  |
| <u>TINF2</u>   | 2 | 0 | 2 |  |
| <u>TJP1</u>    | 2 | 0 | 2 |  |
| <u>TJP2</u>    | 2 | 0 | 2 |  |
| <u>TK1</u>     | 2 | 2 | 0 |  |
| <u>TLE3</u>    | 2 | 0 | 2 |  |
| <u>TLE6</u>    | 2 | 0 | 2 |  |
| <u>TLK2</u>    | 2 | 2 | 0 |  |
| <u>TM2D3</u>   | 2 | 0 | 2 |  |
| <u>TM4SF1</u>  | 2 | 2 | 0 |  |
| <u>TM4SF5</u>  | 2 | 2 | 0 |  |
| <u>TMBIM6</u>  | 2 | 0 | 2 |  |

|                 |   |   |   |  |
|-----------------|---|---|---|--|
| <u>TMC5</u>     | 2 | 2 | 0 |  |
| <u>TMC7</u>     | 2 | 2 | 0 |  |
| <u>TMCC2</u>    | 2 | 0 | 2 |  |
| <u>TMED1</u>    | 2 | 2 | 0 |  |
| <u>TMED7</u>    | 2 | 0 | 2 |  |
| <u>TMEM104</u>  | 2 | 0 | 2 |  |
| <u>TMEM127</u>  | 2 | 0 | 2 |  |
| <u>TMEM132A</u> | 2 | 2 | 0 |  |
| <u>TMEM135</u>  | 2 | 2 | 0 |  |
| <u>TMEM140</u>  | 2 | 0 | 2 |  |
| <u>TMEM143</u>  | 2 | 2 | 0 |  |
| <u>TMEM144</u>  | 2 | 2 | 0 |  |
| <u>TMEM147</u>  | 2 | 0 | 2 |  |
| <u>TMEM156</u>  | 2 | 2 | 0 |  |
| <u>TMEM158</u>  | 2 | 2 | 0 |  |
| <u>TMEM176A</u> | 2 | 2 | 0 |  |
| <u>TMEM176B</u> | 2 | 2 | 0 |  |
| <u>TMEM19</u>   | 2 | 2 | 0 |  |
| <u>TMEM22</u>   | 2 | 2 | 0 |  |
| <u>TMEM33</u>   | 2 | 0 | 2 |  |
| <u>TMEM40</u>   | 2 | 2 | 0 |  |
| <u>TMEM45A</u>  | 2 | 0 | 2 |  |
| <u>TMEM47</u>   | 2 | 0 | 2 |  |
| <u>TMEM87A</u>  | 2 | 0 | 2 |  |
| <u>TMPO</u>     | 2 | 2 | 0 |  |
| <u>TMPRSS6</u>  | 2 | 2 | 0 |  |
| <u>TMX2</u>     | 2 | 0 | 2 |  |
| <u>TMX4</u>     | 2 | 2 | 0 |  |
| <u>TNF</u>      | 2 | 2 | 0 |  |
| <u>TNFAIP8</u>  | 2 | 2 | 0 |  |
| <u>TNFRSF4</u>  | 2 | 2 | 0 |  |
| <u>TNFRSF9</u>  | 2 | 2 | 0 |  |
| <u>TNFSF11</u>  | 2 | 2 | 0 |  |
| <u>TNFSF15</u>  | 2 | 2 | 0 |  |
| <u>TNFSF4</u>   | 2 | 2 | 0 |  |
| <u>TNNI3K</u>   | 2 | 2 | 0 |  |
| <u>TNPO1</u>    | 2 | 0 | 2 |  |
| <u>TNPO3</u>    | 2 | 0 | 2 |  |
| <u>TNXB</u>     | 2 | 2 | 0 |  |
| <u>TOMM70A</u>  | 2 | 0 | 2 |  |
| <u>TONSL</u>    | 2 | 2 | 0 |  |
| <u>TOPBP1</u>   | 2 | 0 | 2 |  |
| <u>TOX</u>      | 2 | 2 | 0 |  |
| <u>TP53TG1</u>  | 2 | 0 | 2 |  |
| <u>TP63</u>     | 2 | 2 | 0 |  |
| <u>TP73-AS1</u> | 2 | 2 | 0 |  |
| <u>TPD52L1</u>  | 2 | 2 | 0 |  |
| <u>TPK1</u>     | 2 | 0 | 2 |  |

|                 |   |   |   |  |
|-----------------|---|---|---|--|
| <u>TPM1</u>     | 2 | 0 | 2 |  |
| <u>TPSAB1</u>   | 2 | 2 | 0 |  |
| <u>TPST2</u>    | 2 | 2 | 0 |  |
| <u>TPTE</u>     | 2 | 2 | 0 |  |
| <u>TRABD</u>    | 2 | 2 | 0 |  |
| <u>TRAF3IP3</u> | 2 | 2 | 0 |  |
| <u>TRAP1</u>    | 2 | 0 | 2 |  |
| <u>TRD@</u>     | 2 | 2 | 0 |  |
| <u>TREM2</u>    | 2 | 2 | 0 |  |
| <u>TREML2</u>   | 2 | 2 | 0 |  |
| <u>TRIL</u>     | 2 | 2 | 0 |  |
| <u>TRIM15</u>   | 2 | 2 | 0 |  |
| <u>TRIM23</u>   | 2 | 2 | 0 |  |
| <u>TRIM24</u>   | 2 | 2 | 0 |  |
| <u>TRIM3</u>    | 2 | 2 | 0 |  |
| <u>TRIM44</u>   | 2 | 0 | 2 |  |
| <u>TRIM5</u>    | 2 | 2 | 0 |  |
| <u>TRIM68</u>   | 2 | 2 | 0 |  |
| <u>TRIOBP</u>   | 2 | 2 | 0 |  |
| <u>TRIP10</u>   | 2 | 0 | 2 |  |
| <u>TRMT1</u>    | 2 | 2 | 0 |  |
| <u>TRMT1L</u>   | 2 | 0 | 2 |  |
| <u>TRPC1</u>    | 2 | 2 | 0 |  |
| <u>TRPC7</u>    | 2 | 2 | 0 |  |
| <u>TRPM1</u>    | 2 | 2 | 0 |  |
| <u>TRPM3</u>    | 2 | 2 | 0 |  |
| <u>TRPS1</u>    | 2 | 0 | 2 |  |
| <u>TSC2</u>     | 2 | 2 | 0 |  |
| <u>TSC22D3</u>  | 2 | 2 | 0 |  |
| <u>TSEN34</u>   | 2 | 2 | 0 |  |
| <u>TSHR</u>     | 2 | 2 | 0 |  |
| <u>TSHZ2</u>    | 2 | 2 | 0 |  |
| <u>TSKS</u>     | 2 | 2 | 0 |  |
| <u>TSKU</u>     | 2 | 2 | 0 |  |
| <u>TSPAN3</u>   | 2 | 0 | 2 |  |
| <u>TSPAN5</u>   | 2 | 0 | 2 |  |
| <u>TSPQ</u>     | 2 | 0 | 2 |  |
| <u>TSPYL1</u>   | 2 | 0 | 2 |  |
| <u>TSPYL2</u>   | 2 | 0 | 2 |  |
| <u>TSPYL4</u>   | 2 | 0 | 2 |  |
| <u>TSSC1</u>    | 2 | 2 | 0 |  |
| <u>TTBK2</u>    | 2 | 2 | 0 |  |
| <u>TTC12</u>    | 2 | 2 | 0 |  |
| <u>TTC18</u>    | 2 | 2 | 0 |  |
| <u>TTC22</u>    | 2 | 2 | 0 |  |
| <u>TTC28</u>    | 2 | 2 | 0 |  |
| <u>TTC37</u>    | 2 | 0 | 2 |  |
| <u>TTLL5</u>    | 2 | 2 | 0 |  |

|               |   |   |   |  |
|---------------|---|---|---|--|
| <u>TULP2</u>  | 2 | 2 | 0 |  |
| <u>TWF1</u>   | 2 | 2 | 0 |  |
| <u>TXLNA</u>  | 2 | 0 | 2 |  |
| <u>UBA52</u>  | 2 | 0 | 2 |  |
| <u>UBA7</u>   | 2 | 2 | 0 |  |
| <u>UBAC1</u>  | 2 | 0 | 2 |  |
| <u>UBE2D1</u> | 2 | 2 | 0 |  |
| <u>UBE2D2</u> | 2 | 0 | 2 |  |
| <u>UBE2V2</u> | 2 | 0 | 2 |  |
| <u>UBL4A</u>  | 2 | 0 | 2 |  |
| <u>UBL5</u>   | 2 | 0 | 2 |  |
| <u>UBN1</u>   | 2 | 2 | 0 |  |
| <u>UBOX5</u>  | 2 | 2 | 0 |  |
| <u>UBQLN2</u> | 2 | 0 | 2 |  |
| <u>UBR4</u>   | 2 | 2 | 0 |  |
| <u>UBXN2B</u> | 2 | 0 | 2 |  |
| <u>UCK2</u>   | 2 | 2 | 0 |  |
| <u>UCP1</u>   | 2 | 2 | 0 |  |
| <u>UGDH</u>   | 2 | 2 | 0 |  |
| <u>UNC5C</u>  | 2 | 2 | 0 |  |
| <u>UNC93A</u> | 2 | 2 | 0 |  |
| <u>UPF3B</u>  | 2 | 0 | 2 |  |
| <u>UPK3B</u>  | 2 | 0 | 2 |  |
| <u>UOCR11</u> | 2 | 0 | 2 |  |
| <u>URB1</u>   | 2 | 2 | 0 |  |
| <u>URB2</u>   | 2 | 0 | 2 |  |
| <u>USP27X</u> | 2 | 2 | 0 |  |
| <u>USP29</u>  | 2 | 2 | 0 |  |
| <u>USP32</u>  | 2 | 2 | 0 |  |
| <u>USP6NL</u> | 2 | 0 | 2 |  |
| <u>USP7</u>   | 2 | 2 | 0 |  |
| <u>UTP14C</u> | 2 | 0 | 2 |  |
| <u>UTP20</u>  | 2 | 2 | 0 |  |
| <u>UTP6</u>   | 2 | 0 | 2 |  |
| <u>UTS2</u>   | 2 | 2 | 0 |  |
| <u>VAC14</u>  | 2 | 2 | 0 |  |
| <u>VAMP2</u>  | 2 | 2 | 0 |  |
| <u>VAMP7</u>  | 2 | 0 | 2 |  |
| <u>VANGL1</u> | 2 | 0 | 2 |  |
| <u>VAV2</u>   | 2 | 2 | 0 |  |
| <u>VBP1</u>   | 2 | 0 | 2 |  |
| <u>VEGFC</u>  | 2 | 2 | 0 |  |
| <u>VHL</u>    | 2 | 2 | 0 |  |
| <u>VIM</u>    | 2 | 0 | 2 |  |
| <u>VIPR2</u>  | 2 | 2 | 0 |  |
| <u>VPS13B</u> | 2 | 2 | 0 |  |
| <u>VPS28</u>  | 2 | 2 | 0 |  |
| <u>VPS37C</u> | 2 | 2 | 0 |  |

|                |   |   |   |  |
|----------------|---|---|---|--|
| <u>VPS53</u>   | 2 | 2 | 0 |  |
| <u>VSTM4</u>   | 2 | 2 | 0 |  |
| <u>VSX1</u>    | 2 | 2 | 0 |  |
| <u>WARS2</u>   | 2 | 2 | 0 |  |
| <u>WASF2</u>   | 2 | 2 | 0 |  |
| <u>WDR11</u>   | 2 | 0 | 2 |  |
| <u>WDR12</u>   | 2 | 0 | 2 |  |
| <u>WDR3</u>    | 2 | 0 | 2 |  |
| <u>WDR4</u>    | 2 | 0 | 2 |  |
| <u>WDR61</u>   | 2 | 0 | 2 |  |
| <u>WDR7</u>    | 2 | 2 | 0 |  |
| <u>WFDC2</u>   | 2 | 2 | 0 |  |
| <u>WIF1</u>    | 2 | 2 | 0 |  |
| <u>WNK1</u>    | 2 | 2 | 0 |  |
| <u>WNT1</u>    | 2 | 2 | 0 |  |
| <u>WNT2B</u>   | 2 | 2 | 0 |  |
| <u>WNT5A</u>   | 2 | 0 | 2 |  |
| <u>WNT7A</u>   | 2 | 2 | 0 |  |
| <u>WRNIP1</u>  | 2 | 2 | 0 |  |
| <u>WT1</u>     | 2 | 2 | 0 |  |
| <u>WWC3</u>    | 2 | 2 | 0 |  |
| <u>XAB2</u>    | 2 | 2 | 0 |  |
| <u>XPNPEP3</u> | 2 | 2 | 0 |  |
| <u>XPO4</u>    | 2 | 2 | 0 |  |
| <u>XPOT</u>    | 2 | 0 | 2 |  |
| <u>YEATS4</u>  | 2 | 0 | 2 |  |
| <u>YES1</u>    | 2 | 2 | 0 |  |
| <u>YKT6</u>    | 2 | 0 | 2 |  |
| <u>YTHDC2</u>  | 2 | 2 | 0 |  |
| <u>YTHDF1</u>  | 2 | 0 | 2 |  |
| <u>YWHAZ</u>   | 2 | 2 | 0 |  |
| <u>ZBBX</u>    | 2 | 2 | 0 |  |
| <u>ZBED2</u>   | 2 | 0 | 2 |  |
| <u>ZBTB1</u>   | 2 | 2 | 0 |  |
| <u>ZBTB16</u>  | 2 | 0 | 2 |  |
| <u>ZBTB17</u>  | 2 | 2 | 0 |  |
| <u>ZBTB40</u>  | 2 | 2 | 0 |  |
| <u>ZBTB44</u>  | 2 | 2 | 0 |  |
| <u>ZBTB6</u>   | 2 | 2 | 0 |  |
| <u>ZBTB7A</u>  | 2 | 2 | 0 |  |
| <u>ZC3H15</u>  | 2 | 2 | 0 |  |
| <u>ZC3H7B</u>  | 2 | 2 | 0 |  |
| <u>ZCCHC10</u> | 2 | 0 | 2 |  |
| <u>ZCCHC11</u> | 2 | 2 | 0 |  |
| <u>ZCCHC24</u> | 2 | 2 | 0 |  |
| <u>ZCWPW1</u>  | 2 | 2 | 0 |  |
| <u>ZDHHC7</u>  | 2 | 0 | 2 |  |
| <u>ZEB1</u>    | 2 | 2 | 0 |  |

|          |   |   |   |  |
|----------|---|---|---|--|
| ZER1     | 2 | 2 | 0 |  |
| ZFH3     | 2 | 2 | 0 |  |
| ZMAT3    | 2 | 0 | 2 |  |
| ZMYM3    | 2 | 2 | 0 |  |
| ZMYND10  | 2 | 2 | 0 |  |
| ZNF10    | 2 | 2 | 0 |  |
| ZNF137P  | 2 | 2 | 0 |  |
| ZNF14    | 2 | 0 | 2 |  |
| ZNF141   | 2 | 2 | 0 |  |
| ZNF175   | 2 | 0 | 2 |  |
| ZNF177   | 2 | 2 | 0 |  |
| ZNF180   | 2 | 2 | 0 |  |
| ZNF204P  | 2 | 2 | 0 |  |
| ZNF219   | 2 | 0 | 2 |  |
| ZNF223   | 2 | 2 | 0 |  |
| ZNF224   | 2 | 2 | 0 |  |
| ZNF259   | 2 | 0 | 2 |  |
| ZNF259P1 | 2 | 2 | 0 |  |
| ZNF273   | 2 | 2 | 0 |  |
| ZNF280A  | 2 | 2 | 0 |  |
| ZNF280B  | 2 | 2 | 0 |  |
| ZNF287   | 2 | 2 | 0 |  |
| ZNF292   | 2 | 2 | 0 |  |
| ZNF329   | 2 | 2 | 0 |  |
| ZNF335   | 2 | 2 | 0 |  |
| ZNF365   | 2 | 2 | 0 |  |
| ZNF44    | 2 | 2 | 0 |  |
| ZNF442   | 2 | 2 | 0 |  |
| ZNF460   | 2 | 2 | 0 |  |
| ZNF484   | 2 | 2 | 0 |  |
| ZNF518A  | 2 | 2 | 0 |  |
| ZNF536   | 2 | 2 | 0 |  |
| ZNF562   | 2 | 0 | 2 |  |
| ZNF614   | 2 | 2 | 0 |  |
| ZNF638   | 2 | 0 | 2 |  |
| ZNF643   | 2 | 2 | 0 |  |
| ZNF654   | 2 | 2 | 0 |  |
| ZNF667   | 2 | 2 | 0 |  |
| ZNF672   | 2 | 2 | 0 |  |
| ZNF682   | 2 | 2 | 0 |  |
| ZNF721   | 2 | 0 | 2 |  |
| ZNF749   | 2 | 2 | 0 |  |
| ZNF750   | 2 | 2 | 0 |  |
| ZNF79    | 2 | 2 | 0 |  |
| ZNF814   | 2 | 2 | 0 |  |
| ZNF816   | 2 | 2 | 0 |  |
| ZNF84    | 2 | 0 | 2 |  |
| ZNHIT6   | 2 | 0 | 2 |  |

|         |   |   |   |  |
|---------|---|---|---|--|
| ZP2     | 2 | 2 | 0 |  |
| ZSCAN5A | 2 | 2 | 0 |  |
| ZXDB    | 2 | 2 | 0 |  |
| ZZZ3    | 2 | 2 | 0 |  |

### Complex 3

#### mRNA based prediction result

| Pa    | Pi    | DownRegulation  | Pa    | Pi    | UpRegulation   |
|-------|-------|-----------------|-------|-------|----------------|
| 0.739 | 0.052 | <u>TRAF5</u>    | 0.935 | 0.006 | <u>PGR</u>     |
| 0.656 | 0.037 | <u>CYP11A1</u>  | 0.932 | 0.008 | <u>TFF1</u>    |
| 0.677 | 0.107 | <u>TPM1</u>     | 0.774 | 0.006 | <u>CYP19A1</u> |
| 0.629 | 0.109 | <u>ADORA2B</u>  | 0.711 | 0.003 | <u>RARG</u>    |
| 0.629 | 0.109 | <u>CDCA4</u>    | 0.670 | 0.084 | <u>SFRP1</u>   |
| 0.629 | 0.109 | <u>CENPJ</u>    | 0.587 | 0.005 | <u>CYP26A1</u> |
| 0.629 | 0.109 | <u>DNAJC9</u>   | 0.571 | 0.030 | <u>COX5B</u>   |
| 0.629 | 0.109 | <u>DONSON</u>   | 0.614 | 0.089 | <u>KRT6A</u>   |
| 0.629 | 0.109 | <u>HAUS8</u>    | 0.628 | 0.106 | <u>UGT2B15</u> |
| 0.629 | 0.109 | <u>MCMBP</u>    | 0.629 | 0.109 | <u>PFKFB2</u>  |
| 0.629 | 0.109 | <u>NUP155</u>   | 0.629 | 0.109 | <u>SH3BGRL</u> |
| 0.629 | 0.109 | <u>PARP2</u>    | 0.629 | 0.109 | <u>TRIM13</u>  |
| 0.629 | 0.109 | <u>RMI1</u>     | 0.615 | 0.095 | <u>SOLE</u>    |
| 0.629 | 0.109 | <u>SCARA3</u>   | 0.611 | 0.140 | <u>GFRA1</u>   |
| 0.629 | 0.109 | <u>SLC16A14</u> | 0.516 | 0.059 | <u>PSMD6</u>   |
| 0.629 | 0.109 | <u>SUV39H2</u>  | 0.548 | 0.092 | <u>CALM1</u>   |
| 0.606 | 0.124 | <u>GSS</u>      | 0.566 | 0.129 | <u>ST3GAL1</u> |
| 0.595 | 0.131 | <u>RPRM</u>     | 0.542 | 0.125 | <u>CYTH1</u>   |
| 0.564 | 0.116 | <u>CXCR7</u>    | 0.529 | 0.137 | <u>CACNG4</u>  |
| 0.543 | 0.107 | <u>ABCC5</u>    | 0.529 | 0.137 | <u>CHRNE</u>   |
| 0.536 | 0.115 | <u>TNIK</u>     | 0.519 | 0.128 | <u>PTGER4</u>  |
| 0.546 | 0.139 | <u>MFAP4</u>    | 0.546 | 0.157 | <u>ALDOA</u>   |
| 0.522 | 0.118 | <u>TBL1XR1</u>  | 0.537 | 0.163 | <u>HIVEP1</u>  |
| 0.543 | 0.162 | <u>PLEC</u>     | 0.505 | 0.152 | <u>FADS1</u>   |
| 0.504 | 0.139 | <u>NSF</u>      | 0.502 | 0.154 | <u>EXOSC4</u>  |
| 0.537 | 0.172 | <u>ERCC2</u>    |       |       |                |
| 0.534 | 0.193 | <u>CXCL2</u>    |       |       |                |
| 0.507 | 0.191 | <u>CAPRIN1</u>  |       |       |                |
| 0.538 | 0.226 | <u>TBC1D9</u>   |       |       |                |

#### Protein based prediction result

| Pa    | Pi    | DownRegulation | Pa    | Pi    | UpRegulation  |
|-------|-------|----------------|-------|-------|---------------|
| 0.769 | 0.005 | <u>IFNG</u>    | 0.807 | 0.004 | <u>CYP3A4</u> |
| 0.519 | 0.145 | <u>VIM</u>     | 0.804 | 0.005 | <u>CYP3A7</u> |
| 0.528 | 0.186 | <u>PPARA</u>   | 0.758 | 0.003 | <u>CYP2B6</u> |
|       |       |                | 0.561 | 0.122 | <u>CD83</u>   |

#### MCF7 based prediction result

| Pa    | Pi    | DownRegulation | Pa    | Pi    | UpRegulation |
|-------|-------|----------------|-------|-------|--------------|
| 0.621 | 0.026 | <u>BBS4</u>    | 0.687 | 0.025 | <u>STRN</u>  |

|       |       |               |       |       |                 |
|-------|-------|---------------|-------|-------|-----------------|
| 0.589 | 0.037 | <u>MRPL34</u> | 0.694 | 0.035 | <u>CDKN1B</u>   |
| 0.620 | 0.088 | <u>FOXMI</u>  | 0.699 | 0.042 | <u>C11orf68</u> |
| 0.536 | 0.046 | <u>ACVR2B</u> | 0.667 | 0.051 | <u>ZNF672</u>   |
| 0.536 | 0.046 | <u>BID</u>    | 0.651 | 0.119 | <u>CLDN9</u>    |
| 0.536 | 0.046 | <u>ERGIC2</u> | 0.617 | 0.087 | <u>KIAA0430</u> |
| 0.517 | 0.033 | <u>MREG</u>   | 0.628 | 0.109 | <u>CLCF1</u>    |
| 0.582 | 0.101 | <u>SBF1</u>   | 0.542 | 0.026 | <u>PHLPP1</u>   |
| 0.532 | 0.054 | <u>H2AFJ</u>  | 0.557 | 0.051 | <u>SCAND2P</u>  |
| 0.537 | 0.097 | <u>SFN</u>    | 0.519 | 0.022 | <u>ANGEL2</u>   |
| 0.518 | 0.117 | <u>SUCO</u>   | 0.602 | 0.108 | <u>BIN1</u>     |
|       |       |               | 0.536 | 0.046 | <u>ALAD</u>     |
|       |       |               | 0.536 | 0.046 | <u>CLEC16A</u>  |
|       |       |               | 0.536 | 0.046 | <u>FBXL18</u>   |
|       |       |               | 0.536 | 0.046 | <u>ZC2HC1A</u>  |
|       |       |               | 0.532 | 0.046 | <u>ZNF200</u>   |
|       |       |               | 0.545 | 0.063 | <u>RAB3A</u>    |
|       |       |               | 0.510 | 0.029 | <u>MTUS1</u>    |
|       |       |               | 0.510 | 0.031 | <u>MARCH8</u>   |
|       |       |               | 0.510 | 0.031 | <u>WIP1</u>     |
|       |       |               | 0.551 | 0.076 | <u>STX3</u>     |
|       |       |               | 0.570 | 0.101 | <u>RANGAP1</u>  |
|       |       |               | 0.508 | 0.060 | <u>MINOS1P1</u> |
|       |       |               | 0.556 | 0.109 | <u>FOXC1</u>    |
|       |       |               | 0.528 | 0.084 | <u>CBR3</u>     |
|       |       |               | 0.511 | 0.072 | <u>PIK3IP1</u>  |
|       |       |               | 0.517 | 0.083 | <u>LYPD3</u>    |
|       |       |               | 0.508 | 0.075 | <u>GCLC</u>     |
|       |       |               | 0.553 | 0.120 | <u>KIAA0232</u> |
|       |       |               | 0.518 | 0.099 | <u>TRIM23</u>   |
|       |       |               | 0.502 | 0.117 | <u>PIGA</u>     |

#### VCAP\_6h based prediction result

| Pa    | Pi    | DownRegulation | Pa    | Pi    | UpRegulation    |
|-------|-------|----------------|-------|-------|-----------------|
| 0.995 | 0.001 | <u>SIN3B</u>   | 0.997 | 0.003 | <u>OXSRI</u>    |
| 0.996 | 0.004 | <u>TUBB6</u>   | 0.996 | 0.003 | <u>PIK3R3</u>   |
| 0.768 | 0.043 | <u>ZNF221</u>  | 0.996 | 0.003 | <u>AMDHD2</u>   |
| 0.687 | 0.027 | <u>HP</u>      | 0.506 | 0.040 | <u>ABCF3</u>    |
| 0.581 | 0.155 | <u>CETP</u>    | 0.547 | 0.089 | <u>CBR3</u>     |
| 0.540 | 0.129 | <u>OXT</u>     | 0.536 | 0.180 | <u>C1ORF216</u> |
| 0.519 | 0.169 | <u>NUBP1</u>   | 0.507 | 0.158 | <u>BABAM1</u>   |

#### VCAP\_24h based prediction result

| Pa    | Pi    | DownRegulation | Pa    | Pi    | UpRegulation |
|-------|-------|----------------|-------|-------|--------------|
| 0.997 | 0.001 | <u>STX10</u>   | 0.997 | 0.001 | <u>EPHX2</u> |
| 0.997 | 0.001 | <u>TMEM2</u>   | 0.997 | 0.001 | <u>CLDN7</u> |

|       |       |                |       |       |                   |
|-------|-------|----------------|-------|-------|-------------------|
| 0.997 | 0.001 | <u>FLAD1</u>   | 0.997 | 0.001 | <u>CLDN3</u>      |
| 0.996 | 0.001 | <u>ABCG1</u>   | 0.997 | 0.001 | <u>IGLV1-40</u>   |
| 0.996 | 0.002 | <u>LSM7</u>    | 0.997 | 0.001 | <u>C2</u>         |
| 0.997 | 0.002 | <u>TERF2IP</u> | 0.997 | 0.002 | <u>IGKV3-20</u>   |
| 0.996 | 0.002 | <u>EDF1</u>    | 0.997 | 0.002 | <u>CD7</u>        |
| 0.997 | 0.003 | <u>SMC3</u>    | 0.997 | 0.001 | <u>KIAA0664L3</u> |
| 0.997 | 0.003 | <u>SKIV2L</u>  | 0.997 | 0.002 | <u>COL6A3</u>     |
| 0.996 | 0.003 | <u>STK25</u>   | 0.997 | 0.002 | <u>TRAT1</u>      |
| 0.996 | 0.003 | <u>CSNK1A1</u> | 0.997 | 0.002 | <u>SIVA1</u>      |
| 0.994 | 0.001 | <u>ODAM</u>    | 0.997 | 0.002 | <u>IGKV1-5</u>    |
| 0.994 | 0.001 | <u>GABPB1</u>  | 0.997 | 0.002 | <u>IL1R1</u>      |
| 0.996 | 0.003 | <u>PSME2</u>   | 0.997 | 0.002 | <u>TCF25</u>      |
| 0.993 | 0.001 | <u>PGRMC2</u>  | 0.997 | 0.002 | <u>SLC4A4</u>     |
| 0.555 | 0.110 | <u>COL9A3</u>  | 0.997 | 0.002 | <u>NR4A1</u>      |
| 0.525 | 0.106 | <u>CD96</u>    | 0.997 | 0.002 | <u>FBXL12</u>     |
|       |       |                | 0.996 | 0.002 | <u>ARPP21</u>     |
|       |       |                | 0.997 | 0.002 | <u>PLP2</u>       |
|       |       |                | 0.996 | 0.002 | <u>GLUL</u>       |
|       |       |                | 0.997 | 0.003 | <u>RPA2</u>       |
|       |       |                | 0.995 | 0.001 | <u>GMFB</u>       |
|       |       |                | 0.995 | 0.001 | <u>RPP14</u>      |
|       |       |                | 0.997 | 0.003 | <u>PRKAG2</u>     |
|       |       |                | 0.995 | 0.001 | <u>SPOCK2</u>     |
|       |       |                | 0.995 | 0.002 | <u>CD3G</u>       |
|       |       |                | 0.996 | 0.003 | <u>COL11A1</u>    |
|       |       |                | 0.996 | 0.003 | <u>PHKB</u>       |
|       |       |                | 0.992 | 0.001 | <u>PID1</u>       |
|       |       |                | 0.521 | 0.101 | <u>HOMER2</u>     |

### Combination prediction result

| <u>Name</u>   | <u>Overlap count</u> | <u>Up</u> | <u>Down</u> | <u>Result</u> |
|---------------|----------------------|-----------|-------------|---------------|
| <u>CBR3</u>   | 3                    | 3         | 0           |               |
| <u>CDCA4</u>  | 3                    | 2         | 1           |               |
| <u>CRBN</u>   | 3                    | 1         | 2           |               |
| <u>CTSB</u>   | 3                    | 1         | 2           |               |
| <u>DCAF17</u> | 3                    | 1         | 2           |               |
| <u>ELAVL1</u> | 3                    | 1         | 2           |               |
| <u>FKBP5</u>  | 3                    | 3         | 0           |               |
| <u>GALNT6</u> | 3                    | 1         | 2           |               |
| <u>PDZK1</u>  | 3                    | 1         | 2           |               |
| <u>RETSAT</u> | 3                    | 1         | 2           |               |
| <u>STK39</u>  | 3                    | 1         | 2           |               |
| <u>UBE2C</u>  | 3                    | 2         | 1           |               |
| <u>ZNF302</u> | 3                    | 2         | 1           |               |
| <u>AHCY</u>   | 2                    | 2         | 0           |               |
| <u>AK2</u>    | 2                    | 0         | 2           |               |

|                |   |   |   |  |
|----------------|---|---|---|--|
| <u>ANXA1</u>   | 2 | 0 | 2 |  |
| <u>C8ORF4</u>  | 2 | 2 | 0 |  |
| <u>CCR7</u>    | 2 | 0 | 2 |  |
| <u>CEACAM6</u> | 2 | 0 | 2 |  |
| <u>CEP70</u>   | 2 | 0 | 2 |  |
| <u>CETP</u>    | 2 | 0 | 2 |  |
| <u>CHFR</u>    | 2 | 2 | 0 |  |
| <u>CHIC2</u>   | 2 | 2 | 0 |  |
| <u>CHST15</u>  | 2 | 0 | 2 |  |
| <u>CLCN2</u>   | 2 | 0 | 2 |  |
| <u>CLIC3</u>   | 2 | 0 | 2 |  |
| <u>DENND5B</u> | 2 | 0 | 2 |  |
| <u>DIAPH2</u>  | 2 | 0 | 2 |  |
| <u>DLD</u>     | 2 | 2 | 0 |  |
| <u>DSE</u>     | 2 | 0 | 2 |  |
| <u>EHHADH</u>  | 2 | 0 | 2 |  |
| <u>ETAA1</u>   | 2 | 0 | 2 |  |
| <u>ETFB</u>    | 2 | 2 | 0 |  |
| <u>FBXL12</u>  | 2 | 2 | 0 |  |
| <u>FLAD1</u>   | 2 | 0 | 2 |  |
| <u>FNDC3B</u>  | 2 | 0 | 2 |  |
| <u>FOXD1</u>   | 2 | 2 | 0 |  |
| <u>GGH</u>     | 2 | 2 | 0 |  |
| <u>GJA1</u>    | 2 | 0 | 2 |  |
| <u>GNMT</u>    | 2 | 2 | 0 |  |
| <u>GPR19</u>   | 2 | 0 | 2 |  |
| <u>GPR20</u>   | 2 | 0 | 2 |  |
| <u>HIVEP1</u>  | 2 | 2 | 0 |  |
| <u>HMOX1</u>   | 2 | 2 | 0 |  |
| <u>ID1</u>     | 2 | 2 | 0 |  |
| <u>IER3</u>    | 2 | 0 | 2 |  |
| <u>IFIT1</u>   | 2 | 2 | 0 |  |
| <u>IKBKAP</u>  | 2 | 0 | 2 |  |
| <u>ITGB8</u>   | 2 | 0 | 2 |  |
| <u>KLF11</u>   | 2 | 0 | 2 |  |
| <u>KRT3</u>    | 2 | 0 | 2 |  |
| <u>LAMTOR2</u> | 2 | 2 | 0 |  |
| <u>MAP3K5</u>  | 2 | 0 | 2 |  |
| <u>MAST4</u>   | 2 | 0 | 2 |  |
| <u>MCMBP</u>   | 2 | 0 | 2 |  |
| <u>MDM2</u>    | 2 | 0 | 2 |  |
| <u>MEAF6</u>   | 2 | 2 | 0 |  |
| <u>NOS2</u>    | 2 | 0 | 2 |  |
| <u>NR4A1</u>   | 2 | 2 | 0 |  |
| <u>ODF1</u>    | 2 | 0 | 2 |  |
| <u>PCMTD2</u>  | 2 | 0 | 2 |  |
| <u>PDK4</u>    | 2 | 0 | 2 |  |
| <u>PDS5B</u>   | 2 | 2 | 0 |  |

|                 |   |   |   |  |
|-----------------|---|---|---|--|
| <u>PIK3R3</u>   | 2 | 2 | 0 |  |
| <u>PLEC</u>     | 2 | 0 | 2 |  |
| <u>POLI</u>     | 2 | 0 | 2 |  |
| <u>PRDX6</u>    | 2 | 2 | 0 |  |
| <u>RARG</u>     | 2 | 2 | 0 |  |
| <u>RBM12</u>    | 2 | 0 | 2 |  |
| <u>REG1B</u>    | 2 | 0 | 2 |  |
| <u>ROBO4</u>    | 2 | 0 | 2 |  |
| <u>RPP14</u>    | 2 | 2 | 0 |  |
| <u>SECISBP2</u> | 2 | 0 | 2 |  |
| <u>SELL</u>     | 2 | 0 | 2 |  |
| <u>SH3D21</u>   | 2 | 0 | 2 |  |
| <u>SLC25A37</u> | 2 | 0 | 2 |  |
| <u>SLC4A8</u>   | 2 | 0 | 2 |  |
| <u>SLC6A4</u>   | 2 | 0 | 2 |  |
| <u>SPATA20</u>  | 2 | 2 | 0 |  |
| <u>SPOP</u>     | 2 | 2 | 0 |  |
| <u>SPR</u>      | 2 | 2 | 0 |  |
| <u>STK3</u>     | 2 | 2 | 0 |  |
| <u>SUV39H2</u>  | 2 | 0 | 2 |  |
| <u>TCF25</u>    | 2 | 2 | 0 |  |
| <u>TLR2</u>     | 2 | 0 | 2 |  |
| <u>TMPRSS2</u>  | 2 | 2 | 0 |  |
| <u>TOP1</u>     | 2 | 2 | 0 |  |
| <u>TPSB2</u>    | 2 | 0 | 2 |  |
| <u>TRIM13</u>   | 2 | 2 | 0 |  |
| <u>TSKU</u>     | 2 | 2 | 0 |  |
| <u>TSPAN5</u>   | 2 | 0 | 2 |  |
| <u>VAV3</u>     | 2 | 0 | 2 |  |
| <u>VIM</u>      | 2 | 0 | 2 |  |
| <u>WISP2</u>    | 2 | 2 | 0 |  |
| ZBTB39          | 2 | 0 | 2 |  |
| <u>ZFP30</u>    | 2 | 0 | 2 |  |

## Complex 4

### mRNA based prediction result

| Pa    | Pi    | DownRegulation  | Pa    | Pi    | UpRegulation   |
|-------|-------|-----------------|-------|-------|----------------|
| 0.903 | 0.001 | <u>CYP2S1</u>   | 0.707 | 0.077 | <u>SFRP1</u>   |
| 0.795 | 0.030 | <u>NSF</u>      | 0.567 | 0.107 | <u>SOLE</u>    |
| 0.696 | 0.067 | <u>TRAF5</u>    | 0.583 | 0.123 | <u>PFKFB2</u>  |
| 0.625 | 0.132 | <u>TPM1</u>     | 0.583 | 0.123 | <u>SH3BGRL</u> |
| 0.558 | 0.096 | <u>ABCC5</u>    | 0.583 | 0.123 | <u>TRIM13</u>  |
| 0.583 | 0.123 | <u>ADORA2B</u>  | 0.508 | 0.118 | <u>CALM1</u>   |
| 0.583 | 0.123 | <u>CDCA4</u>    | 0.525 | 0.187 | <u>UGT2B15</u> |
| 0.583 | 0.123 | <u>CENPJ</u>    |       |       |                |
| 0.583 | 0.123 | <u>DNAJC9</u>   |       |       |                |
| 0.583 | 0.123 | <u>DONSON</u>   |       |       |                |
| 0.583 | 0.123 | <u>HAUS8</u>    |       |       |                |
| 0.583 | 0.123 | <u>MCMBP</u>    |       |       |                |
| 0.583 | 0.123 | <u>NUP155</u>   |       |       |                |
| 0.583 | 0.123 | <u>PARP2</u>    |       |       |                |
| 0.583 | 0.123 | <u>RMI1</u>     |       |       |                |
| 0.583 | 0.123 | <u>SCARA3</u>   |       |       |                |
| 0.583 | 0.123 | <u>SLC16A14</u> |       |       |                |
| 0.583 | 0.123 | <u>SUV39H2</u>  |       |       |                |
| 0.562 | 0.145 | <u>GSS</u>      |       |       |                |

### Protein based prediction result

| Pa    | Pi    | DownRegulation     | Pa    | Pi    | UpRegulation |
|-------|-------|--------------------|-------|-------|--------------|
| 0.859 | 0.001 | <u>PR0.859)KCA</u> | 0.585 | 0.103 | <u>CD83</u>  |

### MCF7 based prediction result

| Pa    | Pi    | DownRegulation | Pa    | Pi    | UpRegulation    |
|-------|-------|----------------|-------|-------|-----------------|
| 0.562 | 0.042 | <u>BBS4</u>    | 0.897 | 0.010 | <u>LPIN1</u>    |
| 0.505 | 0.095 | <u>MRPL34</u>  | 0.870 | 0.015 | <u>BNIP3L</u>   |
| 0.501 | 0.158 | <u>SBF1</u>    | 0.720 | 0.004 | <u>MAFB</u>     |
|       |       |                | 0.687 | 0.036 | <u>PLA2G3</u>   |
|       |       |                | 0.629 | 0.046 | <u>KLHL24</u>   |
|       |       |                | 0.628 | 0.046 | <u>STRN</u>     |
|       |       |                | 0.635 | 0.059 | <u>CDKN1B</u>   |
|       |       |                | 0.598 | 0.056 | <u>SOLE</u>     |
|       |       |                | 0.581 | 0.073 | <u>HMGCS1</u>   |
|       |       |                | 0.600 | 0.094 | <u>KIAA0430</u> |
|       |       |                | 0.581 | 0.076 | <u>CCNG2</u>    |
|       |       |                | 0.532 | 0.039 | <u>EGR3</u>     |
|       |       |                | 0.542 | 0.062 | <u>ALDOC</u>    |

|  |       |       |                 |
|--|-------|-------|-----------------|
|  | 0.565 | 0.086 | <u>C11orf68</u> |
|  | 0.568 | 0.094 | <u>ZNF672</u>   |
|  | 0.510 | 0.038 | <u>SPRED2</u>   |
|  | 0.616 | 0.149 | <u>CLDN9</u>    |
|  | 0.511 | 0.068 | <u>WIP1</u>     |
|  | 0.501 | 0.060 | <u>EIF2AK3</u>  |

### VCAP\_6h based prediction result

| Pa    | Pi    | DownRegulation  | Pa    | Pi    | UpRegulation    |
|-------|-------|-----------------|-------|-------|-----------------|
| 0.991 | 0.003 | <u>PPAN</u>     | 0.990 | 0.004 | <u>ACADL</u>    |
| 0.990 | 0.003 | <u>DBN1</u>     | 0.989 | 0.004 | <u>FBXO21</u>   |
| 0.990 | 0.004 | <u>WIZ</u>      | 0.988 | 0.004 | <u>ETNK2</u>    |
| 0.988 | 0.005 | <u>SOX4</u>     | 0.986 | 0.003 | <u>KCTD9</u>    |
| 0.987 | 0.004 | <u>NDUFA10</u>  | 0.987 | 0.004 | <u>CCRL1</u>    |
| 0.988 | 0.005 | <u>MLL4</u>     | 0.986 | 0.005 | <u>MTFR1</u>    |
| 0.987 | 0.005 | <u>CIZ1</u>     | 0.985 | 0.003 | <u>SUMO2</u>    |
| 0.987 | 0.004 | <u>ARMC6</u>    | 0.985 | 0.004 | <u>ECM2</u>     |
| 0.987 | 0.004 | <u>SCAMP1</u>   | 0.984 | 0.004 | <u>GPR19</u>    |
| 0.987 | 0.004 | <u>TMEM97</u>   | 0.984 | 0.004 | <u>GMEB2</u>    |
| 0.987 | 0.004 | <u>PEBP1</u>    | 0.983 | 0.004 | <u>DERL1</u>    |
| 0.984 | 0.002 | <u>KLHL21</u>   | 0.983 | 0.005 | <u>APBA2</u>    |
| 0.985 | 0.003 | <u>CGREF1</u>   | 0.983 | 0.004 | <u>FZD5</u>     |
| 0.986 | 0.005 | <u>RAD9A</u>    | 0.983 | 0.005 | <u>DYNC1I1</u>  |
| 0.984 | 0.005 | <u>PHGDH</u>    | 0.981 | 0.003 | <u>MTO1</u>     |
| 0.984 | 0.005 | <u>MRPS27</u>   | 0.982 | 0.004 | <u>AIP</u>      |
| 0.982 | 0.003 | <u>PTGER2</u>   | 0.981 | 0.004 | <u>YWHAQ</u>    |
| 0.983 | 0.004 | <u>PKN1</u>     | 0.982 | 0.005 | <u>CARD9</u>    |
| 0.983 | 0.004 | <u>ZDHHC4</u>   | 0.981 | 0.004 | <u>NFE2L1</u>   |
| 0.981 | 0.003 | <u>INO80B</u>   | 0.981 | 0.004 | <u>PGM3</u>     |
| 0.982 | 0.004 | <u>UPF3A</u>    | 0.981 | 0.004 | <u>DNAJA2</u>   |
| 0.982 | 0.004 | <u>ATP13A1</u>  | 0.981 | 0.005 | <u>ARMCX3</u>   |
| 0.982 | 0.004 | <u>PTPN2</u>    | 0.981 | 0.005 | <u>TRAPPC6A</u> |
| 0.980 | 0.004 | <u>EPHB2</u>    | 0.981 | 0.005 | <u>SNAP23</u>   |
| 0.981 | 0.005 | <u>AKAP17A</u>  | 0.980 | 0.005 | <u>GSDMB</u>    |
| 0.980 | 0.004 | <u>BBX</u>      | 0.980 | 0.005 | <u>SOCS2</u>    |
| 0.981 | 0.004 | <u>CNPPD1</u>   | 0.980 | 0.005 | <u>ARF6</u>     |
| 0.980 | 0.004 | <u>TNFSF13</u>  | 0.978 | 0.003 | <u>SLC38A2</u>  |
| 0.980 | 0.005 | <u>TECR</u>     | 0.978 | 0.004 | <u>RAP1B</u>    |
| 0.980 | 0.004 | <u>ATAD3A</u>   | 0.979 | 0.004 | <u>TYROBP</u>   |
| 0.980 | 0.004 | <u>MAGED1</u>   | 0.979 | 0.005 | <u>LPP</u>      |
| 0.980 | 0.004 | <u>MPST</u>     | 0.978 | 0.005 | <u>IPO13</u>    |
| 0.978 | 0.003 | <u>MGC12488</u> | 0.979 | 0.005 | <u>SLCO2A1</u>  |
| 0.978 | 0.003 | <u>LZTFL1</u>   | 0.978 | 0.005 | <u>NCAPD2</u>   |
| 0.979 | 0.004 | <u>B4GALT2</u>  | 0.978 | 0.004 | <u>SORD</u>     |
| 0.978 | 0.004 | <u>PTER</u>     | 0.977 | 0.004 | <u>CYB5R4</u>   |
| 0.979 | 0.004 | <u>LYRM4</u>    | 0.978 | 0.005 | <u>KLF9</u>     |

|       |       |                 |       |       |                 |
|-------|-------|-----------------|-------|-------|-----------------|
| 0.978 | 0.004 | <u>GORASP1</u>  | 0.978 | 0.004 | <u>UBE2H</u>    |
| 0.978 | 0.004 | <u>ALDH18A1</u> | 0.977 | 0.003 | <u>HERC2</u>    |
| 0.978 | 0.003 | <u>AMFR</u>     | 0.977 | 0.004 | <u>TMEM176B</u> |
| 0.978 | 0.004 | <u>IKBKB</u>    | 0.977 | 0.004 | <u>RTN1</u>     |
| 0.978 | 0.004 | <u>DNMT3B</u>   | 0.977 | 0.005 | <u>TPPP3</u>    |
| 0.978 | 0.005 | <u>KIAA0494</u> | 0.977 | 0.005 | <u>HSD17B6</u>  |
| 0.976 | 0.004 | <u>ATP1B3</u>   | 0.976 | 0.004 | <u>LIFR</u>     |
| 0.976 | 0.003 | <u>TUBG2</u>    | 0.977 | 0.005 | <u>MS4A4A</u>   |
| 0.977 | 0.005 | <u>TM7SF2</u>   | 0.976 | 0.004 | <u>KCTD15</u>   |
| 0.977 | 0.004 | <u>YIPF2</u>    | 0.976 | 0.004 | <u>ARAP3</u>    |
| 0.977 | 0.004 | <u>FUT7</u>     | 0.976 | 0.005 | <u>CORO2A</u>   |
| 0.976 | 0.005 | <u>SORBS3</u>   | 0.976 | 0.005 | <u>PEA15</u>    |
| 0.976 | 0.005 | <u>C14ORF1</u>  | 0.975 | 0.004 | <u>CST1</u>     |
| 0.974 | 0.003 | <u>NDP</u>      | 0.976 | 0.005 | <u>MORC3</u>    |
| 0.975 | 0.004 | <u>SNAPC2</u>   | 0.975 | 0.004 | <u>PTPN9</u>    |
| 0.975 | 0.004 | <u>LEPROT</u>   | 0.976 | 0.005 | <u>ANXA1</u>    |
| 0.975 | 0.004 | <u>PARP4</u>    | 0.975 | 0.004 | <u>SNAI2</u>    |
| 0.976 | 0.005 | <u>WSB1</u>     | 0.976 | 0.005 | <u>SMYD2</u>    |
| 0.976 | 0.005 | <u>MRPL24</u>   | 0.976 | 0.005 | <u>OAT</u>      |
| 0.975 | 0.005 | <u>LTBP3</u>    | 0.975 | 0.005 | <u>MOB3B</u>    |
| 0.973 | 0.003 | <u>BACH2</u>    | 0.976 | 0.005 | <u>MORF4L2</u>  |
| 0.974 | 0.004 | <u>ESRRG</u>    | 0.975 | 0.005 | <u>LAP3</u>     |
| 0.975 | 0.005 | <u>RABAC1</u>   | 0.975 | 0.005 | <u>EPS15</u>    |
| 0.974 | 0.004 | <u>PRRC2B</u>   | 0.975 | 0.005 | <u>STK17B</u>   |
| 0.974 | 0.004 | <u>MRPL17</u>   | 0.975 | 0.005 | <u>KIAA0930</u> |
| 0.974 | 0.005 | <u>ATP9A</u>    | 0.975 | 0.005 | <u>CDH5</u>     |
| 0.974 | 0.004 | <u>PWP2</u>     | 0.975 | 0.005 | <u>PDLIM1</u>   |
| 0.973 | 0.004 | <u>INPPL1</u>   | 0.977 | 0.008 | <u>MIOS</u>     |
| 0.973 | 0.005 | <u>RPL36</u>    | 0.974 | 0.004 | <u>RNF115</u>   |
| 0.973 | 0.005 | <u>NOLC1</u>    | 0.975 | 0.005 | <u>USP15</u>    |
| 0.971 | 0.003 | <u>GALNT10</u>  | 0.974 | 0.005 | <u>ANPEP</u>    |
| 0.970 | 0.003 | <u>ABCB8</u>    | 0.974 | 0.005 | <u>PPEF1</u>    |
| 0.970 | 0.003 | <u>EFNA3</u>    | 0.972 | 0.003 | <u>NDUFB11</u>  |
| 0.971 | 0.004 | <u>WDR46</u>    | 0.973 | 0.005 | <u>CAST</u>     |
| 0.972 | 0.005 | <u>MRPS31</u>   | 0.973 | 0.005 | <u>PHOX2A</u>   |
| 0.969 | 0.003 | <u>ADAM15</u>   | 0.973 | 0.005 | <u>CLEC7A</u>   |
| 0.971 | 0.005 | <u>LEPREL4</u>  | 0.973 | 0.004 | <u>GSK3B</u>    |
| 0.971 | 0.005 | <u>NAA15</u>    | 0.972 | 0.005 | <u>G3BP2</u>    |
| 0.969 | 0.003 | <u>MRPL52</u>   | 0.973 | 0.005 | <u>MNDA</u>     |
| 0.970 | 0.004 | <u>HMGA1</u>    | 0.973 | 0.005 | <u>MMP9</u>     |
| 0.970 | 0.004 | <u>RPL11</u>    | 0.972 | 0.005 | <u>RGS16</u>    |
| 0.970 | 0.004 | <u>BBC3</u>     | 0.972 | 0.004 | <u>CD2AP</u>    |
| 0.971 | 0.005 | <u>SMARCE1</u>  | 0.971 | 0.004 | <u>OLFML2A</u>  |
| 0.970 | 0.005 | <u>IP6K2</u>    | 0.971 | 0.004 | <u>NCAPD3</u>   |
| 0.970 | 0.004 | <u>RRNAD1</u>   | 0.971 | 0.005 | <u>FAM189A2</u> |
| 0.969 | 0.004 | <u>COX15</u>    | 0.971 | 0.005 | <u>CNOT8</u>    |
| 0.970 | 0.005 | <u>CDC37</u>    | 0.971 | 0.005 | <u>TRAPPC2</u>  |

|       |       |                 |       |       |                     |
|-------|-------|-----------------|-------|-------|---------------------|
| 0.969 | 0.003 | <u>ECM2</u>     | 0.971 | 0.005 | <u>RTF1</u>         |
| 0.969 | 0.005 | <u>BRD2</u>     | 0.971 | 0.005 | <u>PALLD</u>        |
| 0.968 | 0.004 | <u>TLE3</u>     | 0.971 | 0.005 | <u>ALKBH1</u>       |
| 0.968 | 0.005 | <u>SREBF1</u>   | 0.971 | 0.005 | <u>ZNF394</u>       |
| 0.968 | 0.005 | <u>GALNT11</u>  | 0.970 | 0.005 | <u>GPNMB</u>        |
| 0.968 | 0.005 | <u>RANGAP1</u>  | 0.970 | 0.005 | <u>TMEM204</u>      |
| 0.967 | 0.005 | <u>IMPDH2</u>   | 0.970 | 0.004 | <u>CREB5</u>        |
| 0.967 | 0.004 | <u>RUFY2</u>    | 0.970 | 0.005 | <u>CTRC</u>         |
| 0.967 | 0.005 | <u>OAS1</u>     | 0.969 | 0.004 | <u>UBE2G1</u>       |
| 0.966 | 0.004 | <u>CAD</u>      | 0.970 | 0.005 | <u>CPEB3</u>        |
| 0.966 | 0.004 | <u>C9ORF91</u>  | 0.970 | 0.005 | <u>FGD6</u>         |
| 0.965 | 0.003 | <u>RPAP1</u>    | 0.970 | 0.005 | <u>RBX1</u>         |
| 0.965 | 0.004 | <u>TRAF3</u>    | 0.970 | 0.005 | <u>FOXF2</u>        |
| 0.968 | 0.007 | <u>FAM162A</u>  | 0.968 | 0.003 | <u>ST18</u>         |
| 0.966 | 0.005 | <u>KIAA0368</u> | 0.969 | 0.005 | <u>FAM127B</u>      |
| 0.966 | 0.005 | <u>YIF1A</u>    | 0.969 | 0.005 | <u>PSMC2</u>        |
| 0.965 | 0.005 | <u>HTRA2</u>    | 0.968 | 0.004 | <u>SLC37A1</u>      |
| 0.965 | 0.005 | <u>U2AF1</u>    | 0.968 | 0.005 | <u>SMAP1</u>        |
| 0.964 | 0.004 | <u>RPH3AL</u>   | 0.969 | 0.005 | <u>PLA2G7</u>       |
| 0.965 | 0.005 | <u>PREP</u>     | 0.968 | 0.005 | <u>CFI</u>          |
| 0.965 | 0.005 | <u>GAR1</u>     | 0.968 | 0.005 | <u>IGSF6</u>        |
| 0.964 | 0.004 | <u>DNASE2</u>   | 0.968 | 0.005 | <u>IL10RA</u>       |
| 0.964 | 0.004 | <u>GDF2</u>     | 0.968 | 0.005 | <u>TOMM22</u>       |
| 0.962 | 0.003 | <u>APOBEC3F</u> | 0.966 | 0.002 | <u>FUBP3</u>        |
| 0.963 | 0.004 | <u>FAM134C</u>  | 0.967 | 0.005 | <u>LDB2</u>         |
| 0.963 | 0.004 | <u>PNPLA6</u>   | 0.967 | 0.005 | <u>C5ORF44</u>      |
| 0.963 | 0.004 | <u>SPP1</u>     | 0.967 | 0.005 | <u>RAPGEF5</u>      |
| 0.963 | 0.005 | <u>ALG3</u>     | 0.966 | 0.004 | <u>SALL2</u>        |
| 0.963 | 0.004 | <u>FAM30A</u>   | 0.969 | 0.007 | <u>BCL2L13</u>      |
| 0.967 | 0.008 | <u>MLEC</u>     | 0.972 | 0.011 | <u>EDEM3</u>        |
| 0.962 | 0.004 | <u>PEMT</u>     | 0.966 | 0.005 | <u>LOC100507397</u> |
| 0.962 | 0.005 | <u>SLC30A1</u>  | 0.965 | 0.004 | <u>NUP153</u>       |
| 0.962 | 0.004 | <u>FOXO4</u>    | 0.965 | 0.005 | <u>PRLH</u>         |
| 0.961 | 0.004 | <u>RPL6</u>     | 0.965 | 0.005 | <u>NEK2</u>         |
| 0.960 | 0.003 | <u>CES1P1</u>   | 0.965 | 0.005 | <u>DDX3X</u>        |
| 0.961 | 0.005 | <u>MECR</u>     | 0.964 | 0.004 | <u>CSRP2</u>        |
| 0.960 | 0.005 | <u>LEF1</u>     | 0.963 | 0.004 | <u>BNIP2</u>        |
| 0.960 | 0.004 | <u>PITRM1</u>   | 0.964 | 0.005 | <u>DDX19A</u>       |
| 0.962 | 0.006 | <u>PSD3</u>     | 0.964 | 0.005 | <u>CLEC4A</u>       |
| 0.961 | 0.006 | <u>DALRD3</u>   | 0.963 | 0.004 | <u>C18ORF8</u>      |
| 0.959 | 0.005 | <u>VCP</u>      | 0.961 | 0.004 | <u>ZNF189</u>       |
| 0.958 | 0.005 | <u>COL5A1</u>   | 0.967 | 0.010 | <u>CYB561</u>       |
| 0.959 | 0.006 | <u>PRKCSH</u>   | 0.961 | 0.005 | <u>PNOC</u>         |
| 0.958 | 0.005 | <u>TERF1</u>    | 0.961 | 0.005 | <u>INTS7</u>        |
| 0.958 | 0.005 | <u>EHMT2</u>    | 0.961 | 0.005 | <u>FGL2</u>         |
| 0.957 | 0.004 | <u>GMDS</u>     | 0.961 | 0.005 | <u>ZNF137P</u>      |
| 0.957 | 0.005 | <u>C9ORF40</u>  | 0.960 | 0.004 | <u>CHMP2B</u>       |

|       |       |                  |       |       |                 |
|-------|-------|------------------|-------|-------|-----------------|
| 0.954 | 0.003 | <u>TMEM214</u>   | 0.959 | 0.005 | <u>PTPRO</u>    |
| 0.959 | 0.008 | <u>RIC8A</u>     | 0.959 | 0.005 | <u>HNRNPC</u>   |
| 0.962 | 0.012 | <u>SRSF1</u>     | 0.959 | 0.005 | <u>TMEM176A</u> |
| 0.953 | 0.004 | <u>THADA</u>     | 0.959 | 0.005 | <u>COPS2</u>    |
| 0.954 | 0.005 | <u>POLD2</u>     | 0.959 | 0.005 | <u>CHN2</u>     |
| 0.952 | 0.003 | <u>RAB11FIP5</u> | 0.958 | 0.004 | <u>C1ORF115</u> |
| 0.952 | 0.006 | <u>TSEN34</u>    | 0.958 | 0.005 | <u>NDUFA6</u>   |
| 0.955 | 0.009 | <u>EXOSC10</u>   | 0.958 | 0.005 | <u>CREBL2</u>   |
| 0.952 | 0.007 | <u>SRSF11</u>    | 0.958 | 0.006 | <u>RAC3</u>     |
| 0.948 | 0.004 | <u>PDCD6IP</u>   | 0.959 | 0.006 | <u>TGM4</u>     |
| 0.948 | 0.005 | <u>ST7</u>       | 0.957 | 0.005 | <u>CES2</u>     |
| 0.947 | 0.006 | <u>NKTR</u>      | 0.957 | 0.005 | <u>C1ORF21</u>  |
| 0.945 | 0.005 | <u>EHD1</u>      | 0.957 | 0.004 | <u>UBE2D3</u>   |
| 0.944 | 0.004 | <u>OXSM</u>      | 0.957 | 0.005 | <u>PPP1R16B</u> |
| 0.944 | 0.004 | <u>ARHGEF1</u>   | 0.954 | 0.003 | <u>SNX10</u>    |
| 0.956 | 0.016 | <u>C21ORF33</u>  | 0.955 | 0.005 | <u>SUMO1</u>    |
| 0.943 | 0.005 | <u>KRR1</u>      | 0.954 | 0.005 | <u>WLS</u>      |
| 0.947 | 0.009 | <u>SRSF7</u>     | 0.954 | 0.005 | <u>KIAA1462</u> |
| 0.942 | 0.005 | <u>NIT2</u>      | 0.953 | 0.004 | <u>CDCP1</u>    |
| 0.942 | 0.005 | <u>METTL21D</u>  | 0.953 | 0.005 | <u>WARS</u>     |
| 0.943 | 0.008 | <u>TSPAN4</u>    | 0.953 | 0.005 | <u>SLC27A3</u>  |
| 0.953 | 0.018 | <u>RHEB</u>      | 0.952 | 0.005 | <u>CYTIP</u>    |
| 0.938 | 0.005 | <u>TLE6</u>      | 0.956 | 0.009 | <u>TM6SF1</u>   |
| 0.938 | 0.005 | <u>UBE2C</u>     | 0.956 | 0.010 | <u>ANAPC10</u>  |
| 0.934 | 0.004 | <u>SETD5</u>     | 0.954 | 0.008 | <u>CFD</u>      |
| 0.940 | 0.010 | <u>IP6K1</u>     | 0.956 | 0.010 | <u>USP10</u>    |
| 0.935 | 0.005 | <u>EIF3E</u>     | 0.951 | 0.005 | <u>SNX16</u>    |
| 0.934 | 0.004 | <u>CRYL1</u>     | 0.949 | 0.005 | <u>SEMG1</u>    |
| 0.939 | 0.009 | <u>GAA</u>       | 0.949 | 0.006 | <u>HYI</u>      |
| 0.937 | 0.008 | <u>C10ORF2</u>   | 0.952 | 0.009 | <u>WDR44</u>    |
| 0.939 | 0.013 | <u>C12ORF10</u>  | 0.949 | 0.006 | <u>TBPL1</u>    |
| 0.934 | 0.010 | <u>H2BFS</u>     | 0.949 | 0.007 | <u>SLC5A6</u>   |
| 0.932 | 0.009 | <u>GORASP2</u>   | 0.945 | 0.004 | <u>SCGB1D2</u>  |
| 0.929 | 0.006 | <u>TBL3</u>      | 0.949 | 0.008 | <u>CCNH</u>     |
| 0.931 | 0.009 | <u>RUVBL2</u>    | 0.947 | 0.008 | <u>PCGF3</u>    |
| 0.929 | 0.008 | <u>ILK</u>       | 0.945 | 0.006 | <u>ELF2</u>     |
| 0.926 | 0.006 | <u>STRN4</u>     | 0.944 | 0.005 | <u>TRIM22</u>   |
| 0.924 | 0.005 | <u>AFG3L2</u>    | 0.943 | 0.004 | <u>PGAM2</u>    |
| 0.923 | 0.005 | <u>NPAS1</u>     | 0.943 | 0.005 | <u>SERPINI2</u> |
| 0.924 | 0.009 | <u>EEF1B2</u>    | 0.945 | 0.008 | <u>RANBP10</u>  |
| 0.919 | 0.004 | <u>NELF</u>      | 0.948 | 0.011 | <u>SH3BP5</u>   |
| 0.924 | 0.010 | <u>GPD1L</u>     | 0.942 | 0.005 | <u>HPSE</u>     |
| 0.925 | 0.012 | <u>CD151</u>     | 0.942 | 0.006 | <u>STAM</u>     |
| 0.921 | 0.008 | <u>SEC61A1</u>   | 0.940 | 0.005 | <u>NFKBIL1</u>  |
| 0.932 | 0.020 | <u>SH3GLB2</u>   | 0.943 | 0.008 | <u>ITGA8</u>    |
| 0.927 | 0.015 | <u>NHP2</u>      | 0.939 | 0.005 | <u>ITM2B</u>    |
| 0.925 | 0.013 | <u>DEAF1</u>     | 0.937 | 0.005 | <u>SEPT10</u>   |

|       |       |                 |       |       |                 |
|-------|-------|-----------------|-------|-------|-----------------|
| 0.920 | 0.009 | <u>COBRA1</u>   | 0.941 | 0.009 | <u>FAM198B</u>  |
| 0.919 | 0.008 | <u>LYPD1</u>    | 0.943 | 0.013 | <u>PRPF4B</u>   |
| 0.933 | 0.023 | <u>KAZN</u>     | 0.932 | 0.005 | <u>KCNJ8</u>    |
| 0.921 | 0.013 | <u>PPP3CB</u>   | 0.931 | 0.005 | <u>KATNB1</u>   |
| 0.919 | 0.012 | <u>UBE2M</u>    | 0.932 | 0.007 | <u>UBE2N</u>    |
| 0.917 | 0.011 | <u>AK2</u>      | 0.934 | 0.010 | <u>ZNF22</u>    |
| 0.915 | 0.013 | <u>ACTR2</u>    | 0.931 | 0.007 | <u>C4ORF41</u>  |
| 0.911 | 0.009 | <u>PPP1CA</u>   | 0.933 | 0.010 | <u>SLC4A4</u>   |
| 0.909 | 0.008 | <u>SRPRB</u>    | 0.930 | 0.007 | <u>CD93</u>     |
| 0.906 | 0.006 | <u>GNB5</u>     | 0.933 | 0.012 | <u>CPA2</u>     |
| 0.909 | 0.010 | <u>SDAD1</u>    | 0.931 | 0.012 | <u>SH3GLB1</u>  |
| 0.904 | 0.005 | <u>WDR48</u>    | 0.934 | 0.015 | <u>NEDD9</u>    |
| 0.901 | 0.004 | <u>ARMCX6</u>   | 0.922 | 0.006 | <u>APOLD1</u>   |
| 0.907 | 0.011 | <u>HEXIM1</u>   | 0.924 | 0.008 | <u>SPG11</u>    |
| 0.909 | 0.015 | <u>FBXO7</u>    | 0.926 | 0.011 | <u>MARK4</u>    |
| 0.900 | 0.005 | <u>LUC7L2</u>   | 0.920 | 0.005 | <u>GDF2</u>     |
| 0.906 | 0.012 | <u>HSD17B10</u> | 0.923 | 0.009 | <u>CSTF2T</u>   |
| 0.909 | 0.016 | <u>KIF2C</u>    | 0.923 | 0.009 | <u>BHLHB9</u>   |
| 0.901 | 0.013 | <u>FAM57A</u>   | 0.920 | 0.010 | <u>CAV1</u>     |
| 0.910 | 0.024 | <u>ATP6V0E1</u> | 0.921 | 0.012 | <u>FOXF1</u>    |
| 0.901 | 0.016 | <u>EEF1G</u>    | 0.923 | 0.015 | <u>CDH1</u>     |
| 0.892 | 0.007 | <u>SEC24A</u>   | 0.920 | 0.012 | <u>LRRC16A</u>  |
| 0.902 | 0.018 | <u>NGFRAP1</u>  | 0.920 | 0.013 | <u>FILIP1L</u>  |
| 0.899 | 0.018 | <u>C19ORF22</u> | 0.921 | 0.014 | <u>HNRNPD</u>   |
| 0.895 | 0.020 | <u>NDUFV1</u>   | 0.920 | 0.014 | <u>AOAH</u>     |
| 0.881 | 0.007 | <u>RPL35</u>    | 0.916 | 0.010 | <u>ATG5</u>     |
| 0.886 | 0.011 | <u>SAC3D1</u>   | 0.911 | 0.006 | <u>YWHAZ</u>    |
| 0.887 | 0.013 | <u>ZNF302</u>   | 0.919 | 0.015 | <u>UBR2</u>     |
| 0.897 | 0.025 | <u>SLC35E1</u>  | 0.909 | 0.008 | <u>VWA1</u>     |
| 0.883 | 0.015 | <u>RSAD1</u>    | 0.912 | 0.011 | <u>EDC3</u>     |
| 0.885 | 0.018 | <u>MLST8</u>    | 0.906 | 0.006 | <u>WDR45L</u>   |
| 0.877 | 0.010 | <u>RUFY1</u>    | 0.908 | 0.008 | <u>SPDEF</u>    |
| 0.898 | 0.032 | <u>RCC1</u>     | 0.907 | 0.009 | <u>LGI1</u>     |
| 0.881 | 0.018 | <u>CHD1L</u>    | 0.904 | 0.008 | <u>LPPR4</u>    |
| 0.882 | 0.019 | <u>DNPEP</u>    | 0.903 | 0.008 | <u>CREB3L1</u>  |
| 0.880 | 0.018 | <u>ATP5G1</u>   | 0.900 | 0.005 | <u>NIT1</u>     |
| 0.878 | 0.018 | <u>LSM4</u>     | 0.900 | 0.005 | <u>KIAA1324</u> |
| 0.877 | 0.021 | <u>FAM50A</u>   | 0.904 | 0.009 | <u>KAL1</u>     |
| 0.873 | 0.017 | <u>BANF1</u>    | 0.909 | 0.014 | <u>KRI1</u>     |
| 0.877 | 0.022 | <u>PLOD3</u>    | 0.907 | 0.015 | <u>GTSE1</u>    |
| 0.873 | 0.018 | <u>HSPBP1</u>   | 0.899 | 0.008 | <u>CD300C</u>   |
| 0.864 | 0.011 | <u>C2CD2</u>    | 0.900 | 0.010 | <u>OMD</u>      |
| 0.865 | 0.014 | <u>COX17</u>    | 0.898 | 0.009 | <u>EMCN</u>     |
| 0.866 | 0.020 | <u>KCTD3</u>    | 0.902 | 0.014 | <u>OR51E2</u>   |
| 0.867 | 0.028 | <u>TUFM</u>     | 0.898 | 0.010 | <u>ZMYM1</u>    |
| 0.844 | 0.005 | <u>KIAA0754</u> | 0.907 | 0.019 | <u>RAB9A</u>    |
| 0.859 | 0.020 | <u>PRMT1</u>    | 0.893 | 0.009 | <u>RAPGEF4</u>  |

|       |       |                  |       |       |                  |
|-------|-------|------------------|-------|-------|------------------|
| 0.846 | 0.016 | <u>BST2</u>      | 0.900 | 0.017 | <u>ESRRG</u>     |
| 0.846 | 0.017 | <u>TPX2</u>      | 0.899 | 0.015 | <u>CAB39L</u>    |
| 0.857 | 0.029 | <u>RNASEH1</u>   | 0.892 | 0.009 | <u>SLC33A1</u>   |
| 0.853 | 0.029 | <u>ARPC4</u>     | 0.896 | 0.013 | <u>APPBP2</u>    |
| 0.856 | 0.032 | <u>SMARCD2</u>   | 0.897 | 0.018 | <u>DLG2</u>      |
| 0.839 | 0.016 | <u>PRDX4</u>     | 0.903 | 0.025 | <u>CLPX</u>      |
| 0.834 | 0.013 | <u>PRAF2</u>     | 0.909 | 0.031 | ZNF318           |
| 0.840 | 0.020 | <u>PPT1</u>      | 0.894 | 0.019 | <u>UBXN4</u>     |
| 0.846 | 0.026 | <u>GOLGA2</u>    | 0.892 | 0.018 | <u>GNRH2</u>     |
| 0.842 | 0.025 | <u>SIGMAR1</u>   | 0.885 | 0.011 | <u>F11R</u>      |
| 0.840 | 0.024 | <u>FIBP</u>      | 0.878 | 0.005 | <u>CCNL1</u>     |
| 0.841 | 0.026 | <u>NME1</u>      | 0.888 | 0.016 | FAM188A          |
| 0.833 | 0.019 | <u>NIP7</u>      | 0.891 | 0.021 | <u>SEC23A</u>    |
| 0.835 | 0.022 | <u>PDSS2</u>     | 0.881 | 0.012 | <u>ITIH1</u>     |
| 0.844 | 0.050 | <u>MAP3K7</u>    | 0.876 | 0.008 | <u>ARL15</u>     |
| 0.823 | 0.035 | <u>MTHFD2</u>    | 0.890 | 0.022 | <u>ALDH5A1</u>   |
| 0.818 | 0.033 | <u>ENDOG</u>     | 0.885 | 0.018 | <u>UEVLD</u>     |
| 0.803 | 0.019 | <u>KPTN</u>      | 0.885 | 0.020 | <u>RBM12</u>     |
| 0.810 | 0.028 | <u>RPL15</u>     | 0.879 | 0.016 | <u>SEC24D</u>    |
| 0.811 | 0.029 | <u>UBE2V2</u>    | 0.878 | 0.018 | <u>ETFDH</u>     |
| 0.812 | 0.032 | <u>GPI</u>       | 0.875 | 0.015 | <u>PAQR3</u>     |
| 0.802 | 0.036 | <u>RNASEH2A</u>  | 0.873 | 0.016 | <u>CDK2</u>      |
| 0.811 | 0.048 | <u>CACNA1B</u>   | 0.872 | 0.015 | <u>HHEX</u>      |
| 0.803 | 0.040 | <u>PPP2R4</u>    | 0.870 | 0.013 | <u>STX4</u>      |
| 0.799 | 0.038 | <u>ARF5</u>      | 0.879 | 0.023 | <u>TOX4</u>      |
| 0.789 | 0.028 | C11ORF2          | 0.871 | 0.016 | <u>PIBF1</u>     |
| 0.807 | 0.047 | <u>BRD3</u>      | 0.876 | 0.022 | <u>CIAO1</u>     |
| 0.784 | 0.027 | <u>HIST1H2BF</u> | 0.869 | 0.016 | <u>APP</u>       |
| 0.797 | 0.042 | <u>CCT3</u>      | 0.869 | 0.015 | <u>LIN7C</u>     |
| 0.789 | 0.036 | <u>DNTTIP2</u>   | 0.872 | 0.020 | <u>CDH4</u>      |
| 0.806 | 0.054 | <u>U2AF2</u>     | 0.868 | 0.016 | <u>PPM1B</u>     |
| 0.799 | 0.048 | PEX10            | 0.866 | 0.017 | <u>NR2E1</u>     |
| 0.782 | 0.031 | <u>CELF1</u>     | 0.869 | 0.020 | <u>SERPINA1</u>  |
| 0.802 | 0.051 | <u>STAMPB</u>    | 0.869 | 0.021 | <u>UHRF1BP1L</u> |
| 0.767 | 0.022 | <u>SRM</u>       | 0.854 | 0.008 | <u>BMX</u>       |
| 0.780 | 0.035 | <u>TROAP</u>     | 0.860 | 0.017 | <u>NUP98</u>     |
| 0.796 | 0.051 | <u>NUP210</u>    | 0.855 | 0.012 | <u>GC</u>        |
| 0.775 | 0.032 | <u>GLT25D1</u>   | 0.867 | 0.025 | <u>AP1S2</u>     |
| 0.787 | 0.049 | <u>MAN1B1</u>    | 0.852 | 0.011 | <u>PWP1</u>      |
| 0.770 | 0.038 | <u>CDCA3</u>     | 0.865 | 0.025 | <u>HMX1</u>      |
| 0.762 | 0.032 | SKIV2L           | 0.858 | 0.018 | <u>CLEC1A</u>    |
| 0.756 | 0.027 | <u>MICU1</u>     | 0.858 | 0.021 | <u>CEP170</u>    |
| 0.783 | 0.053 | <u>TM9SF1</u>    | 0.863 | 0.028 | <u>MYO1B</u>     |
| 0.762 | 0.033 | <u>NCOA3</u>     | 0.850 | 0.017 | <u>HIPK1</u>     |
| 0.784 | 0.055 | <u>SNX6</u>      | 0.844 | 0.011 | <u>SERHL2</u>    |
| 0.778 | 0.052 | <u>SDCCAG3</u>   | 0.859 | 0.026 | C18ORF10         |
| 0.748 | 0.024 | <u>PSMG1</u>     | 0.851 | 0.020 | <u>F13A1</u>     |

|       |       |                 |       |       |                 |
|-------|-------|-----------------|-------|-------|-----------------|
| 0.775 | 0.052 | <u>CHEK2</u>    | 0.848 | 0.022 | <u>C1ORF38</u>  |
| 0.769 | 0.048 | <u>TRIM28</u>   | 0.849 | 0.023 | <u>C8ORF60</u>  |
| 0.761 | 0.040 | <u>ZNF544</u>   | 0.836 | 0.014 | <u>CPA3</u>     |
| 0.746 | 0.036 | <u>HRAS</u>     | 0.861 | 0.039 | <u>COPS8</u>    |
| 0.757 | 0.048 | <u>IPO5</u>     | 0.834 | 0.014 | <u>EVI2A</u>    |
| 0.773 | 0.065 | <u>STK25</u>    | 0.848 | 0.029 | <u>SPARCL1</u>  |
| 0.744 | 0.038 | <u>TPD52</u>    | 0.851 | 0.034 | <u>LANCL2</u>   |
| 0.760 | 0.054 | <u>CCT6A</u>    | 0.844 | 0.027 | <u>CANX</u>     |
| 0.759 | 0.053 | <u>DSC3</u>     | 0.847 | 0.030 | <u>C4BPB</u>    |
| 0.760 | 0.058 | <u>BCS1L</u>    | 0.847 | 0.030 | <u>OFD1</u>     |
| 0.751 | 0.052 | <u>TUSC2</u>    | 0.839 | 0.026 | <u>CAMSAP2</u>  |
| 0.752 | 0.056 | <u>BAG5</u>     | 0.828 | 0.018 | <u>IL13RA1</u>  |
| 0.750 | 0.055 | <u>SLC35B1</u>  | 0.842 | 0.035 | <u>PEX7</u>     |
| 0.764 | 0.075 | <u>RPS28</u>    | 0.842 | 0.036 | <u>CALD1</u>    |
| 0.724 | 0.039 | <u>MRT04</u>    | 0.849 | 0.043 | <u>VPS41</u>    |
| 0.720 | 0.035 | <u>KIAA0100</u> | 0.839 | 0.035 | <u>GDPD5</u>    |
| 0.758 | 0.082 | <u>SELL</u>     | 0.830 | 0.027 | <u>ZNF223</u>   |
| 0.737 | 0.062 | <u>RUVBL1</u>   | 0.826 | 0.024 | <u>APLNR</u>    |
| 0.723 | 0.048 | <u>EBP</u>      | 0.823 | 0.023 | <u>GIMAP6</u>   |
| 0.726 | 0.053 | <u>DYNLRB1</u>  | 0.822 | 0.023 | <u>NOTCH4</u>   |
| 0.732 | 0.063 | <u>ACSL4</u>    | 0.832 | 0.033 | <u>STMN4</u>    |
| 0.724 | 0.064 | <u>SCD</u>      | 0.839 | 0.040 | <u>EDN3</u>     |
| 0.730 | 0.069 | <u>MBD3</u>     | 0.821 | 0.023 | <u>OSBPL3</u>   |
| 0.698 | 0.050 | <u>PPIE</u>     | 0.831 | 0.034 | <u>PDE4DIP</u>  |
| 0.693 | 0.047 | <u>POLR2H</u>   | 0.814 | 0.018 | <u>GRM3</u>     |
| 0.708 | 0.067 | <u>MZT2B</u>    | 0.839 | 0.045 | <u>MEF2A</u>    |
| 0.708 | 0.068 | <u>TNPO1</u>    | 0.814 | 0.019 | <u>ZNF557</u>   |
| 0.678 | 0.041 | <u>UBE2S</u>    | 0.819 | 0.026 | <u>KLHL2</u>    |
| 0.690 | 0.058 | <u>KARS</u>     | 0.809 | 0.020 | <u>KIAA0556</u> |
| 0.689 | 0.063 | <u>KEAP1</u>    | 0.817 | 0.031 | <u>VRK2</u>     |
| 0.675 | 0.052 | <u>TXLNA</u>    | 0.808 | 0.024 | <u>CLIC5</u>    |
| 0.690 | 0.072 | <u>ZNF221</u>   | 0.805 | 0.024 | <u>CDKL3</u>    |
| 0.684 | 0.078 | <u>KPNB1</u>    | 0.802 | 0.020 | <u>FEZF2</u>    |
| 0.654 | 0.051 | <u>MTFR1</u>    | 0.816 | 0.035 | <u>FCER1G</u>   |
| 0.678 | 0.077 | <u>UTP6</u>     | 0.810 | 0.035 | <u>ITIH3</u>    |
| 0.662 | 0.063 | <u>PYCR1</u>    | 0.801 | 0.029 | <u>ENTPD1</u>   |
| 0.656 | 0.059 | <u>STMN1</u>    | 0.803 | 0.031 | <u>ZNF204P</u>  |
| 0.664 | 0.068 | <u>GNPDA1</u>   | 0.795 | 0.023 | <u>GABRA5</u>   |
| 0.651 | 0.058 | <u>SNRPD2</u>   | 0.797 | 0.027 | <u>NECAB2</u>   |
| 0.667 | 0.076 | <u>PRMT5</u>    | 0.813 | 0.045 | <u>ZC3H7A</u>   |
| 0.658 | 0.071 | <u>SEH1L</u>    | 0.792 | 0.025 | <u>GDAP1L1</u>  |
| 0.682 | 0.096 | <u>RAB11A</u>   | 0.790 | 0.024 | <u>BET1L</u>    |
| 0.671 | 0.087 | <u>DHX30</u>    | 0.808 | 0.043 | <u>SKAP2</u>    |
| 0.648 | 0.067 | <u>SFXN1</u>    | 0.803 | 0.037 | <u>AQP9</u>     |
| 0.653 | 0.076 | <u>RPS9</u>     | 0.783 | 0.020 | <u>ZNF276</u>   |
| 0.641 | 0.072 | <u>CCNA2</u>    | 0.796 | 0.033 | <u>JMJD6</u>    |
| 0.648 | 0.082 | <u>TRAM1</u>    | 0.795 | 0.034 | <u>CASP4</u>    |

|       |       |                |       |       |                 |
|-------|-------|----------------|-------|-------|-----------------|
| 0.645 | 0.079 | <u>RPS2</u>    | 0.800 | 0.038 | <u>TGFB1</u>    |
| 0.666 | 0.101 | <u>SP110</u>   | 0.806 | 0.046 | <u>EGFR</u>     |
| 0.622 | 0.057 | <u>USP14</u>   | 0.781 | 0.023 | <u>MARCH1</u>   |
| 0.668 | 0.106 | <u>ZC3H14</u>  | 0.776 | 0.018 | <u>TCIRG1</u>   |
| 0.644 | 0.089 | <u>COPB1</u>   | 0.786 | 0.030 | <u>ASGR2</u>    |
| 0.603 | 0.058 | <u>GNB2L1</u>  | 0.789 | 0.034 | <u>CSF3R</u>    |
| 0.638 | 0.093 | <u>A4GALT</u>  | 0.789 | 0.035 | <u>ACSM1</u>    |
| 0.652 | 0.108 | <u>CXORF56</u> | 0.788 | 0.034 | <u>BDH2</u>     |
| 0.610 | 0.066 | <u>NOP56</u>   | 0.785 | 0.032 | <u>SERPINB9</u> |
| 0.625 | 0.089 | <u>DDX49</u>   | 0.796 | 0.044 | <u>RAB6B</u>    |
| 0.653 | 0.118 | <u>DIAPH2</u>  | 0.786 | 0.035 | <u>FEM1B</u>    |
| 0.563 | 0.035 | <u>CSDA</u>    | 0.786 | 0.037 | <u>ADAMTS13</u> |
| 0.591 | 0.064 | <u>HP</u>      | 0.795 | 0.046 | <u>ST20</u>     |
| 0.620 | 0.106 | <u>YWHAB</u>   | 0.804 | 0.056 | <u>ZNF536</u>   |
| 0.607 | 0.097 | <u>VEGFB</u>   | 0.765 | 0.017 | <u>CCDC102B</u> |
| 0.583 | 0.078 | <u>TFCP2L1</u> | 0.762 | 0.017 | <u>SLC2A10</u>  |
| 0.607 | 0.110 | <u>FAM134A</u> | 0.787 | 0.042 | <u>CDH11</u>    |
| 0.585 | 0.090 | <u>PNP</u>     | 0.789 | 0.049 | <u>PRTN3</u>    |
| 0.609 | 0.114 | <u>SCRIB</u>   | 0.775 | 0.040 | <u>TTL7</u>     |
| 0.561 | 0.066 | <u>GLI3</u>    | 0.755 | 0.022 | <u>PTPRK</u>    |
| 0.598 | 0.106 | <u>CENPC1</u>  | 0.788 | 0.056 | <u>NFATC2IP</u> |
| 0.594 | 0.104 | <u>TMED9</u>   | 0.776 | 0.046 | <u>MOSPD2</u>   |
| 0.601 | 0.122 | <u>SYNCRIP</u> | 0.764 | 0.034 | <u>EFR3A</u>    |
| 0.601 | 0.124 | <u>ASNA1</u>   | 0.777 | 0.049 | <u>CNPY3</u>    |
| 0.571 | 0.097 | <u>FARSA</u>   | 0.759 | 0.031 | <u>CLDND1</u>   |
| 0.577 | 0.107 | <u>TMEM160</u> | 0.773 | 0.045 | <u>RNF111</u>   |
| 0.606 | 0.135 | <u>ADM</u>     | 0.755 | 0.028 | <u>PDHX</u>     |
| 0.571 | 0.103 | <u>EDF1</u>    | 0.758 | 0.031 | <u>CACNG3</u>   |
| 0.583 | 0.116 | <u>IMP4</u>    | 0.771 | 0.048 | <u>TMOD3</u>    |
| 0.577 | 0.115 | <u>BABAM1</u>  | 0.813 | 0.091 | <u>ZFAND1</u>   |
| 0.549 | 0.088 | <u>CRTAM</u>   | 0.760 | 0.040 | <u>SPAST</u>    |
| 0.569 | 0.108 | <u>GSS</u>     | 0.752 | 0.035 | <u>ANKRA2</u>   |
| 0.547 | 0.090 | <u>MAT2A</u>   | 0.749 | 0.033 | <u>KCNV1</u>    |
| 0.579 | 0.124 | <u>TCEA2</u>   | 0.750 | 0.035 | <u>HBEGF</u>    |
| 0.564 | 0.113 | <u>GHITM</u>   | 0.751 | 0.036 | <u>CADPS</u>    |
| 0.532 | 0.083 | <u>DUX1</u>    | 0.765 | 0.052 | <u>PPP2R5A</u>  |
| 0.527 | 0.088 | <u>CDKN2A</u>  | 0.762 | 0.053 | <u>MDFIC</u>    |
| 0.515 | 0.082 | <u>SH3BP1</u>  | 0.740 | 0.032 | <u>FAM49A</u>   |
| 0.517 | 0.085 | <u>BAGE</u>    | 0.729 | 0.021 | <u>PDE5A</u>    |
| 0.546 | 0.117 | <u>RPL22</u>   | 0.761 | 0.054 | <u>PLP2</u>     |
| 0.541 | 0.112 | <u>APEH</u>    | 0.741 | 0.041 | <u>CD38</u>     |
| 0.543 | 0.121 | <u>EIF3G</u>   | 0.756 | 0.057 | <u>CD48</u>     |
| 0.525 | 0.105 | <u>FMNL1</u>   | 0.743 | 0.048 | <u>GABRG2</u>   |
| 0.518 | 0.105 | <u>XBP1</u>    | 0.753 | 0.058 | <u>NUMB</u>     |
| 0.521 | 0.119 | <u>CLPX</u>    | 0.730 | 0.043 | <u>CEBPE</u>    |
| 0.531 | 0.130 | <u>FADS1</u>   | 0.755 | 0.069 | <u>CLCN3</u>    |
| 0.517 | 0.119 | <u>RNMT</u>    | 0.724 | 0.039 | <u>TREML2</u>   |

|       |       |                |       |       |                  |
|-------|-------|----------------|-------|-------|------------------|
| 0.522 | 0.123 | <u>ELOVL6</u>  | 0.718 | 0.033 | <u>COPB2</u>     |
| 0.565 | 0.174 | <u>KCNC2</u>   | 0.727 | 0.043 | <u>PITX3</u>     |
| 0.521 | 0.130 | <u>MGAT4B</u>  | 0.725 | 0.042 | <u>KCNQ1DN</u>   |
| 0.503 | 0.116 | <u>LIPC</u>    | 0.727 | 0.048 | <u>AAK1</u>      |
| 0.522 | 0.137 | <u>DNAJC9</u>  | 0.721 | 0.042 | <u>TMEM144</u>   |
| 0.547 | 0.167 | <u>CETP</u>    | 0.741 | 0.064 | <u>SCAF4</u>     |
| 0.515 | 0.139 | <u>PHB</u>     | 0.743 | 0.068 | <u>HABP4</u>     |
| 0.504 | 0.131 | <u>ATP6V0B</u> | 0.724 | 0.052 | <u>PHIP</u>      |
| 0.509 | 0.139 | <u>EIF4E</u>   | 0.717 | 0.044 | <u>DUS4L</u>     |
| 0.510 | 0.142 | <u>GTF3A</u>   | 0.704 | 0.032 | <u>GAS8</u>      |
| 0.515 | 0.162 | <u>WDR44</u>   | 0.711 | 0.039 | <u>RFPL1-AS1</u> |
|       |       |                | 0.719 | 0.047 | <u>WDR78</u>     |
|       |       |                | 0.721 | 0.050 | <u>NFE2L2</u>    |
|       |       |                | 0.725 | 0.056 | <u>PRKX</u>      |
|       |       |                | 0.720 | 0.053 | <u>POLE2</u>     |
|       |       |                | 0.729 | 0.064 | <u>LPXN</u>      |
|       |       |                | 0.719 | 0.058 | <u>SLC38A6</u>   |
|       |       |                | 0.687 | 0.026 | <u>KIF20A</u>    |
|       |       |                | 0.703 | 0.047 | <u>KIAA1107</u>  |
|       |       |                | 0.696 | 0.042 | <u>LMBRD1</u>    |
|       |       |                | 0.717 | 0.068 | <u>AGRN</u>      |
|       |       |                | 0.705 | 0.057 | <u>OR7E47P</u>   |
|       |       |                | 0.701 | 0.057 | <u>SLC16A5</u>   |
|       |       |                | 0.707 | 0.068 | <u>LY86</u>      |
|       |       |                | 0.686 | 0.051 | <u>ADAT1</u>     |
|       |       |                | 0.693 | 0.062 | <u>THRAP3</u>    |
|       |       |                | 0.698 | 0.072 | <u>TRIM14</u>    |
|       |       |                | 0.677 | 0.052 | <u>FPR3</u>      |
|       |       |                | 0.691 | 0.070 | <u>PDE4B</u>     |
|       |       |                | 0.690 | 0.069 | <u>EMR2</u>      |
|       |       |                | 0.681 | 0.063 | <u>RBM15B</u>    |
|       |       |                | 0.687 | 0.070 | <u>HSPA4</u>     |
|       |       |                | 0.682 | 0.067 | <u>WIZ</u>       |
|       |       |                | 0.661 | 0.049 | <u>CNKS2</u>     |
|       |       |                | 0.675 | 0.063 | <u>PTPRE</u>     |
|       |       |                | 0.658 | 0.052 | <u>ZNF589</u>    |
|       |       |                | 0.665 | 0.060 | <u>FRMPD4</u>    |
|       |       |                | 0.665 | 0.060 | <u>NUDT21</u>    |
|       |       |                | 0.652 | 0.047 | <u>PRR15L</u>    |
|       |       |                | 0.676 | 0.078 | <u>WTAP</u>      |
|       |       |                | 0.668 | 0.073 | <u>CASP1</u>     |
|       |       |                | 0.683 | 0.089 | <u>TWF1</u>      |
|       |       |                | 0.655 | 0.065 | <u>HIST2H2BE</u> |
|       |       |                | 0.684 | 0.094 | <u>CCR1</u>      |
|       |       |                | 0.653 | 0.069 | <u>KALRN</u>     |
|       |       |                | 0.648 | 0.065 | <u>AQR</u>       |
|       |       |                | 0.645 | 0.063 | <u>INTS1</u>     |

|  |       |       |                 |
|--|-------|-------|-----------------|
|  | 0.655 | 0.073 | <u>CLEC5A</u>   |
|  | 0.639 | 0.058 | <u>MTM1</u>     |
|  | 0.602 | 0.021 | <u>ABCF3</u>    |
|  | 0.655 | 0.075 | <u>TNFAIP1</u>  |
|  | 0.664 | 0.084 | <u>THAP3</u>    |
|  | 0.666 | 0.087 | <u>CD68</u>     |
|  | 0.690 | 0.111 | <u>PSMD7</u>    |
|  | 0.648 | 0.071 | <u>POU4F1</u>   |
|  | 0.654 | 0.080 | <u>ZNF770</u>   |
|  | 0.639 | 0.065 | <u>PIAS1</u>    |
|  | 0.646 | 0.075 | <u>TBX10</u>    |
|  | 0.634 | 0.065 | <u>CA4</u>      |
|  | 0.649 | 0.082 | <u>ATP6V1C1</u> |
|  | 0.606 | 0.039 | <u>HK1</u>      |
|  | 0.647 | 0.080 | <u>EPS8L1</u>   |
|  | 0.643 | 0.081 | <u>CST2</u>     |
|  | 0.633 | 0.071 | <u>F2</u>       |
|  | 0.692 | 0.133 | <u>NGFRAP1</u>  |
|  | 0.654 | 0.099 | <u>HK2</u>      |
|  | 0.644 | 0.093 | <u>SLC4A7</u>   |
|  | 0.655 | 0.105 | <u>KPNA2</u>    |
|  | 0.639 | 0.092 | <u>MON2</u>     |
|  | 0.649 | 0.107 | <u>EIF4E2</u>   |
|  | 0.626 | 0.087 | <u>FAM179B</u>  |
|  | 0.637 | 0.101 | <u>B4GALT1</u>  |
|  | 0.614 | 0.080 | <u>PEX11B</u>   |
|  | 0.622 | 0.090 | <u>YIPF4</u>    |
|  | 0.588 | 0.072 | <u>PCYT2</u>    |
|  | 0.621 | 0.107 | <u>SMARCA5</u>  |
|  | 0.602 | 0.089 | <u>HPX</u>      |
|  | 0.608 | 0.095 | <u>HOMER3</u>   |
|  | 0.591 | 0.081 | <u>ST3GAL2</u>  |
|  | 0.614 | 0.104 | <u>MPZL1</u>    |
|  | 0.609 | 0.099 | <u>CTBS</u>     |
|  | 0.631 | 0.122 | <u>PNISR</u>    |
|  | 0.587 | 0.078 | <u>PEX5L</u>    |
|  | 0.606 | 0.098 | <u>TROVE2</u>   |
|  | 0.580 | 0.077 | <u>AQP1</u>     |
|  | 0.590 | 0.091 | <u>SERTAD2</u>  |
|  | 0.597 | 0.099 | <u>HAP1</u>     |
|  | 0.600 | 0.103 | <u>P2RY1</u>    |
|  | 0.598 | 0.102 | <u>TCF12</u>    |
|  | 0.605 | 0.109 | <u>SEPT6</u>    |
|  | 0.602 | 0.106 | <u>SSBP1</u>    |
|  | 0.594 | 0.098 | <u>ACAP2</u>    |
|  | 0.592 | 0.099 | <u>DIDO1</u>    |
|  | 0.547 | 0.056 | <u>INPP1</u>    |

|  |       |       |                 |
|--|-------|-------|-----------------|
|  | 0.593 | 0.104 | <u>CCL2</u>     |
|  | 0.574 | 0.089 | LOC254896       |
|  | 0.584 | 0.103 | <u>SLC35A2</u>  |
|  | 0.577 | 0.096 | <u>HAND2</u>    |
|  | 0.577 | 0.098 | <u>RAB28</u>    |
|  | 0.585 | 0.106 | <u>GDF11</u>    |
|  | 0.560 | 0.081 | <u>MCM6</u>     |
|  | 0.591 | 0.114 | LINC00342       |
|  | 0.586 | 0.115 | <u>CD44</u>     |
|  | 0.576 | 0.105 | <u>FOLR3</u>    |
|  | 0.563 | 0.104 | <u>N4BP1</u>    |
|  | 0.566 | 0.111 | NARFL           |
|  | 0.544 | 0.091 | <u>RAB7A</u>    |
|  | 0.547 | 0.095 | <u>SIM2</u>     |
|  | 0.559 | 0.107 | <u>TRPC6</u>    |
|  | 0.546 | 0.097 | <u>CALCRL</u>   |
|  | 0.544 | 0.096 | <u>FAM105A</u>  |
|  | 0.568 | 0.121 | <u>PPP2CB</u>   |
|  | 0.554 | 0.109 | <u>NFYA</u>     |
|  | 0.551 | 0.107 | <u>SCN3B</u>    |
|  | 0.543 | 0.101 | MUC8            |
|  | 0.554 | 0.118 | <u>PAPOLA</u>   |
|  | 0.548 | 0.119 | <u>EIF5A</u>    |
|  | 0.531 | 0.107 | <u>SEPT4</u>    |
|  | 0.514 | 0.090 | <u>TMSB15A</u>  |
|  | 0.552 | 0.131 | <u>SOCS5</u>    |
|  | 0.542 | 0.126 | <u>MMP14</u>    |
|  | 0.539 | 0.127 | <u>IL11</u>     |
|  | 0.533 | 0.122 | <u>BMP2K</u>    |
|  | 0.527 | 0.118 | <u>SLC25A14</u> |
|  | 0.522 | 0.114 | <u>CASC1</u>    |
|  | 0.535 | 0.130 | <u>CDKN2C</u>   |
|  | 0.545 | 0.140 | <u>ALG13</u>    |
|  | 0.525 | 0.124 | <u>CCR2</u>     |
|  | 0.530 | 0.132 | <u>TMEM5</u>    |
|  | 0.520 | 0.122 | <u>OGFR</u>     |
|  | 0.520 | 0.123 | <u>ACO2</u>     |
|  | 0.523 | 0.131 | <u>KDM6B</u>    |
|  | 0.547 | 0.156 | <u>FAM13B</u>   |
|  | 0.514 | 0.123 | <u>CNTN2</u>    |
|  | 0.505 | 0.116 | <u>MOBP</u>     |
|  | 0.513 | 0.129 | <u>ZCCHC11</u>  |
|  | 0.515 | 0.133 | <u>GRB10</u>    |
|  | 0.504 | 0.130 | <u>FGF1</u>     |
|  | 0.504 | 0.130 | <u>PIGB</u>     |
|  | 0.506 | 0.133 | <u>PTMS</u>     |
|  | 0.501 | 0.129 | <u>NPPA</u>     |

|  |       |       |               |
|--|-------|-------|---------------|
|  | 0.503 | 0.133 | <u>PHKB</u>   |
|  | 0.504 | 0.135 | <u>C5AR1</u>  |
|  | 0.508 | 0.140 | <u>HUWE1</u>  |
|  | 0.521 | 0.154 | <u>TMEM93</u> |
|  | 0.501 | 0.144 | <u>PEX1</u>   |
|  | 0.511 | 0.155 | <u>DDIT4</u>  |
|  | 0.522 | 0.168 | <u>CXADR</u>  |
|  | 0.507 | 0.159 | <u>TGOLN2</u> |

### VCAP\_24h based prediction result

| Pa    | Pi    | DownRegulation  | Pa    | Pi    | UpRegulation      |
|-------|-------|-----------------|-------|-------|-------------------|
| 0.995 | 0.004 | <u>SPAG7</u>    | 0.996 | 0.004 | <u>USP46</u>      |
| 0.991 | 0.003 | <u>HAX1</u>     | 0.995 | 0.004 | <u>DZIP3</u>      |
| 0.991 | 0.004 | <u>EIF3I</u>    | 0.994 | 0.004 | <u>CPT1A</u>      |
| 0.991 | 0.004 | <u>RANGAP1</u>  | 0.994 | 0.004 | <u>SLC23A2</u>    |
| 0.990 | 0.004 | <u>SPATS2</u>   | 0.993 | 0.004 | <u>TCL1B</u>      |
| 0.991 | 0.005 | <u>GGPS1</u>    | 0.994 | 0.005 | <u>DENND2D</u>    |
| 0.990 | 0.004 | <u>ZNF259</u>   | 0.993 | 0.005 | <u>NRG2</u>       |
| 0.991 | 0.005 | <u>UOCRB</u>    | 0.993 | 0.004 | <u>FRK</u>        |
| 0.990 | 0.004 | <u>GRSF1</u>    | 0.992 | 0.004 | <u>CLCN7</u>      |
| 0.989 | 0.004 | <u>PFDN5</u>    | 0.993 | 0.004 | <u>PRIM2</u>      |
| 0.990 | 0.005 | <u>TMEM97</u>   | 0.992 | 0.004 | <u>SH3D21</u>     |
| 0.988 | 0.004 | <u>C16ORF88</u> | 0.992 | 0.004 | <u>CD164</u>      |
| 0.988 | 0.003 | <u>SMCHD1</u>   | 0.992 | 0.005 | <u>PLCH1</u>      |
| 0.989 | 0.005 | <u>SKIV2L</u>   | 0.992 | 0.004 | <u>TMF1</u>       |
| 0.988 | 0.004 | <u>LMF2</u>     | 0.992 | 0.004 | <u>USH1C</u>      |
| 0.988 | 0.004 | <u>PSPH</u>     | 0.992 | 0.005 | <u>CADM4</u>      |
| 0.987 | 0.003 | <u>RAB7L1</u>   | 0.991 | 0.003 | <u>PREP</u>       |
| 0.988 | 0.005 | <u>HNRNPH3</u>  | 0.992 | 0.005 | <u>PDIA5</u>      |
| 0.987 | 0.004 | <u>RAP2C</u>    | 0.991 | 0.004 | <u>HSD3B2</u>     |
| 0.988 | 0.004 | <u>NUP98</u>    | 0.991 | 0.005 | <u>PART1</u>      |
| 0.988 | 0.004 | <u>NPIP</u>     | 0.991 | 0.004 | <u>PLEC</u>       |
| 0.987 | 0.004 | <u>DAZAP2</u>   | 0.991 | 0.004 | <u>GRSF1</u>      |
| 0.987 | 0.004 | <u>NBPF10</u>   | 0.991 | 0.004 | <u>DYRK2</u>      |
| 0.988 | 0.004 | <u>PDIA4</u>    | 0.990 | 0.004 | <u>GOLGA4</u>     |
| 0.988 | 0.004 | <u>PPIF</u>     | 0.990 | 0.004 | <u>FAM171A1</u>   |
| 0.987 | 0.004 | <u>WWP1</u>     | 0.990 | 0.004 | <u>ETAA1</u>      |
| 0.987 | 0.004 | <u>GRK6</u>     | 0.990 | 0.004 | <u>NCRNA00185</u> |
| 0.987 | 0.005 | <u>TIAL1</u>    | 0.990 | 0.004 | <u>SCN9A</u>      |
| 0.987 | 0.005 | <u>SYPL1</u>    | 0.990 | 0.004 | <u>ABHD2</u>      |
| 0.986 | 0.004 | <u>ZFAND1</u>   | 0.990 | 0.004 | <u>CDSN</u>       |
| 0.987 | 0.005 | <u>STAU1</u>    | 0.989 | 0.003 | <u>RNF126P1</u>   |
| 0.986 | 0.004 | <u>DYNC1LI1</u> | 0.990 | 0.004 | <u>RAP1A</u>      |
| 0.986 | 0.004 | <u>HSP90AB1</u> | 0.990 | 0.004 | <u>RAB3B</u>      |
| 0.986 | 0.005 | <u>SLC4A2</u>   | 0.990 | 0.004 | <u>RIBC2</u>      |
| 0.984 | 0.003 | <u>MYBL1</u>    | 0.990 | 0.005 | <u>POU3F1</u>     |

|       |       |                 |       |       |                 |
|-------|-------|-----------------|-------|-------|-----------------|
| 0.984 | 0.003 | <u>MCL1</u>     | 0.990 | 0.004 | <u>KHSRP</u>    |
| 0.986 | 0.005 | <u>MLLT11</u>   | 0.990 | 0.004 | <u>PIAS3</u>    |
| 0.985 | 0.005 | <u>PSMB9</u>    | 0.990 | 0.004 | <u>UFL1</u>     |
| 0.985 | 0.004 | <u>MSL1</u>     | 0.990 | 0.005 | <u>DLG3</u>     |
| 0.984 | 0.004 | <u>NAAA</u>     | 0.990 | 0.005 | <u>PCYT1B</u>   |
| 0.983 | 0.003 | <u>FGFR4</u>    | 0.990 | 0.004 | <u>NKX3-1</u>   |
| 0.982 | 0.002 | <u>RIT1</u>     | 0.990 | 0.004 | <u>CGA</u>      |
| 0.983 | 0.004 | <u>NEK4</u>     | 0.990 | 0.004 | <u>PPOX</u>     |
| 0.982 | 0.004 | <u>MTUS1</u>    | 0.990 | 0.005 | <u>RAB30</u>    |
| 0.981 | 0.003 | <u>RAD54L2</u>  | 0.989 | 0.004 | <u>FAM86A</u>   |
| 0.982 | 0.004 | <u>IL6ST</u>    | 0.989 | 0.004 | <u>UGT2B17</u>  |
| 0.982 | 0.004 | <u>PHF10</u>    | 0.990 | 0.005 | <u>CAPN10</u>   |
| 0.982 | 0.004 | <u>GPBP1L1</u>  | 0.989 | 0.004 | <u>GAB2</u>     |
| 0.982 | 0.004 | <u>GADD45B</u>  | 0.990 | 0.005 | <u>ITGB1</u>    |
| 0.983 | 0.005 | <u>RNF220</u>   | 0.990 | 0.005 | <u>GGA2</u>     |
| 0.982 | 0.004 | <u>PLS3</u>     | 0.990 | 0.005 | <u>UBA6</u>     |
| 0.980 | 0.003 | <u>STAT5B</u>   | 0.990 | 0.005 | <u>SCUBE3</u>   |
| 0.982 | 0.004 | <u>TALDO1</u>   | 0.988 | 0.003 | <u>SUMO4</u>    |
| 0.981 | 0.004 | <u>BST2</u>     | 0.988 | 0.003 | <u>KLHL25</u>   |
| 0.982 | 0.005 | <u>TCTN3</u>    | 0.989 | 0.005 | <u>ARHGAP44</u> |
| 0.982 | 0.005 | <u>C12ORF43</u> | 0.989 | 0.005 | <u>LMF1</u>     |
| 0.981 | 0.004 | <u>P2RX5</u>    | 0.989 | 0.004 | <u>AASS</u>     |
| 0.981 | 0.005 | <u>DCTN6</u>    | 0.989 | 0.004 | <u>U2AF2</u>    |
| 0.980 | 0.003 | <u>TSPAN7</u>   | 0.987 | 0.003 | <u>ABHD11</u>   |
| 0.980 | 0.004 | <u>IFIT3</u>    | 0.989 | 0.005 | <u>MALT1</u>    |
| 0.981 | 0.005 | <u>PPP1R12A</u> | 0.987 | 0.004 | <u>NAT6</u>     |
| 0.981 | 0.005 | <u>KDM2A</u>    | 0.988 | 0.004 | <u>EHHADH</u>   |
| 0.981 | 0.004 | <u>GAP43</u>    | 0.988 | 0.005 | <u>PAX5</u>     |
| 0.981 | 0.004 | <u>YARS</u>     | 0.987 | 0.003 | <u>ETV4</u>     |
| 0.981 | 0.004 | <u>STK17A</u>   | 0.987 | 0.003 | <u>IQGAP2</u>   |
| 0.981 | 0.005 | <u>SCAMP4</u>   | 0.988 | 0.005 | <u>LPHN3</u>    |
| 0.981 | 0.005 | <u>TRAM2</u>    | 0.988 | 0.005 | <u>CHML</u>     |
| 0.981 | 0.005 | <u>MAX</u>      | 0.988 | 0.005 | <u>PDS5B</u>    |
| 0.980 | 0.004 | <u>HERC1</u>    | 0.987 | 0.004 | <u>NUDT18</u>   |
| 0.980 | 0.005 | <u>LIMA1</u>    | 0.988 | 0.005 | <u>LTK</u>      |
| 0.980 | 0.004 | <u>TTC4</u>     | 0.987 | 0.004 | <u>CHL1</u>     |
| 0.980 | 0.005 | <u>CCDC93</u>   | 0.987 | 0.004 | <u>RPS6KA2</u>  |
| 0.980 | 0.004 | <u>GOLGA2</u>   | 0.987 | 0.004 | <u>HAPLN1</u>   |
| 0.980 | 0.004 | <u>CDK10</u>    | 0.988 | 0.005 | <u>ST8SIA4</u>  |
| 0.980 | 0.004 | <u>PAK2</u>     | 0.986 | 0.004 | <u>ATP5L</u>    |
| 0.980 | 0.005 | <u>BFAR</u>     | 0.987 | 0.004 | <u>MYO1A</u>    |
| 0.979 | 0.004 | <u>TTI2</u>     | 0.987 | 0.005 | <u>ATP5C1</u>   |
| 0.980 | 0.004 | <u>UBXN7</u>    | 0.987 | 0.004 | <u>FAM188A</u>  |
| 0.980 | 0.005 | <u>RAB14</u>    | 0.986 | 0.004 | <u>PIGZ</u>     |
| 0.978 | 0.003 | <u>NRGN</u>     | 0.987 | 0.005 | <u>PCCA</u>     |
| 0.980 | 0.005 | <u>ING1</u>     | 0.987 | 0.005 | <u>PQBP1</u>    |
| 0.980 | 0.004 | <u>GFER</u>     | 0.986 | 0.004 | <u>POF1B</u>    |

|       |       |                 |       |       |                 |
|-------|-------|-----------------|-------|-------|-----------------|
| 0.980 | 0.005 | <u>PTP4A2</u>   | 0.986 | 0.004 | <u>NPPB</u>     |
| 0.979 | 0.004 | <u>ZNF189</u>   | 0.987 | 0.005 | <u>ATP10B</u>   |
| 0.980 | 0.005 | <u>SNRPC</u>    | 0.986 | 0.005 | <u>TTC30A</u>   |
| 0.979 | 0.004 | <u>FAM193A</u>  | 0.986 | 0.005 | <u>UMPS</u>     |
| 0.980 | 0.005 | <u>NBL1</u>     | 0.985 | 0.003 | <u>RASSF7</u>   |
| 0.979 | 0.004 | <u>CALCOCO2</u> | 0.985 | 0.003 | <u>SLC12A7</u>  |
| 0.979 | 0.004 | <u>KDELR3</u>   | 0.987 | 0.005 | <u>YTHDC2</u>   |
| 0.980 | 0.005 | <u>UBAP2</u>    | 0.986 | 0.005 | <u>CD24</u>     |
| 0.979 | 0.004 | <u>CLDN18</u>   | 0.986 | 0.005 | <u>FGF5</u>     |
| 0.979 | 0.004 | <u>ACTR1A</u>   | 0.986 | 0.005 | <u>LRP5L</u>    |
| 0.979 | 0.005 | <u>LSG1</u>     | 0.986 | 0.005 | <u>NPFFR1</u>   |
| 0.978 | 0.003 | <u>UGP2</u>     | 0.986 | 0.005 | <u>ITPR1</u>    |
| 0.978 | 0.003 | <u>MS4A4A</u>   | 0.985 | 0.005 | <u>GNA11</u>    |
| 0.979 | 0.005 | <u>PFDN1</u>    | 0.985 | 0.005 | <u>SEC31A</u>   |
| 0.979 | 0.005 | <u>SRP54</u>    | 0.985 | 0.005 | <u>ZCWPW1</u>   |
| 0.978 | 0.004 | <u>RASSF4</u>   | 0.983 | 0.003 | <u>TBCA</u>     |
| 0.977 | 0.003 | <u>TNFSF9</u>   | 0.983 | 0.003 | <u>TSPAN1</u>   |
| 0.979 | 0.005 | <u>RAB1F</u>    | 0.984 | 0.004 | <u>UTF1</u>     |
| 0.976 | 0.002 | <u>DSG3</u>     | 0.985 | 0.005 | <u>AMBP</u>     |
| 0.978 | 0.004 | <u>PTMS</u>     | 0.985 | 0.005 | <u>NR2F6</u>    |
| 0.979 | 0.005 | <u>APBA2</u>    | 0.984 | 0.005 | <u>ARHGAP33</u> |
| 0.978 | 0.004 | <u>VAMP8</u>    | 0.984 | 0.004 | <u>FAM174B</u>  |
| 0.978 | 0.004 | <u>PRSS3</u>    | 0.985 | 0.005 | <u>CALM1</u>    |
| 0.978 | 0.005 | <u>LIAS</u>     | 0.984 | 0.004 | <u>C9ORF167</u> |
| 0.977 | 0.004 | <u>CTSB</u>     | 0.984 | 0.005 | <u>KDM4C</u>    |
| 0.978 | 0.004 | <u>POMT1</u>    | 0.984 | 0.005 | <u>ZFHX3</u>    |
| 0.978 | 0.004 | <u>UIMC1</u>    | 0.984 | 0.005 | <u>NCOA2</u>    |
| 0.978 | 0.005 | <u>ITM2B</u>    | 0.984 | 0.005 | <u>ANGPTL7</u>  |
| 0.979 | 0.005 | <u>CCNG2</u>    | 0.984 | 0.004 | <u>IDH2</u>     |
| 0.978 | 0.004 | <u>MT3</u>      | 0.983 | 0.004 | <u>MNS1</u>     |
| 0.979 | 0.005 | <u>TTF1</u>     | 0.983 | 0.004 | <u>LAP3</u>     |
| 0.978 | 0.005 | <u>CIAO1</u>    | 0.984 | 0.005 | <u>COL11A1</u>  |
| 0.977 | 0.004 | <u>SFRP4</u>    | 0.984 | 0.005 | <u>OSBPL10</u>  |
| 0.978 | 0.005 | <u>LSM14A</u>   | 0.984 | 0.005 | <u>IL17RC</u>   |
| 0.978 | 0.004 | <u>NUDT4</u>    | 0.983 | 0.005 | <u>FBXO21</u>   |
| 0.978 | 0.005 | <u>DIAPH1</u>   | 0.982 | 0.003 | <u>HERC2</u>    |
| 0.978 | 0.004 | <u>SPATA2</u>   | 0.983 | 0.004 | <u>IRGQ</u>     |
| 0.978 | 0.005 | <u>PEX14</u>    | 0.983 | 0.004 | <u>FSCN1</u>    |
| 0.978 | 0.005 | <u>COPS8</u>    | 0.983 | 0.005 | <u>ARID1A</u>   |
| 0.978 | 0.005 | <u>TCEA1</u>    | 0.983 | 0.005 | <u>F5</u>       |
| 0.977 | 0.004 | <u>MEGF9</u>    | 0.982 | 0.004 | <u>GPATCH1</u>  |
| 0.978 | 0.005 | <u>SHQ1</u>     | 0.982 | 0.004 | <u>QRSL1</u>    |
| 0.977 | 0.004 | <u>PRKD2</u>    | 0.980 | 0.002 | <u>ADPGK</u>    |
| 0.977 | 0.004 | <u>DVL3</u>     | 0.982 | 0.004 | <u>KIAA0894</u> |
| 0.977 | 0.004 | <u>FUCA1</u>    | 0.983 | 0.005 | <u>B3GAT1</u>   |
| 0.977 | 0.004 | <u>PLEKHA1</u>  | 0.982 | 0.004 | <u>EXT2</u>     |
| 0.977 | 0.005 | <u>M6PR</u>     | 0.982 | 0.005 | <u>CEP57</u>    |

|       |       |                  |       |       |                  |
|-------|-------|------------------|-------|-------|------------------|
| 0.977 | 0.005 | <u>OBFC2B</u>    | 0.982 | 0.005 | <u>CCL23</u>     |
| 0.978 | 0.005 | <u>DDA1</u>      | 0.982 | 0.004 | <u>RBL1</u>      |
| 0.978 | 0.005 | <u>BANP</u>      | 0.982 | 0.004 | <u>ZDHC13</u>    |
| 0.978 | 0.005 | <u>COMMD9</u>    | 0.982 | 0.005 | <u>HIST1H1D</u>  |
| 0.977 | 0.005 | <u>ELMO2</u>     | 0.982 | 0.005 | <u>ZEB2</u>      |
| 0.976 | 0.004 | <u>PPAP2C</u>    | 0.982 | 0.004 | <u>INPP1</u>     |
| 0.977 | 0.004 | <u>C6ORF64</u>   | 0.982 | 0.004 | <u>ACTA1</u>     |
| 0.976 | 0.004 | <u>REEP1</u>     | 0.981 | 0.004 | <u>UFC1</u>      |
| 0.977 | 0.005 | <u>SRPR</u>      | 0.981 | 0.004 | <u>PDE8B</u>     |
| 0.976 | 0.003 | <u>IGLV2-23</u>  | 0.981 | 0.004 | <u>LOC399491</u> |
| 0.977 | 0.004 | <u>AGPAT1</u>    | 0.982 | 0.005 | <u>DDC</u>       |
| 0.976 | 0.004 | <u>TSPYL2</u>    | 0.981 | 0.004 | <u>KLK5</u>      |
| 0.977 | 0.005 | <u>GCC2</u>      | 0.980 | 0.004 | <u>ANPEP</u>     |
| 0.974 | 0.002 | <u>F13A1</u>     | 0.982 | 0.005 | <u>CPS1-IT1</u>  |
| 0.978 | 0.005 | <u>PPP6C</u>     | 0.981 | 0.005 | <u>IL1A</u>      |
| 0.976 | 0.004 | <u>FZD7</u>      | 0.981 | 0.005 | <u>NAP1L2</u>    |
| 0.977 | 0.005 | <u>ISCU</u>      | 0.981 | 0.005 | <u>P4HB</u>      |
| 0.976 | 0.004 | <u>CRNN</u>      | 0.981 | 0.005 | <u>NUS1P3</u>    |
| 0.977 | 0.005 | <u>UBAP1</u>     | 0.981 | 0.005 | <u>SRSF3</u>     |
| 0.976 | 0.004 | <u>BCKDHB</u>    | 0.981 | 0.005 | <u>TYRP1</u>     |
| 0.977 | 0.005 | <u>MRPL18</u>    | 0.980 | 0.004 | <u>CLN6</u>      |
| 0.977 | 0.005 | <u>TUBGCP4</u>   | 0.981 | 0.005 | <u>LCK</u>       |
| 0.976 | 0.004 | <u>ATP6V1E1</u>  | 0.980 | 0.004 | <u>RYR1</u>      |
| 0.976 | 0.004 | <u>PGM3</u>      | 0.981 | 0.005 | <u>MFSD6</u>     |
| 0.976 | 0.004 | <u>UGT2A3</u>    | 0.980 | 0.004 | <u>FARP2</u>     |
| 0.976 | 0.004 | <u>PCSK7</u>     | 0.980 | 0.004 | <u>WARS2</u>     |
| 0.976 | 0.005 | <u>TRAM1</u>     | 0.981 | 0.005 | <u>ZMAT5</u>     |
| 0.976 | 0.004 | <u>RGL2</u>      | 0.980 | 0.005 | <u>ARHGEF16</u>  |
| 0.976 | 0.004 | <u>DCAF10</u>    | 0.981 | 0.005 | <u>NCF4</u>      |
| 0.976 | 0.005 | <u>DLX2</u>      | 0.980 | 0.004 | <u>COL9A1</u>    |
| 0.976 | 0.005 | <u>NECAP2</u>    | 0.980 | 0.004 | <u>NLGN4X</u>    |
| 0.975 | 0.004 | <u>FAM8A1</u>    | 0.980 | 0.005 | <u>LOC202181</u> |
| 0.976 | 0.005 | <u>PRR7</u>      | 0.980 | 0.005 | <u>KLC2</u>      |
| 0.975 | 0.004 | <u>CD7</u>       | 0.982 | 0.006 | <u>FAM153A</u>   |
| 0.974 | 0.002 | <u>SERHL2</u>    | 0.980 | 0.005 | <u>C19ORF40</u>  |
| 0.976 | 0.005 | <u>DERL2</u>     | 0.980 | 0.005 | <u>LPHN1</u>     |
| 0.976 | 0.004 | <u>MUM1</u>      | 0.980 | 0.005 | <u>AZI2</u>      |
| 0.975 | 0.004 | <u>CHMP3</u>     | 0.980 | 0.005 | <u>ULK2</u>      |
| 0.976 | 0.004 | <u>NKIRAS2</u>   | 0.979 | 0.004 | <u>DAAM1</u>     |
| 0.977 | 0.006 | <u>C12ORF48</u>  | 0.979 | 0.004 | <u>LRIG1</u>     |
| 0.976 | 0.005 | <u>NXF1</u>      | 0.980 | 0.005 | <u>HEXA</u>      |
| 0.976 | 0.005 | <u>E2F6</u>      | 0.979 | 0.004 | <u>TMEM126B</u>  |
| 0.976 | 0.005 | <u>RBMS1</u>     | 0.980 | 0.005 | <u>ATP9A</u>     |
| 0.974 | 0.003 | <u>TNFRSF12A</u> | 0.979 | 0.004 | <u>MEGF6</u>     |
| 0.975 | 0.004 | <u>C1QTNF1</u>   | 0.980 | 0.005 | <u>TMEM151B</u>  |
| 0.976 | 0.005 | <u>STK19</u>     | 0.979 | 0.004 | <u>MPV17</u>     |
| 0.975 | 0.004 | <u>CLK3</u>      | 0.980 | 0.005 | <u>KLK7</u>      |

|       |       |                  |       |       |                  |
|-------|-------|------------------|-------|-------|------------------|
| 0.976 | 0.005 | <u>IDH3G</u>     | 0.979 | 0.005 | <u>ZHX2</u>      |
| 0.976 | 0.005 | <u>TRAP1</u>     | 0.980 | 0.005 | <u>FOXH1</u>     |
| 0.975 | 0.004 | <u>CD82</u>      | 0.979 | 0.005 | <u>ECHDC3</u>    |
| 0.975 | 0.005 | <u>C1ORF216</u>  | 0.979 | 0.005 | <u>TAGLN2</u>    |
| 0.974 | 0.004 | <u>FBXO34</u>    | 0.979 | 0.005 | <u>KLK8</u>      |
| 0.974 | 0.004 | <u>FAM102A</u>   | 0.978 | 0.004 | <u>DNMT3B</u>    |
| 0.975 | 0.004 | <u>C9ORF114</u>  | 0.979 | 0.005 | <u>GAN</u>       |
| 0.975 | 0.005 | <u>C9ORF78</u>   | 0.979 | 0.005 | <u>NUP43</u>     |
| 0.974 | 0.005 | <u>ZNF529</u>    | 0.979 | 0.005 | <u>FOXJ1</u>     |
| 0.973 | 0.003 | <u>SALL1</u>     | 0.980 | 0.005 | <u>SORBS1</u>    |
| 0.973 | 0.004 | <u>C1ORF61</u>   | 0.977 | 0.003 | <u>BRMS1</u>     |
| 0.974 | 0.005 | <u>DUS4L</u>     | 0.980 | 0.006 | <u>KRT85</u>     |
| 0.973 | 0.004 | <u>ZDHHC18</u>   | 0.979 | 0.005 | <u>PROC</u>      |
| 0.973 | 0.004 | <u>SCMH1</u>     | 0.979 | 0.005 | <u>ICOSLG</u>    |
| 0.974 | 0.005 | <u>AKAP8</u>     | 0.979 | 0.005 | <u>CCDC165</u>   |
| 0.974 | 0.005 | <u>TNPO1</u>     | 0.979 | 0.005 | <u>MAP2K7</u>    |
| 0.973 | 0.004 | <u>DBN1</u>      | 0.979 | 0.005 | <u>TOMM22</u>    |
| 0.973 | 0.005 | <u>ATG13</u>     | 0.978 | 0.004 | <u>TRMT61B</u>   |
| 0.974 | 0.005 | <u>RPL29</u>     | 0.978 | 0.004 | <u>KHDRBS3</u>   |
| 0.973 | 0.004 | <u>COL6A2</u>    | 0.978 | 0.004 | <u>ZNF226</u>    |
| 0.973 | 0.004 | <u>BAP1</u>      | 0.978 | 0.005 | <u>C8ORF60</u>   |
| 0.973 | 0.005 | <u>CNPY3</u>     | 0.978 | 0.004 | <u>GLTPD1</u>    |
| 0.973 | 0.005 | <u>PKD1P1</u>    | 0.978 | 0.004 | <u>FAM173A</u>   |
| 0.973 | 0.005 | <u>RPS19</u>     | 0.978 | 0.005 | <u>GNG4</u>      |
| 0.972 | 0.004 | <u>NEU1</u>      | 0.978 | 0.005 | <u>PPAP2A</u>    |
| 0.972 | 0.004 | <u>TNKS2</u>     | 0.978 | 0.004 | <u>ZNF33B</u>    |
| 0.971 | 0.003 | <u>C16ORF7</u>   | 0.977 | 0.004 | <u>GOLGA8H</u>   |
| 0.973 | 0.005 | <u>CARS</u>      | 0.978 | 0.005 | <u>CHRNA2</u>    |
| 0.971 | 0.004 | <u>TMPRSS11D</u> | 0.978 | 0.005 | <u>PSMA2</u>     |
| 0.971 | 0.004 | <u>DRAM1</u>     | 0.978 | 0.004 | <u>FYCO1</u>     |
| 0.976 | 0.008 | <u>DDX41</u>     | 0.978 | 0.005 | <u>PPP6R1</u>    |
| 0.972 | 0.005 | <u>RPP30</u>     | 0.977 | 0.004 | <u>RUFY2</u>     |
| 0.972 | 0.004 | <u>CLEC11A</u>   | 0.978 | 0.005 | <u>DLG5</u>      |
| 0.972 | 0.005 | <u>NFYB</u>      | 0.977 | 0.004 | <u>DHRS1</u>     |
| 0.971 | 0.004 | <u>LOC220594</u> | 0.978 | 0.005 | <u>LSAMP</u>     |
| 0.971 | 0.004 | <u>MST1</u>      | 0.978 | 0.005 | <u>EXOG</u>      |
| 0.971 | 0.004 | <u>TMEM45A</u>   | 0.979 | 0.006 | <u>ERN2</u>      |
| 0.971 | 0.004 | <u>FERMT1</u>    | 0.976 | 0.003 | <u>POP7</u>      |
| 0.971 | 0.004 | <u>RAF1</u>      | 0.977 | 0.005 | <u>CYP24A1</u>   |
| 0.973 | 0.006 | <u>MLX</u>       | 0.978 | 0.005 | <u>CLDN3</u>     |
| 0.971 | 0.005 | <u>PSMD6</u>     | 0.977 | 0.004 | <u>PEPD</u>      |
| 0.970 | 0.004 | <u>ENOX2</u>     | 0.978 | 0.005 | <u>ATG2B</u>     |
| 0.971 | 0.005 | <u>IMMT</u>      | 0.977 | 0.005 | <u>TREX1</u>     |
| 0.969 | 0.003 | <u>TMEM140</u>   | 0.977 | 0.004 | <u>C14ORF169</u> |
| 0.970 | 0.004 | <u>CREB3</u>     | 0.977 | 0.004 | <u>NDN</u>       |
| 0.970 | 0.004 | <u>S100A14</u>   | 0.977 | 0.004 | <u>MAGED1</u>    |
| 0.970 | 0.004 | <u>ERF</u>       | 0.977 | 0.005 | <u>GMIP</u>      |

|       |       |                  |       |       |                  |
|-------|-------|------------------|-------|-------|------------------|
| 0.970 | 0.004 | <u>ANXA10</u>    | 0.977 | 0.004 | <u>ZNF358</u>    |
| 0.970 | 0.005 | <u>RTN4</u>      | 0.976 | 0.004 | <u>PAXIP1</u>    |
| 0.970 | 0.004 | <u>FUT4</u>      | 0.977 | 0.004 | <u>POGK</u>      |
| 0.969 | 0.004 | <u>KIAA0319L</u> | 0.977 | 0.005 | <u>NEBL</u>      |
| 0.969 | 0.004 | <u>TRAF2</u>     | 0.977 | 0.005 | <u>PPM1F</u>     |
| 0.970 | 0.005 | <u>FOLR1</u>     | 0.977 | 0.004 | <u>CXCL13</u>    |
| 0.967 | 0.003 | <u>SERPINI1</u>  | 0.977 | 0.004 | <u>ZBTB38</u>    |
| 0.969 | 0.005 | <u>RHCG</u>      | 0.977 | 0.005 | <u>PDHX</u>      |
| 0.968 | 0.003 | <u>TEAD3</u>     | 0.976 | 0.004 | <u>KDELC1</u>    |
| 0.969 | 0.005 | <u>DIEXF</u>     | 0.976 | 0.005 | <u>EIF4H</u>     |
| 0.969 | 0.004 | <u>TEX261</u>    | 0.977 | 0.005 | <u>PROX1</u>     |
| 0.969 | 0.005 | <u>LMO4</u>      | 0.976 | 0.004 | <u>ENTPD6</u>    |
| 0.968 | 0.004 | <u>CASP2</u>     | 0.977 | 0.005 | <u>PDIA4</u>     |
| 0.969 | 0.005 | <u>TRAK1</u>     | 0.976 | 0.005 | <u>FLG</u>       |
| 0.967 | 0.003 | <u>TMEM183A</u>  | 0.975 | 0.004 | <u>PPIP5K2</u>   |
| 0.968 | 0.004 | <u>MRC2</u>      | 0.976 | 0.005 | <u>TM9SF1</u>    |
| 0.968 | 0.004 | <u>STRADA</u>    | 0.976 | 0.005 | <u>NBAS</u>      |
| 0.968 | 0.004 | <u>SPHK1</u>     | 0.976 | 0.005 | <u>FCGR2A</u>    |
| 0.968 | 0.004 | <u>GCNT1</u>     | 0.976 | 0.005 | <u>SPATA2L</u>   |
| 0.967 | 0.003 | <u>APOL1</u>     | 0.976 | 0.005 | <u>SMARCE1</u>   |
| 0.968 | 0.004 | <u>FBXO11</u>    | 0.976 | 0.004 | <u>TEAD1</u>     |
| 0.967 | 0.004 | <u>DLG4</u>      | 0.976 | 0.005 | <u>NASP</u>      |
| 0.969 | 0.006 | <u>BICD2</u>     | 0.976 | 0.004 | <u>PC</u>        |
| 0.971 | 0.008 | <u>KIAA0913</u>  | 0.976 | 0.005 | <u>PRPS1</u>     |
| 0.967 | 0.004 | <u>CNPY4</u>     | 0.976 | 0.004 | <u>DYNC2H1</u>   |
| 0.965 | 0.003 | <u>SEMA3G</u>    | 0.976 | 0.005 | <u>LY6G6C</u>    |
| 0.967 | 0.004 | <u>MEOX1</u>     | 0.976 | 0.005 | <u>FABP6</u>     |
| 0.967 | 0.004 | <u>RAB25</u>     | 0.976 | 0.005 | <u>FAM189A1</u>  |
| 0.969 | 0.007 | <u>BRP44L</u>    | 0.976 | 0.005 | <u>CADPS2</u>    |
| 0.966 | 0.004 | <u>MGST3</u>     | 0.977 | 0.006 | <u>TLL2</u>      |
| 0.966 | 0.005 | <u>THUMPD1</u>   | 0.976 | 0.005 | <u>CIDEA</u>     |
| 0.966 | 0.004 | <u>GABARAPL1</u> | 0.975 | 0.003 | <u>UBE2M</u>     |
| 0.967 | 0.005 | <u>ERGIC2</u>    | 0.976 | 0.005 | <u>LDOC1</u>     |
| 0.966 | 0.004 | <u>UBXN6</u>     | 0.978 | 0.007 | <u>MAN1A2</u>    |
| 0.966 | 0.005 | <u>MYO1C</u>     | 0.976 | 0.005 | <u>MANEA</u>     |
| 0.965 | 0.005 | <u>CDK9</u>      | 0.977 | 0.006 | <u>CNTN1</u>     |
| 0.965 | 0.004 | <u>BCKDHA</u>    | 0.976 | 0.005 | <u>ARVCF</u>     |
| 0.966 | 0.006 | <u>LOC399491</u> | 0.975 | 0.004 | <u>PRRC2B</u>    |
| 0.968 | 0.008 | <u>MUC5AC</u>    | 0.976 | 0.005 | <u>CHODL</u>     |
| 0.964 | 0.004 | <u>CEP192</u>    | 0.975 | 0.005 | <u>SLC5A1</u>    |
| 0.965 | 0.005 | <u>ZNF500</u>    | 0.975 | 0.005 | <u>RPL23AP32</u> |
| 0.965 | 0.005 | <u>RPL27A</u>    | 0.975 | 0.004 | <u>ALOX15B</u>   |
| 0.964 | 0.005 | <u>TMEM33</u>    | 0.980 | 0.009 | <u>M6PR</u>      |
| 0.964 | 0.005 | <u>RPS10</u>     | 0.975 | 0.005 | <u>RHOT1</u>     |
| 0.963 | 0.005 | <u>MAT2A</u>     | 0.975 | 0.005 | <u>CSTF1</u>     |
| 0.961 | 0.004 | <u>MAML1</u>     | 0.975 | 0.004 | <u>CTSC</u>      |
| 0.967 | 0.010 | <u>SPTLC1</u>    | 0.975 | 0.005 | <u>INF2</u>      |

|       |       |          |       |       |              |
|-------|-------|----------|-------|-------|--------------|
| 0.961 | 0.005 | ZNF238   | 0.978 | 0.008 | OR1F1        |
| 0.961 | 0.005 | HDLBP    | 0.975 | 0.005 | RGS9         |
| 0.961 | 0.005 | RPL12    | 0.975 | 0.005 | PAQR4        |
| 0.960 | 0.005 | EIF2S2   | 0.977 | 0.007 | DCN          |
| 0.961 | 0.005 | KIAA0649 | 0.975 | 0.004 | SF1          |
| 0.965 | 0.009 | PALLD    | 0.975 | 0.004 | BOLA1        |
| 0.960 | 0.004 | FLOT1    | 0.975 | 0.005 | HIST1H1B     |
| 0.959 | 0.004 | HIF1AN   | 0.975 | 0.005 | PDZRN4       |
| 0.961 | 0.006 | ANAPC2   | 0.975 | 0.005 | GPR153       |
| 0.959 | 0.004 | TMEM57   | 0.975 | 0.005 | MCFD2        |
| 0.959 | 0.005 | RPL23A   | 0.976 | 0.006 | ANK1         |
| 0.958 | 0.005 | AIFM1    | 0.976 | 0.006 | RAB2A        |
| 0.959 | 0.006 | RPL13A   | 0.974 | 0.005 | SMC2         |
| 0.957 | 0.005 | RPL36A   | 0.974 | 0.005 | TMEM176A     |
| 0.957 | 0.005 | TUBD1    | 0.977 | 0.007 | RDH11        |
| 0.957 | 0.005 | HMGN1    | 0.974 | 0.005 | GGT1         |
| 0.958 | 0.006 | VEZF1    | 0.974 | 0.005 | TMEM59L      |
| 0.956 | 0.005 | LPGAT1   | 0.974 | 0.004 | PARN         |
| 0.959 | 0.008 | UOCC     | 0.974 | 0.005 | C14ORF79     |
| 0.955 | 0.004 | USP39    | 0.973 | 0.004 | FN3KRP       |
| 0.955 | 0.005 | CACYBP   | 0.974 | 0.005 | MTSS1        |
| 0.954 | 0.003 | CUTC     | 0.974 | 0.005 | FLJ22184     |
| 0.959 | 0.009 | H3F3B    | 0.973 | 0.004 | SLCO4A1      |
| 0.955 | 0.005 | DERL1    | 0.974 | 0.005 | BDNF         |
| 0.955 | 0.005 | RAD23B   | 0.973 | 0.004 | KCTD3        |
| 0.956 | 0.007 | MRPL40   | 0.973 | 0.005 | APOC1        |
| 0.956 | 0.007 | AIMP2    | 0.973 | 0.005 | VPREB3       |
| 0.954 | 0.005 | CGRRF1   | 0.972 | 0.005 | FZD6         |
| 0.952 | 0.004 | ADAM17   | 0.973 | 0.005 | D4S234E      |
| 0.957 | 0.008 | ATP6V1H  | 0.972 | 0.005 | PMEL         |
| 0.952 | 0.004 | C10ORF26 | 0.973 | 0.005 | PHF20L1      |
| 0.952 | 0.005 | ARCN1    | 0.972 | 0.004 | EGFL6        |
| 0.952 | 0.005 | MAPT     | 0.972 | 0.005 | NUBP1        |
| 0.964 | 0.017 | BRD2     | 0.974 | 0.007 | PPP2R1B      |
| 0.951 | 0.005 | SERPINB6 | 0.972 | 0.005 | PROZ         |
| 0.951 | 0.005 | ATP5B    | 0.974 | 0.007 | SH3GL3       |
| 0.950 | 0.005 | RIPK2    | 0.973 | 0.006 | DNASE1L2     |
| 0.950 | 0.005 | KIF18A   | 0.972 | 0.005 | CSNK2A2      |
| 0.950 | 0.005 | BAG6     | 0.972 | 0.005 | PCBP3        |
| 0.947 | 0.004 | EMD      | 0.971 | 0.004 | LOC100506168 |
| 0.948 | 0.005 | SLBP     | 0.971 | 0.005 | DMXL1        |
| 0.947 | 0.005 | MLH1     | 0.975 | 0.008 | TAPBPL       |
| 0.954 | 0.013 | TGOLN2   | 0.971 | 0.005 | PAF1         |
| 0.946 | 0.005 | TOR3A    | 0.972 | 0.005 | PSKH1        |
| 0.946 | 0.005 | SHMT2    | 0.971 | 0.005 | MUC2         |
| 0.950 | 0.010 | SNRNP27  | 0.971 | 0.004 | ZNF180       |
| 0.947 | 0.006 | MARS     | 0.971 | 0.005 | ARHGAP17     |

|       |       |                  |       |       |                 |
|-------|-------|------------------|-------|-------|-----------------|
| 0.948 | 0.009 | <u>DUSP3</u>     | 0.972 | 0.006 | <u>NUMA1</u>    |
| 0.946 | 0.007 | <u>SNX11</u>     | 0.970 | 0.004 | <u>GTF3C1</u>   |
| 0.947 | 0.008 | <u>SUMO3</u>     | 0.971 | 0.005 | <u>ESPN</u>     |
| 0.943 | 0.005 | <u>SIGIRR</u>    | 0.970 | 0.005 | <u>LPHN2</u>    |
| 0.943 | 0.007 | <u>LAMP1</u>     | 0.971 | 0.005 | <u>DLG1</u>     |
| 0.942 | 0.006 | <u>UBE2D3</u>    | 0.971 | 0.005 | <u>ARSI</u>     |
| 0.941 | 0.005 | <u>TAF5</u>      | 0.968 | 0.003 | <u>NDUFAB1</u>  |
| 0.940 | 0.005 | <u>TIMM17B</u>   | 0.971 | 0.006 | <u>SCN1A</u>    |
| 0.940 | 0.005 | <u>SNX3</u>      | 0.974 | 0.008 | <u>GIF</u>      |
| 0.940 | 0.005 | <u>UCHL3</u>     | 0.970 | 0.005 | <u>PER3</u>     |
| 0.939 | 0.005 | <u>LOC388796</u> | 0.973 | 0.008 | <u>HTR1F</u>    |
| 0.942 | 0.009 | <u>CDR2L</u>     | 0.970 | 0.005 | <u>ARHGEF17</u> |
| 0.938 | 0.005 | <u>CHMP7</u>     | 0.969 | 0.004 | <u>PTPRU</u>    |
| 0.936 | 0.007 | <u>TRIM44</u>    | 0.971 | 0.006 | <u>PRDX2</u>    |
| 0.934 | 0.005 | <u>SH3BGRL3</u>  | 0.969 | 0.004 | <u>SLC22A3</u>  |
| 0.938 | 0.009 | <u>MYL6B</u>     | 0.970 | 0.006 | <u>FAM86C1</u>  |
| 0.938 | 0.009 | <u>RANGRF</u>    | 0.969 | 0.005 | <u>SLC35A1</u>  |
| 0.936 | 0.010 | <u>MTX2</u>      | 0.968 | 0.005 | <u>CORO7</u>    |
| 0.937 | 0.011 | <u>FUBP1</u>     | 0.971 | 0.008 | <u>MAP3K8</u>   |
| 0.930 | 0.004 | <u>WFS1</u>      | 0.968 | 0.005 | <u>TELO2</u>    |
| 0.929 | 0.005 | <u>CBFB</u>      | 0.968 | 0.005 | <u>IBTK</u>     |
| 0.932 | 0.008 | <u>ABCF2</u>     | 0.966 | 0.003 | <u>GPX1</u>     |
| 0.934 | 0.012 | <u>PDCD4</u>     | 0.968 | 0.005 | <u>AQP7</u>     |
| 0.927 | 0.005 | <u>ADH5</u>      | 0.967 | 0.005 | <u>IGF2R</u>    |
| 0.926 | 0.005 | <u>FAM171A1</u>  | 0.968 | 0.005 | <u>C3ORF18</u>  |
| 0.929 | 0.008 | <u>RPL22</u>     | 0.968 | 0.005 | <u>RB1</u>      |
| 0.927 | 0.006 | <u>UBA52</u>     | 0.967 | 0.005 | <u>CHD9</u>     |
| 0.932 | 0.012 | <u>UBE2D2</u>    | 0.967 | 0.005 | <u>VPS33B</u>   |
| 0.925 | 0.005 | <u>GTF2A2</u>    | 0.967 | 0.005 | <u>HOXA7</u>    |
| 0.931 | 0.011 | <u>SOX4</u>      | 0.968 | 0.006 | <u>SCAPER</u>   |
| 0.930 | 0.011 | <u>TMEM161A</u>  | 0.969 | 0.007 | <u>ROD1</u>     |
| 0.923 | 0.005 | <u>C9ORF40</u>   | 0.967 | 0.005 | <u>PPP1CB</u>   |
| 0.929 | 0.013 | <u>FAU</u>       | 0.967 | 0.005 | <u>XBP1</u>     |
| 0.921 | 0.005 | <u>MRPL16</u>    | 0.967 | 0.005 | <u>CALCB</u>    |
| 0.921 | 0.005 | <u>MORC2</u>     | 0.967 | 0.005 | <u>BAIAP3</u>   |
| 0.936 | 0.022 | <u>PSMG2</u>     | 0.966 | 0.004 | <u>ANKRD49</u>  |
| 0.918 | 0.004 | <u>WNT5A</u>     | 0.966 | 0.004 | <u>GADD45G</u>  |
| 0.928 | 0.015 | <u>ZNF207</u>    | 0.966 | 0.005 | <u>ZC3H4</u>    |
| 0.920 | 0.008 | <u>MAK16</u>     | 0.966 | 0.005 | <u>TUBB4</u>    |
| 0.925 | 0.013 | <u>KPNA6</u>     | 0.969 | 0.007 | <u>TNFAIP2</u>  |
| 0.922 | 0.014 | <u>PIGG</u>      | 0.966 | 0.005 | <u>SF3B3</u>    |
| 0.917 | 0.009 | <u>SMARCE1</u>   | 0.966 | 0.005 | <u>ZNF93</u>    |
| 0.927 | 0.020 | <u>DOM3Z</u>     | 0.970 | 0.008 | <u>TUBAL3</u>   |
| 0.917 | 0.012 | <u>TMBIM6</u>    | 0.966 | 0.005 | <u>PLAC1</u>    |
| 0.907 | 0.004 | <u>CNPPD1</u>    | 0.966 | 0.005 | <u>FASTKD2</u>  |
| 0.912 | 0.010 | <u>ASPM</u>      | 0.965 | 0.005 | <u>SCD5</u>     |
| 0.908 | 0.007 | <u>C4ORF27</u>   | 0.964 | 0.004 | <u>RPN1</u>     |

|       |       |                 |       |       |                     |
|-------|-------|-----------------|-------|-------|---------------------|
| 0.908 | 0.008 | <u>DDX50</u>    | 0.966 | 0.005 | <u>PRODH2</u>       |
| 0.912 | 0.012 | <u>HLA-C</u>    | 0.964 | 0.004 | <u>AP4M1</u>        |
| 0.908 | 0.010 | <u>LSM7</u>     | 0.967 | 0.007 | <u>FAM125B</u>      |
| 0.906 | 0.010 | <u>MRPS18B</u>  | 0.965 | 0.005 | <u>GNAZ</u>         |
| 0.908 | 0.012 | <u>BSDC1</u>    | 0.964 | 0.004 | <u>CDC42BPB</u>     |
| 0.905 | 0.009 | <u>LEPROTL1</u> | 0.968 | 0.008 | <u>NPPA</u>         |
| 0.908 | 0.012 | <u>TXLNA</u>    | 0.967 | 0.007 | <u>CXCR4</u>        |
| 0.899 | 0.005 | <u>PGRMC2</u>   | 0.964 | 0.004 | <u>ACADL</u>        |
| 0.898 | 0.005 | <u>PFKM</u>     | 0.965 | 0.005 | <u>GNB2</u>         |
| 0.908 | 0.015 | <u>STK25</u>    | 0.969 | 0.010 | <u>MUC3A</u>        |
| 0.897 | 0.005 | <u>PARP4</u>    | 0.967 | 0.008 | <u>MASP2</u>        |
| 0.906 | 0.014 | <u>WDTC1</u>    | 0.967 | 0.008 | <u>TAF9B</u>        |
| 0.914 | 0.023 | <u>TOMM20</u>   | 0.968 | 0.009 | <u>VIL1</u>         |
| 0.899 | 0.008 | <u>CKAP5</u>    | 0.964 | 0.005 | <u>CDCP1</u>        |
| 0.904 | 0.013 | <u>NUDT9</u>    | 0.965 | 0.006 | <u>HN1L</u>         |
| 0.901 | 0.013 | <u>YKT6</u>     | 0.967 | 0.008 | <u>PLAG1</u>        |
| 0.892 | 0.004 | <u>APPL1</u>    | 0.964 | 0.005 | <u>VAPB</u>         |
| 0.893 | 0.006 | <u>SMYD5</u>    | 0.964 | 0.005 | <u>SLC17A6</u>      |
| 0.916 | 0.031 | <u>TTC3</u>     | 0.964 | 0.005 | <u>NEFH</u>         |
| 0.898 | 0.014 | <u>RPL35</u>    | 0.964 | 0.005 | <u>PSD3</u>         |
| 0.900 | 0.017 | <u>SORBS3</u>   | 0.964 | 0.005 | <u>RAPGEF2</u>      |
| 0.895 | 0.012 | <u>PTCD3</u>    | 0.964 | 0.005 | <u>RSU1</u>         |
| 0.892 | 0.009 | <u>WDR18</u>    | 0.963 | 0.005 | <u>ERCC6L</u>       |
| 0.897 | 0.014 | <u>RPS27A</u>   | 0.963 | 0.005 | <u>TRAF3IP3</u>     |
| 0.895 | 0.013 | <u>PTPN3</u>    | 0.966 | 0.008 | <u>CAPN6</u>        |
| 0.901 | 0.019 | <u>ATG4B</u>    | 0.965 | 0.007 | <u>CAPN5</u>        |
| 0.897 | 0.016 | <u>PGRMC1</u>   | 0.962 | 0.004 | <u>SETD3</u>        |
| 0.895 | 0.014 | <u>FAM32A</u>   | 0.963 | 0.005 | <u>FAM70A</u>       |
| 0.890 | 0.009 | <u>UBL4A</u>    | 0.962 | 0.005 | <u>SRRM1</u>        |
| 0.899 | 0.019 | <u>PHB</u>      | 0.962 | 0.005 | <u>ETS1</u>         |
| 0.894 | 0.015 | <u>VBP1</u>     | 0.962 | 0.004 | <u>SSB</u>          |
| 0.891 | 0.013 | <u>RPL30</u>    | 0.962 | 0.005 | <u>ZNF512B</u>      |
| 0.883 | 0.005 | <u>CCDC22</u>   | 0.962 | 0.005 | <u>TIPARP</u>       |
| 0.896 | 0.017 | <u>EIF3G</u>    | 0.962 | 0.005 | <u>MTHFSD</u>       |
| 0.892 | 0.014 | <u>CCNB1IP1</u> | 0.961 | 0.004 | <u>CISH</u>         |
| 0.893 | 0.017 | <u>MAP4</u>     | 0.963 | 0.006 | <u>TBC1D9B</u>      |
| 0.880 | 0.007 | <u>GNG12</u>    | 0.964 | 0.007 | <u>MEFV</u>         |
| 0.880 | 0.008 | <u>ZNF576</u>   | 0.965 | 0.009 | <u>ATXN3</u>        |
| 0.887 | 0.015 | <u>LRRC59</u>   | 0.965 | 0.008 | <u>SLC6A7</u>       |
| 0.878 | 0.007 | <u>EPB41L2</u>  | 0.967 | 0.011 | <u>RIMBP2</u>       |
| 0.882 | 0.012 | <u>XPO7</u>     | 0.965 | 0.009 | <u>STOML1</u>       |
| 0.893 | 0.023 | <u>PTPN2</u>    | 0.961 | 0.005 | <u>ARF6</u>         |
| 0.883 | 0.014 | <u>NFKBIA</u>   | 0.961 | 0.005 | <u>TCL1A</u>        |
| 0.884 | 0.019 | <u>AQP3</u>     | 0.961 | 0.005 | <u>LOC100129250</u> |
| 0.882 | 0.017 | <u>NUDT1</u>    | 0.961 | 0.005 | <u>RLN1</u>         |
| 0.883 | 0.019 | <u>STMN1</u>    | 0.963 | 0.007 | <u>MS4A1</u>        |
| 0.886 | 0.024 | <u>SUGP2</u>    | 0.961 | 0.005 | <u>UBR2</u>         |

|       |       |                     |       |       |                  |
|-------|-------|---------------------|-------|-------|------------------|
| 0.884 | 0.022 | <u>LUC7L3</u>       | 0.961 | 0.005 | <u>SOX3</u>      |
| 0.879 | 0.018 | <u>CCNF</u>         | 0.960 | 0.005 | <u>IVNS1ABP</u>  |
| 0.875 | 0.015 | <u>FAM60A</u>       | 0.960 | 0.005 | <u>FAM63B</u>    |
| 0.872 | 0.014 | <u>IARS</u>         | 0.960 | 0.005 | <u>FBXL4</u>     |
| 0.867 | 0.012 | <u>SF3A3</u>        | 0.964 | 0.009 | <u>PTPN21</u>    |
| 0.873 | 0.019 | <u>RPL7A</u>        | 0.961 | 0.007 | <u>CEBPD</u>     |
| 0.874 | 0.021 | <u>FNTA</u>         | 0.965 | 0.010 | <u>ADRBK2</u>    |
| 0.870 | 0.017 | <u>TSPAN3</u>       | 0.959 | 0.005 | <u>DDIT4</u>     |
| 0.870 | 0.018 | <u>NCK1</u>         | 0.969 | 0.015 | <u>C19ORF2</u>   |
| 0.876 | 0.024 | <u>PUS7</u>         | 0.960 | 0.007 | <u>PIN1P1</u>    |
| 0.867 | 0.016 | <u>TCEA2</u>        | 0.959 | 0.005 | <u>C22ORF29</u>  |
| 0.860 | 0.009 | <u>COG4</u>         | 0.961 | 0.007 | <u>TRIM48</u>    |
| 0.859 | 0.010 | <u>EXOSC5</u>       | 0.958 | 0.005 | <u>HIST1H2AE</u> |
| 0.866 | 0.016 | <u>PTS</u>          | 0.960 | 0.007 | <u>LASP1</u>     |
| 0.865 | 0.016 | <u>FTL</u>          | 0.957 | 0.004 | <u>BPTF</u>      |
| 0.878 | 0.029 | <u>XRCC5</u>        | 0.965 | 0.012 | <u>DACH1</u>     |
| 0.865 | 0.017 | <u>MAST2</u>        | 0.957 | 0.004 | <u>ENOPH1</u>    |
| 0.868 | 0.021 | <u>CERS6</u>        | 0.956 | 0.004 | <u>DUSP12</u>    |
| 0.856 | 0.012 | <u>STX4</u>         | 0.960 | 0.008 | <u>INSRR</u>     |
| 0.862 | 0.021 | <u>ATP6V0E1</u>     | 0.959 | 0.007 | <u>IL1R2</u>     |
| 0.858 | 0.018 | <u>RPL9</u>         | 0.961 | 0.009 | <u>DNAJC4</u>    |
| 0.842 | 0.008 | <u>PTGES2</u>       | 0.958 | 0.005 | <u>MYO1D</u>     |
| 0.850 | 0.021 | <u>ABHD10</u>       | 0.961 | 0.008 | <u>IL18</u>      |
| 0.850 | 0.023 | <u>RPS12</u>        | 0.959 | 0.007 | <u>C2ORF67</u>   |
| 0.852 | 0.027 | <u>RPS4X</u>        | 0.957 | 0.005 | <u>TOPORS</u>    |
| 0.844 | 0.022 | <u>CSK</u>          | 0.961 | 0.009 | <u>IPW</u>       |
| 0.848 | 0.027 | <u>UBE2C</u>        | 0.957 | 0.005 | <u>POGZ</u>      |
| 0.841 | 0.022 | <u>C20ORF111</u>    | 0.958 | 0.006 | <u>MMP15</u>     |
| 0.845 | 0.029 | <u>PSMA2</u>        | 0.960 | 0.009 | <u>RELN</u>      |
| 0.835 | 0.023 | <u>TMEM93</u>       | 0.956 | 0.004 | <u>EIF2S1</u>    |
| 0.830 | 0.020 | <u>RPS13</u>        | 0.960 | 0.009 | <u>BMP5</u>      |
| 0.840 | 0.031 | <u>MED13</u>        | 0.956 | 0.005 | <u>MIS18BP1</u>  |
| 0.822 | 0.017 | <u>LOC100129361</u> | 0.957 | 0.006 | <u>DPF1</u>      |
| 0.832 | 0.028 | <u>RPLP0</u>        | 0.958 | 0.008 | <u>CDKN2C</u>    |
| 0.827 | 0.023 | <u>EEF1A1</u>       | 0.954 | 0.003 | <u>SEMA4D</u>    |
| 0.832 | 0.031 | <u>TCEB1</u>        | 0.954 | 0.004 | <u>CRP</u>       |
| 0.830 | 0.028 | <u>RPSA</u>         | 0.955 | 0.005 | <u>EIF3L</u>     |
| 0.814 | 0.014 | <u>PLK1</u>         | 0.955 | 0.005 | <u>TMEM100</u>   |
| 0.841 | 0.041 | <u>NFE2L1</u>       | 0.954 | 0.005 | <u>TMEM132A</u>  |
| 0.809 | 0.013 | <u>RRP9</u>         | 0.958 | 0.009 | <u>WDR25</u>     |
| 0.817 | 0.022 | <u>RUFY1</u>        | 0.958 | 0.009 | <u>ACSBG2</u>    |
| 0.830 | 0.037 | <u>SURF1</u>        | 0.953 | 0.005 | <u>PTCD1</u>     |
| 0.822 | 0.029 | <u>RPL23</u>        | 0.955 | 0.007 | <u>UGT2B28</u>   |
| 0.832 | 0.039 | <u>CPT2</u>         | 0.953 | 0.005 | <u>UBTD1</u>     |
| 0.819 | 0.026 | <u>HLA-F</u>        | 0.953 | 0.005 | <u>IDH3A</u>     |
| 0.803 | 0.014 | <u>RAB4A</u>        | 0.952 | 0.004 | <u>FBXL8</u>     |
| 0.817 | 0.029 | <u>MMADHC</u>       | 0.952 | 0.004 | <u>PGS1</u>      |

|       |       |                 |       |       |                   |
|-------|-------|-----------------|-------|-------|-------------------|
| 0.810 | 0.028 | <u>TBC1D9B</u>  | 0.952 | 0.004 | <u>RFPL2</u>      |
| 0.814 | 0.034 | <u>SLC25A46</u> | 0.953 | 0.006 | <u>SEC24D</u>     |
| 0.806 | 0.027 | <u>ILKAP</u>    | 0.952 | 0.005 | <u>SLC25A37</u>   |
| 0.805 | 0.026 | <u>SNRNP40</u>  | 0.957 | 0.010 | <u>INPP4A</u>     |
| 0.810 | 0.033 | <u>PEX11A</u>   | 0.956 | 0.010 | <u>CASP6</u>      |
| 0.797 | 0.024 | <u>OXA1L</u>    | 0.950 | 0.004 | <u>C11ORF58</u>   |
| 0.815 | 0.044 | <u>LRRFIP1</u>  | 0.960 | 0.014 | <u>PKNOX2</u>     |
| 0.799 | 0.030 | <u>PSMB8</u>    | 0.954 | 0.008 | <u>ANP32A-IT1</u> |
| 0.800 | 0.033 | <u>RHOT1</u>    | 0.955 | 0.009 | <u>RNF186</u>     |
| 0.801 | 0.034 | <u>RBM6</u>     | 0.955 | 0.009 | <u>CASP10</u>     |
| 0.788 | 0.021 | <u>TP53</u>     | 0.950 | 0.004 | <u>CKB</u>        |
| 0.811 | 0.046 | <u>ANAPC5</u>   | 0.953 | 0.008 | <u>ANKRD36</u>    |
| 0.788 | 0.027 | <u>ISOC2</u>    | 0.950 | 0.005 | <u>DNMT3L</u>     |
| 0.794 | 0.033 | <u>EEF1B2</u>   | 0.953 | 0.007 | <u>SMG7</u>       |
| 0.784 | 0.027 | <u>RPS29</u>    | 0.951 | 0.006 | <u>FLJ13197</u>   |
| 0.809 | 0.054 | <u>MPDZ</u>     | 0.951 | 0.006 | <u>NDUFA5</u>     |
| 0.780 | 0.025 | <u>RPL6</u>     | 0.956 | 0.011 | <u>RNF24</u>      |
| 0.779 | 0.027 | <u>MTCP1NB</u>  | 0.952 | 0.007 | <u>EMR2</u>       |
| 0.777 | 0.025 | <u>SESN1</u>    | 0.948 | 0.004 | <u>ACAD8</u>      |
| 0.789 | 0.038 | <u>NUP62</u>    | 0.954 | 0.010 | <u>ZNF132</u>     |
| 0.770 | 0.020 | <u>FJX1</u>     | 0.949 | 0.005 | <u>SIM1</u>       |
| 0.774 | 0.027 | <u>TCTA</u>     | 0.949 | 0.005 | <u>TMEM22</u>     |
| 0.771 | 0.026 | <u>PPIE</u>     | 0.958 | 0.014 | <u>ARHGDIA</u>    |
| 0.787 | 0.044 | <u>ARL6IP4</u>  | 0.957 | 0.013 | <u>LOC440792</u>  |
| 0.789 | 0.048 | <u>RPL17</u>    | 0.952 | 0.009 | <u>TMPO</u>       |
| 0.772 | 0.035 | <u>DDX56</u>    | 0.953 | 0.009 | <u>TPD52</u>      |
| 0.800 | 0.065 | <u>C8ORF33</u>  | 0.947 | 0.004 | <u>ITM2B</u>      |
| 0.790 | 0.057 | <u>THOC2</u>    | 0.955 | 0.012 | <u>GLI1</u>       |
| 0.775 | 0.043 | <u>BLVRA</u>    | 0.950 | 0.007 | <u>FOXC2</u>      |
| 0.770 | 0.039 | <u>UBE2S</u>    | 0.948 | 0.005 | <u>GYG2</u>       |
| 0.763 | 0.038 | <u>BNIP3</u>    | 0.948 | 0.005 | <u>RXRG</u>       |
| 0.779 | 0.054 | <u>NKTR</u>     | 0.957 | 0.014 | <u>CSF2</u>       |
| 0.766 | 0.046 | <u>RPL38</u>    | 0.953 | 0.011 | <u>DSC1</u>       |
| 0.752 | 0.035 | <u>RPL24</u>    | 0.952 | 0.010 | <u>RREB1</u>      |
| 0.758 | 0.045 | <u>SMARCA4</u>  | 0.947 | 0.006 | <u>ZNF177</u>     |
| 0.729 | 0.018 | <u>RRP1</u>     | 0.945 | 0.004 | <u>GMFG</u>       |
| 0.736 | 0.027 | <u>HAUS7</u>    | 0.946 | 0.005 | <u>EPHA4</u>      |
| 0.743 | 0.035 | <u>SNX6</u>     | 0.950 | 0.009 | <u>SLC1A6</u>     |
| 0.743 | 0.036 | <u>DUSP6</u>    | 0.949 | 0.008 | <u>TPO</u>        |
| 0.745 | 0.050 | <u>UQCR11</u>   | 0.951 | 0.010 | <u>NMT2</u>       |
| 0.733 | 0.045 | <u>EEF1G</u>    | 0.947 | 0.006 | <u>LITD1</u>      |
| 0.756 | 0.068 | <u>HMOX2</u>    | 0.948 | 0.008 | <u>ZNF493</u>     |
| 0.730 | 0.047 | <u>ECH1</u>     | 0.945 | 0.005 | <u>MIOS</u>       |
| 0.741 | 0.060 | <u>HNRNPA1</u>  | 0.947 | 0.007 | <u>CD47</u>       |
| 0.719 | 0.048 | <u>GADD45A</u>  | 0.944 | 0.004 | <u>PSMA6</u>      |
| 0.732 | 0.066 | <u>PAM16</u>    | 0.945 | 0.005 | <u>AP1AR</u>      |
| 0.726 | 0.060 | <u>RPS20</u>    | 0.945 | 0.005 | <u>SNRPN</u>      |

|       |       |                  |       |       |                 |
|-------|-------|------------------|-------|-------|-----------------|
| 0.719 | 0.059 | <u>PDCL</u>      | 0.951 | 0.012 | <u>FLJ20712</u> |
| 0.720 | 0.062 | <u>SMNDC1</u>    | 0.950 | 0.011 | <u>NADSYN1</u>  |
| 0.702 | 0.049 | <u>RPL13</u>     | 0.944 | 0.005 | <u>CDX1</u>     |
| 0.693 | 0.041 | <u>FLNB</u>      | 0.945 | 0.006 | <u>EAF2</u>     |
| 0.702 | 0.054 | <u>RPS9</u>      | 0.944 | 0.005 | <u>ZNF43</u>    |
| 0.692 | 0.045 | <u>GTF2E2</u>    | 0.948 | 0.009 | <u>SNAPC3</u>   |
| 0.686 | 0.041 | <u>NCK2</u>      | 0.947 | 0.009 | <u>TTC28</u>    |
| 0.686 | 0.051 | <u>PSMD3</u>     | 0.950 | 0.012 | <u>HNF4G</u>    |
| 0.695 | 0.061 | <u>CLSTN1</u>    | 0.947 | 0.010 | <u>CTNNA1</u>   |
| 0.705 | 0.072 | <u>STARD7</u>    | 0.942 | 0.005 | <u>C4ORF29</u>  |
| 0.685 | 0.053 | <u>DCK</u>       | 0.942 | 0.005 | <u>EFHC1</u>    |
| 0.705 | 0.074 | <u>NACA</u>      | 0.948 | 0.011 | <u>HPS4</u>     |
| 0.683 | 0.053 | <u>NMT1</u>      | 0.945 | 0.009 | <u>KDELR2</u>   |
| 0.692 | 0.066 | <u>RPS16</u>     | 0.947 | 0.011 | <u>TRIM17</u>   |
| 0.678 | 0.055 | <u>MAPK9</u>     | 0.952 | 0.016 | <u>NUCB1</u>    |
| 0.682 | 0.062 | <u>CHERP</u>     | 0.949 | 0.013 | <u>RASL10A</u>  |
| 0.664 | 0.046 | <u>NT5DC2</u>    | 0.946 | 0.010 | <u>INVS</u>     |
| 0.676 | 0.058 | <u>PARP2</u>     | 0.943 | 0.007 | <u>CYFIP2</u>   |
| 0.670 | 0.071 | <u>YTHDF1</u>    | 0.944 | 0.009 | <u>FUT7</u>     |
| 0.651 | 0.053 | <u>GEMIN4</u>    | 0.945 | 0.010 | <u>ACAA2</u>    |
| 0.653 | 0.059 | <u>ARFIP2</u>    | 0.941 | 0.007 | <u>MARK3</u>    |
| 0.673 | 0.081 | <u>TSGA10</u>    | 0.938 | 0.003 | <u>JTB</u>      |
| 0.668 | 0.081 | <u>RPS2</u>      | 0.946 | 0.012 | <u>DZIP1</u>    |
| 0.649 | 0.062 | <u>CHKB</u>      | 0.947 | 0.013 | <u>APC</u>      |
| 0.656 | 0.075 | <u>AURKA</u>     | 0.943 | 0.009 | <u>SCAI</u>     |
| 0.633 | 0.055 | <u>GALE</u>      | 0.941 | 0.007 | <u>SLC9A2</u>   |
| 0.651 | 0.074 | <u>CHN1</u>      | 0.938 | 0.004 | <u>HERPUD1</u>  |
| 0.666 | 0.092 | <u>LINC00472</u> | 0.945 | 0.011 | <u>KIR2DL1</u>  |
| 0.638 | 0.064 | <u>FBXO7</u>     | 0.945 | 0.011 | <u>PTPN7</u>    |
| 0.668 | 0.098 | <u>ATIC</u>      | 0.953 | 0.020 | <u>GRPR</u>     |
| 0.597 | 0.027 | <u>C22ORF36</u>  | 0.938 | 0.005 | <u>PGF</u>      |
| 0.641 | 0.077 | <u>H2BFS</u>     | 0.941 | 0.008 | <u>CCDC121</u>  |
| 0.667 | 0.110 | <u>GAPVD1</u>    | 0.938 | 0.005 | <u>TCIRG1</u>   |
| 0.640 | 0.083 | <u>UBA2</u>      | 0.939 | 0.007 | <u>HIST3H3</u>  |
| 0.605 | 0.056 | <u>FOXO3</u>     | 0.937 | 0.005 | <u>GMFB</u>     |
| 0.627 | 0.079 | <u>PHGDH</u>     | 0.937 | 0.005 | <u>CITED2</u>   |
| 0.640 | 0.096 | <u>DAG1</u>      | 0.937 | 0.005 | <u>RECQL</u>    |
| 0.633 | 0.089 | <u>RPL14</u>     | 0.946 | 0.014 | <u>ACRV1</u>    |
| 0.659 | 0.116 | <u>ZNHIT6</u>    | 0.941 | 0.009 | <u>EPHA7</u>    |
| 0.635 | 0.093 | <u>EHHADH</u>    | 0.940 | 0.009 | <u>ARAP1</u>    |
| 0.617 | 0.086 | <u>PDS5A</u>     | 0.936 | 0.005 | <u>YEATS4</u>   |
| 0.606 | 0.076 | <u>MRPS27</u>    | 0.935 | 0.005 | <u>HAUS6</u>    |
| 0.608 | 0.086 | <u>NENF</u>      | 0.944 | 0.013 | <u>CDH11</u>    |
| 0.588 | 0.067 | <u>ARHGAP15</u>  | 0.946 | 0.015 | <u>LCN1</u>     |
| 0.594 | 0.085 | <u>PLCB3</u>     | 0.941 | 0.010 | <u>TRIL</u>     |
| 0.601 | 0.105 | <u>EPRS</u>      | 0.935 | 0.004 | <u>TCEB1</u>    |
| 0.605 | 0.111 | <u>ATP5G3</u>    | 0.935 | 0.005 | <u>DBNDD1</u>   |

|       |       |                 |       |       |                  |
|-------|-------|-----------------|-------|-------|------------------|
| 0.532 | 0.038 | <u>TRIM17</u>   | 0.936 | 0.006 | <u>TEP1</u>      |
| 0.591 | 0.100 | <u>COL9A3</u>   | 0.933 | 0.004 | <u>TMPRSS2</u>   |
| 0.572 | 0.083 | <u>UBQLN2</u>   | 0.936 | 0.007 | <u>HLA-DPB1</u>  |
| 0.590 | 0.103 | <u>PDCD5</u>    | 0.939 | 0.010 | <u>LRRC48</u>    |
| 0.558 | 0.077 | <u>PRG4</u>     | 0.933 | 0.005 | <u>PLEKHA8P1</u> |
| 0.555 | 0.078 | <u>DNAJA4</u>   | 0.940 | 0.012 | <u>DUS2L</u>     |
| 0.566 | 0.090 | <u>CLCN5</u>    | 0.946 | 0.018 | <u>HOXC5</u>     |
| 0.548 | 0.075 | <u>PPP2R5A</u>  | 0.936 | 0.009 | <u>CAPN9</u>     |
| 0.577 | 0.110 | <u>PSAT1</u>    | 0.931 | 0.003 | <u>CTNBL1</u>    |
| 0.576 | 0.116 | <u>CAPNS1</u>   | 0.931 | 0.005 | <u>DYNLT1</u>    |
| 0.595 | 0.135 | <u>PSMA7</u>    | 0.941 | 0.015 | <u>NAALAD2</u>   |
| 0.554 | 0.096 | <u>RNMT</u>     | 0.942 | 0.017 | <u>FNTB</u>      |
| 0.606 | 0.152 | <u>SOD3</u>     | 0.932 | 0.007 | <u>UBN1</u>      |
| 0.557 | 0.106 | <u>DSG2</u>     | 0.939 | 0.013 | <u>HOXA3</u>     |
| 0.550 | 0.100 | <u>RBM15B</u>   | 0.940 | 0.015 | <u>INA</u>       |
| 0.554 | 0.106 | LOC100286895    | 0.941 | 0.016 | <u>CADM3</u>     |
| 0.573 | 0.127 | <u>PPP1R7</u>   | 0.935 | 0.011 | <u>NEURL</u>     |
| 0.539 | 0.102 | <u>CALM3</u>    | 0.941 | 0.017 | <u>POU2F1</u>    |
| 0.514 | 0.080 | <u>APLNR</u>    | 0.938 | 0.014 | <u>MCM4</u>      |
| 0.525 | 0.094 | <u>IER3</u>     | 0.933 | 0.010 | <u>CREB3L1</u>   |
| 0.527 | 0.098 | <u>HERPUD1</u>  | 0.930 | 0.007 | <u>NVL</u>       |
| 0.530 | 0.102 | <u>TMEM5</u>    | 0.929 | 0.007 | <u>MAGI1</u>     |
| 0.552 | 0.128 | <u>MBNL1</u>    | 0.932 | 0.009 | <u>PRKCI</u>     |
| 0.527 | 0.106 | <u>CTNNAL1</u>  | 0.930 | 0.008 | <u>PPP4R2</u>    |
| 0.525 | 0.105 | <u>CEACAM6</u>  | 0.939 | 0.017 | <u>GUCY2C</u>    |
| 0.555 | 0.138 | <u>NUDCD3</u>   | 0.930 | 0.008 | <u>MOSPD3</u>    |
| 0.573 | 0.156 | <u>MPZ</u>      | 0.926 | 0.005 | <u>NUCB2</u>     |
| 0.517 | 0.101 | <u>SLC25A13</u> | 0.935 | 0.014 | <u>CD300C</u>    |
| 0.536 | 0.121 | <u>PLP1</u>     | 0.930 | 0.009 | LOC729799        |
| 0.527 | 0.116 | <u>WASF3</u>    | 0.933 | 0.013 | <u>EXOC7</u>     |
| 0.550 | 0.144 | <u>UNKL</u>     | 0.928 | 0.008 | <u>NGLY1</u>     |
| 0.525 | 0.119 | <u>KLHDC2</u>   | 0.926 | 0.006 | <u>LGI1</u>      |
| 0.556 | 0.151 | <u>KIAA1024</u> | 0.933 | 0.014 | <u>SRSF7</u>     |
| 0.523 | 0.126 | <u>S100A13</u>  | 0.925 | 0.006 | <u>NEDD4L</u>    |
| 0.517 | 0.123 | <u>UBR7</u>     | 0.925 | 0.007 | <u>SRD5A2</u>    |
| 0.529 | 0.137 | <u>KRT5</u>     | 0.932 | 0.014 | <u>GLCE</u>      |
| 0.526 | 0.135 | <u>KEAP1</u>    | 0.925 | 0.008 | <u>HIST1H2BM</u> |
| 0.577 | 0.188 | LOC100127972    | 0.931 | 0.013 | <u>CSRNP3</u>    |
| 0.542 | 0.155 | <u>KDEL2</u>    | 0.922 | 0.004 | <u>OR51E2</u>    |
| 0.503 | 0.123 | <u>XPNPEP1</u>  | 0.930 | 0.012 | <u>PYGL</u>      |
| 0.510 | 0.135 | <u>SLC26A4</u>  | 0.932 | 0.014 | <u>ATXN7</u>     |
| 0.508 | 0.136 | <u>ANXA7</u>    | 0.929 | 0.011 | <u>GLTSCR1</u>   |
| 0.515 | 0.148 | <u>TSN</u>      | 0.935 | 0.018 | <u>ARRB1</u>     |
| 0.519 | 0.155 | <u>NISCH</u>    | 0.924 | 0.008 | <u>CHST15</u>    |
| 0.539 | 0.179 | <u>CD19</u>     | 0.942 | 0.026 | <u>DMBT1</u>     |
| 0.514 | 0.164 | <u>SET</u>      | 0.926 | 0.009 | <u>PEG3</u>      |
| 0.508 | 0.165 | <u>PKD4</u>     | 0.935 | 0.019 | <u>ILVBL</u>     |

|  |       |       |                 |
|--|-------|-------|-----------------|
|  | 0.932 | 0.016 | <u>SATB2</u>    |
|  | 0.933 | 0.017 | <u>PDGFB</u>    |
|  | 0.932 | 0.016 | <u>AIM2</u>     |
|  | 0.920 | 0.005 | <u>PTBP2</u>    |
|  | 0.926 | 0.011 | <u>ELK4</u>     |
|  | 0.927 | 0.012 | <u>MBIP</u>     |
|  | 0.922 | 0.007 | <u>ICAM3</u>    |
|  | 0.932 | 0.018 | <u>LAT2</u>     |
|  | 0.928 | 0.014 | <u>GALNT8</u>   |
|  | 0.930 | 0.016 | <u>MYCN</u>     |
|  | 0.926 | 0.013 | <u>S100A3</u>   |
|  | 0.931 | 0.017 | <u>HNFA4</u>    |
|  | 0.923 | 0.010 | <u>ANKRD17</u>  |
|  | 0.918 | 0.005 | <u>XPO4</u>     |
|  | 0.924 | 0.012 | <u>MAN2A1</u>   |
|  | 0.918 | 0.006 | <u>ANXA2P3</u>  |
|  | 0.922 | 0.010 | <u>NCKAP1</u>   |
|  | 0.929 | 0.017 | <u>A4GALT</u>   |
|  | 0.927 | 0.016 | <u>KCNA4</u>    |
|  | 0.928 | 0.017 | <u>ACCN1</u>    |
|  | 0.922 | 0.012 | <u>PDE5A</u>    |
|  | 0.926 | 0.016 | <u>PPIL2</u>    |
|  | 0.920 | 0.011 | <u>TMEM231</u>  |
|  | 0.918 | 0.009 | <u>LRRC8E</u>   |
|  | 0.929 | 0.021 | <u>SLC16A8</u>  |
|  | 0.913 | 0.005 | <u>ZNF124</u>   |
|  | 0.912 | 0.005 | <u>UBE2D3</u>   |
|  | 0.920 | 0.013 | <u>CHRNA4</u>   |
|  | 0.922 | 0.016 | <u>ZBTB1</u>    |
|  | 0.915 | 0.009 | <u>RRAGA</u>    |
|  | 0.912 | 0.007 | <u>KLK14</u>    |
|  | 0.923 | 0.018 | <u>TSPAN9</u>   |
|  | 0.919 | 0.014 | <u>PBX1</u>     |
|  | 0.925 | 0.020 | <u>SLC26A3</u>  |
|  | 0.908 | 0.003 | <u>MFAP1</u>    |
|  | 0.918 | 0.013 | <u>NUP133</u>   |
|  | 0.923 | 0.020 | <u>GPR182</u>   |
|  | 0.922 | 0.021 | <u>SPRYD7</u>   |
|  | 0.908 | 0.007 | <u>WSCD1</u>    |
|  | 0.905 | 0.004 | <u>TMEM135</u>  |
|  | 0.913 | 0.013 | <u>PPP1R12A</u> |
|  | 0.923 | 0.023 | <u>IFT27</u>    |
|  | 0.919 | 0.019 | <u>MET</u>      |
|  | 0.921 | 0.022 | <u>CNGB3</u>    |
|  | 0.916 | 0.017 | <u>BCLAF1</u>   |
|  | 0.914 | 0.016 | <u>TAS2R7</u>   |
|  | 0.914 | 0.016 | <u>PCDHB11</u>  |

|  |       |       |                  |
|--|-------|-------|------------------|
|  | 0.910 | 0.012 | <u>KIF3B</u>     |
|  | 0.917 | 0.019 | <u>NPIPL3</u>    |
|  | 0.915 | 0.018 | <u>GPLD1</u>     |
|  | 0.918 | 0.021 | <u>GAS2L1</u>    |
|  | 0.917 | 0.020 | <u>PKP2</u>      |
|  | 0.908 | 0.012 | <u>ATXN7L1</u>   |
|  | 0.911 | 0.015 | <u>BMP1</u>      |
|  | 0.910 | 0.015 | <u>GPRC5B</u>    |
|  | 0.902 | 0.007 | <u>SMC5</u>      |
|  | 0.899 | 0.004 | <u>CD2AP</u>     |
|  | 0.900 | 0.006 | <u>FOS</u>       |
|  | 0.921 | 0.028 | <u>AMPD1</u>     |
|  | 0.910 | 0.016 | <u>HIST1H3I</u>  |
|  | 0.912 | 0.018 | <u>SKP2</u>      |
|  | 0.905 | 0.012 | <u>ZNF185</u>    |
|  | 0.901 | 0.009 | <u>CCL11</u>     |
|  | 0.902 | 0.010 | <u>ERG</u>       |
|  | 0.916 | 0.025 | <u>PAQR5</u>     |
|  | 0.909 | 0.017 | <u>BRE</u>       |
|  | 0.911 | 0.019 | <u>ADORA1</u>    |
|  | 0.900 | 0.010 | <u>B3GALNT1</u>  |
|  | 0.912 | 0.022 | <u>LINC00483</u> |
|  | 0.903 | 0.013 | <u>CDKL1</u>     |
|  | 0.899 | 0.010 | <u>ALDH7A1</u>   |
|  | 0.910 | 0.021 | <u>SH2D3C</u>    |
|  | 0.904 | 0.017 | <u>TYR</u>       |
|  | 0.902 | 0.015 | <u>KIAA0564</u>  |
|  | 0.908 | 0.021 | <u>STAG3L4</u>   |
|  | 0.903 | 0.016 | <u>NTRK1</u>     |
|  | 0.910 | 0.023 | <u>KAZN</u>      |
|  | 0.900 | 0.014 | <u>RPH3A</u>     |
|  | 0.913 | 0.027 | <u>CPLX2</u>     |
|  | 0.911 | 0.026 | <u>ANGPTL4</u>   |
|  | 0.898 | 0.013 | <u>LINC00342</u> |
|  | 0.895 | 0.010 | <u>DSC2</u>      |
|  | 0.899 | 0.015 | <u>UCP2</u>      |
|  | 0.900 | 0.016 | <u>CLDN15</u>    |
|  | 0.896 | 0.013 | <u>KIAA1109</u>  |
|  | 0.888 | 0.005 | <u>PRSS8</u>     |
|  | 0.887 | 0.005 | <u>PPP2R3C</u>   |
|  | 0.905 | 0.024 | <u>SPAST</u>     |
|  | 0.897 | 0.016 | <u>NRXN2</u>     |
|  | 0.899 | 0.019 | <u>RUNX2</u>     |
|  | 0.892 | 0.013 | <u>PAX6</u>      |
|  | 0.905 | 0.025 | <u>MLLT10</u>    |
|  | 0.887 | 0.008 | <u>FAM172A</u>   |
|  | 0.897 | 0.018 | <u>PRDM2</u>     |

|  |       |       |                 |
|--|-------|-------|-----------------|
|  | 0.896 | 0.018 | <u>CACNA2D1</u> |
|  | 0.904 | 0.026 | <u>EIF5A</u>    |
|  | 0.894 | 0.016 | <u>ZFYVE26</u>  |
|  | 0.897 | 0.019 | <u>NFASC</u>    |
|  | 0.897 | 0.020 | <u>CHRNA10</u>  |
|  | 0.901 | 0.024 | <u>C6ORF105</u> |
|  | 0.907 | 0.030 | <u>PRKAR1A</u>  |
|  | 0.890 | 0.014 | <u>FKBP4</u>    |
|  | 0.896 | 0.020 | <u>TRRAP</u>    |
|  | 0.897 | 0.021 | <u>DLL3</u>     |
|  | 0.900 | 0.025 | <u>PEX5</u>     |
|  | 0.897 | 0.022 | <u>IL24</u>     |
|  | 0.879 | 0.005 | <u>KIF18A</u>   |
|  | 0.880 | 0.006 | <u>FKBP1B</u>   |
|  | 0.892 | 0.020 | <u>DCAF17</u>   |
|  | 0.892 | 0.020 | <u>TSPAN2</u>   |
|  | 0.886 | 0.014 | <u>HK1</u>      |
|  | 0.888 | 0.016 | <u>TERT</u>     |
|  | 0.891 | 0.020 | <u>AFF2</u>     |
|  | 0.898 | 0.027 | <u>HNRNPH1</u>  |
|  | 0.894 | 0.023 | <u>GCK</u>      |
|  | 0.887 | 0.017 | <u>RAB27B</u>   |
|  | 0.893 | 0.024 | <u>THBS1</u>    |
|  | 0.899 | 0.030 | <u>VPS4B</u>    |
|  | 0.889 | 0.021 | <u>TRPC4</u>    |
|  | 0.889 | 0.022 | <u>CFHR4</u>    |
|  | 0.890 | 0.024 | <u>CA3</u>      |
|  | 0.876 | 0.011 | <u>JUNB</u>     |
|  | 0.880 | 0.015 | <u>BTN3A3</u>   |
|  | 0.879 | 0.016 | <u>KCTD9</u>    |
|  | 0.886 | 0.022 | <u>ZFY</u>      |
|  | 0.894 | 0.032 | <u>HCRT</u>     |
|  | 0.896 | 0.035 | <u>NCR3</u>     |
|  | 0.896 | 0.035 | <u>EMILIN2</u>  |
|  | 0.880 | 0.019 | <u>SLC45A2</u>  |
|  | 0.878 | 0.018 | <u>WDHD1</u>    |
|  | 0.884 | 0.024 | <u>HGD</u>      |
|  | 0.869 | 0.009 | <u>SMAP1</u>    |
|  | 0.877 | 0.019 | <u>CCDC134</u>  |
|  | 0.898 | 0.040 | <u>STXBP5L</u>  |
|  | 0.883 | 0.025 | <u>HOXD3</u>    |
|  | 0.888 | 0.031 | <u>CCDC30</u>   |
|  | 0.879 | 0.021 | <u>RAX</u>      |
|  | 0.879 | 0.024 | <u>PLA2G10</u>  |
|  | 0.885 | 0.030 | <u>PSORS1C2</u> |
|  | 0.881 | 0.027 | <u>KLF8</u>     |
|  | 0.869 | 0.016 | <u>PGLYRP1</u>  |

|  |       |       |                     |
|--|-------|-------|---------------------|
|  | 0.873 | 0.019 | <u>LEP</u>          |
|  | 0.873 | 0.019 | <u>VSTM4</u>        |
|  | 0.882 | 0.029 | <u>ZNF536</u>       |
|  | 0.870 | 0.018 | <u>DKFZP547G183</u> |
|  | 0.874 | 0.022 | <u>CTBP2</u>        |
|  | 0.873 | 0.022 | <u>ALDH3B2</u>      |
|  | 0.866 | 0.015 | <u>HOPX</u>         |
|  | 0.869 | 0.019 | <u>SEC22A</u>       |
|  | 0.860 | 0.010 | <u>RTN4</u>         |
|  | 0.876 | 0.026 | <u>MAPK10</u>       |
|  | 0.869 | 0.020 | <u>RAD23B</u>       |
|  | 0.879 | 0.030 | <u>SPACA1</u>       |
|  | 0.863 | 0.014 | <u>FAM179B</u>      |
|  | 0.883 | 0.034 | <u>GUCY1B2</u>      |
|  | 0.874 | 0.025 | <u>SLC25A16</u>     |
|  | 0.864 | 0.015 | <u>IL12B</u>        |
|  | 0.870 | 0.022 | <u>MED6</u>         |
|  | 0.886 | 0.039 | <u>FAM198B</u>      |
|  | 0.860 | 0.014 | <u>TOLLIP</u>       |
|  | 0.868 | 0.022 | <u>RAB4A</u>        |
|  | 0.874 | 0.028 | <u>ARFIP1</u>       |
|  | 0.866 | 0.019 | <u>ITPR2</u>        |
|  | 0.865 | 0.019 | <u>SPTLC3</u>       |
|  | 0.872 | 0.026 | <u>ADARB2</u>       |
|  | 0.871 | 0.025 | <u>FAM204A</u>      |
|  | 0.871 | 0.026 | <u>FLJ13224</u>     |
|  | 0.866 | 0.021 | <u>KLRC4</u>        |
|  | 0.872 | 0.028 | <u>SYT5</u>         |
|  | 0.853 | 0.010 | <u>LHFPL2</u>       |
|  | 0.879 | 0.036 | <u>TGFB2</u>        |
|  | 0.867 | 0.023 | <u>SLC2A4</u>       |
|  | 0.881 | 0.039 | <u>BAIAP2</u>       |
|  | 0.866 | 0.024 | <u>SEC14L4</u>      |
|  | 0.863 | 0.023 | <u>CNTN5</u>        |
|  | 0.868 | 0.028 | <u>GJA5</u>         |
|  | 0.860 | 0.020 | <u>SLC26A4</u>      |
|  | 0.864 | 0.024 | <u>SH3TC2</u>       |
|  | 0.844 | 0.005 | <u>PGD</u>          |
|  | 0.865 | 0.026 | <u>B3GALT5</u>      |
|  | 0.861 | 0.022 | <u>HIST1H1T</u>     |
|  | 0.867 | 0.028 | <u>TPM3</u>         |
|  | 0.859 | 0.020 | <u>MGAT4A</u>       |
|  | 0.861 | 0.023 | <u>PCDHGA10</u>     |
|  | 0.860 | 0.022 | <u>SLC13A2</u>      |
|  | 0.859 | 0.021 | <u>MKNK1</u>        |
|  | 0.869 | 0.031 | <u>ATP9B</u>        |
|  | 0.858 | 0.022 | <u>PCDHGA3</u>      |

|  |       |       |                  |
|--|-------|-------|------------------|
|  | 0.863 | 0.027 | <u>FOXN2</u>     |
|  | 0.868 | 0.032 | <u>CD1D</u>      |
|  | 0.864 | 0.029 | <u>AGPAT3</u>    |
|  | 0.854 | 0.019 | <u>NID2</u>      |
|  | 0.855 | 0.020 | <u>MAK</u>       |
|  | 0.845 | 0.011 | <u>RIT1</u>      |
|  | 0.862 | 0.029 | <u>ARFGEF2</u>   |
|  | 0.868 | 0.036 | <u>UBE2L6</u>    |
|  | 0.864 | 0.032 | <u>BAIAP2L2</u>  |
|  | 0.861 | 0.030 | <u>PRSS12</u>    |
|  | 0.852 | 0.020 | <u>TCN2</u>      |
|  | 0.855 | 0.024 | <u>PLXNA2</u>    |
|  | 0.859 | 0.029 | <u>TCHH</u>      |
|  | 0.861 | 0.031 | <u>FGD2</u>      |
|  | 0.854 | 0.024 | <u>MDM2</u>      |
|  | 0.856 | 0.027 | <u>ZNF214</u>    |
|  | 0.870 | 0.040 | <u>AVIL</u>      |
|  | 0.853 | 0.025 | <u>PLK4</u>      |
|  | 0.852 | 0.024 | <u>STAT3</u>     |
|  | 0.855 | 0.027 | <u>TPD52L1</u>   |
|  | 0.856 | 0.030 | <u>LOC257152</u> |
|  | 0.855 | 0.028 | <u>PURG</u>      |
|  | 0.871 | 0.048 | <u>BCAT2</u>     |
|  | 0.853 | 0.030 | <u>DAPK1</u>     |
|  | 0.856 | 0.033 | <u>CHD4</u>      |
|  | 0.857 | 0.034 | <u>SCNN1G</u>    |
|  | 0.857 | 0.035 | <u>QPCTL</u>     |
|  | 0.828 | 0.006 | <u>TRIM36</u>    |
|  | 0.840 | 0.020 | <u>MYBL2</u>     |
|  | 0.838 | 0.018 | <u>RASIP1</u>    |
|  | 0.851 | 0.031 | <u>L3MBTL1</u>   |
|  | 0.845 | 0.026 | <u>POU3F3</u>    |
|  | 0.846 | 0.028 | <u>PTK2B</u>     |
|  | 0.839 | 0.021 | <u>TNIP3</u>     |
|  | 0.838 | 0.020 | <u>SPTBN4</u>    |
|  | 0.853 | 0.035 | <u>CEACAM7</u>   |
|  | 0.859 | 0.042 | <u>CELF3</u>     |
|  | 0.838 | 0.022 | <u>SPG21</u>     |
|  | 0.847 | 0.031 | <u>TMC7</u>      |
|  | 0.839 | 0.024 | <u>GYPE</u>      |
|  | 0.838 | 0.023 | <u>C8ORF84</u>   |
|  | 0.839 | 0.024 | <u>HMGA2</u>     |
|  | 0.848 | 0.033 | <u>EBF2</u>      |
|  | 0.840 | 0.026 | <u>CACNA1C</u>   |
|  | 0.837 | 0.025 | <u>ERGIC3</u>    |
|  | 0.841 | 0.031 | <u>PTGER1</u>    |
|  | 0.844 | 0.034 | <u>LIN7C</u>     |

|  |       |       |                  |
|--|-------|-------|------------------|
|  | 0.835 | 0.025 | <u>SCGB1D1</u>   |
|  | 0.851 | 0.042 | <u>TAGLN3</u>    |
|  | 0.843 | 0.034 | <u>HIST1H1A</u>  |
|  | 0.834 | 0.026 | <u>CYP7A1</u>    |
|  | 0.828 | 0.021 | <u>HYMAI</u>     |
|  | 0.821 | 0.014 | <u>BRD4</u>      |
|  | 0.841 | 0.034 | <u>PAR5</u>      |
|  | 0.833 | 0.028 | <u>TMEM212</u>   |
|  | 0.845 | 0.040 | <u>ARHGAP24</u>  |
|  | 0.837 | 0.032 | <u>SOCS7</u>     |
|  | 0.835 | 0.033 | <u>ARID3A</u>    |
|  | 0.820 | 0.019 | <u>KIAA0284</u>  |
|  | 0.836 | 0.034 | <u>EFCAB6</u>    |
|  | 0.842 | 0.041 | <u>DCAF4</u>     |
|  | 0.822 | 0.022 | <u>KCNJ15</u>    |
|  | 0.833 | 0.033 | <u>NKX2-5</u>    |
|  | 0.834 | 0.034 | <u>POU2F3</u>    |
|  | 0.838 | 0.039 | <u>RUFY3</u>     |
|  | 0.836 | 0.037 | <u>GPR85</u>     |
|  | 0.838 | 0.039 | <u>MYO1B</u>     |
|  | 0.830 | 0.032 | <u>FAM20B</u>    |
|  | 0.825 | 0.028 | <u>MCTP2</u>     |
|  | 0.832 | 0.034 | <u>UPF1</u>      |
|  | 0.821 | 0.025 | <u>TRA2A</u>     |
|  | 0.820 | 0.024 | <u>SEPT8</u>     |
|  | 0.828 | 0.032 | <u>OR7E24</u>    |
|  | 0.840 | 0.045 | <u>IRS4</u>      |
|  | 0.817 | 0.022 | <u>PDZD7</u>     |
|  | 0.831 | 0.037 | <u>KLHL28</u>    |
|  | 0.833 | 0.039 | <u>CXCL3</u>     |
|  | 0.821 | 0.029 | <u>ZNF204P</u>   |
|  | 0.824 | 0.032 | <u>SRSF11</u>    |
|  | 0.821 | 0.030 | <u>STAMBPL1</u>  |
|  | 0.819 | 0.028 | <u>LOR</u>       |
|  | 0.820 | 0.030 | <u>ITGA1</u>     |
|  | 0.830 | 0.040 | <u>YWHAE</u>     |
|  | 0.827 | 0.037 | <u>LOC729164</u> |
|  | 0.829 | 0.040 | <u>TCTN1</u>     |
|  | 0.828 | 0.038 | <u>ZNF688</u>    |
|  | 0.798 | 0.009 | <u>DDA1</u>      |
|  | 0.826 | 0.037 | <u>CER1</u>      |
|  | 0.835 | 0.047 | <u>TMCO1</u>     |
|  | 0.833 | 0.045 | <u>PMP22</u>     |
|  | 0.824 | 0.036 | <u>CD40</u>      |
|  | 0.821 | 0.034 | <u>PAX1</u>      |
|  | 0.820 | 0.033 | <u>POU2F2</u>    |
|  | 0.818 | 0.033 | <u>GALNT3</u>    |

|  |       |       |                  |
|--|-------|-------|------------------|
|  | 0.819 | 0.033 | <u>FGFR4</u>     |
|  | 0.808 | 0.023 | <u>USP53</u>     |
|  | 0.828 | 0.043 | <u>NR5A2</u>     |
|  | 0.789 | 0.005 | <u>NCAPG</u>     |
|  | 0.820 | 0.036 | <u>MAPRE3</u>    |
|  | 0.826 | 0.042 | <u>PP13</u>      |
|  | 0.836 | 0.052 | <u>PLA2G2F</u>   |
|  | 0.807 | 0.023 | <u>FSCN2</u>     |
|  | 0.819 | 0.036 | <u>DERA</u>      |
|  | 0.813 | 0.030 | <u>GABRG3</u>    |
|  | 0.810 | 0.028 | <u>LRRC37A4</u>  |
|  | 0.831 | 0.051 | <u>SEZ6L</u>     |
|  | 0.816 | 0.036 | <u>HIST1H2BN</u> |
|  | 0.809 | 0.030 | <u>HCCS</u>      |
|  | 0.805 | 0.026 | <u>OR7E14P</u>   |
|  | 0.812 | 0.033 | <u>ALS2CR8</u>   |
|  | 0.818 | 0.039 | <u>AHCYL2</u>    |
|  | 0.821 | 0.043 | <u>LRRC1</u>     |
|  | 0.808 | 0.031 | <u>VGLL3</u>     |
|  | 0.819 | 0.043 | <u>VN1R1</u>     |
|  | 0.827 | 0.052 | <u>PKP1</u>      |
|  | 0.819 | 0.044 | <u>KRIT1</u>     |
|  | 0.799 | 0.025 | <u>GNRH1</u>     |
|  | 0.808 | 0.035 | <u>LBX1</u>      |
|  | 0.817 | 0.044 | <u>TECTA</u>     |
|  | 0.806 | 0.033 | <u>CLASP2</u>    |
|  | 0.800 | 0.028 | <u>BRCA2</u>     |
|  | 0.813 | 0.041 | <u>CRB1</u>      |
|  | 0.819 | 0.048 | <u>RAB28</u>     |
|  | 0.802 | 0.031 | <u>BBS7</u>      |
|  | 0.800 | 0.029 | <u>MLANA</u>     |
|  | 0.790 | 0.020 | <u>SEPX1</u>     |
|  | 0.834 | 0.065 | <u>NR0B1</u>     |
|  | 0.816 | 0.047 | <u>SLC6A16</u>   |
|  | 0.803 | 0.034 | <u>ZBTB6</u>     |
|  | 0.813 | 0.045 | <u>HNRNPD</u>    |
|  | 0.807 | 0.039 | <u>FOXD2</u>     |
|  | 0.802 | 0.035 | <u>DOPEY1</u>    |
|  | 0.810 | 0.043 | <u>ARSD</u>      |
|  | 0.795 | 0.028 | <u>LIMK2</u>     |
|  | 0.804 | 0.037 | <u>HOXB8</u>     |
|  | 0.809 | 0.044 | <u>KCNC1</u>     |
|  | 0.807 | 0.042 | <u>EPHB1</u>     |
|  | 0.805 | 0.040 | <u>ICA1</u>      |
|  | 0.812 | 0.048 | <u>MAGEC3</u>    |
|  | 0.799 | 0.035 | <u>C11ORF63</u>  |
|  | 0.800 | 0.037 | <u>ELP4</u>      |

|  |       |       |                |
|--|-------|-------|----------------|
|  | 0.820 | 0.057 | <u>ZBED4</u>   |
|  | 0.802 | 0.039 | <u>RFC1</u>    |
|  | 0.798 | 0.036 | <u>FHL2</u>    |
|  | 0.816 | 0.054 | <u>TRIM15</u>  |
|  | 0.798 | 0.036 | <u>CEP97</u>   |
|  | 0.802 | 0.040 | <u>SEMA3F</u>  |
|  | 0.805 | 0.044 | <u>RAB14</u>   |
|  | 0.817 | 0.056 | <u>SLC4A7</u>  |
|  | 0.816 | 0.055 | C1ORF68        |
|  | 0.789 | 0.029 | EFCAB1         |
|  | 0.808 | 0.047 | ZFP2           |
|  | 0.804 | 0.045 | <u>MINK1</u>   |
|  | 0.795 | 0.037 | RPS2P45        |
|  | 0.820 | 0.062 | <u>TPA</u>     |
|  | 0.792 | 0.036 | <u>EMX2</u>    |
|  | 0.796 | 0.039 | TRDN           |
|  | 0.800 | 0.044 | <u>PYHIN1</u>  |
|  | 0.789 | 0.033 | <u>GPR77</u>   |
|  | 0.795 | 0.039 | <u>LCMT2</u>   |
|  | 0.802 | 0.047 | <u>PVR</u>     |
|  | 0.790 | 0.034 | <u>LNPEP</u>   |
|  | 0.790 | 0.035 | <u>SNX13</u>   |
|  | 0.801 | 0.047 | PBOV1          |
|  | 0.786 | 0.033 | <u>NFATC4</u>  |
|  | 0.795 | 0.042 | <u>AFF4</u>    |
|  | 0.810 | 0.057 | <u>DEDD</u>    |
|  | 0.820 | 0.068 | <u>FSCN3</u>   |
|  | 0.798 | 0.046 | <u>PLIN2</u>   |
|  | 0.790 | 0.039 | <u>EVC</u>     |
|  | 0.795 | 0.044 | <u>SIK2</u>    |
|  | 0.782 | 0.031 | <u>SAGE1</u>   |
|  | 0.758 | 0.007 | <u>ORMDL2</u>  |
|  | 0.788 | 0.037 | <u>GPR97</u>   |
|  | 0.807 | 0.056 | <u>FAM115A</u> |
|  | 0.786 | 0.038 | <u>BMP4</u>    |
|  | 0.797 | 0.049 | SOX14          |
|  | 0.793 | 0.045 | <u>ATOH1</u>   |
|  | 0.804 | 0.057 | WIZ            |
|  | 0.791 | 0.044 | <u>COL6A1</u>  |
|  | 0.793 | 0.046 | <u>SPICE1</u>  |
|  | 0.800 | 0.054 | <u>NR4A1</u>   |
|  | 0.802 | 0.057 | <u>PDPR</u>    |
|  | 0.802 | 0.058 | <u>GOLGA6A</u> |
|  | 0.791 | 0.048 | <u>CEACAM1</u> |
|  | 0.789 | 0.046 | <u>NOX3</u>    |
|  | 0.792 | 0.051 | <u>TGM5</u>    |
|  | 0.781 | 0.040 | <u>AGBL2</u>   |

|  |       |       |                 |
|--|-------|-------|-----------------|
|  | 0.782 | 0.043 | GRIN2D          |
|  | 0.807 | 0.068 | <u>AHI1</u>     |
|  | 0.785 | 0.046 | PCDHB1          |
|  | 0.772 | 0.033 | <u>SMG1</u>     |
|  | 0.782 | 0.045 | <u>NCBP1</u>    |
|  | 0.792 | 0.055 | <u>NONO</u>     |
|  | 0.774 | 0.037 | <u>CCDC70</u>   |
|  | 0.769 | 0.033 | <u>TGFB3</u>    |
|  | 0.783 | 0.047 | <u>TSHR</u>     |
|  | 0.793 | 0.060 | <u>MT4</u>      |
|  | 0.784 | 0.051 | <u>ADRA1B</u>   |
|  | 0.786 | 0.053 | <u>CD80</u>     |
|  | 0.773 | 0.041 | <u>TTLL3</u>    |
|  | 0.776 | 0.044 | <u>PTPRN2</u>   |
|  | 0.781 | 0.049 | IGHV5-78        |
|  | 0.800 | 0.069 | <u>IFNA17</u>   |
|  | 0.772 | 0.041 | <u>IMPAD1</u>   |
|  | 0.770 | 0.039 | <u>SMC4</u>     |
|  | 0.771 | 0.041 | <u>COG5</u>     |
|  | 0.788 | 0.059 | SEC14L5         |
|  | 0.777 | 0.048 | UBQLN3          |
|  | 0.780 | 0.052 | <u>TMEM5</u>    |
|  | 0.777 | 0.050 | <u>AATK</u>     |
|  | 0.802 | 0.075 | <u>CRCP</u>     |
|  | 0.766 | 0.039 | <u>FER</u>      |
|  | 0.784 | 0.057 | <u>HNRNPUL2</u> |
|  | 0.775 | 0.049 | <u>DENND4A</u>  |
|  | 0.773 | 0.047 | <u>SETD2</u>    |
|  | 0.765 | 0.041 | <u>TMX4</u>     |
|  | 0.791 | 0.068 | ATXN8OS         |
|  | 0.779 | 0.057 | <u>CACNB4</u>   |
|  | 0.759 | 0.038 | <u>ZBTB7C</u>   |
|  | 0.774 | 0.054 | <u>MYO5A</u>    |
|  | 0.782 | 0.063 | <u>PRKDC</u>    |
|  | 0.772 | 0.053 | <u>POLR3G</u>   |
|  | 0.756 | 0.037 | <u>EIF3M</u>    |
|  | 0.775 | 0.058 | <u>GGA1</u>     |
|  | 0.768 | 0.051 | <u>DEC1</u>     |
|  | 0.769 | 0.053 | <u>SHH</u>      |
|  | 0.757 | 0.042 | <u>SYK</u>      |
|  | 0.763 | 0.047 | <u>PKD2L2</u>   |
|  | 0.774 | 0.059 | <u>VPREB1</u>   |
|  | 0.754 | 0.039 | <u>CCDC87</u>   |
|  | 0.763 | 0.049 | <u>C16ORF70</u> |
|  | 0.772 | 0.058 | <u>CADPS</u>    |
|  | 0.781 | 0.067 | <u>MRE11A</u>   |
|  | 0.762 | 0.048 | <u>HNRPDL</u>   |

|  |       |       |                   |
|--|-------|-------|-------------------|
|  | 0.775 | 0.061 | <u>CAMKMT</u>     |
|  | 0.759 | 0.046 | <u>PDE3A</u>      |
|  | 0.773 | 0.060 | <u>KRTAP1-3</u>   |
|  | 0.778 | 0.065 | <u>TP53I11</u>    |
|  | 0.759 | 0.047 | <u>DCT</u>        |
|  | 0.771 | 0.060 | <u>SCN7A</u>      |
|  | 0.765 | 0.053 | <u>KIF2A</u>      |
|  | 0.780 | 0.069 | <u>COL4A6</u>     |
|  | 0.747 | 0.036 | <u>COL3A1</u>     |
|  | 0.758 | 0.047 | <u>EXPH5</u>      |
|  | 0.778 | 0.067 | <u>TUBGCP5</u>    |
|  | 0.719 | 0.008 | <u>HSD17B11</u>   |
|  | 0.766 | 0.056 | <u>CLMN</u>       |
|  | 0.758 | 0.048 | <u>TRADD</u>      |
|  | 0.757 | 0.047 | <u>VPS72</u>      |
|  | 0.761 | 0.052 | <u>TCF3</u>       |
|  | 0.764 | 0.055 | <u>LMAN1</u>      |
|  | 0.775 | 0.065 | <u>TMEM144</u>    |
|  | 0.757 | 0.047 | <u>NOV</u>        |
|  | 0.749 | 0.040 | <u>DDX17</u>      |
|  | 0.770 | 0.061 | <u>SERPINB9</u>   |
|  | 0.760 | 0.052 | <u>PDCD6</u>      |
|  | 0.746 | 0.039 | <u>ICMT</u>       |
|  | 0.756 | 0.050 | <u>EFNA2</u>      |
|  | 0.765 | 0.061 | <u>EP300</u>      |
|  | 0.750 | 0.047 | <u>RCHY1</u>      |
|  | 0.771 | 0.069 | <u>EYA3</u>       |
|  | 0.765 | 0.063 | <u>VSNL1</u>      |
|  | 0.744 | 0.043 | <u>SLC22A18AS</u> |
|  | 0.751 | 0.050 | <u>XCR1</u>       |
|  | 0.748 | 0.048 | <u>PDK3</u>       |
|  | 0.759 | 0.060 | <u>HRH3</u>       |
|  | 0.768 | 0.071 | <u>CLEC5A</u>     |
|  | 0.752 | 0.055 | <u>ARMC9</u>      |
|  | 0.758 | 0.061 | <u>H2AFX</u>      |
|  | 0.743 | 0.047 | <u>MPPED2</u>     |
|  | 0.763 | 0.067 | <u>TFAP2C</u>     |
|  | 0.751 | 0.055 | <u>ATP12A</u>     |
|  | 0.744 | 0.052 | <u>ZNF480</u>     |
|  | 0.732 | 0.041 | <u>HIST1H2BK</u>  |
|  | 0.744 | 0.054 | <u>MEOX2</u>      |
|  | 0.748 | 0.058 | <u>ZNF695</u>     |
|  | 0.735 | 0.045 | <u>RHOA</u>       |
|  | 0.740 | 0.050 | <u>TRIM33</u>     |
|  | 0.749 | 0.060 | <u>PRPF31</u>     |
|  | 0.745 | 0.056 | <u>TAF4</u>       |
|  | 0.753 | 0.065 | <u>PER2</u>       |

|  |       |       |                 |
|--|-------|-------|-----------------|
|  | 0.747 | 0.059 | <u>PHC3</u>     |
|  | 0.745 | 0.058 | <u>SAP30</u>    |
|  | 0.743 | 0.057 | <u>PPEF2</u>    |
|  | 0.746 | 0.060 | <u>PRX</u>      |
|  | 0.748 | 0.064 | <u>HCRTR1</u>   |
|  | 0.748 | 0.064 | <u>ALDH3A2</u>  |
|  | 0.745 | 0.062 | <u>GFRA2</u>    |
|  | 0.748 | 0.066 | DKFZP686O1327   |
|  | 0.754 | 0.072 | <u>RP2</u>      |
|  | 0.746 | 0.065 | <u>UBAP2L</u>   |
|  | 0.744 | 0.064 | <u>CEP152</u>   |
|  | 0.742 | 0.062 | CC2D1A          |
|  | 0.735 | 0.055 | <u>FUT3</u>     |
|  | 0.737 | 0.058 | <u>DENND1C</u>  |
|  | 0.734 | 0.055 | POLR2J4         |
|  | 0.732 | 0.054 | <u>CCNE2</u>    |
|  | 0.760 | 0.082 | <u>CCBP2</u>    |
|  | 0.741 | 0.065 | <u>HSD3B1</u>   |
|  | 0.735 | 0.058 | <u>PBX2</u>     |
|  | 0.729 | 0.053 | <u>KLHL11</u>   |
|  | 0.753 | 0.077 | <u>TAPT1</u>    |
|  | 0.752 | 0.077 | <u>PCDHGC3</u>  |
|  | 0.730 | 0.055 | <u>TRANK1</u>   |
|  | 0.752 | 0.079 | <u>TMEM206</u>  |
|  | 0.738 | 0.065 | <u>HTR1D</u>    |
|  | 0.743 | 0.072 | <u>HCN2</u>     |
|  | 0.734 | 0.063 | <u>C15ORF39</u> |
|  | 0.732 | 0.061 | FOXN1           |
|  | 0.728 | 0.057 | <u>WDR59</u>    |
|  | 0.749 | 0.079 | <u>MICAL2</u>   |
|  | 0.716 | 0.045 | <u>PLP2</u>     |
|  | 0.742 | 0.072 | <u>TSNAXIP1</u> |
|  | 0.738 | 0.067 | <u>MAF</u>      |
|  | 0.727 | 0.058 | <u>IREB2</u>    |
|  | 0.727 | 0.058 | <u>SLC15A2</u>  |
|  | 0.714 | 0.046 | <u>LRP4</u>     |
|  | 0.718 | 0.050 | <u>PRKX</u>     |
|  | 0.712 | 0.045 | <u>SIDT1</u>    |
|  | 0.730 | 0.063 | <u>TAOK2</u>    |
|  | 0.740 | 0.075 | <u>GABRA2</u>   |
|  | 0.733 | 0.068 | <u>HS3ST3B1</u> |
|  | 0.725 | 0.060 | <u>HLA-DRB6</u> |
|  | 0.723 | 0.059 | <u>E2F1</u>     |
|  | 0.736 | 0.072 | <u>POU3F4</u>   |
|  | 0.732 | 0.069 | <u>FGF23</u>    |
|  | 0.734 | 0.071 | <u>ALK</u>      |
|  | 0.736 | 0.075 | <u>LARP4B</u>   |

|  |       |       |                 |
|--|-------|-------|-----------------|
|  | 0.730 | 0.070 | <u>PTPRC</u>    |
|  | 0.685 | 0.025 | <u>UGDH</u>     |
|  | 0.731 | 0.073 | <u>SDHD</u>     |
|  | 0.719 | 0.061 | <u>SENP6</u>    |
|  | 0.738 | 0.080 | <u>EXTL3</u>    |
|  | 0.712 | 0.055 | <u>ETV1</u>     |
|  | 0.732 | 0.076 | <u>FSHR</u>     |
|  | 0.734 | 0.078 | <u>SPN</u>      |
|  | 0.726 | 0.074 | <u>AQP4</u>     |
|  | 0.727 | 0.075 | <u>RBMS2</u>    |
|  | 0.721 | 0.071 | <u>SMCP</u>     |
|  | 0.713 | 0.066 | <u>FUT2</u>     |
|  | 0.734 | 0.088 | <u>NUP205</u>   |
|  | 0.709 | 0.063 | <u>MYB</u>      |
|  | 0.711 | 0.067 | <u>WWTR1</u>    |
|  | 0.712 | 0.069 | <u>ADAMTSL4</u> |
|  | 0.709 | 0.067 | <u>DDR1</u>     |
|  | 0.685 | 0.045 | <u>PLA2G15</u>  |
|  | 0.699 | 0.061 | <u>PDS5A</u>    |
|  | 0.714 | 0.077 | <u>KHK</u>      |
|  | 0.722 | 0.085 | <u>LEF1</u>     |
|  | 0.658 | 0.021 | <u>DERL2</u>    |
|  | 0.661 | 0.025 | <u>TCFL5</u>    |
|  | 0.707 | 0.071 | <u>TOM1</u>     |
|  | 0.658 | 0.022 | <u>HOMER2</u>   |
|  | 0.714 | 0.078 | LOC51145        |
|  | 0.723 | 0.088 | <u>MCF2</u>     |
|  | 0.722 | 0.088 | <u>HRK</u>      |
|  | 0.704 | 0.071 | <u>NXT2</u>     |
|  | 0.717 | 0.085 | <u>HBS1L</u>    |
|  | 0.704 | 0.072 | <u>OLAH</u>     |
|  | 0.703 | 0.073 | <u>NPY6R</u>    |
|  | 0.722 | 0.091 | <u>PGCP</u>     |
|  | 0.712 | 0.082 | <u>GRIN2C</u>   |
|  | 0.708 | 0.080 | <u>NOTCH3</u>   |
|  | 0.705 | 0.079 | <u>PDK4</u>     |
|  | 0.680 | 0.055 | <u>MBOAT2</u>   |
|  | 0.706 | 0.081 | <u>HIPK3</u>    |
|  | 0.705 | 0.080 | <u>ARHGAP6</u>  |
|  | 0.700 | 0.076 | <u>STRN</u>     |
|  | 0.709 | 0.085 | <u>HOXD1</u>    |
|  | 0.704 | 0.081 | <u>FOXD3</u>    |
|  | 0.700 | 0.077 | TSSK1B          |
|  | 0.707 | 0.084 | ZNF3            |
|  | 0.707 | 0.085 | ZNF280B         |
|  | 0.698 | 0.078 | <u>HLF</u>      |
|  | 0.696 | 0.076 | <u>BCL2</u>     |

|  |       |       |                  |
|--|-------|-------|------------------|
|  | 0.694 | 0.076 | <u>CYLC2</u>     |
|  | 0.697 | 0.079 | <u>ATXN3L</u>    |
|  | 0.692 | 0.077 | <u>DHRS7</u>     |
|  | 0.687 | 0.073 | <u>FOX E1</u>    |
|  | 0.703 | 0.090 | <u>RASAL2</u>    |
|  | 0.697 | 0.086 | <u>CNGB1</u>     |
|  | 0.676 | 0.066 | <u>SMEK1</u>     |
|  | 0.686 | 0.080 | <u>TOP3A</u>     |
|  | 0.716 | 0.110 | <u>GRIA1</u>     |
|  | 0.680 | 0.079 | <u>EP400</u>     |
|  | 0.694 | 0.093 | <u>EHD2</u>      |
|  | 0.669 | 0.069 | <u>SHC1</u>      |
|  | 0.649 | 0.048 | <u>GABARAPL1</u> |
|  | 0.692 | 0.092 | <u>FKBP1A</u>    |
|  | 0.690 | 0.092 | <u>GSPT1</u>     |
|  | 0.645 | 0.052 | <u>S100A4</u>    |
|  | 0.686 | 0.093 | <u>TIMM8A</u>    |
|  | 0.693 | 0.100 | <u>RPL10</u>     |
|  | 0.644 | 0.051 | <u>CISD1</u>     |
|  | 0.697 | 0.104 | <u>LRRC37BP1</u> |
|  | 0.694 | 0.102 | <u>TLR6</u>      |
|  | 0.673 | 0.082 | <u>SIGLEC1</u>   |
|  | 0.677 | 0.087 | <u>CCNT2</u>     |
|  | 0.690 | 0.102 | <u>PCIF1</u>     |
|  | 0.669 | 0.081 | <u>POM121L9P</u> |
|  | 0.633 | 0.046 | <u>TF</u>        |
|  | 0.641 | 0.055 | <u>CDH3</u>      |
|  | 0.673 | 0.087 | <u>AKAP9</u>     |
|  | 0.678 | 0.094 | <u>LILRA5</u>    |
|  | 0.678 | 0.094 | <u>SP2</u>       |
|  | 0.673 | 0.092 | <u>ERC2</u>      |
|  | 0.687 | 0.107 | <u>ELAC2</u>     |
|  | 0.668 | 0.090 | <u>AMACR</u>     |
|  | 0.644 | 0.066 | <u>IKBKAP</u>    |
|  | 0.676 | 0.099 | <u>RYR2</u>      |
|  | 0.683 | 0.106 | <u>SMAD4</u>     |
|  | 0.664 | 0.089 | <u>LRRC23</u>    |
|  | 0.660 | 0.086 | <u>CUL4B</u>     |
|  | 0.667 | 0.095 | <u>KIF1A</u>     |
|  | 0.651 | 0.079 | <u>DCUN1D4</u>   |
|  | 0.665 | 0.093 | <u>TACSTD2</u>   |
|  | 0.664 | 0.094 | <u>TUB</u>       |
|  | 0.670 | 0.102 | <u>HPCAL4</u>    |
|  | 0.654 | 0.088 | <u>NCAPH2</u>    |
|  | 0.654 | 0.088 | <u>NUDT7</u>     |
|  | 0.660 | 0.095 | <u>COL8A1</u>    |
|  | 0.623 | 0.059 | <u>PSMF1</u>     |

|  |       |       |                  |
|--|-------|-------|------------------|
|  | 0.664 | 0.099 | <u>PDE11A</u>    |
|  | 0.656 | 0.092 | <u>CFTR</u>      |
|  | 0.658 | 0.096 | <u>ELOVL5</u>    |
|  | 0.617 | 0.055 | <u>CCNA1</u>     |
|  | 0.670 | 0.109 | <u>PCSK2</u>     |
|  | 0.650 | 0.089 | TEX28            |
|  | 0.653 | 0.092 | <u>ATF7IP</u>    |
|  | 0.668 | 0.109 | <u>TRPC6</u>     |
|  | 0.660 | 0.101 | <u>ULK4</u>      |
|  | 0.671 | 0.113 | <u>FLT1</u>      |
|  | 0.645 | 0.088 | <u>CDC42EP4</u>  |
|  | 0.665 | 0.108 | <u>RFPL3-AS1</u> |
|  | 0.651 | 0.096 | <u>KCNH6</u>     |
|  | 0.651 | 0.097 | <u>SYT1</u>      |
|  | 0.656 | 0.102 | <u>CD36</u>      |
|  | 0.662 | 0.109 | <u>GUCA1B</u>    |
|  | 0.655 | 0.103 | LOC220077        |
|  | 0.648 | 0.096 | <u>RPL13</u>     |
|  | 0.641 | 0.089 | <u>DPF3</u>      |
|  | 0.604 | 0.053 | <u>NOLC1</u>     |
|  | 0.656 | 0.106 | MUC8             |
|  | 0.651 | 0.103 | <u>FOXA2</u>     |
|  | 0.649 | 0.101 | ZNF442           |
|  | 0.614 | 0.066 | <u>GAA</u>       |
|  | 0.647 | 0.100 | <u>C16ORF71</u>  |
|  | 0.632 | 0.088 | FLJ10038         |
|  | 0.651 | 0.108 | <u>ZBTB7A</u>    |
|  | 0.647 | 0.108 | <u>ABI2</u>      |
|  | 0.630 | 0.092 | <u>LCE2B</u>     |
|  | 0.659 | 0.120 | <u>AHNAK</u>     |
|  | 0.646 | 0.109 | <u>BCL2L11</u>   |
|  | 0.651 | 0.115 | <u>SLCO1A2</u>   |
|  | 0.634 | 0.101 | <u>PDLIM4</u>    |
|  | 0.630 | 0.097 | <u>SERPINB7</u>  |
|  | 0.628 | 0.095 | <u>EIF5B</u>     |
|  | 0.651 | 0.118 | <u>C6ORF10</u>   |
|  | 0.582 | 0.049 | <u>LOXL1</u>     |
|  | 0.612 | 0.081 | <u>COG4</u>      |
|  | 0.643 | 0.113 | GPR52            |
|  | 0.620 | 0.092 | <u>CLNS1A</u>    |
|  | 0.624 | 0.097 | <u>PLLP</u>      |
|  | 0.625 | 0.099 | <u>RUNDC3A</u>   |
|  | 0.636 | 0.111 | <u>IDS</u>       |
|  | 0.632 | 0.107 | EPAG             |
|  | 0.628 | 0.105 | CTIF             |
|  | 0.636 | 0.114 | <u>TRO</u>       |
|  | 0.639 | 0.118 | <u>PDE4C</u>     |

|  |       |       |                  |
|--|-------|-------|------------------|
|  | 0.627 | 0.107 | <u>SRGAP3</u>    |
|  | 0.639 | 0.119 | <u>ACSBG1</u>    |
|  | 0.640 | 0.121 | <u>FPR2</u>      |
|  | 0.621 | 0.103 | <u>GALC</u>      |
|  | 0.631 | 0.113 | <u>SOCS1</u>     |
|  | 0.636 | 0.122 | <u>RS1</u>       |
|  | 0.620 | 0.107 | <u>PPP4R4</u>    |
|  | 0.628 | 0.116 | <u>P2RX1</u>     |
|  | 0.627 | 0.115 | <u>ARHGEF4</u>   |
|  | 0.634 | 0.123 | <u>RPS6KA6</u>   |
|  | 0.576 | 0.069 | <u>KLHL9</u>     |
|  | 0.618 | 0.111 | <u>PAPOLA</u>    |
|  | 0.620 | 0.114 | <u>MYL4</u>      |
|  | 0.625 | 0.121 | <u>NUP88</u>     |
|  | 0.607 | 0.104 | <u>NCOA3</u>     |
|  | 0.604 | 0.102 | <u>SLC26A2</u>   |
|  | 0.608 | 0.107 | <u>FOXG1</u>     |
|  | 0.616 | 0.116 | <u>PRKAR2A</u>   |
|  | 0.565 | 0.065 | <u>NME1</u>      |
|  | 0.610 | 0.112 | <u>NCLN</u>      |
|  | 0.611 | 0.114 | <u>XIAP</u>      |
|  | 0.608 | 0.111 | <u>FPR1</u>      |
|  | 0.620 | 0.125 | <u>ACTR2</u>     |
|  | 0.611 | 0.116 | <u>VPS13C</u>    |
|  | 0.606 | 0.112 | <u>CDK17</u>     |
|  | 0.589 | 0.100 | <u>MPZ</u>       |
|  | 0.545 | 0.058 | <u>WDR7</u>      |
|  | 0.614 | 0.128 | <u>TAS2R4</u>    |
|  | 0.608 | 0.122 | <u>AURKC</u>     |
|  | 0.581 | 0.099 | <u>ATP6V1D</u>   |
|  | 0.600 | 0.119 | <u>GPR37</u>     |
|  | 0.601 | 0.121 | <u>PQLC3</u>     |
|  | 0.610 | 0.130 | <u>P2RY1</u>     |
|  | 0.604 | 0.125 | <u>ANK2</u>      |
|  | 0.588 | 0.109 | <u>CD163</u>     |
|  | 0.607 | 0.128 | <u>TRIM3</u>     |
|  | 0.600 | 0.125 | <u>WISP1</u>     |
|  | 0.604 | 0.129 | <u>KIAA1751</u>  |
|  | 0.595 | 0.123 | <u>OR52A1</u>    |
|  | 0.583 | 0.111 | <u>RSF1</u>      |
|  | 0.585 | 0.114 | <u>EPS15L1</u>   |
|  | 0.591 | 0.123 | <u>CCL25</u>     |
|  | 0.586 | 0.120 | <u>KIDINS220</u> |
|  | 0.582 | 0.117 | <u>MEG3</u>      |
|  | 0.587 | 0.125 | <u>CTNS</u>      |
|  | 0.584 | 0.122 | <u>BRF1</u>      |
|  | 0.585 | 0.125 | <u>JAK3</u>      |

|  |       |       |                 |
|--|-------|-------|-----------------|
|  | 0.573 | 0.120 | <u>TCP10L</u>   |
|  | 0.581 | 0.128 | <u>TDRKH</u>    |
|  | 0.576 | 0.127 | <u>IGHA1</u>    |
|  | 0.564 | 0.116 | <u>RNGTT</u>    |
|  | 0.580 | 0.132 | <u>VENTXP1</u>  |
|  | 0.579 | 0.131 | <u>GABRB2</u>   |
|  | 0.582 | 0.135 | <u>SCN11A</u>   |
|  | 0.567 | 0.120 | <u>TRGV5</u>    |
|  | 0.583 | 0.139 | <u>CNTNAP2</u>  |
|  | 0.578 | 0.134 | <u>NIPBL</u>    |
|  | 0.570 | 0.128 | <u>NRXN3</u>    |
|  | 0.568 | 0.128 | <u>PICALM</u>   |
|  | 0.581 | 0.141 | <u>LIMK1</u>    |
|  | 0.534 | 0.097 | <u>NFATC3</u>   |
|  | 0.563 | 0.126 | <u>CHEK1</u>    |
|  | 0.548 | 0.111 | <u>KIAA1324</u> |
|  | 0.568 | 0.132 | <u>SOCS3</u>    |
|  | 0.576 | 0.141 | <u>PIN4</u>     |
|  | 0.575 | 0.140 | <u>GAB1</u>     |
|  | 0.562 | 0.129 | <u>PPARA</u>    |
|  | 0.566 | 0.133 | <u>LYST</u>     |
|  | 0.570 | 0.138 | <u>REPIN1</u>   |
|  | 0.568 | 0.140 | <u>HUS1</u>     |
|  | 0.562 | 0.135 | <u>DCHS2</u>    |
|  | 0.565 | 0.138 | <u>VIPR2</u>    |
|  | 0.565 | 0.139 | <u>GRIN1</u>    |
|  | 0.565 | 0.140 | <u>MED25</u>    |
|  | 0.544 | 0.120 | <u>GSTM2</u>    |
|  | 0.544 | 0.122 | <u>SAFB</u>     |
|  | 0.562 | 0.143 | <u>DRD3</u>     |
|  | 0.542 | 0.128 | <u>PIP5K1B</u>  |
|  | 0.559 | 0.145 | <u>ACSL6</u>    |
|  | 0.561 | 0.147 | <u>SYDE1</u>    |
|  | 0.568 | 0.155 | <u>FKBP15</u>   |
|  | 0.565 | 0.152 | <u>EZR</u>      |
|  | 0.550 | 0.137 | <u>GJB3</u>     |
|  | 0.565 | 0.152 | <u>C11ORF9</u>  |
|  | 0.554 | 0.142 | <u>KANK1</u>    |
|  | 0.551 | 0.139 | <u>DTX3</u>     |
|  | 0.548 | 0.137 | <u>MVK</u>      |
|  | 0.548 | 0.138 | <u>ASB4</u>     |
|  | 0.540 | 0.133 | <u>ZMYND8</u>   |
|  | 0.544 | 0.139 | <u>CD8B</u>     |
|  | 0.549 | 0.145 | <u>KLRD1</u>    |
|  | 0.543 | 0.139 | <u>SIKE1</u>    |
|  | 0.542 | 0.139 | <u>PCSK6</u>    |
|  | 0.535 | 0.133 | <u>ANKRD12</u>  |

|  |       |       |                 |
|--|-------|-------|-----------------|
|  | 0.548 | 0.148 | <u>ESR2</u>     |
|  | 0.533 | 0.141 | <u>MUSK</u>     |
|  | 0.535 | 0.143 | <u>ZBTB44</u>   |
|  | 0.536 | 0.146 | <u>SMARCA1</u>  |
|  | 0.535 | 0.148 | <u>NEU3</u>     |
|  | 0.531 | 0.145 | <u>COBLL1</u>   |
|  | 0.526 | 0.140 | <u>CASR</u>     |
|  | 0.525 | 0.142 | <u>SYNJ2</u>    |
|  | 0.530 | 0.148 | <u>ERCC4</u>    |
|  | 0.526 | 0.144 | <u>ZIM2</u>     |
|  | 0.528 | 0.147 | <u>P2RX2</u>    |
|  | 0.524 | 0.142 | <u>KCNMA1</u>   |
|  | 0.529 | 0.148 | <u>CEACAM3</u>  |
|  | 0.526 | 0.145 | <u>GRM1</u>     |
|  | 0.517 | 0.137 | <u>HEBP2</u>    |
|  | 0.527 | 0.148 | <u>RUNX1T1</u>  |
|  | 0.516 | 0.139 | <u>CYP2D6</u>   |
|  | 0.522 | 0.146 | <u>IOCK</u>     |
|  | 0.507 | 0.131 | <u>MBNL1</u>    |
|  | 0.511 | 0.135 | <u>EDDM3A</u>   |
|  | 0.535 | 0.160 | <u>NRXN1</u>    |
|  | 0.533 | 0.157 | <u>HSPA12A</u>  |
|  | 0.531 | 0.157 | <u>DCTN1</u>    |
|  | 0.519 | 0.146 | <u>AKAP6</u>    |
|  | 0.512 | 0.141 | <u>BRP44</u>    |
|  | 0.519 | 0.152 | <u>CHRNE</u>    |
|  | 0.526 | 0.160 | <u>HNMT</u>     |
|  | 0.549 | 0.182 | <u>NPTN</u>     |
|  | 0.519 | 0.152 | <u>GLS</u>      |
|  | 0.523 | 0.158 | <u>SNRK</u>     |
|  | 0.514 | 0.151 | <u>CD22</u>     |
|  | 0.508 | 0.145 | <u>RBMXL2</u>   |
|  | 0.514 | 0.155 | <u>ADCY9</u>    |
|  | 0.523 | 0.165 | <u>RALGPS1</u>  |
|  | 0.508 | 0.153 | <u>CAMSAP1</u>  |
|  | 0.507 | 0.152 | <u>ELK1</u>     |
|  | 0.514 | 0.160 | <u>SLC25A30</u> |
|  | 0.509 | 0.159 | <u>GRK4</u>     |
|  | 0.506 | 0.156 | <u>ST6GAL1</u>  |
|  | 0.505 | 0.158 | <u>MAU2</u>     |
|  | 0.522 | 0.176 | <u>OBSL1</u>    |
|  | 0.514 | 0.170 | <u>PPFIBP1</u>  |
|  | 0.509 | 0.169 | <u>KCND3</u>    |
|  | 0.509 | 0.170 | <u>NCR1</u>     |
|  | 0.504 | 0.171 | <u>PIGR</u>     |
|  | 0.508 | 0.179 | <u>MLLT4</u>    |

## Combination prediction result

| <u>Name</u>      | <u>Overlap count</u> | <u>Up</u> | <u>Down</u> | <u>Result</u> |
|------------------|----------------------|-----------|-------------|---------------|
| <u>ITM2B</u>     | 4                    | 2         | 2           |               |
| <u>KIAA0753</u>  | 4                    | 2         | 2           |               |
| <u>PDS5B</u>     | 4                    | 4         | 0           |               |
| <u>RIT1</u>      | 4                    | 2         | 2           |               |
| <u>SEC24D</u>    | 4                    | 3         | 1           |               |
| <u>TXNL4B</u>    | 4                    | 2         | 2           |               |
| <u>ACADL</u>     | 3                    | 2         | 1           |               |
| <u>AFF4</u>      | 3                    | 2         | 1           |               |
| <u>AIMP2</u>     | 3                    | 0         | 3           |               |
| <u>ANKRA2</u>    | 3                    | 2         | 1           |               |
| <u>ANXA1</u>     | 3                    | 1         | 2           |               |
| <u>ARFGEF2</u>   | 3                    | 3         | 0           |               |
| <u>ATP6V0E1</u>  | 3                    | 1         | 2           |               |
| <u>BANP</u>      | 3                    | 2         | 1           |               |
| <u>BRD2</u>      | 3                    | 1         | 2           |               |
| <u>C9ORF40</u>   | 3                    | 0         | 3           |               |
| <u>CBR3</u>      | 3                    | 3         | 0           |               |
| <u>CCT6A</u>     | 3                    | 1         | 2           |               |
| <u>CDCP1</u>     | 3                    | 2         | 1           |               |
| <u>CDKN2C</u>    | 3                    | 2         | 1           |               |
| <u>CEACAM6</u>   | 3                    | 1         | 2           |               |
| <u>CHST15</u>    | 3                    | 1         | 2           |               |
| <u>COQ9</u>      | 3                    | 2         | 1           |               |
| <u>COX7A1</u>    | 3                    | 1         | 2           |               |
| <u>CTSB</u>      | 3                    | 2         | 1           |               |
| <u>DCAF17</u>    | 3                    | 2         | 1           |               |
| <u>DHX40</u>     | 3                    | 1         | 2           |               |
| <u>DIAPH2</u>    | 3                    | 1         | 2           |               |
| <u>EEF1B2</u>    | 3                    | 1         | 2           |               |
| <u>EHHADH</u>    | 3                    | 1         | 2           |               |
| <u>FAM179B</u>   | 3                    | 2         | 1           |               |
| <u>FAM188A</u>   | 3                    | 2         | 1           |               |
| <u>FKBP5</u>     | 3                    | 3         | 0           |               |
| <u>FUBP1</u>     | 3                    | 2         | 1           |               |
| <u>GABARAPL1</u> | 3                    | 2         | 1           |               |
| <u>GFAP</u>      | 3                    | 1         | 2           |               |
| <u>GLOD4</u>     | 3                    | 1         | 2           |               |
| <u>HERC1</u>     | 3                    | 1         | 2           |               |
| <u>HIBCH</u>     | 3                    | 1         | 2           |               |
| <u>IKBKAP</u>    | 3                    | 1         | 2           |               |
| <u>IL6ST</u>     | 3                    | 2         | 1           |               |
| <u>KEAP1</u>     | 3                    | 1         | 2           |               |
| <u>LIAS</u>      | 3                    | 1         | 2           |               |
| <u>LINC00342</u> | 3                    | 2         | 1           |               |

|                 |   |   |   |  |
|-----------------|---|---|---|--|
| <u>LRRC8E</u>   | 3 | 2 | 1 |  |
| <u>MAST4</u>    | 3 | 0 | 3 |  |
| <u>MDM2</u>     | 3 | 1 | 2 |  |
| <u>MTSS1</u>    | 3 | 2 | 1 |  |
| <u>NEBL</u>     | 3 | 2 | 1 |  |
| <u>NIPBL</u>    | 3 | 3 | 0 |  |
| <u>NUBP1</u>    | 3 | 1 | 2 |  |
| <u>P2RY1</u>    | 3 | 2 | 1 |  |
| <u>PAPOLA</u>   | 3 | 2 | 1 |  |
| <u>PARP4</u>    | 3 | 0 | 3 |  |
| <u>PDK4</u>     | 3 | 2 | 1 |  |
| <u>PER3</u>     | 3 | 1 | 2 |  |
| <u>PGM3</u>     | 3 | 1 | 2 |  |
| <u>PLK1</u>     | 3 | 1 | 2 |  |
| <u>PLP2</u>     | 3 | 2 | 1 |  |
| <u>PPP1R12A</u> | 3 | 2 | 1 |  |
| <u>PREP</u>     | 3 | 1 | 2 |  |
| <u>PTPN12</u>   | 3 | 2 | 1 |  |
| <u>RAB14</u>    | 3 | 2 | 1 |  |
| <u>RANGAP1</u>  | 3 | 1 | 2 |  |
| <u>RETSAT</u>   | 3 | 1 | 2 |  |
| <u>RNMT</u>     | 3 | 1 | 2 |  |
| <u>RREB1</u>    | 3 | 2 | 1 |  |
| <u>SH3D21</u>   | 3 | 1 | 2 |  |
| <u>SLC25A37</u> | 3 | 1 | 2 |  |
| <u>SLC4A7</u>   | 3 | 3 | 0 |  |
| <u>SMARCE1</u>  | 3 | 1 | 2 |  |
| <u>SPG11</u>    | 3 | 2 | 1 |  |
| <u>STK39</u>    | 3 | 1 | 2 |  |
| <u>STRADA</u>   | 3 | 2 | 1 |  |
| <u>TMEM5</u>    | 3 | 2 | 1 |  |
| <u>TRIM2</u>    | 3 | 2 | 1 |  |
| <u>UBE2C</u>    | 3 | 1 | 2 |  |
| <u>UBE2D3</u>   | 3 | 2 | 1 |  |
| <u>UBE2M</u>    | 3 | 1 | 2 |  |
| <u>WDR44</u>    | 3 | 1 | 2 |  |
| <u>WIZ</u>      | 3 | 2 | 1 |  |
| <u>ZFAND1</u>   | 3 | 2 | 1 |  |
| <u>ZNF302</u>   | 3 | 2 | 1 |  |
| <u>ABHD10</u>   | 2 | 0 | 2 |  |
| <u>ACRV1</u>    | 2 | 2 | 0 |  |
| <u>ACSL3</u>    | 2 | 0 | 2 |  |
| <u>ADCY2</u>    | 2 | 2 | 0 |  |
| <u>ADH5</u>     | 2 | 0 | 2 |  |
| <u>ADO</u>      | 2 | 0 | 2 |  |
| <u>AHCYL2</u>   | 2 | 2 | 0 |  |
| <u>AK2</u>      | 2 | 0 | 2 |  |
| <u>AKAP9</u>    | 2 | 2 | 0 |  |

|                 |   |   |   |  |
|-----------------|---|---|---|--|
| <u>ALOX15B</u>  | 2 | 2 | 0 |  |
| <u>ALOX5</u>    | 2 | 2 | 0 |  |
| <u>AMACR</u>    | 2 | 2 | 0 |  |
| <u>ANKRD12</u>  | 2 | 2 | 0 |  |
| <u>ANPEP</u>    | 2 | 2 | 0 |  |
| <u>AP1S2</u>    | 2 | 2 | 0 |  |
| <u>APC</u>      | 2 | 2 | 0 |  |
| <u>APPBP2</u>   | 2 | 2 | 0 |  |
| <u>ARF6</u>     | 2 | 2 | 0 |  |
| <u>ARFIP2</u>   | 2 | 0 | 2 |  |
| <u>ARID1A</u>   | 2 | 2 | 0 |  |
| <u>ASS1</u>     | 2 | 2 | 0 |  |
| <u>ATF6</u>     | 2 | 2 | 0 |  |
| <u>ATG5</u>     | 2 | 2 | 0 |  |
| <u>ATIC</u>     | 2 | 0 | 2 |  |
| <u>ATP6V1C1</u> | 2 | 2 | 0 |  |
| <u>ATP6V1D</u>  | 2 | 2 | 0 |  |
| <u>ATP9B</u>    | 2 | 2 | 0 |  |
| <u>ATXN7</u>    | 2 | 2 | 0 |  |
| <u>BAIAP2</u>   | 2 | 2 | 0 |  |
| <u>BNIP3</u>    | 2 | 0 | 2 |  |
| <u>BPTF</u>     | 2 | 2 | 0 |  |
| <u>BST2</u>     | 2 | 0 | 2 |  |
| <u>C6ORF47</u>  | 2 | 0 | 2 |  |
| <u>C8ORF60</u>  | 2 | 2 | 0 |  |
| <u>CACYBP</u>   | 2 | 0 | 2 |  |
| <u>CADPS</u>    | 2 | 2 | 0 |  |
| <u>CALM1</u>    | 2 | 2 | 0 |  |
| <u>CAMKK2</u>   | 2 | 2 | 0 |  |
| <u>CAPRIN1</u>  | 2 | 0 | 2 |  |
| <u>CARS</u>     | 2 | 0 | 2 |  |
| <u>CASP10</u>   | 2 | 2 | 0 |  |
| <u>CC2D1A</u>   | 2 | 2 | 0 |  |
| <u>CCNL1</u>    | 2 | 2 | 0 |  |
| <u>CD2AP</u>    | 2 | 2 | 0 |  |
| <u>CD300C</u>   | 2 | 2 | 0 |  |
| <u>CD47</u>     | 2 | 2 | 0 |  |
| <u>CD68</u>     | 2 | 2 | 0 |  |
| <u>CDC42EP4</u> | 2 | 2 | 0 |  |
| <u>CDH11</u>    | 2 | 2 | 0 |  |
| <u>CDK12</u>    | 2 | 2 | 0 |  |
| <u>CDK4</u>     | 2 | 0 | 2 |  |
| <u>CDR2L</u>    | 2 | 0 | 2 |  |
| <u>CEBPD</u>    | 2 | 2 | 0 |  |
| <u>CEP152</u>   | 2 | 2 | 0 |  |
| <u>CERS4</u>    | 2 | 0 | 2 |  |
| <u>CHEK1</u>    | 2 | 2 | 0 |  |
| <u>CHRNE</u>    | 2 | 2 | 0 |  |

|                |   |   |   |  |
|----------------|---|---|---|--|
| <u>CIITA</u>   | 2 | 2 | 0 |  |
| <u>CLDN15</u>  | 2 | 2 | 0 |  |
| <u>CLEC5A</u>  | 2 | 2 | 0 |  |
| <u>CNPPD1</u>  | 2 | 0 | 2 |  |
| <u>COL4A6</u>  | 2 | 2 | 0 |  |
| <u>CPSF7</u>   | 2 | 2 | 0 |  |
| <u>CPT2</u>    | 2 | 0 | 2 |  |
| <u>CREB1</u>   | 2 | 2 | 0 |  |
| <u>CREB3</u>   | 2 | 0 | 2 |  |
| <u>CREB3L1</u> | 2 | 2 | 0 |  |
| <u>CRKL</u>    | 2 | 2 | 0 |  |
| <u>CSNK2A2</u> | 2 | 2 | 0 |  |
| <u>CTSL1</u>   | 2 | 0 | 2 |  |
| <u>CTTN</u>    | 2 | 2 | 0 |  |
| <u>CYP1A1</u>  | 2 | 0 | 2 |  |
| <u>CYP2E1</u>  | 2 | 2 | 0 |  |
| <u>CYTIP</u>   | 2 | 2 | 0 |  |
| <u>DBN1</u>    | 2 | 0 | 2 |  |
| <u>DDIT4</u>   | 2 | 2 | 0 |  |
| <u>DDX17</u>   | 2 | 2 | 0 |  |
| <u>DDX3X</u>   | 2 | 2 | 0 |  |
| <u>DENND2D</u> | 2 | 2 | 0 |  |
| <u>DKK3</u>    | 2 | 2 | 0 |  |
| <u>DLG5</u>    | 2 | 2 | 0 |  |
| <u>DNAJB14</u> | 2 | 2 | 0 |  |
| <u>DNAJB2</u>  | 2 | 0 | 2 |  |
| <u>DNAJC9</u>  | 2 | 0 | 2 |  |
| <u>DNASE2</u>  | 2 | 0 | 2 |  |
| <u>DOCK9</u>   | 2 | 2 | 0 |  |
| <u>DSG2</u>    | 2 | 0 | 2 |  |
| <u>DST</u>     | 2 | 2 | 0 |  |
| <u>EEF1G</u>   | 2 | 0 | 2 |  |
| <u>EFCAB1</u>  | 2 | 2 | 0 |  |
| <u>EFNA3</u>   | 2 | 0 | 2 |  |
| <u>EHD3</u>    | 2 | 0 | 2 |  |
| <u>EIF3G</u>   | 2 | 0 | 2 |  |
| <u>EIF5A</u>   | 2 | 2 | 0 |  |
| <u>ELF2</u>    | 2 | 2 | 0 |  |
| <u>ELK1</u>    | 2 | 2 | 0 |  |
| <u>ELK4</u>    | 2 | 2 | 0 |  |
| <u>EMR2</u>    | 2 | 2 | 0 |  |
| <u>EPHA4</u>   | 2 | 2 | 0 |  |
| <u>ERAP1</u>   | 2 | 2 | 0 |  |
| <u>ERCC2</u>   | 2 | 0 | 2 |  |
| <u>ERGIC2</u>  | 2 | 0 | 2 |  |
| <u>ETV1</u>    | 2 | 2 | 0 |  |
| <u>EXOC7</u>   | 2 | 2 | 0 |  |
| <u>EZR</u>     | 2 | 2 | 0 |  |

|                 |   |   |   |  |
|-----------------|---|---|---|--|
| <u>FAM105A</u>  | 2 | 2 | 0 |  |
| <u>FAM134A</u>  | 2 | 0 | 2 |  |
| <u>FAM198B</u>  | 2 | 2 | 0 |  |
| <u>FARSA</u>    | 2 | 0 | 2 |  |
| <u>FBXL5</u>    | 2 | 2 | 0 |  |
| <u>FBXO21</u>   | 2 | 2 | 0 |  |
| <u>FBXO7</u>    | 2 | 0 | 2 |  |
| <u>FBXW2</u>    | 2 | 0 | 2 |  |
| <u>FKBP4</u>    | 2 | 2 | 0 |  |
| <u>FOXA2</u>    | 2 | 2 | 0 |  |
| <u>FPR2</u>     | 2 | 2 | 0 |  |
| <u>FTL</u>      | 2 | 0 | 2 |  |
| <u>FZD7</u>     | 2 | 0 | 2 |  |
| <u>GALNT10</u>  | 2 | 0 | 2 |  |
| <u>GCLC</u>     | 2 | 2 | 0 |  |
| <u>GFOD1</u>    | 2 | 2 | 0 |  |
| <u>GNMT</u>     | 2 | 2 | 0 |  |
| <u>GOLGA2</u>   | 2 | 0 | 2 |  |
| <u>GOLGA3</u>   | 2 | 0 | 2 |  |
| <u>GRB7</u>     | 2 | 2 | 0 |  |
| <u>GRIN1</u>    | 2 | 2 | 0 |  |
| <u>GSK3B</u>    | 2 | 2 | 0 |  |
| <u>GSS</u>      | 2 | 0 | 2 |  |
| <u>H2BFS</u>    | 2 | 0 | 2 |  |
| <u>HECTD3</u>   | 2 | 0 | 2 |  |
| <u>HERC2</u>    | 2 | 2 | 0 |  |
| <u>HIPK1</u>    | 2 | 2 | 0 |  |
| <u>HIST1H1D</u> | 2 | 2 | 0 |  |
| <u>HIST1H1T</u> | 2 | 2 | 0 |  |
| <u>HK1</u>      | 2 | 2 | 0 |  |
| <u>HNRNPD</u>   | 2 | 2 | 0 |  |
| <u>HPCAL4</u>   | 2 | 2 | 0 |  |
| <u>HSD17B10</u> | 2 | 0 | 2 |  |
| <u>HUS1</u>     | 2 | 2 | 0 |  |
| <u>ID1</u>      | 2 | 2 | 0 |  |
| <u>IER3</u>     | 2 | 0 | 2 |  |
| <u>IFIT1</u>    | 2 | 2 | 0 |  |
| <u>IGF2R</u>    | 2 | 2 | 0 |  |
| <u>IL11</u>     | 2 | 2 | 0 |  |
| <u>IL12B</u>    | 2 | 2 | 0 |  |
| <u>IL13RA1</u>  | 2 | 2 | 0 |  |
| <u>IL1R2</u>    | 2 | 2 | 0 |  |
| <u>INPP1</u>    | 2 | 2 | 0 |  |
| <u>IQCK</u>     | 2 | 2 | 0 |  |
| <u>ITGA5</u>    | 2 | 0 | 2 |  |
| <u>ITGB1</u>    | 2 | 2 | 0 |  |
| <u>ITGB4</u>    | 2 | 2 | 0 |  |
| <u>ITPK1</u>    | 2 | 2 | 0 |  |

|                 |   |   |   |  |
|-----------------|---|---|---|--|
| <u>KARS</u>     | 2 | 0 | 2 |  |
| <u>KAZALD1</u>  | 2 | 0 | 2 |  |
| <u>KCTD9</u>    | 2 | 2 | 0 |  |
| <u>KDM4C</u>    | 2 | 2 | 0 |  |
| <u>KIAA1324</u> | 2 | 2 | 0 |  |
| <u>KLK5</u>     | 2 | 2 | 0 |  |
| <u>KLK7</u>     | 2 | 2 | 0 |  |
| <u>KRR1</u>     | 2 | 0 | 2 |  |
| <u>KRT6A</u>    | 2 | 2 | 0 |  |
| <u>LAP3</u>     | 2 | 2 | 0 |  |
| <u>LARP4B</u>   | 2 | 2 | 0 |  |
| <u>LG11</u>     | 2 | 2 | 0 |  |
| <u>LIN7C</u>    | 2 | 2 | 0 |  |
| <u>LINS</u>     | 2 | 2 | 0 |  |
| <u>MAN1A2</u>   | 2 | 2 | 0 |  |
| <u>MAP3K5</u>   | 2 | 0 | 2 |  |
| <u>MASP2</u>    | 2 | 2 | 0 |  |
| <u>MAT2A</u>    | 2 | 0 | 2 |  |
| <u>MAU2</u>     | 2 | 2 | 0 |  |
| <u>MCL1</u>     | 2 | 0 | 2 |  |
| <u>MCMBP</u>    | 2 | 0 | 2 |  |
| <u>MEF2A</u>    | 2 | 2 | 0 |  |
| <u>MEOX1</u>    | 2 | 0 | 2 |  |
| <u>METTL21D</u> | 2 | 0 | 2 |  |
| <u>MGAT4B</u>   | 2 | 0 | 2 |  |
| <u>MIOS</u>     | 2 | 2 | 0 |  |
| <u>MORC2</u>    | 2 | 0 | 2 |  |
| <u>MRPL34</u>   | 2 | 0 | 2 |  |
| <u>MRPL52</u>   | 2 | 0 | 2 |  |
| <u>MRPS27</u>   | 2 | 0 | 2 |  |
| <u>MSR1</u>     | 2 | 2 | 0 |  |
| <u>MUC8</u>     | 2 | 2 | 0 |  |
| <u>MUM1</u>     | 2 | 0 | 2 |  |
| <u>MVP</u>      | 2 | 2 | 0 |  |
| <u>MYB</u>      | 2 | 2 | 0 |  |
| <u>MYBL2</u>    | 2 | 2 | 0 |  |
| <u>MYLK3</u>    | 2 | 0 | 2 |  |
| <u>MYO1B</u>    | 2 | 2 | 0 |  |
| <u>NACA</u>     | 2 | 0 | 2 |  |
| <u>NDUFB2</u>   | 2 | 2 | 0 |  |
| <u>NEK4</u>     | 2 | 0 | 2 |  |
| <u>NEMF</u>     | 2 | 0 | 2 |  |
| <u>NF1</u>      | 2 | 2 | 0 |  |
| <u>NFE2L2</u>   | 2 | 2 | 0 |  |
| <u>NFYA</u>     | 2 | 2 | 0 |  |
| <u>NKTR</u>     | 2 | 0 | 2 |  |
| <u>NLRP3</u>    | 2 | 2 | 0 |  |
| <u>NOS2</u>     | 2 | 0 | 2 |  |

|                |   |   |   |  |
|----------------|---|---|---|--|
| <u>NPPA</u>    | 2 | 2 | 0 |  |
| <u>NPPB</u>    | 2 | 2 | 0 |  |
| <u>NR1H2</u>   | 2 | 2 | 0 |  |
| <u>NR4A1</u>   | 2 | 2 | 0 |  |
| <u>NRXN3</u>   | 2 | 2 | 0 |  |
| <u>OGT</u>     | 2 | 2 | 0 |  |
| <u>OPA3</u>    | 2 | 0 | 2 |  |
| <u>OR51E2</u>  | 2 | 2 | 0 |  |
| <u>P2RY2</u>   | 2 | 0 | 2 |  |
| <u>PANX1</u>   | 2 | 0 | 2 |  |
| <u>PARP2</u>   | 2 | 0 | 2 |  |
| <u>PCGF3</u>   | 2 | 2 | 0 |  |
| <u>PDE5A</u>   | 2 | 2 | 0 |  |
| <u>PDGFB</u>   | 2 | 2 | 0 |  |
| <u>PDHX</u>    | 2 | 2 | 0 |  |
| <u>PEA15</u>   | 2 | 2 | 0 |  |
| <u>PEX14</u>   | 2 | 0 | 2 |  |
| <u>PFKFB2</u>  | 2 | 2 | 0 |  |
| <u>PFKM</u>    | 2 | 0 | 2 |  |
| <u>PHB</u>     | 2 | 0 | 2 |  |
| <u>PHF10</u>   | 2 | 0 | 2 |  |
| <u>PHGDH</u>   | 2 | 0 | 2 |  |
| <u>PHIP</u>    | 2 | 2 | 0 |  |
| <u>PHLPP1</u>  | 2 | 2 | 0 |  |
| <u>PICALM</u>  | 2 | 2 | 0 |  |
| <u>PIEZO2</u>  | 2 | 0 | 2 |  |
| <u>PIN1</u>    | 2 | 0 | 2 |  |
| <u>PLAUR</u>   | 2 | 0 | 2 |  |
| <u>PLEKHA1</u> | 2 | 0 | 2 |  |
| <u>PLEKHG3</u> | 2 | 2 | 0 |  |
| <u>PLIN2</u>   | 2 | 2 | 0 |  |
| <u>PLLP</u>    | 2 | 2 | 0 |  |
| <u>PNP</u>     | 2 | 0 | 2 |  |
| <u>PPIE</u>    | 2 | 0 | 2 |  |
| <u>PPP1CA</u>  | 2 | 0 | 2 |  |
| <u>PRKAR2A</u> | 2 | 2 | 0 |  |
| <u>PRKX</u>    | 2 | 2 | 0 |  |
| <u>PRMT5</u>   | 2 | 0 | 2 |  |
| <u>PRPF4B</u>  | 2 | 2 | 0 |  |
| <u>PRSS22</u>  | 2 | 2 | 0 |  |
| <u>PRSS23</u>  | 2 | 0 | 2 |  |
| <u>PSG9</u>    | 2 | 2 | 0 |  |
| <u>PSMA7</u>   | 2 | 0 | 2 |  |
| <u>PSMG1</u>   | 2 | 0 | 2 |  |
| <u>PSPH</u>    | 2 | 0 | 2 |  |
| <u>PTPN2</u>   | 2 | 0 | 2 |  |
| <u>PTPN21</u>  | 2 | 2 | 0 |  |
| <u>PYCR1</u>   | 2 | 0 | 2 |  |

|                 |   |   |   |  |
|-----------------|---|---|---|--|
| <u>PYGL</u>     | 2 | 2 | 0 |  |
| <u>OKI</u>      | 2 | 2 | 0 |  |
| <u>RAB28</u>    | 2 | 2 | 0 |  |
| <u>RAP1A</u>    | 2 | 2 | 0 |  |
| <u>RARG</u>     | 2 | 2 | 0 |  |
| <u>RB1</u>      | 2 | 2 | 0 |  |
| <u>RNASEH1</u>  | 2 | 0 | 2 |  |
| <u>RNF24</u>    | 2 | 2 | 0 |  |
| <u>RPL22</u>    | 2 | 0 | 2 |  |
| <u>RPL35</u>    | 2 | 0 | 2 |  |
| <u>RPL6</u>     | 2 | 0 | 2 |  |
| <u>RPS2</u>     | 2 | 0 | 2 |  |
| <u>RPS9</u>     | 2 | 0 | 2 |  |
| <u>RPUSD2</u>   | 2 | 0 | 2 |  |
| <u>RRNAD1</u>   | 2 | 0 | 2 |  |
| <u>RRP9</u>     | 2 | 0 | 2 |  |
| <u>RUFY1</u>    | 2 | 0 | 2 |  |
| <u>S100A8</u>   | 2 | 2 | 0 |  |
| <u>SAP30</u>    | 2 | 2 | 0 |  |
| <u>SCAMP1</u>   | 2 | 0 | 2 |  |
| <u>SCNN1G</u>   | 2 | 2 | 0 |  |
| <u>SDHAF1</u>   | 2 | 0 | 2 |  |
| <u>SECISBP2</u> | 2 | 0 | 2 |  |
| <u>SELL</u>     | 2 | 0 | 2 |  |
| <u>SERPINB9</u> | 2 | 2 | 0 |  |
| <u>SET</u>      | 2 | 0 | 2 |  |
| <u>SHC1</u>     | 2 | 2 | 0 |  |
| <u>SIGLEC7</u>  | 2 | 2 | 0 |  |
| <u>SKIV2L</u>   | 2 | 0 | 2 |  |
| <u>SLC25A13</u> | 2 | 0 | 2 |  |
| <u>SLC25A46</u> | 2 | 0 | 2 |  |
| <u>SLC39A4</u>  | 2 | 2 | 0 |  |
| <u>SLC45A2</u>  | 2 | 2 | 0 |  |
| <u>SMAP1</u>    | 2 | 2 | 0 |  |
| <u>SMC5</u>     | 2 | 2 | 0 |  |
| <u>SNAI2</u>    | 2 | 2 | 0 |  |
| <u>SNX16</u>    | 2 | 2 | 0 |  |
| <u>SNX6</u>     | 2 | 0 | 2 |  |
| <u>SOCS5</u>    | 2 | 2 | 0 |  |
| <u>SORBS1</u>   | 2 | 2 | 0 |  |
| <u>SORBS3</u>   | 2 | 0 | 2 |  |
| <u>SOS2</u>     | 2 | 2 | 0 |  |
| <u>SOX2</u>     | 2 | 2 | 0 |  |
| <u>SOX4</u>     | 2 | 0 | 2 |  |
| <u>SP110</u>    | 2 | 0 | 2 |  |
| <u>SPAST</u>    | 2 | 2 | 0 |  |
| <u>SPATA20</u>  | 2 | 2 | 0 |  |
| <u>SPR</u>      | 2 | 2 | 0 |  |

|                 |   |   |   |  |
|-----------------|---|---|---|--|
| <u>SPRED2</u>   | 2 | 2 | 0 |  |
| <u>SOLE</u>     | 2 | 2 | 0 |  |
| <u>SRCAP</u>    | 2 | 2 | 0 |  |
| <u>SRGAP3</u>   | 2 | 2 | 0 |  |
| <u>SSBP1</u>    | 2 | 2 | 0 |  |
| <u>STAMBP</u>   | 2 | 0 | 2 |  |
| <u>STAT3</u>    | 2 | 2 | 0 |  |
| <u>STAT5B</u>   | 2 | 0 | 2 |  |
| <u>STK25</u>    | 2 | 0 | 2 |  |
| <u>STK3</u>     | 2 | 2 | 0 |  |
| <u>STMN1</u>    | 2 | 0 | 2 |  |
| <u>STOML2</u>   | 2 | 2 | 0 |  |
| <u>STRN</u>     | 2 | 2 | 0 |  |
| <u>SUV39H2</u>  | 2 | 0 | 2 |  |
| <u>TAF4</u>     | 2 | 2 | 0 |  |
| <u>TARP</u>     | 2 | 2 | 0 |  |
| <u>TBKBP1</u>   | 2 | 0 | 2 |  |
| <u>TBL3</u>     | 2 | 0 | 2 |  |
| <u>TCEA2</u>    | 2 | 0 | 2 |  |
| <u>TCF12</u>    | 2 | 2 | 0 |  |
| <u>TCIRG1</u>   | 2 | 2 | 0 |  |
| <u>TCTA</u>     | 2 | 0 | 2 |  |
| <u>TFAP2C</u>   | 2 | 2 | 0 |  |
| <u>TFCP2L1</u>  | 2 | 0 | 2 |  |
| <u>TJP3</u>     | 2 | 0 | 2 |  |
| <u>TLE6</u>     | 2 | 0 | 2 |  |
| <u>TMEM144</u>  | 2 | 2 | 0 |  |
| <u>TMEM176A</u> | 2 | 2 | 0 |  |
| <u>TMEM97</u>   | 2 | 0 | 2 |  |
| <u>TMPRSS2</u>  | 2 | 2 | 0 |  |
| <u>TNFAIP2</u>  | 2 | 2 | 0 |  |
| <u>TNPO1</u>    | 2 | 0 | 2 |  |
| <u>TNS3</u>     | 2 | 0 | 2 |  |
| <u>TOMM20</u>   | 2 | 0 | 2 |  |
| <u>TOMM22</u>   | 2 | 2 | 0 |  |
| <u>TOP2B</u>    | 2 | 2 | 0 |  |
| <u>TOPORS</u>   | 2 | 2 | 0 |  |
| <u>TP63</u>     | 2 | 2 | 0 |  |
| <u>TPP1</u>     | 2 | 2 | 0 |  |
| <u>TPSB2</u>    | 2 | 0 | 2 |  |
| <u>TRAM1</u>    | 2 | 0 | 2 |  |
| <u>TRPC6</u>    | 2 | 2 | 0 |  |
| <u>TSPAN3</u>   | 2 | 0 | 2 |  |
| <u>TXLNA</u>    | 2 | 0 | 2 |  |
| <u>UBE2D1</u>   | 2 | 2 | 0 |  |
| <u>UBE2G1</u>   | 2 | 2 | 0 |  |
| <u>UBE2S</u>    | 2 | 0 | 2 |  |
| <u>UBR2</u>     | 2 | 2 | 0 |  |

|                  |   |   |   |  |
|------------------|---|---|---|--|
| <u>UBR7</u>      | 2 | 0 | 2 |  |
| <u>UFL1</u>      | 2 | 2 | 0 |  |
| <u>UGT2B17</u>   | 2 | 2 | 0 |  |
| <u>UHRF1BP1L</u> | 2 | 2 | 0 |  |
| <u>UPF3A</u>     | 2 | 0 | 2 |  |
| <u>UQCR11</u>    | 2 | 0 | 2 |  |
| <u>USP7</u>      | 2 | 2 | 0 |  |
| <u>UTP6</u>      | 2 | 0 | 2 |  |
| <u>VPS13C</u>    | 2 | 2 | 0 |  |
| <u>WDTC1</u>     | 2 | 0 | 2 |  |
| <u>WISP2</u>     | 2 | 2 | 0 |  |
| <u>WWTR1</u>     | 2 | 2 | 0 |  |
| <u>XIAP</u>      | 2 | 2 | 0 |  |
| <u>XPO4</u>      | 2 | 2 | 0 |  |
| <u>XRCC1</u>     | 2 | 0 | 2 |  |
| ZBTB39           | 2 | 0 | 2 |  |
| <u>ZBTB7A</u>    | 2 | 2 | 0 |  |
| <u>ZDHHC4</u>    | 2 | 0 | 2 |  |
| <u>ZDHHC6</u>    | 2 | 0 | 2 |  |
| ZHX2             | 2 | 2 | 0 |  |
| ZNF204P          | 2 | 2 | 0 |  |
| ZNF442           | 2 | 2 | 0 |  |
| ZNF536           | 2 | 2 | 0 |  |

## Complex 5

### mRNA based prediction result

| Pa    | Pi    | DownRegulation  | Pa    | Pi    | UpRegulation    |
|-------|-------|-----------------|-------|-------|-----------------|
| 0.846 | 0.020 | <u>TRAF5</u>    | 0.881 | 0.028 | <u>AURKA</u>    |
| 0.772 | 0.061 | <u>ADORA2B</u>  | 0.772 | 0.061 | <u>PFKFB2</u>   |
| 0.772 | 0.061 | <u>CDCA4</u>    | 0.772 | 0.061 | <u>SH3BGRL</u>  |
| 0.772 | 0.061 | <u>CENPJ</u>    | 0.772 | 0.061 | <u>TRIM13</u>   |
| 0.772 | 0.061 | <u>DNAJC9</u>   | 0.761 | 0.064 | <u>DNAJB14</u>  |
| 0.772 | 0.061 | <u>DONSON</u>   | 0.711 | 0.045 | <u>GAS6</u>     |
| 0.772 | 0.061 | <u>HAUS8</u>    | 0.724 | 0.075 | <u>CACNG4</u>   |
| 0.772 | 0.061 | <u>MCMBP</u>    | 0.724 | 0.075 | <u>CHRNE</u>    |
| 0.772 | 0.061 | <u>NUP155</u>   | 0.673 | 0.049 | <u>WISP2</u>    |
| 0.772 | 0.061 | <u>PARP2</u>    | 0.694 | 0.080 | <u>SFRP1</u>    |
| 0.772 | 0.061 | <u>RMI1</u>     | 0.686 | 0.109 | <u>PBK</u>      |
| 0.772 | 0.061 | <u>SCARA3</u>   | 0.682 | 0.105 | <u>PPP1CB</u>   |
| 0.772 | 0.061 | <u>SLC16A14</u> | 0.599 | 0.024 | <u>COX5B</u>    |
| 0.772 | 0.061 | <u>SUV39H2</u>  | 0.634 | 0.090 | <u>KCNH2</u>    |
| 0.747 | 0.047 | <u>CAPRIN1</u>  | 0.634 | 0.090 | <u>PLLP</u>     |
| 0.700 | 0.078 | <u>GSS</u>      | 0.634 | 0.090 | <u>SLC25A4</u>  |
| 0.688 | 0.073 | <u>CXCL2</u>    | 0.634 | 0.090 | <u>ZYX</u>      |
| 0.707 | 0.100 | <u>C9ORF40</u>  | 0.608 | 0.067 | <u>CHEK1</u>    |
| 0.586 | 0.034 | <u>CCL5</u>     | 0.655 | 0.117 | <u>SERPINB8</u> |
| 0.613 | 0.062 | <u>POC1A</u>    | 0.610 | 0.079 | <u>TRIOBP</u>   |
| 0.634 | 0.090 | <u>MAST4</u>    | 0.620 | 0.093 | <u>SQLE</u>     |
| 0.634 | 0.090 | <u>MSH5</u>     | 0.626 | 0.108 | <u>SLC4A11</u>  |
| 0.634 | 0.090 | <u>TREX1</u>    | 0.607 | 0.092 | <u>KRT6A</u>    |
| 0.660 | 0.118 | <u>TMSB15A</u>  | 0.566 | 0.061 | <u>HMGCR</u>    |
| 0.686 | 0.159 | <u>TBC1D9</u>   | 0.592 | 0.092 | <u>CASP2</u>    |
| 0.615 | 0.097 | <u>PPIH</u>     | 0.611 | 0.120 | <u>UGT2B15</u>  |
| 0.609 | 0.106 | <u>NPM1</u>     | 0.626 | 0.137 | <u>TRIP13</u>   |
| 0.562 | 0.077 | <u>DIO2</u>     | 0.543 | 0.060 | <u>GAL</u>      |
| 0.620 | 0.135 | <u>TPM1</u>     | 0.591 | 0.109 | <u>CMBL</u>     |
| 0.504 | 0.023 | <u>HOXA10</u>   | 0.578 | 0.104 | <u>FADS1</u>    |
| 0.582 | 0.105 | <u>NCOA1</u>    | 0.542 | 0.069 | <u>GNMT</u>     |
| 0.600 | 0.125 | <u>PLEC</u>     | 0.586 | 0.115 | <u>CREB3L1</u>  |
| 0.592 | 0.119 | <u>MAPK8</u>    | 0.586 | 0.115 | <u>RNASEL</u>   |
| 0.510 | 0.041 | <u>CAB39</u>    | 0.587 | 0.130 | <u>COL22A1</u>  |
| 0.580 | 0.112 | <u>GPLD1</u>    | 0.587 | 0.130 | <u>KLK13</u>    |
| 0.560 | 0.096 | <u>TANC1</u>    | 0.540 | 0.088 | <u>HOXA11</u>   |
| 0.552 | 0.100 | <u>MYNN</u>     | 0.527 | 0.075 | <u>ABCA1</u>    |
| 0.557 | 0.112 | <u>HPS5</u>     | 0.596 | 0.145 | <u>GFRA1</u>    |
| 0.562 | 0.117 | <u>CXCR7</u>    | 0.615 | 0.165 | <u>UBE2C</u>    |
| 0.546 | 0.105 | <u>ABCC5</u>    | 0.563 | 0.119 | <u>MCM6</u>     |
| 0.552 | 0.113 | <u>CTSL2</u>    | 0.563 | 0.119 | <u>MCM7</u>     |
| 0.552 | 0.113 | <u>GPR19</u>    | 0.561 | 0.121 | <u>CYP2S1</u>   |
| 0.552 | 0.113 | <u>LFNG</u>     | 0.552 | 0.113 | <u>CNN2</u>     |

|       |       |               |       |       |                |
|-------|-------|---------------|-------|-------|----------------|
| 0.552 | 0.113 | <u>MIR20B</u> | 0.552 | 0.113 | <u>DYSF</u>    |
| 0.552 | 0.113 | <u>NUP54</u>  | 0.552 | 0.113 | <u>FAM110C</u> |
| 0.552 | 0.113 | <u>PRR16</u>  | 0.552 | 0.113 | <u>MYO5B</u>   |
| 0.552 | 0.113 | <u>SP4</u>    | 0.552 | 0.113 | <u>PPFIBP2</u> |
| 0.572 | 0.142 | <u>RPRM</u>   | 0.563 | 0.128 | <u>CDC20</u>   |
| 0.559 | 0.134 | <u>YPEL5</u>  | 0.603 | 0.172 | <u>RACGAP1</u> |
| 0.529 | 0.111 | <u>NDE1</u>   | 0.534 | 0.120 | <u>BRMS1</u>   |
| 0.505 | 0.099 | <u>INCENP</u> | 0.553 | 0.145 | <u>MT1L</u>    |
| 0.550 | 0.157 | <u>ERCC2</u>  | 0.535 | 0.142 | <u>WT1</u>     |
| 0.513 | 0.123 | <u>HSPA6</u>  | 0.520 | 0.150 | <u>BLM</u>     |
| 0.512 | 0.147 | <u>ZBTB10</u> | 0.507 | 0.154 | <u>ST3GAL1</u> |
| 0.540 | 0.181 | <u>RPS19</u>  |       |       |                |
| 0.511 | 0.212 | <u>HIFX</u>   |       |       |                |

### Protein based prediction result

| Pa    | Pi    | DownRegulation | Pa    | Pi    | UpRegulation  |
|-------|-------|----------------|-------|-------|---------------|
| 0.860 | 0.024 | <u>CHEK1</u>   | 0.672 | 0.051 | <u>NPPB</u>   |
| 0.695 | 0.018 | <u>MDM2</u>    | 0.643 | 0.055 | <u>AR</u>     |
| 0.550 | 0.021 | <u>PRKCA</u>   | 0.534 | 0.049 | <u>CYP3A4</u> |
|       |       |                | 0.506 | 0.041 | <u>KRT18</u>  |
|       |       |                | 0.516 | 0.063 | <u>PRDX4</u>  |
|       |       |                | 0.516 | 0.165 | <u>CD83</u>   |

### MCF7 based prediction result

| Pa    | Pi    | DownRegulation  | Pa    | Pi    | UpRegulation    |
|-------|-------|-----------------|-------|-------|-----------------|
| 0.817 | 0.017 | <u>FOXO1</u>    | 0.812 | 0.028 | <u>CLDN9</u>    |
| 0.783 | 0.040 | <u>LTBP3</u>    | 0.779 | 0.014 | <u>CDKN1B</u>   |
| 0.702 | 0.039 | <u>PTPN18</u>   | 0.784 | 0.021 | <u>C11orf68</u> |
| 0.742 | 0.092 | <u>UBE2C</u>    | 0.783 | 0.025 | <u>ZNF672</u>   |
| 0.666 | 0.033 | <u>H2AFX</u>    | 0.769 | 0.014 | <u>RANGAP1</u>  |
| 0.671 | 0.040 | <u>SUCO</u>     | 0.793 | 0.038 | <u>CLCF1</u>    |
| 0.663 | 0.032 | <u>NFE2L3</u>   | 0.784 | 0.036 | <u>MSRB2</u>    |
| 0.709 | 0.085 | <u>C2CD2</u>    | 0.765 | 0.027 | <u>ABCB6</u>    |
| 0.674 | 0.052 | <u>PRRC1</u>    | 0.717 | 0.032 | <u>PGM1</u>     |
| 0.647 | 0.027 | <u>NREP</u>     | 0.693 | 0.057 | <u>IFIT5</u>    |
| 0.663 | 0.046 | <u>CCDC85B</u>  | 0.669 | 0.044 | <u>GPRC5C</u>   |
| 0.663 | 0.046 | <u>KIAA0101</u> | 0.656 | 0.035 | <u>SLC4A7</u>   |
| 0.645 | 0.029 | <u>KCNQ1</u>    | 0.630 | 0.028 | <u>DNAJB2</u>   |
| 0.636 | 0.023 | <u>BBS4</u>     | 0.652 | 0.052 | <u>PLA2G3</u>   |
| 0.649 | 0.042 | <u>ARHGAP10</u> | 0.666 | 0.077 | <u>BTG2</u>     |
| 0.620 | 0.028 | <u>MRPL34</u>   | 0.610 | 0.024 | <u>TROAP</u>    |
| 0.633 | 0.042 | <u>DPH2</u>     | 0.604 | 0.020 | <u>RGS17</u>    |
| 0.604 | 0.021 | <u>UBIAD1</u>   | 0.634 | 0.054 | <u>BORA</u>     |
| 0.590 | 0.015 | <u>CIAO1</u>    | 0.664 | 0.084 | <u>CHD3</u>     |
| 0.613 | 0.039 | <u>OGFR</u>     | 0.638 | 0.060 | <u>FOXC1</u>    |

|       |       |                 |       |       |                  |
|-------|-------|-----------------|-------|-------|------------------|
| 0.643 | 0.073 | <u>SFSWAP</u>   | 0.610 | 0.033 | <u>HEG1</u>      |
| 0.616 | 0.048 | <u>STC2</u>     | 0.602 | 0.030 | <u>GCLC</u>      |
| 0.609 | 0.042 | <u>SIDT1</u>    | 0.633 | 0.063 | <u>BNIP3L</u>    |
| 0.624 | 0.057 | <u>CPTP</u>     | 0.589 | 0.020 | <u>LSM14A</u>    |
| 0.610 | 0.046 | <u>CHAF1A</u>   | 0.617 | 0.049 | <u>RAB40B</u>    |
| 0.582 | 0.019 | <u>CD3EAP</u>   | 0.577 | 0.013 | <u>ANGEL2</u>    |
| 0.604 | 0.041 | <u>RELA</u>     | 0.590 | 0.027 | <u>DIP2C</u>     |
| 0.612 | 0.054 | <u>SNAPC4</u>   | 0.606 | 0.043 | <u>TRIM23</u>    |
| 0.591 | 0.037 | <u>DIEXF</u>    | 0.613 | 0.053 | <u>ZNF217</u>    |
| 0.625 | 0.074 | <u>SBF1</u>     | 0.631 | 0.074 | <u>WISP2</u>     |
| 0.613 | 0.070 | <u>LPCAT4</u>   | 0.595 | 0.039 | <u>ZNF211</u>    |
| 0.585 | 0.043 | <u>PIK3R1</u>   | 0.586 | 0.034 | <u>SCAND2P</u>   |
| 0.580 | 0.038 | <u>CHAF1B</u>   | 0.566 | 0.015 | <u>CDS2</u>      |
| 0.597 | 0.056 | <u>RBPM5</u>    | 0.603 | 0.052 | <u>DLG3</u>      |
| 0.574 | 0.035 | <u>BCL2</u>     | 0.604 | 0.054 | <u>CSRP2</u>     |
| 0.558 | 0.020 | <u>SMCO4</u>    | 0.579 | 0.031 | <u>TRMT11</u>    |
| 0.553 | 0.016 | <u>GMCL1</u>    | 0.595 | 0.048 | <u>CLCN3</u>     |
| 0.600 | 0.064 | <u>GIT2</u>     | 0.584 | 0.039 | <u>ZNF451</u>    |
| 0.622 | 0.086 | <u>ADCY9</u>    | 0.593 | 0.050 | <u>ZNF222</u>    |
| 0.561 | 0.025 | <u>HGSNAT</u>   | 0.557 | 0.014 | <u>SPR</u>       |
| 0.572 | 0.036 | <u>VDR</u>      | 0.579 | 0.036 | <u>NIPBL</u>     |
| 0.611 | 0.079 | <u>FZD2</u>     | 0.594 | 0.055 | <u>SCML1</u>     |
| 0.590 | 0.060 | <u>ZC3HAV1</u>  | 0.581 | 0.043 | <u>GABARAPL1</u> |
| 0.567 | 0.038 | <u>PDZK1</u>    | 0.575 | 0.040 | <u>PIK3IP1</u>   |
| 0.570 | 0.041 | <u>NOP2</u>     | 0.582 | 0.047 | <u>ID3</u>       |
| 0.556 | 0.027 | <u>MYD88</u>    | 0.546 | 0.014 | <u>UBXN4</u>     |
| 0.585 | 0.057 | <u>KIAA0368</u> | 0.563 | 0.034 | <u>ZFAND5</u>    |
| 0.564 | 0.037 | <u>METTL1</u>   | 0.565 | 0.036 | <u>ADM</u>       |
| 0.589 | 0.067 | <u>SLC12A2</u>  | 0.578 | 0.050 | <u>TXNIP</u>     |
| 0.564 | 0.043 | <u>JADE2</u>    | 0.538 | 0.011 | <u>HSPB8</u>     |
| 0.554 | 0.035 | <u>APIAR</u>    | 0.559 | 0.034 | <u>STYK1</u>     |
| 0.583 | 0.063 | <u>FBXL14</u>   | 0.566 | 0.042 | <u>PPM1E</u>     |
| 0.552 | 0.033 | <u>THAP4</u>    | 0.560 | 0.036 | <u>STK17A</u>    |
| 0.592 | 0.074 | <u>SRSF6</u>    | 0.553 | 0.028 | <u>PRNP</u>      |
| 0.567 | 0.049 | <u>ZFYVE21</u>  | 0.572 | 0.049 | <u>VAMP4</u>     |
| 0.547 | 0.029 | <u>RIBC2</u>    | 0.559 | 0.037 | <u>ZNF200</u>    |
| 0.574 | 0.056 | <u>FLJ10038</u> | 0.573 | 0.052 | <u>SLC9A1</u>    |
| 0.580 | 0.063 | <u>FKBPL</u>    | 0.561 | 0.041 | <u>PTRF</u>      |
| 0.556 | 0.039 | <u>ICAM3</u>    | 0.561 | 0.043 | <u>SPAG9</u>     |
| 0.596 | 0.079 | <u>PLK1</u>     | 0.579 | 0.062 | <u>NFKBIB</u>    |
| 0.552 | 0.036 | <u>RBM12</u>    | 0.557 | 0.044 | <u>MINOS1P1</u>  |
| 0.570 | 0.054 | <u>SMAD7</u>    | 0.570 | 0.057 | <u>ZNF329</u>    |
| 0.555 | 0.040 | <u>CISH</u>     | 0.546 | 0.034 | <u>SORBS1</u>    |
| 0.561 | 0.047 | <u>MMACHC</u>   | 0.560 | 0.048 | <u>HIST2H2BE</u> |
| 0.555 | 0.042 | <u>MAST4</u>    | 0.577 | 0.066 | <u>INTS6</u>     |
| 0.600 | 0.089 | <u>EXOSC4</u>   | 0.554 | 0.043 | <u>SIAH1</u>     |
| 0.577 | 0.065 | <u>PANX1</u>    | 0.543 | 0.036 | <u>DNAJB4</u>    |

|       |       |                 |       |       |                   |
|-------|-------|-----------------|-------|-------|-------------------|
| 0.547 | 0.037 | <u>FJX1</u>     | 0.526 | 0.020 | <u>MICB</u>       |
| 0.559 | 0.050 | <u>FASTKD1</u>  | 0.560 | 0.055 | <u>LYPD3</u>      |
| 0.560 | 0.052 | <u>PSMD12</u>   | 0.533 | 0.029 | <u>PHLPP1</u>     |
| 0.580 | 0.073 | <u>C1orf174</u> | 0.517 | 0.014 | <u>BBX</u>        |
| 0.530 | 0.023 | <u>C10orf2</u>  | 0.520 | 0.018 | <u>PPP3CC</u>     |
| 0.544 | 0.038 | <u>THG1L</u>    | 0.567 | 0.068 | <u>PALLD</u>      |
| 0.531 | 0.024 | <u>MREG</u>     | 0.535 | 0.038 | <u>WDR47</u>      |
| 0.541 | 0.035 | <u>URB2</u>     | 0.552 | 0.056 | <u>N4BP2L2</u>    |
| 0.550 | 0.045 | <u>FAM102A</u>  | 0.526 | 0.031 | <u>UBE2H</u>      |
| 0.535 | 0.031 | <u>RET</u>      | 0.581 | 0.088 | <u>TMEM41B</u>    |
| 0.549 | 0.044 | <u>ABR</u>      | 0.522 | 0.030 | <u>OSBP</u>       |
| 0.575 | 0.071 | <u>ESPL1</u>    | 0.516 | 0.026 | <u>ATXN7</u>      |
| 0.551 | 0.048 | <u>AKAP1</u>    | 0.547 | 0.058 | <u>TFE3</u>       |
| 0.582 | 0.079 | <u>HOMER3</u>   | 0.514 | 0.027 | <u>RSRC2</u>      |
| 0.529 | 0.027 | <u>ABLIM1</u>   | 0.573 | 0.087 | <u>STRN</u>       |
| 0.580 | 0.079 | <u>RERE</u>     | 0.513 | 0.028 | <u>ADGRG6</u>     |
| 0.558 | 0.057 | <u>HYAL2</u>    | 0.552 | 0.067 | <u>DENND5A</u>    |
| 0.516 | 0.019 | <u>PRKCD</u>    | 0.527 | 0.043 | <u>EIF2AK3</u>    |
| 0.542 | 0.046 | <u>TNS3</u>     | 0.522 | 0.039 | <u>BAG2</u>       |
| 0.522 | 0.026 | <u>DSCC1</u>    | 0.504 | 0.021 | <u>BRAP</u>       |
| 0.530 | 0.035 | <u>HSPBAP1</u>  | 0.537 | 0.054 | <u>CLIP1</u>      |
| 0.539 | 0.044 | <u>TSEN2</u>    | 0.521 | 0.038 | <u>PPP3R1</u>     |
| 0.546 | 0.053 | <u>FAM3C</u>    | 0.512 | 0.029 | <u>PCYT1A</u>     |
| 0.548 | 0.056 | <u>CDKN2C</u>   | 0.527 | 0.045 | <u>RANBP9</u>     |
| 0.544 | 0.052 | <u>KIAA0125</u> | 0.506 | 0.025 | <u>MED6</u>       |
| 0.584 | 0.093 | <u>KIF18B</u>   | 0.520 | 0.039 | <u>SLC5A3</u>     |
| 0.540 | 0.049 | <u>INHBB</u>    | 0.508 | 0.028 | <u>SLBP</u>       |
| 0.567 | 0.077 | <u>IRX5</u>     | 0.502 | 0.022 | <u>SLC39A14</u>   |
| 0.531 | 0.041 | <u>PPP1R10</u>  | 0.538 | 0.057 | <u>SCYL3</u>      |
| 0.549 | 0.059 | <u>TCAF1</u>    | 0.510 | 0.030 | <u>MTUS1</u>      |
| 0.542 | 0.053 | <u>METTL21B</u> | 0.506 | 0.027 | <u>SQRL</u>       |
| 0.515 | 0.027 | <u>PER2</u>     | 0.579 | 0.100 | <u>DLX2</u>       |
| 0.532 | 0.047 | <u>MYB</u>      | 0.521 | 0.043 | <u>ZNF654</u>     |
| 0.522 | 0.037 | <u>CDC42EP2</u> | 0.509 | 0.032 | <u>KDM6A</u>      |
| 0.564 | 0.079 | <u>PANK2</u>    | 0.509 | 0.032 | <u>FERMT2</u>     |
| 0.559 | 0.075 | <u>MARCH8</u>   | 0.502 | 0.027 | <u>MTMR11</u>     |
| 0.547 | 0.063 | <u>CCDC101</u>  | 0.512 | 0.037 | <u>COQ10B</u>     |
| 0.612 | 0.128 | <u>PURA</u>     | 0.578 | 0.104 | <u>ZFP36L1</u>    |
| 0.518 | 0.035 | <u>MAP6D1</u>   | 0.520 | 0.045 | <u>BRF2</u>       |
| 0.511 | 0.028 | <u>SACS</u>     | 0.508 | 0.033 | <u>KDM5B</u>      |
| 0.517 | 0.034 | <u>LRIG1</u>    | 0.503 | 0.028 | <u>FRYL</u>       |
| 0.522 | 0.039 | <u>HEATR6</u>   | 0.518 | 0.045 | <u>MAP3K14</u>    |
| 0.550 | 0.067 | <u>PCBP1</u>    | 0.559 | 0.088 | <u>KCTD5</u>      |
| 0.533 | 0.051 | <u>UMPS</u>     | 0.516 | 0.044 | <u>HIST2H2AA3</u> |
| 0.527 | 0.045 | <u>TST</u>      | 0.506 | 0.035 | <u>GATA3</u>      |
| 0.523 | 0.042 | <u>NAT1</u>     | 0.537 | 0.068 | <u>FBXL5</u>      |
| 0.530 | 0.049 | <u>ASUN</u>     | 0.509 | 0.041 | <u>UBE2W</u>      |

|       |       |                 |       |       |                  |
|-------|-------|-----------------|-------|-------|------------------|
| 0.520 | 0.040 | <u>FAM134A</u>  | 0.547 | 0.079 | <u>STX3</u>      |
| 0.541 | 0.061 | <u>CTPS1</u>    | 0.534 | 0.066 | <u>ALDOC</u>     |
| 0.509 | 0.031 | <u>GDAP2</u>    | 0.549 | 0.082 | <u>NKX3-1</u>    |
| 0.541 | 0.063 | <u>ZNF22</u>    | 0.537 | 0.071 | <u>ATG12</u>     |
| 0.512 | 0.034 | <u>SCO2</u>     | 0.510 | 0.046 | <u>LINC00963</u> |
| 0.542 | 0.065 | <u>PATZ1</u>    | 0.531 | 0.069 | <u>NCLN</u>      |
| 0.556 | 0.079 | <u>HMMR</u>     | 0.519 | 0.057 | <u>NRP1</u>      |
| 0.505 | 0.029 | <u>LCMT2</u>    | 0.524 | 0.064 | <u>PROCR</u>     |
| 0.542 | 0.066 | <u>SYNCRIP</u>  | 0.556 | 0.097 | <u>KIAA0485</u>  |
| 0.508 | 0.034 | <u>PWP2</u>     | 0.510 | 0.051 | <u>FBXO5</u>     |
| 0.513 | 0.039 | <u>MTSS1</u>    | 0.512 | 0.056 | <u>PSG9</u>      |
| 0.571 | 0.097 | <u>ZNF85</u>    | 0.513 | 0.058 | <u>TUBA4A</u>    |
| 0.509 | 0.038 | <u>ZNF232</u>   | 0.531 | 0.076 | <u>PIK3R3</u>    |
| 0.540 | 0.069 | <u>ACKR3</u>    | 0.539 | 0.095 | <u>DMXL2</u>     |
| 0.511 | 0.040 | <u>ASB13</u>    | 0.510 | 0.074 | <u>FLRT3</u>     |
| 0.512 | 0.042 | <u>MAGI1</u>    | 0.507 | 0.074 | <u>GATA6</u>     |
| 0.525 | 0.055 | <u>FAM178A</u>  | 0.602 | 0.175 | <u>PTMS</u>      |
| 0.504 | 0.035 | <u>KNOP1</u>    | 0.530 | 0.105 | <u>FIP1L1</u>    |
| 0.508 | 0.040 | <u>NINL</u>     | 0.522 | 0.100 | <u>PIGA</u>      |
| 0.519 | 0.054 | <u>FAM172A</u>  | 0.518 | 0.097 | <u>SFPQ</u>      |
| 0.505 | 0.040 | <u>DUSP7</u>    | 0.530 | 0.117 | <u>PPCDC</u>     |
| 0.509 | 0.045 | <u>METTL8</u>   | 0.530 | 0.117 | <u>RRN3</u>      |
| 0.532 | 0.069 | <u>MAGEF1</u>   | 0.505 | 0.093 | <u>ELF3</u>      |
| 0.530 | 0.066 | <u>NDUFAF4</u>  | 0.507 | 0.095 | <u>FAM46C</u>    |
| 0.502 | 0.040 | <u>SURF1</u>    | 0.516 | 0.105 | <u>PNRC1</u>     |
| 0.508 | 0.046 | <u>MBD4</u>     | 0.529 | 0.125 | <u>KLF10</u>     |
| 0.502 | 0.040 | <u>HK2</u>      | 0.527 | 0.135 | <u>KIAA0232</u>  |
| 0.510 | 0.049 | <u>APEX2</u>    | 0.514 | 0.136 | <u>FOSL1</u>     |
| 0.510 | 0.049 | <u>MGAT1</u>    | 0.511 | 0.192 | <u>BIN1</u>      |
| 0.547 | 0.087 | <u>SFN</u>      |       |       |                  |
| 0.545 | 0.086 | <u>CDC42EP4</u> |       |       |                  |
| 0.512 | 0.053 | <u>ZMYM6</u>    |       |       |                  |
| 0.507 | 0.048 | <u>DHRS1</u>    |       |       |                  |
| 0.560 | 0.102 | <u>NR2C2</u>    |       |       |                  |
| 0.540 | 0.083 | <u>TAF1D</u>    |       |       |                  |
| 0.503 | 0.049 | <u>ZNF544</u>   |       |       |                  |
| 0.502 | 0.051 | <u>APBB2</u>    |       |       |                  |
| 0.516 | 0.066 | <u>FAM111A</u>  |       |       |                  |
| 0.513 | 0.063 | <u>TACC1</u>    |       |       |                  |
| 0.511 | 0.061 | <u>MRPS11</u>   |       |       |                  |
| 0.584 | 0.137 | <u>RRP8</u>     |       |       |                  |
| 0.501 | 0.054 | <u>STK10</u>    |       |       |                  |
| 0.507 | 0.062 | <u>ARMCX1</u>   |       |       |                  |
| 0.513 | 0.069 | <u>UNG</u>      |       |       |                  |
| 0.503 | 0.059 | <u>SPDL1</u>    |       |       |                  |
| 0.503 | 0.059 | <u>FGFR2</u>    |       |       |                  |
| 0.503 | 0.060 | <u>DBP</u>      |       |       |                  |

|       |       |                |
|-------|-------|----------------|
| 0.517 | 0.074 | <u>ZC3H14</u>  |
| 0.511 | 0.071 | <u>ACVR1</u>   |
| 0.512 | 0.072 | <u>PCIF1</u>   |
| 0.502 | 0.066 | <u>CD44</u>    |
| 0.503 | 0.070 | <u>TUBA4A</u>  |
| 0.505 | 0.075 | <u>ATXN1</u>   |
| 0.538 | 0.111 | <u>ARL4C</u>   |
| 0.502 | 0.075 | <u>USP21</u>   |
| 0.502 | 0.077 | <u>FUT4</u>    |
| 0.505 | 0.081 | <u>SMAD3</u>   |
| 0.502 | 0.078 | <u>ATP2A2</u>  |
| 0.502 | 0.079 | <u>ARHGEF3</u> |
| 0.525 | 0.102 | <u>TNNT1</u>   |
| 0.524 | 0.103 | <u>ADRA2C</u>  |
| 0.524 | 0.104 | <u>SEC22A</u>  |
| 0.507 | 0.088 | <u>ZC3H13</u>  |
| 0.524 | 0.106 | <u>C3orf52</u> |
| 0.507 | 0.097 | <u>IMP3</u>    |
| 0.504 | 0.094 | <u>CCNE2</u>   |
| 0.502 | 0.097 | <u>GTF3C2</u>  |
| 0.518 | 0.115 | <u>ALDH1A3</u> |
| 0.512 | 0.115 | <u>PUS3</u>    |
| 0.541 | 0.145 | <u>GTSE1</u>   |
| 0.546 | 0.153 | <u>FAM208B</u> |
| 0.541 | 0.152 | <u>RNF4</u>    |
| 0.507 | 0.118 | <u>PCBP2</u>   |
| 0.506 | 0.126 | <u>ZC3H7B</u>  |
| 0.527 | 0.157 | <u>ANKRD12</u> |
| 0.505 | 0.150 | <u>C2orf42</u> |

### VCAP\_6h based prediction result

| Pa    | Pi    | DownRegulation | Pa    | Pi    | UpRegulation    |
|-------|-------|----------------|-------|-------|-----------------|
| 0.908 | 0.024 | <u>BAG2</u>    | 0.924 | 0.005 | <u>WBP2</u>     |
| 0.909 | 0.030 | <u>POU3F2</u>  | 0.913 | 0.009 | <u>ZFAND1</u>   |
| 0.888 | 0.022 | <u>TRAIP</u>   | 0.897 | 0.004 | <u>NGFRAP1</u>  |
| 0.858 | 0.006 | <u>C6ORF47</u> | 0.879 | 0.023 | <u>CA2</u>      |
| 0.890 | 0.042 | <u>ALMS1</u>   | 0.874 | 0.022 | <u>EMG1</u>     |
| 0.872 | 0.031 | RPL23AP53      | 0.850 | 0.011 | <u>KIAA1324</u> |
| 0.846 | 0.013 | <u>TUT1</u>    | 0.794 | 0.014 | <u>TMEM50A</u>  |
| 0.862 | 0.034 | <u>MRPL24</u>  | 0.825 | 0.048 | <u>GREM1</u>    |
| 0.845 | 0.022 | <u>CAD</u>     | 0.806 | 0.030 | <u>NCAPD3</u>   |
| 0.838 | 0.035 | <u>KLHDC4</u>  | 0.768 | 0.014 | TMEM93          |
| 0.843 | 0.047 | <u>BRE</u>     | 0.761 | 0.050 | <u>MMP3</u>     |
| 0.802 | 0.008 | <u>LIPC</u>    | 0.724 | 0.042 | <u>IRF7</u>     |
| 0.816 | 0.029 | <u>BPIFA1</u>  | 0.727 | 0.067 | <u>IPO13</u>    |

|       |       |          |       |       |          |
|-------|-------|----------|-------|-------|----------|
| 0.829 | 0.056 | CEMP1    | 0.692 | 0.050 | DHX15    |
| 0.813 | 0.047 | CACNA1B  | 0.678 | 0.047 | TUBB2A   |
| 0.789 | 0.033 | DUX1     | 0.703 | 0.074 | INTS7    |
| 0.806 | 0.052 | PCP4     | 0.722 | 0.094 | MMD      |
| 0.787 | 0.041 | CXORF56  | 0.729 | 0.108 | OSTM1    |
| 0.776 | 0.041 | ZNF221   | 0.750 | 0.132 | MCAT     |
| 0.765 | 0.031 | CTSG     | 0.714 | 0.097 | TTC33    |
| 0.733 | 0.007 | C10ORF95 | 0.695 | 0.080 | PRC1     |
| 0.775 | 0.051 | REPS2    | 0.671 | 0.066 | TXN2     |
| 0.737 | 0.016 | KLK7     | 0.699 | 0.104 | MRPL4    |
| 0.724 | 0.015 | AGPAT3   | 0.670 | 0.081 | GMEB2    |
| 0.741 | 0.035 | PCBP4    | 0.629 | 0.044 | TRIM36   |
| 0.773 | 0.069 | PROX1    | 0.649 | 0.066 | BFAR     |
| 0.774 | 0.072 | SELL     | 0.652 | 0.073 | INSIG1   |
| 0.765 | 0.065 | IPCEF1   | 0.655 | 0.077 | IFI6     |
| 0.739 | 0.047 | TBC1D1   | 0.632 | 0.057 | TERF2IP  |
| 0.791 | 0.111 | CRYGD    | 0.643 | 0.077 | UNC50    |
| 0.764 | 0.087 | FRG1     | 0.687 | 0.123 | PRMT1    |
| 0.756 | 0.081 | ROR1     | 0.629 | 0.081 | SPDEF    |
| 0.722 | 0.050 | ALDH1L1  | 0.669 | 0.122 | PSMD7    |
| 0.739 | 0.068 | ELF3     | 0.657 | 0.114 | SLC38A2  |
| 0.701 | 0.031 | AURKA    | 0.640 | 0.098 | ACVR2A   |
| 0.712 | 0.052 | UFSP2    | 0.623 | 0.093 | CENPA    |
| 0.699 | 0.044 | COL4A3BP | 0.567 | 0.053 | GRB7     |
| 0.750 | 0.097 | MGC12488 | 0.604 | 0.097 | NIF3L1   |
| 0.723 | 0.075 | ACSL4    | 0.595 | 0.090 | USP3     |
| 0.717 | 0.074 | SSBP1    | 0.621 | 0.118 | KPNA2    |
| 0.696 | 0.056 | ADD1     | 0.577 | 0.074 | PIK3CA   |
| 0.724 | 0.085 | HLCS     | 0.603 | 0.101 | CCDC91   |
| 0.697 | 0.061 | ST7      | 0.611 | 0.108 | HIST3H2A |
| 0.698 | 0.064 | EPHB2    | 0.562 | 0.063 | LBH      |
| 0.689 | 0.057 | LSM3     | 0.529 | 0.031 | ABCF3    |
| 0.708 | 0.088 | VAMP3    | 0.602 | 0.108 | SGPP1    |
| 0.684 | 0.073 | KCNJ12   | 0.570 | 0.081 | HMGN2    |
| 0.691 | 0.081 | TPBG     | 0.603 | 0.116 | NDE1     |
| 0.709 | 0.103 | PMS2P5   | 0.565 | 0.078 | MCM6     |
| 0.673 | 0.069 | TIPIN    | 0.614 | 0.132 | BABAM1   |
| 0.691 | 0.090 | C10ORF2  | 0.601 | 0.119 | MRPL16   |
| 0.665 | 0.068 | PPP2R2A  | 0.574 | 0.095 | MX1      |
| 0.672 | 0.080 | EYA2     | 0.561 | 0.113 | PNMT     |
| 0.681 | 0.090 | DRG1     | 0.532 | 0.086 | TMSB15A  |
| 0.677 | 0.086 | ZNF587   | 0.551 | 0.109 | ARFIP2   |
| 0.635 | 0.054 | TFCP2L1  | 0.610 | 0.172 | MOSC1    |
| 0.645 | 0.065 | IRX5     | 0.547 | 0.110 | ABHD3    |
| 0.620 | 0.042 | KIF15    | 0.531 | 0.098 | CBR3     |
| 0.664 | 0.087 | NIT2     | 0.557 | 0.125 | IL32     |
| 0.698 | 0.123 | EHBP1    | 0.554 | 0.123 | ALAS1    |

|       |       |                     |       |       |                 |
|-------|-------|---------------------|-------|-------|-----------------|
| 0.636 | 0.061 | <u>LTBP2</u>        | 0.570 | 0.145 | <u>RNF13</u>    |
| 0.681 | 0.107 | <u>ZNF253</u>       | 0.555 | 0.132 | <u>LMO3</u>     |
| 0.660 | 0.087 | <u>SCAMP1</u>       | 0.510 | 0.088 | <u>GNE</u>      |
| 0.683 | 0.115 | <u>KCNS3</u>        | 0.541 | 0.124 | <u>SUN2</u>     |
| 0.637 | 0.079 | <u>PAAF1</u>        | 0.549 | 0.136 | <u>ICT1</u>     |
| 0.644 | 0.088 | <u>POLQ</u>         | 0.541 | 0.132 | <u>PCTP</u>     |
| 0.611 | 0.054 | <u>POLR3D</u>       | 0.570 | 0.169 | <u>COPS7B</u>   |
| 0.627 | 0.072 | <u>CYP26B1</u>      | 0.533 | 0.132 | <u>FAM114A1</u> |
| 0.620 | 0.072 | <u>RRP1</u>         | 0.535 | 0.144 | <u>SLC31A2</u>  |
| 0.656 | 0.108 | <u>KIF13B</u>       | 0.518 | 0.134 | <u>RECQL</u>    |
| 0.655 | 0.108 | <u>EVI2B</u>        | 0.540 | 0.156 | <u>AKAP8L</u>   |
| 0.650 | 0.104 | <u>CLCN2</u>        | 0.535 | 0.152 | <u>ARL6IP4</u>  |
| 0.621 | 0.081 | <u>STEAP1</u>       | 0.554 | 0.174 | <u>CTSK</u>     |
| 0.614 | 0.076 | <u>ROBO4</u>        | 0.526 | 0.154 | <u>RAB32</u>    |
| 0.642 | 0.109 | <u>GFRA2</u>        | 0.514 | 0.147 | <u>OSBPL1A</u>  |
| 0.603 | 0.075 | <u>WNT11</u>        | 0.503 | 0.140 | <u>MEX3C</u>    |
| 0.645 | 0.119 | <u>C20ORF103</u>    | 0.532 | 0.170 | <u>C7ORF68</u>  |
| 0.587 | 0.060 | <u>CDA</u>          | 0.522 | 0.162 | <u>AES</u>      |
| 0.585 | 0.071 | <u>C20ORF46</u>     | 0.513 | 0.155 | <u>MAP1LC3B</u> |
| 0.591 | 0.081 | <u>ZNF552</u>       | 0.507 | 0.151 | <u>KCTD13</u>   |
| 0.657 | 0.155 | <u>AHNAK</u>        | 0.507 | 0.166 | <u>SMARCA5</u>  |
| 0.603 | 0.106 | <u>IKBKB</u>        | 0.527 | 0.198 | <u>SCMH1</u>    |
| 0.572 | 0.076 | <u>HIST1H4B</u>     | 0.503 | 0.188 | <u>MTMR14</u>   |
| 0.606 | 0.111 | <u>DARS</u>         |       |       |                 |
| 0.628 | 0.133 | <u>LOC100508797</u> |       |       |                 |
| 0.582 | 0.093 | <u>PARL</u>         |       |       |                 |
| 0.598 | 0.115 | <u>PDLIM1</u>       |       |       |                 |
| 0.574 | 0.090 | <u>KIAA1109</u>     |       |       |                 |
| 0.594 | 0.116 | <u>FGL1</u>         |       |       |                 |
| 0.562 | 0.084 | <u>KIAA0754</u>     |       |       |                 |
| 0.597 | 0.124 | <u>MAP3K5</u>       |       |       |                 |
| 0.597 | 0.124 | <u>ODF1</u>         |       |       |                 |
| 0.558 | 0.087 | <u>TEAD1</u>        |       |       |                 |
| 0.591 | 0.122 | <u>ERLIN2</u>       |       |       |                 |
| 0.548 | 0.081 | <u>PPFIA1</u>       |       |       |                 |
| 0.568 | 0.104 | <u>CGREF1</u>       |       |       |                 |
| 0.588 | 0.128 | <u>WHSC1</u>        |       |       |                 |
| 0.568 | 0.111 | <u>ZNF516</u>       |       |       |                 |
| 0.605 | 0.149 | <u>SLC25A37</u>     |       |       |                 |
| 0.550 | 0.095 | <u>FMNL1</u>        |       |       |                 |
| 0.589 | 0.137 | <u>C1ORF114</u>     |       |       |                 |
| 0.585 | 0.136 | <u>P2RY13</u>       |       |       |                 |
| 0.562 | 0.113 | <u>ENPP1</u>        |       |       |                 |
| 0.613 | 0.164 | <u>ART3</u>         |       |       |                 |
| 0.596 | 0.148 | <u>C2CD2</u>        |       |       |                 |
| 0.549 | 0.106 | <u>URGCP</u>        |       |       |                 |
| 0.619 | 0.176 | <u>SERPINB7</u>     |       |       |                 |

|       |       |                 |
|-------|-------|-----------------|
| 0.572 | 0.130 | <u>DCUN1D1</u>  |
| 0.561 | 0.122 | LOC644450       |
| 0.552 | 0.115 | <u>DNM1</u>     |
| 0.570 | 0.135 | <u>LHX2</u>     |
| 0.580 | 0.144 | <u>ADM</u>      |
| 0.521 | 0.087 | <u>ITGA2</u>    |
| 0.511 | 0.079 | <u>AMPD2</u>    |
| 0.532 | 0.101 | C14ORF133       |
| 0.508 | 0.078 | <u>DHRS2</u>    |
| 0.541 | 0.111 | <u>NFKB1</u>    |
| 0.597 | 0.168 | <u>PRRC2B</u>   |
| 0.548 | 0.125 | <u>A4GALT</u>   |
| 0.544 | 0.121 | <u>TLR2</u>     |
| 0.570 | 0.148 | <u>ATP13A2</u>  |
| 0.560 | 0.141 | <u>UBE2L3</u>   |
| 0.564 | 0.147 | <u>KNG1</u>     |
| 0.560 | 0.145 | <u>RIN1</u>     |
| 0.502 | 0.093 | <u>BAGE</u>     |
| 0.528 | 0.119 | <u>PPWD1</u>    |
| 0.567 | 0.159 | GTF2H2B         |
| 0.563 | 0.156 | TP53TG5         |
| 0.517 | 0.111 | <u>KIAA0146</u> |
| 0.541 | 0.135 | <u>PTPRG</u>    |
| 0.522 | 0.117 | <u>GALNT11</u>  |
| 0.540 | 0.137 | <u>TLK1</u>     |
| 0.565 | 0.163 | <u>IL2RG</u>    |
| 0.560 | 0.162 | <u>CETP</u>     |
| 0.564 | 0.167 | <u>SEMA5A</u>   |
| 0.547 | 0.151 | <u>DDHD2</u>    |
| 0.520 | 0.126 | PRRG2           |
| 0.523 | 0.131 | <u>FICD</u>     |
| 0.542 | 0.154 | LOC81691        |
| 0.502 | 0.116 | <u>MLF1</u>     |
| 0.511 | 0.125 | <u>CBR1</u>     |
| 0.501 | 0.119 | <u>CRTAM</u>    |
| 0.529 | 0.149 | <u>B4GALNT1</u> |
| 0.521 | 0.147 | <u>HNRPDL</u>   |
| 0.558 | 0.185 | <u>KIAA0513</u> |
| 0.540 | 0.174 | <u>LASP1</u>    |
| 0.531 | 0.167 | ZNF227          |
| 0.511 | 0.148 | <u>RUFY2</u>    |
| 0.518 | 0.156 | <u>KANK2</u>    |
| 0.514 | 0.153 | <u>SERPINI1</u> |
| 0.515 | 0.157 | <u>KPNA5</u>    |
| 0.521 | 0.162 | LOC646934       |
| 0.542 | 0.191 | <u>MAGEA11</u>  |
| 0.524 | 0.174 | <u>CENPC1</u>   |

|       |       |                |
|-------|-------|----------------|
| 0.506 | 0.163 | <u>MUC16</u>   |
| 0.527 | 0.184 | <u>ENC1</u>    |
| 0.507 | 0.164 | <u>NDP</u>     |
| 0.536 | 0.194 | <u>HHAT</u>    |
| 0.502 | 0.161 | <u>UPF2</u>    |
| 0.529 | 0.189 | <u>KCNC2</u>   |
| 0.538 | 0.200 | <u>HLA-DMA</u> |
| 0.502 | 0.178 | <u>WDR44</u>   |
| 0.504 | 0.184 | <u>PIK3CG</u>  |
| 0.502 | 0.185 | <u>TCHH</u>    |
| 0.538 | 0.233 | <u>EBF2</u>    |

### VCAP\_24h based prediction result

| Pa    | Pi    | DownRegulation  | Pa    | Pi    | UpRegulation     |
|-------|-------|-----------------|-------|-------|------------------|
| 0.941 | 0.005 | <u>IFT52</u>    | 0.977 | 0.007 | <u>NPFFR1</u>    |
| 0.941 | 0.010 | <u>UBE2O</u>    | 0.941 | 0.012 | <u>EXTL1</u>     |
| 0.930 | 0.009 | <u>RAD23A</u>   | 0.930 | 0.010 | <u>PRRX1</u>     |
| 0.924 | 0.020 | <u>MRPL49</u>   | 0.933 | 0.016 | <u>SLC12A7</u>   |
| 0.920 | 0.025 | <u>CLASRP</u>   | 0.919 | 0.011 | <u>HIST1H2AJ</u> |
| 0.899 | 0.010 | <u>MLPH</u>     | 0.916 | 0.010 | <u>CEP170</u>    |
| 0.890 | 0.005 | <u>ACTR1B</u>   | 0.916 | 0.013 | <u>PGS1</u>      |
| 0.901 | 0.029 | <u>GCN1L1</u>   | 0.913 | 0.013 | <u>ZNF324</u>    |
| 0.880 | 0.008 | <u>GDI2</u>     | 0.908 | 0.009 | <u>C19ORF60</u>  |
| 0.881 | 0.009 | <u>CLDN1</u>    | 0.907 | 0.009 | <u>C19ORF22</u>  |
| 0.895 | 0.024 | <u>RBMX2</u>    | 0.905 | 0.009 | <u>SNX16</u>     |
| 0.882 | 0.020 | <u>HIF1AN</u>   | 0.907 | 0.013 | <u>ATP2A3</u>    |
| 0.869 | 0.008 | <u>TSPAN1</u>   | 0.915 | 0.022 | <u>OLFM1</u>     |
| 0.883 | 0.024 | <u>ABR</u>      | 0.909 | 0.016 | <u>SND1</u>      |
| 0.875 | 0.019 | <u>C15ORF44</u> | 0.911 | 0.020 | <u>RNF31</u>     |
| 0.884 | 0.031 | <u>ANO1</u>     | 0.904 | 0.015 | <u>CSNK1G3</u>   |
| 0.868 | 0.016 | <u>SYBU</u>     | 0.883 | 0.004 | <u>CIT</u>       |
| 0.854 | 0.014 | <u>GTPBP3</u>   | 0.886 | 0.010 | <u>KLK14</u>     |
| 0.849 | 0.013 | <u>EPB41L2</u>  | 0.894 | 0.018 | <u>NAT6</u>      |
| 0.860 | 0.029 | <u>HPRT1</u>    | 0.895 | 0.022 | <u>HLF</u>       |
| 0.863 | 0.033 | <u>CLASP1</u>   | 0.897 | 0.028 | <u>TBC1D12</u>   |
| 0.837 | 0.012 | <u>NUP43</u>    | 0.878 | 0.010 | <u>PLS3</u>      |
| 0.851 | 0.031 | <u>KAT8</u>     | 0.883 | 0.017 | <u>ITM2B</u>     |
| 0.828 | 0.012 | <u>TSGA10</u>   | 0.874 | 0.008 | <u>ACOT8</u>     |
| 0.847 | 0.034 | <u>RBM7</u>     | 0.887 | 0.027 | <u>DEXI</u>      |
| 0.844 | 0.039 | <u>C16ORF7</u>  | 0.878 | 0.019 | <u>PSENEN</u>    |
| 0.809 | 0.005 | <u>NRN1</u>     | 0.876 | 0.021 | <u>MPDZ</u>      |
| 0.851 | 0.049 | <u>SETD1A</u>   | 0.869 | 0.019 | <u>CARHSP1</u>   |
| 0.850 | 0.051 | <u>PIAS3</u>    | 0.863 | 0.014 | <u>DYNLT1</u>    |
| 0.844 | 0.047 | <u>CEP85</u>    | 0.878 | 0.033 | <u>CORO2B</u>    |
| 0.835 | 0.042 | <u>EIF2B1</u>   | 0.864 | 0.019 | <u>ZRSR2</u>     |
| 0.838 | 0.044 | <u>SLC26A4</u>  | 0.853 | 0.011 | <u>CCNB1</u>     |

|       |       |                 |       |       |                  |
|-------|-------|-----------------|-------|-------|------------------|
| 0.817 | 0.025 | <u>NUP107</u>   | 0.874 | 0.032 | <u>CYR61</u>     |
| 0.799 | 0.010 | <u>EHHADH</u>   | 0.879 | 0.039 | <u>PDK2</u>      |
| 0.811 | 0.022 | <u>IMPACT</u>   | 0.866 | 0.027 | <u>CTNND2</u>    |
| 0.851 | 0.063 | <u>EDEM2</u>    | 0.874 | 0.037 | <u>TOX</u>       |
| 0.831 | 0.043 | <u>P2RY2</u>    | 0.863 | 0.027 | <u>ZNF783</u>    |
| 0.830 | 0.042 | <u>NIPA2</u>    | 0.866 | 0.031 | <u>NCDN</u>      |
| 0.819 | 0.032 | <u>MORF4L2</u>  | 0.843 | 0.009 | <u>KIF18A</u>    |
| 0.818 | 0.032 | <u>ZNF473</u>   | 0.869 | 0.039 | <u>OGN</u>       |
| 0.820 | 0.037 | <u>SHMT2</u>    | 0.850 | 0.022 | <u>PP14571</u>   |
| 0.811 | 0.029 | <u>MRPL15</u>   | 0.856 | 0.029 | <u>PEG3</u>      |
| 0.806 | 0.032 | <u>AIFM1</u>    | 0.841 | 0.016 | <u>FAM179B</u>   |
| 0.790 | 0.017 | <u>AHNAK2</u>   | 0.853 | 0.029 | <u>TRDV3</u>     |
| 0.782 | 0.011 | <u>DAK</u>      | 0.857 | 0.034 | <u>BMP5</u>      |
| 0.829 | 0.059 | <u>KIAA1024</u> | 0.863 | 0.044 | <u>LTK</u>       |
| 0.798 | 0.035 | <u>GDAP1L1</u>  | 0.845 | 0.027 | <u>MFAP2</u>     |
| 0.806 | 0.043 | <u>ARC</u>      | 0.859 | 0.041 | <u>RAB11B</u>    |
| 0.785 | 0.022 | <u>NOC3L</u>    | 0.836 | 0.019 | <u>HIST1H2BI</u> |
| 0.791 | 0.031 | <u>EPRS</u>     | 0.866 | 0.051 | <u>LCK</u>       |
| 0.800 | 0.041 | <u>CGA</u>      | 0.843 | 0.029 | <u>MAPRE3</u>    |
| 0.780 | 0.022 | <u>RWDD2B</u>   | 0.844 | 0.032 | <u>IFT88</u>     |
| 0.791 | 0.033 | <u>ABCA3</u>    | 0.853 | 0.043 | <u>AICDA</u>     |
| 0.800 | 0.043 | <u>CCDC41</u>   | 0.845 | 0.038 | <u>ISG15</u>     |
| 0.785 | 0.034 | <u>ELF3</u>     | 0.833 | 0.026 | <u>PIK3R2</u>    |
| 0.783 | 0.032 | <u>KRT3</u>     | 0.835 | 0.029 | <u>AQP8</u>      |
| 0.793 | 0.043 | <u>SSR3</u>     | 0.821 | 0.016 | <u>PCTP</u>      |
| 0.779 | 0.030 | <u>SDAD1</u>    | 0.828 | 0.025 | <u>JUNB</u>      |
| 0.785 | 0.036 | <u>MAPT</u>     | 0.821 | 0.017 | <u>DBI</u>       |
| 0.791 | 0.047 | <u>PCYOX1L</u>  | 0.813 | 0.010 | <u>CENPF</u>     |
| 0.780 | 0.038 | <u>CS</u>       | 0.832 | 0.033 | <u>CHMP4A</u>    |
| 0.786 | 0.049 | <u>NUBP1</u>    | 0.826 | 0.028 | <u>RSAD2</u>     |
| 0.780 | 0.044 | <u>CKAP5</u>    | 0.830 | 0.033 | <u>OSTF1</u>     |
| 0.773 | 0.038 | <u>IARS</u>     | 0.830 | 0.034 | <u>UBE2D3</u>    |
| 0.771 | 0.037 | <u>IRX5</u>     | 0.811 | 0.015 | <u>TOX3</u>      |
| 0.797 | 0.063 | <u>MAP1LC3C</u> | 0.832 | 0.037 | <u>DGCR2</u>     |
| 0.764 | 0.031 | <u>C16ORF88</u> | 0.818 | 0.024 | <u>SHARPIN</u>   |
| 0.759 | 0.029 | <u>HOXC10</u>   | 0.820 | 0.026 | <u>RGS5</u>      |
| 0.753 | 0.023 | <u>LARS</u>     | 0.840 | 0.049 | <u>DHX40</u>     |
| 0.773 | 0.044 | <u>EIF4H</u>    | 0.816 | 0.026 | <u>CSF2RB</u>    |
| 0.770 | 0.041 | <u>CTCF</u>     | 0.801 | 0.014 | <u>CMAS</u>      |
| 0.752 | 0.024 | <u>ARHGAP4</u>  | 0.822 | 0.035 | <u>SCARF1</u>    |
| 0.765 | 0.037 | <u>ENPP2</u>    | 0.819 | 0.034 | <u>MEST</u>      |
| 0.756 | 0.030 | <u>PFAS</u>     | 0.825 | 0.041 | <u>IFI44L</u>    |
| 0.739 | 0.014 | <u>CLIC3</u>    | 0.824 | 0.039 | <u>CD244</u>     |
| 0.759 | 0.035 | <u>VSNL1</u>    | 0.807 | 0.024 | <u>ANXA2</u>     |
| 0.761 | 0.037 | <u>TMBIM4</u>   | 0.820 | 0.038 | <u>GP1BB</u>     |
| 0.745 | 0.023 | <u>SERPINE2</u> | 0.827 | 0.045 | <u>QPCTL</u>     |
| 0.757 | 0.037 | <u>SCMH1</u>    | 0.791 | 0.010 | <u>ITGAV</u>     |

|       |       |                 |       |       |                  |
|-------|-------|-----------------|-------|-------|------------------|
| 0.846 | 0.127 | <u>NTRK2</u>    | 0.825 | 0.050 | <u>HPS6</u>      |
| 0.755 | 0.036 | <u>SERPINI1</u> | 0.811 | 0.036 | <u>WNK1</u>      |
| 0.782 | 0.067 | <u>IQCE</u>     | 0.807 | 0.033 | <u>BPTF</u>      |
| 0.774 | 0.060 | <u>MGLL</u>     | 0.806 | 0.037 | <u>MT1E</u>      |
| 0.773 | 0.062 | <u>GPN3</u>     | 0.787 | 0.020 | <u>ADM</u>       |
| 0.733 | 0.024 | <u>RAB4A</u>    | 0.795 | 0.029 | <u>MATK</u>      |
| 0.752 | 0.047 | <u>NIF3L1</u>   | 0.810 | 0.045 | <u>NEBL</u>      |
| 0.756 | 0.055 | <u>RPS6</u>     | 0.792 | 0.028 | <u>IRF7</u>      |
| 0.750 | 0.051 | <u>TBKBP1</u>   | 0.797 | 0.033 | <u>FOXC2</u>     |
| 0.736 | 0.037 | <u>SESN1</u>    | 0.779 | 0.017 | <u>CD2AP</u>     |
| 0.738 | 0.039 | <u>DNAJA4</u>   | 0.819 | 0.057 | <u>ADRBK2</u>    |
| 0.759 | 0.061 | <u>RELA</u>     | 0.799 | 0.038 | <u>EGR4</u>      |
| 0.751 | 0.054 | <u>AAGAB</u>    | 0.798 | 0.037 | <u>MAP3K9</u>    |
| 0.731 | 0.035 | <u>DPF1</u>     | 0.769 | 0.010 | <u>TPX2</u>      |
| 0.724 | 0.029 | <u>PFKM</u>     | 0.796 | 0.038 | <u>KIF26B</u>    |
| 0.755 | 0.063 | <u>PIGF</u>     | 0.803 | 0.045 | <u>PTGER1</u>    |
| 0.755 | 0.064 | <u>TCTN3</u>    | 0.805 | 0.047 | <u>POU2F1</u>    |
| 0.754 | 0.065 | <u>ACADS</u>    | 0.801 | 0.043 | <u>PPIB</u>      |
| 0.745 | 0.057 | <u>SH3D21</u>   | 0.800 | 0.046 | <u>CDON</u>      |
| 0.748 | 0.060 | <u>PLEKHB1</u>  | 0.848 | 0.095 | <u>IGFBP2</u>    |
| 0.753 | 0.066 | <u>FAM5C</u>    | 0.796 | 0.045 | <u>B3GAT1</u>    |
| 0.750 | 0.064 | <u>TPD52L2</u>  | 0.798 | 0.047 | <u>PRKG1</u>     |
| 0.746 | 0.060 | <u>WNT5A</u>    | 0.793 | 0.043 | <u>ABCA11P</u>   |
| 0.733 | 0.048 | <u>MAP1S</u>    | 0.794 | 0.045 | <u>NUP50</u>     |
| 0.730 | 0.045 | <u>NLE1</u>     | 0.836 | 0.088 | <u>PDIA3</u>     |
| 0.763 | 0.081 | <u>RIN2</u>     | 0.803 | 0.055 | <u>CYP11B2</u>   |
| 0.742 | 0.061 | <u>EIF2S2</u>   | 0.787 | 0.041 | <u>CFB</u>       |
| 0.725 | 0.049 | <u>FPGS</u>     | 0.770 | 0.024 | <u>CYB561D2</u>  |
| 0.732 | 0.057 | <u>MUC4</u>     | 0.757 | 0.011 | <u>NCAPG</u>     |
| 0.747 | 0.075 | <u>PDHA1</u>    | 0.798 | 0.056 | <u>PEX16</u>     |
| 0.698 | 0.026 | <u>TINF2</u>    | 0.783 | 0.042 | <u>TOLLIP</u>    |
| 0.713 | 0.042 | <u>RPH3AL</u>   | 0.778 | 0.039 | <u>PCDHGA9</u>   |
| 0.695 | 0.025 | <u>PALB2</u>    | 0.791 | 0.052 | <u>SMYD3</u>     |
| 0.720 | 0.051 | <u>COPG</u>     | 0.787 | 0.049 | <u>CHAC1</u>     |
| 0.720 | 0.053 | <u>LACTB2</u>   | 0.781 | 0.043 | <u>C12ORF11</u>  |
| 0.732 | 0.065 | <u>ANXA3</u>    | 0.778 | 0.041 | <u>HIST1H2AI</u> |
| 0.734 | 0.067 | <u>KCTD5</u>    | 0.803 | 0.067 | <u>RAB38</u>     |
| 0.732 | 0.067 | <u>TTF1</u>     | 0.773 | 0.037 | <u>FER</u>       |
| 0.728 | 0.063 | <u>FLOT1</u>    | 0.767 | 0.033 | <u>MKI67</u>     |
| 0.713 | 0.049 | <u>CST3</u>     | 0.786 | 0.052 | <u>ZNF280D</u>   |
| 0.728 | 0.064 | <u>ADCY7</u>    | 0.778 | 0.045 | <u>HAPLN2</u>    |
| 0.728 | 0.065 | <u>CCHCR1</u>   | 0.789 | 0.056 | <u>ARHGEF7</u>   |
| 0.708 | 0.046 | <u>TIMM17B</u>  | 0.781 | 0.048 | <u>CRISPLD2</u>  |
| 0.725 | 0.063 | <u>ASPM</u>     | 0.779 | 0.049 | <u>APOH</u>      |
| 0.706 | 0.045 | <u>VCAM1</u>    | 0.768 | 0.040 | <u>SMC4</u>      |
| 0.723 | 0.063 | <u>RPL13A</u>   | 0.769 | 0.041 | <u>AURKA</u>     |
| 0.743 | 0.083 | <u>SULT1C2</u>  | 0.778 | 0.053 | <u>CNGB1</u>     |

|       |       |                  |       |       |                  |
|-------|-------|------------------|-------|-------|------------------|
| 0.719 | 0.060 | <u>MAK16</u>     | 0.738 | 0.016 | <u>KIF23</u>     |
| 0.710 | 0.051 | <u>SLPI</u>      | 0.764 | 0.043 | <u>SLC35E3</u>   |
| 0.744 | 0.087 | <u>SETD1B</u>    | 0.757 | 0.036 | <u>DPY19L4</u>   |
| 0.736 | 0.079 | <u>SF3A1</u>     | 0.770 | 0.050 | <u>TSC2</u>      |
| 0.719 | 0.063 | <u>UBA52</u>     | 0.748 | 0.028 | <u>SAT1</u>      |
| 0.728 | 0.072 | <u>TMEM180</u>   | 0.776 | 0.058 | <u>SRGAP2</u>    |
| 0.727 | 0.073 | <u>DDX24</u>     | 0.777 | 0.059 | <u>CRB1</u>      |
| 0.686 | 0.033 | <u>IFITM3</u>    | 0.749 | 0.033 | <u>FOS</u>       |
| 0.691 | 0.038 | <u>ALG3</u>      | 0.769 | 0.053 | <u>HELLS</u>     |
| 0.677 | 0.024 | <u>AZI1</u>      | 0.766 | 0.052 | <u>TRPV6</u>     |
| 0.710 | 0.058 | <u>FLNA</u>      | 0.780 | 0.067 | <u>ARVCF</u>     |
| 0.697 | 0.045 | LOC100286895     | 0.756 | 0.043 | <u>HBXIP</u>     |
| 0.698 | 0.047 | <u>C6ORF108</u>  | 0.766 | 0.052 | <u>GP9</u>       |
| 0.701 | 0.050 | <u>PRR7</u>      | 0.763 | 0.050 | <u>APOBEC3B</u>  |
| 0.724 | 0.075 | <u>PASK</u>      | 0.786 | 0.073 | <u>LMO3</u>      |
| 0.730 | 0.083 | <u>CLIC1</u>     | 0.773 | 0.061 | <u>C14ORF132</u> |
| 0.707 | 0.060 | <u>CEACAM6</u>   | 0.746 | 0.035 | <u>C2ORF28</u>   |
| 0.700 | 0.054 | <u>B3GNT1</u>    | 0.770 | 0.059 | <u>ZNF467</u>    |
| 0.720 | 0.074 | <u>SLC6A6</u>    | 0.780 | 0.071 | <u>SLC26A3</u>   |
| 0.739 | 0.094 | <u>DLL3</u>      | 0.746 | 0.037 | <u>FAM69A</u>    |
| 0.719 | 0.076 | <u>FABP3</u>     | 0.756 | 0.047 | <u>CCNA2</u>     |
| 0.697 | 0.054 | <u>SKIV2L2</u>   | 0.787 | 0.080 | <u>SAFB2</u>     |
| 0.715 | 0.075 | <u>FAM125B</u>   | 0.774 | 0.068 | <u>EIF2B2</u>    |
| 0.709 | 0.069 | <u>AIMP1</u>     | 0.765 | 0.059 | <u>ZMPSTE24</u>  |
| 0.715 | 0.076 | <u>PNP</u>       | 0.779 | 0.075 | <u>TAGLN3</u>    |
| 0.696 | 0.057 | <u>PPRC1</u>     | 0.745 | 0.041 | <u>TIPARP</u>    |
| 0.694 | 0.056 | <u>WDR45</u>     | 0.750 | 0.046 | <u>PTBP2</u>     |
| 0.713 | 0.075 | <u>DNASE1L1</u>  | 0.760 | 0.059 | <u>ZBED5</u>     |
| 0.704 | 0.066 | <u>RUNDC3A</u>   | 0.751 | 0.050 | <u>CRYBA2</u>    |
| 0.691 | 0.054 | <u>PRPSAP2</u>   | 0.745 | 0.045 | <u>LPPR1</u>     |
| 0.693 | 0.057 | <u>PARP4</u>     | 0.755 | 0.056 | <u>GLI1</u>      |
| 0.679 | 0.043 | <u>GALNT6</u>    | 0.743 | 0.045 | <u>C14ORF109</u> |
| 0.697 | 0.062 | <u>C20ORF103</u> | 0.742 | 0.044 | <u>PDZD7</u>     |
| 0.702 | 0.067 | <u>LINC00472</u> | 0.756 | 0.059 | <u>UBB</u>       |
| 0.678 | 0.044 | <u>SGPP1</u>     | 0.768 | 0.075 | <u>TGFB2</u>     |
| 0.688 | 0.056 | <u>PDS5A</u>     | 0.764 | 0.074 | LOC100131532     |
| 0.705 | 0.073 | <u>CLDN18</u>    | 0.736 | 0.046 | <u>TARP</u>      |
| 0.678 | 0.046 | <u>POLD2</u>     | 0.744 | 0.055 | <u>VPS53</u>     |
| 0.722 | 0.090 | <u>DSG3</u>      | 0.735 | 0.049 | <u>CCL11</u>     |
| 0.704 | 0.073 | <u>AKR1B10</u>   | 0.769 | 0.084 | <u>KIAA0182</u>  |
| 0.681 | 0.051 | <u>DIXDC1</u>    | 0.741 | 0.057 | <u>POU6F1</u>    |
| 0.693 | 0.066 | <u>MED15</u>     | 0.696 | 0.012 | <u>DLGAP5</u>    |
| 0.695 | 0.070 | <u>RNF187</u>    | 0.748 | 0.065 | <u>DYNC2H1</u>   |
| 0.693 | 0.069 | <u>ABCG1</u>     | 0.767 | 0.088 | <u>MZB1</u>      |
| 0.701 | 0.078 | <u>MRPL16</u>    | 0.746 | 0.068 | <u>SLC13A4</u>   |
| 0.712 | 0.089 | <u>CHMP7</u>     | 0.720 | 0.043 | <u>ICAM2</u>     |
| 0.637 | 0.017 | <u>TRIM17</u>    | 0.728 | 0.051 | <u>RCHY1</u>     |

|       |       |          |       |       |           |
|-------|-------|----------|-------|-------|-----------|
| 0.680 | 0.059 | C20ORF4  | 0.733 | 0.057 | AP3S1     |
| 0.706 | 0.087 | ELANE    | 0.685 | 0.010 | FOXMI     |
| 0.696 | 0.077 | DAZAP2   | 0.728 | 0.053 | SMC5      |
| 0.672 | 0.058 | CD3EAP   | 0.736 | 0.062 | TSSK2     |
| 0.691 | 0.077 | C12ORF41 | 0.735 | 0.061 | DOC2B     |
| 0.690 | 0.076 | SLC7A10  | 0.730 | 0.058 | HCCS      |
| 0.693 | 0.080 | ZNF32    | 0.734 | 0.062 | OAS1      |
| 0.671 | 0.058 | FADS3    | 0.746 | 0.075 | PDE4C     |
| 0.676 | 0.064 | CCNB1IP1 | 0.734 | 0.064 | CTBP2     |
| 0.697 | 0.084 | DDX18    | 0.744 | 0.074 | HIST1H2AB |
| 0.651 | 0.039 | RBM28    | 0.743 | 0.074 | TCN2      |
| 0.672 | 0.061 | ATR      | 0.731 | 0.062 | MARCH6    |
| 0.680 | 0.069 | PLEKHA1  | 0.710 | 0.042 | FAM172A   |
| 0.691 | 0.082 | SMARCC2  | 0.750 | 0.084 | KIAA1310  |
| 0.669 | 0.061 | OXA1L    | 0.742 | 0.077 | DNM2      |
| 0.687 | 0.080 | PKD4     | 0.717 | 0.054 | SLC35D2   |
| 0.663 | 0.056 | PTGES2   | 0.676 | 0.013 | KIFC1     |
| 0.660 | 0.054 | CHKB     | 0.710 | 0.050 | XBP1      |
| 0.689 | 0.084 | TPM4     | 0.700 | 0.043 | SYNJ2BP   |
| 0.672 | 0.068 | ECH1     | 0.720 | 0.062 | MAK       |
| 0.686 | 0.083 | SLC30A3  | 0.684 | 0.028 | RDH14     |
| 0.675 | 0.073 | DNAJC13  | 0.714 | 0.059 | LRP5L     |
| 0.670 | 0.069 | C1ORF61  | 0.713 | 0.058 | TRA2A     |
| 0.678 | 0.078 | U2AF1    | 0.724 | 0.070 | ARL5A     |
| 0.660 | 0.060 | DCK      | 0.729 | 0.075 | HEG1      |
| 0.654 | 0.054 | CHST15   | 0.670 | 0.017 | ASPM      |
| 0.675 | 0.078 | KDM2A    | 0.705 | 0.053 | ROBO1     |
| 0.688 | 0.094 | CUTC     | 0.705 | 0.054 | GSTK1     |
| 0.711 | 0.120 | TIMP4    | 0.720 | 0.069 | RFPL2     |
| 0.668 | 0.077 | BBS7     | 0.722 | 0.071 | ZDHHC17   |
| 0.659 | 0.069 | COPS7A   | 0.703 | 0.054 | ELAVL3    |
| 0.648 | 0.058 | TLR2     | 0.704 | 0.055 | CCDC87    |
| 0.671 | 0.085 | C19ORF42 | 0.681 | 0.033 | DAD1      |
| 0.679 | 0.095 | GNAL     | 0.729 | 0.081 | CTNNA1    |
| 0.633 | 0.049 | TMEM168  | 0.708 | 0.060 | KIAA1797  |
| 0.648 | 0.066 | LARP4    | 0.731 | 0.084 | MED4      |
| 0.661 | 0.079 | TMEM9B   | 0.702 | 0.056 | CHI3L2    |
| 0.643 | 0.062 | GAP43    | 0.684 | 0.037 | KIF20A    |
| 0.632 | 0.052 | PPL      | 0.718 | 0.071 | IGLL3P    |
| 0.646 | 0.067 | POF1B    | 0.705 | 0.058 | COL5A1    |
| 0.657 | 0.078 | SLC5A6   | 0.689 | 0.043 | GALE      |
| 0.623 | 0.044 | PIGB     | 0.705 | 0.059 | TRIM33    |
| 0.632 | 0.054 | CLCN5    | 0.713 | 0.067 | ELL       |
| 0.657 | 0.079 | PDIA4    | 0.714 | 0.069 | PBX2      |
| 0.614 | 0.037 | DCAF17   | 0.716 | 0.072 | CD38      |
| 0.659 | 0.083 | SPINT1   | 0.698 | 0.055 | LHX1      |
| 0.654 | 0.078 | ZHX2     | 0.709 | 0.066 | GPRC5B    |

|       |       |          |       |       |           |
|-------|-------|----------|-------|-------|-----------|
| 0.600 | 0.025 | C22ORF36 | 0.728 | 0.086 | NR4A1     |
| 0.649 | 0.074 | ADAM10   | 0.712 | 0.070 | CPB2      |
| 0.637 | 0.063 | CIDEB    | 0.727 | 0.086 | HS6ST1    |
| 0.656 | 0.082 | COL9A3   | 0.689 | 0.050 | F5        |
| 0.636 | 0.063 | DMRT1    | 0.737 | 0.099 | TREM2     |
| 0.665 | 0.092 | OPHN1    | 0.719 | 0.081 | CLDN5     |
| 0.643 | 0.075 | RPS13    | 0.713 | 0.075 | CYP2A13   |
| 0.639 | 0.072 | PSMD3    | 0.731 | 0.093 | MUC2      |
| 0.649 | 0.081 | UGT2B28  | 0.682 | 0.045 | HIST1H2BC |
| 0.646 | 0.078 | TMBIM6   | 0.715 | 0.078 | LY6G6C    |
| 0.670 | 0.103 | ZNF200   | 0.691 | 0.055 | CORO2A    |
| 0.634 | 0.069 | ABCB4    | 0.705 | 0.070 | MGC12488  |
| 0.640 | 0.076 | INTS3    | 0.707 | 0.073 | ACAP1     |
| 0.644 | 0.082 | MPPE1    | 0.661 | 0.027 | FKBP1B    |
| 0.659 | 0.098 | EIF2D    | 0.734 | 0.100 | KLK5      |
| 0.658 | 0.098 | MUC5AC   | 0.723 | 0.089 | VPS41     |
| 0.618 | 0.058 | SLC41A3  | 0.695 | 0.063 | JTB       |
| 0.664 | 0.106 | UBL4A    | 0.704 | 0.073 | RAI1      |
| 0.656 | 0.098 | PTPN11   | 0.693 | 0.063 | USP32     |
| 0.624 | 0.066 | MTMR11   | 0.719 | 0.088 | SHOX2     |
| 0.632 | 0.080 | RPL27    | 0.695 | 0.065 | ANKRD12   |
| 0.622 | 0.071 | ZNF219   | 0.717 | 0.087 | NCR2      |
| 0.626 | 0.076 | APPL1    | 0.703 | 0.075 | RECQL     |
| 0.636 | 0.087 | RPS29    | 0.711 | 0.085 | ACAD8     |
| 0.608 | 0.058 | PGAM2    | 0.708 | 0.083 | SMAD2     |
| 0.606 | 0.058 | AARS     | 0.683 | 0.058 | COL4A4    |
| 0.631 | 0.083 | DPYSL2   | 0.705 | 0.081 | SUPV3L1   |
| 0.637 | 0.089 | RUVBL1   | 0.703 | 0.080 | PDLIM4    |
| 0.619 | 0.071 | RPL13    | 0.694 | 0.071 | POLR2J4   |
| 0.627 | 0.079 | COL11A1  | 0.676 | 0.055 | DDA1      |
| 0.690 | 0.143 | SH3BP1   | 0.704 | 0.084 | MVK       |
| 0.618 | 0.073 | SCD5     | 0.699 | 0.079 | TMEM212   |
| 0.668 | 0.124 | CTSB     | 0.694 | 0.074 | EN2       |
| 0.630 | 0.089 | SERPINA4 | 0.689 | 0.069 | USP9X     |
| 0.675 | 0.134 | CA10     | 0.706 | 0.087 | TCF20     |
| 0.680 | 0.140 | CYFIP1   | 0.716 | 0.098 | LOC202181 |
| 0.657 | 0.118 | CALML4   | 0.699 | 0.082 | ECE1      |
| 0.598 | 0.061 | BRIX1    | 0.676 | 0.060 | TUFT1     |
| 0.615 | 0.078 | MSL3     | 0.713 | 0.097 | AP2A2     |
| 0.630 | 0.094 | TMCO3    | 0.702 | 0.087 | MS4A1     |
| 0.658 | 0.122 | SLC25A24 | 0.671 | 0.055 | MOGS      |
| 0.606 | 0.071 | NT5DC2   | 0.663 | 0.048 | GTF2B     |
| 0.619 | 0.086 | C2ORF56  | 0.689 | 0.074 | NCAPH2    |
| 0.585 | 0.053 | LPPR3    | 0.708 | 0.092 | SCNN1G    |
| 0.626 | 0.094 | YLP1M1   | 0.674 | 0.060 | ZNF646    |
| 0.584 | 0.052 | DUSP22   | 0.635 | 0.021 | HJURP     |
| 0.616 | 0.084 | CAD      | 0.694 | 0.080 | YOD1      |

|       |       |                 |       |       |                  |
|-------|-------|-----------------|-------|-------|------------------|
| 0.613 | 0.083 | <u>TJP3</u>     | 0.710 | 0.096 | <u>PNLIPRP1</u>  |
| 0.662 | 0.132 | <u>RSRC1</u>    | 0.691 | 0.077 | <u>ETV7</u>      |
| 0.621 | 0.091 | <u>C1ORF183</u> | 0.689 | 0.076 | <u>FBXL8</u>     |
| 0.620 | 0.092 | <u>LAMB3</u>    | 0.690 | 0.078 | <u>LRRC8B</u>    |
| 0.605 | 0.078 | <u>FAM60A</u>   | 0.684 | 0.071 | <u>MARCH5</u>    |
| 0.578 | 0.051 | <u>FOXF2</u>    | 0.687 | 0.075 | <u>TM9SF1</u>    |
| 0.582 | 0.056 | <u>APLNR</u>    | 0.692 | 0.080 | <u>FGF3</u>      |
| 0.619 | 0.094 | <u>VAT1</u>     | 0.678 | 0.067 | <u>SIRT7</u>     |
| 0.637 | 0.114 | <u>DDB2</u>     | 0.666 | 0.056 | <u>SPAG1</u>     |
| 0.607 | 0.084 | <u>COL6A2</u>   | 0.670 | 0.061 | <u>MLXIPL</u>    |
| 0.597 | 0.075 | <u>TRAP1</u>    | 0.681 | 0.073 | <u>ITPR2</u>     |
| 0.617 | 0.096 | <u>DKC1</u>     | 0.690 | 0.082 | <u>PCDHA10</u>   |
| 0.614 | 0.093 | <u>KCNG1</u>    | 0.659 | 0.053 | <u>RBM12B</u>    |
| 0.655 | 0.136 | <u>ALS2CL</u>   | 0.687 | 0.083 | <u>WSCD1</u>     |
| 0.593 | 0.074 | <u>EMD</u>      | 0.699 | 0.094 | <u>TMEM40</u>    |
| 0.638 | 0.120 | <u>ANO3</u>     | 0.681 | 0.078 | <u>EXT2</u>      |
| 0.584 | 0.068 | <u>WDR74</u>    | 0.698 | 0.095 | <u>SYDE1</u>     |
| 0.599 | 0.084 | <u>ARL14</u>    | 0.659 | 0.061 | <u>POLI</u>      |
| 0.598 | 0.084 | <u>GRB10</u>    | 0.674 | 0.076 | <u>EFHC1</u>     |
| 0.619 | 0.105 | <u>ARL1</u>     | 0.698 | 0.101 | <u>OXCT2</u>     |
| 0.646 | 0.131 | <u>AHCTF1</u>   | 0.679 | 0.083 | <u>TAGLN</u>     |
| 0.610 | 0.098 | <u>C7ORF42</u>  | 0.652 | 0.058 | <u>SULT1A2</u>   |
| 0.620 | 0.109 | <u>PAAF1</u>    | 0.687 | 0.093 | <u>ARHGAP22</u>  |
| 0.585 | 0.075 | <u>TCEA2</u>    | 0.674 | 0.082 | <u>DNAJB1</u>    |
| 0.580 | 0.071 | <u>ARHGAP15</u> | 0.634 | 0.043 | <u>NME1</u>      |
| 0.589 | 0.080 | <u>RHOBTB2</u>  | 0.675 | 0.087 | <u>FAM174B</u>   |
| 0.644 | 0.135 | <u>PTGES3</u>   | 0.670 | 0.083 | <u>COLQ</u>      |
| 0.614 | 0.106 | <u>BCL7A</u>    | 0.614 | 0.028 | <u>CNDP2</u>     |
| 0.647 | 0.139 | <u>PIEZO2</u>   | 0.679 | 0.094 | <u>NRIP2</u>     |
| 0.615 | 0.109 | <u>PTPN2</u>    | 0.646 | 0.061 | <u>EIF3L</u>     |
| 0.599 | 0.094 | <u>OPA1</u>     | 0.625 | 0.040 | <u>TUBA1A</u>    |
| 0.587 | 0.082 | <u>PYROXD1</u>  | 0.650 | 0.067 | <u>ZNF573</u>    |
| 0.602 | 0.097 | <u>RSL24D1</u>  | 0.664 | 0.084 | <u>EPS15L1</u>   |
| 0.618 | 0.113 | <u>RPL12</u>    | 0.669 | 0.089 | <u>MCPH1</u>     |
| 0.611 | 0.107 | <u>POLR2D</u>   | 0.657 | 0.077 | <u>CGA</u>       |
| 0.593 | 0.088 | <u>IRAK1</u>    | 0.642 | 0.062 | <u>TMPRSS2</u>   |
| 0.621 | 0.118 | <u>TRIP10</u>   | 0.674 | 0.094 | <u>TBC1D8</u>    |
| 0.600 | 0.097 | <u>ESYT1</u>    | 0.669 | 0.090 | <u>TTC38</u>     |
| 0.624 | 0.122 | <u>RPL22</u>    | 0.678 | 0.100 | <u>TSPYL5</u>    |
| 0.595 | 0.096 | <u>MFF</u>      | 0.668 | 0.090 | <u>CDK20</u>     |
| 0.572 | 0.075 | <u>DMBT1</u>    | 0.653 | 0.076 | <u>NHP2</u>      |
| 0.564 | 0.068 | <u>NUDT3</u>    | 0.677 | 0.101 | <u>HOXA4</u>     |
| 0.588 | 0.092 | <u>HADHB</u>    | 0.633 | 0.057 | <u>GABARAPL1</u> |
| 0.598 | 0.103 | <u>ABCG2</u>    | 0.665 | 0.089 | <u>LOC729799</u> |
| 0.612 | 0.117 | <u>DDX54</u>    | 0.658 | 0.082 | <u>IGF1</u>      |
| 0.596 | 0.103 | <u>TMEM97</u>   | 0.654 | 0.080 | <u>SORL1</u>     |
| 0.603 | 0.110 | <u>GNA12</u>    | 0.659 | 0.086 | <u>TBCB</u>      |

|       |       |                     |       |       |                 |
|-------|-------|---------------------|-------|-------|-----------------|
| 0.636 | 0.143 | <u>BLNK</u>         | 0.616 | 0.043 | <u>ORMDL2</u>   |
| 0.608 | 0.117 | <u>MREG</u>         | 0.671 | 0.098 | <u>SYT12</u>    |
| 0.577 | 0.085 | <u>LINC00341</u>    | 0.675 | 0.103 | <u>CEACAM7</u>  |
| 0.552 | 0.061 | <u>FHL5</u>         | 0.655 | 0.083 | <u>ZNF204P</u>  |
| 0.565 | 0.074 | <u>PRG4</u>         | 0.646 | 0.075 | <u>IRF1</u>     |
| 0.594 | 0.104 | <u>RPL30</u>        | 0.677 | 0.106 | <u>KCNMB2</u>   |
| 0.588 | 0.100 | <u>PLP1</u>         | 0.661 | 0.091 | <u>CARD10</u>   |
| 0.586 | 0.098 | <u>ICAM1</u>        | 0.635 | 0.070 | <u>CCDC19</u>   |
| 0.643 | 0.156 | <u>CD19</u>         | 0.615 | 0.050 | <u>KIF14</u>    |
| 0.611 | 0.124 | <u>FXYD3</u>        | 0.660 | 0.096 | <u>ALLC</u>     |
| 0.588 | 0.102 | <u>PNMA1</u>        | 0.637 | 0.074 | <u>FSTL1</u>    |
| 0.623 | 0.138 | <u>CAPN3</u>        | 0.651 | 0.088 | <u>PIGZ</u>     |
| 0.551 | 0.069 | <u>NSMAF</u>        | 0.619 | 0.057 | <u>C21ORF91</u> |
| 0.605 | 0.123 | <u>GSTM4</u>        | 0.654 | 0.092 | <u>AGAP2</u>    |
| 0.586 | 0.104 | <u>ANPEP</u>        | 0.665 | 0.104 | <u>ZNF33B</u>   |
| 0.601 | 0.120 | <u>RSBN1</u>        | 0.591 | 0.029 | <u>CDC20</u>    |
| 0.613 | 0.132 | <u>UNC119</u>       | 0.645 | 0.084 | <u>SIX5</u>     |
| 0.576 | 0.097 | <u>LOC100129361</u> | 0.650 | 0.089 | <u>C8G</u>      |
| 0.621 | 0.143 | <u>FAM134B</u>      | 0.606 | 0.046 | <u>HOMER2</u>   |
| 0.606 | 0.128 | <u>PTGIR</u>        | 0.658 | 0.098 | <u>MEIS2</u>    |
| 0.578 | 0.102 | <u>RPS24</u>        | 0.665 | 0.106 | <u>PVRIG</u>    |
| 0.587 | 0.111 | <u>RPL23A</u>       | 0.665 | 0.105 | <u>EFR3B</u>    |
| 0.547 | 0.072 | <u>NFX1</u>         | 0.590 | 0.032 | <u>CDCA8</u>    |
| 0.585 | 0.113 | <u>SIM1</u>         | 0.654 | 0.098 | <u>HEXA</u>     |
| 0.578 | 0.107 | <u>NSDHL</u>        | 0.639 | 0.083 | <u>ACPP</u>     |
| 0.607 | 0.135 | <u>CPSF6</u>        | 0.639 | 0.083 | <u>FOXJ1</u>    |
| 0.588 | 0.118 | <u>SLC30A9</u>      | 0.663 | 0.108 | <u>TCEAL2</u>   |
| 0.582 | 0.113 | <u>TNS3</u>         | 0.646 | 0.091 | <u>BTBD18</u>   |
| 0.567 | 0.099 | <u>RPL9</u>         | 0.599 | 0.045 | <u>PLK1</u>     |
| 0.607 | 0.138 | <u>FAM55C</u>       | 0.637 | 0.083 | <u>BRD4</u>     |
| 0.561 | 0.093 | <u>APTX</u>         | 0.654 | 0.100 | <u>ERV3-2</u>   |
| 0.558 | 0.090 | <u>TMEM5</u>        | 0.615 | 0.062 | <u>NID2</u>     |
| 0.586 | 0.118 | <u>PGRMC1</u>       | 0.635 | 0.083 | <u>FCGR2A</u>   |
| 0.560 | 0.093 | <u>ACAT1</u>        | 0.665 | 0.112 | <u>SIX3</u>     |
| 0.607 | 0.141 | <u>EVPL</u>         | 0.640 | 0.088 | <u>AASS</u>     |
| 0.574 | 0.107 | <u>CRADD</u>        | 0.655 | 0.103 | <u>GPR21</u>    |
| 0.562 | 0.095 | <u>PIPOX</u>        | 0.643 | 0.091 | <u>MFNG</u>     |
| 0.596 | 0.130 | <u>DYNC2LI1</u>     | 0.670 | 0.118 | <u>RNF126</u>   |
| 0.554 | 0.088 | <u>POT1</u>         | 0.646 | 0.095 | <u>PKDREJ</u>   |
| 0.567 | 0.101 | <u>CHCHD8</u>       | 0.641 | 0.091 | <u>HSPA4</u>    |
| 0.584 | 0.118 | <u>ARNTL</u>        | 0.641 | 0.091 | <u>REPIN1</u>   |
| 0.563 | 0.098 | <u>CBX7</u>         | 0.651 | 0.102 | <u>TNFRSF17</u> |
| 0.583 | 0.119 | <u>MEIS1</u>        | 0.641 | 0.092 | <u>CHST15</u>   |
| 0.593 | 0.129 | <u>MTMR4</u>        | 0.658 | 0.110 | <u>FABP2</u>    |
| 0.588 | 0.124 | <u>DLG5</u>         | 0.663 | 0.117 | <u>MYBPH</u>    |
| 0.597 | 0.134 | <u>PTMA</u>         | 0.623 | 0.077 | <u>GOLPH3L</u>  |
| 0.560 | 0.097 | <u>ABCA8</u>        | 0.664 | 0.118 | <u>RAB3D</u>    |

|       |       |                 |       |       |                  |
|-------|-------|-----------------|-------|-------|------------------|
| 0.572 | 0.109 | <u>KIAA0922</u> | 0.623 | 0.078 | <u>MMADHC</u>    |
| 0.555 | 0.093 | <u>NOL6</u>     | 0.661 | 0.117 | <u>OR1F1</u>     |
| 0.576 | 0.114 | <u>LAMP1</u>    | 0.650 | 0.106 | <u>CHRNA6</u>    |
| 0.526 | 0.065 | <u>PKP1</u>     | 0.638 | 0.094 | <u>C7ORF58</u>   |
| 0.602 | 0.143 | <u>SLC35C2</u>  | 0.633 | 0.090 | <u>LNPEP</u>     |
| 0.544 | 0.086 | <u>ZNF710</u>   | 0.641 | 0.098 | <u>WDR59</u>     |
| 0.593 | 0.137 | <u>CPSF7</u>    | 0.630 | 0.089 | <u>GADD45G</u>   |
| 0.565 | 0.109 | <u>DUSP8</u>    | 0.637 | 0.096 | <u>CDKN2B</u>    |
| 0.564 | 0.109 | <u>MFN2</u>     | 0.609 | 0.069 | <u>IFI44</u>     |
| 0.580 | 0.126 | <u>M6PR</u>     | 0.660 | 0.121 | <u>OBFC2B</u>    |
| 0.537 | 0.083 | <u>HDAC5</u>    | 0.633 | 0.094 | <u>SRSF7</u>     |
| 0.561 | 0.107 | <u>RNF4</u>     | 0.650 | 0.111 | <u>SRSF4</u>     |
| 0.563 | 0.110 | <u>DNAJB12</u>  | 0.635 | 0.097 | <u>FMOD</u>      |
| 0.593 | 0.141 | <u>SNN</u>      | 0.635 | 0.097 | <u>PLIN2</u>     |
| 0.557 | 0.105 | <u>TFCP2</u>    | 0.632 | 0.095 | <u>SCFD1</u>     |
| 0.589 | 0.138 | <u>LSM3</u>     | 0.632 | 0.095 | <u>SOAT1</u>     |
| 0.513 | 0.062 | <u>AOC2</u>     | 0.645 | 0.108 | <u>PSD</u>       |
| 0.566 | 0.117 | <u>MYO1C</u>    | 0.632 | 0.096 | <u>HLA-DOA</u>   |
| 0.533 | 0.084 | <u>HOXC4</u>    | 0.631 | 0.095 | <u>LINC00115</u> |
| 0.563 | 0.115 | <u>PCTP</u>     | 0.640 | 0.103 | <u>EFNA1</u>     |
| 0.564 | 0.117 | <u>RALGPS1</u>  | 0.623 | 0.086 | <u>RNF111</u>    |
| 0.559 | 0.112 | <u>RGS2</u>     | 0.638 | 0.103 | <u>HIST3H3</u>   |
| 0.548 | 0.102 | <u>NMT1</u>     | 0.635 | 0.100 | <u>MTCH2</u>     |
| 0.556 | 0.110 | <u>RPS9</u>     | 0.659 | 0.124 | <u>GALR3</u>     |
| 0.508 | 0.063 | <u>HOXC11</u>   | 0.650 | 0.116 | <u>LRRC8E</u>    |
| 0.594 | 0.150 | <u>TAC3</u>     | 0.642 | 0.109 | <u>GYG2</u>      |
| 0.545 | 0.101 | <u>FLNB</u>     | 0.651 | 0.119 | <u>CLOCK</u>     |
| 0.559 | 0.115 | <u>RSRC2</u>    | 0.637 | 0.106 | <u>RORC</u>      |
| 0.561 | 0.118 | <u>SLC39A4</u>  | 0.615 | 0.085 | <u>C20ORF46</u>  |
| 0.553 | 0.111 | <u>SUMO3</u>    | 0.619 | 0.090 | <u>LAD1</u>      |
| 0.530 | 0.088 | <u>AKAP3</u>    | 0.614 | 0.085 | <u>POLR2J2</u>   |
| 0.569 | 0.127 | <u>PLEK2</u>    | 0.643 | 0.115 | <u>LGI1</u>      |
| 0.564 | 0.125 | <u>SAR1B</u>    | 0.637 | 0.109 | <u>ARFRP1</u>    |
| 0.573 | 0.135 | <u>ZFAND1</u>   | 0.612 | 0.085 | <u>VNN2</u>      |
| 0.523 | 0.085 | <u>PPP2R5A</u>  | 0.620 | 0.093 | <u>TK1</u>       |
| 0.567 | 0.129 | <u>LINS</u>     | 0.619 | 0.092 | <u>CPEB3</u>     |
| 0.519 | 0.081 | <u>ATG14</u>    | 0.570 | 0.043 | <u>KCMF1</u>     |
| 0.568 | 0.130 | <u>RPLP1</u>    | 0.626 | 0.099 | <u>SLC7A4</u>    |
| 0.548 | 0.111 | <u>RPL23</u>    | 0.656 | 0.131 | <u>KCNK3</u>     |
| 0.524 | 0.088 | <u>ERN2</u>     | 0.636 | 0.111 | <u>FGF16</u>     |
| 0.575 | 0.139 | <u>INPP5F</u>   | 0.640 | 0.117 | <u>OGFR</u>      |
| 0.551 | 0.115 | <u>TRPC4AP</u>  | 0.643 | 0.120 | <u>RABGGTA</u>   |
| 0.527 | 0.093 | <u>RPS3</u>     | 0.599 | 0.076 | <u>ASCC1</u>     |
| 0.572 | 0.138 | <u>CCK</u>      | 0.630 | 0.107 | <u>PTCD3</u>     |
| 0.546 | 0.113 | <u>RAF1</u>     | 0.632 | 0.110 | <u>EBLN2</u>     |
| 0.541 | 0.108 | <u>MYLK</u>     | 0.633 | 0.112 | <u>TEKT2</u>     |
| 0.530 | 0.098 | <u>C22ORF29</u> | 0.598 | 0.077 | <u>DYM</u>       |

|       |       |                 |       |       |                 |
|-------|-------|-----------------|-------|-------|-----------------|
| 0.601 | 0.170 | <u>MYLK3</u>    | 0.616 | 0.095 | <u>MELK</u>     |
| 0.565 | 0.133 | <u>DAG1</u>     | 0.633 | 0.112 | <u>FGFR4</u>    |
| 0.535 | 0.103 | <u>TCL1B</u>    | 0.622 | 0.101 | <u>DCN</u>      |
| 0.551 | 0.120 | <u>FKSG49</u>   | 0.621 | 0.101 | <u>CDX1</u>     |
| 0.521 | 0.091 | <u>JAK1</u>     | 0.621 | 0.102 | <u>CRP</u>      |
| 0.553 | 0.123 | <u>SEL1L3</u>   | 0.637 | 0.117 | <u>HIST1H1D</u> |
| 0.542 | 0.113 | <u>MORC2</u>    | 0.625 | 0.106 | <u>MYH7B</u>    |
| 0.570 | 0.141 | <u>GRSF1</u>    | 0.613 | 0.095 | <u>KRT8P12</u>  |
| 0.536 | 0.110 | <u>ISL1</u>     | 0.599 | 0.080 | <u>NVL</u>      |
| 0.546 | 0.120 | <u>WDR73</u>    | 0.621 | 0.103 | <u>SLC37A1</u>  |
| 0.553 | 0.127 | <u>ABHD2</u>    | 0.639 | 0.121 | <u>NDUFS6</u>   |
| 0.539 | 0.114 | <u>LILRB3</u>   | 0.621 | 0.104 | <u>HTR1B</u>    |
| 0.548 | 0.123 | <u>ITGA10</u>   | 0.629 | 0.112 | <u>CLDN11</u>   |
| 0.541 | 0.116 | <u>NFYB</u>     | 0.608 | 0.092 | <u>PPP2R3C</u>  |
| 0.560 | 0.136 | <u>VWA5A</u>    | 0.639 | 0.124 | <u>LSM14A</u>   |
| 0.547 | 0.123 | <u>STRN3</u>    | 0.614 | 0.099 | <u>FLJ13197</u> |
| 0.535 | 0.111 | <u>KLKB1</u>    | 0.634 | 0.120 | <u>PSMC1</u>    |
| 0.544 | 0.121 | <u>ACADL</u>    | 0.627 | 0.114 | <u>FGF18</u>    |
| 0.568 | 0.146 | <u>PLA2G15</u>  | 0.561 | 0.048 | <u>TCFL5</u>    |
| 0.568 | 0.147 | <u>PIGL</u>     | 0.636 | 0.124 | <u>C22ORF24</u> |
| 0.547 | 0.126 | <u>RPL21</u>    | 0.633 | 0.122 | <u>GCNT2</u>    |
| 0.503 | 0.083 | <u>PLK1</u>     | 0.618 | 0.108 | <u>GPR31</u>    |
| 0.531 | 0.112 | <u>GEMIN4</u>   | 0.582 | 0.072 | <u>CIB1</u>     |
| 0.535 | 0.116 | <u>CYP2B7P1</u> | 0.612 | 0.103 | <u>VPS13B</u>   |
| 0.510 | 0.091 | <u>RRP1</u>     | 0.622 | 0.113 | <u>IST1</u>     |
| 0.563 | 0.144 | <u>WDR26</u>    | 0.604 | 0.095 | <u>SERPIND1</u> |
| 0.569 | 0.152 | <u>UBXN6</u>    | 0.608 | 0.100 | <u>PDE9A</u>    |
| 0.536 | 0.119 | <u>CCNF</u>     | 0.603 | 0.096 | <u>PRSS8</u>    |
| 0.555 | 0.139 | <u>C10ORF95</u> | 0.626 | 0.119 | <u>PLA2G4A</u>  |
| 0.515 | 0.099 | <u>IER3</u>     | 0.621 | 0.114 | <u>ANXA2P3</u>  |
| 0.553 | 0.137 | <u>GABPB1</u>   | 0.590 | 0.084 | <u>SCGB1D2</u>  |
| 0.554 | 0.139 | <u>RPSA</u>     | 0.621 | 0.115 | <u>USP27X</u>   |
| 0.530 | 0.114 | <u>ALDOC</u>    | 0.646 | 0.141 | <u>MRPL22</u>   |
| 0.542 | 0.129 | <u>PGRMC2</u>   | 0.625 | 0.120 | <u>PDLIM2</u>   |
| 0.538 | 0.126 | <u>WFS1</u>     | 0.622 | 0.118 | <u>BMP3</u>     |
| 0.562 | 0.150 | <u>ARPC3</u>    | 0.609 | 0.105 | <u>SMTN</u>     |
| 0.561 | 0.149 | <u>CRYL1</u>    | 0.543 | 0.039 | <u>ATP5I</u>    |
| 0.557 | 0.145 | <u>C12ORF48</u> | 0.595 | 0.091 | <u>KLK3</u>     |
| 0.507 | 0.095 | <u>SMYD5</u>    | 0.583 | 0.083 | <u>CRNN</u>     |
| 0.550 | 0.139 | <u>ZBED1</u>    | 0.616 | 0.116 | <u>DFFA</u>     |
| 0.536 | 0.126 | <u>LIAS</u>     | 0.619 | 0.119 | <u>TAPBPL</u>   |
| 0.520 | 0.110 | <u>BCORL1</u>   | 0.605 | 0.106 | <u>PPIL2</u>    |
| 0.558 | 0.148 | <u>DCLRE1C</u>  | 0.588 | 0.090 | <u>EAF2</u>     |
| 0.539 | 0.129 | <u>SLC22A18</u> | 0.613 | 0.115 | <u>TUB</u>      |
| 0.574 | 0.164 | <u>HNRNPH2</u>  | 0.608 | 0.111 | <u>TTLL5</u>    |
| 0.504 | 0.095 | <u>CEP192</u>   | 0.588 | 0.092 | <u>ASL</u>      |
| 0.546 | 0.137 | <u>RPS12</u>    | 0.607 | 0.112 | <u>GAMT</u>     |

|       |       |                     |       |       |                     |
|-------|-------|---------------------|-------|-------|---------------------|
| 0.529 | 0.121 | <u>C7ORF49</u>      | 0.598 | 0.103 | <u>GOLPH3</u>       |
| 0.521 | 0.113 | <u>KBTBD4</u>       | 0.608 | 0.114 | <u>DZIP1</u>        |
| 0.532 | 0.126 | <u>FAM193A</u>      | 0.608 | 0.115 | <u>TNFSF4</u>       |
| 0.549 | 0.144 | <u>ZNF142</u>       | 0.617 | 0.123 | <u>KLF15</u>        |
| 0.591 | 0.186 | <u>CBY1</u>         | 0.607 | 0.114 | <u>ADAM11</u>       |
| 0.553 | 0.148 | <u>FERMT1</u>       | 0.604 | 0.111 | <u>BICD1</u>        |
| 0.538 | 0.133 | <u>EFNA3</u>        | 0.594 | 0.102 | <u>MBIP</u>         |
| 0.518 | 0.113 | <u>RBM15B</u>       | 0.616 | 0.124 | <u>ZNF221</u>       |
| 0.537 | 0.132 | <u>MAN2B2</u>       | 0.605 | 0.114 | <u>LOC647070</u>    |
| 0.539 | 0.135 | <u>SERHL2</u>       | 0.640 | 0.149 | <u>CLPS</u>         |
| 0.505 | 0.100 | <u>SLC22A4</u>      | 0.526 | 0.035 | <u>CDC25B</u>       |
| 0.541 | 0.138 | <u>HERC2</u>        | 0.629 | 0.138 | <u>CD3G</u>         |
| 0.533 | 0.129 | <u>KIAA0100</u>     | 0.587 | 0.098 | <u>LPHN3</u>        |
| 0.534 | 0.131 | <u>DTWD1</u>        | 0.602 | 0.113 | <u>SPTSSA</u>       |
| 0.544 | 0.142 | <u>RNF220</u>       | 0.596 | 0.108 | <u>ITIH1</u>        |
| 0.536 | 0.133 | <u>ACTA1</u>        | 0.569 | 0.082 | <u>PEX13</u>        |
| 0.531 | 0.129 | <u>PMP22</u>        | 0.621 | 0.134 | <u>TMBIM4</u>       |
| 0.547 | 0.145 | <u>DSN1</u>         | 0.603 | 0.117 | <u>ZNF180</u>       |
| 0.566 | 0.164 | <u>DDX1</u>         | 0.558 | 0.072 | <u>DERL2</u>        |
| 0.560 | 0.159 | <u>MOSPD2</u>       | 0.577 | 0.091 | <u>EFCAB2</u>       |
| 0.530 | 0.130 | <u>FXN</u>          | 0.605 | 0.120 | <u>KHSRP</u>        |
| 0.516 | 0.116 | <u>CTSE</u>         | 0.599 | 0.113 | <u>HESX1</u>        |
| 0.544 | 0.145 | <u>SSB</u>          | 0.612 | 0.127 | <u>IQGAP2</u>       |
| 0.507 | 0.108 | <u>CGRRF1</u>       | 0.614 | 0.130 | <u>MRPL42</u>       |
| 0.527 | 0.128 | <u>SCG5</u>         | 0.594 | 0.111 | <u>TFAP2B</u>       |
| 0.553 | 0.154 | <u>HOXD11</u>       | 0.609 | 0.126 | <u>SCAP</u>         |
| 0.527 | 0.129 | <u>SIX2</u>         | 0.610 | 0.127 | <u>CHRM4</u>        |
| 0.509 | 0.112 | <u>CD96</u>         | 0.606 | 0.123 | <u>SCN3B</u>        |
| 0.549 | 0.154 | <u>AASDHPPT</u>     | 0.601 | 0.119 | <u>CREB3L1</u>      |
| 0.572 | 0.178 | <u>GNL1</u>         | 0.610 | 0.128 | <u>STAG2</u>        |
| 0.514 | 0.121 | <u>SPEG</u>         | 0.575 | 0.094 | <u>FAM178A</u>      |
| 0.531 | 0.137 | <u>CTSL1</u>        | 0.613 | 0.133 | <u>FRMPD1</u>       |
| 0.513 | 0.121 | <u>PTMS</u>         | 0.613 | 0.133 | <u>NDUFAB1</u>      |
| 0.519 | 0.127 | <u>RETSAT</u>       | 0.562 | 0.083 | <u>TMEM121</u>      |
| 0.539 | 0.147 | <u>NFYA</u>         | 0.597 | 0.121 | <u>UBA7</u>         |
| 0.539 | 0.149 | <u>SF3A3</u>        | 0.569 | 0.094 | <u>BBC3</u>         |
| 0.539 | 0.149 | <u>CDK5RAP2</u>     | 0.590 | 0.115 | <u>GAS1</u>         |
| 0.506 | 0.117 | <u>KLHL9</u>        | 0.539 | 0.064 | <u>UGDH</u>         |
| 0.577 | 0.188 | <u>HRASLS</u>       | 0.599 | 0.125 | <u>ACAA2</u>        |
| 0.558 | 0.170 | <u>PPP1R9A</u>      | 0.602 | 0.128 | <u>BSN</u>          |
| 0.576 | 0.189 | <u>LOC100127972</u> | 0.614 | 0.140 | <u>PEX2</u>         |
| 0.552 | 0.165 | <u>MPZ</u>          | 0.607 | 0.133 | <u>MTSS1</u>        |
| 0.523 | 0.138 | <u>AQP3</u>         | 0.608 | 0.135 | <u>ZBED4</u>        |
| 0.560 | 0.175 | <u>DEFB1</u>        | 0.584 | 0.111 | <u>CXXC4</u>        |
| 0.534 | 0.150 | <u>SAFB2</u>        | 0.592 | 0.119 | <u>DTX3</u>         |
| 0.523 | 0.142 | <u>RPL4</u>         | 0.578 | 0.106 | <u>TMEM66</u>       |
| 0.506 | 0.125 | <u>TMEM33</u>       | 0.602 | 0.131 | <u>LOC100508797</u> |

|       |       |          |       |       |           |
|-------|-------|----------|-------|-------|-----------|
| 0.561 | 0.180 | C2ORF44  | 0.566 | 0.094 | APRT      |
| 0.510 | 0.129 | H2BFS    | 0.592 | 0.120 | MAGI1     |
| 0.519 | 0.140 | EEF1G    | 0.604 | 0.133 | C9ORF167  |
| 0.519 | 0.140 | C4BPB    | 0.593 | 0.121 | YES1      |
| 0.527 | 0.149 | EEF1A1   | 0.580 | 0.109 | SPHK1     |
| 0.501 | 0.122 | CETP     | 0.539 | 0.068 | NRIP1     |
| 0.504 | 0.126 | RABL3    | 0.579 | 0.108 | VPS35     |
| 0.523 | 0.145 | DLG1     | 0.578 | 0.107 | GBP1      |
| 0.545 | 0.167 | GJB1     | 0.608 | 0.137 | FBN1      |
| 0.545 | 0.168 | STAT5B   | 0.614 | 0.145 | IL11      |
| 0.561 | 0.187 | E4F1     | 0.599 | 0.131 | TPO       |
| 0.515 | 0.141 | CRTAP    | 0.573 | 0.105 | KIAA0196  |
| 0.529 | 0.155 | PSMC3IP  | 0.587 | 0.120 | PROSC     |
| 0.517 | 0.147 | UBE2D2   | 0.587 | 0.120 | MKRN2     |
| 0.503 | 0.134 | SLC33A1  | 0.539 | 0.075 | CRELD2    |
| 0.538 | 0.169 | TFF2     | 0.574 | 0.110 | FANCI     |
| 0.565 | 0.196 | RHBG     | 0.540 | 0.076 | CTDSP1    |
| 0.513 | 0.145 | MOB3B    | 0.594 | 0.131 | CWF19L1   |
| 0.503 | 0.136 | GSN      | 0.579 | 0.116 | PHTF1     |
| 0.509 | 0.143 | WDR61    | 0.569 | 0.106 | HIST1H2AM |
| 0.527 | 0.162 | RPL34    | 0.578 | 0.116 | DYSF      |
| 0.518 | 0.153 | RPS2     | 0.564 | 0.103 | PITX3     |
| 0.502 | 0.137 | ZNF358   | 0.571 | 0.111 | LSM14B    |
| 0.504 | 0.139 | FAIM2    | 0.599 | 0.139 | TM4SF5    |
| 0.521 | 0.156 | FUCA1    | 0.556 | 0.097 | HELZ      |
| 0.505 | 0.143 | PPIP5K1  | 0.541 | 0.082 | PLP2      |
| 0.529 | 0.167 | RASSF4   | 0.561 | 0.103 | LHFPL2    |
| 0.514 | 0.153 | PSMD1    | 0.583 | 0.125 | SMARCA1   |
| 0.522 | 0.161 | CAND1    | 0.572 | 0.114 | CLDN8     |
| 0.522 | 0.162 | TBL1XR1  | 0.608 | 0.151 | HMGB2     |
| 0.530 | 0.171 | PHF16    | 0.567 | 0.110 | TM9SF3    |
| 0.505 | 0.148 | DKK4     | 0.537 | 0.080 | TCF15     |
| 0.501 | 0.146 | CHERP    | 0.552 | 0.095 | PSMA6     |
| 0.542 | 0.188 | SMEK2    | 0.580 | 0.124 | HIST1H4B  |
| 0.529 | 0.176 | DCUN1D2  | 0.586 | 0.130 | ZNF93     |
| 0.524 | 0.171 | AQP5     | 0.568 | 0.113 | AMPD3     |
| 0.531 | 0.180 | ERC2     | 0.579 | 0.124 | FOXD2     |
| 0.503 | 0.152 | ZKSCAN5  | 0.601 | 0.146 | LRRC68    |
| 0.531 | 0.181 | CD7      | 0.570 | 0.116 | NKX3-1    |
| 0.506 | 0.156 | SNUPN    | 0.591 | 0.137 | LIFR      |
| 0.501 | 0.153 | RPLP0    | 0.575 | 0.121 | TNFRSF13B |
| 0.514 | 0.169 | GPBP1L1  | 0.566 | 0.114 | RNF138    |
| 0.505 | 0.161 | UQCC     | 0.571 | 0.120 | HEATR8    |
| 0.501 | 0.158 | TGIF1    | 0.572 | 0.121 | HDAC6     |
| 0.507 | 0.165 | HSP90AB1 | 0.557 | 0.107 | FUT7      |
| 0.514 | 0.174 | RUNX3    | 0.564 | 0.114 | LENEP     |
| 0.516 | 0.177 | DIO1     | 0.558 | 0.108 | ALDH1A3   |

|       |       |                 |       |       |                |
|-------|-------|-----------------|-------|-------|----------------|
| 0.507 | 0.169 | <u>MRAS</u>     | 0.548 | 0.099 | <u>RANBP6</u>  |
| 0.505 | 0.167 | <u>RPS4X</u>    | 0.572 | 0.124 | <u>EDN2</u>    |
| 0.503 | 0.169 | LOC100507009    | 0.581 | 0.133 | <u>RGS3</u>    |
| 0.513 | 0.180 | <u>EPB49</u>    | 0.551 | 0.103 | <u>RPL13P5</u> |
| 0.510 | 0.177 | <u>CPNE7</u>    | 0.580 | 0.132 | <u>PCDHGA1</u> |
| 0.538 | 0.208 | <u>PHLDA3</u>   | 0.570 | 0.123 | <u>SLC4A2</u>  |
| 0.516 | 0.189 | <u>HR</u>       | 0.580 | 0.134 | <u>RGS11</u>   |
| 0.505 | 0.187 | <u>DNASE1L2</u> | 0.541 | 0.096 | <u>PTTG3P</u>  |
| 0.508 | 0.191 | PKD1P1          | 0.575 | 0.130 | <u>KDM6B</u>   |
| 0.520 | 0.204 | <u>CRYAB</u>    | 0.554 | 0.108 | <u>IFIT1</u>   |
| 0.505 | 0.198 | <u>MARCH8</u>   | 0.538 | 0.093 | <u>RRAGA</u>   |
| 0.504 | 0.237 | <u>GATA4</u>    | 0.579 | 0.134 | <u>SLC28A2</u> |
|       |       |                 | 0.571 | 0.128 | <u>CEACAM1</u> |
|       |       |                 | 0.580 | 0.137 | <u>SAA3P</u>   |
|       |       |                 | 0.570 | 0.128 | <u>ADAM20</u>  |
|       |       |                 | 0.555 | 0.113 | <u>YIF1B</u>   |
|       |       |                 | 0.591 | 0.150 | <u>ATF2</u>    |
|       |       |                 | 0.573 | 0.132 | <u>SPTBN5</u>  |
|       |       |                 | 0.513 | 0.073 | <u>RND1</u>    |
|       |       |                 | 0.587 | 0.148 | <u>MUC3A</u>   |
|       |       |                 | 0.572 | 0.134 | ZNF226         |
|       |       |                 | 0.565 | 0.128 | <u>TRMT12</u>  |
|       |       |                 | 0.558 | 0.122 | <u>CPNE3</u>   |
|       |       |                 | 0.578 | 0.143 | ZNF277         |
|       |       |                 | 0.547 | 0.113 | <u>ERG</u>     |
|       |       |                 | 0.565 | 0.130 | C7ORF54        |
|       |       |                 | 0.543 | 0.109 | <u>NKTR</u>    |
|       |       |                 | 0.573 | 0.138 | <u>MINPP1</u>  |
|       |       |                 | 0.571 | 0.137 | <u>FKSG2</u>   |
|       |       |                 | 0.566 | 0.132 | <u>GJB4</u>    |
|       |       |                 | 0.567 | 0.134 | <u>PRLH</u>    |
|       |       |                 | 0.576 | 0.143 | <u>TROVE2</u>  |
|       |       |                 | 0.530 | 0.097 | <u>SCAMP3</u>  |
|       |       |                 | 0.554 | 0.122 | <u>TTC23</u>   |
|       |       |                 | 0.584 | 0.152 | <u>CELA3B</u>  |
|       |       |                 | 0.547 | 0.116 | <u>THRAP3</u>  |
|       |       |                 | 0.553 | 0.122 | <u>ALPI</u>    |
|       |       |                 | 0.552 | 0.121 | <u>CELP</u>    |
|       |       |                 | 0.518 | 0.088 | <u>LCN2</u>    |
|       |       |                 | 0.530 | 0.100 | ZNF268         |
|       |       |                 | 0.563 | 0.133 | <u>CASP6</u>   |
|       |       |                 | 0.573 | 0.143 | GNG13          |
|       |       |                 | 0.555 | 0.125 | <u>DENND4A</u> |
|       |       |                 | 0.556 | 0.127 | <u>STAP1</u>   |
|       |       |                 | 0.589 | 0.160 | <u>MRPS15</u>  |
|       |       |                 | 0.544 | 0.117 | <u>PAF1</u>    |
|       |       |                 | 0.552 | 0.125 | <u>NELL2</u>   |

|  |       |       |                 |
|--|-------|-------|-----------------|
|  | 0.547 | 0.120 | <u>FZD5</u>     |
|  | 0.561 | 0.136 | <u>INPP4A</u>   |
|  | 0.560 | 0.134 | <u>C22ORF29</u> |
|  | 0.557 | 0.132 | <u>IL17RA</u>   |
|  | 0.559 | 0.134 | <u>IQCA1</u>    |
|  | 0.556 | 0.132 | <u>MMP11</u>    |
|  | 0.562 | 0.139 | <u>APOL3</u>    |
|  | 0.530 | 0.107 | <u>SPTBN4</u>   |
|  | 0.575 | 0.152 | <u>C1ORF106</u> |
|  | 0.547 | 0.125 | <u>IL1RAPL1</u> |
|  | 0.558 | 0.136 | <u>CEACAM4</u>  |
|  | 0.542 | 0.120 | <u>MBOAT2</u>   |
|  | 0.523 | 0.102 | <u>EIF3D</u>    |
|  | 0.548 | 0.128 | <u>TSPAN1</u>   |
|  | 0.556 | 0.135 | <u>HOXB1</u>    |
|  | 0.549 | 0.128 | <u>SLC25A16</u> |
|  | 0.563 | 0.145 | <u>CGGBP1</u>   |
|  | 0.565 | 0.147 | <u>SCAPER</u>   |
|  | 0.508 | 0.090 | <u>SDCBP</u>    |
|  | 0.563 | 0.147 | <u>AHSG</u>     |
|  | 0.552 | 0.137 | <u>CLSTN3</u>   |
|  | 0.535 | 0.120 | ARHGAP33        |
|  | 0.544 | 0.130 | <u>SEMA3F</u>   |
|  | 0.545 | 0.131 | <u>LAP3</u>     |
|  | 0.537 | 0.123 | GRRP1           |
|  | 0.549 | 0.135 | <u>UBXN1</u>    |
|  | 0.563 | 0.150 | <u>ATP9B</u>    |
|  | 0.534 | 0.121 | <u>BTN3A3</u>   |
|  | 0.556 | 0.143 | CETN1           |
|  | 0.555 | 0.144 | <u>GCH1</u>     |
|  | 0.574 | 0.163 | <u>SNRPB2</u>   |
|  | 0.542 | 0.131 | <u>GAS2L1</u>   |
|  | 0.552 | 0.142 | <u>PRKAR1A</u>  |
|  | 0.554 | 0.145 | <u>FAM153A</u>  |
|  | 0.549 | 0.141 | <u>C1ORF174</u> |
|  | 0.544 | 0.135 | <u>ATP10B</u>   |
|  | 0.517 | 0.109 | <u>CXCL13</u>   |
|  | 0.547 | 0.140 | <u>NDUFB8</u>   |
|  | 0.546 | 0.139 | <u>CLDN15</u>   |
|  | 0.547 | 0.140 | <u>SPPL2B</u>   |
|  | 0.559 | 0.153 | <u>ACOX2</u>    |
|  | 0.561 | 0.154 | <u>NOD1</u>     |
|  | 0.546 | 0.141 | KLRAP1          |
|  | 0.554 | 0.148 | <u>MASP2</u>    |
|  | 0.557 | 0.152 | <u>PBXIP1</u>   |
|  | 0.542 | 0.138 | <u>AFF4</u>     |
|  | 0.518 | 0.114 | <u>CERK</u>     |

|  |       |       |                 |
|--|-------|-------|-----------------|
|  | 0.538 | 0.135 | <u>PIAS3</u>    |
|  | 0.553 | 0.150 | <u>PLXNA2</u>   |
|  | 0.535 | 0.132 | <u>FAM171A1</u> |
|  | 0.549 | 0.146 | <u>CISH</u>     |
|  | 0.538 | 0.135 | <u>TOP3B</u>    |
|  | 0.527 | 0.125 | <u>SEPT8</u>    |
|  | 0.525 | 0.123 | <u>GIMAP6</u>   |
|  | 0.514 | 0.114 | <u>CSNK2A2</u>  |
|  | 0.556 | 0.156 | <u>ADAM7</u>    |
|  | 0.539 | 0.139 | <u>LGR5</u>     |
|  | 0.537 | 0.138 | <u>CLDN9</u>    |
|  | 0.534 | 0.134 | <u>IFITM1</u>   |
|  | 0.562 | 0.162 | <u>H2AFZ</u>    |
|  | 0.509 | 0.109 | <u>USP47</u>    |
|  | 0.549 | 0.150 | <u>OCM2</u>     |
|  | 0.536 | 0.138 | <u>SYNJ2</u>    |
|  | 0.509 | 0.111 | <u>PCP4</u>     |
|  | 0.555 | 0.157 | <u>PLAC8</u>    |
|  | 0.546 | 0.150 | <u>SGSH</u>     |
|  | 0.548 | 0.152 | <u>PFDN1</u>    |
|  | 0.554 | 0.158 | <u>LSM2</u>     |
|  | 0.523 | 0.128 | <u>C3ORF64</u>  |
|  | 0.526 | 0.131 | <u>NFKB2</u>    |
|  | 0.526 | 0.132 | <u>ADPGK</u>    |
|  | 0.523 | 0.129 | <u>HIST1H1T</u> |
|  | 0.543 | 0.150 | <u>SEC24D</u>   |
|  | 0.531 | 0.138 | <u>CTIF</u>     |
|  | 0.531 | 0.138 | <u>SCNN1A</u>   |
|  | 0.504 | 0.111 | <u>CKS2</u>     |
|  | 0.535 | 0.143 | <u>CDK18</u>    |
|  | 0.544 | 0.152 | <u>NEUROG3</u>  |
|  | 0.542 | 0.152 | <u>FAM198B</u>  |
|  | 0.513 | 0.124 | <u>TRIM36</u>   |
|  | 0.515 | 0.126 | <u>FAM168B</u>  |
|  | 0.537 | 0.148 | <u>NT5C</u>     |
|  | 0.551 | 0.164 | <u>OBSL1</u>    |
|  | 0.522 | 0.135 | <u>F10</u>      |
|  | 0.525 | 0.138 | <u>ATAD5</u>    |
|  | 0.541 | 0.156 | <u>METTL10</u>  |
|  | 0.530 | 0.146 | <u>PAK7</u>     |
|  | 0.526 | 0.142 | <u>LANCL1</u>   |
|  | 0.538 | 0.156 | <u>GPR161</u>   |
|  | 0.521 | 0.139 | <u>RPRD1A</u>   |
|  | 0.532 | 0.150 | <u>MLPH</u>     |
|  | 0.519 | 0.137 | <u>MAPK8</u>    |
|  | 0.529 | 0.148 | <u>MAPK4</u>    |
|  | 0.534 | 0.153 | <u>FAM125B</u>  |

|  |       |       |                 |
|--|-------|-------|-----------------|
|  | 0.536 | 0.157 | <u>SF3B5</u>    |
|  | 0.544 | 0.166 | <u>ECM1</u>     |
|  | 0.522 | 0.144 | <u>PKN2</u>     |
|  | 0.528 | 0.150 | <u>HRH3</u>     |
|  | 0.546 | 0.168 | <u>HOXA3</u>    |
|  | 0.530 | 0.152 | <u>ADH1C</u>    |
|  | 0.510 | 0.133 | <u>PCNX</u>     |
|  | 0.527 | 0.150 | <u>DBF4B</u>    |
|  | 0.519 | 0.142 | <u>IGH@</u>     |
|  | 0.517 | 0.141 | <u>GHRHR</u>    |
|  | 0.510 | 0.133 | <u>POLR2K</u>   |
|  | 0.540 | 0.164 | <u>GALNT8</u>   |
|  | 0.534 | 0.158 | <u>ACE</u>      |
|  | 0.523 | 0.148 | <u>ABL2</u>     |
|  | 0.530 | 0.156 | <u>POMC</u>     |
|  | 0.534 | 0.159 | <u>RBM41</u>    |
|  | 0.524 | 0.150 | <u>ZNF282</u>   |
|  | 0.530 | 0.156 | <u>FZD6</u>     |
|  | 0.505 | 0.132 | <u>CCDC70</u>   |
|  | 0.535 | 0.162 | <u>MEP1A</u>    |
|  | 0.535 | 0.162 | <u>SULF1</u>    |
|  | 0.512 | 0.139 | <u>TAF4B</u>    |
|  | 0.523 | 0.151 | <u>PTPRN2</u>   |
|  | 0.516 | 0.144 | <u>ATOH1</u>    |
|  | 0.541 | 0.169 | <u>HOXB5</u>    |
|  | 0.525 | 0.154 | <u>TTLL3</u>    |
|  | 0.524 | 0.154 | <u>CLDN3</u>    |
|  | 0.528 | 0.159 | <u>RRAS2</u>    |
|  | 0.523 | 0.154 | <u>KIR2DL4</u>  |
|  | 0.503 | 0.138 | <u>RRP8</u>     |
|  | 0.524 | 0.160 | <u>ARHGEF4</u>  |
|  | 0.524 | 0.160 | <u>ZNF606</u>   |
|  | 0.521 | 0.159 | <u>RIC3</u>     |
|  | 0.515 | 0.153 | <u>PAX5</u>     |
|  | 0.507 | 0.145 | <u>S100BPB</u>  |
|  | 0.529 | 0.168 | <u>SPAG9</u>    |
|  | 0.507 | 0.146 | <u>PPP1R13B</u> |
|  | 0.518 | 0.157 | <u>GPN2</u>     |
|  | 0.506 | 0.145 | <u>CCDC134</u>  |
|  | 0.522 | 0.162 | <u>PLEKHM1</u>  |
|  | 0.521 | 0.161 | <u>TANK</u>     |
|  | 0.541 | 0.181 | <u>LIMCH1</u>   |
|  | 0.509 | 0.150 | <u>UBE2A</u>    |
|  | 0.519 | 0.160 | <u>RASGRP2</u>  |
|  | 0.517 | 0.158 | <u>SSX5</u>     |
|  | 0.507 | 0.148 | <u>GPR97</u>    |
|  | 0.511 | 0.153 | <u>EPM2A</u>    |

|  |       |       |                 |
|--|-------|-------|-----------------|
|  | 0.504 | 0.147 | <u>SRRM1</u>    |
|  | 0.525 | 0.168 | <u>FLT1</u>     |
|  | 0.503 | 0.146 | <u>NOTCH2</u>   |
|  | 0.514 | 0.157 | <u>NEU3</u>     |
|  | 0.514 | 0.157 | <u>CEP112</u>   |
|  | 0.533 | 0.176 | <u>HMGN3</u>    |
|  | 0.516 | 0.161 | AMELY           |
|  | 0.515 | 0.160 | CA5B            |
|  | 0.518 | 0.165 | <u>SLC22A6</u>  |
|  | 0.529 | 0.176 | <u>MTRR</u>     |
|  | 0.503 | 0.149 | <u>CNR1</u>     |
|  | 0.512 | 0.160 | <u>CWH43</u>    |
|  | 0.513 | 0.163 | <u>BUB1</u>     |
|  | 0.507 | 0.157 | <u>RIMBP2</u>   |
|  | 0.505 | 0.156 | <u>GNRH2</u>    |
|  | 0.513 | 0.164 | KIAA0894        |
|  | 0.504 | 0.157 | <u>CCDC71</u>   |
|  | 0.515 | 0.169 | <u>UBR2</u>     |
|  | 0.504 | 0.158 | ZNF287          |
|  | 0.519 | 0.174 | <u>ACTL7A</u>   |
|  | 0.504 | 0.160 | <u>LHB</u>      |
|  | 0.509 | 0.165 | <u>ADAMTS12</u> |
|  | 0.509 | 0.165 | <u>ZER1</u>     |
|  | 0.513 | 0.171 | <u>OFD1</u>     |
|  | 0.514 | 0.174 | <u>SYN2</u>     |
|  | 0.516 | 0.179 | <u>MCMBP</u>    |
|  | 0.504 | 0.167 | <u>TMEM147</u>  |
|  | 0.501 | 0.165 | <u>FGF23</u>    |
|  | 0.508 | 0.172 | <u>SLC26A2</u>  |
|  | 0.514 | 0.180 | <u>UBN1</u>     |
|  | 0.509 | 0.176 | C8ORF60         |
|  | 0.507 | 0.175 | <u>PHF20</u>    |
|  | 0.501 | 0.171 | <u>SH3BGRL3</u> |
|  | 0.502 | 0.172 | <u>EIF2C2</u>   |
|  | 0.506 | 0.176 | ACSM1           |
|  | 0.503 | 0.174 | <u>HPCAL1</u>   |
|  | 0.507 | 0.178 | <u>CLINT1</u>   |
|  | 0.502 | 0.174 | CCDC40          |
|  | 0.504 | 0.176 | <u>IFT27</u>    |
|  | 0.506 | 0.183 | <u>SLC6A7</u>   |
|  | 0.506 | 0.182 | GIPR            |
|  | 0.501 | 0.184 | <u>ELAVL4</u>   |

## Combination prediction result

| <u>Name</u>     | <u>Overlap count</u> | <u>Up</u> | <u>Down</u> | <u>Result</u> |
|-----------------|----------------------|-----------|-------------|---------------|
| <u>PTPN2</u>    | 6                    | 3         | 3           |               |
| <u>AURKA</u>    | 5                    | 2         | 3           |               |
| <u>CCNO</u>     | 5                    | 3         | 2           |               |
| <u>CEP57</u>    | 5                    | 2         | 3           |               |
| <u>EAF2</u>     | 5                    | 2         | 3           |               |
| <u>KIAA0753</u> | 5                    | 2         | 3           |               |
| <u>OPA1</u>     | 5                    | 2         | 3           |               |
| <u>PLEC</u>     | 5                    | 1         | 4           |               |
| <u>RBM23</u>    | 5                    | 3         | 2           |               |
| <u>SPHK1</u>    | 5                    | 2         | 3           |               |
| <u>SREK1</u>    | 5                    | 2         | 3           |               |
| <u>TMPRSS2</u>  | 5                    | 4         | 1           |               |
| <u>TNFRSF1A</u> | 5                    | 3         | 2           |               |
| <u>TUBA4A</u>   | 5                    | 3         | 2           |               |
| <u>ZNF277</u>   | 5                    | 3         | 2           |               |
| <u>ZNF32</u>    | 5                    | 2         | 3           |               |
| <u>ZNF45</u>    | 5                    | 2         | 3           |               |
| <u>ADM</u>      | 4                    | 3         | 1           |               |
| <u>AKAP8</u>    | 4                    | 1         | 3           |               |
| <u>ALKBH1</u>   | 4                    | 2         | 2           |               |
| <u>ANKRD12</u>  | 4                    | 3         | 1           |               |
| <u>APPL1</u>    | 4                    | 1         | 3           |               |
| <u>ARMC8</u>    | 4                    | 2         | 2           |               |
| <u>ARMCX5</u>   | 4                    | 1         | 3           |               |
| <u>ARNT2</u>    | 4                    | 1         | 3           |               |
| <u>ASPH</u>     | 4                    | 2         | 2           |               |
| <u>ATG5</u>     | 4                    | 2         | 2           |               |
| <u>BCL7C</u>    | 4                    | 2         | 2           |               |
| <u>BCLAF1</u>   | 4                    | 2         | 2           |               |
| <u>BNIP1</u>    | 4                    | 1         | 3           |               |
| <u>CBR3</u>     | 4                    | 3         | 1           |               |
| <u>CCL2</u>     | 4                    | 2         | 2           |               |
| <u>CD22</u>     | 4                    | 2         | 2           |               |
| <u>CDCA4</u>    | 4                    | 2         | 2           |               |
| <u>CDT1</u>     | 4                    | 3         | 1           |               |
| <u>CHST15</u>   | 4                    | 1         | 3           |               |
| <u>COQ9</u>     | 4                    | 2         | 2           |               |
| <u>CTSB</u>     | 4                    | 2         | 2           |               |
| <u>DCAF17</u>   | 4                    | 2         | 2           |               |
| <u>DERL2</u>    | 4                    | 2         | 2           |               |
| <u>DHX40</u>    | 4                    | 2         | 2           |               |
| <u>DNAJB12</u>  | 4                    | 2         | 2           |               |
| <u>DNAJC10</u>  | 4                    | 1         | 3           |               |
| <u>DOCK4</u>    | 4                    | 1         | 3           |               |
| <u>EEF1B2</u>   | 4                    | 2         | 2           |               |

|                   |   |   |   |  |
|-------------------|---|---|---|--|
| <u>EFNA3</u>      | 4 | 1 | 3 |  |
| <u>EHD1</u>       | 4 | 3 | 1 |  |
| <u>EIF2B2</u>     | 4 | 3 | 1 |  |
| <u>EIF5B</u>      | 4 | 1 | 3 |  |
| <u>FDXR</u>       | 4 | 3 | 1 |  |
| <u>FEM1B</u>      | 4 | 1 | 3 |  |
| <u>FKBP5</u>      | 4 | 3 | 1 |  |
| <u>FOXC1</u>      | 4 | 2 | 2 |  |
| <u>FTL</u>        | 4 | 1 | 3 |  |
| <u>FUBP1</u>      | 4 | 1 | 3 |  |
| <u>GAA</u>        | 4 | 3 | 1 |  |
| <u>GMEB2</u>      | 4 | 2 | 2 |  |
| <u>GRB10</u>      | 4 | 1 | 3 |  |
| <u>GRN</u>        | 4 | 1 | 3 |  |
| <u>GRSF1</u>      | 4 | 1 | 3 |  |
| <u>HERC1</u>      | 4 | 2 | 2 |  |
| <u>HIBCH</u>      | 4 | 1 | 3 |  |
| <u>HIST1H2BE</u>  | 4 | 3 | 1 |  |
| <u>HMGCR</u>      | 4 | 2 | 2 |  |
| <u>HSPA4</u>      | 4 | 4 | 0 |  |
| <u>ID1</u>        | 4 | 4 | 0 |  |
| <u>IER3</u>       | 4 | 2 | 2 |  |
| <u>IFIT1</u>      | 4 | 3 | 1 |  |
| <u>IGF2R</u>      | 4 | 3 | 1 |  |
| <u>ISL1</u>       | 4 | 2 | 2 |  |
| <u>ITGA6</u>      | 4 | 1 | 3 |  |
| <u>IVNS1ABP</u>   | 4 | 1 | 3 |  |
| <u>KCNIP1</u>     | 4 | 2 | 2 |  |
| <u>KIAA0664L3</u> | 4 | 2 | 2 |  |
| <u>KIAA1324</u>   | 4 | 2 | 2 |  |
| <u>KLHL9</u>      | 4 | 2 | 2 |  |
| <u>KRAS</u>       | 4 | 2 | 2 |  |
| <u>KRT10</u>      | 4 | 3 | 1 |  |
| <u>LAD1</u>       | 4 | 2 | 2 |  |
| <u>MAP3K9</u>     | 4 | 2 | 2 |  |
| <u>MAST4</u>      | 4 | 0 | 4 |  |
| <u>MRPL16</u>     | 4 | 1 | 3 |  |
| <u>MRPS31</u>     | 4 | 2 | 2 |  |
| <u>MTMR4</u>      | 4 | 1 | 3 |  |
| <u>MYBL1</u>      | 4 | 2 | 2 |  |
| <u>NAP1L2</u>     | 4 | 2 | 2 |  |
| <u>NFKBIL1</u>    | 4 | 1 | 3 |  |
| <u>NFX1</u>       | 4 | 2 | 2 |  |
| <u>NME1</u>       | 4 | 2 | 2 |  |
| <u>NR3C1</u>      | 4 | 2 | 2 |  |
| <u>NUBP1</u>      | 4 | 1 | 3 |  |
| <u>NVL</u>        | 4 | 3 | 1 |  |
| <u>OSBPL1A</u>    | 4 | 1 | 3 |  |

|                 |   |   |   |  |
|-----------------|---|---|---|--|
| <u>PAAF1</u>    | 4 | 1 | 3 |  |
| <u>PARP2</u>    | 4 | 0 | 4 |  |
| <u>PCP4</u>     | 4 | 2 | 2 |  |
| <u>PDS5B</u>    | 4 | 3 | 1 |  |
| <u>PHB</u>      | 4 | 1 | 3 |  |
| <u>PODXL</u>    | 4 | 2 | 2 |  |
| <u>POLG2</u>    | 4 | 1 | 3 |  |
| <u>PPCDC</u>    | 4 | 2 | 2 |  |
| <u>PPME1</u>    | 4 | 3 | 1 |  |
| <u>PTCD3</u>    | 4 | 2 | 2 |  |
| <u>PTPN9</u>    | 4 | 1 | 3 |  |
| <u>PTRH2</u>    | 4 | 1 | 3 |  |
| <u>PWP1</u>     | 4 | 2 | 2 |  |
| <u>PYROXD1</u>  | 4 | 1 | 3 |  |
| <u>RAD9A</u>    | 4 | 2 | 2 |  |
| <u>RCOR1</u>    | 4 | 3 | 1 |  |
| <u>SAMM50</u>   | 4 | 2 | 2 |  |
| <u>SEC61A2</u>  | 4 | 2 | 2 |  |
| <u>SETD1B</u>   | 4 | 1 | 3 |  |
| <u>SFXN3</u>    | 4 | 2 | 2 |  |
| <u>SIDT1</u>    | 4 | 2 | 2 |  |
| <u>SLC12A2</u>  | 4 | 2 | 2 |  |
| <u>SLC25A37</u> | 4 | 1 | 3 |  |
| <u>SLC35E3</u>  | 4 | 1 | 3 |  |
| <u>SLC39A4</u>  | 4 | 2 | 2 |  |
| <u>SPRED2</u>   | 4 | 3 | 1 |  |
| <u>SRSF5</u>    | 4 | 2 | 2 |  |
| <u>STEAP1</u>   | 4 | 2 | 2 |  |
| <u>STK39</u>    | 4 | 2 | 2 |  |
| <u>STRN3</u>    | 4 | 2 | 2 |  |
| <u>SUV420H1</u> | 4 | 1 | 3 |  |
| <u>SYK</u>      | 4 | 2 | 2 |  |
| <u>TACC1</u>    | 4 | 2 | 2 |  |
| <u>TBC1D1</u>   | 4 | 2 | 2 |  |
| <u>TBCC</u>     | 4 | 2 | 2 |  |
| <u>TBL1XR1</u>  | 4 | 1 | 3 |  |
| <u>THBD</u>     | 4 | 1 | 3 |  |
| <u>TLK1</u>     | 4 | 1 | 3 |  |
| <u>TRIM33</u>   | 4 | 3 | 1 |  |
| <u>TRIM36</u>   | 4 | 3 | 1 |  |
| <u>TTI1</u>     | 4 | 1 | 3 |  |
| <u>TXNL4B</u>   | 4 | 2 | 2 |  |
| <u>UBE2C</u>    | 4 | 2 | 2 |  |
| <u>UBE2D3</u>   | 4 | 2 | 2 |  |
| <u>UCP2</u>     | 4 | 2 | 2 |  |
| <u>UFL1</u>     | 4 | 2 | 2 |  |
| <u>UNKL</u>     | 4 | 2 | 2 |  |
| <u>UQCRCF1</u>  | 4 | 2 | 2 |  |

|                 |   |   |   |  |
|-----------------|---|---|---|--|
| <u>VDR</u>      | 4 | 3 | 1 |  |
| <u>ZFAND1</u>   | 4 | 2 | 2 |  |
| <u>ZNF148</u>   | 4 | 2 | 2 |  |
| <u>ZNF23</u>    | 4 | 2 | 2 |  |
| <u>ZNF239</u>   | 4 | 2 | 2 |  |
| <u>ZNF337</u>   | 4 | 1 | 3 |  |
| <u>ZNF7</u>     | 4 | 1 | 3 |  |
| <u>ZNF783</u>   | 4 | 3 | 1 |  |
| <u>ZNF93</u>    | 4 | 2 | 2 |  |
| <u>AASDHPPT</u> | 3 | 1 | 2 |  |
| <u>ABCA11P</u>  | 3 | 2 | 1 |  |
| <u>ABCC5</u>    | 3 | 0 | 3 |  |
| <u>ABCF3</u>    | 3 | 1 | 2 |  |
| <u>ABHD3</u>    | 3 | 3 | 0 |  |
| <u>ACAT1</u>    | 3 | 1 | 2 |  |
| <u>ACD</u>      | 3 | 0 | 3 |  |
| <u>ACOT9</u>    | 3 | 1 | 2 |  |
| <u>ACSL3</u>    | 3 | 1 | 2 |  |
| <u>ADARB1</u>   | 3 | 1 | 2 |  |
| <u>ADCK3</u>    | 3 | 1 | 2 |  |
| <u>ADH1C</u>    | 3 | 1 | 2 |  |
| <u>ADNP2</u>    | 3 | 2 | 1 |  |
| <u>ADO</u>      | 3 | 1 | 2 |  |
| <u>AFF1</u>     | 3 | 1 | 2 |  |
| <u>AFF4</u>     | 3 | 2 | 1 |  |
| <u>AGPAT3</u>   | 3 | 2 | 1 |  |
| <u>AGXT2L1</u>  | 3 | 1 | 2 |  |
| <u>AHSA1</u>    | 3 | 1 | 2 |  |
| <u>AIMP1</u>    | 3 | 0 | 3 |  |
| <u>AKAP17A</u>  | 3 | 2 | 1 |  |
| <u>AKIP1</u>    | 3 | 1 | 2 |  |
| <u>ALAD</u>     | 3 | 1 | 2 |  |
| <u>ALAS1</u>    | 3 | 1 | 2 |  |
| <u>ALG13</u>    | 3 | 1 | 2 |  |
| <u>ALMS1</u>    | 3 | 0 | 3 |  |
| <u>ALS2CL</u>   | 3 | 1 | 2 |  |
| <u>ANKH</u>     | 3 | 1 | 2 |  |
| <u>ANO1</u>     | 3 | 1 | 2 |  |
| <u>APOBEC3B</u> | 3 | 2 | 1 |  |
| <u>APOE</u>     | 3 | 3 | 0 |  |
| <u>APPBP2</u>   | 3 | 2 | 1 |  |
| <u>APT-X</u>    | 3 | 0 | 3 |  |
| <u>ARCN1</u>    | 3 | 2 | 1 |  |
| <u>ARFGAP2</u>  | 3 | 3 | 0 |  |
| <u>ARFIP2</u>   | 3 | 2 | 1 |  |
| <u>ARHGAP17</u> | 3 | 1 | 2 |  |
| <u>ARHGEF26</u> | 3 | 1 | 2 |  |
| <u>ARHGEF7</u>  | 3 | 3 | 0 |  |

|                  |   |   |   |  |
|------------------|---|---|---|--|
| <u>ARID4A</u>    | 3 | 2 | 1 |  |
| <u>ARID5B</u>    | 3 | 2 | 1 |  |
| <u>ARL1</u>      | 3 | 0 | 3 |  |
| <u>ARMC6</u>     | 3 | 1 | 2 |  |
| <u>ASCC1</u>     | 3 | 1 | 2 |  |
| <u>ASCC3</u>     | 3 | 2 | 1 |  |
| <u>ASNA1</u>     | 3 | 2 | 1 |  |
| <u>ATF2</u>      | 3 | 2 | 1 |  |
| <u>ATG4A</u>     | 3 | 2 | 1 |  |
| <u>ATIC</u>      | 3 | 0 | 3 |  |
| <u>ATMIN</u>     | 3 | 0 | 3 |  |
| <u>ATP5C1</u>    | 3 | 2 | 1 |  |
| <u>ATP5O</u>     | 3 | 1 | 2 |  |
| <u>B4GALT1</u>   | 3 | 2 | 1 |  |
| <u>BAIAP2</u>    | 3 | 2 | 1 |  |
| <u>BANK1</u>     | 3 | 2 | 1 |  |
| <u>BBS7</u>      | 3 | 1 | 2 |  |
| <u>BCL2</u>      | 3 | 2 | 1 |  |
| <u>BICD1</u>     | 3 | 2 | 1 |  |
| <u>BLM</u>       | 3 | 1 | 2 |  |
| <u>BMI1</u>      | 3 | 1 | 2 |  |
| <u>BMPR1A</u>    | 3 | 1 | 2 |  |
| <u>BPGM</u>      | 3 | 0 | 3 |  |
| <u>BPIFA1</u>    | 3 | 1 | 2 |  |
| <u>BRE</u>       | 3 | 1 | 2 |  |
| <u>BRF2</u>      | 3 | 1 | 2 |  |
| <u>BRMS1</u>     | 3 | 2 | 1 |  |
| <u>BTG1</u>      | 3 | 2 | 1 |  |
| <u>C14ORF133</u> | 3 | 1 | 2 |  |
| <u>C19ORF24</u>  | 3 | 2 | 1 |  |
| <u>C20ORF103</u> | 3 | 1 | 2 |  |
| <u>C21ORF91</u>  | 3 | 2 | 1 |  |
| <u>C22ORF29</u>  | 3 | 2 | 1 |  |
| <u>C2ORF47</u>   | 3 | 2 | 1 |  |
| <u>C3</u>        | 3 | 2 | 1 |  |
| <u>C4ORF29</u>   | 3 | 1 | 2 |  |
| <u>C8ORF4</u>    | 3 | 2 | 1 |  |
| <u>CALM3</u>     | 3 | 2 | 1 |  |
| <u>CAMKK2</u>    | 3 | 2 | 1 |  |
| <u>CASP7</u>     | 3 | 2 | 1 |  |
| <u>CAT</u>       | 3 | 2 | 1 |  |
| <u>CBR4</u>      | 3 | 0 | 3 |  |
| <u>CCDC15</u>    | 3 | 1 | 2 |  |
| <u>CCHCR1</u>    | 3 | 1 | 2 |  |
| <u>CCNA2</u>     | 3 | 2 | 1 |  |
| <u>CCNE2</u>     | 3 | 2 | 1 |  |
| <u>CCNT1</u>     | 3 | 2 | 1 |  |
| <u>CCT6A</u>     | 3 | 1 | 2 |  |

|                 |   |   |   |  |
|-----------------|---|---|---|--|
| <u>CD80</u>     | 3 | 1 | 2 |  |
| <u>CDC16</u>    | 3 | 0 | 3 |  |
| <u>CDC42EP2</u> | 3 | 1 | 2 |  |
| <u>CDC42EP4</u> | 3 | 1 | 2 |  |
| <u>CDCP1</u>    | 3 | 1 | 2 |  |
| <u>CDK17</u>    | 3 | 2 | 1 |  |
| <u>CDR2L</u>    | 3 | 1 | 2 |  |
| <u>CEACAM6</u>  | 3 | 1 | 2 |  |
| <u>CEBPD</u>    | 3 | 2 | 1 |  |
| <u>CENPF</u>    | 3 | 3 | 0 |  |
| <u>CEP290</u>   | 3 | 2 | 1 |  |
| <u>CEP70</u>    | 3 | 1 | 2 |  |
| <u>CEP76</u>    | 3 | 1 | 2 |  |
| <u>CEPT1</u>    | 3 | 1 | 2 |  |
| <u>CETP</u>     | 3 | 1 | 2 |  |
| <u>CFLAR</u>    | 3 | 2 | 1 |  |
| <u>CGA</u>      | 3 | 2 | 1 |  |
| <u>CGGBP1</u>   | 3 | 2 | 1 |  |
| <u>CHAF1A</u>   | 3 | 2 | 1 |  |
| <u>CHD9</u>     | 3 | 2 | 1 |  |
| <u>CHERP</u>    | 3 | 2 | 1 |  |
| <u>CHKB</u>     | 3 | 2 | 1 |  |
| <u>CISH</u>     | 3 | 2 | 1 |  |
| <u>CITED2</u>   | 3 | 2 | 1 |  |
| <u>CLCN3</u>    | 3 | 1 | 2 |  |
| <u>CLMN</u>     | 3 | 1 | 2 |  |
| <u>CMAS</u>     | 3 | 1 | 2 |  |
| <u>CNOT6</u>    | 3 | 2 | 1 |  |
| <u>COCH</u>     | 3 | 2 | 1 |  |
| <u>COL17A1</u>  | 3 | 1 | 2 |  |
| <u>COL4A3BP</u> | 3 | 1 | 2 |  |
| <u>COL5A1</u>   | 3 | 2 | 1 |  |
| <u>COPS6</u>    | 3 | 2 | 1 |  |
| <u>COPS7B</u>   | 3 | 1 | 2 |  |
| <u>CPSF7</u>    | 3 | 2 | 1 |  |
| <u>CPT1A</u>    | 3 | 1 | 2 |  |
| <u>CRBN</u>     | 3 | 1 | 2 |  |
| <u>CRCP</u>     | 3 | 2 | 1 |  |
| <u>CREBL2</u>   | 3 | 1 | 2 |  |
| <u>CRELD2</u>   | 3 | 3 | 0 |  |
| <u>CRKL</u>     | 3 | 3 | 0 |  |
| <u>CRNKL1</u>   | 3 | 1 | 2 |  |
| <u>CSDE1</u>    | 3 | 2 | 1 |  |
| <u>CSNK2A2</u>  | 3 | 2 | 1 |  |
| <u>CSRP2</u>    | 3 | 2 | 1 |  |
| <u>CTBP1</u>    | 3 | 1 | 2 |  |
| <u>CTGF</u>     | 3 | 1 | 2 |  |
| <u>CTSK</u>     | 3 | 2 | 1 |  |

|                  |   |   |   |  |
|------------------|---|---|---|--|
| <u>CTSL2</u>     | 3 | 1 | 2 |  |
| <u>CXCL10</u>    | 3 | 3 | 0 |  |
| <u>CYB5R1</u>    | 3 | 1 | 2 |  |
| <u>CYP11B2</u>   | 3 | 2 | 1 |  |
| <u>CYP26A1</u>   | 3 | 2 | 1 |  |
| <u>CYP26B1</u>   | 3 | 1 | 2 |  |
| <u>CYP27B1</u>   | 3 | 2 | 1 |  |
| <u>CYR61</u>     | 3 | 2 | 1 |  |
| <u>DAAM1</u>     | 3 | 3 | 0 |  |
| <u>DARS</u>      | 3 | 1 | 2 |  |
| <u>DCK</u>       | 3 | 1 | 2 |  |
| <u>DCUN1D2</u>   | 3 | 1 | 2 |  |
| <u>DDX17</u>     | 3 | 2 | 1 |  |
| <u>DDX31</u>     | 3 | 1 | 2 |  |
| <u>DDX52</u>     | 3 | 2 | 1 |  |
| <u>DEGS1</u>     | 3 | 3 | 0 |  |
| <u>DEK</u>       | 3 | 1 | 2 |  |
| <u>DENND2D</u>   | 3 | 1 | 2 |  |
| <u>DENND4A</u>   | 3 | 2 | 1 |  |
| <u>DENND4B</u>   | 3 | 1 | 2 |  |
| <u>DENND4C</u>   | 3 | 1 | 2 |  |
| <u>DERA</u>      | 3 | 2 | 1 |  |
| <u>DIAPH2</u>    | 3 | 1 | 2 |  |
| <u>DIO2</u>      | 3 | 1 | 2 |  |
| <u>DIP2C</u>     | 3 | 1 | 2 |  |
| <u>DIXDC1</u>    | 3 | 1 | 2 |  |
| <u>DLAT</u>      | 3 | 1 | 2 |  |
| <u>DLD</u>       | 3 | 2 | 1 |  |
| <u>DLG1</u>      | 3 | 2 | 1 |  |
| <u>DNAJA3</u>    | 3 | 1 | 2 |  |
| <u>DNAJB9</u>    | 3 | 1 | 2 |  |
| <u>DSE</u>       | 3 | 1 | 2 |  |
| <u>DUSP12</u>    | 3 | 1 | 2 |  |
| <u>DUSP3</u>     | 3 | 1 | 2 |  |
| <u>DYRK2</u>     | 3 | 1 | 2 |  |
| <u>DZIP3</u>     | 3 | 2 | 1 |  |
| <u>EBP</u>       | 3 | 1 | 2 |  |
| <u>ECHDC3</u>    | 3 | 2 | 1 |  |
| <u>EFHD2</u>     | 3 | 2 | 1 |  |
| <u>EFNB2</u>     | 3 | 1 | 2 |  |
| <u>EGR3</u>      | 3 | 2 | 1 |  |
| <u>EIF2B3</u>    | 3 | 0 | 3 |  |
| <u>EIF2C3</u>    | 3 | 2 | 1 |  |
| <u>EIF3A</u>     | 3 | 1 | 2 |  |
| <u>EIF4ENIF1</u> | 3 | 1 | 2 |  |
| <u>ELF2</u>      | 3 | 3 | 0 |  |
| <u>ELF3</u>      | 3 | 1 | 2 |  |
| <u>ELF5</u>      | 3 | 2 | 1 |  |

|                  |   |   |   |  |
|------------------|---|---|---|--|
| <u>ELK4</u>      | 3 | 2 | 1 |  |
| <u>ELOVL4</u>    | 3 | 2 | 1 |  |
| <u>ENGASE</u>    | 3 | 2 | 1 |  |
| <u>ENOX2</u>     | 3 | 0 | 3 |  |
| <u>ENTPD6</u>    | 3 | 2 | 1 |  |
| <u>EP300</u>     | 3 | 2 | 1 |  |
| <u>ERCC2</u>     | 3 | 0 | 3 |  |
| <u>ERF</u>       | 3 | 2 | 1 |  |
| <u>ERI2</u>      | 3 | 1 | 2 |  |
| <u>ERN2</u>      | 3 | 2 | 1 |  |
| <u>ETAA1</u>     | 3 | 1 | 2 |  |
| <u>EXOG</u>      | 3 | 2 | 1 |  |
| <u>EXOSC4</u>    | 3 | 2 | 1 |  |
| <u>EXOSC8</u>    | 3 | 0 | 3 |  |
| <u>F11R</u>      | 3 | 2 | 1 |  |
| <u>F8</u>        | 3 | 1 | 2 |  |
| <u>F9</u>        | 3 | 1 | 2 |  |
| <u>FAAH</u>      | 3 | 2 | 1 |  |
| <u>FADD</u>      | 3 | 1 | 2 |  |
| <u>FAM117A</u>   | 3 | 1 | 2 |  |
| <u>FAM179B</u>   | 3 | 1 | 2 |  |
| <u>FAM46C</u>    | 3 | 2 | 1 |  |
| <u>FAM57A</u>    | 3 | 1 | 2 |  |
| <u>FAM86C1</u>   | 3 | 1 | 2 |  |
| <u>FANCI</u>     | 3 | 1 | 2 |  |
| <u>FASTKD1</u>   | 3 | 0 | 3 |  |
| <u>FASTKD2</u>   | 3 | 2 | 1 |  |
| <u>FBXO38</u>    | 3 | 2 | 1 |  |
| <u>FGFR2</u>     | 3 | 2 | 1 |  |
| <u>FHOD1</u>     | 3 | 1 | 2 |  |
| <u>FIX1</u>      | 3 | 1 | 2 |  |
| FLJ10038         | 3 | 1 | 2 |  |
| <u>FMNL1</u>     | 3 | 2 | 1 |  |
| <u>FN3KRP</u>    | 3 | 2 | 1 |  |
| <u>FOXM1</u>     | 3 | 2 | 1 |  |
| <u>FRAT2</u>     | 3 | 2 | 1 |  |
| <u>FRYL</u>      | 3 | 2 | 1 |  |
| <u>FSTL3</u>     | 3 | 3 | 0 |  |
| <u>FUT3</u>      | 3 | 1 | 2 |  |
| <u>GABARAPL1</u> | 3 | 3 | 0 |  |
| <u>GABPA</u>     | 3 | 2 | 1 |  |
| <u>GADD45G</u>   | 3 | 1 | 2 |  |
| <u>GALE</u>      | 3 | 1 | 2 |  |
| <u>GALNT10</u>   | 3 | 1 | 2 |  |
| <u>GALNT11</u>   | 3 | 2 | 1 |  |
| <u>GALNT6</u>    | 3 | 0 | 3 |  |
| <u>GART</u>      | 3 | 1 | 2 |  |
| <u>GATA2</u>     | 3 | 2 | 1 |  |

|                  |   |   |   |  |
|------------------|---|---|---|--|
| <u>GGH</u>       | 3 | 3 | 0 |  |
| <u>GLOD4</u>     | 3 | 1 | 2 |  |
| <u>GLRX2</u>     | 3 | 0 | 3 |  |
| <u>GLRX5</u>     | 3 | 1 | 2 |  |
| <u>GLUD2</u>     | 3 | 1 | 2 |  |
| <u>GNA11</u>     | 3 | 1 | 2 |  |
| <u>GNB2L1</u>    | 3 | 1 | 2 |  |
| <u>GNMT</u>      | 3 | 2 | 1 |  |
| <u>GORASP2</u>   | 3 | 0 | 3 |  |
| <u>GOSR1</u>     | 3 | 1 | 2 |  |
| <u>GPD1</u>      | 3 | 1 | 2 |  |
| <u>GPR19</u>     | 3 | 1 | 2 |  |
| <u>GREB1</u>     | 3 | 2 | 1 |  |
| <u>H2AFY2</u>    | 3 | 2 | 1 |  |
| <u>H2BFS</u>     | 3 | 1 | 2 |  |
| <u>HDGF</u>      | 3 | 2 | 1 |  |
| <u>HELZ</u>      | 3 | 2 | 1 |  |
| <u>HERC2</u>     | 3 | 1 | 2 |  |
| <u>HINFP</u>     | 3 | 2 | 1 |  |
| <u>HIST1H2BF</u> | 3 | 2 | 1 |  |
| <u>HIST1H2BH</u> | 3 | 3 | 0 |  |
| <u>HIST1H4C</u>  | 3 | 2 | 1 |  |
| <u>HIST3H2A</u>  | 3 | 2 | 1 |  |
| <u>HIVEP1</u>    | 3 | 2 | 1 |  |
| <u>HJURP</u>     | 3 | 2 | 1 |  |
| <u>HNRNPA3</u>   | 3 | 0 | 3 |  |
| <u>HOXA10</u>    | 3 | 2 | 1 |  |
| <u>HOXC13</u>    | 3 | 1 | 2 |  |
| <u>ICT1</u>      | 3 | 2 | 1 |  |
| <u>ID3</u>       | 3 | 3 | 0 |  |
| <u>IFT88</u>     | 3 | 1 | 2 |  |
| <u>IL11</u>      | 3 | 2 | 1 |  |
| <u>IL1R1</u>     | 3 | 2 | 1 |  |
| <u>IL24</u>      | 3 | 1 | 2 |  |
| <u>IL6ST</u>     | 3 | 2 | 1 |  |
| <u>INPP1</u>     | 3 | 2 | 1 |  |
| <u>INS</u>       | 3 | 1 | 2 |  |
| <u>INTS3</u>     | 3 | 1 | 2 |  |
| <u>IPPK</u>      | 3 | 1 | 2 |  |
| <u>IRGQ</u>      | 3 | 2 | 1 |  |
| <u>IRX4</u>      | 3 | 1 | 2 |  |
| <u>IRX5</u>      | 3 | 0 | 3 |  |
| <u>IST1</u>      | 3 | 3 | 0 |  |
| <u>IVL</u>       | 3 | 1 | 2 |  |
| <u>JMJD6</u>     | 3 | 2 | 1 |  |
| <u>JUNB</u>      | 3 | 1 | 2 |  |
| <u>KAZALD1</u>   | 3 | 1 | 2 |  |
| <u>KCTD3</u>     | 3 | 1 | 2 |  |

|                 |   |   |   |  |
|-----------------|---|---|---|--|
| <u>KDELR3</u>   | 3 | 1 | 2 |  |
| <u>KIAA0430</u> | 3 | 1 | 2 |  |
| <u>KIAA0754</u> | 3 | 1 | 2 |  |
| <u>KIAA0894</u> | 3 | 2 | 1 |  |
| <u>KIAA1024</u> | 3 | 1 | 2 |  |
| <u>KIAA1109</u> | 3 | 2 | 1 |  |
| <u>KIF15</u>    | 3 | 1 | 2 |  |
| <u>KIF16B</u>   | 3 | 1 | 2 |  |
| <u>KIF18A</u>   | 3 | 2 | 1 |  |
| <u>KIF1B</u>    | 3 | 1 | 2 |  |
| <u>KIF20A</u>   | 3 | 3 | 0 |  |
| <u>KLF10</u>    | 3 | 1 | 2 |  |
| <u>KLF11</u>    | 3 | 1 | 2 |  |
| <u>KLHDC2</u>   | 3 | 1 | 2 |  |
| <u>KLK2</u>     | 3 | 3 | 0 |  |
| <u>KPNA5</u>    | 3 | 2 | 1 |  |
| <u>KRIT1</u>    | 3 | 1 | 2 |  |
| <u>KRT3</u>     | 3 | 1 | 2 |  |
| <u>KRT6A</u>    | 3 | 3 | 0 |  |
| <u>KRT8P12</u>  | 3 | 1 | 2 |  |
| <u>LCMT2</u>    | 3 | 2 | 1 |  |
| <u>LEMD3</u>    | 3 | 1 | 2 |  |
| <u>LHFPL2</u>   | 3 | 1 | 2 |  |
| <u>LIAS</u>     | 3 | 1 | 2 |  |
| <u>LIMA1</u>    | 3 | 2 | 1 |  |
| <u>LIN7C</u>    | 3 | 2 | 1 |  |
| <u>LRRC16A</u>  | 3 | 1 | 2 |  |
| <u>LRRC8D</u>   | 3 | 1 | 2 |  |
| <u>LRRC8E</u>   | 3 | 2 | 1 |  |
| <u>LSM14A</u>   | 3 | 2 | 1 |  |
| <u>LTBP1</u>    | 3 | 1 | 2 |  |
| <u>LYST</u>     | 3 | 3 | 0 |  |
| <u>MAFB</u>     | 3 | 1 | 2 |  |
| <u>MAGEF1</u>   | 3 | 0 | 3 |  |
| <u>MALT1</u>    | 3 | 1 | 2 |  |
| <u>MAP2K5</u>   | 3 | 1 | 2 |  |
| <u>MAP3K5</u>   | 3 | 0 | 3 |  |
| <u>MAP3K7</u>   | 3 | 1 | 2 |  |
| <u>MAPT</u>     | 3 | 2 | 1 |  |
| <u>MARCH6</u>   | 3 | 2 | 1 |  |
| <u>MARCH8</u>   | 3 | 1 | 2 |  |
| <u>MAX</u>      | 3 | 1 | 2 |  |
| <u>MBNL1</u>    | 3 | 1 | 2 |  |
| <u>MCL1</u>     | 3 | 1 | 2 |  |
| <u>MCMBP</u>    | 3 | 1 | 2 |  |
| <u>MDM2</u>     | 3 | 1 | 2 |  |
| <u>MED13</u>    | 3 | 2 | 1 |  |
| <u>MED13L</u>   | 3 | 1 | 2 |  |

|                  |   |   |   |  |
|------------------|---|---|---|--|
| <u>MED15</u>     | 3 | 1 | 2 |  |
| <u>MEG3</u>      | 3 | 2 | 1 |  |
| <u>MEIS1</u>     | 3 | 2 | 1 |  |
| <u>MEPCE</u>     | 3 | 0 | 3 |  |
| <u>METAP2</u>    | 3 | 0 | 3 |  |
| <u>METTL9</u>    | 3 | 2 | 1 |  |
| <u>MFAP1</u>     | 3 | 2 | 1 |  |
| <u>MGLL</u>      | 3 | 1 | 2 |  |
| <u>MINPP1</u>    | 3 | 2 | 1 |  |
| <u>MLF1</u>      | 3 | 0 | 3 |  |
| <u>MLL</u>       | 3 | 2 | 1 |  |
| <u>MLPH</u>      | 3 | 1 | 2 |  |
| <u>MMD</u>       | 3 | 2 | 1 |  |
| <u>MMP19</u>     | 3 | 2 | 1 |  |
| <u>MNX1</u>      | 3 | 1 | 2 |  |
| <u>MORF4L2</u>   | 3 | 2 | 1 |  |
| <u>MPHOSPH10</u> | 3 | 1 | 2 |  |
| <u>MRPL15</u>    | 3 | 0 | 3 |  |
| <u>MRPS27</u>    | 3 | 1 | 2 |  |
| <u>MRTO4</u>     | 3 | 1 | 2 |  |
| <u>MSL1</u>      | 3 | 1 | 2 |  |
| <u>MSL2</u>      | 3 | 2 | 1 |  |
| <u>MT1H</u>      | 3 | 2 | 1 |  |
| <u>MTFR1</u>     | 3 | 2 | 1 |  |
| <u>MTHFSD</u>    | 3 | 1 | 2 |  |
| <u>MTIF2</u>     | 3 | 1 | 2 |  |
| <u>MTMR11</u>    | 3 | 1 | 2 |  |
| <u>MTMR14</u>    | 3 | 2 | 1 |  |
| <u>MTMR6</u>     | 3 | 1 | 2 |  |
| <u>MTSS1</u>     | 3 | 2 | 1 |  |
| <u>MTUS1</u>     | 3 | 1 | 2 |  |
| <u>MTX2</u>      | 3 | 1 | 2 |  |
| <u>MUM1</u>      | 3 | 1 | 2 |  |
| <u>MXD1</u>      | 3 | 2 | 1 |  |
| <u>MYB</u>       | 3 | 2 | 1 |  |
| <u>MYRIP</u>     | 3 | 2 | 1 |  |
| <u>N4BP2L2</u>   | 3 | 1 | 2 |  |
| <u>NAPA</u>      | 3 | 2 | 1 |  |
| <u>NCAPG</u>     | 3 | 2 | 1 |  |
| <u>NCKAP1</u>    | 3 | 1 | 2 |  |
| <u>NDE1</u>      | 3 | 2 | 1 |  |
| <u>NEDD4</u>     | 3 | 0 | 3 |  |
| <u>NEDD9</u>     | 3 | 2 | 1 |  |
| <u>NEK1</u>      | 3 | 1 | 2 |  |
| <u>NEMF</u>      | 3 | 1 | 2 |  |
| <u>NFE2L1</u>    | 3 | 2 | 1 |  |
| <u>NFYA</u>      | 3 | 1 | 2 |  |
| <u>NIF3L1</u>    | 3 | 1 | 2 |  |

|                |   |   |   |  |
|----------------|---|---|---|--|
| <u>NOP56</u>   | 3 | 1 | 2 |  |
| <u>NOTCH2</u>  | 3 | 2 | 1 |  |
| <u>NR1D2</u>   | 3 | 2 | 1 |  |
| <u>NR2C2</u>   | 3 | 2 | 1 |  |
| <u>NRIP1</u>   | 3 | 2 | 1 |  |
| <u>NSDHL</u>   | 3 | 2 | 1 |  |
| <u>NSMAF</u>   | 3 | 1 | 2 |  |
| <u>NSMCE4A</u> | 3 | 1 | 2 |  |
| <u>NTHL1</u>   | 3 | 1 | 2 |  |
| <u>NUP107</u>  | 3 | 0 | 3 |  |
| <u>NUP98</u>   | 3 | 0 | 3 |  |
| <u>NXT1</u>    | 3 | 1 | 2 |  |
| <u>OAZ2</u>    | 3 | 1 | 2 |  |
| <u>ODAM</u>    | 3 | 1 | 2 |  |
| <u>OGFR</u>    | 3 | 1 | 2 |  |
| <u>OGT</u>     | 3 | 2 | 1 |  |
| <u>OR7E14P</u> | 3 | 2 | 1 |  |
| <u>OSBPL11</u> | 3 | 1 | 2 |  |
| <u>OXA1L</u>   | 3 | 1 | 2 |  |
| <u>OXSM</u>    | 3 | 1 | 2 |  |
| <u>P2RX5</u>   | 3 | 1 | 2 |  |
| <u>PABPN1</u>  | 3 | 2 | 1 |  |
| <u>PAK1IP1</u> | 3 | 0 | 3 |  |
| <u>PAN2</u>    | 3 | 1 | 2 |  |
| <u>PANX1</u>   | 3 | 0 | 3 |  |
| <u>PAPOLA</u>  | 3 | 1 | 2 |  |
| <u>PARP4</u>   | 3 | 0 | 3 |  |
| <u>PATZ1</u>   | 3 | 2 | 1 |  |
| <u>PCBP2</u>   | 3 | 1 | 2 |  |
| <u>PCIF1</u>   | 3 | 2 | 1 |  |
| <u>PCMTD2</u>  | 3 | 0 | 3 |  |
| <u>PCTP</u>    | 3 | 2 | 1 |  |
| <u>PDHA1</u>   | 3 | 1 | 2 |  |
| <u>PDK4</u>    | 3 | 1 | 2 |  |
| <u>PDLIM5</u>  | 3 | 3 | 0 |  |
| <u>PDZD2</u>   | 3 | 3 | 0 |  |
| <u>PER2</u>    | 3 | 1 | 2 |  |
| <u>PER3</u>    | 3 | 1 | 2 |  |
| <u>PEX13</u>   | 3 | 2 | 1 |  |
| <u>PHF10</u>   | 3 | 1 | 2 |  |
| <u>PID1</u>    | 3 | 2 | 1 |  |
| <u>PIEZO2</u>  | 3 | 1 | 2 |  |
| <u>PIK3R3</u>  | 3 | 3 | 0 |  |
| <u>PITPNB</u>  | 3 | 2 | 1 |  |
| <u>PLAUR</u>   | 3 | 1 | 2 |  |
| <u>PLEK2</u>   | 3 | 2 | 1 |  |
| <u>PLK1</u>    | 3 | 1 | 2 |  |
| <u>PLK4</u>    | 3 | 3 | 0 |  |

|                 |   |   |   |  |
|-----------------|---|---|---|--|
| <u>PLP2</u>     | 3 | 2 | 1 |  |
| <u>PNP</u>      | 3 | 1 | 2 |  |
| <u>POF1B</u>    | 3 | 1 | 2 |  |
| <u>POGZ</u>     | 3 | 2 | 1 |  |
| <u>POLD2</u>    | 3 | 1 | 2 |  |
| <u>POLI</u>     | 3 | 2 | 1 |  |
| <u>POLR3G</u>   | 3 | 1 | 2 |  |
| <u>POT1</u>     | 3 | 0 | 3 |  |
| <u>POU2F1</u>   | 3 | 2 | 1 |  |
| <u>PPARD</u>    | 3 | 2 | 1 |  |
| <u>PPL</u>      | 3 | 2 | 1 |  |
| <u>PPM1B</u>    | 3 | 2 | 1 |  |
| <u>PPP1R12A</u> | 3 | 2 | 1 |  |
| <u>PPP2R5C</u>  | 3 | 1 | 2 |  |
| <u>PPRC1</u>    | 3 | 1 | 2 |  |
| <u>PPWD1</u>    | 3 | 1 | 2 |  |
| <u>PRDM10</u>   | 3 | 2 | 1 |  |
| <u>PRDM4</u>    | 3 | 1 | 2 |  |
| <u>PRIM1</u>    | 3 | 2 | 1 |  |
| <u>PRMT1</u>    | 3 | 2 | 1 |  |
| <u>PRPF4B</u>   | 3 | 1 | 2 |  |
| <u>PRR7</u>     | 3 | 1 | 2 |  |
| <u>PSMB9</u>    | 3 | 2 | 1 |  |
| <u>PSMD7</u>    | 3 | 1 | 2 |  |
| <u>PSME4</u>    | 3 | 1 | 2 |  |
| <u>PTBP2</u>    | 3 | 2 | 1 |  |
| <u>PTCRA</u>    | 3 | 1 | 2 |  |
| <u>PTMA</u>     | 3 | 2 | 1 |  |
| <u>PTMS</u>     | 3 | 2 | 1 |  |
| <u>PTPN12</u>   | 3 | 2 | 1 |  |
| <u>PTX3</u>     | 3 | 1 | 2 |  |
| <u>PUM2</u>     | 3 | 1 | 2 |  |
| <u>PURA</u>     | 3 | 1 | 2 |  |
| <u>PUS7</u>     | 3 | 2 | 1 |  |
| <u>PWP2</u>     | 3 | 0 | 3 |  |
| <u>RAB14</u>    | 3 | 2 | 1 |  |
| <u>RAB2A</u>    | 3 | 1 | 2 |  |
| <u>RAB32</u>    | 3 | 2 | 1 |  |
| <u>RAB40B</u>   | 3 | 1 | 2 |  |
| <u>RAB4A</u>    | 3 | 2 | 1 |  |
| <u>RAB5B</u>    | 3 | 1 | 2 |  |
| <u>RANBP2</u>   | 3 | 2 | 1 |  |
| <u>RANGAP1</u>  | 3 | 1 | 2 |  |
| <u>RAPGEF2</u>  | 3 | 2 | 1 |  |
| <u>RARG</u>     | 3 | 3 | 0 |  |
| <u>RBM15B</u>   | 3 | 0 | 3 |  |
| <u>RBM38</u>    | 3 | 1 | 2 |  |
| <u>RCHY1</u>    | 3 | 2 | 1 |  |

|                 |   |   |   |  |
|-----------------|---|---|---|--|
| <u>RECQL</u>    | 3 | 2 | 1 |  |
| <u>RECQL5</u>   | 3 | 2 | 1 |  |
| <u>REEP1</u>    | 3 | 2 | 1 |  |
| <u>REEP5</u>    | 3 | 1 | 2 |  |
| <u>REG1B</u>    | 3 | 1 | 2 |  |
| <u>RETSAT</u>   | 3 | 1 | 2 |  |
| <u>RGS10</u>    | 3 | 2 | 1 |  |
| <u>RGS3</u>     | 3 | 2 | 1 |  |
| <u>RHBG</u>     | 3 | 1 | 2 |  |
| <u>RIBC2</u>    | 3 | 2 | 1 |  |
| <u>RIOK2</u>    | 3 | 1 | 2 |  |
| <u>RIPK4</u>    | 3 | 2 | 1 |  |
| <u>RIT1</u>     | 3 | 2 | 1 |  |
| <u>RNF111</u>   | 3 | 2 | 1 |  |
| <u>RNF113A</u>  | 3 | 1 | 2 |  |
| <u>RNF6</u>     | 3 | 1 | 2 |  |
| <u>RPL11</u>    | 3 | 1 | 2 |  |
| <u>RPL4</u>     | 3 | 1 | 2 |  |
| <u>RPP14</u>    | 3 | 2 | 1 |  |
| <u>RPRD2</u>    | 3 | 2 | 1 |  |
| <u>RRAS2</u>    | 3 | 2 | 1 |  |
| <u>RRP1</u>     | 3 | 0 | 3 |  |
| <u>RRP7A</u>    | 3 | 1 | 2 |  |
| <u>RSAD2</u>    | 3 | 2 | 1 |  |
| <u>RSBN1</u>    | 3 | 1 | 2 |  |
| <u>RTF1</u>     | 3 | 1 | 2 |  |
| <u>RTN4</u>     | 3 | 2 | 1 |  |
| <u>RWDD3</u>    | 3 | 0 | 3 |  |
| <u>RYBP</u>     | 3 | 2 | 1 |  |
| <u>SACS</u>     | 3 | 1 | 2 |  |
| <u>SAFB2</u>    | 3 | 2 | 1 |  |
| <u>SCAMP1</u>   | 3 | 0 | 3 |  |
| <u>SCD5</u>     | 3 | 1 | 2 |  |
| <u>SCFD1</u>    | 3 | 2 | 1 |  |
| <u>SCMH1</u>    | 3 | 1 | 2 |  |
| <u>SCNN1A</u>   | 3 | 2 | 1 |  |
| <u>SDHAF1</u>   | 3 | 2 | 1 |  |
| <u>SEC24D</u>   | 3 | 2 | 1 |  |
| <u>SESN1</u>    | 3 | 0 | 3 |  |
| <u>SETD2</u>    | 3 | 2 | 1 |  |
| <u>SGPP1</u>    | 3 | 2 | 1 |  |
| <u>SH3D21</u>   | 3 | 1 | 2 |  |
| <u>SIAH1</u>    | 3 | 2 | 1 |  |
| <u>SLC16A1</u>  | 3 | 1 | 2 |  |
| <u>SLC25A13</u> | 3 | 0 | 3 |  |
| <u>SLC26A2</u>  | 3 | 2 | 1 |  |
| <u>SLC33A1</u>  | 3 | 0 | 3 |  |
| <u>SLC37A1</u>  | 3 | 2 | 1 |  |

|                |   |   |   |  |
|----------------|---|---|---|--|
| <u>SLC41A3</u> | 3 | 1 | 2 |  |
| <u>SLC4A7</u>  | 3 | 2 | 1 |  |
| <u>SLCO4A1</u> | 3 | 2 | 1 |  |
| <u>SLMO2</u>   | 3 | 1 | 2 |  |
| <u>SMAD7</u>   | 3 | 2 | 1 |  |
| <u>SMCHD1</u>  | 3 | 1 | 2 |  |
| <u>SNAP23</u>  | 3 | 2 | 1 |  |
| <u>SNORA21</u> | 3 | 1 | 2 |  |
| <u>SNRBP2</u>  | 3 | 2 | 1 |  |
| <u>SNX10</u>   | 3 | 2 | 1 |  |
| <u>SOCS5</u>   | 3 | 2 | 1 |  |
| <u>SOX4</u>    | 3 | 1 | 2 |  |
| <u>SPAG9</u>   | 3 | 3 | 0 |  |
| <u>SPATA2L</u> | 3 | 1 | 2 |  |
| <u>SPATA6</u>  | 3 | 1 | 2 |  |
| <u>SPR</u>     | 3 | 2 | 1 |  |
| <u>SRSF4</u>   | 3 | 2 | 1 |  |
| <u>SSH1</u>    | 3 | 1 | 2 |  |
| <u>STAG1</u>   | 3 | 2 | 1 |  |
| <u>STAM2</u>   | 3 | 2 | 1 |  |
| <u>STAT3</u>   | 3 | 2 | 1 |  |
| <u>STAT5A</u>  | 3 | 3 | 0 |  |
| <u>STAT5B</u>  | 3 | 0 | 3 |  |
| <u>STEAP3</u>  | 3 | 1 | 2 |  |
| <u>STK17A</u>  | 3 | 3 | 0 |  |
| <u>STOML2</u>  | 3 | 2 | 1 |  |
| <u>STX3</u>    | 3 | 2 | 1 |  |
| <u>SUB1</u>    | 3 | 1 | 2 |  |
| <u>SYBU</u>    | 3 | 0 | 3 |  |
| <u>SYNJ2</u>   | 3 | 2 | 1 |  |
| <u>TAF4B</u>   | 3 | 2 | 1 |  |
| <u>TAF5</u>    | 3 | 1 | 2 |  |
| <u>TAOK2</u>   | 3 | 1 | 2 |  |
| <u>TBC1D5</u>  | 3 | 2 | 1 |  |
| <u>TBKBP1</u>  | 3 | 1 | 2 |  |
| <u>TBPL1</u>   | 3 | 3 | 0 |  |
| <u>TBX2</u>    | 3 | 2 | 1 |  |
| <u>TCF25</u>   | 3 | 2 | 1 |  |
| <u>TCF3</u>    | 3 | 2 | 1 |  |
| <u>TCIRG1</u>  | 3 | 1 | 2 |  |
| <u>TEAD1</u>   | 3 | 1 | 2 |  |
| <u>TFAP2C</u>  | 3 | 2 | 1 |  |
| <u>TGDS</u>    | 3 | 0 | 3 |  |
| <u>TGFB2</u>   | 3 | 2 | 1 |  |
| <u>THAP1</u>   | 3 | 2 | 1 |  |
| <u>THNSL1</u>  | 3 | 1 | 2 |  |
| <u>TIMM9</u>   | 3 | 2 | 1 |  |
| <u>TIPARP</u>  | 3 | 2 | 1 |  |

|                  |   |   |   |  |
|------------------|---|---|---|--|
| <u>TMBIM4</u>    | 3 | 1 | 2 |  |
| <u>TMEM123</u>   | 3 | 2 | 1 |  |
| <u>TMEM140</u>   | 3 | 1 | 2 |  |
| <u>TMEM147</u>   | 3 | 1 | 2 |  |
| <u>TMEM177</u>   | 3 | 2 | 1 |  |
| <u>TMEM185B</u>  | 3 | 1 | 2 |  |
| <u>TMEM194A</u>  | 3 | 1 | 2 |  |
| <u>TMEM97</u>    | 3 | 1 | 2 |  |
| <u>TNFAIP2</u>   | 3 | 2 | 1 |  |
| <u>TNFRSF12A</u> | 3 | 1 | 2 |  |
| <u>TNFSF13</u>   | 3 | 1 | 2 |  |
| <u>TOMM20</u>    | 3 | 0 | 3 |  |
| <u>TOPORS</u>    | 3 | 2 | 1 |  |
| <u>TP53I3</u>    | 3 | 1 | 2 |  |
| <u>TPST1</u>     | 3 | 2 | 1 |  |
| <u>TRA2A</u>     | 3 | 2 | 1 |  |
| <u>TRAFD1</u>    | 3 | 1 | 2 |  |
| <u>TRIM13</u>    | 3 | 3 | 0 |  |
| <u>TRIT1</u>     | 3 | 2 | 1 |  |
| <u>TSPAN6</u>    | 3 | 1 | 2 |  |
| <u>TTC23</u>     | 3 | 2 | 1 |  |
| <u>TTC4</u>      | 3 | 1 | 2 |  |
| <u>TUBB3</u>     | 3 | 2 | 1 |  |
| <u>TUFT1</u>     | 3 | 2 | 1 |  |
| <u>U2AF1</u>     | 3 | 1 | 2 |  |
| <u>U2SURP</u>    | 3 | 1 | 2 |  |
| <u>UBR2</u>      | 3 | 2 | 1 |  |
| <u>UBR5</u>      | 3 | 2 | 1 |  |
| <u>UBR7</u>      | 3 | 0 | 3 |  |
| <u>ULK1</u>      | 3 | 1 | 2 |  |
| <u>USP47</u>     | 3 | 3 | 0 |  |
| <u>USP9X</u>     | 3 | 2 | 1 |  |
| <u>UTP14A</u>    | 3 | 1 | 2 |  |
| <u>VEZF1</u>     | 3 | 1 | 2 |  |
| <u>VRK3</u>      | 3 | 2 | 1 |  |
| <u>VTN</u>       | 3 | 2 | 1 |  |
| <u>WDFY3</u>     | 3 | 2 | 1 |  |
| <u>WDTA1</u>     | 3 | 1 | 2 |  |
| <u>WIPF2</u>     | 3 | 1 | 2 |  |
| <u>WRB</u>       | 3 | 1 | 2 |  |
| <u>WWTR1</u>     | 3 | 2 | 1 |  |
| <u>XPA</u>       | 3 | 1 | 2 |  |
| <u>ZBED1</u>     | 3 | 1 | 2 |  |
| <u>ZBED5</u>     | 3 | 2 | 1 |  |
| <u>ZBTB24</u>    | 3 | 1 | 2 |  |
| <u>ZBTB43</u>    | 3 | 1 | 2 |  |
| <u>ZFP30</u>     | 3 | 1 | 2 |  |
| <u>ZFX</u>       | 3 | 2 | 1 |  |

|                |   |   |   |  |
|----------------|---|---|---|--|
| ZIC1           | 3 | 1 | 2 |  |
| ZMYM2          | 3 | 3 | 0 |  |
| ZMYND8         | 3 | 2 | 1 |  |
| ZNF14          | 3 | 1 | 2 |  |
| ZNF165         | 3 | 1 | 2 |  |
| ZNF184         | 3 | 1 | 2 |  |
| ZNF189         | 3 | 1 | 2 |  |
| ZNF200         | 3 | 1 | 2 |  |
| ZNF22          | 3 | 0 | 3 |  |
| ZNF226         | 3 | 3 | 0 |  |
| ZNF302         | 3 | 2 | 1 |  |
| ZNF419         | 3 | 2 | 1 |  |
| ZNF473         | 3 | 0 | 3 |  |
| ZNF551         | 3 | 1 | 2 |  |
| ZXDC           | 3 | 0 | 3 |  |
| <u>AARS</u>    | 2 | 0 | 2 |  |
| <u>ABCA3</u>   | 2 | 0 | 2 |  |
| <u>ABCC6</u>   | 2 | 2 | 0 |  |
| <u>ABCF2</u>   | 2 | 0 | 2 |  |
| <u>ABHD10</u>  | 2 | 0 | 2 |  |
| <u>ABHD11</u>  | 2 | 2 | 0 |  |
| <u>ABR</u>     | 2 | 0 | 2 |  |
| <u>ACOT8</u>   | 2 | 2 | 0 |  |
| <u>ACPP</u>    | 2 | 2 | 0 |  |
| <u>ACTR3B</u>  | 2 | 0 | 2 |  |
| <u>ACVR2A</u>  | 2 | 2 | 0 |  |
| <u>ADAMTS9</u> | 2 | 0 | 2 |  |
| <u>ADCY3</u>   | 2 | 0 | 2 |  |
| <u>ADH5</u>    | 2 | 0 | 2 |  |
| <u>ADORA2B</u> | 2 | 0 | 2 |  |
| <u>ADRBK1</u>  | 2 | 2 | 0 |  |
| <u>AFM</u>     | 2 | 2 | 0 |  |
| <u>AGGF1</u>   | 2 | 0 | 2 |  |
| <u>AGK</u>     | 2 | 0 | 2 |  |
| <u>AHCY</u>    | 2 | 2 | 0 |  |
| AHCYL2         | 2 | 2 | 0 |  |
| <u>AHNAK</u>   | 2 | 0 | 2 |  |
| <u>AIMP2</u>   | 2 | 0 | 2 |  |
| <u>AK2</u>     | 2 | 0 | 2 |  |
| <u>AKAP13</u>  | 2 | 2 | 0 |  |
| <u>AKAP8L</u>  | 2 | 2 | 0 |  |
| <u>AKAP9</u>   | 2 | 2 | 0 |  |
| <u>AKRIC3</u>  | 2 | 0 | 2 |  |
| <u>AKTIP</u>   | 2 | 0 | 2 |  |
| <u>ALDH1L1</u> | 2 | 0 | 2 |  |
| <u>ALG3</u>    | 2 | 0 | 2 |  |
| <u>ALOX15B</u> | 2 | 2 | 0 |  |
| <u>ALPP</u>    | 2 | 2 | 0 |  |

|                  |   |   |   |  |
|------------------|---|---|---|--|
| <u>AMACR</u>     | 2 | 2 | 0 |  |
| <u>AMD1</u>      | 2 | 2 | 0 |  |
| <u>ANAPC5</u>    | 2 | 0 | 2 |  |
| <u>ANKLE2</u>    | 2 | 0 | 2 |  |
| <u>ANKRD17</u>   | 2 | 2 | 0 |  |
| <u>ANXA1</u>     | 2 | 0 | 2 |  |
| <u>AP3M2</u>     | 2 | 0 | 2 |  |
| <u>APOL2</u>     | 2 | 0 | 2 |  |
| <u>APOOL</u>     | 2 | 0 | 2 |  |
| <u>AQP3</u>      | 2 | 0 | 2 |  |
| <u>AQR</u>       | 2 | 0 | 2 |  |
| <u>ARFGEF2</u>   | 2 | 2 | 0 |  |
| <u>ARG2</u>      | 2 | 2 | 0 |  |
| <u>ARHGAP35</u>  | 2 | 2 | 0 |  |
| <u>ARHGDIA</u>   | 2 | 0 | 2 |  |
| <u>ARHGEF1</u>   | 2 | 2 | 0 |  |
| <u>ARHGEF2</u>   | 2 | 0 | 2 |  |
| <u>ARID3A</u>    | 2 | 2 | 0 |  |
| <u>ARNT</u>      | 2 | 2 | 0 |  |
| <u>ASAH1</u>     | 2 | 0 | 2 |  |
| <u>ASAP1-IT1</u> | 2 | 0 | 2 |  |
| <u>ASH1L</u>     | 2 | 2 | 0 |  |
| <u>ASH2L</u>     | 2 | 0 | 2 |  |
| <u>ASS1</u>      | 2 | 2 | 0 |  |
| <u>ASTN2</u>     | 2 | 0 | 2 |  |
| <u>ATAD2</u>     | 2 | 2 | 0 |  |
| <u>ATF3</u>      | 2 | 0 | 2 |  |
| <u>ATF6</u>      | 2 | 2 | 0 |  |
| <u>ATF7IP</u>    | 2 | 2 | 0 |  |
| <u>ATG12</u>     | 2 | 2 | 0 |  |
| <u>ATP1B1</u>    | 2 | 2 | 0 |  |
| <u>ATP2A2</u>    | 2 | 0 | 2 |  |
| <u>ATP2B4</u>    | 2 | 2 | 0 |  |
| <u>ATP6V0C</u>   | 2 | 2 | 0 |  |
| <u>ATP6V1D</u>   | 2 | 2 | 0 |  |
| <u>ATP9B</u>     | 2 | 2 | 0 |  |
| <u>ATR</u>       | 2 | 0 | 2 |  |
| <u>ATRX</u>      | 2 | 2 | 0 |  |
| <u>ATXN1</u>     | 2 | 0 | 2 |  |
| <u>ATXN7</u>     | 2 | 2 | 0 |  |
| <u>AURKB</u>     | 2 | 2 | 0 |  |
| <u>AVL9</u>      | 2 | 0 | 2 |  |
| <u>B4GALT3</u>   | 2 | 2 | 0 |  |
| <u>BACE2</u>     | 2 | 0 | 2 |  |
| <u>BAG3</u>      | 2 | 0 | 2 |  |
| <u>BANP</u>      | 2 | 2 | 0 |  |
| <u>BAP1</u>      | 2 | 0 | 2 |  |
| <u>BAX</u>       | 2 | 2 | 0 |  |

|                 |   |   |   |  |
|-----------------|---|---|---|--|
| <u>BAZ2A</u>    | 2 | 2 | 0 |  |
| <u>BAZ2B</u>    | 2 | 2 | 0 |  |
| <u>BBS10</u>    | 2 | 0 | 2 |  |
| <u>BCL2L1</u>   | 2 | 0 | 2 |  |
| <u>BCS1L</u>    | 2 | 0 | 2 |  |
| <u>BICD2</u>    | 2 | 0 | 2 |  |
| <u>BIK</u>      | 2 | 2 | 0 |  |
| <u>BNIP2</u>    | 2 | 2 | 0 |  |
| <u>BPTF</u>     | 2 | 2 | 0 |  |
| <u>BRCA1</u>    | 2 | 0 | 2 |  |
| <u>BRD7</u>     | 2 | 0 | 2 |  |
| <u>BUB1</u>     | 2 | 2 | 0 |  |
| <u>BZW1</u>     | 2 | 2 | 0 |  |
| <u>C10ORF95</u> | 2 | 0 | 2 |  |
| <u>C12ORF10</u> | 2 | 0 | 2 |  |
| <u>C12ORF41</u> | 2 | 0 | 2 |  |
| <u>C12ORF52</u> | 2 | 0 | 2 |  |
| <u>C15ORF29</u> | 2 | 0 | 2 |  |
| <u>C19ORF80</u> | 2 | 2 | 0 |  |
| <u>C1ORF115</u> | 2 | 2 | 0 |  |
| <u>C2</u>       | 2 | 2 | 0 |  |
| <u>C20ORF11</u> | 2 | 2 | 0 |  |
| <u>C20ORF30</u> | 2 | 2 | 0 |  |
| <u>C2CD2</u>    | 2 | 0 | 2 |  |
| <u>C6ORF47</u>  | 2 | 0 | 2 |  |
| <u>C6ORF48</u>  | 2 | 0 | 2 |  |
| <u>C7ORF68</u>  | 2 | 2 | 0 |  |
| <u>C9ORF40</u>  | 2 | 0 | 2 |  |
| <u>CACNB3</u>   | 2 | 0 | 2 |  |
| <u>CACYBP</u>   | 2 | 0 | 2 |  |
| <u>CAD</u>      | 2 | 0 | 2 |  |
| <u>CALM1</u>    | 2 | 2 | 0 |  |
| <u>CAND1</u>    | 2 | 0 | 2 |  |
| <u>CARS</u>     | 2 | 0 | 2 |  |
| <u>CASP3</u>    | 2 | 2 | 0 |  |
| <u>CASP8</u>    | 2 | 0 | 2 |  |
| <u>CAV1</u>     | 2 | 0 | 2 |  |
| <u>CBFA2T2</u>  | 2 | 2 | 0 |  |
| <u>CBL</u>      | 2 | 2 | 0 |  |
| <u>CBLB</u>     | 2 | 2 | 0 |  |
| <u>CBLL1</u>    | 2 | 2 | 0 |  |
| <u>CBX7</u>     | 2 | 0 | 2 |  |
| <u>CBY1</u>     | 2 | 0 | 2 |  |
| <u>CC2D1A</u>   | 2 | 2 | 0 |  |
| <u>CCDC101</u>  | 2 | 0 | 2 |  |
| <u>CCDC59</u>   | 2 | 0 | 2 |  |
| <u>CCDC85C</u>  | 2 | 0 | 2 |  |
| <u>CCNE</u>     | 2 | 0 | 2 |  |

|               |   |   |   |  |
|---------------|---|---|---|--|
| <u>CCNJ</u>   | 2 | 0 | 2 |  |
| <u>CCNL1</u>  | 2 | 2 | 0 |  |
| <u>CCNT2</u>  | 2 | 2 | 0 |  |
| <u>CD1C</u>   | 2 | 0 | 2 |  |
| <u>CD38</u>   | 2 | 2 | 0 |  |
| <u>CD3EAP</u> | 2 | 0 | 2 |  |
| <u>CD44</u>   | 2 | 0 | 2 |  |
| <u>CD47</u>   | 2 | 2 | 0 |  |
| <u>CD79B</u>  | 2 | 2 | 0 |  |
| <u>CD83</u>   | 2 | 2 | 0 |  |
| <u>CDC20</u>  | 2 | 2 | 0 |  |
| <u>CDC7</u>   | 2 | 0 | 2 |  |
| <u>CDH15</u>  | 2 | 2 | 0 |  |
| <u>CDH5</u>   | 2 | 2 | 0 |  |
| <u>CDK12</u>  | 2 | 2 | 0 |  |
| <u>CDK4</u>   | 2 | 0 | 2 |  |
| <u>CDK5R1</u> | 2 | 2 | 0 |  |
| <u>CDK9</u>   | 2 | 2 | 0 |  |
| <u>CDS1</u>   | 2 | 2 | 0 |  |
| <u>CEBPG</u>  | 2 | 0 | 2 |  |
| <u>CENPA</u>  | 2 | 2 | 0 |  |
| <u>CEP152</u> | 2 | 2 | 0 |  |
| <u>CERS2</u>  | 2 | 2 | 0 |  |
| <u>CERS4</u>  | 2 | 0 | 2 |  |
| <u>CES3</u>   | 2 | 0 | 2 |  |
| <u>CETN3</u>  | 2 | 0 | 2 |  |
| <u>CHD1</u>   | 2 | 2 | 0 |  |
| <u>CHD3</u>   | 2 | 2 | 0 |  |
| <u>CHGB</u>   | 2 | 2 | 0 |  |
| <u>CHI3L2</u> | 2 | 2 | 0 |  |
| <u>CHIC2</u>  | 2 | 2 | 0 |  |
| <u>CHMP1A</u> | 2 | 0 | 2 |  |
| <u>CHPT1</u>  | 2 | 0 | 2 |  |
| <u>CHRNE</u>  | 2 | 2 | 0 |  |
| <u>CHST10</u> | 2 | 0 | 2 |  |
| <u>CIAO1</u>  | 2 | 0 | 2 |  |
| <u>CIITA</u>  | 2 | 2 | 0 |  |
| <u>CISD1</u>  | 2 | 2 | 0 |  |
| <u>CKAP5</u>  | 2 | 0 | 2 |  |
| <u>CKS2</u>   | 2 | 2 | 0 |  |
| <u>CLCN2</u>  | 2 | 0 | 2 |  |
| <u>CLDN15</u> | 2 | 2 | 0 |  |
| <u>CLDN4</u>  | 2 | 0 | 2 |  |
| <u>CLDN9</u>  | 2 | 2 | 0 |  |
| <u>CLEC3B</u> | 2 | 0 | 2 |  |
| <u>CLIP1</u>  | 2 | 2 | 0 |  |
| <u>CLP1</u>   | 2 | 0 | 2 |  |
| <u>CNDP2</u>  | 2 | 2 | 0 |  |

|                |   |   |   |  |
|----------------|---|---|---|--|
| <u>CNOT4</u>   | 2 | 2 | 0 |  |
| <u>COASY</u>   | 2 | 0 | 2 |  |
| <u>COBL</u>    | 2 | 0 | 2 |  |
| <u>COG4</u>    | 2 | 0 | 2 |  |
| <u>COMMD3</u>  | 2 | 0 | 2 |  |
| <u>COMT</u>    | 2 | 0 | 2 |  |
| <u>CORO1C</u>  | 2 | 2 | 0 |  |
| <u>COX4I1</u>  | 2 | 0 | 2 |  |
| <u>COX7A1</u>  | 2 | 0 | 2 |  |
| <u>CPA1</u>    | 2 | 2 | 0 |  |
| <u>CPNE1</u>   | 2 | 2 | 0 |  |
| <u>CPNE3</u>   | 2 | 2 | 0 |  |
| <u>CPS1</u>    | 2 | 0 | 2 |  |
| <u>CPSF4</u>   | 2 | 0 | 2 |  |
| <u>CPSF6</u>   | 2 | 0 | 2 |  |
| <u>CPT2</u>    | 2 | 0 | 2 |  |
| <u>CREB3L1</u> | 2 | 2 | 0 |  |
| <u>CRIP1</u>   | 2 | 0 | 2 |  |
| <u>CRLF3</u>   | 2 | 0 | 2 |  |
| <u>CRP</u>     | 2 | 2 | 0 |  |
| <u>CRYZL1</u>  | 2 | 0 | 2 |  |
| <u>CSE1L</u>   | 2 | 0 | 2 |  |
| <u>CSF1</u>    | 2 | 2 | 0 |  |
| <u>CSF2RB</u>  | 2 | 2 | 0 |  |
| <u>CSK</u>     | 2 | 0 | 2 |  |
| <u>CSN3</u>    | 2 | 2 | 0 |  |
| <u>CST3</u>    | 2 | 0 | 2 |  |
| <u>CTCF</u>    | 2 | 0 | 2 |  |
| <u>CTSE</u>    | 2 | 0 | 2 |  |
| <u>CUL4A</u>   | 2 | 0 | 2 |  |
| <u>CUL4B</u>   | 2 | 2 | 0 |  |
| <u>CUL5</u>    | 2 | 0 | 2 |  |
| <u>CUTC</u>    | 2 | 0 | 2 |  |
| <u>CYB5R2</u>  | 2 | 0 | 2 |  |
| <u>CYP19A1</u> | 2 | 0 | 2 |  |
| <u>CYP11A1</u> | 2 | 0 | 2 |  |
| <u>CYP11B1</u> | 2 | 0 | 2 |  |
| <u>CYP24A1</u> | 2 | 2 | 0 |  |
| <u>CYP2B6</u>  | 2 | 2 | 0 |  |
| <u>CYP2C19</u> | 2 | 2 | 0 |  |
| <u>CYP3A4</u>  | 2 | 2 | 0 |  |
| <u>CYP4F8</u>  | 2 | 2 | 0 |  |
| <u>DAXX</u>    | 2 | 0 | 2 |  |
| <u>DCAF11</u>  | 2 | 2 | 0 |  |
| <u>DCP2</u>    | 2 | 0 | 2 |  |
| <u>DDAH2</u>   | 2 | 0 | 2 |  |
| <u>DDB2</u>    | 2 | 0 | 2 |  |
| <u>DDR1</u>    | 2 | 2 | 0 |  |

|                  |   |   |   |  |
|------------------|---|---|---|--|
| <u>DDRGK1</u>    | 2 | 0 | 2 |  |
| <u>DDX1</u>      | 2 | 0 | 2 |  |
| <u>DDX19A</u>    | 2 | 0 | 2 |  |
| <u>DDX23</u>     | 2 | 0 | 2 |  |
| <u>DDX3X</u>     | 2 | 2 | 0 |  |
| <u>DDX50</u>     | 2 | 0 | 2 |  |
| <u>DECR1</u>     | 2 | 0 | 2 |  |
| <u>DENND1B</u>   | 2 | 2 | 0 |  |
| <u>DENND5B</u>   | 2 | 0 | 2 |  |
| <u>DERL1</u>     | 2 | 0 | 2 |  |
| <u>DFFB</u>      | 2 | 0 | 2 |  |
| <u>DHRS7B</u>    | 2 | 0 | 2 |  |
| <u>DHRS9</u>     | 2 | 0 | 2 |  |
| <u>DHX30</u>     | 2 | 0 | 2 |  |
| <u>DIEXF</u>     | 2 | 0 | 2 |  |
| <u>DIO1</u>      | 2 | 0 | 2 |  |
| <u>DIS3</u>      | 2 | 0 | 2 |  |
| <u>DLG3</u>      | 2 | 2 | 0 |  |
| <u>DLGAP4</u>    | 2 | 2 | 0 |  |
| <u>DLGAP5</u>    | 2 | 2 | 0 |  |
| <u>DLX4</u>      | 2 | 2 | 0 |  |
| <u>DMPK</u>      | 2 | 2 | 0 |  |
| <u>DMXL2</u>     | 2 | 2 | 0 |  |
| <u>DNAJB14</u>   | 2 | 2 | 0 |  |
| <u>DNAJC24</u>   | 2 | 0 | 2 |  |
| <u>DNASE1L1</u>  | 2 | 0 | 2 |  |
| <u>DNMT1</u>     | 2 | 0 | 2 |  |
| <u>DNMT3B</u>    | 2 | 0 | 2 |  |
| <u>DNPEP</u>     | 2 | 0 | 2 |  |
| <u>DOPEY1</u>    | 2 | 2 | 0 |  |
| <u>DPH2</u>      | 2 | 0 | 2 |  |
| <u>DPY19L2P2</u> | 2 | 2 | 0 |  |
| <u>DPYSL2</u>    | 2 | 0 | 2 |  |
| <u>DPYSL4</u>    | 2 | 2 | 0 |  |
| <u>DR1</u>       | 2 | 2 | 0 |  |
| <u>DRG1</u>      | 2 | 0 | 2 |  |
| <u>DROSHA</u>    | 2 | 0 | 2 |  |
| <u>DSG2</u>      | 2 | 0 | 2 |  |
| <u>DSN1</u>      | 2 | 0 | 2 |  |
| <u>DTWD1</u>     | 2 | 0 | 2 |  |
| <u>DUS4L</u>     | 2 | 0 | 2 |  |
| <u>DUSP1</u>     | 2 | 2 | 0 |  |
| <u>DYNC1H1</u>   | 2 | 0 | 2 |  |
| <u>DYNC2LI1</u>  | 2 | 0 | 2 |  |
| <u>DYSF</u>      | 2 | 2 | 0 |  |
| <u>E2F3</u>      | 2 | 2 | 0 |  |
| <u>EAPP</u>      | 2 | 0 | 2 |  |
| <u>ECM1</u>      | 2 | 2 | 0 |  |

|                 |   |   |   |  |
|-----------------|---|---|---|--|
| <u>EDNRA</u>    | 2 | 2 | 0 |  |
| <u>EEA1</u>     | 2 | 2 | 0 |  |
| <u>EFNA1</u>    | 2 | 2 | 0 |  |
| <u>EHBP1</u>    | 2 | 0 | 2 |  |
| <u>EHD3</u>     | 2 | 0 | 2 |  |
| <u>EHHADH</u>   | 2 | 0 | 2 |  |
| <u>EID1</u>     | 2 | 0 | 2 |  |
| <u>EIF1B</u>    | 2 | 2 | 0 |  |
| <u>EIF2AK3</u>  | 2 | 2 | 0 |  |
| <u>EIF2B1</u>   | 2 | 0 | 2 |  |
| <u>EIF2S2</u>   | 2 | 0 | 2 |  |
| <u>EIF3E</u>    | 2 | 2 | 0 |  |
| <u>EIF4A3</u>   | 2 | 2 | 0 |  |
| <u>EIF4H</u>    | 2 | 0 | 2 |  |
| <u>ELK1</u>     | 2 | 2 | 0 |  |
| <u>ELL</u>      | 2 | 2 | 0 |  |
| <u>EPAS1</u>    | 2 | 2 | 0 |  |
| <u>EPHA2</u>    | 2 | 0 | 2 |  |
| <u>EPHA4</u>    | 2 | 2 | 0 |  |
| <u>EPRS</u>     | 2 | 0 | 2 |  |
| <u>ERBB3</u>    | 2 | 2 | 0 |  |
| <u>ERC1</u>     | 2 | 2 | 0 |  |
| <u>ERCC5</u>    | 2 | 0 | 2 |  |
| <u>ESRP2</u>    | 2 | 2 | 0 |  |
| <u>ETFDH</u>    | 2 | 0 | 2 |  |
| <u>ETNK2</u>    | 2 | 0 | 2 |  |
| <u>EXOC1</u>    | 2 | 0 | 2 |  |
| <u>EXOC7</u>    | 2 | 2 | 0 |  |
| <u>EXOSC10</u>  | 2 | 0 | 2 |  |
| <u>F7</u>       | 2 | 2 | 0 |  |
| <u>FAIM</u>     | 2 | 0 | 2 |  |
| <u>FAM114A2</u> | 2 | 0 | 2 |  |
| <u>FAM127B</u>  | 2 | 0 | 2 |  |
| <u>FAM134B</u>  | 2 | 0 | 2 |  |
| <u>FAM13B</u>   | 2 | 2 | 0 |  |
| <u>FAM164A</u>  | 2 | 0 | 2 |  |
| <u>FAM168B</u>  | 2 | 2 | 0 |  |
| <u>FAM192A</u>  | 2 | 0 | 2 |  |
| <u>FAM20B</u>   | 2 | 0 | 2 |  |
| <u>FAM55C</u>   | 2 | 0 | 2 |  |
| <u>FARSA</u>    | 2 | 0 | 2 |  |
| <u>FAS</u>      | 2 | 0 | 2 |  |
| <u>FBL</u>      | 2 | 2 | 0 |  |
| <u>FBXL14</u>   | 2 | 0 | 2 |  |
| <u>FBXL6</u>    | 2 | 2 | 0 |  |
| <u>FBXO28</u>   | 2 | 2 | 0 |  |
| <u>FBXO5</u>    | 2 | 2 | 0 |  |
| <u>FBXO9</u>    | 2 | 0 | 2 |  |

|                |   |   |   |  |
|----------------|---|---|---|--|
| <u>FBXW2</u>   | 2 | 0 | 2 |  |
| <u>FCHO1</u>   | 2 | 0 | 2 |  |
| <u>FECH</u>    | 2 | 0 | 2 |  |
| <u>FGF9</u>    | 2 | 2 | 0 |  |
| <u>FGFR1OP</u> | 2 | 2 | 0 |  |
| <u>FHL2</u>    | 2 | 2 | 0 |  |
| <u>FICD</u>    | 2 | 0 | 2 |  |
| <u>FIP1L1</u>  | 2 | 2 | 0 |  |
| <u>FKBP4</u>   | 2 | 2 | 0 |  |
| <u>FKSG49</u>  | 2 | 0 | 2 |  |
| <u>FLT3</u>    | 2 | 0 | 2 |  |
| <u>FN1</u>     | 2 | 2 | 0 |  |
| <u>FNDC3A</u>  | 2 | 0 | 2 |  |
| <u>FOXN3</u>   | 2 | 0 | 2 |  |
| <u>FRMD4B</u>  | 2 | 2 | 0 |  |
| <u>FSCN1</u>   | 2 | 2 | 0 |  |
| <u>FSTL1</u>   | 2 | 2 | 0 |  |
| <u>FTSJ2</u>   | 2 | 0 | 2 |  |
| <u>FTSJ3</u>   | 2 | 0 | 2 |  |
| <u>FUCA1</u>   | 2 | 0 | 2 |  |
| <u>FUT1</u>    | 2 | 2 | 0 |  |
| <u>FUT6</u>    | 2 | 2 | 0 |  |
| <u>FXN</u>     | 2 | 0 | 2 |  |
| <u>FXYD3</u>   | 2 | 0 | 2 |  |
| <u>FXYD7</u>   | 2 | 0 | 2 |  |
| <u>FZD7</u>    | 2 | 0 | 2 |  |
| <u>GADD45B</u> | 2 | 2 | 0 |  |
| <u>GAL</u>     | 2 | 2 | 0 |  |
| <u>GALNT14</u> | 2 | 0 | 2 |  |
| <u>GAN</u>     | 2 | 2 | 0 |  |
| <u>GAPDH</u>   | 2 | 0 | 2 |  |
| <u>GAPVD1</u>  | 2 | 2 | 0 |  |
| <u>GATA4</u>   | 2 | 0 | 2 |  |
| <u>GATA6</u>   | 2 | 2 | 0 |  |
| <u>GBP1</u>    | 2 | 2 | 0 |  |
| <u>GCLM</u>    | 2 | 0 | 2 |  |
| <u>GCN1L1</u>  | 2 | 0 | 2 |  |
| <u>GEMIN4</u>  | 2 | 0 | 2 |  |
| <u>GFAP</u>    | 2 | 0 | 2 |  |
| <u>GFPT2</u>   | 2 | 2 | 0 |  |
| <u>GGA3</u>    | 2 | 2 | 0 |  |
| <u>GGPS1</u>   | 2 | 0 | 2 |  |
| <u>GIGYF2</u>  | 2 | 2 | 0 |  |
| <u>GK</u>      | 2 | 0 | 2 |  |
| <u>GLT8D1</u>  | 2 | 0 | 2 |  |
| <u>GLUL</u>    | 2 | 2 | 0 |  |
| <u>GMCL1</u>   | 2 | 0 | 2 |  |
| <u>GMEB1</u>   | 2 | 2 | 0 |  |

|                 |   |   |   |  |
|-----------------|---|---|---|--|
| <u>GMNN</u>     | 2 | 2 | 0 |  |
| <u>GNAQ</u>     | 2 | 0 | 2 |  |
| <u>GOLGA3</u>   | 2 | 0 | 2 |  |
| <u>GOLGA4</u>   | 2 | 2 | 0 |  |
| <u>GOLGA5</u>   | 2 | 0 | 2 |  |
| <u>GOLIM4</u>   | 2 | 0 | 2 |  |
| <u>GPATCH1</u>  | 2 | 2 | 0 |  |
| <u>GPC1</u>     | 2 | 2 | 0 |  |
| <u>GPN2</u>     | 2 | 2 | 0 |  |
| <u>GPR143</u>   | 2 | 0 | 2 |  |
| <u>GPRC5A</u>   | 2 | 0 | 2 |  |
| <u>GPX1</u>     | 2 | 2 | 0 |  |
| <u>GRAMD4</u>   | 2 | 0 | 2 |  |
| <u>GRB7</u>     | 2 | 2 | 0 |  |
| <u>GSK3B</u>    | 2 | 2 | 0 |  |
| <u>GSN</u>      | 2 | 0 | 2 |  |
| <u>GSTT1</u>    | 2 | 2 | 0 |  |
| <u>GTF2B</u>    | 2 | 2 | 0 |  |
| <u>GTF2E1</u>   | 2 | 0 | 2 |  |
| <u>GTF2IRD1</u> | 2 | 0 | 2 |  |
| <u>GTF3A</u>    | 2 | 0 | 2 |  |
| <u>GTPBP3</u>   | 2 | 0 | 2 |  |
| <u>GTSE1</u>    | 2 | 0 | 2 |  |
| <u>H2AFZ</u>    | 2 | 2 | 0 |  |
| <u>H6PD</u>     | 2 | 2 | 0 |  |
| <u>HADHA</u>    | 2 | 0 | 2 |  |
| <u>HADHB</u>    | 2 | 0 | 2 |  |
| <u>HAT1</u>     | 2 | 0 | 2 |  |
| <u>HBP1</u>     | 2 | 2 | 0 |  |
| <u>HCP5</u>     | 2 | 0 | 2 |  |
| <u>HDAC7</u>    | 2 | 0 | 2 |  |
| <u>HDDC2</u>    | 2 | 0 | 2 |  |
| <u>HDLBP</u>    | 2 | 0 | 2 |  |
| <u>HEATR2</u>   | 2 | 2 | 0 |  |
| <u>HEATR3</u>   | 2 | 0 | 2 |  |
| <u>HEATR6</u>   | 2 | 0 | 2 |  |
| <u>HEBP2</u>    | 2 | 2 | 0 |  |
| <u>HECTD3</u>   | 2 | 0 | 2 |  |
| <u>HEG1</u>     | 2 | 2 | 0 |  |
| <u>HERC6</u>    | 2 | 0 | 2 |  |
| <u>HES2</u>     | 2 | 2 | 0 |  |
| <u>HEXA</u>     | 2 | 2 | 0 |  |
| <u>HFE</u>      | 2 | 2 | 0 |  |
| <u>HIC2</u>     | 2 | 2 | 0 |  |
| <u>HIP1</u>     | 2 | 0 | 2 |  |
| <u>HIPK1</u>    | 2 | 2 | 0 |  |
| <u>HIST1H1B</u> | 2 | 2 | 0 |  |
| <u>HIST1H1D</u> | 2 | 2 | 0 |  |

|                  |   |   |   |  |
|------------------|---|---|---|--|
| <u>HIST1H1E</u>  | 2 | 2 | 0 |  |
| <u>HIST1H1T</u>  | 2 | 2 | 0 |  |
| <u>HIST1H2AI</u> | 2 | 2 | 0 |  |
| <u>HIST1H2AM</u> | 2 | 2 | 0 |  |
| <u>HIST1H2BK</u> | 2 | 2 | 0 |  |
| <u>HIST1H2BN</u> | 2 | 2 | 0 |  |
| <u>HIST1H2BO</u> | 2 | 2 | 0 |  |
| <u>HIST1H3E</u>  | 2 | 2 | 0 |  |
| <u>HIST1H3F</u>  | 2 | 2 | 0 |  |
| <u>HIST1H3G</u>  | 2 | 2 | 0 |  |
| <u>HIST1H4D</u>  | 2 | 2 | 0 |  |
| <u>HIST1H4E</u>  | 2 | 2 | 0 |  |
| <u>HIST1H4H</u>  | 2 | 2 | 0 |  |
| <u>HIST2H2BE</u> | 2 | 2 | 0 |  |
| <u>HK2</u>       | 2 | 0 | 2 |  |
| <u>HLA-DOB</u>   | 2 | 0 | 2 |  |
| <u>HLA-DQB1</u>  | 2 | 2 | 0 |  |
| <u>HMGB2</u>     | 2 | 2 | 0 |  |
| <u>HMGCS1</u>    | 2 | 2 | 0 |  |
| <u>HMGN4</u>     | 2 | 0 | 2 |  |
| <u>HMOX1</u>     | 2 | 2 | 0 |  |
| <u>HNRNPA0</u>   | 2 | 2 | 0 |  |
| <u>HOXB13</u>    | 2 | 2 | 0 |  |
| <u>HPS5</u>      | 2 | 0 | 2 |  |
| <u>HSD17B7</u>   | 2 | 2 | 0 |  |
| <u>HSDL2</u>     | 2 | 0 | 2 |  |
| <u>HSF2</u>      | 2 | 2 | 0 |  |
| <u>HUS1</u>      | 2 | 2 | 0 |  |
| <u>IDE</u>       | 2 | 0 | 2 |  |
| <u>IDH2</u>      | 2 | 2 | 0 |  |
| <u>IDS</u>       | 2 | 2 | 0 |  |
| <u>IER3IP1</u>   | 2 | 0 | 2 |  |
| <u>IER5</u>      | 2 | 2 | 0 |  |
| <u>IFI30</u>     | 2 | 0 | 2 |  |
| <u>IFI44L</u>    | 2 | 2 | 0 |  |
| <u>IFITM3</u>    | 2 | 0 | 2 |  |
| <u>IFNAR2</u>    | 2 | 0 | 2 |  |
| <u>IFRD1</u>     | 2 | 0 | 2 |  |
| <u>IFT46</u>     | 2 | 0 | 2 |  |
| <u>IGF1R</u>     | 2 | 2 | 0 |  |
| <u>IGFBP2</u>    | 2 | 2 | 0 |  |
| <u>IKBKB</u>     | 2 | 0 | 2 |  |
| <u>IL12B</u>     | 2 | 2 | 0 |  |
| <u>IL13RA1</u>   | 2 | 2 | 0 |  |
| <u>IL13RA2</u>   | 2 | 2 | 0 |  |
| <u>IL1RN</u>     | 2 | 2 | 0 |  |
| <u>IL32</u>      | 2 | 2 | 0 |  |
| <u>IL36G</u>     | 2 | 2 | 0 |  |

|                  |   |   |   |  |
|------------------|---|---|---|--|
| <u>IMPACT</u>    | 2 | 0 | 2 |  |
| <u>INADL</u>     | 2 | 2 | 0 |  |
| <u>ING3</u>      | 2 | 2 | 0 |  |
| <u>INHBB</u>     | 2 | 0 | 2 |  |
| <u>INO80B</u>    | 2 | 0 | 2 |  |
| <u>INPP5F</u>    | 2 | 0 | 2 |  |
| <u>INSIG1</u>    | 2 | 2 | 0 |  |
| <u>INSR</u>      | 2 | 2 | 0 |  |
| <u>IP6K1</u>     | 2 | 2 | 0 |  |
| <u>IP6K2</u>     | 2 | 2 | 0 |  |
| <u>IPO13</u>     | 2 | 2 | 0 |  |
| <u>IPO5</u>      | 2 | 0 | 2 |  |
| <u>IPP</u>       | 2 | 0 | 2 |  |
| <u>IQCE</u>      | 2 | 0 | 2 |  |
| <u>IRF5</u>      | 2 | 0 | 2 |  |
| <u>IRF7</u>      | 2 | 2 | 0 |  |
| <u>IRS1</u>      | 2 | 0 | 2 |  |
| <u>ISOC2</u>     | 2 | 0 | 2 |  |
| <u>ITGA10</u>    | 2 | 0 | 2 |  |
| <u>ITGA5</u>     | 2 | 0 | 2 |  |
| <u>ITM2B</u>     | 2 | 2 | 0 |  |
| <u>JUP</u>       | 2 | 0 | 2 |  |
| <u>KARS</u>      | 2 | 0 | 2 |  |
| <u>KAT6A</u>     | 2 | 2 | 0 |  |
| <u>KAT8</u>      | 2 | 0 | 2 |  |
| <u>KATNB1</u>    | 2 | 0 | 2 |  |
| <u>KBTBD2</u>    | 2 | 2 | 0 |  |
| <u>KCNF1</u>     | 2 | 0 | 2 |  |
| <u>KCNG1</u>     | 2 | 0 | 2 |  |
| <u>KDELR2</u>    | 2 | 0 | 2 |  |
| <u>KDM4C</u>     | 2 | 2 | 0 |  |
| <u>KDM5B</u>     | 2 | 2 | 0 |  |
| <u>KDM6A</u>     | 2 | 2 | 0 |  |
| <u>KDM6B</u>     | 2 | 2 | 0 |  |
| <u>KIAA0100</u>  | 2 | 0 | 2 |  |
| <u>KIAA0247</u>  | 2 | 2 | 0 |  |
| <u>KIAA0895</u>  | 2 | 2 | 0 |  |
| <u>KIAA1279</u>  | 2 | 0 | 2 |  |
| <u>KIDINS220</u> | 2 | 2 | 0 |  |
| <u>KLHDC3</u>    | 2 | 0 | 2 |  |
| <u>KLHL21</u>    | 2 | 0 | 2 |  |
| <u>KLHL24</u>    | 2 | 2 | 0 |  |
| <u>KLK13</u>     | 2 | 2 | 0 |  |
| <u>KLK5</u>      | 2 | 2 | 0 |  |
| <u>KNG1</u>      | 2 | 0 | 2 |  |
| <u>KRT81</u>     | 2 | 2 | 0 |  |
| <u>LACTB2</u>    | 2 | 0 | 2 |  |
| <u>LAP3</u>      | 2 | 2 | 0 |  |

|                 |   |   |   |  |
|-----------------|---|---|---|--|
| <u>LBR</u>      | 2 | 0 | 2 |  |
| <u>LCMT1</u>    | 2 | 0 | 2 |  |
| <u>LEF1</u>     | 2 | 2 | 0 |  |
| <u>LGR4</u>     | 2 | 0 | 2 |  |
| <u>LGR5</u>     | 2 | 2 | 0 |  |
| <u>LIFR</u>     | 2 | 2 | 0 |  |
| <u>LMF1</u>     | 2 | 2 | 0 |  |
| <u>LMO3</u>     | 2 | 2 | 0 |  |
| LOC100127972    | 2 | 0 | 2 |  |
| LOC100129361    | 2 | 0 | 2 |  |
| LOC283683       | 2 | 0 | 2 |  |
| LOC399491       | 2 | 2 | 0 |  |
| LOC81691        | 2 | 0 | 2 |  |
| <u>LPIN2</u>    | 2 | 2 | 0 |  |
| <u>LRIG1</u>    | 2 | 0 | 2 |  |
| <u>LRP5L</u>    | 2 | 2 | 0 |  |
| <u>LRRC31</u>   | 2 | 0 | 2 |  |
| <u>LSM3</u>     | 2 | 0 | 2 |  |
| <u>LUZP1</u>    | 2 | 0 | 2 |  |
| <u>LZTFL1</u>   | 2 | 0 | 2 |  |
| <u>MACF1</u>    | 2 | 0 | 2 |  |
| <u>MAD2L1</u>   | 2 | 2 | 0 |  |
| <u>MAGEA1</u>   | 2 | 0 | 2 |  |
| <u>MAK16</u>    | 2 | 0 | 2 |  |
| <u>MAP1LC3B</u> | 2 | 2 | 0 |  |
| <u>MAP2K4</u>   | 2 | 0 | 2 |  |
| <u>MAP3K14</u>  | 2 | 2 | 0 |  |
| <u>MAP4</u>     | 2 | 0 | 2 |  |
| <u>MAP4K2</u>   | 2 | 2 | 0 |  |
| <u>MAP4K4</u>   | 2 | 0 | 2 |  |
| <u>MAP6D1</u>   | 2 | 0 | 2 |  |
| <u>MAP7D1</u>   | 2 | 2 | 0 |  |
| <u>MAP7D3</u>   | 2 | 0 | 2 |  |
| <u>MAST3</u>    | 2 | 0 | 2 |  |
| <u>MAT2A</u>    | 2 | 0 | 2 |  |
| <u>MBL2</u>     | 2 | 2 | 0 |  |
| <u>MCM4</u>     | 2 | 2 | 0 |  |
| <u>MCM6</u>     | 2 | 2 | 0 |  |
| <u>MCM7</u>     | 2 | 2 | 0 |  |
| <u>MDM1</u>     | 2 | 0 | 2 |  |
| <u>MED6</u>     | 2 | 2 | 0 |  |
| <u>MED7</u>     | 2 | 0 | 2 |  |
| <u>MEGF9</u>    | 2 | 0 | 2 |  |
| <u>METTL13</u>  | 2 | 0 | 2 |  |
| METTL2B         | 2 | 0 | 2 |  |
| <u>METTL3</u>   | 2 | 0 | 2 |  |
| <u>METTL4</u>   | 2 | 0 | 2 |  |
| <u>MFAP3</u>    | 2 | 2 | 0 |  |

|                 |   |   |   |  |
|-----------------|---|---|---|--|
| <u>MFSD11</u>   | 2 | 0 | 2 |  |
| <u>MGAT4A</u>   | 2 | 2 | 0 |  |
| <u>MICALL1</u>  | 2 | 0 | 2 |  |
| <u>MICB</u>     | 2 | 2 | 0 |  |
| <u>MIOS</u>     | 2 | 2 | 0 |  |
| <u>MIS12</u>    | 2 | 2 | 0 |  |
| <u>MIS18A</u>   | 2 | 0 | 2 |  |
| <u>MKI67</u>    | 2 | 2 | 0 |  |
| <u>MMACHC</u>   | 2 | 0 | 2 |  |
| <u>MMADHC</u>   | 2 | 2 | 0 |  |
| <u>MORC2</u>    | 2 | 0 | 2 |  |
| <u>MPDU1</u>    | 2 | 2 | 0 |  |
| <u>MPHOSPH8</u> | 2 | 0 | 2 |  |
| <u>MPP2</u>     | 2 | 2 | 0 |  |
| <u>MPP5</u>     | 2 | 2 | 0 |  |
| <u>MPPE1</u>    | 2 | 0 | 2 |  |
| <u>MPRIP</u>    | 2 | 0 | 2 |  |
| <u>MPZL2</u>    | 2 | 2 | 0 |  |
| <u>MREG</u>     | 2 | 0 | 2 |  |
| <u>MRPL19</u>   | 2 | 0 | 2 |  |
| <u>MRPL2</u>    | 2 | 0 | 2 |  |
| <u>MRPL34</u>   | 2 | 0 | 2 |  |
| <u>MRPL39</u>   | 2 | 0 | 2 |  |
| <u>MRPL52</u>   | 2 | 0 | 2 |  |
| <u>MRPS18B</u>  | 2 | 0 | 2 |  |
| <u>MRPS28</u>   | 2 | 2 | 0 |  |
| <u>MSL3</u>     | 2 | 0 | 2 |  |
| <u>MST1</u>     | 2 | 0 | 2 |  |
| <u>MTF2</u>     | 2 | 2 | 0 |  |
| <u>MTMR2</u>    | 2 | 0 | 2 |  |
| <u>MUC5B</u>    | 2 | 2 | 0 |  |
| <u>MUTYH</u>    | 2 | 0 | 2 |  |
| <u>MVP</u>      | 2 | 2 | 0 |  |
| <u>MYBL2</u>    | 2 | 2 | 0 |  |
| <u>MYLK3</u>    | 2 | 0 | 2 |  |
| <u>N4BP2L1</u>  | 2 | 2 | 0 |  |
| <u>NAAA</u>     | 2 | 0 | 2 |  |
| <u>NAALAD2</u>  | 2 | 2 | 0 |  |
| <u>NAB1</u>     | 2 | 2 | 0 |  |
| <u>NAT1</u>     | 2 | 0 | 2 |  |
| <u>NBN</u>      | 2 | 0 | 2 |  |
| <u>NCAPD2</u>   | 2 | 2 | 0 |  |
| <u>NCLN</u>     | 2 | 2 | 0 |  |
| <u>NCOA3</u>    | 2 | 2 | 0 |  |
| <u>NDUFAF1</u>  | 2 | 0 | 2 |  |
| <u>NDUFAF4</u>  | 2 | 0 | 2 |  |
| <u>NDUFB11</u>  | 2 | 2 | 0 |  |
| <u>NDUFB2</u>   | 2 | 2 | 0 |  |

|               |   |   |   |  |
|---------------|---|---|---|--|
| <u>NDUFS6</u> | 2 | 2 | 0 |  |
| <u>NEK4</u>   | 2 | 0 | 2 |  |
| <u>NENF</u>   | 2 | 0 | 2 |  |
| <u>NFKB1</u>  | 2 | 0 | 2 |  |
| <u>NFKB2</u>  | 2 | 2 | 0 |  |
| <u>NFRKB</u>  | 2 | 2 | 0 |  |
| <u>NFYC</u>   | 2 | 2 | 0 |  |
| <u>NIPA2</u>  | 2 | 0 | 2 |  |
| <u>NIPBL</u>  | 2 | 2 | 0 |  |
| <u>NKX3-1</u> | 2 | 2 | 0 |  |
| <u>NLE1</u>   | 2 | 0 | 2 |  |
| <u>NOL8</u>   | 2 | 0 | 2 |  |
| <u>NPPB</u>   | 2 | 2 | 0 |  |
| <u>NR4A1</u>  | 2 | 2 | 0 |  |
| <u>NSUN5</u>  | 2 | 0 | 2 |  |
| <u>NTAN1</u>  | 2 | 0 | 2 |  |
| <u>NTRK2</u>  | 2 | 0 | 2 |  |
| <u>NUCB2</u>  | 2 | 2 | 0 |  |
| <u>NUDCD3</u> | 2 | 0 | 2 |  |
| <u>NUDT13</u> | 2 | 0 | 2 |  |
| <u>NUDT2</u>  | 2 | 0 | 2 |  |
| <u>NUP62</u>  | 2 | 0 | 2 |  |
| <u>NUPL2</u>  | 2 | 0 | 2 |  |
| <u>NUSAP1</u> | 2 | 2 | 0 |  |
| <u>ODF1</u>   | 2 | 0 | 2 |  |
| <u>OLFM1</u>  | 2 | 2 | 0 |  |
| <u>OPHN1</u>  | 2 | 0 | 2 |  |
| <u>OR2B6</u>  | 2 | 2 | 0 |  |
| <u>ORC2</u>   | 2 | 2 | 0 |  |
| <u>OSBP</u>   | 2 | 2 | 0 |  |
| <u>OVOL1</u>  | 2 | 2 | 0 |  |
| <u>OVOL2</u>  | 2 | 2 | 0 |  |
| <u>P2RY2</u>  | 2 | 0 | 2 |  |
| <u>PA2G4</u>  | 2 | 0 | 2 |  |
| <u>PALB2</u>  | 2 | 0 | 2 |  |
| <u>PALLD</u>  | 2 | 2 | 0 |  |
| <u>PAR6B</u>  | 2 | 2 | 0 |  |
| <u>PARG</u>   | 2 | 0 | 2 |  |
| <u>PBXIP1</u> | 2 | 2 | 0 |  |
| <u>PCM1</u>   | 2 | 0 | 2 |  |
| <u>PCNX</u>   | 2 | 2 | 0 |  |
| <u>PCYT1A</u> | 2 | 2 | 0 |  |
| <u>PCYT2</u>  | 2 | 0 | 2 |  |
| <u>PDCD5</u>  | 2 | 0 | 2 |  |
| <u>PDE8A</u>  | 2 | 0 | 2 |  |
| <u>PDGFD</u>  | 2 | 0 | 2 |  |
| <u>PDLIM2</u> | 2 | 2 | 0 |  |
| <u>PDP1</u>   | 2 | 2 | 0 |  |

|                 |   |   |   |  |
|-----------------|---|---|---|--|
| <u>PEA15</u>    | 2 | 2 | 0 |  |
| <u>PELP1</u>    | 2 | 0 | 2 |  |
| <u>PES1</u>     | 2 | 0 | 2 |  |
| <u>PEX10</u>    | 2 | 2 | 0 |  |
| <u>PEX14</u>    | 2 | 0 | 2 |  |
| <u>PFAS</u>     | 2 | 0 | 2 |  |
| <u>PFKM</u>     | 2 | 0 | 2 |  |
| <u>PGRMC2</u>   | 2 | 0 | 2 |  |
| <u>PHGDH</u>    | 2 | 0 | 2 |  |
| <u>PIBF1</u>    | 2 | 2 | 0 |  |
| <u>PIK3IP1</u>  | 2 | 2 | 0 |  |
| <u>PIK3R1</u>   | 2 | 0 | 2 |  |
| <u>PIN1</u>     | 2 | 0 | 2 |  |
| <u>PIP4K2A</u>  | 2 | 0 | 2 |  |
| <u>PIP5K1A</u>  | 2 | 2 | 0 |  |
| <u>PJA2</u>     | 2 | 2 | 0 |  |
| <u>PKN2</u>     | 2 | 2 | 0 |  |
| <u>PLAGL2</u>   | 2 | 2 | 0 |  |
| <u>PLAU</u>     | 2 | 2 | 0 |  |
| <u>PLCB3</u>    | 2 | 0 | 2 |  |
| <u>PLD3</u>     | 2 | 2 | 0 |  |
| <u>PLEKHA1</u>  | 2 | 0 | 2 |  |
| <u>PLEKHM1</u>  | 2 | 2 | 0 |  |
| <u>PLLP</u>     | 2 | 2 | 0 |  |
| <u>PLOD2</u>    | 2 | 2 | 0 |  |
| <u>PLOD3</u>    | 2 | 0 | 2 |  |
| <u>PLXNA1</u>   | 2 | 0 | 2 |  |
| <u>PMM2</u>     | 2 | 2 | 0 |  |
| <u>PMS2P1</u>   | 2 | 0 | 2 |  |
| <u>PNKP</u>     | 2 | 0 | 2 |  |
| <u>PNMA1</u>    | 2 | 0 | 2 |  |
| <u>PNMT</u>     | 2 | 2 | 0 |  |
| <u>POLA2</u>    | 2 | 0 | 2 |  |
| <u>POLB</u>     | 2 | 0 | 2 |  |
| <u>POLD3</u>    | 2 | 0 | 2 |  |
| <u>POLM</u>     | 2 | 2 | 0 |  |
| <u>POLR2I</u>   | 2 | 0 | 2 |  |
| <u>POP5</u>     | 2 | 0 | 2 |  |
| <u>POPDC3</u>   | 2 | 0 | 2 |  |
| <u>PPAN</u>     | 2 | 0 | 2 |  |
| <u>PPAP2A</u>   | 2 | 2 | 0 |  |
| <u>PPIE</u>     | 2 | 0 | 2 |  |
| <u>PPM1E</u>    | 2 | 2 | 0 |  |
| <u>PPP1CB</u>   | 2 | 2 | 0 |  |
| <u>PPP1R12B</u> | 2 | 2 | 0 |  |
| <u>PPP1R7</u>   | 2 | 0 | 2 |  |
| <u>PPP5C</u>    | 2 | 2 | 0 |  |
| <u>PRCP</u>     | 2 | 2 | 0 |  |

|                 |   |   |   |  |
|-----------------|---|---|---|--|
| <u>PRDM2</u>    | 2 | 2 | 0 |  |
| <u>PRDX4</u>    | 2 | 2 | 0 |  |
| <u>PRKAA1</u>   | 2 | 2 | 0 |  |
| <u>PRKD2</u>    | 2 | 2 | 0 |  |
| <u>PRMT3</u>    | 2 | 0 | 2 |  |
| <u>PRMT5</u>    | 2 | 0 | 2 |  |
| <u>PRPF4</u>    | 2 | 0 | 2 |  |
| <u>PRPS1</u>    | 2 | 2 | 0 |  |
| <u>PRRC1</u>    | 2 | 0 | 2 |  |
| <u>PRSS21</u>   | 2 | 2 | 0 |  |
| <u>PRSS22</u>   | 2 | 2 | 0 |  |
| <u>PRSS23</u>   | 2 | 0 | 2 |  |
| <u>PRSS8</u>    | 2 | 2 | 0 |  |
| <u>PSG9</u>     | 2 | 2 | 0 |  |
| <u>PSMA6</u>    | 2 | 2 | 0 |  |
| <u>PSMD2</u>    | 2 | 0 | 2 |  |
| <u>PSMD8</u>    | 2 | 2 | 0 |  |
| <u>PSMD9</u>    | 2 | 0 | 2 |  |
| <u>PSMG1</u>    | 2 | 0 | 2 |  |
| <u>PSMG2</u>    | 2 | 0 | 2 |  |
| <u>PSPH</u>     | 2 | 0 | 2 |  |
| <u>PTCH1</u>    | 2 | 2 | 0 |  |
| <u>PTGER3</u>   | 2 | 2 | 0 |  |
| <u>PTGIS</u>    | 2 | 2 | 0 |  |
| <u>PTP4A2</u>   | 2 | 0 | 2 |  |
| <u>PTPN21</u>   | 2 | 2 | 0 |  |
| <u>PTPRK</u>    | 2 | 2 | 0 |  |
| <u>PTS</u>      | 2 | 0 | 2 |  |
| <u>PUM1</u>     | 2 | 2 | 0 |  |
| <u>PUS1</u>     | 2 | 0 | 2 |  |
| <u>PXDN</u>     | 2 | 2 | 0 |  |
| <u>QKI</u>      | 2 | 2 | 0 |  |
| <u>QRICH1</u>   | 2 | 2 | 0 |  |
| <u>R3HCC1</u>   | 2 | 0 | 2 |  |
| <u>RAB23</u>    | 2 | 2 | 0 |  |
| <u>RAB27B</u>   | 2 | 0 | 2 |  |
| <u>RAB7A</u>    | 2 | 2 | 0 |  |
| <u>RABEP2</u>   | 2 | 0 | 2 |  |
| <u>RABIF</u>    | 2 | 0 | 2 |  |
| <u>RAI14</u>    | 2 | 2 | 0 |  |
| <u>RALGAPA1</u> | 2 | 2 | 0 |  |
| <u>RALGAPB</u>  | 2 | 0 | 2 |  |
| <u>RAN</u>      | 2 | 0 | 2 |  |
| <u>RARA</u>     | 2 | 2 | 0 |  |
| <u>RARS</u>     | 2 | 0 | 2 |  |
| <u>RASAL2</u>   | 2 | 2 | 0 |  |
| <u>RBBP5</u>    | 2 | 2 | 0 |  |
| <u>RBFA</u>     | 2 | 0 | 2 |  |

|                |   |   |   |  |
|----------------|---|---|---|--|
| <u>RBFOX2</u>  | 2 | 2 | 0 |  |
| <u>RBM10</u>   | 2 | 0 | 2 |  |
| <u>RBM28</u>   | 2 | 0 | 2 |  |
| <u>RELA</u>    | 2 | 0 | 2 |  |
| <u>REPS2</u>   | 2 | 0 | 2 |  |
| <u>RFC4</u>    | 2 | 0 | 2 |  |
| <u>RFX5</u>    | 2 | 0 | 2 |  |
| <u>RGS17</u>   | 2 | 2 | 0 |  |
| <u>RHOB</u>    | 2 | 0 | 2 |  |
| <u>RIC8B</u>   | 2 | 0 | 2 |  |
| <u>RIPK2</u>   | 2 | 0 | 2 |  |
| <u>RMND5B</u>  | 2 | 0 | 2 |  |
| <u>RNF138</u>  | 2 | 2 | 0 |  |
| <u>RNF14</u>   | 2 | 0 | 2 |  |
| <u>RNF24</u>   | 2 | 2 | 0 |  |
| <u>RNF4</u>    | 2 | 0 | 2 |  |
| <u>RNF41</u>   | 2 | 0 | 2 |  |
| <u>RNF44</u>   | 2 | 0 | 2 |  |
| <u>RNGTT</u>   | 2 | 2 | 0 |  |
| <u>RPH3A</u>   | 2 | 0 | 2 |  |
| <u>RPH3AL</u>  | 2 | 0 | 2 |  |
| <u>RPL13</u>   | 2 | 0 | 2 |  |
| <u>RPL17</u>   | 2 | 0 | 2 |  |
| <u>RPL18</u>   | 2 | 0 | 2 |  |
| <u>RPL27</u>   | 2 | 0 | 2 |  |
| <u>RPL35</u>   | 2 | 0 | 2 |  |
| <u>RPL36A</u>  | 2 | 0 | 2 |  |
| <u>RPL37A</u>  | 2 | 0 | 2 |  |
| <u>RPL6</u>    | 2 | 0 | 2 |  |
| <u>RPS19</u>   | 2 | 0 | 2 |  |
| <u>RPS28</u>   | 2 | 2 | 0 |  |
| <u>RPS6KB1</u> | 2 | 2 | 0 |  |
| <u>RPS6KC1</u> | 2 | 0 | 2 |  |
| <u>RPUSD2</u>  | 2 | 0 | 2 |  |
| <u>RRN3</u>    | 2 | 2 | 0 |  |
| <u>RRN3P1</u>  | 2 | 2 | 0 |  |
| <u>RRP15</u>   | 2 | 0 | 2 |  |
| <u>RRP1B</u>   | 2 | 0 | 2 |  |
| <u>RRP9</u>    | 2 | 0 | 2 |  |
| <u>RSF1</u>    | 2 | 2 | 0 |  |
| <u>RUFY2</u>   | 2 | 0 | 2 |  |
| <u>RUNDC3B</u> | 2 | 0 | 2 |  |
| <u>RUNX1</u>   | 2 | 2 | 0 |  |
| <u>RUVBL1</u>  | 2 | 0 | 2 |  |
| <u>RWDD2B</u>  | 2 | 0 | 2 |  |
| <u>SAP30L</u>  | 2 | 0 | 2 |  |
| <u>SAT1</u>    | 2 | 2 | 0 |  |
| <u>SCAF4</u>   | 2 | 0 | 2 |  |

|                 |   |   |   |  |
|-----------------|---|---|---|--|
| <u>SCARA3</u>   | 2 | 0 | 2 |  |
| <u>SCG5</u>     | 2 | 0 | 2 |  |
| <u>SCGB1D2</u>  | 2 | 2 | 0 |  |
| <u>SCGB2A1</u>  | 2 | 2 | 0 |  |
| <u>SCO2</u>     | 2 | 0 | 2 |  |
| <u>SDAD1</u>    | 2 | 0 | 2 |  |
| <u>SDCBP</u>    | 2 | 2 | 0 |  |
| <u>SDCCAG3</u>  | 2 | 0 | 2 |  |
| <u>SEC14L1</u>  | 2 | 2 | 0 |  |
| <u>SEC22A</u>   | 2 | 0 | 2 |  |
| <u>SEC62</u>    | 2 | 2 | 0 |  |
| <u>SEC63</u>    | 2 | 0 | 2 |  |
| <u>SECISBP2</u> | 2 | 0 | 2 |  |
| <u>SEH1L</u>    | 2 | 0 | 2 |  |
| <u>SEMA4C</u>   | 2 | 2 | 0 |  |
| <u>SEMA5A</u>   | 2 | 0 | 2 |  |
| <u>SERINC5</u>  | 2 | 0 | 2 |  |
| <u>SERPINA1</u> | 2 | 2 | 0 |  |
| <u>SERPINB6</u> | 2 | 0 | 2 |  |
| <u>SERPINI1</u> | 2 | 0 | 2 |  |
| <u>SETD6</u>    | 2 | 0 | 2 |  |
| <u>SF1</u>      | 2 | 2 | 0 |  |
| <u>SF3A3</u>    | 2 | 0 | 2 |  |
| <u>SFPQ</u>     | 2 | 2 | 0 |  |
| <u>SFTPC</u>    | 2 | 2 | 0 |  |
| <u>SGSH</u>     | 2 | 2 | 0 |  |
| <u>SH2D1A</u>   | 2 | 2 | 0 |  |
| <u>SH3BP1</u>   | 2 | 0 | 2 |  |
| <u>SH3YL1</u>   | 2 | 0 | 2 |  |
| <u>SIRT7</u>    | 2 | 2 | 0 |  |
| <u>SKIL</u>     | 2 | 2 | 0 |  |
| <u>SKIV2L</u>   | 2 | 0 | 2 |  |
| <u>SKIV2L2</u>  | 2 | 0 | 2 |  |
| <u>SLC12A7</u>  | 2 | 2 | 0 |  |
| <u>SLC14A1</u>  | 2 | 0 | 2 |  |
| <u>SLC15A2</u>  | 2 | 2 | 0 |  |
| <u>SLC1A2</u>   | 2 | 0 | 2 |  |
| <u>SLC25A1</u>  | 2 | 2 | 0 |  |
| <u>SLC25A15</u> | 2 | 0 | 2 |  |
| <u>SLC25A4</u>  | 2 | 2 | 0 |  |
| <u>SLC25A46</u> | 2 | 0 | 2 |  |
| <u>SLC27A2</u>  | 2 | 0 | 2 |  |
| <u>SLC2A4</u>   | 2 | 2 | 0 |  |
| <u>SLC31A2</u>  | 2 | 2 | 0 |  |
| <u>SLC35F5</u>  | 2 | 2 | 0 |  |
| <u>SLC39A6</u>  | 2 | 0 | 2 |  |
| <u>SLC39A8</u>  | 2 | 2 | 0 |  |
| <u>SLC39A9</u>  | 2 | 2 | 0 |  |

|                |   |   |   |  |
|----------------|---|---|---|--|
| <u>SLC44A1</u> | 2 | 0 | 2 |  |
| <u>SLC45A2</u> | 2 | 2 | 0 |  |
| <u>SLC48A1</u> | 2 | 0 | 2 |  |
| <u>SLC4A8</u>  | 2 | 0 | 2 |  |
| <u>SLC7A11</u> | 2 | 0 | 2 |  |
| <u>SLC9A6</u>  | 2 | 0 | 2 |  |
| <u>SLCO1B3</u> | 2 | 2 | 0 |  |
| <u>SMARCA5</u> | 2 | 2 | 0 |  |
| <u>SMARCC2</u> | 2 | 0 | 2 |  |
| <u>SMARCD2</u> | 2 | 0 | 2 |  |
| <u>SMARCD3</u> | 2 | 2 | 0 |  |
| <u>SMARCE1</u> | 2 | 0 | 2 |  |
| <u>SMC3</u>    | 2 | 0 | 2 |  |
| <u>SMC5</u>    | 2 | 2 | 0 |  |
| <u>SMG7</u>    | 2 | 2 | 0 |  |
| <u>SNAPC1</u>  | 2 | 2 | 0 |  |
| <u>SNN</u>     | 2 | 0 | 2 |  |
| <u>SNRK</u>    | 2 | 2 | 0 |  |
| <u>SNUPN</u>   | 2 | 0 | 2 |  |
| <u>SNX16</u>   | 2 | 2 | 0 |  |
| <u>SNX24</u>   | 2 | 0 | 2 |  |
| <u>SNX3</u>    | 2 | 0 | 2 |  |
| <u>SNX4</u>    | 2 | 0 | 2 |  |
| <u>SNX6</u>    | 2 | 0 | 2 |  |
| <u>SORBS1</u>  | 2 | 2 | 0 |  |
| <u>SORBS3</u>  | 2 | 0 | 2 |  |
| <u>SOX9</u>    | 2 | 2 | 0 |  |
| <u>SP1</u>     | 2 | 2 | 0 |  |
| <u>SP140L</u>  | 2 | 2 | 0 |  |
| <u>SP2</u>     | 2 | 2 | 0 |  |
| <u>SP3</u>     | 2 | 2 | 0 |  |
| <u>SPAG1</u>   | 2 | 2 | 0 |  |
| <u>SPATA20</u> | 2 | 2 | 0 |  |
| <u>SPI1</u>    | 2 | 2 | 0 |  |
| <u>SPP1</u>    | 2 | 0 | 2 |  |
| <u>SPTSSA</u>  | 2 | 2 | 0 |  |
| <u>SRGAP3</u>  | 2 | 2 | 0 |  |
| <u>SRRM2</u>   | 2 | 2 | 0 |  |
| <u>SRSF6</u>   | 2 | 0 | 2 |  |
| <u>SRSF8</u>   | 2 | 0 | 2 |  |
| <u>SS18L2</u>  | 2 | 2 | 0 |  |
| <u>SSR1</u>    | 2 | 0 | 2 |  |
| <u>SSR3</u>    | 2 | 0 | 2 |  |
| <u>SSSCA1</u>  | 2 | 0 | 2 |  |
| <u>ST3GAL4</u> | 2 | 2 | 0 |  |
| <u>ST6GAL1</u> | 2 | 2 | 0 |  |
| <u>STAMBP</u>  | 2 | 0 | 2 |  |
| <u>STAT6</u>   | 2 | 0 | 2 |  |

|                |   |   |   |  |
|----------------|---|---|---|--|
| <u>STC2</u>    | 2 | 0 | 2 |  |
| <u>STK17B</u>  | 2 | 2 | 0 |  |
| <u>STK25</u>   | 2 | 0 | 2 |  |
| <u>STK3</u>    | 2 | 2 | 0 |  |
| <u>STK38L</u>  | 2 | 0 | 2 |  |
| <u>STRN</u>    | 2 | 2 | 0 |  |
| <u>STXBP2</u>  | 2 | 0 | 2 |  |
| <u>SUCLA2</u>  | 2 | 2 | 0 |  |
| <u>SUGP2</u>   | 2 | 2 | 0 |  |
| <u>SUMO2</u>   | 2 | 2 | 0 |  |
| <u>SUMO3</u>   | 2 | 0 | 2 |  |
| <u>SUN1</u>    | 2 | 2 | 0 |  |
| <u>SURF1</u>   | 2 | 0 | 2 |  |
| <u>SUV39H2</u> | 2 | 0 | 2 |  |
| <u>SYNCRIP</u> | 2 | 0 | 2 |  |
| <u>SYNJ2BP</u> | 2 | 2 | 0 |  |
| <u>TAF12</u>   | 2 | 0 | 2 |  |
| <u>TARP</u>    | 2 | 2 | 0 |  |
| <u>TBC1D8</u>  | 2 | 2 | 0 |  |
| <u>TBC1D9B</u> | 2 | 2 | 0 |  |
| <u>TBCCD1</u>  | 2 | 0 | 2 |  |
| <u>TBL3</u>    | 2 | 0 | 2 |  |
| <u>TCEA2</u>   | 2 | 0 | 2 |  |
| <u>TCEB3</u>   | 2 | 0 | 2 |  |
| <u>TCERG1</u>  | 2 | 0 | 2 |  |
| <u>TDG</u>     | 2 | 2 | 0 |  |
| <u>TDRD7</u>   | 2 | 0 | 2 |  |
| <u>TERF1</u>   | 2 | 0 | 2 |  |
| <u>TERF2IP</u> | 2 | 2 | 0 |  |
| <u>TEX261</u>  | 2 | 0 | 2 |  |
| <u>TFAP2A</u>  | 2 | 2 | 0 |  |
| <u>TFB1M</u>   | 2 | 0 | 2 |  |
| <u>TFCP2L1</u> | 2 | 0 | 2 |  |
| <u>TFDP1</u>   | 2 | 0 | 2 |  |
| <u>TFPI</u>    | 2 | 0 | 2 |  |
| <u>TFRC</u>    | 2 | 0 | 2 |  |
| <u>TGIF1</u>   | 2 | 0 | 2 |  |
| <u>TGM2</u>    | 2 | 2 | 0 |  |
| <u>TGOLN2</u>  | 2 | 2 | 0 |  |
| <u>THAP4</u>   | 2 | 0 | 2 |  |
| <u>THBS1</u>   | 2 | 2 | 0 |  |
| <u>THOC1</u>   | 2 | 0 | 2 |  |
| <u>THY1</u>    | 2 | 2 | 0 |  |
| <u>TIA1</u>    | 2 | 0 | 2 |  |
| <u>TIMM17B</u> | 2 | 0 | 2 |  |
| <u>TIPIN</u>   | 2 | 0 | 2 |  |
| <u>TJP2</u>    | 2 | 0 | 2 |  |
| <u>TJP3</u>    | 2 | 0 | 2 |  |

|                 |   |   |   |  |
|-----------------|---|---|---|--|
| <u>TLE3</u>     | 2 | 0 | 2 |  |
| <u>TLE4</u>     | 2 | 2 | 0 |  |
| <u>TLR2</u>     | 2 | 0 | 2 |  |
| <u>TM9SF2</u>   | 2 | 0 | 2 |  |
| <u>TMCC2</u>    | 2 | 0 | 2 |  |
| <u>TMED1</u>    | 2 | 2 | 0 |  |
| <u>TMEM135</u>  | 2 | 2 | 0 |  |
| <u>TMEM30A</u>  | 2 | 2 | 0 |  |
| <u>TMEM30B</u>  | 2 | 2 | 0 |  |
| <u>TMF1</u>     | 2 | 2 | 0 |  |
| <u>TMOD3</u>    | 2 | 0 | 2 |  |
| <u>TMX2</u>     | 2 | 0 | 2 |  |
| <u>TNF</u>      | 2 | 2 | 0 |  |
| <u>TNIK</u>     | 2 | 0 | 2 |  |
| <u>TNMD</u>     | 2 | 2 | 0 |  |
| <u>TNPO1</u>    | 2 | 0 | 2 |  |
| <u>TNPO3</u>    | 2 | 0 | 2 |  |
| <u>TNS3</u>     | 2 | 0 | 2 |  |
| <u>TOB2</u>     | 2 | 2 | 0 |  |
| <u>TOMM70A</u>  | 2 | 0 | 2 |  |
| <u>TOP1</u>     | 2 | 2 | 0 |  |
| <u>TOP3A</u>    | 2 | 2 | 0 |  |
| <u>TOR1AIP1</u> | 2 | 2 | 0 |  |
| <u>TPD52L2</u>  | 2 | 0 | 2 |  |
| <u>TPK1</u>     | 2 | 0 | 2 |  |
| <u>TPM1</u>     | 2 | 0 | 2 |  |
| <u>TPR</u>      | 2 | 2 | 0 |  |
| <u>TPRKB</u>    | 2 | 0 | 2 |  |
| <u>TPSB2</u>    | 2 | 0 | 2 |  |
| <u>TRA2B</u>    | 2 | 0 | 2 |  |
| <u>TRAF5</u>    | 2 | 0 | 2 |  |
| <u>TRAPPC2L</u> | 2 | 2 | 0 |  |
| <u>TREM2</u>    | 2 | 2 | 0 |  |
| <u>TRIM16</u>   | 2 | 0 | 2 |  |
| <u>TRIM24</u>   | 2 | 2 | 0 |  |
| <u>TRIM26</u>   | 2 | 0 | 2 |  |
| <u>TRIM27</u>   | 2 | 0 | 2 |  |
| <u>TRIM44</u>   | 2 | 0 | 2 |  |
| <u>TRIM5</u>    | 2 | 2 | 0 |  |
| <u>TRMT1L</u>   | 2 | 0 | 2 |  |
| <u>TRMT2B</u>   | 2 | 0 | 2 |  |
| <u>TRMU</u>     | 2 | 0 | 2 |  |
| <u>TRPC1</u>    | 2 | 2 | 0 |  |
| <u>TSC1</u>     | 2 | 2 | 0 |  |
| <u>TSC22D2</u>  | 2 | 2 | 0 |  |
| <u>TSC22D3</u>  | 2 | 2 | 0 |  |
| <u>TSEN2</u>    | 2 | 0 | 2 |  |
| <u>TSEN34</u>   | 2 | 2 | 0 |  |

|                |   |   |   |  |
|----------------|---|---|---|--|
| <u>TSKU</u>    | 2 | 2 | 0 |  |
| <u>TSN</u>     | 2 | 0 | 2 |  |
| <u>TSPAN14</u> | 2 | 2 | 0 |  |
| <u>TSPAN3</u>  | 2 | 0 | 2 |  |
| <u>TSPAN5</u>  | 2 | 0 | 2 |  |
| <u>TSPO</u>    | 2 | 0 | 2 |  |
| <u>TTBK2</u>   | 2 | 2 | 0 |  |
| <u>TTC27</u>   | 2 | 0 | 2 |  |
| <u>TTC38</u>   | 2 | 2 | 0 |  |
| <u>TUBB</u>    | 2 | 0 | 2 |  |
| <u>TUBGCP3</u> | 2 | 0 | 2 |  |
| <u>TXN2</u>    | 2 | 2 | 0 |  |
| <u>TYMS</u>    | 2 | 0 | 2 |  |
| <u>UBAC1</u>   | 2 | 0 | 2 |  |
| <u>UBE2H</u>   | 2 | 2 | 0 |  |
| <u>UBE2J1</u>  | 2 | 0 | 2 |  |
| <u>UBE2L6</u>  | 2 | 2 | 0 |  |
| <u>UBE2M</u>   | 2 | 0 | 2 |  |
| <u>UBL4A</u>   | 2 | 0 | 2 |  |
| <u>UBR4</u>    | 2 | 2 | 0 |  |
| <u>UGT2A3</u>  | 2 | 0 | 2 |  |
| <u>UGT2B28</u> | 2 | 0 | 2 |  |
| <u>UNC119</u>  | 2 | 0 | 2 |  |
| <u>UPF3A</u>   | 2 | 0 | 2 |  |
| <u>UQCC</u>    | 2 | 0 | 2 |  |
| <u>URB2</u>    | 2 | 0 | 2 |  |
| <u>USP14</u>   | 2 | 0 | 2 |  |
| <u>UST</u>     | 2 | 0 | 2 |  |
| <u>UTP18</u>   | 2 | 0 | 2 |  |
| <u>UTP6</u>    | 2 | 0 | 2 |  |
| <u>VAMP2</u>   | 2 | 2 | 0 |  |
| <u>VAMP3</u>   | 2 | 0 | 2 |  |
| <u>VAX2</u>    | 2 | 2 | 0 |  |
| <u>VCL</u>     | 2 | 2 | 0 |  |
| <u>VCP</u>     | 2 | 2 | 0 |  |
| <u>VCPIP1</u>  | 2 | 2 | 0 |  |
| <u>VDAC1</u>   | 2 | 0 | 2 |  |
| <u>VEGFC</u>   | 2 | 2 | 0 |  |
| <u>VOPP1</u>   | 2 | 0 | 2 |  |
| <u>VPS13B</u>  | 2 | 2 | 0 |  |
| <u>VPS54</u>   | 2 | 0 | 2 |  |
| <u>WAC</u>     | 2 | 2 | 0 |  |
| <u>WAS</u>     | 2 | 2 | 0 |  |
| <u>WASF3</u>   | 2 | 0 | 2 |  |
| <u>WDR11</u>   | 2 | 0 | 2 |  |
| <u>WDR12</u>   | 2 | 0 | 2 |  |
| <u>WDR3</u>    | 2 | 0 | 2 |  |
| <u>WDR41</u>   | 2 | 0 | 2 |  |

|                |   |   |   |  |
|----------------|---|---|---|--|
| <u>WDR44</u>   | 2 | 0 | 2 |  |
| <u>WDR59</u>   | 2 | 2 | 0 |  |
| <u>WDR61</u>   | 2 | 0 | 2 |  |
| <u>WDR62</u>   | 2 | 0 | 2 |  |
| <u>WDR7</u>    | 2 | 2 | 0 |  |
| <u>WDR74</u>   | 2 | 0 | 2 |  |
| <u>WDR77</u>   | 2 | 0 | 2 |  |
| <u>WEE1</u>    | 2 | 2 | 0 |  |
| <u>WIF1</u>    | 2 | 2 | 0 |  |
| <u>WISP2</u>   | 2 | 2 | 0 |  |
| <u>WIZ</u>     | 2 | 2 | 0 |  |
| <u>WSB2</u>    | 2 | 0 | 2 |  |
| <u>WWP1</u>    | 2 | 0 | 2 |  |
| <u>XIAP</u>    | 2 | 2 | 0 |  |
| <u>XPC</u>     | 2 | 0 | 2 |  |
| <u>XPO4</u>    | 2 | 2 | 0 |  |
| <u>XRCC1</u>   | 2 | 0 | 2 |  |
| <u>YIPF2</u>   | 2 | 0 | 2 |  |
| <u>YTHDF1</u>  | 2 | 0 | 2 |  |
| <u>YY1API</u>  | 2 | 2 | 0 |  |
| <u>ZBTB1</u>   | 2 | 2 | 0 |  |
| <u>ZBTB17</u>  | 2 | 2 | 0 |  |
| <u>ZBTB39</u>  | 2 | 0 | 2 |  |
| <u>ZBTB7A</u>  | 2 | 2 | 0 |  |
| <u>ZC3H14</u>  | 2 | 0 | 2 |  |
| <u>ZDHHC17</u> | 2 | 2 | 0 |  |
| <u>ZDHHC4</u>  | 2 | 0 | 2 |  |
| <u>ZEB2</u>    | 2 | 0 | 2 |  |
| <u>ZFC3H1</u>  | 2 | 0 | 2 |  |
| <u>ZG16</u>    | 2 | 0 | 2 |  |
| <u>ZKSCAN4</u> | 2 | 0 | 2 |  |
| <u>ZNF10</u>   | 2 | 2 | 0 |  |
| <u>ZNF175</u>  | 2 | 0 | 2 |  |
| <u>ZNF202</u>  | 2 | 0 | 2 |  |
| <u>ZNF222</u>  | 2 | 2 | 0 |  |
| <u>ZNF268</u>  | 2 | 2 | 0 |  |
| <u>ZNF324</u>  | 2 | 2 | 0 |  |
| <u>ZNF329</u>  | 2 | 2 | 0 |  |
| <u>ZNF335</u>  | 2 | 2 | 0 |  |
| <u>ZNF394</u>  | 2 | 2 | 0 |  |
| <u>ZNF442</u>  | 2 | 2 | 0 |  |
| <u>ZNF467</u>  | 2 | 2 | 0 |  |
| <u>ZNF500</u>  | 2 | 0 | 2 |  |
| <u>ZNF518A</u> | 2 | 2 | 0 |  |
| <u>ZNF544</u>  | 2 | 0 | 2 |  |
| <u>ZNF571</u>  | 2 | 2 | 0 |  |
| <u>ZNF609</u>  | 2 | 2 | 0 |  |
| <u>ZNF668</u>  | 2 | 0 | 2 |  |

|         |   |   |   |  |
|---------|---|---|---|--|
| ZNF710  | 2 | 0 | 2 |  |
| ZNF750  | 2 | 2 | 0 |  |
| ZNF787  | 2 | 0 | 2 |  |
| ZNF83   | 2 | 0 | 2 |  |
| ZNF85   | 2 | 0 | 2 |  |
| ZNHIT2  | 2 | 0 | 2 |  |
| ZSCAN12 | 2 | 2 | 0 |  |
